# Supplementary material for: Comparing the evolutionary dynamics of predominant SARS-CoV-2 virus lineages co-circulating in Mexico
Source: eLife. 2023 Jul 27;12:e82069. doi: 10.7554/eLife.82069 (PMC10431917; doi:10.7554/eLife.82069)
Supplement: Supplementary file 1. [file elife-82069-supp1.xlsx]

## Sheet: PANGO_ROOT
Name	Country	ID	GSAID	Lineage	Date
China|IPBCAMS-WH-01|EPI_ISL_402123|B|2019-12-24	China	IPBCAMS-WH-01	EPI_ISL_402123	B	2019-12-24
China|WH01|EPI_ISL_406798|B|2019-12-26	China	WH01	EPI_ISL_406798	B	2019-12-26
China|HBCDC-HB-01|EPI_ISL_402132|B|2019-12-30	China	HBCDC-HB-01	EPI_ISL_402132	B	2019-12-30
China|HBCDC-HB-02|EPI_ISL_412898|B|2019-12-30	China	HBCDC-HB-02	EPI_ISL_412898	B	2019-12-30
China|HBCDC-HB-03|EPI_ISL_412899|B|2019-12-30	China	HBCDC-HB-03	EPI_ISL_412899	B	2019-12-30
China|IME-WH01|EPI_ISL_529213|A|2019-12-30	China	IME-WH01	EPI_ISL_529213	A	2019-12-30
China|IME-WH02|EPI_ISL_529214|B|2019-12-30	China	IME-WH02	EPI_ISL_529214	B	2019-12-30
China|IME-WH03|EPI_ISL_529215|B|2019-12-30	China	IME-WH03	EPI_ISL_529215	B	2019-12-30
China|IME-WH04|EPI_ISL_529216|B|2019-12-30	China	IME-WH04	EPI_ISL_529216	B	2019-12-30
China|IME-WH05|EPI_ISL_529217|B|2019-12-30	China	IME-WH05	EPI_ISL_529217	B	2019-12-30
China|IPBCAMS-WH-02|EPI_ISL_403931|B|2019-12-30	China	IPBCAMS-WH-02	EPI_ISL_403931	B	2019-12-30
China|IPBCAMS-WH-03|EPI_ISL_403930|B|2019-12-30	China	IPBCAMS-WH-03	EPI_ISL_403930	B	2019-12-30
China|IPBCAMS-WH-04|EPI_ISL_403929|B|2019-12-30	China	IPBCAMS-WH-04	EPI_ISL_403929	B	2019-12-30
China|IVDC-HB-01|EPI_ISL_402119|B|2019-12-30	China	IVDC-HB-01	EPI_ISL_402119	B	2019-12-30
China|IVDC-HB-05|EPI_ISL_402121|B|2019-12-30	China	IVDC-HB-05	EPI_ISL_402121	B	2019-12-30
China|IVDC-HB-GX02|EPI_ISL_434534|B|2019-12-30	China	IVDC-HB-GX02	EPI_ISL_434534	B	2019-12-30
China|WIV02|EPI_ISL_402127|B|2019-12-30	China	WIV02	EPI_ISL_402127	B	2019-12-30
China|WIV04|EPI_ISL_402124|B|2019-12-30	China	WIV04	EPI_ISL_402124	B	2019-12-30
China|WIV05|EPI_ISL_402128|B|2019-12-30	China	WIV05	EPI_ISL_402128	B	2019-12-30
China|WIV06|EPI_ISL_402129|B|2019-12-30	China	WIV06	EPI_ISL_402129	B	2019-12-30
China|WIV07|EPI_ISL_402130|B|2019-12-30	China	WIV07	EPI_ISL_402130	B	2019-12-30
China|Hu-1|EPI_ISL_402125|B|2019-12-31	China	Hu-1	EPI_ISL_402125	B	2019-12-31
Argentina|PAIS-A1026|EPI_ISL_4405694|B.1.499|2020-01-01	Argentina	PAIS-A1026	EPI_ISL_4405694	B.1.499	2020-01-01
China|IPBCAMS-WH-05|EPI_ISL_403928|B|2020-01-01	China	IPBCAMS-WH-05	EPI_ISL_403928	B	2020-01-01
China|IVDC-HB-04|EPI_ISL_402120|B|2020-01-01	China	IVDC-HB-04	EPI_ISL_402120	B	2020-01-01
China|WH03|EPI_ISL_406800|B|2020-01-01	China	WH03	EPI_ISL_406800	B	2020-01-01
France|un-20_B.|EPI_ISL_4537783|B.1|2020-01-01	France	un-20_B.	EPI_ISL_4537783	B.1	2020-01-01
China|HZ103|EPI_ISL_422425|B.1|2020-01-24	China	HZ103	EPI_ISL_422425	B.1	2020-01-24
China|SC-PHCC1-022|EPI_ISL_451345|B.1|2020-01-24	China	SC-PHCC1-022	EPI_ISL_451345	B.1	2020-01-24
China|AP8|EPI_ISL_1655937|A.17|2020-01-25	China	AP8	EPI_ISL_1655937	A.17	2020-01-25
Hong_Kong|HKU-200723-004|EPI_ISL_497771|B.42|2020-01-29	Hong_Kong	HKU-200723-004	EPI_ISL_497771	B.42	2020-01-29
Hong_Kong|HKPU23_2601|EPI_ISL_417183|B.43|2020-01-30	Hong_Kong	HKPU23_2601	EPI_ISL_417183	B.43	2020-01-30
China|SH0054|EPI_ISL_416362|B|2020-02-02	China	SH0054	EPI_ISL_416362	B	2020-02-02
Panama|GMI-PA352445|EPI_ISL_1225382|A.2.4|2020-02-04	Panama	GMI-PA352445	EPI_ISL_1225382	A.2.4	2020-02-04
Spain|MD-IBV-99018532|EPI_ISL_1014733|B.1.177|2020-02-14	Spain	MD-IBV-99018532	EPI_ISL_1014733	B.1.177	2020-02-14
USA|Cruise-CDC-3054886-001|EPI_ISL_414480|B|2020-02-21	USA	Cruise-CDC-3054886-001	EPI_ISL_414480	B	2020-02-21
China|GZMU0031|EPI_ISL_414687|B|2020-02-25	China	GZMU0031	EPI_ISL_414687	B	2020-02-25
United_Arab_Emirates|L0184|EPI_ISL_435121|B.4.6|2020-02-25	United_Arab_Emirates	L0184	EPI_ISL_435121	B.4.6	2020-02-25
France|BRE-1623|EPI_ISL_418219|B.1|2020-02-26	France	BRE-1623	EPI_ISL_418219	B.1	2020-02-26
Netherlands|Tilburg_1363354|EPI_ISL_413586|B.11|2020-02-27	Netherlands	Tilburg_1363354	EPI_ISL_413586	B.11	2020-02-27
Senegal|003|EPI_ISL_418206|B.1.356|2020-02-28	Senegal	3	EPI_ISL_418206	B.1.356	2020-02-28
Spain|IB-IBV-99007264|EPI_ISL_541968|B.1.1.44|2020-02-28	Spain	IB-IBV-99007264	EPI_ISL_541968	B.1.1.44	2020-02-28
United_Kingdom|201061454|EPI_ISL_464412|B.1.1.323|2020-02-29	United_Kingdom	201061454	EPI_ISL_464412	B.1.1.323	2020-02-29
USA|GA-CDC-03063103-001|EPI_ISL_419557|B.1.1.61|2020-02-29	USA	GA-CDC-03063103-001	EPI_ISL_419557	B.1.1.61	2020-02-29
Brazil|RJ-IC0102020_158-20|EPI_ISL_1739298|B.1.1.33|2020-03-01	Brazil	RJ-IC0102020_158-20	EPI_ISL_1739298	B.1.1.33	2020-03-01
Belgium|VI-03027|EPI_ISL_417427|B.1.1.319|2020-03-02	Belgium	VI-03027	EPI_ISL_417427	B.1.1.319	2020-03-02
United_Kingdom|NORT-2A6222|EPI_ISL_507128|B.57|2020-03-02	United_Kingdom	NORT-2A6222	EPI_ISL_507128	B.57	2020-03-02
New_Zealand|20VR1109|EPI_ISL_456190|B.31|2020-03-03	New_Zealand	20VR1109	EPI_ISL_456190	B.31	2020-03-03
United_Kingdom|20108006603|EPI_ISL_417253|B|2020-03-03	United_Kingdom	20108006603	EPI_ISL_417253	B	2020-03-03
France|HDF-1993|EPI_ISL_414637|B.1.277|2020-03-04	France	HDF-1993	EPI_ISL_414637	B.1.277	2020-03-04
Italy|LOM-UniMI-L343|EPI_ISL_542282|B.1.380|2020-03-04	Italy	LOM-UniMI-L343	EPI_ISL_542282	B.1.380	2020-03-04
Italy|VEN-SI_104|EPI_ISL_1181779|B.1.1.161|2020-03-04	Italy	VEN-SI_104	EPI_ISL_1181779	B.1.1.161	2020-03-04
Netherlands|NoordBrabant_21|EPI_ISL_414530|B.1.8|2020-03-04	Netherlands	NoordBrabant_21	EPI_ISL_414530	B.1.8	2020-03-04
United_Kingdom|201061034|EPI_ISL_464404|B.58|2020-03-04	United_Kingdom	201061034	EPI_ISL_464404	B.58	2020-03-04
Brazil|SP-14|EPI_ISL_416036|B.1.1.28|2020-03-05	Brazil	SP-14	EPI_ISL_416036	B.1.1.28	2020-03-05
Netherlands|GE-EMC-217|EPI_ISL_523199|B.1.22|2020-03-05	Netherlands	GE-EMC-217	EPI_ISL_523199	B.1.22	2020-03-05
Singapore|27|EPI_ISL_420104|B.35|2020-03-05	Singapore	27	EPI_ISL_420104	B.35	2020-03-05
France|ARA-06531|EPI_ISL_416756|B.1.387|2020-03-06	France	ARA-06531	EPI_ISL_416756	B.1.387	2020-03-06
Iceland|62|EPI_ISL_417757|B.1.1.17|2020-03-06	Iceland	62	EPI_ISL_417757	B.1.1.17	2020-03-06
Italy|UMB-ISS-3867|EPI_ISL_856906|B.1.1.70|2020-03-06	Italy	UMB-ISS-3867	EPI_ISL_856906	B.1.1.70	2020-03-06
United_Kingdom|20109028804|EPI_ISL_464549|B.1.201|2020-03-06	United_Kingdom	20109028804	EPI_ISL_464549	B.1.201	2020-03-06
United_Kingdom|20109098906|EPI_ISL_417296|B.47|2020-03-06	United_Kingdom	20109098906	EPI_ISL_417296	B.47	2020-03-06
Belgium|HC-030760|EPI_ISL_420451|B.1.1.371|2020-03-07	Belgium	HC-030760	EPI_ISL_420451	B.1.1.371	2020-03-07
Belgium|ULG-3683|EPI_ISL_417011|B.38|2020-03-07	Belgium	ULG-3683	EPI_ISL_417011	B.38	2020-03-07
Iceland|63|EPI_ISL_417855|B.1.510|2020-03-07	Iceland	63	EPI_ISL_417855	B.1.510	2020-03-07
Italy|VEN-SI_139|EPI_ISL_1181818|B.1.1.204|2020-03-07	Italy	VEN-SI_139	EPI_ISL_1181818	B.1.1.204	2020-03-07
Australia|SA0633|EPI_ISL_1229177|B.1.36.31|2020-03-08	Australia	SA0633	EPI_ISL_1229177	B.1.36.31	2020-03-08
Australia|VIC1703|EPI_ISL_456588|B.4.5|2020-03-09	Australia	VIC1703	EPI_ISL_456588	B.4.5	2020-03-09
Denmark|DCGC-961|EPI_ISL_614557|B.1.179|2020-03-09	Denmark	DCGC-961	EPI_ISL_614557	B.1.179	2020-03-09
Denmark|DCGC-979|EPI_ISL_614577|B.1.39|2020-03-09	Denmark	DCGC-979	EPI_ISL_614577	B.1.39	2020-03-09
Denmark|DCGC-991|EPI_ISL_614581|B.1.118|2020-03-09	Denmark	DCGC-991	EPI_ISL_614581	B.1.118	2020-03-09
United_Kingdom|201140778|EPI_ISL_464741|B.1.284|2020-03-09	United_Kingdom	201140778	EPI_ISL_464741	B.1.284	2020-03-09
United_Kingdom|201141581|EPI_ISL_464766|B.1.391|2020-03-09	United_Kingdom	201141581	EPI_ISL_464766	B.1.391	2020-03-09
USA|LA-CDC-03068669-001|EPI_ISL_424868|B.1.595|2020-03-09	USA	LA-CDC-03068669-001	EPI_ISL_424868	B.1.595	2020-03-09
USA|RI-CDC-03068674-001|EPI_ISL_426435|B.1|2020-03-09	USA	RI-CDC-03068674-001	EPI_ISL_426435	B.1	2020-03-09
India|MH-ICMR-C300|EPI_ISL_1055383|B.1.210|2020-03-10	India	MH-ICMR-C300	EPI_ISL_1055383	B.1.210	2020-03-10
Finland|11MS2F2|EPI_ISL_1218651|B.1|2020-03-11	Finland	11MS2F2	EPI_ISL_1218651	B.1	2020-03-11
Greece|136|EPI_ISL_434473|B.1.1.16|2020-03-11	Greece	136	EPI_ISL_434473	B.1.1.16	2020-03-11
Sweden|20-05444|EPI_ISL_445221|B.1.555|2020-03-11	Sweden	20-05444	EPI_ISL_445221	B.1.555	2020-03-11
Switzerland|BS-UHB-42185807|EPI_ISL_530122|B.1|2020-03-11	Switzerland	BS-UHB-42185807	EPI_ISL_530122	B.1	2020-03-11
United_Kingdom|LIVE-A4B49|EPI_ISL_500074|B.1.1.372|2020-03-11	United_Kingdom	LIVE-A4B49	EPI_ISL_500074	B.1.1.372	2020-03-11
USA|MD-HP00076|EPI_ISL_438234|A.3|2020-03-11	USA	MD-HP00076	EPI_ISL_438234	A.3	2020-03-11
USA|OH-ODH-SC149737|EPI_ISL_1165135|B.1.564|2020-03-11	USA	OH-ODH-SC149737	EPI_ISL_1165135	B.1.564	2020-03-11
China|DT-travelNO01|EPI_ISL_452342|B|2020-03-12	China	DT-travelNO01	EPI_ISL_452342	B	2020-03-12
France|HDF-2405|EPI_ISL_418228|B.1.354|2020-03-12	France	HDF-2405	EPI_ISL_418228	B.1.354	2020-03-12
Sweden|20-50299|EPI_ISL_475129|B.1.1.135|2020-03-12	Sweden	20-50299	EPI_ISL_475129	B.1.1.135	2020-03-12
United_Kingdom|201160037|EPI_ISL_464779|B.1.250|2020-03-12	United_Kingdom	201160037	EPI_ISL_464779	B.1.250	2020-03-12
United_Kingdom|20118179304|EPI_ISL_465000|B.1.1.89|2020-03-12	United_Kingdom	20118179304	EPI_ISL_465000	B.1.1.89	2020-03-12
United_Kingdom|20129154104|EPI_ISL_424118|B.52|2020-03-12	United_Kingdom	20129154104	EPI_ISL_424118	B.52	2020-03-12
United_Kingdom|BRIS-1309ED|EPI_ISL_492694|B.10|2020-03-12	United_Kingdom	BRIS-1309ED	EPI_ISL_492694	B.10	2020-03-12
USA|NY-QDX-87|EPI_ISL_468582|B.1.586|2020-03-12	USA	NY-QDX-87	EPI_ISL_468582	B.1.586	2020-03-12
USA|UT-QDX-2230|EPI_ISL_604591|B.1.413|2020-03-12	USA	UT-QDX-2230	EPI_ISL_604591	B.1.413	2020-03-12
Canada|QC-LSPQ-L00217574|EPI_ISL_535765|B.1.547|2020-03-13	Canada	QC-LSPQ-L00217574	EPI_ISL_535765	B.1.547	2020-03-13
Finland|13M33|EPI_ISL_418390|B.1.158|2020-03-13	Finland	13M33	EPI_ISL_418390	B.1.158	2020-03-13
Qatar|QA-QU_02-2-44|EPI_ISL_1712699|B.36|2020-03-13	Qatar	QA-QU_02-2-44	EPI_ISL_1712699	B.36	2020-03-13
Switzerland|BS-UHB-42189582|EPI_ISL_528046|B.1.128|2020-03-13	Switzerland	BS-UHB-42189582	EPI_ISL_528046	B.1.128	2020-03-13
United_Kingdom|CVR33|EPI_ISL_425762|B.45|2020-03-13	United_Kingdom	CVR33	EPI_ISL_425762	B.45	2020-03-13
United_Kingdom|CVR47|EPI_ISL_425776|B.32|2020-03-13	United_Kingdom	CVR47	EPI_ISL_425776	B.32	2020-03-13
USA|NY-PV08125|EPI_ISL_421354|B.1.314|2020-03-13	USA	NY-PV08125	EPI_ISL_421354	B.1.314	2020-03-13
USA|WI-UW-22|EPI_ISL_417514|A.4|2020-03-13	USA	WI-UW-22	EPI_ISL_417514	A.4	2020-03-13
Germany|HH-hpi-p1504|EPI_ISL_776010|B.1.465|2020-03-14	Germany	HH-hpi-p1504	EPI_ISL_776010	B.1.465	2020-03-14
United_Arab_Emirates|L9766|EPI_ISL_435142|B.56|2020-03-14	United_Arab_Emirates	L9766	EPI_ISL_435142	B.56	2020-03-14
United_Kingdom|GSTT-265E3C2|EPI_ISL_484195|B.1.391|2020-03-14	United_Kingdom	GSTT-265E3C2	EPI_ISL_484195	B.1.391	2020-03-14
USA|CT-UW328|EPI_ISL_418895|B.1.108|2020-03-14	USA	CT-UW328	EPI_ISL_418895	B.1.108	2020-03-14
USA|TX-HMH046|EPI_ISL_434755|B.1.450|2020-03-14	USA	TX-HMH046	EPI_ISL_434755	B.1.450	2020-03-14
Australia|NSW2004|EPI_ISL_500596|B.1.384|2020-03-15	Australia	NSW2004	EPI_ISL_500596	B.1.384	2020-03-15
Luxembourg|LNS0366116|EPI_ISL_419564|B.1.94|2020-03-15	Luxembourg	LNS0366116	EPI_ISL_419564	B.1.94	2020-03-15
United_Kingdom|20122017204|EPI_ISL_465738|B.1.1|2020-03-15	United_Kingdom	20122017204	EPI_ISL_465738	B.1.1	2020-03-15
USA|IL-NM025|EPI_ISL_444535|B.1.162|2020-03-15	USA	IL-NM025	EPI_ISL_444535	B.1.162	2020-03-15
USA|MN-QDX-1320|EPI_ISL_572109|B.1.589|2020-03-15	USA	MN-QDX-1320	EPI_ISL_572109	B.1.589	2020-03-15
USA|NY-PV09362|EPI_ISL_450050|B.1.507|2020-03-15	USA	NY-PV09362	EPI_ISL_450050	B.1.507	2020-03-15
USA|TX-QDX-25|EPI_ISL_467906|B.1.324|2020-03-15	USA	TX-QDX-25	EPI_ISL_467906	B.1.324	2020-03-15
USA|WI-UW-158|EPI_ISL_428254|B.1.483|2020-03-15	USA	WI-UW-158	EPI_ISL_428254	B.1.483	2020-03-15
Australia|VIC95|EPI_ISL_419806|B.1|2020-03-16	Australia	VIC95	EPI_ISL_419806	B.1	2020-03-16
Iceland|188|EPI_ISL_417816|B.1.1.5|2020-03-16	Iceland	188	EPI_ISL_417816	B.1.1.5	2020-03-16
Japan|PG-0189|EPI_ISL_479894|B.1.1.283|2020-03-16	Japan	PG-0189	EPI_ISL_479894	B.1.1.283	2020-03-16
Portugal|PT1095|EPI_ISL_511642|B.1.224|2020-03-16	Portugal	PT1095	EPI_ISL_511642	B.1.224	2020-03-16
Sweden|20-23088|EPI_ISL_831975|B.1.227|2020-03-16	Sweden	20-23088	EPI_ISL_831975	B.1.227	2020-03-16
Switzerland|BS-UHB-42193328|EPI_ISL_528149|B.1|2020-03-16	Switzerland	BS-UHB-42193328	EPI_ISL_528149	B.1	2020-03-16
Switzerland|SG-ETHZ-100145|EPI_ISL_451729|B.1.1.142|2020-03-16	Switzerland	SG-ETHZ-100145	EPI_ISL_451729	B.1.1.142	2020-03-16
United_Arab_Emirates|L0879|EPI_ISL_435124|B.1.1.366|2020-03-16	United_Arab_Emirates	L0879	EPI_ISL_435124	B.1.1.366	2020-03-16
United_Kingdom|BRIS-12193A|EPI_ISL_440220|B.1.379|2020-03-16	United_Kingdom	BRIS-12193A	EPI_ISL_440220	B.1.379	2020-03-16
USA|CA-CZB-1414|EPI_ISL_468389|B.1.163|2020-03-16	USA	CA-CZB-1414	EPI_ISL_468389	B.1.163	2020-03-16
USA|CA-QDX-1915|EPI_ISL_604200|B.1.441|2020-03-16	USA	CA-QDX-1915	EPI_ISL_604200	B.1.441	2020-03-16
USA|FL-QDX-1620|EPI_ISL_603938|B.1.293|2020-03-16	USA	FL-QDX-1620	EPI_ISL_603938	B.1.293	2020-03-16
USA|LA-QDX-2624|EPI_ISL_604936|B.1.284|2020-03-16	USA	LA-QDX-2624	EPI_ISL_604936	B.1.284	2020-03-16
USA|MN-QDX-1722|EPI_ISL_604071|B.1.424|2020-03-16	USA	MN-QDX-1722	EPI_ISL_604071	B.1.424	2020-03-16
Belgium|UGent-96|EPI_ISL_468744|B.1.1.75|2020-03-17	Belgium	UGent-96	EPI_ISL_468744	B.1.1.75	2020-03-17
France|GES-2843|EPI_ISL_420045|B.1.482|2020-03-17	France	GES-2843	EPI_ISL_420045	B.1.482	2020-03-17
United_Kingdom|EDB051|EPI_ISL_425855|B.1.1.277|2020-03-17	United_Kingdom	EDB051	EPI_ISL_425855	B.1.1.277	2020-03-17
USA|WA-UW389|EPI_ISL_418954|B.1.38|2020-03-17	USA	WA-UW389	EPI_ISL_418954	B.1.38	2020-03-17
Australia|VIC774|EPI_ISL_427050|B.1.23|2020-03-18	Australia	VIC774	EPI_ISL_427050	B.1.23	2020-03-18
United_Kingdom|BRIS-121C9B|EPI_ISL_440218|B.1.81|2020-03-18	United_Kingdom	BRIS-121C9B	EPI_ISL_440218	B.1.81	2020-03-18
USA|FL-QDX-1658|EPI_ISL_603941|B.1.1.67|2020-03-18	USA	FL-QDX-1658	EPI_ISL_603941	B.1.1.67	2020-03-18
Australia|VIC191|EPI_ISL_419887|B.1.1.416|2020-03-19	Australia	VIC191	EPI_ISL_419887	B.1.1.416	2020-03-19
Denmark|ALAB-HH-157|EPI_ISL_452032|B.1.263|2020-03-19	Denmark	ALAB-HH-157	EPI_ISL_452032	B.1.263	2020-03-19
Germany|HH-hpi-p1783|EPI_ISL_776154|B.1|2020-03-19	Germany	HH-hpi-p1783	EPI_ISL_776154	B.1	2020-03-19
United_Kingdom|SHEF-CBCA3|EPI_ISL_432515|B.1.1.137|2020-03-19	United_Kingdom	SHEF-CBCA3	EPI_ISL_432515	B.1.1.137	2020-03-19
USA|CA-QDX-1625|EPI_ISL_603907|B.1.170|2020-03-19	USA	CA-QDX-1625	EPI_ISL_603907	B.1.170	2020-03-19
USA|UT-028|EPI_ISL_417971|B.1.370|2020-03-19	USA	UT-028	EPI_ISL_417971	B.1.370	2020-03-19
Portugal|PT0513|EPI_ISL_454237|B.1.1.88|2020-03-20	Portugal	PT0513	EPI_ISL_454237	B.1.1.88	2020-03-20
Senegal|620|EPI_ISL_420078|A.11|2020-03-20	Senegal	620	EPI_ISL_420078	A.11	2020-03-20
United_Kingdom|PHWC-24F09|EPI_ISL_420926|B.1.1.289|2020-03-20	United_Kingdom	PHWC-24F09	EPI_ISL_420926	B.1.1.289	2020-03-20
Australia|QLD1276|EPI_ISL_693277|B.1.177.7|2020-03-21	Australia	QLD1276	EPI_ISL_693277	B.1.177.7	2020-03-21
Australia|VIC252|EPI_ISL_419947|B.1.1.89|2020-03-21	Australia	VIC252	EPI_ISL_419947	B.1.1.89	2020-03-21
Bulgaria|06|EPI_ISL_480297|B.1.1.192|2020-03-21	Bulgaria	6	EPI_ISL_480297	B.1.1.192	2020-03-21
Iceland|1014|EPI_ISL_1586301|B.1.1.162|2020-03-21	Iceland	1014	EPI_ISL_1586301	B.1.1.162	2020-03-21
United_Kingdom|BRIS-121D98|EPI_ISL_440000|B.1.1.270|2020-03-21	United_Kingdom	BRIS-121D98	EPI_ISL_440000	B.1.1.270	2020-03-21
United_Kingdom|CAMB-73141|EPI_ISL_440297|B.1.1.41|2020-03-21	United_Kingdom	CAMB-73141	EPI_ISL_440297	B.1.1.41	2020-03-21
United_Kingdom|NIRE-1020D0|EPI_ISL_441379|B.1.1.83|2020-03-21	United_Kingdom	NIRE-1020D0	EPI_ISL_441379	B.1.1.83	2020-03-21
United_Kingdom|PORT-2D2111|EPI_ISL_611771|B.1.177.20|2020-03-21	United_Kingdom	PORT-2D2111	EPI_ISL_611771	B.1.177.20	2020-03-21
Australia|VIC369|EPI_ISL_426677|B.1.434|2020-03-22	Australia	VIC369	EPI_ISL_426677	B.1.434	2020-03-22
Canada|AB-35896|EPI_ISL_805923|B.1.308|2020-03-22	Canada	AB-35896	EPI_ISL_805923	B.1.308	2020-03-22
Canada|NS-NML-912|EPI_ISL_914979|B.1.1.133|2020-03-22	Canada	NS-NML-912	EPI_ISL_914979	B.1.1.133	2020-03-22
Canada|ON-S1230|EPI_ISL_586305|B.1.1.181|2020-03-22	Canada	ON-S1230	EPI_ISL_586305	B.1.1.181	2020-03-22
Canada|Qc-LSPQ-L00239009|EPI_ISL_536230|B.1.219|2020-03-22	Canada	Qc-LSPQ-L00239009	EPI_ISL_536230	B.1.219	2020-03-22
Italy|VEN-IZSVe-2-2|EPI_ISL_636472|B.1.1|2020-03-22	Italy	VEN-IZSVe-2-2	EPI_ISL_636472	B.1.1	2020-03-22
Kazakhstan|NCB-1|EPI_ISL_435045|B.4.1|2020-03-22	Kazakhstan	NCB-1	EPI_ISL_435045	B.4.1	2020-03-22
Nigeria|NG57839|EPI_ISL_654794|B.1.1.487|2020-03-22	Nigeria	NG57839	EPI_ISL_654794	B.1.1.487	2020-03-22
United_Kingdom|20130069504|EPI_ISL_423656|B.1.258|2020-03-22	United_Kingdom	20130069504	EPI_ISL_423656	B.1.258	2020-03-22
USA|TX-HMH0153|EPI_ISL_434852|B.1.276|2020-03-22	USA	TX-HMH0153	EPI_ISL_434852	B.1.276	2020-03-22
Belgium|FMC-0323159|EPI_ISL_420416|B.1.1.436|2020-03-23	Belgium	FMC-0323159	EPI_ISL_420416	B.1.1.436	2020-03-23
Ecuador|EC-G-2565|EPI_ISL_826805|B.1.1.326|2020-03-23	Ecuador	EC-G-2565	EPI_ISL_826805	B.1.1.326	2020-03-23
Belgium|UGent-11|EPI_ISL_419259|B.11|2020-03-24	Belgium	UGent-11	EPI_ISL_419259	B.11	2020-03-24
Finland|24MS1A6|EPI_ISL_1239429|B.1.1.110|2020-03-24	Finland	24MS1A6	EPI_ISL_1239429	B.1.1.110	2020-03-24
Saudi_Arabia|KAUST-MAKKAH143|EPI_ISL_678229|B.1.260|2020-03-24	Saudi_Arabia	KAUST-MAKKAH143	EPI_ISL_678229	B.1.260	2020-03-24
Spain|AR-IBV-2474|EPI_ISL_468816|B.1.542|2020-03-24	Spain	AR-IBV-2474	EPI_ISL_468816	B.1.542	2020-03-24
United_Kingdom|GCVR-17027D|EPI_ISL_459686|B.1.1.482|2020-03-24	United_Kingdom	GCVR-17027D	EPI_ISL_459686	B.1.1.482	2020-03-24
USA|MN-MDH-1293|EPI_ISL_483013|B.1.330|2020-03-24	USA	MN-MDH-1293	EPI_ISL_483013	B.1.330	2020-03-24
Egypt|CPHL-NRC-18|EPI_ISL_794594|B.1.535|2020-03-25	Egypt	CPHL-NRC-18	EPI_ISL_794594	B.1.535	2020-03-25
Japan|PG-2894|EPI_ISL_691020|B.1.1.285|2020-03-25	Japan	PG-2894	EPI_ISL_691020	B.1.1.285	2020-03-25
New_Zealand|20VR3181|EPI_ISL_579469|B.1.545|2020-03-25	New_Zealand	20VR3181	EPI_ISL_579469	B.1.545	2020-03-25
Saudi_Arabia|KAUST-Jeddah59|EPI_ISL_437496|B.1.471|2020-03-25	Saudi_Arabia	KAUST-Jeddah59	EPI_ISL_437496	B.1.471	2020-03-25
United_Kingdom|CVR702|EPI_ISL_433327|B.1.1.43|2020-03-25	United_Kingdom	CVR702	EPI_ISL_433327	B.1.1.43	2020-03-25
United_Kingdom|PHWC-15C462|EPI_ISL_472490|B.1.1.249|2020-03-26	United_Kingdom	PHWC-15C462	EPI_ISL_472490	B.1.1.249	2020-03-26
Japan|PG-1918|EPI_ISL_685524|B.1.1.48|2020-03-27	Japan	PG-1918	EPI_ISL_685524	B.1.1.48	2020-03-27
Spain|VC-FISABIO-571|EPI_ISL_447502|B.1.1|2020-03-27	Spain	VC-FISABIO-571	EPI_ISL_447502	B.1.1	2020-03-27
United_Kingdom|BRIS-1253DE|EPI_ISL_443943|B.1.167|2020-03-27	United_Kingdom	BRIS-1253DE	EPI_ISL_443943	B.1.167	2020-03-27
USA|OR-PROV-220|EPI_ISL_482455|B.1.161|2020-03-27	USA	OR-PROV-220	EPI_ISL_482455	B.1.161	2020-03-27
Belgium|LL-0328341|EPI_ISL_462195|B.1.1.200|2020-03-28	Belgium	LL-0328341	EPI_ISL_462195	B.1.1.200	2020-03-28
Luxembourg|LNS4530810|EPI_ISL_429770|B.1.143|2020-03-28	Luxembourg	LNS4530810	EPI_ISL_429770	B.1.143	2020-03-28
Poland|PL_P4|EPI_ISL_428927|B.1.187|2020-03-28	Poland	PL_P4	EPI_ISL_428927	B.1.187	2020-03-28
United_Kingdom|GCVR-17176E|EPI_ISL_489620|B.1.248|2020-03-28	United_Kingdom	GCVR-17176E	EPI_ISL_489620	B.1.248	2020-03-28
Belgium|VHEJ-0329357|EPI_ISL_462211|B.1.1.221|2020-03-29	Belgium	VHEJ-0329357	EPI_ISL_462211	B.1.1.221	2020-03-29
Israel|13075703|EPI_ISL_447450|B.1.1.50|2020-03-29	Israel	13075703	EPI_ISL_447450	B.1.1.50	2020-03-29
Portugal|PT1401|EPI_ISL_511360|B.1.1|2020-03-29	Portugal	PT1401	EPI_ISL_511360	B.1.1	2020-03-29
United_Kingdom|SHEF-C03E5|EPI_ISL_420221|B.1.607|2020-03-29	United_Kingdom	SHEF-C03E5	EPI_ISL_420221	B.1.607	2020-03-29
Australia|VIC1192|EPI_ISL_430528|B.1.338|2020-03-30	Australia	VIC1192	EPI_ISL_430528	B.1.338	2020-03-30
Canada|QC-JUS-V6011098|EPI_ISL_889857|B.1.592|2020-03-30	Canada	QC-JUS-V6011098	EPI_ISL_889857	B.1.592	2020-03-30
Iceland|733|EPI_ISL_1586661|B.1|2020-03-30	Iceland	733	EPI_ISL_1586661	B.1	2020-03-30
United_Kingdom|PHWC-2764D|EPI_ISL_432211|B.1.1.363|2020-03-30	United_Kingdom	PHWC-2764D	EPI_ISL_432211	B.1.1.363	2020-03-30
USA|CA-SR0447|EPI_ISL_467971|B.1.552|2020-03-30	USA	CA-SR0447	EPI_ISL_467971	B.1.552	2020-03-30
France|IDF_HB_112003109999|EPI_ISL_940256|B.1.84|2020-03-31	France	IDF_HB_112003109999	EPI_ISL_940256	B.1.84	2020-03-31
India|MH-NIV-QA-710|EPI_ISL_454565|B.1.1.101|2020-03-31	India	MH-NIV-QA-710	EPI_ISL_454565	B.1.1.101	2020-03-31
United_Kingdom|CAMB-7386A|EPI_ISL_425246|B.1.1.398|2020-03-31	United_Kingdom	CAMB-7386A	EPI_ISL_425246	B.1.1.398	2020-03-31
United_Kingdom|CAMB-77990|EPI_ISL_439524|B.1.1.304|2020-03-31	United_Kingdom	CAMB-77990	EPI_ISL_439524	B.1.1.304	2020-03-31
United_Kingdom|EDB5108|EPI_ISL_453188|B.1.9.1|2020-03-31	United_Kingdom	EDB5108	EPI_ISL_453188	B.1.9.1	2020-03-31
United_Kingdom|NORT-289744|EPI_ISL_458605|B.1.1.168|2020-03-31	United_Kingdom	NORT-289744	EPI_ISL_458605	B.1.1.168	2020-03-31
USA|NY-NYCPHL-000123|EPI_ISL_631614|B.1|2020-03-31	USA	NY-NYCPHL-000123	EPI_ISL_631614	B.1	2020-03-31
USA|WA-UW-4582|EPI_ISL_429607|B.1.169|2020-03-31	USA	WA-UW-4582	EPI_ISL_429607	B.1.169	2020-03-31
Germany|BY-MVP-0084|EPI_ISL_437278|B.1|2020-04-01	Germany	BY-MVP-0084	EPI_ISL_437278	B.1	2020-04-01
Netherlands|NA_292|EPI_ISL_422601|B.1.96|2020-04-01	Netherlands	NA_292	EPI_ISL_422601	B.1.96	2020-04-01
Russia|CRIE187963|EPI_ISL_486829|B.1.1.163|2020-04-01	Russia	CRIE187963	EPI_ISL_486829	B.1.1.163	2020-04-01
USA|WY-WYPHL-20007007|EPI_ISL_493063|B.1.301|2020-04-01	USA	WY-WYPHL-20007007	EPI_ISL_493063	B.1.301	2020-04-01
New_Zealand|20VR1914|EPI_ISL_579162|B.1.1|2020-04-02	New_Zealand	20VR1914	EPI_ISL_579162	B.1.1	2020-04-02
United_Kingdom|CAMB-7A14A|EPI_ISL_441289|B.1.1.178|2020-04-02	United_Kingdom	CAMB-7A14A	EPI_ISL_441289	B.1.1.178	2020-04-02
USA|WA-S481|EPI_ISL_434241|B.1.1.26|2020-04-02	USA	WA-S481	EPI_ISL_434241	B.1.1.26	2020-04-02
Israel|13077723|EPI_ISL_447427|B.1.362|2020-04-03	Israel	13077723	EPI_ISL_447427	B.1.362	2020-04-03
United_Kingdom|BRIS-122BAC|EPI_ISL_440738|B.1.198|2020-04-03	United_Kingdom	BRIS-122BAC	EPI_ISL_440738	B.1.198	2020-04-03
United_Kingdom|LEED-2A87C7|EPI_ISL_539017|B.1.110.2|2020-04-03	United_Kingdom	LEED-2A87C7	EPI_ISL_539017	B.1.110.2	2020-04-03
Germany|BE-ChVir-W1078-7878|EPI_ISL_753932|B.1|2020-04-04	Germany	BE-ChVir-W1078-7878	EPI_ISL_753932	B.1	2020-04-04
United_Kingdom|QEUH-9A4506|EPI_ISL_540217|B.1.1.138|2020-04-04	United_Kingdom	QEUH-9A4506	EPI_ISL_540217	B.1.1.138	2020-04-04
Russia|StPetersburg-RII4655S|EPI_ISL_427322|B.1.1.370|2020-04-05	Russia	StPetersburg-RII4655S	EPI_ISL_427322	B.1.1.370	2020-04-05
United_Kingdom|CAMB-7CC38|EPI_ISL_442171|B.1.1.379|2020-04-05	United_Kingdom	CAMB-7CC38	EPI_ISL_442171	B.1.1.379	2020-04-05
Sweden|20-50673|EPI_ISL_475155|B.1.1.261|2020-04-06	Sweden	20-50673	EPI_ISL_475155	B.1.1.261	2020-04-06
USA|IL-LCH-0052|EPI_ISL_1501744|B.1.180|2020-04-06	USA	IL-LCH-0052	EPI_ISL_1501744	B.1.180	2020-04-06
United_Kingdom|PHWC-2A96F|EPI_ISL_445641|B.1.1.360|2020-04-07	United_Kingdom	PHWC-2A96F	EPI_ISL_445641	B.1.1.360	2020-04-07
USA|CA-CZB-10156|EPI_ISL_672235|B.1.403|2020-04-07	USA	CA-CZB-10156	EPI_ISL_672235	B.1.403	2020-04-07
USA|FL-BPHL-0656|EPI_ISL_508860|B.1.493|2020-04-07	USA	FL-BPHL-0656	EPI_ISL_508860	B.1.493	2020-04-07
USA|TX-DSHS-0225|EPI_ISL_525784|B.1.1.244|2020-04-07	USA	TX-DSHS-0225	EPI_ISL_525784	B.1.1.244	2020-04-07
Italy|LAZ-AMC-2004088031-DS|EPI_ISL_1854982|B.1.1.58|2020-04-08	Italy	LAZ-AMC-2004088031-DS	EPI_ISL_1854982	B.1.1.58	2020-04-08
India|WB-IK62|EPI_ISL_511903|B.1.206|2020-04-09	India	WB-IK62	EPI_ISL_511903	B.1.206	2020-04-09
United_Kingdom|CAMB-7ACC1|EPI_ISL_433864|B.1.1|2020-04-09	United_Kingdom	CAMB-7ACC1	EPI_ISL_433864	B.1.1	2020-04-09
United_Kingdom|CAMB-7AEAD|EPI_ISL_433888|B.1.1.197|2020-04-09	United_Kingdom	CAMB-7AEAD	EPI_ISL_433888	B.1.1.197	2020-04-09
Russia|Moscow_PMVL-10|EPI_ISL_470903|B.1.1.500|2020-04-10	Russia	Moscow_PMVL-10	EPI_ISL_470903	B.1.1.500	2020-04-10
Sierra_Leone|KGH-G-8625|EPI_ISL_512816|A.12|2020-04-10	Sierra_Leone	KGH-G-8625	EPI_ISL_512816	A.12	2020-04-10
USA|MN-MDH-1768|EPI_ISL_590772|B.1.596|2020-04-11	USA	MN-MDH-1768	EPI_ISL_590772	B.1.596	2020-04-11
Spain|PV-IBV-2137|EPI_ISL_468885|B.1.1|2020-04-12	Spain	PV-IBV-2137	EPI_ISL_468885	B.1.1	2020-04-12
United_Kingdom|NIRE-FC368|EPI_ISL_470028|B.1.1.148|2020-04-12	United_Kingdom	NIRE-FC368	EPI_ISL_470028	B.1.1.148	2020-04-12
United_Kingdom|NOTT-110330|EPI_ISL_441501|B.1.1.55|2020-04-12	United_Kingdom	NOTT-110330	EPI_ISL_441501	B.1.1.55	2020-04-12
Australia|NSW601|EPI_ISL_478713|B.1|2020-04-13	Australia	NSW601	EPI_ISL_478713	B.1	2020-04-13
USA|MN-MDH-1774|EPI_ISL_590777|B.1.382|2020-04-13	USA	MN-MDH-1774	EPI_ISL_590777	B.1.382	2020-04-13
South_Africa|NHLS-UCT-GP-5021|EPI_ISL_640097|B.1.1.34|2020-04-15	South_Africa	NHLS-UCT-GP-5021	EPI_ISL_640097	B.1.1.34	2020-04-15
United_Kingdom|SHEF-C16DC|EPI_ISL_432729|B.1.1|2020-04-15	United_Kingdom	SHEF-C16DC	EPI_ISL_432729	B.1.1	2020-04-15
United_Kingdom|EDB1832|EPI_ISL_433152|B.1|2020-04-16	United_Kingdom	EDB1832	EPI_ISL_433152	B.1	2020-04-16
USA|AZ-TG724354|EPI_ISL_1113468|B.1.445|2020-04-17	USA	AZ-TG724354	EPI_ISL_1113468	B.1.445	2020-04-17
USA|MA-MASPHL-00271|EPI_ISL_791703|B.1.1.335|2020-04-17	USA	MA-MASPHL-00271	EPI_ISL_791703	B.1.1.335	2020-04-17
USA|FL-BPHL-1986|EPI_ISL_653139|B.1.509|2020-04-18	USA	FL-BPHL-1986	EPI_ISL_653139	B.1.509	2020-04-18
USA|NH-Yale-1640|EPI_ISL_1168366|B.1.443|2020-04-18	USA	NH-Yale-1640	EPI_ISL_1168366	B.1.443	2020-04-18
USA|VA-DCLS-0684|EPI_ISL_500846|B.1.451|2020-04-18	USA	VA-DCLS-0684	EPI_ISL_500846	B.1.451	2020-04-18
USA|MO-MSPHL-000515|EPI_ISL_1392875|B.1.377|2020-04-19	USA	MO-MSPHL-000515	EPI_ISL_1392875	B.1.377	2020-04-19
Denmark|DCGC-6742|EPI_ISL_622356|A.15|2020-04-20	Denmark	DCGC-6742	EPI_ISL_622356	A.15	2020-04-20
Finland|20A16S7|EPI_ISL_481595|B.1.490|2020-04-20	Finland	20A16S7	EPI_ISL_481595	B.1.490	2020-04-20
Russia|StPetersburg-RII7520S|EPI_ISL_450256|B.1.1.127|2020-04-20	Russia	StPetersburg-RII7520S	EPI_ISL_450256	B.1.1.127	2020-04-20
USA|CO-CDPHE-2004220732|EPI_ISL_710184|B.1.492|2020-04-20	USA	CO-CDPHE-2004220732	EPI_ISL_710184	B.1.492	2020-04-20
USA|NY-Wadsworth-57118-01|EPI_ISL_525686|B.1.506|2020-04-20	USA	NY-Wadsworth-57118-01	EPI_ISL_525686	B.1.506	2020-04-20
Equatorial_Guinea|2426|EPI_ISL_648316|B.1.192|2020-04-21	Equatorial_Guinea	2426	EPI_ISL_648316	B.1.192	2020-04-21
India|GJ-GBRC9|EPI_ISL_435056|B.1.145|2020-04-21	India	GJ-GBRC9	EPI_ISL_435056	B.1.145	2020-04-21
Poland|Pom5|EPI_ISL_451646|C.10|2020-04-22	Poland	Pom5	EPI_ISL_451646	C.10	2020-04-22
United_Kingdom|EDB4335|EPI_ISL_453122|B.1.168|2020-04-23	United_Kingdom	EDB4335	EPI_ISL_453122	B.1.168	2020-04-23
USA|UT-UPHL-02807|EPI_ISL_575081|B.1.106|2020-04-23	USA	UT-UPHL-02807	EPI_ISL_575081	B.1.106	2020-04-23
Belarus|MI-RII-MH11337S|EPI_ISL_754229|B.1.164|2020-04-24	Belarus	MI-RII-MH11337S	EPI_ISL_754229	B.1.164	2020-04-24
USA|AZ-TG280883|EPI_ISL_694212|B.1.1|2020-04-24	USA	AZ-TG280883	EPI_ISL_694212	B.1.1	2020-04-24
USA|Navy-CDC-3539679-001|EPI_ISL_514090|B.1.1|2020-04-24	USA	Navy-CDC-3539679-001	EPI_ISL_514090	B.1.1	2020-04-24
USA|MA-MASPHL-00406|EPI_ISL_693142|B.1|2020-04-25	USA	MA-MASPHL-00406	EPI_ISL_693142	B.1	2020-04-25
USA|WA-UW-8165|EPI_ISL_570200|B.1.341|2020-04-25	USA	WA-UW-8165	EPI_ISL_570200	B.1.341	2020-04-25
United_Kingdom|MILK-482D1A|EPI_ISL_559696|B.1.1.217|2020-04-26	United_Kingdom	MILK-482D1A	EPI_ISL_559696	B.1.1.217	2020-04-26
USA|TX-HMH-1172|EPI_ISL_542563|B.1.572|2020-04-26	USA	TX-HMH-1172	EPI_ISL_542563	B.1.572	2020-04-26
USA|NC-QDX-171|EPI_ISL_494523|B.1.498|2020-04-27	USA	NC-QDX-171	EPI_ISL_494523	B.1.498	2020-04-27
USA|TX-QDX-188|EPI_ISL_494543|B.1.366|2020-04-27	USA	TX-QDX-188	EPI_ISL_494543	B.1.366	2020-04-27
USA|WA-S904|EPI_ISL_463394|B.1.1.291|2020-04-27	USA	WA-S904	EPI_ISL_463394	B.1.1.291	2020-04-27
Sweden|20-14090|EPI_ISL_450828|B.1.1.91|2020-04-28	Sweden	20-14090	EPI_ISL_450828	B.1.1.91	2020-04-28
USA|CA-CDPH041|EPI_ISL_754930|B.1.508|2020-04-28	USA	CA-CDPH041	EPI_ISL_754930	B.1.508	2020-04-28
Egypt|MASRI-014|EPI_ISL_482765|B.1.466|2020-04-30	Egypt	MASRI-014	EPI_ISL_482765	B.1.466	2020-04-30
United_Kingdom|BRIS-12ACFC|EPI_ISL_458367|B.1.165|2020-05-01	United_Kingdom	BRIS-12ACFC	EPI_ISL_458367	B.1.165	2020-05-01
United_Kingdom|NOTT-11152A|EPI_ISL_457576|B.1.1.149|2020-05-01	United_Kingdom	NOTT-11152A	EPI_ISL_457576	B.1.1.149	2020-05-01
Russia|SAR-RARI-3573|EPI_ISL_678283|B.1.1.424|2020-05-02	Russia	SAR-RARI-3573	EPI_ISL_678283	B.1.1.424	2020-05-02
USA|TX-HMH-1371|EPI_ISL_542678|B.1.511|2020-05-02	USA	TX-HMH-1371	EPI_ISL_542678	B.1.511	2020-05-02
USA|UT-UPHL-03046|EPI_ISL_560897|B.1.554|2020-05-02	USA	UT-UPHL-03046	EPI_ISL_560897	B.1.554	2020-05-02
India|GJ-GBRC53|EPI_ISL_444484|B.1.247|2020-05-04	India	GJ-GBRC53	EPI_ISL_444484	B.1.247	2020-05-04
USA|VA-DCLS-0824|EPI_ISL_516698|B.1.1.447|2020-05-05	USA	VA-DCLS-0824	EPI_ISL_516698	B.1.1.447	2020-05-05
United_Kingdom|ALDP-9EDBD2|EPI_ISL_580650|B.1.1.253|2020-05-09	United_Kingdom	ALDP-9EDBD2	EPI_ISL_580650	B.1.1.253	2020-05-09
Poland|PL_MCB_72|EPI_ISL_645071|B.1.213|2020-05-10	Poland	PL_MCB_72	EPI_ISL_645071	B.1.213	2020-05-10
USA|NY-MSHSPSP-PV25014|EPI_ISL_1707400|B.1.1.222|2020-05-10	USA	NY-MSHSPSP-PV25014	EPI_ISL_1707400	B.1.1.222	2020-05-10
USA|AZ-TG779998|EPI_ISL_1465065|B.1.1.222|2020-05-11	USA	AZ-TG779998	EPI_ISL_1465065	B.1.1.222	2020-05-11
USA|TX-HMH-2050|EPI_ISL_545087|B.1.1.118|2020-05-11	USA	TX-HMH-2050	EPI_ISL_545087	B.1.1.118	2020-05-11
Romania|283584|EPI_ISL_455469|B.1.408|2020-05-12	Romania	283584	EPI_ISL_455469	B.1.408	2020-05-12
USA|CA-CZB-2341|EPI_ISL_513791|B.1.452|2020-05-12	USA	CA-CZB-2341	EPI_ISL_513791	B.1.452	2020-05-12
USA|AZ-TG668340|EPI_ISL_696265|B.1.1.228|2020-05-13	USA	AZ-TG668340	EPI_ISL_696265	B.1.1.228	2020-05-13
USA|AZ-TG668341|EPI_ISL_696266|B.1.313|2020-05-13	USA	AZ-TG668341	EPI_ISL_696266	B.1.313	2020-05-13
Russia|OMS-ORINFI-7121S|EPI_ISL_569742|B.1.1.506|2020-05-14	Russia	OMS-ORINFI-7121S	EPI_ISL_569742	B.1.1.506	2020-05-14
United_Kingdom|QEUH-544733|EPI_ISL_533364|B.1.238|2020-05-14	United_Kingdom	QEUH-544733	EPI_ISL_533364	B.1.238	2020-05-14
Turkey|HSGM-2004082|EPI_ISL_814089|B.1.1.138|2020-05-15	Turkey	HSGM-2004082	EPI_ISL_814089	B.1.1.138	2020-05-15
Argentina|PAIS-F0040|EPI_ISL_981038|B.1.1.442|2020-05-16	Argentina	PAIS-F0040	EPI_ISL_981038	B.1.1.442	2020-05-16
United_Kingdom|SHEF-10B2E79|EPI_ISL_537248|B.1.173|2020-05-16	United_Kingdom	SHEF-10B2E79	EPI_ISL_537248	B.1.173	2020-05-16
Nigeria|BO-CV347|EPI_ISL_730012|B.1.467|2020-05-17	Nigeria	BO-CV347	EPI_ISL_730012	B.1.467	2020-05-17
USA|MA-MGH-03932|EPI_ISL_1011533|B.1.1.316|2020-05-17	USA	MA-MGH-03932	EPI_ISL_1011533	B.1.1.316	2020-05-17
United_Kingdom|LIVE-A3E9C|EPI_ISL_499956|B.1.1.95|2020-05-18	United_Kingdom	LIVE-A3E9C	EPI_ISL_499956	B.1.1.95	2020-05-18
United_Kingdom|SHEF-C80F5|EPI_ISL_529433|B.1.1.86|2020-05-19	United_Kingdom	SHEF-C80F5	EPI_ISL_529433	B.1.1.86	2020-05-19
USA|TX-DSHS-0912|EPI_ISL_602210|B.1.599|2020-05-20	USA	TX-DSHS-0912	EPI_ISL_602210	B.1.599	2020-05-20
South_Africa|KRISP-0143|EPI_ISL_467493|B.1.1.56|2020-05-21	South_Africa	KRISP-0143	EPI_ISL_467493	B.1.1.56	2020-05-21
United_Kingdom|BIRM-5FC59|EPI_ISL_473392|B.1.1.255|2020-05-21	United_Kingdom	BIRM-5FC59	EPI_ISL_473392	B.1.1.255	2020-05-21
USA|OR-PROV-535|EPI_ISL_1017469|B.1.357|2020-05-21	USA	OR-PROV-535	EPI_ISL_1017469	B.1.357	2020-05-21
USA|UT-UPHL-04478|EPI_ISL_525343|B.1.444|2020-05-21	USA	UT-UPHL-04478	EPI_ISL_525343	B.1.444	2020-05-21
Chile|RM-72850|EPI_ISL_746784|B.1.1.324|2020-05-22	Chile	RM-72850	EPI_ISL_746784	B.1.1.324	2020-05-22
United_Kingdom|ALDP-49F3BE|EPI_ISL_559611|B.1.1.45|2020-05-22	United_Kingdom	ALDP-49F3BE	EPI_ISL_559611	B.1.1.45	2020-05-22
USA|TX-HMH-3036|EPI_ISL_543949|B.1.1.230|2020-05-22	USA	TX-HMH-3036	EPI_ISL_543949	B.1.1.230	2020-05-22
Australia|WA189|EPI_ISL_596752|B.1.36.33|2020-05-23	Australia	WA189	EPI_ISL_596752	B.1.36.33	2020-05-23
Czech_Republic|NRL-6834|EPI_ISL_541333|B.1.1.266|2020-05-23	Czech_Republic	NRL-6834	EPI_ISL_541333	B.1.1.266	2020-05-23
Sweden|20-51697|EPI_ISL_510834|B.1.342|2020-05-23	Sweden	20-51697	EPI_ISL_510834	B.1.342	2020-05-23
India|TG-CCMB-GC1|EPI_ISL_528810|B.1.537|2020-05-24	India	TG-CCMB-GC1	EPI_ISL_528810	B.1.537	2020-05-24
Ghana|84182_S43|EPI_ISL_515104|B.1.1.404|2020-05-25	Ghana	84182_S43	EPI_ISL_515104	B.1.1.404	2020-05-25
Japan|PG-7972|EPI_ISL_687073|B.1.1|2020-05-26	Japan	PG-7972	EPI_ISL_687073	B.1.1	2020-05-26
USA|IL-IDPH-DEK-S-000843|EPI_ISL_1652426|B.1.305|2020-05-27	USA	IL-IDPH-DEK-S-000843	EPI_ISL_1652426	B.1.305	2020-05-27
Costa_Rica|HNN-0359|EPI_ISL_1517403|B.1.291|2020-05-31	Costa_Rica	HNN-0359	EPI_ISL_1517403	B.1.291	2020-05-31
Nigeria|NA-CV240|EPI_ISL_729926|B.1.1.484|2020-05-31	Nigeria	NA-CV240	EPI_ISL_729926	B.1.1.484	2020-05-31
USA|NM-UNM-TC240018|EPI_ISL_2222591|B.1.1.222|2020-06-08	USA	NM-UNM-TC240018	EPI_ISL_2222591	B.1.1.222	2020-06-08
USA|CO-CDPHE-2008022196|EPI_ISL_5848051|B.1.570|2020-07-30	USA	CO-CDPHE-2008022196	EPI_ISL_5848051	B.1.570	2020-07-30
Brazil|SP-1632|EPI_ISL_1171632|B.1.1.519|2021-01-11	Brazil	SP-1632	EPI_ISL_1171632	B.1.1.519	2021-01-11
India|MH-NCCS-154558|EPI_ISL_1384826|B.1.1.306|2021-01-12	India	MH-NCCS-154558	EPI_ISL_1384826	B.1.1.306	2021-01-12
Brazil|SP-IB_103245|EPI_ISL_2346062|B.1.1.519|2021-01-22	Brazil	SP-IB_103245	EPI_ISL_2346062	B.1.1.519	2021-01-22
Brazil|SP-HIAE-ID052|EPI_ISL_977500|B.1.1.519|2021-01-28	Brazil	SP-HIAE-ID052	EPI_ISL_977500	B.1.1.519	2021-01-28
Brazil|RJ-FIOCRUZ-5288|EPI_ISL_2614217|B.1.1.519|2021-02-10	Brazil	RJ-FIOCRUZ-5288	EPI_ISL_2614217	B.1.1.519	2021-02-10
Indonesia|JK-NIHRD-C00-21-24581|EPI_ISL_1118207|B.1.1.519|2021-02-11	Indonesia	JK-NIHRD-C00-21-24581	EPI_ISL_1118207	B.1.1.519	2021-02-11
Indonesia|BA-EIJK-UNWAR-408|EPI_ISL_3030037|B.1.1.519|2021-02-24	Indonesia	BA-EIJK-UNWAR-408	EPI_ISL_3030037	B.1.1.519	2021-02-24
Indonesia|JB-GS-WJHL-ITB-GS-211|EPI_ISL_7472555|B.1.1.519|2021-03-24	Indonesia	JB-GS-WJHL-ITB-GS-211	EPI_ISL_7472555	B.1.1.519	2021-03-24
Indonesia|JB-GS-WJHL-ITB-GS-215|EPI_ISL_7472559|B.1.1.519|2021-03-24	Indonesia	JB-GS-WJHL-ITB-GS-215	EPI_ISL_7472559	B.1.1.519	2021-03-24
Indonesia|JK-EIJK0657|EPI_ISL_2614724|B.1.1.519|2021-05-22	Indonesia	JK-EIJK0657	EPI_ISL_2614724	B.1.1.519	2021-05-22
Indonesia|KU-NIHRD-WGS09986|EPI_ISL_4254848|B.1.1.519|2021-07-26	Indonesia	KU-NIHRD-WGS09986	EPI_ISL_4254848	B.1.1.519	2021-07-26

## Sheet: B_1_1_222
Name	Country	ID	GSAID	Lineage	Date
Wuhan|IPBCAMS-WH-01/2019|EPI_ISL_402123|2019-12-24	Wuhan	IPBCAMS-WH-01/2019	EPI_ISL_402123	ROOT	2019-12-24
Wuhan|WH01/2019|EPI_ISL_406798|2019-12-26	Wuhan	WH01/2019	EPI_ISL_406798	ROOT	2019-12-26
Wuhan|IVDC-HB-01/2019|EPI_ISL_402119|2019-12-30	Wuhan	IVDC-HB-01/2019	EPI_ISL_402119	ROOT	2019-12-30
Wuhan|IPBCAMS-WH-02/2019|EPI_ISL_403931|2019-12-30	Wuhan	IPBCAMS-WH-02/2019	EPI_ISL_403931	ROOT	2019-12-30
Wuhan|IVDC-HB-05/2019|EPI_ISL_402121|2019-12-30	Wuhan	IVDC-HB-05/2019	EPI_ISL_402121	ROOT	2019-12-30
Wuhan|IME-WH01/2019|EPI_ISL_529213|2019-12-30	Wuhan	IME-WH01/2019	EPI_ISL_529213	ROOT	2019-12-30
Wuhan|IPBCAMS-WH-03/2019|EPI_ISL_403930|2019-12-30	Wuhan	IPBCAMS-WH-03/2019	EPI_ISL_403930	ROOT	2019-12-30
Wuhan|WIV05/2019|EPI_ISL_402128|2019-12-30	Wuhan	WIV05/2019	EPI_ISL_402128	ROOT	2019-12-30
Wuhan|WIV02/2019|EPI_ISL_402127|2019-12-30	Wuhan	WIV02/2019	EPI_ISL_402127	ROOT	2019-12-30
Wuhan|HBCDC-HB-02/2019|EPI_ISL_412898|2019-12-30	Wuhan	HBCDC-HB-02/2019	EPI_ISL_412898	ROOT	2019-12-30
Wuhan|IVDC-HB-GX02/2019|EPI_ISL_434534|2019-12-30	Wuhan	IVDC-HB-GX02/2019	EPI_ISL_434534	ROOT	2019-12-30
Wuhan|IME-WH03/2019|EPI_ISL_529215|2019-12-30	Wuhan	IME-WH03/2019	EPI_ISL_529215	ROOT	2019-12-30
Wuhan|WIV07/2019|EPI_ISL_402130|2019-12-30	Wuhan	WIV07/2019	EPI_ISL_402130	ROOT	2019-12-30
Wuhan|HBCDC-HB-01/2019|EPI_ISL_402132|2019-12-30	Wuhan	HBCDC-HB-01/2019	EPI_ISL_402132	ROOT	2019-12-30
Wuhan|IPBCAMS-WH-04/2019|EPI_ISL_403929|2019-12-30	Wuhan	IPBCAMS-WH-04/2019	EPI_ISL_403929	ROOT	2019-12-30
Wuhan|WIV04/2019|EPI_ISL_402124|2019-12-30	Wuhan	WIV04/2019	EPI_ISL_402124	ROOT	2019-12-30
Wuhan|IME-WH02/2019|EPI_ISL_529214|2019-12-30	Wuhan	IME-WH02/2019	EPI_ISL_529214	ROOT	2019-12-30
Wuhan|HBCDC-HB-03/2019|EPI_ISL_412899|2019-12-30	Wuhan	HBCDC-HB-03/2019	EPI_ISL_412899	ROOT	2019-12-30
Wuhan|IME-WH04/2019|EPI_ISL_529216|2019-12-30	Wuhan	IME-WH04/2019	EPI_ISL_529216	ROOT	2019-12-30
Wuhan|IME-WH05/2019|EPI_ISL_529217|2019-12-30	Wuhan	IME-WH05/2019	EPI_ISL_529217	ROOT	2019-12-30
Wuhan|WIV06/2019|EPI_ISL_402129|2019-12-30	Wuhan	WIV06/2019	EPI_ISL_402129	ROOT	2019-12-30
Wuhan|Hu-1/2019|EPI_ISL_402125|2019-12-31	Wuhan	Hu-1/2019	EPI_ISL_402125	ROOT	2019-12-31
Wuhan|IVDC-HB-04/2020|EPI_ISL_402120|2020-01-01	Wuhan	IVDC-HB-04/2020	EPI_ISL_402120	ROOT	2020-01-01
Wuhan|IPBCAMS-WH-05/2020|EPI_ISL_403928|2020-01-01	Wuhan	IPBCAMS-WH-05/2020	EPI_ISL_403928	ROOT	2020-01-01
Wuhan|WH03/2020|EPI_ISL_406800|2020-01-01	Wuhan	WH03/2020	EPI_ISL_406800	ROOT	2020-01-01
Argentina|PAIS-A1026/2020|EPI_ISL_4405694|2020-01-01	Argentina	PAIS-A1026/2020	EPI_ISL_4405694	ROOT	2020-01-01
France|20_B./2020|EPI_ISL_4537783|2020-01-01	France	20_B./2020	EPI_ISL_4537783	ROOT	2020-01-01
India|MH-NCCS-154558|EPI_ISL_1384826|B.1.1.306|2020-01-12	India	MH-NCCS-154558	EPI_ISL_1384826	B.1.1.306	2020-01-12
Zhejiang|HZ103|EPI_ISL_422425|B.1|2020-01-24	Zhejiang	HZ103	EPI_ISL_422425	B.1	2020-01-24
Sichuan|SC-PHCC1-022|EPI_ISL_451345|B.1.153|2020-01-24	Sichuan	SC-PHCC1-022	EPI_ISL_451345	B.1.153	2020-01-24
Wuhan|AP8|EPI_ISL_1655937|A.17|2020-01-25	Wuhan	AP8	EPI_ISL_1655937	A.17	2020-01-25
HongKong|HKU-200723-004|EPI_ISL_497771|B.42|2020-01-29	HongKong	HKU-200723-004	EPI_ISL_497771	B.42	2020-01-29
HongKong|HKPU23-2601|EPI_ISL_417183|B.43|2020-01-30	HongKong	HKPU23-2601	EPI_ISL_417183	B.43	2020-01-30
Panama|GMI-PA352445|EPI_ISL_1225382|A.2.4|2020-02-04	Panama	GMI-PA352445	EPI_ISL_1225382	A.2.4	2020-02-04
Spain|MD-IBV-99018532|EPI_ISL_1014733|B.1.177|2020-02-14	Spain	MD-IBV-99018532	EPI_ISL_1014733	B.1.177	2020-02-14
UnitedArabEmira|L0184|EPI_ISL_435121|B.4.6|2020-02-25	UnitedArabEmira	L0184	EPI_ISL_435121	B.4.6	2020-02-25
France|BRE-1623|EPI_ISL_418219|B.1.36.10|2020-02-26	France	BRE-1623	EPI_ISL_418219	B.1.36.10	2020-02-26
Netherlands|Tilburg-1363354|EPI_ISL_413586|B.11|2020-02-27	Netherlands	Tilburg-1363354	EPI_ISL_413586	B.11	2020-02-27
Spain|IB-IBV-99007264|EPI_ISL_541968|B.1.1.44|2020-02-28	Spain	IB-IBV-99007264	EPI_ISL_541968	B.1.1.44	2020-02-28
Senegal|3|EPI_ISL_418206|B.1.356|2020-02-28	Senegal	3	EPI_ISL_418206	B.1.356	2020-02-28
England|201061454|EPI_ISL_464412|B.1.1.323|2020-02-29	England	201061454	EPI_ISL_464412	B.1.1.323	2020-02-29
USA|GA-2742|EPI_ISL_419557|B.1.1.61|2020-02-29	USA	GA-2742	EPI_ISL_419557	B.1.1.61	2020-02-29
Kazakhstan|124921|EPI_ISL_1335803|B.1.1.136|2020-03-01	Kazakhstan	124921	EPI_ISL_1335803	B.1.1.136	2020-03-01
Brazil|RJ-IC0102020-158-20|EPI_ISL_1739298|B.1.1.33|2020-03-01	Brazil	RJ-IC0102020-158-20	EPI_ISL_1739298	B.1.1.33	2020-03-01
Zimbabwe|ZW-25|EPI_ISL_647977|B.1.446|2020-03-01	Zimbabwe	ZW-25	EPI_ISL_647977	B.1.446	2020-03-01
Belgium|VI-03027|EPI_ISL_417427|B.1.1.319|2020-03-02	Belgium	VI-03027	EPI_ISL_417427	B.1.1.319	2020-03-02
USA|NMDOH-2021083688|EPI_ISL_1805336|B.1.427|2020-03-02	USA	NMDOH-2021083688	EPI_ISL_1805336	B.1.427	2020-03-02
England|NORT-2A6222|EPI_ISL_507128|B.57|2020-03-02	England	NORT-2A6222	EPI_ISL_507128	B.57	2020-03-02
England|20108006603|EPI_ISL_417253|B.27|2020-03-03	England	20108006603	EPI_ISL_417253	B.27	2020-03-03
Italy|VEN-SI-104|EPI_ISL_1181779|B.1.1.161|2020-03-04	Italy	VEN-SI-104	EPI_ISL_1181779	B.1.1.161	2020-03-04
Finland|13M33|EPI_ISL_418390|B.1.158|2020-03-04	Finland	13M33	EPI_ISL_418390	B.1.158	2020-03-04
France|HDF-1993|EPI_ISL_414637|B.1.277|2020-03-04	France	HDF-1993	EPI_ISL_414637	B.1.277	2020-03-04
Italy|LOM-UniMI-L343|EPI_ISL_542282|B.1.380|2020-03-04	Italy	LOM-UniMI-L343	EPI_ISL_542282	B.1.380	2020-03-04
Netherlands|NoordBrabant-21|EPI_ISL_414530|B.1.8|2020-03-04	Netherlands	NoordBrabant-21	EPI_ISL_414530	B.1.8	2020-03-04
England|201061034|EPI_ISL_464404|B.58|2020-03-04	England	201061034	EPI_ISL_464404	B.58	2020-03-04
Brazil|SP-14|EPI_ISL_416036|B.1.1.28|2020-03-05	Brazil	SP-14	EPI_ISL_416036	B.1.1.28	2020-03-05
Netherlands|GE-EMC-217|EPI_ISL_523199|B.1.22|2020-03-05	Netherlands	GE-EMC-217	EPI_ISL_523199	B.1.22	2020-03-05
Singapore|27|EPI_ISL_420104|B.35|2020-03-05	Singapore	27	EPI_ISL_420104	B.35	2020-03-05
Iceland|62|EPI_ISL_417757|B.1.1.17|2020-03-06	Iceland	62	EPI_ISL_417757	B.1.1.17	2020-03-06
Italy|UMB-ISS-3867|EPI_ISL_856906|B.1.1.70|2020-03-06	Italy	UMB-ISS-3867	EPI_ISL_856906	B.1.1.70	2020-03-06
England|20109028804|EPI_ISL_464549|B.1.201|2020-03-06	England	20109028804	EPI_ISL_464549	B.1.201	2020-03-06
France|ARA-06531|EPI_ISL_416756|B.1.387|2020-03-06	France	ARA-06531	EPI_ISL_416756	B.1.387	2020-03-06
England|20109098906|EPI_ISL_417296|B.47|2020-03-06	England	20109098906	EPI_ISL_417296	B.47	2020-03-06
Italy|VEN-SI-139|EPI_ISL_1181818|B.1.1.204|2020-03-07	Italy	VEN-SI-139	EPI_ISL_1181818	B.1.1.204	2020-03-07
Belgium|HC-030760|EPI_ISL_420451|B.1.1.371|2020-03-07	Belgium	HC-030760	EPI_ISL_420451	B.1.1.371	2020-03-07
England|LIVE-DCA612|EPI_ISL_724371|B.1.177.50|2020-03-07	England	LIVE-DCA612	EPI_ISL_724371	B.1.177.50	2020-03-07
Iceland|63|EPI_ISL_417855|B.1.510|2020-03-07	Iceland	63	EPI_ISL_417855	B.1.510	2020-03-07
Belgium|ULG-3683|EPI_ISL_417011|B.38|2020-03-07	Belgium	ULG-3683	EPI_ISL_417011	B.38	2020-03-07
Australia|SA0633|EPI_ISL_1229177|B.1.36.31|2020-03-08	Australia	SA0633	EPI_ISL_1229177	B.1.36.31	2020-03-08
England|201141581|EPI_ISL_464766|B.1.1.171|2020-03-09	England	201141581	EPI_ISL_464766	B.1.1.171	2020-03-09
Denmark|DCGC-991|EPI_ISL_614581|B.1.118|2020-03-09	Denmark	DCGC-991	EPI_ISL_614581	B.1.118	2020-03-09
Denmark|DCGC-961|EPI_ISL_614557|B.1.179|2020-03-09	Denmark	DCGC-961	EPI_ISL_614557	B.1.179	2020-03-09
England|201140778|EPI_ISL_464741|B.1.249|2020-03-09	England	201140778	EPI_ISL_464741	B.1.249	2020-03-09
Denmark|DCGC-979|EPI_ISL_614577|B.1.39|2020-03-09	Denmark	DCGC-979	EPI_ISL_614577	B.1.39	2020-03-09
USA|RI-0882|EPI_ISL_426435|B.1.590|2020-03-09	USA	RI-0882	EPI_ISL_426435	B.1.590	2020-03-09
USA|LA-0842|EPI_ISL_424868|B.1.595|2020-03-09	USA	LA-0842	EPI_ISL_424868	B.1.595	2020-03-09
Australia|VIC1703|EPI_ISL_456588|B.4.5|2020-03-09	Australia	VIC1703	EPI_ISL_456588	B.4.5	2020-03-09
India|MH-ICMR-C300|EPI_ISL_1055383|B.1.210|2020-03-10	India	MH-ICMR-C300	EPI_ISL_1055383	B.1.210	2020-03-10
USA|MD-HP00076|EPI_ISL_438234|A.3|2020-03-11	USA	MD-HP00076	EPI_ISL_438234	A.3	2020-03-11
Greece|136|EPI_ISL_434473|B.1.1.16|2020-03-11	Greece	136	EPI_ISL_434473	B.1.1.16	2020-03-11
England|LIVE-A4B49|EPI_ISL_500074|B.1.1.372|2020-03-11	England	LIVE-A4B49	EPI_ISL_500074	B.1.1.372	2020-03-11
Switzerland|BS-UHB-42185807|EPI_ISL_530122|B.1.287|2020-03-11	Switzerland	BS-UHB-42185807	EPI_ISL_530122	B.1.287	2020-03-11
Finland|11MS2F2|EPI_ISL_1218651|B.1.335|2020-03-11	Finland	11MS2F2	EPI_ISL_1218651	B.1.335	2020-03-11
Sweden|20-05444|EPI_ISL_445221|B.1.555|2020-03-11	Sweden	20-05444	EPI_ISL_445221	B.1.555	2020-03-11
USA|OH-ODH-SC149737|EPI_ISL_1165135|B.1.564|2020-03-11	USA	OH-ODH-SC149737	EPI_ISL_1165135	B.1.564	2020-03-11
Malaysia|NPHL-19269|EPI_ISL_2001645|B.6.6|2020-03-11	Malaysia	NPHL-19269	EPI_ISL_2001645	B.6.6	2020-03-11
England|20118179304|EPI_ISL_465000|B.1.1.117|2020-03-12	England	20118179304	EPI_ISL_465000	B.1.1.117	2020-03-12
Sweden|20-50299|EPI_ISL_475129|B.1.1.135|2020-03-12	Sweden	20-50299	EPI_ISL_475129	B.1.1.135	2020-03-12
England|201160037|EPI_ISL_464779|B.1.250|2020-03-12	England	201160037	EPI_ISL_464779	B.1.250	2020-03-12
France|HDF-2405|EPI_ISL_418228|B.1.354|2020-03-12	France	HDF-2405	EPI_ISL_418228	B.1.354	2020-03-12
USA|UT-QDX-2230|EPI_ISL_604591|B.1.413|2020-03-12	USA	UT-QDX-2230	EPI_ISL_604591	B.1.413	2020-03-12
USA|NY-QDX-87|EPI_ISL_468582|B.1.586|2020-03-12	USA	NY-QDX-87	EPI_ISL_468582	B.1.586	2020-03-12
England|BRIS-1309ED|EPI_ISL_492694|B.10|2020-03-12	England	BRIS-1309ED	EPI_ISL_492694	B.10	2020-03-12
England|20129154104|EPI_ISL_424118|B.52|2020-03-12	England	20129154104	EPI_ISL_424118	B.52	2020-03-12
Beijing|DT-travelNO01|EPI_ISL_452342|B.6.7|2020-03-12	Beijing	DT-travelNO01	EPI_ISL_452342	B.6.7	2020-03-12
USA|WI-UW-22|EPI_ISL_417514|A.4|2020-03-13	USA	WI-UW-22	EPI_ISL_417514	A.4	2020-03-13
Switzerland|BS-UHB-42189582|EPI_ISL_528046|B.1.128|2020-03-13	Switzerland	BS-UHB-42189582	EPI_ISL_528046	B.1.128	2020-03-13
USA|NY-PV08125|EPI_ISL_421354|B.1.314|2020-03-13	USA	NY-PV08125	EPI_ISL_421354	B.1.314	2020-03-13
Beijing|DT-travelAT01|EPI_ISL_452327|B.1.350|2020-03-13	Beijing	DT-travelAT01	EPI_ISL_452327	B.1.350	2020-03-13
Canada|QC-LSPQ-L00217574|EPI_ISL_535765|B.1.547|2020-03-13	Canada	QC-LSPQ-L00217574	EPI_ISL_535765	B.1.547	2020-03-13
Scotland|CVR47|EPI_ISL_425776|B.32|2020-03-13	Scotland	CVR47	EPI_ISL_425776	B.32	2020-03-13
Qatar|QA-QU-02-2-44|EPI_ISL_1712699|B.36|2020-03-13	Qatar	QA-QU-02-2-44	EPI_ISL_1712699	B.36	2020-03-13
Scotland|CVR33|EPI_ISL_425762|B.45|2020-03-13	Scotland	CVR33	EPI_ISL_425762	B.45	2020-03-13
USA|CT-UW328|EPI_ISL_418895|B.1.108|2020-03-14	USA	CT-UW328	EPI_ISL_418895	B.1.108	2020-03-14
England|GSTT-265E3C2|EPI_ISL_484195|B.1.391|2020-03-14	England	GSTT-265E3C2	EPI_ISL_484195	B.1.391	2020-03-14
USA|TX-HMH046|EPI_ISL_434755|B.1.450|2020-03-14	USA	TX-HMH046	EPI_ISL_434755	B.1.450	2020-03-14
Germany|HH-hpi-p1504|EPI_ISL_776010|B.1.465|2020-03-14	Germany	HH-hpi-p1504	EPI_ISL_776010	B.1.465	2020-03-14
UnitedArabEmira|L9766|EPI_ISL_435142|B.56|2020-03-14	UnitedArabEmira	L9766	EPI_ISL_435142	B.56	2020-03-14
England|20122017204|EPI_ISL_465738|B.1.1.166|2020-03-15	England	20122017204	EPI_ISL_465738	B.1.1.166	2020-03-15
USA|IL-NM025|EPI_ISL_444535|B.1.162|2020-03-15	USA	IL-NM025	EPI_ISL_444535	B.1.162	2020-03-15
USA|TX-QDX-25|EPI_ISL_467906|B.1.324|2020-03-15	USA	TX-QDX-25	EPI_ISL_467906	B.1.324	2020-03-15
Australia|NSW2004|EPI_ISL_500596|B.1.384|2020-03-15	Australia	NSW2004	EPI_ISL_500596	B.1.384	2020-03-15
USA|WI-UW-158|EPI_ISL_428254|B.1.483|2020-03-15	USA	WI-UW-158	EPI_ISL_428254	B.1.483	2020-03-15
Israel|CVL-n-6112|EPI_ISL_475010|B.1.505|2020-03-15	Israel	CVL-n-6112	EPI_ISL_475010	B.1.505	2020-03-15
USA|NY-PV09362|EPI_ISL_450050|B.1.507|2020-03-15	USA	NY-PV09362	EPI_ISL_450050	B.1.507	2020-03-15
USA|MN-QDX-1320|EPI_ISL_572109|B.1.589|2020-03-15	USA	MN-QDX-1320	EPI_ISL_572109	B.1.589	2020-03-15
Luxembourg|LNS0366116|EPI_ISL_419564|B.1.94|2020-03-15	Luxembourg	LNS0366116	EPI_ISL_419564	B.1.94	2020-03-15
Switzerland|SG-ETHZ-100145|EPI_ISL_451729|B.1.1.142|2020-03-16	Switzerland	SG-ETHZ-100145	EPI_ISL_451729	B.1.1.142	2020-03-16
Japan|PG-0189|EPI_ISL_479894|B.1.1.283|2020-03-16	Japan	PG-0189	EPI_ISL_479894	B.1.1.283	2020-03-16
UnitedArabEmira|L0879|EPI_ISL_435124|B.1.1.366|2020-03-16	UnitedArabEmira	L0879	EPI_ISL_435124	B.1.1.366	2020-03-16
Iceland|188|EPI_ISL_417816|B.1.1.5|2020-03-16	Iceland	188	EPI_ISL_417816	B.1.1.5	2020-03-16
Germany|SL-SU-10427535|EPI_ISL_707950|B.1.103|2020-03-16	Germany	SL-SU-10427535	EPI_ISL_707950	B.1.103	2020-03-16
USA|CA-CZB-1414|EPI_ISL_468389|B.1.163|2020-03-16	USA	CA-CZB-1414	EPI_ISL_468389	B.1.163	2020-03-16
Portugal|PT1095|EPI_ISL_511642|B.1.224|2020-03-16	Portugal	PT1095	EPI_ISL_511642	B.1.224	2020-03-16
Sweden|20-23088|EPI_ISL_831975|B.1.227|2020-03-16	Sweden	20-23088	EPI_ISL_831975	B.1.227	2020-03-16
Switzerland|BS-UHB-42193328|EPI_ISL_528149|B.1.243|2020-03-16	Switzerland	BS-UHB-42193328	EPI_ISL_528149	B.1.243	2020-03-16
USA|LA-QDX-2624|EPI_ISL_604936|B.1.284|2020-03-16	USA	LA-QDX-2624	EPI_ISL_604936	B.1.284	2020-03-16
USA|FL-QDX-1620|EPI_ISL_603938|B.1.293|2020-03-16	USA	FL-QDX-1620	EPI_ISL_603938	B.1.293	2020-03-16
England|BRIS-12193A|EPI_ISL_440220|B.1.379|2020-03-16	England	BRIS-12193A	EPI_ISL_440220	B.1.379	2020-03-16
USA|MN-QDX-1722|EPI_ISL_604071|B.1.424|2020-03-16	USA	MN-QDX-1722	EPI_ISL_604071	B.1.424	2020-03-16
USA|CA-QDX-1915|EPI_ISL_604200|B.1.441|2020-03-16	USA	CA-QDX-1915	EPI_ISL_604200	B.1.441	2020-03-16
Australia|VIC95|EPI_ISL_419806|B.1.576|2020-03-16	Australia	VIC95	EPI_ISL_419806	B.1.576	2020-03-16
Scotland|EDB051|EPI_ISL_425855|B.1.1.277|2020-03-17	Scotland	EDB051	EPI_ISL_425855	B.1.1.277	2020-03-17
Belgium|UGent-96|EPI_ISL_468744|B.1.1.75|2020-03-17	Belgium	UGent-96	EPI_ISL_468744	B.1.1.75	2020-03-17
USA|WA-UW389|EPI_ISL_418954|B.1.38|2020-03-17	USA	WA-UW389	EPI_ISL_418954	B.1.38	2020-03-17
France|GES-2843|EPI_ISL_420045|B.1.482|2020-03-17	France	GES-2843	EPI_ISL_420045	B.1.482	2020-03-17
USA|FL-QDX-1658|EPI_ISL_603941|B.1.1.67|2020-03-18	USA	FL-QDX-1658	EPI_ISL_603941	B.1.1.67	2020-03-18
Australia|VIC774|EPI_ISL_427050|B.1.23|2020-03-18	Australia	VIC774	EPI_ISL_427050	B.1.23	2020-03-18
England|BRIS-121C9B|EPI_ISL_440218|B.1.81|2020-03-18	England	BRIS-121C9B	EPI_ISL_440218	B.1.81	2020-03-18
England|SHEF-CBCA3|EPI_ISL_432515|B.1.1.137|2020-03-19	England	SHEF-CBCA3	EPI_ISL_432515	B.1.1.137	2020-03-19
Australia|VIC191|EPI_ISL_419887|B.1.1.416|2020-03-19	Australia	VIC191	EPI_ISL_419887	B.1.1.416	2020-03-19
USA|CA-QDX-1625|EPI_ISL_603907|B.1.170|2020-03-19	USA	CA-QDX-1625	EPI_ISL_603907	B.1.170	2020-03-19
Denmark|ALAB-HH-157|EPI_ISL_452032|B.1.263|2020-03-19	Denmark	ALAB-HH-157	EPI_ISL_452032	B.1.263	2020-03-19
Germany|HH-hpi-p1783|EPI_ISL_776154|B.1.311|2020-03-19	Germany	HH-hpi-p1783	EPI_ISL_776154	B.1.311	2020-03-19
USA|UT-028|EPI_ISL_417971|B.1.370|2020-03-19	USA	UT-028	EPI_ISL_417971	B.1.370	2020-03-19
Senegal|620|EPI_ISL_420078|A.11|2020-03-20	Senegal	620	EPI_ISL_420078	A.11	2020-03-20
Wales|PHWC-24F09|EPI_ISL_420926|B.1.1.289|2020-03-20	Wales	PHWC-24F09	EPI_ISL_420926	B.1.1.289	2020-03-20
Portugal|PT0513|EPI_ISL_454237|B.1.1.88|2020-03-20	Portugal	PT0513	EPI_ISL_454237	B.1.1.88	2020-03-20
NorthernIreland|NIRE-1020D0|EPI_ISL_441379|B.1.1.134|2020-03-21	NorthernIreland	NIRE-1020D0	EPI_ISL_441379	B.1.1.134	2020-03-21
Iceland|1014|EPI_ISL_1586301|B.1.1.162|2020-03-21	Iceland	1014	EPI_ISL_1586301	B.1.1.162	2020-03-21
Bulgaria|6|EPI_ISL_480297|B.1.1.192|2020-03-21	Bulgaria	6	EPI_ISL_480297	B.1.1.192	2020-03-21
England|BRIS-121D98|EPI_ISL_440000|B.1.1.270|2020-03-21	England	BRIS-121D98	EPI_ISL_440000	B.1.1.270	2020-03-21
England|CAMB-73141|EPI_ISL_440297|B.1.1.41|2020-03-21	England	CAMB-73141	EPI_ISL_440297	B.1.1.41	2020-03-21
Australia|VIC252|EPI_ISL_419947|B.1.1.89|2020-03-21	Australia	VIC252	EPI_ISL_419947	B.1.1.89	2020-03-21
England|PORT-2D2111|EPI_ISL_611771|B.1.177.20|2020-03-21	England	PORT-2D2111	EPI_ISL_611771	B.1.177.20	2020-03-21
Australia|QLD1276|EPI_ISL_693277|B.1.177.7|2020-03-21	Australia	QLD1276	EPI_ISL_693277	B.1.177.7	2020-03-21
USA|CA-CSMC110|EPI_ISL_475586|A.24|2020-03-22	USA	CA-CSMC110	EPI_ISL_475586	A.24	2020-03-22
Canada|NS-NML-912|EPI_ISL_914979|B.1.1.133|2020-03-22	Canada	NS-NML-912	EPI_ISL_914979	B.1.1.133	2020-03-22
Canada|ON-S1230|EPI_ISL_586305|B.1.1.181|2020-03-22	Canada	ON-S1230	EPI_ISL_586305	B.1.1.181	2020-03-22
Italy|VEN-IZSVe-2-2|EPI_ISL_636472|B.1.1.400|2020-03-22	Italy	VEN-IZSVe-2-2	EPI_ISL_636472	B.1.1.400	2020-03-22
Nigeria|NG57839|EPI_ISL_654794|B.1.1.487|2020-03-22	Nigeria	NG57839	EPI_ISL_654794	B.1.1.487	2020-03-22
Canada|Qc-LSPQ-L00239009|EPI_ISL_536230|B.1.219|2020-03-22	Canada	Qc-LSPQ-L00239009	EPI_ISL_536230	B.1.219	2020-03-22
England|20130069504|EPI_ISL_423656|B.1.258|2020-03-22	England	20130069504	EPI_ISL_423656	B.1.258	2020-03-22
USA|TX-HMH0153|EPI_ISL_434852|B.1.276|2020-03-22	USA	TX-HMH0153	EPI_ISL_434852	B.1.276	2020-03-22
Canada|AB-35896|EPI_ISL_805923|B.1.308|2020-03-22	Canada	AB-35896	EPI_ISL_805923	B.1.308	2020-03-22
Australia|VIC369|EPI_ISL_426677|B.1.434|2020-03-22	Australia	VIC369	EPI_ISL_426677	B.1.434	2020-03-22
Kazakhstan|NCB-1|EPI_ISL_435045|B.4.1|2020-03-22	Kazakhstan	NCB-1	EPI_ISL_435045	B.4.1	2020-03-22
Ecuador|EC-G-2565|EPI_ISL_826805|B.1.1.326|2020-03-23	Ecuador	EC-G-2565	EPI_ISL_826805	B.1.1.326	2020-03-23
Belgium|FMC-0323159|EPI_ISL_420416|B.1.1.436|2020-03-23	Belgium	FMC-0323159	EPI_ISL_420416	B.1.1.436	2020-03-23
Finland|24MS1A6|EPI_ISL_1239429|B.1.1.110|2020-03-24	Finland	24MS1A6	EPI_ISL_1239429	B.1.1.110	2020-03-24
Scotland|GCVR-17027D|EPI_ISL_459686|B.1.1.482|2020-03-24	Scotland	GCVR-17027D	EPI_ISL_459686	B.1.1.482	2020-03-24
SaudiArabia|KAUST-MAKKAH143|EPI_ISL_678229|B.1.260|2020-03-24	SaudiArabia	KAUST-MAKKAH143	EPI_ISL_678229	B.1.260	2020-03-24
USA|MN-MDH-1293|EPI_ISL_483013|B.1.330|2020-03-24	USA	MN-MDH-1293	EPI_ISL_483013	B.1.330	2020-03-24
Spain|AR-IBV-2474|EPI_ISL_468816|B.1.542|2020-03-24	Spain	AR-IBV-2474	EPI_ISL_468816	B.1.542	2020-03-24
Japan|PG-2894|EPI_ISL_691020|B.1.1.285|2020-03-25	Japan	PG-2894	EPI_ISL_691020	B.1.1.285	2020-03-25
Scotland|CVR702|EPI_ISL_433327|B.1.1.43|2020-03-25	Scotland	CVR702	EPI_ISL_433327	B.1.1.43	2020-03-25
SaudiArabia|KAUST-Jeddah59|EPI_ISL_437496|B.1.471|2020-03-25	SaudiArabia	KAUST-Jeddah59	EPI_ISL_437496	B.1.471	2020-03-25
Egypt|CPHL-NRC-18|EPI_ISL_794594|B.1.535|2020-03-25	Egypt	CPHL-NRC-18	EPI_ISL_794594	B.1.535	2020-03-25
NewZealand|20VR3181|EPI_ISL_579469|B.1.545|2020-03-25	NewZealand	20VR3181	EPI_ISL_579469	B.1.545	2020-03-25
Wales|PHWC-15C462|EPI_ISL_472490|B.1.1.249|2020-03-26	Wales	PHWC-15C462	EPI_ISL_472490	B.1.1.249	2020-03-26
Spain|VC-FISABIO-571|EPI_ISL_447502|AF.1|2020-03-27	Spain	VC-FISABIO-571	EPI_ISL_447502	AF.1	2020-03-27
Japan|PG-1918|EPI_ISL_685524|B.1.1.48|2020-03-27	Japan	PG-1918	EPI_ISL_685524	B.1.1.48	2020-03-27
USA|OR-PROV-220|EPI_ISL_482455|B.1.161|2020-03-27	USA	OR-PROV-220	EPI_ISL_482455	B.1.161	2020-03-27
England|BRIS-1253DE|EPI_ISL_443943|B.1.167|2020-03-27	England	BRIS-1253DE	EPI_ISL_443943	B.1.167	2020-03-27
England|BRIS-1254AE|EPI_ISL_464549|B.1.252|2020-03-27	England	BRIS-1254AE	EPI_ISL_464549	B.1.252	2020-03-27
Belgium|LL-0328341|EPI_ISL_462195|B.1.1.200|2020-03-28	Belgium	LL-0328341	EPI_ISL_462195	B.1.1.200	2020-03-28
Luxembourg|LNS4530810|EPI_ISL_429770|B.1.143|2020-03-28	Luxembourg	LNS4530810	EPI_ISL_429770	B.1.143	2020-03-28
Poland|PL-P4|EPI_ISL_428927|B.1.187|2020-03-28	Poland	PL-P4	EPI_ISL_428927	B.1.187	2020-03-28
Scotland|GCVR-17176E|EPI_ISL_489620|B.1.248|2020-03-28	Scotland	GCVR-17176E	EPI_ISL_489620	B.1.248	2020-03-28
Belgium|VHEJ-0329357|EPI_ISL_462211|B.1.1.221|2020-03-29	Belgium	VHEJ-0329357	EPI_ISL_462211	B.1.1.221	2020-03-29
Portugal|PT1401|EPI_ISL_511360|B.1.1.303|2020-03-29	Portugal	PT1401	EPI_ISL_511360	B.1.1.303	2020-03-29
Israel|13075703|EPI_ISL_447450|B.1.1.50|2020-03-29	Israel	13075703	EPI_ISL_447450	B.1.1.50	2020-03-29
England|SHEF-C03E5|EPI_ISL_420221|B.1.607|2020-03-29	England	SHEF-C03E5	EPI_ISL_420221	B.1.607	2020-03-29
Wales|PHWC-2764D|EPI_ISL_432211|B.1.1.363|2020-03-30	Wales	PHWC-2764D	EPI_ISL_432211	B.1.1.363	2020-03-30
Australia|VIC1192|EPI_ISL_430528|B.1.338|2020-03-30	Australia	VIC1192	EPI_ISL_430528	B.1.338	2020-03-30
Iceland|733|EPI_ISL_1586661|B.1.470|2020-03-30	Iceland	733	EPI_ISL_1586661	B.1.470	2020-03-30
USA|CA-SR0447|EPI_ISL_467971|B.1.552|2020-03-30	USA	CA-SR0447	EPI_ISL_467971	B.1.552	2020-03-30
Canada|QC-JUS-V6011098|EPI_ISL_889857|B.1.592|2020-03-30	Canada	QC-JUS-V6011098	EPI_ISL_889857	B.1.592	2020-03-30
India|MH-NIV-QA-710|EPI_ISL_454565|B.1.1.101|2020-03-31	India	MH-NIV-QA-710	EPI_ISL_454565	B.1.1.101	2020-03-31
England|NORT-289744|EPI_ISL_458605|B.1.1.168|2020-03-31	England	NORT-289744	EPI_ISL_458605	B.1.1.168	2020-03-31
England|CAMB-77990|EPI_ISL_439524|B.1.1.304|2020-03-31	England	CAMB-77990	EPI_ISL_439524	B.1.1.304	2020-03-31
England|CAMB-7386A|EPI_ISL_425246|B.1.1.398|2020-03-31	England	CAMB-7386A	EPI_ISL_425246	B.1.1.398	2020-03-31
USA|WA-UW-4582|EPI_ISL_429607|B.1.169|2020-03-31	USA	WA-UW-4582	EPI_ISL_429607	B.1.169	2020-03-31
USA|NY-NYCPHL-000123|EPI_ISL_631614|B.1.486|2020-03-31	USA	NY-NYCPHL-000123	EPI_ISL_631614	B.1.486	2020-03-31
France|IDF-HB-112003109999|EPI_ISL_940256|B.1.84|2020-03-31	France	IDF-HB-112003109999	EPI_ISL_940256	B.1.84	2020-03-31
Scotland|EDB5108|EPI_ISL_453188|B.1.9.1|2020-03-31	Scotland	EDB5108	EPI_ISL_453188	B.1.9.1	2020-03-31
Russia|CRIE187963|EPI_ISL_486829|B.1.1.163|2020-04-01	Russia	CRIE187963	EPI_ISL_486829	B.1.1.163	2020-04-01
Germany|BY-MVP-0084|EPI_ISL_437278|B.1.134|2020-04-01	Germany	BY-MVP-0084	EPI_ISL_437278	B.1.134	2020-04-01
USA|WY-WYPHL-20007007|EPI_ISL_493063|B.1.301|2020-04-01	USA	WY-WYPHL-20007007	EPI_ISL_493063	B.1.301	2020-04-01
Netherlands|NA-292|EPI_ISL_422601|B.1.96|2020-04-01	Netherlands	NA-292	EPI_ISL_422601	B.1.96	2020-04-01
England|CAMB-7A14A|EPI_ISL_441289|B.1.1.178|2020-04-02	England	CAMB-7A14A	EPI_ISL_441289	B.1.1.178	2020-04-02
USA|WA-S481|EPI_ISL_434241|B.1.1.26|2020-04-02	USA	WA-S481	EPI_ISL_434241	B.1.1.26	2020-04-02
NewZealand|20VR1914|EPI_ISL_579162|B.1.1.461|2020-04-02	NewZealand	20VR1914	EPI_ISL_579162	B.1.1.461	2020-04-02
Iceland|1419|EPI_ISL_1586864|B.1.1.409|2020-04-03	Iceland	1419	EPI_ISL_1586864	B.1.1.409	2020-04-03
England|LEED-2A87C7|EPI_ISL_539017|B.1.110.2|2020-04-03	England	LEED-2A87C7	EPI_ISL_539017	B.1.110.2	2020-04-03
England|BRIS-122BAC|EPI_ISL_440738|B.1.198|2020-04-03	England	BRIS-122BAC	EPI_ISL_440738	B.1.198	2020-04-03
Israel|13077723|EPI_ISL_447427|B.1.362|2020-04-03	Israel	13077723	EPI_ISL_447427	B.1.362	2020-04-03
Wales|QEUH-9A4506|EPI_ISL_540217|B.1.1.138|2020-04-04	Wales	QEUH-9A4506	EPI_ISL_540217	B.1.1.138	2020-04-04
Mexico|CMX-INER-0026|EPI_ISL_837628|B.1.1.222|2020-04-04	Mexico	CMX-INER-0026	EPI_ISL_837628	B.1.1.222	2020-04-04
Germany|BE-ChVir-W1078-7878|EPI_ISL_753932|B.1.548|2020-04-04	Germany	BE-ChVir-W1078-7878	EPI_ISL_753932	B.1.548	2020-04-04
Russia|StPetersburg-RII4655S|EPI_ISL_427322|B.1.1.370|2020-04-05	Russia	StPetersburg-RII4655S	EPI_ISL_427322	B.1.1.370	2020-04-05
England|CAMB-7CC38|EPI_ISL_442171|B.1.1.379|2020-04-05	England	CAMB-7CC38	EPI_ISL_442171	B.1.1.379	2020-04-05
Sweden|20-50673|EPI_ISL_475155|B.1.1.261|2020-04-06	Sweden	20-50673	EPI_ISL_475155	B.1.1.261	2020-04-06
USA|IL-LCH-0052|EPI_ISL_1501744|B.1.180|2020-04-06	USA	IL-LCH-0052	EPI_ISL_1501744	B.1.180	2020-04-06
USA|TX-DSHS-0225|EPI_ISL_525784|B.1.1.244|2020-04-07	USA	TX-DSHS-0225	EPI_ISL_525784	B.1.1.244	2020-04-07
Wales|PHWC-2A96F|EPI_ISL_445641|B.1.1.360|2020-04-07	Wales	PHWC-2A96F	EPI_ISL_445641	B.1.1.360	2020-04-07
USA|CA-CZB-10156|EPI_ISL_672235|B.1.403|2020-04-07	USA	CA-CZB-10156	EPI_ISL_672235	B.1.403	2020-04-07
USA|FL-BPHL-0656|EPI_ISL_508860|B.1.493|2020-04-07	USA	FL-BPHL-0656	EPI_ISL_508860	B.1.493	2020-04-07
Italy|LAZ-AMC-2004088031-DS|EPI_ISL_1854982|B.1.1.58|2020-04-08	Italy	LAZ-AMC-2004088031-DS	EPI_ISL_1854982	B.1.1.58	2020-04-08
England|CAMB-7AEAD|EPI_ISL_433888|B.1.1.197|2020-04-09	England	CAMB-7AEAD	EPI_ISL_433888	B.1.1.197	2020-04-09
England|CAMB-7ACC1|EPI_ISL_433864|B.1.1.268|2020-04-09	England	CAMB-7ACC1	EPI_ISL_433864	B.1.1.268	2020-04-09
India|WB-IK62|EPI_ISL_511903|B.1.206|2020-04-09	India	WB-IK62	EPI_ISL_511903	B.1.206	2020-04-09
SierraLeone|KGH-G-8625|EPI_ISL_512816|A.12|2020-04-10	SierraLeone	KGH-G-8625	EPI_ISL_512816	A.12	2020-04-10
Russia|Moscow-PMVL-10|EPI_ISL_470903|B.1.1.500|2020-04-10	Russia	Moscow-PMVL-10	EPI_ISL_470903	B.1.1.500	2020-04-10
Italy|LOM-Pavia-41147|EPI_ISL_1166102|B.1.1.265|2020-04-11	Italy	LOM-Pavia-41147	EPI_ISL_1166102	B.1.1.265	2020-04-11
USA|MN-MDH-1768|EPI_ISL_590772|B.1.596|2020-04-11	USA	MN-MDH-1768	EPI_ISL_590772	B.1.596	2020-04-11
NorthernIreland|NIRE-FC368|EPI_ISL_470028|B.1.1.148|2020-04-12	NorthernIreland	NIRE-FC368	EPI_ISL_470028	B.1.1.148	2020-04-12
Spain|PV-IBV-2137|EPI_ISL_468885|B.1.1.53|2020-04-12	Spain	PV-IBV-2137	EPI_ISL_468885	B.1.1.53	2020-04-12
England|NOTT-110330|EPI_ISL_441501|B.1.1.55|2020-04-12	England	NOTT-110330	EPI_ISL_441501	B.1.1.55	2020-04-12
USA|MN-MDH-1774|EPI_ISL_590777|B.1.382|2020-04-13	USA	MN-MDH-1774	EPI_ISL_590777	B.1.382	2020-04-13
Australia|NSW601|EPI_ISL_478713|B.1.411|2020-04-13	Australia	NSW601	EPI_ISL_478713	B.1.411	2020-04-13
Panama|GMI-PA340863|EPI_ISL_1502839|A.2.5.1|2020-04-14	Panama	GMI-PA340863	EPI_ISL_1502839	A.2.5.1	2020-04-14
Panama|GMI-PA341357|EPI_ISL_1502840|A.2.5|2020-04-15	Panama	GMI-PA341357	EPI_ISL_1502840	A.2.5	2020-04-15
England|SHEF-C16DC|EPI_ISL_432729|B.1.1.31|2020-04-15	England	SHEF-C16DC	EPI_ISL_432729	B.1.1.31	2020-04-15
SouthAfrica|NHLS-UCT-GP-5021|EPI_ISL_640097|B.1.1.34|2020-04-15	SouthAfrica	NHLS-UCT-GP-5021	EPI_ISL_640097	B.1.1.34	2020-04-15
Scotland|EDB1832|EPI_ISL_433152|B.1.126|2020-04-16	Scotland	EDB1832	EPI_ISL_433152	B.1.126	2020-04-16
USA|MA-MASPHL-00271|EPI_ISL_791703|B.1.1.335|2020-04-17	USA	MA-MASPHL-00271	EPI_ISL_791703	B.1.1.335	2020-04-17
USA|AZ-TG724354|EPI_ISL_1113468|B.1.445|2020-04-17	USA	AZ-TG724354	EPI_ISL_1113468	B.1.445	2020-04-17
USA|NH-Yale-1640|EPI_ISL_1168366|B.1.443|2020-04-18	USA	NH-Yale-1640	EPI_ISL_1168366	B.1.443	2020-04-18
USA|VA-DCLS-0684|EPI_ISL_500846|B.1.451|2020-04-18	USA	VA-DCLS-0684	EPI_ISL_500846	B.1.451	2020-04-18
USA|FL-BPHL-1986|EPI_ISL_653139|B.1.509|2020-04-18	USA	FL-BPHL-1986	EPI_ISL_653139	B.1.509	2020-04-18
USA|MO-MSPHL-000515|EPI_ISL_1392875|B.1.377|2020-04-19	USA	MO-MSPHL-000515	EPI_ISL_1392875	B.1.377	2020-04-19
Denmark|DCGC-6742|EPI_ISL_622356|A.15|2020-04-20	Denmark	DCGC-6742	EPI_ISL_622356	A.15	2020-04-20
Russia|StPetersburg-RII7520S|EPI_ISL_450256|B.1.1.127|2020-04-20	Russia	StPetersburg-RII7520S	EPI_ISL_450256	B.1.1.127	2020-04-20
Mexico|CMX-INER-0070|EPI_ISL_837669|B.1.1.222|2020-04-20	Mexico	CMX-INER-0070	EPI_ISL_837669	B.1.1.222	2020-04-20
Finland|20A16S7|EPI_ISL_481595|B.1.490|2020-04-20	Finland	20A16S7	EPI_ISL_481595	B.1.490	2020-04-20
USA|CO-CDPHE-2004220732|EPI_ISL_710184|B.1.492|2020-04-20	USA	CO-CDPHE-2004220732	EPI_ISL_710184	B.1.492	2020-04-20
USA|NY-Wadsworth-57118-01|EPI_ISL_525686|B.1.506|2020-04-20	USA	NY-Wadsworth-57118-01	EPI_ISL_525686	B.1.506	2020-04-20
India|GJ-GBRC9|EPI_ISL_435056|B.1.145|2020-04-21	India	GJ-GBRC9	EPI_ISL_435056	B.1.145	2020-04-21
EquatorialGuine|2426|EPI_ISL_648316|B.1.192|2020-04-21	EquatorialGuine	2426	EPI_ISL_648316	B.1.192	2020-04-21
USA|UT-UPHL-02807|EPI_ISL_575081|B.1.106|2020-04-23	USA	UT-UPHL-02807	EPI_ISL_575081	B.1.106	2020-04-23
Scotland|EDB4335|EPI_ISL_453122|B.1.168|2020-04-23	Scotland	EDB4335	EPI_ISL_453122	B.1.168	2020-04-23
USA|AZ-TG280883|EPI_ISL_694212|B.1.1.169|2020-04-24	USA	AZ-TG280883	EPI_ISL_694212	B.1.1.169	2020-04-24
USA|WA-S860|EPI_ISL_463350|B.1.1.222|2020-04-24	USA	WA-S860	EPI_ISL_463350	B.1.1.222	2020-04-24
Mexico|MEX-InDRE-IBT-119|EPI_ISL_1301575|B.1.1.222|2020-04-24	Mexico	MEX-InDRE-IBT-119	EPI_ISL_1301575	B.1.1.222	2020-04-24
USA|un-CDC-7653|EPI_ISL_514090|B.1.1.441|2020-04-24	USA	un-CDC-7653	EPI_ISL_514090	B.1.1.441	2020-04-24
Belarus|MI-RII-MH11337S|EPI_ISL_754229|B.1.164|2020-04-24	Belarus	MI-RII-MH11337S	EPI_ISL_754229	B.1.164	2020-04-24
USA|WA-UW-8165|EPI_ISL_570200|B.1.341|2020-04-25	USA	WA-UW-8165	EPI_ISL_570200	B.1.341	2020-04-25
USA|MA-MASPHL-00406|EPI_ISL_693142|B.1.458|2020-04-25	USA	MA-MASPHL-00406	EPI_ISL_693142	B.1.458	2020-04-25
England|MILK-482D1A|EPI_ISL_559696|B.1.1.217|2020-04-26	England	MILK-482D1A	EPI_ISL_559696	B.1.1.217	2020-04-26
USA|TX-HMH-1172|EPI_ISL_542563|B.1.325|2020-04-26	USA	TX-HMH-1172	EPI_ISL_542563	B.1.325	2020-04-26
USA|WA-S904|EPI_ISL_463394|B.1.1.291|2020-04-27	USA	WA-S904	EPI_ISL_463394	B.1.1.291	2020-04-27
USA|TX-QDX-188|EPI_ISL_494543|B.1.366|2020-04-27	USA	TX-QDX-188	EPI_ISL_494543	B.1.366	2020-04-27
USA|NC-QDX-171|EPI_ISL_494523|B.1.498|2020-04-27	USA	NC-QDX-171	EPI_ISL_494523	B.1.498	2020-04-27
Sweden|20-14090|EPI_ISL_450828|B.1.1.91|2020-04-28	Sweden	20-14090	EPI_ISL_450828	B.1.1.91	2020-04-28
USA|CA-CDPH041|EPI_ISL_754930|B.1.508|2020-04-28	USA	CA-CDPH041	EPI_ISL_754930	B.1.508	2020-04-28
Mexico|CMX-INER-0083|EPI_ISL_837681|B.1.1.222|2020-04-29	Mexico	CMX-INER-0083	EPI_ISL_837681	B.1.1.222	2020-04-29
USA|NM-QDX-208|EPI_ISL_494531|B.1.1.222|2020-04-30	USA	NM-QDX-208	EPI_ISL_494531	B.1.1.222	2020-04-30
Mexico|BCN-IBT-IMSS-481|EPI_ISL_1301661|B.1.1.222|2020-04-30	Mexico	BCN-IBT-IMSS-481	EPI_ISL_1301661	B.1.1.222	2020-04-30
Egypt|MASRI-014|EPI_ISL_482765|B.1.466|2020-04-30	Egypt	MASRI-014	EPI_ISL_482765	B.1.466	2020-04-30
England|NOTT-11152A|EPI_ISL_457576|B.1.1.149|2020-05-01	England	NOTT-11152A	EPI_ISL_457576	B.1.1.149	2020-05-01
England|BRIS-12ACFC|EPI_ISL_458367|B.1.165|2020-05-01	England	BRIS-12ACFC	EPI_ISL_458367	B.1.165	2020-05-01
Russia|SAR-RARI-3573|EPI_ISL_678283|B.1.1.424|2020-05-02	Russia	SAR-RARI-3573	EPI_ISL_678283	B.1.1.424	2020-05-02
USA|TX-HMH-1371|EPI_ISL_542678|B.1.511|2020-05-02	USA	TX-HMH-1371	EPI_ISL_542678	B.1.511	2020-05-02
USA|UT-UPHL-03046|EPI_ISL_560897|B.1.554|2020-05-02	USA	UT-UPHL-03046	EPI_ISL_560897	B.1.554	2020-05-02
Bangladesh|BARJ-CVASU-CTG-517|EPI_ISL_450344|B.1.36.16|2020-05-03	Bangladesh	BARJ-CVASU-CTG-517	EPI_ISL_450344	B.1.36.16	2020-05-03
Mexico|CMX-InDRE-IBT-114|EPI_ISL_1301582|B.1.1.222|2020-05-04	Mexico	CMX-InDRE-IBT-114	EPI_ISL_1301582	B.1.1.222	2020-05-04
Mexico|CMX-InDRE-IBT-113|EPI_ISL_1301581|B.1.1.222|2020-05-04	Mexico	CMX-InDRE-IBT-113	EPI_ISL_1301581	B.1.1.222	2020-05-04
Mexico|CMX-InDRE-IBT-118|EPI_ISL_1301580|B.1.1.222|2020-05-04	Mexico	CMX-InDRE-IBT-118	EPI_ISL_1301580	B.1.1.222	2020-05-04
India|GJ-GBRC53|EPI_ISL_444484|B.1.247|2020-05-04	India	GJ-GBRC53	EPI_ISL_444484	B.1.247	2020-05-04
USA|CA-ALSR-1274|EPI_ISL_494472|B.1.1.222|2020-05-05	USA	CA-ALSR-1274	EPI_ISL_494472	B.1.1.222	2020-05-05
USA|VA-DCLS-0824|EPI_ISL_516698|B.1.1.447|2020-05-05	USA	VA-DCLS-0824	EPI_ISL_516698	B.1.1.447	2020-05-05
Mexico|CMX-INER-0088|EPI_ISL_837686|B.1.1.222|2020-05-07	Mexico	CMX-INER-0088	EPI_ISL_837686	B.1.1.222	2020-05-07
England|ALDP-9EDBD2|EPI_ISL_580650|B.1.1.253|2020-05-09	England	ALDP-9EDBD2	EPI_ISL_580650	B.1.1.253	2020-05-09
Poland|PL-MCB-72|EPI_ISL_645071|B.1.213|2020-05-10	Poland	PL-MCB-72	EPI_ISL_645071	B.1.213	2020-05-10
USA|TX-HMH-2050|EPI_ISL_545087|B.1.1.118|2020-05-11	USA	TX-HMH-2050	EPI_ISL_545087	B.1.1.118	2020-05-11
Mexico|CMX-INER-IBT-1027|EPI_ISL_6316568|B.1.1.222|2020-05-11	Mexico	CMX-INER-IBT-1027	EPI_ISL_6316568	B.1.1.222	2020-05-11
Mexico|CMX-INER-IBT-1030|EPI_ISL_6316570|B.1.1.222|2020-05-12	Mexico	CMX-INER-IBT-1030	EPI_ISL_6316570	B.1.1.222	2020-05-12
Romania|283584|EPI_ISL_455469|B.1.408|2020-05-12	Romania	283584	EPI_ISL_455469	B.1.408	2020-05-12
USA|CA-CZB-2341|EPI_ISL_513791|B.1.452|2020-05-12	USA	CA-CZB-2341	EPI_ISL_513791	B.1.452	2020-05-12
Mexico|CMX-INER-IBT-48|EPI_ISL_1301724|B.1.1.222|2020-05-13	Mexico	CMX-INER-IBT-48	EPI_ISL_1301724	B.1.1.222	2020-05-13
USA|AZ-TG668340|EPI_ISL_696265|B.1.1.228|2020-05-13	USA	AZ-TG668340	EPI_ISL_696265	B.1.1.228	2020-05-13
USA|AZ-TG668341|EPI_ISL_696266|B.1.313|2020-05-13	USA	AZ-TG668341	EPI_ISL_696266	B.1.313	2020-05-13
Russia|OMS-ORINFI-7121S|EPI_ISL_569742|B.1.1.506|2020-05-14	Russia	OMS-ORINFI-7121S	EPI_ISL_569742	B.1.1.506	2020-05-14
England|QEUH-544733|EPI_ISL_533364|B.1.238|2020-05-14	England	QEUH-544733	EPI_ISL_533364	B.1.238	2020-05-14
Turkey|HSGM-2004082|EPI_ISL_814089|B.1.1.521|2020-05-15	Turkey	HSGM-2004082	EPI_ISL_814089	B.1.1.521	2020-05-15
USA|CA-CZB-10225|EPI_ISL_672264|B.1.1.205|2020-05-16	USA	CA-CZB-10225	EPI_ISL_672264	B.1.1.205	2020-05-16
Argentina|PAIS-F0040|EPI_ISL_981038|B.1.1.442|2020-05-16	Argentina	PAIS-F0040	EPI_ISL_981038	B.1.1.442	2020-05-16
England|SHEF-10B2E79|EPI_ISL_537248|B.1.173|2020-05-16	England	SHEF-10B2E79	EPI_ISL_537248	B.1.173	2020-05-16
Mexico|CMX-INER-IBT-51|EPI_ISL_1301725|B.1.1.222|2020-05-17	Mexico	CMX-INER-IBT-51	EPI_ISL_1301725	B.1.1.222	2020-05-17
USA|MA-MGH-03932|EPI_ISL_1011533|B.1.1.316|2020-05-17	USA	MA-MGH-03932	EPI_ISL_1011533	B.1.1.316	2020-05-17
Nigeria|BO-CV347|EPI_ISL_730012|B.1.467|2020-05-17	Nigeria	BO-CV347	EPI_ISL_730012	B.1.467	2020-05-17
Mexico|CMX-INER-0102|EPI_ISL_837700|B.1.1.222|2020-05-18	Mexico	CMX-INER-0102	EPI_ISL_837700	B.1.1.222	2020-05-18
Mexico|CMX-INER-0101|EPI_ISL_837699|B.1.1.222|2020-05-18	Mexico	CMX-INER-0101	EPI_ISL_837699	B.1.1.222	2020-05-18
England|LIVE-A3E9C|EPI_ISL_499956|B.1.1.95|2020-05-18	England	LIVE-A3E9C	EPI_ISL_499956	B.1.1.95	2020-05-18
England|SHEF-C80F5|EPI_ISL_529433|B.1.1.86|2020-05-19	England	SHEF-C80F5	EPI_ISL_529433	B.1.1.86	2020-05-19
USA|TX-DSHS-0912|EPI_ISL_602210|B.1.599|2020-05-20	USA	TX-DSHS-0912	EPI_ISL_602210	B.1.599	2020-05-20
England|BIRM-5FC59|EPI_ISL_473392|B.1.1.255|2020-05-21	England	BIRM-5FC59	EPI_ISL_473392	B.1.1.255	2020-05-21
SouthAfrica|KRISP-0143|EPI_ISL_467493|B.1.1.56|2020-05-21	SouthAfrica	KRISP-0143	EPI_ISL_467493	B.1.1.56	2020-05-21
USA|OR-PROV-535|EPI_ISL_1017469|B.1.357|2020-05-21	USA	OR-PROV-535	EPI_ISL_1017469	B.1.357	2020-05-21
USA|UT-UPHL-04478|EPI_ISL_525343|B.1.444|2020-05-21	USA	UT-UPHL-04478	EPI_ISL_525343	B.1.444	2020-05-21
Mexico|CMX-INMEGEN-04-05-138|EPI_ISL_4219873|B.1.1.222|2020-05-22	Mexico	CMX-INMEGEN-04-05-138	EPI_ISL_4219873	B.1.1.222	2020-05-22
USA|TX-HMH-3036|EPI_ISL_543949|B.1.1.230|2020-05-22	USA	TX-HMH-3036	EPI_ISL_543949	B.1.1.230	2020-05-22
Chile|RM-72850|EPI_ISL_746784|B.1.1.324|2020-05-22	Chile	RM-72850	EPI_ISL_746784	B.1.1.324	2020-05-22
England|ALDP-49F3BE|EPI_ISL_559611|B.1.1.45|2020-05-22	England	ALDP-49F3BE	EPI_ISL_559611	B.1.1.45	2020-05-22
Mexico|CMX-INER-IBT-1040|EPI_ISL_6316580|B.1.1.222|2020-05-23	Mexico	CMX-INER-IBT-1040	EPI_ISL_6316580	B.1.1.222	2020-05-23
CzechRepublic|NRL-6834|EPI_ISL_541333|B.1.1.266|2020-05-23	CzechRepublic	NRL-6834	EPI_ISL_541333	B.1.1.266	2020-05-23
Sweden|20-51697|EPI_ISL_510834|B.1.342|2020-05-23	Sweden	20-51697	EPI_ISL_510834	B.1.342	2020-05-23
Australia|WA189|EPI_ISL_596752|B.1.36.33|2020-05-23	Australia	WA189	EPI_ISL_596752	B.1.36.33	2020-05-23
India|TG-CCMB-GC1|EPI_ISL_528810|B.1.537|2020-05-24	India	TG-CCMB-GC1	EPI_ISL_528810	B.1.537	2020-05-24
Mexico|CMX-INMEGEN-04-05-106|EPI_ISL_4219842|B.1.1.222|2020-05-25	Mexico	CMX-INMEGEN-04-05-106	EPI_ISL_4219842	B.1.1.222	2020-05-25
Mexico|CMX-INMEGEN-04-05-186|EPI_ISL_4219920|B.1.1.222|2020-05-25	Mexico	CMX-INMEGEN-04-05-186	EPI_ISL_4219920	B.1.1.222	2020-05-25
Mexico|CMX-INMEGEN-04-05-97|EPI_ISL_4219833|B.1.1.222|2020-05-25	Mexico	CMX-INMEGEN-04-05-97	EPI_ISL_4219833	B.1.1.222	2020-05-25
Mexico|CMX-INMEGEN-04-05-185|EPI_ISL_4219919|B.1.1.222|2020-05-25	Mexico	CMX-INMEGEN-04-05-185	EPI_ISL_4219919	B.1.1.222	2020-05-25
Mexico|CMX-INMEGEN-04-05-114|EPI_ISL_4219850|B.1.1.222|2020-05-25	Mexico	CMX-INMEGEN-04-05-114	EPI_ISL_4219850	B.1.1.222	2020-05-25
Ghana|84182-S43|EPI_ISL_515104|B.1.1.404|2020-05-25	Ghana	84182-S43	EPI_ISL_515104	B.1.1.404	2020-05-25
Mexico|CMX-INMEGEN-04-05-123|EPI_ISL_4219859|B.1.1.222|2020-05-26	Mexico	CMX-INMEGEN-04-05-123	EPI_ISL_4219859	B.1.1.222	2020-05-26
Mexico|CMX-INMEGEN-04-05-169|EPI_ISL_4219903|B.1.1.222|2020-05-26	Mexico	CMX-INMEGEN-04-05-169	EPI_ISL_4219903	B.1.1.222	2020-05-26
Mexico|CMX-INER-IBT-31|EPI_ISL_1301602|B.1.1.222|2020-05-26	Mexico	CMX-INER-IBT-31	EPI_ISL_1301602	B.1.1.222	2020-05-26
Mexico|CMX-INER-IBT-64|EPI_ISL_1301601|B.1.1.222|2020-05-26	Mexico	CMX-INER-IBT-64	EPI_ISL_1301601	B.1.1.222	2020-05-26
Mexico|CMX-INMEGEN-04-05-145|EPI_ISL_4219880|B.1.1.222|2020-05-26	Mexico	CMX-INMEGEN-04-05-145	EPI_ISL_4219880	B.1.1.222	2020-05-26
Japan|PG-7972|EPI_ISL_687073|B.1.1.486|2020-05-26	Japan	PG-7972	EPI_ISL_687073	B.1.1.486	2020-05-26
Mexico|CMX-INER-0118|EPI_ISL_837715|B.1.1.222|2020-05-27	Mexico	CMX-INER-0118	EPI_ISL_837715	B.1.1.222	2020-05-27
USA|IL-IDPH-DEK-S-000843|EPI_ISL_1652426|B.1.305|2020-05-27	USA	IL-IDPH-DEK-S-000843	EPI_ISL_1652426	B.1.305	2020-05-27
Mexico|CMX-INER-0120|EPI_ISL_837717|B.1.1.222|2020-05-28	Mexico	CMX-INER-0120	EPI_ISL_837717	B.1.1.222	2020-05-28
Mexico|CMX-INER-0124|EPI_ISL_837721|B.1.1.222|2020-05-29	Mexico	CMX-INER-0124	EPI_ISL_837721	B.1.1.222	2020-05-29
Mexico|CMX-INER-IBT-1047|EPI_ISL_6316587|B.1.1.222|2020-05-29	Mexico	CMX-INER-IBT-1047	EPI_ISL_6316587	B.1.1.222	2020-05-29
Mexico|CMX-INER-IBT-1052|EPI_ISL_6316591|B.1.1.222|2020-05-29	Mexico	CMX-INER-IBT-1052	EPI_ISL_6316591	B.1.1.222	2020-05-29
Mexico|CMX-INER-0122|EPI_ISL_837719|B.1.1.222|2020-05-29	Mexico	CMX-INER-0122	EPI_ISL_837719	B.1.1.222	2020-05-29
Mexico|CMX-INER-0126|EPI_ISL_837723|B.1.1.222|2020-05-30	Mexico	CMX-INER-0126	EPI_ISL_837723	B.1.1.222	2020-05-30
Nigeria|NA-CV240|EPI_ISL_729926|B.1.1.484|2020-05-31	Nigeria	NA-CV240	EPI_ISL_729926	B.1.1.484	2020-05-31
CostaRica|HNN-0359|EPI_ISL_1517403|B.1.291|2020-05-31	CostaRica	HNN-0359	EPI_ISL_1517403	B.1.291	2020-05-31
England|ALDP-52AAA3|EPI_ISL_559078|B.1.1.120|2020-06-01	England	ALDP-52AAA3	EPI_ISL_559078	B.1.1.120	2020-06-01
England|CAMB-1B4116|EPI_ISL_473458|B.1.1.121|2020-06-01	England	CAMB-1B4116	EPI_ISL_473458	B.1.1.121	2020-06-01
USA|WA-S1779|EPI_ISL_496205|B.1.1.158|2020-06-01	USA	WA-S1779	EPI_ISL_496205	B.1.1.158	2020-06-01
Mexico|TLA-InDRE-IBT-69|EPI_ISL_1301557|B.1.1.222|2020-06-01	Mexico	TLA-InDRE-IBT-69	EPI_ISL_1301557	B.1.1.222	2020-06-01
England|ALDP-52B8A8|EPI_ISL_558929|B.1.1.365|2020-06-01	England	ALDP-52B8A8	EPI_ISL_558929	B.1.1.365	2020-06-01
Wales|PHWC-164E0F|EPI_ISL_479385|B.1.1.59|2020-06-01	Wales	PHWC-164E0F	EPI_ISL_479385	B.1.1.59	2020-06-01
England|ALDP-52B8D5|EPI_ISL_559053|B.1.251|2020-06-01	England	ALDP-52B8D5	EPI_ISL_559053	B.1.251	2020-06-01
England|ALDP-52B87B|EPI_ISL_558971|B.1.282|2020-06-01	England	ALDP-52B87B	EPI_ISL_558971	B.1.282	2020-06-01
USA|NV-NSPHL-A0205|EPI_ISL_515459|B.1.1.128|2020-06-02	USA	NV-NSPHL-A0205	EPI_ISL_515459	B.1.1.128	2020-06-02
England|ALDP-51F142|EPI_ISL_559032|B.1.1.155|2020-06-02	England	ALDP-51F142	EPI_ISL_559032	B.1.1.155	2020-06-02
Mexico|CMX-INER-IBT-1057|EPI_ISL_6316595|B.1.1.222|2020-06-02	Mexico	CMX-INER-IBT-1057	EPI_ISL_6316595	B.1.1.222	2020-06-02
Mexico|ZAC-InDRE-IBT-56|EPI_ISL_1301689|B.1.1.222|2020-06-02	Mexico	ZAC-InDRE-IBT-56	EPI_ISL_1301689	B.1.1.222	2020-06-02
Mexico|CMX-INER-0129|EPI_ISL_837726|B.1.1.222|2020-06-02	Mexico	CMX-INER-0129	EPI_ISL_837726	B.1.1.222	2020-06-02
Mexico|CMX-INER-IBT-1062|EPI_ISL_6316600|B.1.1.222|2020-06-03	Mexico	CMX-INER-IBT-1062	EPI_ISL_6316600	B.1.1.222	2020-06-03
Mexico|CMX-INER-IBT-1060|EPI_ISL_6316598|B.1.1.222|2020-06-03	Mexico	CMX-INER-IBT-1060	EPI_ISL_6316598	B.1.1.222	2020-06-03
Mexico|CMX-INMEGEN-04-07-48|EPI_ISL_4219969|B.1.1.222|2020-06-03	Mexico	CMX-INMEGEN-04-07-48	EPI_ISL_4219969	B.1.1.222	2020-06-03
England|NOTT-246F3C|EPI_ISL_950611|B.1.177.4|2020-06-03	England	NOTT-246F3C	EPI_ISL_950611	B.1.177.4	2020-06-03
Qatar|QA-WCMQ-FD17462386|EPI_ISL_1714211|B.1.428.3|2020-06-03	Qatar	QA-WCMQ-FD17462386	EPI_ISL_1714211	B.1.428.3	2020-06-03
USA|FL-BPHL-0504|EPI_ISL_495410|B.1.437|2020-06-03	USA	FL-BPHL-0504	EPI_ISL_495410	B.1.437	2020-06-03
USA|TX-HMH-2776|EPI_ISL_545546|B.1.546|2020-06-03	USA	TX-HMH-2776	EPI_ISL_545546	B.1.546	2020-06-03
Mexico|CMX-INER-IBT-1065|EPI_ISL_6316603|B.1.1.222|2020-06-04	Mexico	CMX-INER-IBT-1065	EPI_ISL_6316603	B.1.1.222	2020-06-04
Mexico|CMX-INER-0131|EPI_ISL_837728|B.1.1.222|2020-06-04	Mexico	CMX-INER-0131	EPI_ISL_837728	B.1.1.222	2020-06-04
Mexico|CMX-INMEGEN-04-05-187|EPI_ISL_4219921|B.1.1.222|2020-06-04	Mexico	CMX-INMEGEN-04-05-187	EPI_ISL_4219921	B.1.1.222	2020-06-04
Mexico|CMX-INMEGEN-04-05-171|EPI_ISL_4219905|B.1.1.222|2020-06-04	Mexico	CMX-INMEGEN-04-05-171	EPI_ISL_4219905	B.1.1.222	2020-06-04
Mexico|CMX-INER-IBT-1066|EPI_ISL_6316604|B.1.1.222|2020-06-04	Mexico	CMX-INER-IBT-1066	EPI_ISL_6316604	B.1.1.222	2020-06-04
Mexico|CMX-INMEGEN-04-07-17|EPI_ISL_4219938|B.1.1.222|2020-06-04	Mexico	CMX-INMEGEN-04-07-17	EPI_ISL_4219938	B.1.1.222	2020-06-04
Mexico|CMX-INER-IBT-1064|EPI_ISL_6316602|B.1.1.222|2020-06-04	Mexico	CMX-INER-IBT-1064	EPI_ISL_6316602	B.1.1.222	2020-06-04
Mexico|CMX-INMEGEN-04-05-148|EPI_ISL_4219883|B.1.1.222|2020-06-04	Mexico	CMX-INMEGEN-04-05-148	EPI_ISL_4219883	B.1.1.222	2020-06-04
Mexico|CMX-INMEGEN-04-05-132|EPI_ISL_4219867|B.1.1.222|2020-06-04	Mexico	CMX-INMEGEN-04-05-132	EPI_ISL_4219867	B.1.1.222	2020-06-04
Mexico|CMX-INMEGEN-04-05-140|EPI_ISL_4219875|B.1.1.222|2020-06-04	Mexico	CMX-INMEGEN-04-05-140	EPI_ISL_4219875	B.1.1.222	2020-06-04
Mexico|CMX-INMEGEN-04-07-32|EPI_ISL_4219953|B.1.1.222|2020-06-05	Mexico	CMX-INMEGEN-04-07-32	EPI_ISL_4219953	B.1.1.222	2020-06-05
USA|TX-DSHS-3317|EPI_ISL_1220027|B.1.349|2020-06-05	USA	TX-DSHS-3317	EPI_ISL_1220027	B.1.349	2020-06-05
USA|TX-HMH-2633|EPI_ISL_545440|B.1.432|2020-06-05	USA	TX-HMH-2633	EPI_ISL_545440	B.1.432	2020-06-05
England|BIRM-61243|EPI_ISL_559078|B.1.1.107|2020-06-06	England	BIRM-61243	EPI_ISL_559078	B.1.1.107	2020-06-06
Mexico|CMX-INER-0132|EPI_ISL_837729|B.1.1.222|2020-06-06	Mexico	CMX-INER-0132	EPI_ISL_837729	B.1.1.222	2020-06-06
Mexico|CMX-INER-0133|EPI_ISL_837730|B.1.1.222|2020-06-06	Mexico	CMX-INER-0133	EPI_ISL_837730	B.1.1.222	2020-06-06
USA|WA-UW-10459|EPI_ISL_570314|B.1.1.52|2020-06-07	USA	WA-UW-10459	EPI_ISL_570314	B.1.1.52	2020-06-07
USA|FL-BPHL-0985|EPI_ISL_517875|B.1.1.180|2020-06-08	USA	FL-BPHL-0985	EPI_ISL_517875	B.1.1.180	2020-06-08
Mexico|CMX-INMEGEN-04-07-34|EPI_ISL_4219955|B.1.1.222|2020-06-08	Mexico	CMX-INMEGEN-04-07-34	EPI_ISL_4219955	B.1.1.222	2020-06-08
Mexico|GRO-InDRE-IBT-129|EPI_ISL_1301589|B.1.1.222|2020-06-08	Mexico	GRO-InDRE-IBT-129	EPI_ISL_1301589	B.1.1.222	2020-06-08
Mexico|CMX-INMEGEN-04-05-117|EPI_ISL_4219853|B.1.1.222|2020-06-08	Mexico	CMX-INMEGEN-04-05-117	EPI_ISL_4219853	B.1.1.222	2020-06-08
USA|KY-KSPHL-100038|EPI_ISL_966373|B.1.1.437|2020-06-08	USA	KY-KSPHL-100038	EPI_ISL_966373	B.1.1.437	2020-06-08
Egypt|MASRI-C5-013|EPI_ISL_1109628|B.1.36.38|2020-06-08	Egypt	MASRI-C5-013	EPI_ISL_1109628	B.1.36.38	2020-06-08
Australia|NSW598|EPI_ISL_478710|B.1.438|2020-06-08	Australia	NSW598	EPI_ISL_478710	B.1.438	2020-06-08
England|MILK-957D82|EPI_ISL_554634|B.1.1.15|2020-06-09	England	MILK-957D82	EPI_ISL_554634	B.1.1.15	2020-06-09
Mexico|CMX-INER-IBT-1079|EPI_ISL_6316617|B.1.1.222|2020-06-09	Mexico	CMX-INER-IBT-1079	EPI_ISL_6316617	B.1.1.222	2020-06-09
Mexico|CMX-INER-IBT-1077|EPI_ISL_6316615|B.1.1.222|2020-06-09	Mexico	CMX-INER-IBT-1077	EPI_ISL_6316615	B.1.1.222	2020-06-09
Mexico|CMX-INMEGEN-04-05-156|EPI_ISL_4219890|B.1.1.222|2020-06-09	Mexico	CMX-INMEGEN-04-05-156	EPI_ISL_4219890	B.1.1.222	2020-06-09
Mexico|CMX-INMEGEN-04-05-164|EPI_ISL_4219898|B.1.1.222|2020-06-09	Mexico	CMX-INMEGEN-04-05-164	EPI_ISL_4219898	B.1.1.222	2020-06-09
Mexico|CMX-INER-IBT-1078|EPI_ISL_6316616|B.1.1.222|2020-06-09	Mexico	CMX-INER-IBT-1078	EPI_ISL_6316616	B.1.1.222	2020-06-09
Mexico|CMX-INMEGEN-04-05-188|EPI_ISL_4219922|B.1.1.222|2020-06-09	Mexico	CMX-INMEGEN-04-05-188	EPI_ISL_4219922	B.1.1.222	2020-06-09
Mexico|CMX-INMEGEN-04-07-37|EPI_ISL_4219958|B.1.1.222|2020-06-09	Mexico	CMX-INMEGEN-04-07-37	EPI_ISL_4219958	B.1.1.222	2020-06-09
Russia|SPE-RII-22478V|EPI_ISL_524045|B.1.1.407|2020-06-09	Russia	SPE-RII-22478V	EPI_ISL_524045	B.1.1.407	2020-06-09
England|MILK-9586FF|EPI_ISL_554831|B.1.407|2020-06-09	England	MILK-9586FF	EPI_ISL_554831	B.1.407	2020-06-09
France|IDF-PSL-384|EPI_ISL_1015121|B.1.466.1|2020-06-09	France	IDF-PSL-384	EPI_ISL_1015121	B.1.466.1	2020-06-09
Canada|Qc-CHUM-2016103625A|EPI_ISL_825829|B.1.611|2020-06-09	Canada	Qc-CHUM-2016103625A	EPI_ISL_825829	B.1.611	2020-06-09
Mexico|CMX-INER-IBT-1082|EPI_ISL_6316620|B.1.1.222|2020-06-10	Mexico	CMX-INER-IBT-1082	EPI_ISL_6316620	B.1.1.222	2020-06-10
Mexico|CMX-INMEGEN-04-05-149|EPI_ISL_4219884|B.1.1.222|2020-06-10	Mexico	CMX-INMEGEN-04-05-149	EPI_ISL_4219884	B.1.1.222	2020-06-10
Mexico|CMX-INMEGEN-04-05-133|EPI_ISL_4219868|B.1.1.222|2020-06-10	Mexico	CMX-INMEGEN-04-05-133	EPI_ISL_4219868	B.1.1.222	2020-06-10
Mexico|CMX-INMEGEN-04-05-173|EPI_ISL_4219907|B.1.1.222|2020-06-10	Mexico	CMX-INMEGEN-04-05-173	EPI_ISL_4219907	B.1.1.222	2020-06-10
Mexico|CMX-INMEGEN-04-05-157|EPI_ISL_4219891|B.1.1.222|2020-06-10	Mexico	CMX-INMEGEN-04-05-157	EPI_ISL_4219891	B.1.1.222	2020-06-10
Mexico|CMX-INER-0137|EPI_ISL_837734|B.1.1.222|2020-06-10	Mexico	CMX-INER-0137	EPI_ISL_837734	B.1.1.222	2020-06-10
USA|TX-HMH-3163|EPI_ISL_544039|B.1.285|2020-06-10	USA	TX-HMH-3163	EPI_ISL_544039	B.1.285	2020-06-10
USA|CA-ALSR-4125|EPI_ISL_648834|B.1.556|2020-06-10	USA	CA-ALSR-4125	EPI_ISL_648834	B.1.556	2020-06-10
Mexico|CMX-INER-IBT-1073|EPI_ISL_6316611|B.1.1.222|2020-06-11	Mexico	CMX-INER-IBT-1073	EPI_ISL_6316611	B.1.1.222	2020-06-11
USA|un-UW-10902|EPI_ISL_576400|B.1.1.312|2020-06-11	USA	un-UW-10902	EPI_ISL_576400	B.1.1.312	2020-06-11
Wales|PHWC-166878|EPI_ISL_494051|B.1.1.38|2020-06-11	Wales	PHWC-166878	EPI_ISL_494051	B.1.1.38	2020-06-11
NorthMacedonia|3122|EPI_ISL_516421|B.1.1.430|2020-06-11	NorthMacedonia	3122	EPI_ISL_516421	B.1.1.430	2020-06-11
USA|CA-ALSR-2190|EPI_ISL_635381|B.1.1.380|2020-06-12	USA	CA-ALSR-2190	EPI_ISL_635381	B.1.1.380	2020-06-12
Mexico|CMX-INER-IBT-1083|EPI_ISL_6316621|B.1.1.222|2020-06-13	Mexico	CMX-INER-IBT-1083	EPI_ISL_6316621	B.1.1.222	2020-06-13
England|ALDP-95AA1F|EPI_ISL_554886|B.1.1.227|2020-06-13	England	ALDP-95AA1F	EPI_ISL_554886	B.1.1.227	2020-06-13
USA|AZ-TG375489|EPI_ISL_914336|B.1.595.2|2020-06-14	USA	AZ-TG375489	EPI_ISL_914336	B.1.595.2	2020-06-14
Mexico|CMX-INER-0139|EPI_ISL_837735|B.1.1.222|2020-06-15	Mexico	CMX-INER-0139	EPI_ISL_837735	B.1.1.222	2020-06-15
Mexico|CMX-INER-IBT-1086|EPI_ISL_6316821|B.1.1.222|2020-06-15	Mexico	CMX-INER-IBT-1086	EPI_ISL_6316821	B.1.1.222	2020-06-15
USA|TX-HMH-3659|EPI_ISL_543103|B.1.1.413|2020-06-15	USA	TX-HMH-3659	EPI_ISL_543103	B.1.1.413	2020-06-15
SouthAfrica|KRISP-0260|EPI_ISL_482730|B.1.140|2020-06-15	SouthAfrica	KRISP-0260	EPI_ISL_482730	B.1.140	2020-06-15
USA|TX-HMH-3627|EPI_ISL_543079|B.1.571|2020-06-15	USA	TX-HMH-3627	EPI_ISL_543079	B.1.571	2020-06-15
Sweden|20-52071|EPI_ISL_510871|B.1.614|2020-06-15	Sweden	20-52071	EPI_ISL_510871	B.1.614	2020-06-15
Mexico|CMX-INMEGEN-04-07-69|EPI_ISL_4219990|B.1.1.222|2020-06-16	Mexico	CMX-INMEGEN-04-07-69	EPI_ISL_4219990	B.1.1.222	2020-06-16
Mexico|CMX-INMEGEN-04-07-74|EPI_ISL_4219995|B.1.1.222|2020-06-16	Mexico	CMX-INMEGEN-04-07-74	EPI_ISL_4219995	B.1.1.222	2020-06-16
USA|TX-HMH-4004-|EPI_ISL_543290|B.1.1.342|2020-06-16	USA	TX-HMH-4004-	EPI_ISL_543290	B.1.1.342	2020-06-16
USA|CA-ALSR-3570|EPI_ISL_636089|B.1.1.93|2020-06-16	USA	CA-ALSR-3570	EPI_ISL_636089	B.1.1.93	2020-06-16
USA|WI-UW-465|EPI_ISL_484840|B.1.294|2020-06-16	USA	WI-UW-465	EPI_ISL_484840	B.1.294	2020-06-16
USA|CA-CZB-9973|EPI_ISL_857000|B.1.1.139|2020-06-17	USA	CA-CZB-9973	EPI_ISL_857000	B.1.1.139	2020-06-17
USA|OR-OHSU-0675|EPI_ISL_525883|B.1.1.222|2020-06-17	USA	OR-OHSU-0675	EPI_ISL_525883	B.1.1.222	2020-06-17
Mexico|CMX-INER-IBT-1088|EPI_ISL_6316624|B.1.1.222|2020-06-17	Mexico	CMX-INER-IBT-1088	EPI_ISL_6316624	B.1.1.222	2020-06-17
Mexico|CMX-INER-0142|EPI_ISL_837738|B.1.1.222|2020-06-18	Mexico	CMX-INER-0142	EPI_ISL_837738	B.1.1.222	2020-06-18
Mexico|CMX-INMEGEN-04-05-57|EPI_ISL_4219813|B.1.1.222|2020-06-18	Mexico	CMX-INMEGEN-04-05-57	EPI_ISL_4219813	B.1.1.222	2020-06-18
SouthAfrica|KRISP-0343|EPI_ISL_495519|B.1.1.412|2020-06-18	SouthAfrica	KRISP-0343	EPI_ISL_495519	B.1.1.412	2020-06-18
Mexico|CMX-INMEGEN-04-05-91|EPI_ISL_4219829|B.1.1.222|2020-06-19	Mexico	CMX-INMEGEN-04-05-91	EPI_ISL_4219829	B.1.1.222	2020-06-19
Germany|BAV-PL-virotum-DZBZW|EPI_ISL_1092100|B.1.177.77|2020-06-19	Germany	BAV-PL-virotum-DZBZW	EPI_ISL_1092100	B.1.177.77	2020-06-19
Norway|3171|EPI_ISL_549173|B.1.242|2020-06-19	Norway	3171	EPI_ISL_549173	B.1.242	2020-06-19
USA|AZ-TG394340|EPI_ISL_694719|B.1.363|2020-06-19	USA	AZ-TG394340	EPI_ISL_694719	B.1.363	2020-06-19
USA|TX-DSHS-2782|EPI_ISL_1184345|B.1.402|2020-06-19	USA	TX-DSHS-2782	EPI_ISL_1184345	B.1.402	2020-06-19
Mexico|CMX-INMEGEN-04-05-94|EPI_ISL_4219832|B.1.1.222|2020-06-20	Mexico	CMX-INMEGEN-04-05-94	EPI_ISL_4219832	B.1.1.222	2020-06-20
USA|TX-DSHS-1772|EPI_ISL_710412|B.1.608|2020-06-20	USA	TX-DSHS-1772	EPI_ISL_710412	B.1.608	2020-06-20
Mexico|CMX-INER-IBT-1097|EPI_ISL_6316632|B.1.1.222|2020-06-22	Mexico	CMX-INER-IBT-1097	EPI_ISL_6316632	B.1.1.222	2020-06-22
Mexico|CMX-INER-0146|EPI_ISL_837742|B.1.1.222|2020-06-22	Mexico	CMX-INER-0146	EPI_ISL_837742	B.1.1.222	2020-06-22
Mexico|CMX-INER-0145|EPI_ISL_837741|B.1.1.222|2020-06-22	Mexico	CMX-INER-0145	EPI_ISL_837741	B.1.1.222	2020-06-22
England|ALDP-90F624|EPI_ISL_551461|B.1.1.286|2020-06-22	England	ALDP-90F624	EPI_ISL_551461	B.1.1.286	2020-06-22
Japan|PG-3143|EPI_ISL_691265|B.1.1.305|2020-06-22	Japan	PG-3143	EPI_ISL_691265	B.1.1.305	2020-06-22
SouthAfrica|KRISP-0378|EPI_ISL_487327|B.1.1.84|2020-06-22	SouthAfrica	KRISP-0378	EPI_ISL_487327	B.1.1.84	2020-06-22
Bahrain|2|EPI_ISL_486887|AE.2|2020-06-23	Bahrain	2	EPI_ISL_486887	AE.2	2020-06-23
Bahrain|4|EPI_ISL_486889|AE.4|2020-06-23	Bahrain	4	EPI_ISL_486889	AE.4	2020-06-23
Mexico|CMX-INER-IBT-1103|EPI_ISL_6316638|B.1.1.222|2020-06-23	Mexico	CMX-INER-IBT-1103	EPI_ISL_6316638	B.1.1.222	2020-06-23
Mexico|CMX-INER-0147|EPI_ISL_837743|B.1.1.222|2020-06-23	Mexico	CMX-INER-0147	EPI_ISL_837743	B.1.1.222	2020-06-23
Mexico|CMX-INER-IBT-1100|EPI_ISL_6316635|B.1.1.222|2020-06-23	Mexico	CMX-INER-IBT-1100	EPI_ISL_6316635	B.1.1.222	2020-06-23
Canada|ON-UHTC-0277|EPI_ISL_570003|B.1.1.417|2020-06-23	Canada	ON-UHTC-0277	EPI_ISL_570003	B.1.1.417	2020-06-23
Australia|VIC2249|EPI_ISL_521980|B.1.1.431|2020-06-23	Australia	VIC2249	EPI_ISL_521980	B.1.1.431	2020-06-23
Mexico|CMX-INMEGEN-04-07-90|EPI_ISL_4220011|B.1.1.222|2020-06-24	Mexico	CMX-INMEGEN-04-07-90	EPI_ISL_4220011	B.1.1.222	2020-06-24
Mexico|CMX-INMEGEN-04-07-77|EPI_ISL_4219998|B.1.1.222|2020-06-24	Mexico	CMX-INMEGEN-04-07-77	EPI_ISL_4219998	B.1.1.222	2020-06-24
Mexico|CMX-INER-0149|EPI_ISL_837745|B.1.1.222|2020-06-24	Mexico	CMX-INER-0149	EPI_ISL_837745	B.1.1.222	2020-06-24
Mexico|CMX-INMEGEN-04-07-373|EPI_ISL_4220123|B.1.1.222|2020-06-24	Mexico	CMX-INMEGEN-04-07-373	EPI_ISL_4220123	B.1.1.222	2020-06-24
Mexico|CMX-INMEGEN-04-07-83|EPI_ISL_4220004|B.1.1.222|2020-06-24	Mexico	CMX-INMEGEN-04-07-83	EPI_ISL_4220004	B.1.1.222	2020-06-24
Mexico|CMX-INER-0148|EPI_ISL_837744|B.1.1.222|2020-06-24	Mexico	CMX-INER-0148	EPI_ISL_837744	B.1.1.222	2020-06-24
Mexico|CMX-INMEGEN-04-07-94|EPI_ISL_4220015|B.1.1.222|2020-06-24	Mexico	CMX-INMEGEN-04-07-94	EPI_ISL_4220015	B.1.1.222	2020-06-24
Mexico|CMX-INER-IBT-1105|EPI_ISL_6316640|B.1.1.222|2020-06-25	Mexico	CMX-INER-IBT-1105	EPI_ISL_6316640	B.1.1.222	2020-06-25
Mexico|CMX-INMEGEN-04-07-14|EPI_ISL_4219935|B.1.1.222|2020-06-25	Mexico	CMX-INMEGEN-04-07-14	EPI_ISL_4219935	B.1.1.222	2020-06-25
Mexico|CMX-INMEGEN-04-07-10|EPI_ISL_4219933|B.1.1.222|2020-06-25	Mexico	CMX-INMEGEN-04-07-10	EPI_ISL_4219933	B.1.1.222	2020-06-25
Mexico|CMX-INMEGEN-04-07-08|EPI_ISL_4219931|B.1.1.222|2020-06-25	Mexico	CMX-INMEGEN-04-07-08	EPI_ISL_4219931	B.1.1.222	2020-06-25
Mexico|CMX-INMEGEN-04-07-04|EPI_ISL_4219927|B.1.1.222|2020-06-25	Mexico	CMX-INMEGEN-04-07-04	EPI_ISL_4219927	B.1.1.222	2020-06-25
Mexico|CMX-INMEGEN-04-07-16|EPI_ISL_4219937|B.1.1.222|2020-06-25	Mexico	CMX-INMEGEN-04-07-16	EPI_ISL_4219937	B.1.1.222	2020-06-25
Mexico|CMX-INMEGEN-04-07-15|EPI_ISL_4219936|B.1.1.222|2020-06-25	Mexico	CMX-INMEGEN-04-07-15	EPI_ISL_4219936	B.1.1.222	2020-06-25
Mexico|CMX-INER-0150|EPI_ISL_837746|B.1.1.222|2020-06-25	Mexico	CMX-INER-0150	EPI_ISL_837746	B.1.1.222	2020-06-25
Mexico|CMX-INER-IBT-1111|EPI_ISL_6316844|B.1.1.222|2020-06-26	Mexico	CMX-INER-IBT-1111	EPI_ISL_6316844	B.1.1.222	2020-06-26
Mexico|TAM-UANL-013|EPI_ISL_1091272|B.1.1.222|2020-06-27	Mexico	TAM-UANL-013	EPI_ISL_1091272	B.1.1.222	2020-06-27
Mexico|CMX-INER-IBT-1115|EPI_ISL_6316648|B.1.1.222|2020-06-27	Mexico	CMX-INER-IBT-1115	EPI_ISL_6316648	B.1.1.222	2020-06-27
USA|WA-UW-12364|EPI_ISL_570516|B.1.1.337|2020-06-27	USA	WA-UW-12364	EPI_ISL_570516	B.1.1.337	2020-06-27
USA|FL-BPHL-0758|EPI_ISL_512564|B.1.280|2020-06-27	USA	FL-BPHL-0758	EPI_ISL_512564	B.1.280	2020-06-27
USA|TX-HMH-6927|EPI_ISL_546358|B.1.569|2020-06-27	USA	TX-HMH-6927	EPI_ISL_546358	B.1.569	2020-06-27
Zambia|ZMB-31145|EPI_ISL_977392|AE.5|2020-06-28	Zambia	ZMB-31145	EPI_ISL_977392	AE.5	2020-06-28
Mexico|CMX-INER-IBT-1107|EPI_ISL_6316642|B.1.1.222|2020-06-28	Mexico	CMX-INER-IBT-1107	EPI_ISL_6316642	B.1.1.222	2020-06-28
Mexico|CMX-INER-IBT-1117|EPI_ISL_6316650|B.1.1.222|2020-06-29	Mexico	CMX-INER-IBT-1117	EPI_ISL_6316650	B.1.1.222	2020-06-29
USA|CA-IGI-0340|EPI_ISL_576529|B.1.309|2020-06-29	USA	CA-IGI-0340	EPI_ISL_576529	B.1.309	2020-06-29
Mexico|CMX-INMEGEN-04-05-158|EPI_ISL_4219892|B.1.1.222|2020-06-30	Mexico	CMX-INMEGEN-04-05-158	EPI_ISL_4219892	B.1.1.222	2020-06-30
Mexico|CMX-INMEGEN-04-05-166|EPI_ISL_4219900|B.1.1.222|2020-06-30	Mexico	CMX-INMEGEN-04-05-166	EPI_ISL_4219900	B.1.1.222	2020-06-30
Mexico|CMX-INMEGEN-04-05-126|EPI_ISL_4219862|B.1.1.222|2020-06-30	Mexico	CMX-INMEGEN-04-05-126	EPI_ISL_4219862	B.1.1.222	2020-06-30
Mexico|CMX-INER-IBT-1118|EPI_ISL_6316651|B.1.1.222|2020-06-30	Mexico	CMX-INER-IBT-1118	EPI_ISL_6316651	B.1.1.222	2020-06-30
Mexico|CMX-INER-0153|EPI_ISL_837749|B.1.1.222|2020-06-30	Mexico	CMX-INER-0153	EPI_ISL_837749	B.1.1.222	2020-06-30
Mexico|CMX-INMEGEN-04-07-371|EPI_ISL_4220121|B.1.1.222|2020-07-01	Mexico	CMX-INMEGEN-04-07-371	EPI_ISL_4220121	B.1.1.222	2020-07-01
Mexico|CMX-INMEGEN-04-07-112|EPI_ISL_4220033|B.1.1.222|2020-07-01	Mexico	CMX-INMEGEN-04-07-112	EPI_ISL_4220033	B.1.1.222	2020-07-01
Mexico|CMX-INER-0154|EPI_ISL_837750|B.1.1.222|2020-07-01	Mexico	CMX-INER-0154	EPI_ISL_837750	B.1.1.222	2020-07-01
Mexico|CMX-INMEGEN-04-07-368|EPI_ISL_4220119|B.1.1.222|2020-07-01	Mexico	CMX-INMEGEN-04-07-368	EPI_ISL_4220119	B.1.1.222	2020-07-01
Mexico|CMX-INMEGEN-04-07-184|EPI_ISL_4220062|B.1.1.222|2020-07-01	Mexico	CMX-INMEGEN-04-07-184	EPI_ISL_4220062	B.1.1.222	2020-07-01
Mexico|CMX-INMEGEN-04-07-369|EPI_ISL_4220120|B.1.1.222|2020-07-01	Mexico	CMX-INMEGEN-04-07-369	EPI_ISL_4220120	B.1.1.222	2020-07-01
Mexico|CMX-INER-IBT-1125|EPI_ISL_6316802|B.1.1.222|2020-07-01	Mexico	CMX-INER-IBT-1125	EPI_ISL_6316802	B.1.1.222	2020-07-01
Mexico|CMX-INMEGEN-04-07-367|EPI_ISL_4220118|B.1.1.222|2020-07-01	Mexico	CMX-INMEGEN-04-07-367	EPI_ISL_4220118	B.1.1.222	2020-07-01
Switzerland|VD-ETHZ-180039|EPI_ISL_489977|B.1.1.47|2020-07-01	Switzerland	VD-ETHZ-180039	EPI_ISL_489977	B.1.1.47	2020-07-01
Australia|NSW633|EPI_ISL_490042|B.1.36.1|2020-07-01	Australia	NSW633	EPI_ISL_490042	B.1.36.1	2020-07-01
USA|LA-EVTL612|EPI_ISL_579016|B.1.541|2020-07-01	USA	LA-EVTL612	EPI_ISL_579016	B.1.541	2020-07-01
Mexico|CMX-INMEGEN-04-07-179|EPI_ISL_4220058|B.1.1.222|2020-07-02	Mexico	CMX-INMEGEN-04-07-179	EPI_ISL_4220058	B.1.1.222	2020-07-02
USA|CA-CDC-IBX033652600676|EPI_ISL_1512787|B.1.1.222|2020-07-02	USA	CA-CDC-IBX033652600676	EPI_ISL_1512787	B.1.1.222	2020-07-02
Mexico|CMX-INMEGEN-04-07-120|EPI_ISL_4220040|B.1.1.222|2020-07-02	Mexico	CMX-INMEGEN-04-07-120	EPI_ISL_4220040	B.1.1.222	2020-07-02
Mexico|CMX-INMEGEN-04-07-121|EPI_ISL_4220041|B.1.1.222|2020-07-02	Mexico	CMX-INMEGEN-04-07-121	EPI_ISL_4220041	B.1.1.222	2020-07-02
Mexico|CMX-INMEGEN-04-07-180|EPI_ISL_4220059|B.1.1.222|2020-07-02	Mexico	CMX-INMEGEN-04-07-180	EPI_ISL_4220059	B.1.1.222	2020-07-02
Mexico|CMX-INMEGEN-04-07-178|EPI_ISL_4220057|B.1.1.222|2020-07-02	Mexico	CMX-INMEGEN-04-07-178	EPI_ISL_4220057	B.1.1.222	2020-07-02
Mexico|CMX-INMEGEN-04-07-114|EPI_ISL_4220035|B.1.1.222|2020-07-03	Mexico	CMX-INMEGEN-04-07-114	EPI_ISL_4220035	B.1.1.222	2020-07-03
Mexico|CMX-INER-IBT-1136|EPI_ISL_6316666|B.1.1.222|2020-07-03	Mexico	CMX-INER-IBT-1136	EPI_ISL_6316666	B.1.1.222	2020-07-03
Mexico|CMX-INER-0157|EPI_ISL_837753|B.1.1.222|2020-07-03	Mexico	CMX-INER-0157	EPI_ISL_837753	B.1.1.222	2020-07-03
Mexico|CMX-INMEGEN-04-07-176|EPI_ISL_4220055|B.1.1.222|2020-07-03	Mexico	CMX-INMEGEN-04-07-176	EPI_ISL_4220055	B.1.1.222	2020-07-03
Mexico|CMX-INMEGEN-04-07-177|EPI_ISL_4220056|B.1.1.222|2020-07-03	Mexico	CMX-INMEGEN-04-07-177	EPI_ISL_4220056	B.1.1.222	2020-07-03
Mexico|CMX-INER-0158|EPI_ISL_837754|B.1.1.222|2020-07-03	Mexico	CMX-INER-0158	EPI_ISL_837754	B.1.1.222	2020-07-03
Mexico|CMX-INMEGEN-04-05-182|EPI_ISL_4219916|B.1.1.222|2020-07-03	Mexico	CMX-INMEGEN-04-05-182	EPI_ISL_4219916	B.1.1.222	2020-07-03
Mexico|CMX-INMEGEN-04-07-128|EPI_ISL_4220047|B.1.1.222|2020-07-03	Mexico	CMX-INMEGEN-04-07-128	EPI_ISL_4220047	B.1.1.222	2020-07-03
Uganda|UG102|EPI_ISL_738009|B.1.393|2020-07-04	Uganda	UG102	EPI_ISL_738009	B.1.393	2020-07-04
England|MILK-6422BB|EPI_ISL_556109|B.1.532|2020-07-04	England	MILK-6422BB	EPI_ISL_556109	B.1.532	2020-07-04
Mexico|CMX-INER-IBT-1140|EPI_ISL_6316675|B.1.1.222|2020-07-06	Mexico	CMX-INER-IBT-1140	EPI_ISL_6316675	B.1.1.222	2020-07-06
Mexico|CMX-INMEGEN-04-07-109|EPI_ISL_4220030|B.1.1.222|2020-07-06	Mexico	CMX-INMEGEN-04-07-109	EPI_ISL_4220030	B.1.1.222	2020-07-06
Mexico|CMX-INMEGEN-04-07-97|EPI_ISL_4220018|B.1.1.222|2020-07-06	Mexico	CMX-INMEGEN-04-07-97	EPI_ISL_4220018	B.1.1.222	2020-07-06
Mexico|CMX-INMEGEN-04-07-98|EPI_ISL_4220019|B.1.1.222|2020-07-06	Mexico	CMX-INMEGEN-04-07-98	EPI_ISL_4220019	B.1.1.222	2020-07-06
Mexico|CMX-INER-IBT-1141|EPI_ISL_6316681|B.1.1.222|2020-07-06	Mexico	CMX-INER-IBT-1141	EPI_ISL_6316681	B.1.1.222	2020-07-06
Mexico|CMX-INMEGEN-04-07-110|EPI_ISL_4220031|B.1.1.222|2020-07-06	Mexico	CMX-INMEGEN-04-07-110	EPI_ISL_4220031	B.1.1.222	2020-07-06
Mexico|CMX-INMEGEN-04-07-96|EPI_ISL_4220017|B.1.1.222|2020-07-06	Mexico	CMX-INMEGEN-04-07-96	EPI_ISL_4220017	B.1.1.222	2020-07-06
Mexico|CMX-INMEGEN-04-07-102|EPI_ISL_4220023|B.1.1.222|2020-07-06	Mexico	CMX-INMEGEN-04-07-102	EPI_ISL_4220023	B.1.1.222	2020-07-06
England|MILK-622EBD|EPI_ISL_557984|B.1.258.3|2020-07-06	England	MILK-622EBD	EPI_ISL_557984	B.1.258.3	2020-07-06
Sweden|20-52355|EPI_ISL_548256|AN.1|2020-07-07	Sweden	20-52355	EPI_ISL_548256	AN.1	2020-07-07
Mexico|CMX-INER-IBT-1145|EPI_ISL_6316709|B.1.1.222|2020-07-07	Mexico	CMX-INER-IBT-1145	EPI_ISL_6316709	B.1.1.222	2020-07-07
Mexico|CMX-INER-IBT-1147|EPI_ISL_6316724|B.1.1.222|2020-07-08	Mexico	CMX-INER-IBT-1147	EPI_ISL_6316724	B.1.1.222	2020-07-08
Mexico|CMX-INER-IBT-1146|EPI_ISL_6316716|B.1.1.222|2020-07-08	Mexico	CMX-INER-IBT-1146	EPI_ISL_6316716	B.1.1.222	2020-07-08
USA|MD-MDH-0130|EPI_ISL_524895|B.1.436|2020-07-08	USA	MD-MDH-0130	EPI_ISL_524895	B.1.436	2020-07-08
Mexico|CMX-INER-IBT-1150|EPI_ISL_6316739|B.1.1.222|2020-07-09	Mexico	CMX-INER-IBT-1150	EPI_ISL_6316739	B.1.1.222	2020-07-09
USA|CA-ALSR-2598|EPI_ISL_635578|B.1.1.222|2020-07-09	USA	CA-ALSR-2598	EPI_ISL_635578	B.1.1.222	2020-07-09
Mexico|CMX-INER-IBT-1159|EPI_ISL_6316814|B.1.1.222|2020-07-10	Mexico	CMX-INER-IBT-1159	EPI_ISL_6316814	B.1.1.222	2020-07-10
USA|TX-HMH-MCoV-17017|EPI_ISL_1202728|B.1.1.222|2020-07-10	USA	TX-HMH-MCoV-17017	EPI_ISL_1202728	B.1.1.222	2020-07-10
England|HECH-259A4F5|EPI_ISL_529663|B.1.1.408|2020-07-11	England	HECH-259A4F5	EPI_ISL_529663	B.1.1.408	2020-07-11
Mexico|CMX-INER-IBT-1158|EPI_ISL_6316787|B.1.1.222|2020-07-12	Mexico	CMX-INER-IBT-1158	EPI_ISL_6316787	B.1.1.222	2020-07-12
Mexico|CMX-INER-0168|EPI_ISL_837764|B.1.1.222|2020-07-13	Mexico	CMX-INER-0168	EPI_ISL_837764	B.1.1.222	2020-07-13
Mexico|CMX-INER-0169|EPI_ISL_837765|B.1.1.222|2020-07-13	Mexico	CMX-INER-0169	EPI_ISL_837765	B.1.1.222	2020-07-13
Switzerland|GE-ETHZ-200011|EPI_ISL_510700|B.1.367|2020-07-13	Switzerland	GE-ETHZ-200011	EPI_ISL_510700	B.1.367	2020-07-13
Mexico|CMX-INER-0170|EPI_ISL_837766|B.1.1.222|2020-07-14	Mexico	CMX-INER-0170	EPI_ISL_837766	B.1.1.222	2020-07-14
Mexico|CMX-INMEGEN-04-05-152|EPI_ISL_4219887|B.1.1.222|2020-07-15	Mexico	CMX-INMEGEN-04-05-152	EPI_ISL_4219887	B.1.1.222	2020-07-15
USA|CA-CZB-33560|EPI_ISL_2497842|B.1.1.222|2020-07-15	USA	CA-CZB-33560	EPI_ISL_2497842	B.1.1.222	2020-07-15
Mexico|CMX-INMEGEN-04-05-120|EPI_ISL_4219856|B.1.1.222|2020-07-15	Mexico	CMX-INMEGEN-04-05-120	EPI_ISL_4219856	B.1.1.222	2020-07-15
Mexico|CMX-INMEGEN-04-05-128|EPI_ISL_4219864|B.1.1.222|2020-07-15	Mexico	CMX-INMEGEN-04-05-128	EPI_ISL_4219864	B.1.1.222	2020-07-15
Mexico|CMX-INMEGEN-04-05-167|EPI_ISL_4219901|B.1.1.222|2020-07-15	Mexico	CMX-INMEGEN-04-05-167	EPI_ISL_4219901	B.1.1.222	2020-07-15
Mexico|CMX-InDRE-IBT-126|EPI_ISL_1301586|B.1.1.222|2020-07-16	Mexico	CMX-InDRE-IBT-126	EPI_ISL_1301586	B.1.1.222	2020-07-16
Mexico|CMX-INER-0174|EPI_ISL_837770|B.1.1.222|2020-07-16	Mexico	CMX-INER-0174	EPI_ISL_837770	B.1.1.222	2020-07-16
Belgium|ULG-10254|EPI_ISL_515061|B.1.1.297|2020-07-16	Belgium	ULG-10254	EPI_ISL_515061	B.1.1.297	2020-07-16
England|MILK-8274D2|EPI_ISL_557211|B.1.1.325|2020-07-16	England	MILK-8274D2	EPI_ISL_557211	B.1.1.325	2020-07-16
Mexico|CMX-INER-IBT-0970|EPI_ISL_5196737|B.1.1.222|2020-07-17	Mexico	CMX-INER-IBT-0970	EPI_ISL_5196737	B.1.1.222	2020-07-17
Mexico|CMX-INER-IBT-0971|EPI_ISL_5196738|B.1.1.222|2020-07-17	Mexico	CMX-INER-IBT-0971	EPI_ISL_5196738	B.1.1.222	2020-07-17
Mexico|CMX-INER-0178|EPI_ISL_837774|B.1.1.222|2020-07-18	Mexico	CMX-INER-0178	EPI_ISL_837774	B.1.1.222	2020-07-18
Mexico|CMX-INER-IBT-0967|EPI_ISL_5196735|B.1.1.222|2020-07-18	Mexico	CMX-INER-IBT-0967	EPI_ISL_5196735	B.1.1.222	2020-07-18
Mexico|CMX-INER-IBT-0591|EPI_ISL_4496545|B.1.1.222|2020-07-20	Mexico	CMX-INER-IBT-0591	EPI_ISL_4496545	B.1.1.222	2020-07-20
USA|IL-IDPH-BUR-S-0001413|EPI_ISL_1032830|B.1.1.222|2020-07-20	USA	IL-IDPH-BUR-S-0001413	EPI_ISL_1032830	B.1.1.222	2020-07-20
Mexico|CMX-INER-0182|EPI_ISL_837778|B.1.1.222|2020-07-20	Mexico	CMX-INER-0182	EPI_ISL_837778	B.1.1.222	2020-07-20
Mexico|CMX-INER-0181|EPI_ISL_837777|B.1.1.222|2020-07-20	Mexico	CMX-INER-0181	EPI_ISL_837777	B.1.1.222	2020-07-20
England|NORT-286167|EPI_ISL_573313|AD.2|2020-07-21	England	NORT-286167	EPI_ISL_573313	AD.2	2020-07-21
Mexico|CMX-INER-IBT-0593|EPI_ISL_4496547|B.1.1.222|2020-07-21	Mexico	CMX-INER-IBT-0593	EPI_ISL_4496547	B.1.1.222	2020-07-21
Mexico|CMX-INER-IBT-0594|EPI_ISL_4496548|B.1.1.222|2020-07-21	Mexico	CMX-INER-IBT-0594	EPI_ISL_4496548	B.1.1.222	2020-07-21
USA|CA-ALSR-2692|EPI_ISL_635635|B.1.1.512|2020-07-21	USA	CA-ALSR-2692	EPI_ISL_635635	B.1.1.512	2020-07-21
Mexico|CMX-INMEGEN-04-07-142|EPI_ISL_4220048|B.1.1.222|2020-07-22	Mexico	CMX-INMEGEN-04-07-142	EPI_ISL_4220048	B.1.1.222	2020-07-22
Mexico|CMX-INER-IBT-0595|EPI_ISL_4496549|B.1.1.222|2020-07-22	Mexico	CMX-INER-IBT-0595	EPI_ISL_4496549	B.1.1.222	2020-07-22
USA|TX-HMH-MCoV-40780|EPI_ISL_2223964|B.1.1.222|2020-07-22	USA	TX-HMH-MCoV-40780	EPI_ISL_2223964	B.1.1.222	2020-07-22
USA|TX-HMH-MCoV-46048|EPI_ISL_5086176|B.1.1.222|2020-07-23	USA	TX-HMH-MCoV-46048	EPI_ISL_5086176	B.1.1.222	2020-07-23
USA|OR-OHSU-1701|EPI_ISL_526007|B.1.1.222|2020-07-23	USA	OR-OHSU-1701	EPI_ISL_526007	B.1.1.222	2020-07-23
Mexico|CMX-INER-IBT-0599|EPI_ISL_4496553|B.1.1.222|2020-07-23	Mexico	CMX-INER-IBT-0599	EPI_ISL_4496553	B.1.1.222	2020-07-23
Mexico|CMX-INER-0185|EPI_ISL_837781|B.1.1.222|2020-07-23	Mexico	CMX-INER-0185	EPI_ISL_837781	B.1.1.222	2020-07-23
Mexico|CMX-INER-0187|EPI_ISL_837783|B.1.1.222|2020-07-24	Mexico	CMX-INER-0187	EPI_ISL_837783	B.1.1.222	2020-07-24
Mexico|CMX-INER-0186|EPI_ISL_837782|B.1.1.222|2020-07-24	Mexico	CMX-INER-0186	EPI_ISL_837782	B.1.1.222	2020-07-24
Mexico|CMX-INER-IBT-0600|EPI_ISL_4496554|B.1.1.222|2020-07-24	Mexico	CMX-INER-IBT-0600	EPI_ISL_4496554	B.1.1.222	2020-07-24
Mexico|MEX-InDRE_318|EPI_ISL_1060758|B.1.1.222|2020-07-25	Mexico	MEX-InDRE_318	EPI_ISL_1060758	B.1.1.222	2020-07-25
Mexico|CMX-INER-IBT-0601|EPI_ISL_4496555|B.1.1.222|2020-07-25	Mexico	CMX-INER-IBT-0601	EPI_ISL_4496555	B.1.1.222	2020-07-25
Japan|PG-4164|EPI_ISL_692403|B.1.1.311|2020-07-25	Japan	PG-4164	EPI_ISL_692403	B.1.1.311	2020-07-25
Russia|SVE-RII-MH216S|EPI_ISL_732995|B.1.1.427|2020-07-25	Russia	SVE-RII-MH216S	EPI_ISL_732995	B.1.1.427	2020-07-25
USA|MI-MDHHS-SC21735|EPI_ISL_529854|B.1.1.72|2020-07-25	USA	MI-MDHHS-SC21735	EPI_ISL_529854	B.1.1.72	2020-07-25
Mexico|CMX-INER-IBT-0602|EPI_ISL_4496556|B.1.1.222|2020-07-26	Mexico	CMX-INER-IBT-0602	EPI_ISL_4496556	B.1.1.222	2020-07-26
Mexico|GRO-InDRE_385|EPI_ISL_1054992|B.1.1.222|2020-07-26	Mexico	GRO-InDRE_385	EPI_ISL_1054992	B.1.1.222	2020-07-26
Mexico|BCN-InDRE_256|EPI_ISL_1054984|B.1.1.222|2020-07-27	Mexico	BCN-InDRE_256	EPI_ISL_1054984	B.1.1.222	2020-07-27
Mexico|HID-InDRE_386|EPI_ISL_1054987|B.1.1.222|2020-07-27	Mexico	HID-InDRE_386	EPI_ISL_1054987	B.1.1.222	2020-07-27
Mexico|CMX-INER-IBT-0606|EPI_ISL_4496560|B.1.1.222|2020-07-27	Mexico	CMX-INER-IBT-0606	EPI_ISL_4496560	B.1.1.222	2020-07-27
Mexico|OAX-InDRE_400|EPI_ISL_1054989|B.1.1.222|2020-07-27	Mexico	OAX-InDRE_400	EPI_ISL_1054989	B.1.1.222	2020-07-27
France|IDF-PSL-328|EPI_ISL_1015275|B.1.1.234|2020-07-27	France	IDF-PSL-328	EPI_ISL_1015275	B.1.1.234	2020-07-27
Egypt|CCHE57357-A-48|EPI_ISL_812821|A.28|2020-07-28	Egypt	CCHE57357-A-48	EPI_ISL_812821	A.28	2020-07-28
Mexico|CMX-INER-IBT-0617|EPI_ISL_4496571|B.1.1.222|2020-07-28	Mexico	CMX-INER-IBT-0617	EPI_ISL_4496571	B.1.1.222	2020-07-28
USA|OR-OHSU-1879|EPI_ISL_526057|B.1.1.222|2020-07-28	USA	OR-OHSU-1879	EPI_ISL_526057	B.1.1.222	2020-07-28
USA|OR-OHSU-1889|EPI_ISL_526060|B.1.1.222|2020-07-28	USA	OR-OHSU-1889	EPI_ISL_526060	B.1.1.222	2020-07-28
Mexico|SLP-InDRE_260|EPI_ISL_1054978|B.1.1.222|2020-07-28	Mexico	SLP-InDRE_260	EPI_ISL_1054978	B.1.1.222	2020-07-28
Mexico|CMX-INER-0191|EPI_ISL_837787|B.1.1.222|2020-07-29	Mexico	CMX-INER-0191	EPI_ISL_837787	B.1.1.222	2020-07-29
Mexico|SON-InDRE_398|EPI_ISL_1054975|B.1.1.222|2020-07-29	Mexico	SON-InDRE_398	EPI_ISL_1054975	B.1.1.222	2020-07-29
Norway|2959|EPI_ISL_549081|B.1.177.14|2020-07-29	Norway	2959	EPI_ISL_549081	B.1.177.14	2020-07-29
Mexico|CMX-INER-IBT-0615|EPI_ISL_4496569|B.1.1.222|2020-07-30	Mexico	CMX-INER-IBT-0615	EPI_ISL_4496569	B.1.1.222	2020-07-30
USA|OR-OHSU-1985|EPI_ISL_526083|B.1.1.222|2020-07-30	USA	OR-OHSU-1985	EPI_ISL_526083	B.1.1.222	2020-07-30
USA|IL-IDPH-BOO-S-0001552|EPI_ISL_2080136|B.1.1.222|2020-07-30	USA	IL-IDPH-BOO-S-0001552	EPI_ISL_2080136	B.1.1.222	2020-07-30
Mexico|GUA-InDRE_395|EPI_ISL_1054970|B.1.1.222|2020-07-30	Mexico	GUA-InDRE_395	EPI_ISL_1054970	B.1.1.222	2020-07-30
Mexico|PUE-InDRE_381|EPI_ISL_1054968|B.1.1.222|2020-07-30	Mexico	PUE-InDRE_381	EPI_ISL_1054968	B.1.1.222	2020-07-30
Mexico|CMX-INER-0192|EPI_ISL_837788|B.1.1.222|2020-07-30	Mexico	CMX-INER-0192	EPI_ISL_837788	B.1.1.222	2020-07-30
England|QEUH-961848|EPI_ISL_536998|B.1.1.130|2020-07-31	England	QEUH-961848	EPI_ISL_536998	B.1.1.130	2020-07-31
Mexico|CMX-INER-0193|EPI_ISL_837789|B.1.1.222|2020-07-31	Mexico	CMX-INER-0193	EPI_ISL_837789	B.1.1.222	2020-07-31
Mexico|CMX-INER-IBT-0611|EPI_ISL_4496565|B.1.1.222|2020-07-31	Mexico	CMX-INER-IBT-0611	EPI_ISL_4496565	B.1.1.222	2020-07-31
Spain|MD-IBV-99008698|EPI_ISL_654278|B.1.1.222|2020-07-31	Spain	MD-IBV-99008698	EPI_ISL_654278	B.1.1.222	2020-07-31
Germany|HH-HPI-p3007|EPI_ISL_960088|B.1.1.219|2020-08-01	Germany	HH-HPI-p3007	EPI_ISL_960088	B.1.1.219	2020-08-01
Mexico|JAL-InDRE-IBT-139|EPI_ISL_1301711|B.1.1.222|2020-08-01	Mexico	JAL-InDRE-IBT-139	EPI_ISL_1301711	B.1.1.222	2020-08-01
Mexico|CMX-INER-IBT-0607|EPI_ISL_4496561|B.1.1.222|2020-08-01	Mexico	CMX-INER-IBT-0607	EPI_ISL_4496561	B.1.1.222	2020-08-01
USA|FL-B2TM|EPI_ISL_602312|B.1.361|2020-08-02	USA	FL-B2TM	EPI_ISL_602312	B.1.361	2020-08-02
USA|CA-CZB-10874|EPI_ISL_583114|B.1.1.222|2020-08-03	USA	CA-CZB-10874	EPI_ISL_583114	B.1.1.222	2020-08-03
USA|CA-CZB-10878|EPI_ISL_583116|B.1.1.222|2020-08-03	USA	CA-CZB-10878	EPI_ISL_583116	B.1.1.222	2020-08-03
USA|CA-CZB-10876|EPI_ISL_583115|B.1.1.222|2020-08-03	USA	CA-CZB-10876	EPI_ISL_583115	B.1.1.222	2020-08-03
USA|OR-OHSU-2067|EPI_ISL_667106|B.1.1.222|2020-08-03	USA	OR-OHSU-2067	EPI_ISL_667106	B.1.1.222	2020-08-03
Guatemala|19534|EPI_ISL_837595|B.1.1.368|2020-08-03	Guatemala	19534	EPI_ISL_837595	B.1.1.368	2020-08-03
Armenia|UW-ARM19|EPI_ISL_1854612|B.1.375|2020-08-03	Armenia	UW-ARM19	EPI_ISL_1854612	B.1.375	2020-08-03
Mexico|CMX-INER-IBT-0616|EPI_ISL_4496570|B.1.1.222|2020-08-04	Mexico	CMX-INER-IBT-0616	EPI_ISL_4496570	B.1.1.222	2020-08-04
Mexico|CMX-INER-IBT-0620|EPI_ISL_4496574|B.1.1.222|2020-08-04	Mexico	CMX-INER-IBT-0620	EPI_ISL_4496574	B.1.1.222	2020-08-04
USA|CA-CZB-10872|EPI_ISL_583112|B.1.1.222|2020-08-04	USA	CA-CZB-10872	EPI_ISL_583112	B.1.1.222	2020-08-04
Mexico|CMX-INER-IBT-0619|EPI_ISL_4496573|B.1.1.222|2020-08-04	Mexico	CMX-INER-IBT-0619	EPI_ISL_4496573	B.1.1.222	2020-08-04
England|BRIS-133838|EPI_ISL_524492|B.1.1.349|2020-08-04	England	BRIS-133838	EPI_ISL_524492	B.1.1.349	2020-08-04
USA|OR-OHSU-2129|EPI_ISL_667122|B.1.1.222|2020-08-05	USA	OR-OHSU-2129	EPI_ISL_667122	B.1.1.222	2020-08-05
USA|CA-CDPH090|EPI_ISL_754963|B.1.1.453|2020-08-05	USA	CA-CDPH090	EPI_ISL_754963	B.1.1.453	2020-08-05
USA|CO-QDX-3318|EPI_ISL_884316|B.1.570|2020-08-05	USA	CO-QDX-3318	EPI_ISL_884316	B.1.570	2020-08-05
CzechRepublic|IAB20-016-031|EPI_ISL_889356|B.1.1.153|2020-08-06	CzechRepublic	IAB20-016-031	EPI_ISL_889356	B.1.1.153	2020-08-06
Mexico|CMX-INMEGEN-19|EPI_ISL_522984|B.1.1.222|2020-08-06	Mexico	CMX-INMEGEN-19	EPI_ISL_522984	B.1.1.222	2020-08-06
Mexico|CMX-INMEGEN-21|EPI_ISL_522986|B.1.1.222|2020-08-06	Mexico	CMX-INMEGEN-21	EPI_ISL_522986	B.1.1.222	2020-08-06
Mexico|CMX-INER-IBT-0623|EPI_ISL_4496577|B.1.1.222|2020-08-06	Mexico	CMX-INER-IBT-0623	EPI_ISL_4496577	B.1.1.222	2020-08-06
Mexico|CMX-INER-0198|EPI_ISL_837793|B.1.1.222|2020-08-06	Mexico	CMX-INER-0198	EPI_ISL_837793	B.1.1.222	2020-08-06
Mexico|CMX-INER-IBT-0622|EPI_ISL_4496576|B.1.1.222|2020-08-06	Mexico	CMX-INER-IBT-0622	EPI_ISL_4496576	B.1.1.222	2020-08-06
USA|TX-HMH-MCoV-39869|EPI_ISL_2222557|B.1.1.222|2020-08-06	USA	TX-HMH-MCoV-39869	EPI_ISL_2222557	B.1.1.222	2020-08-06
USA|TX-HMH-MCoV-39881|EPI_ISL_2222591|B.1.1.222|2020-08-06	USA	TX-HMH-MCoV-39881	EPI_ISL_2222591	B.1.1.222	2020-08-06
USA|OR-OHSU-2183|EPI_ISL_667139|B.1.1.222|2020-08-06	USA	OR-OHSU-2183	EPI_ISL_667139	B.1.1.222	2020-08-06
Spain|MD-IBV-99009620|EPI_ISL_654362|B.1.1.222|2020-08-06	Spain	MD-IBV-99009620	EPI_ISL_654362	B.1.1.222	2020-08-06
Russia|PRI-RII-MH820S|EPI_ISL_1400558|B.1.1.373|2020-08-07	Russia	PRI-RII-MH820S	EPI_ISL_1400558	B.1.1.373	2020-08-07
England|QEUH-95DF1D|EPI_ISL_537141|B.1.160.30|2020-08-07	England	QEUH-95DF1D	EPI_ISL_537141	B.1.160.30	2020-08-07
Mexico|CMX-INER-0199|EPI_ISL_837794|B.1.1.222|2020-08-08	Mexico	CMX-INER-0199	EPI_ISL_837794	B.1.1.222	2020-08-08
USA|IL-IDPH-WIL-S-0001715|EPI_ISL_1494513|B.1.1.222|2020-08-09	USA	IL-IDPH-WIL-S-0001715	EPI_ISL_1494513	B.1.1.222	2020-08-09
Mexico|CMX-INER-0200|EPI_ISL_837795|B.1.1.222|2020-08-09	Mexico	CMX-INER-0200	EPI_ISL_837795	B.1.1.222	2020-08-09
Mexico|CMX-INER-IBT-0981|EPI_ISL_5196747|B.1.1.222|2020-08-10	Mexico	CMX-INER-IBT-0981	EPI_ISL_5196747	B.1.1.222	2020-08-10
Mexico|CMX-INER-0202|EPI_ISL_837797|B.1.1.222|2020-08-10	Mexico	CMX-INER-0202	EPI_ISL_837797	B.1.1.222	2020-08-10
Netherlands|NB-EMC-847|EPI_ISL_1311761|B.1.177.81|2020-08-10	Netherlands	NB-EMC-847	EPI_ISL_1311761	B.1.177.81	2020-08-10
Mexico|CMX-INER-0203|EPI_ISL_837798|B.1.1.222|2020-08-11	Mexico	CMX-INER-0203	EPI_ISL_837798	B.1.1.222	2020-08-11
Mexico|CMX-INER-IBT-0985|EPI_ISL_5196750|B.1.1.222|2020-08-11	Mexico	CMX-INER-IBT-0985	EPI_ISL_5196750	B.1.1.222	2020-08-11
USA|CA-CZB-10889|EPI_ISL_583122|B.1.1.222|2020-08-11	USA	CA-CZB-10889	EPI_ISL_583122	B.1.1.222	2020-08-11
USA|CA-CZB-10892|EPI_ISL_583124|B.1.1.222|2020-08-11	USA	CA-CZB-10892	EPI_ISL_583124	B.1.1.222	2020-08-11
USA|CA-CZB-10887|EPI_ISL_583121|B.1.1.222|2020-08-11	USA	CA-CZB-10887	EPI_ISL_583121	B.1.1.222	2020-08-11
USA|CA-CZB-10891|EPI_ISL_583123|B.1.1.222|2020-08-11	USA	CA-CZB-10891	EPI_ISL_583123	B.1.1.222	2020-08-11
USA|TX-HMH-MCoV-35054|EPI_ISL_2219535|B.1.1.222|2020-08-11	USA	TX-HMH-MCoV-35054	EPI_ISL_2219535	B.1.1.222	2020-08-11
USA|IL-LCH-0539|EPI_ISL_2009401|B.1.1.222|2020-08-12	USA	IL-LCH-0539	EPI_ISL_2009401	B.1.1.222	2020-08-12
Japan|PG-8212|EPI_ISL_687311|B.1.1.397|2020-08-12	Japan	PG-8212	EPI_ISL_687311	B.1.1.397	2020-08-12
Mexico|TLA-InDRE-56|EPI_ISL_576259|B.1.1.222|2020-08-13	Mexico	TLA-InDRE-56	EPI_ISL_576259	B.1.1.222	2020-08-13
USA|CA-CZB-10895|EPI_ISL_583125|B.1.1.222|2020-08-13	USA	CA-CZB-10895	EPI_ISL_583125	B.1.1.222	2020-08-13
USA|CA-CZB-10896|EPI_ISL_583126|B.1.1.222|2020-08-13	USA	CA-CZB-10896	EPI_ISL_583126	B.1.1.222	2020-08-13
Mexico|CMX-INER-0205|EPI_ISL_843192|B.1.1.222|2020-08-13	Mexico	CMX-INER-0205	EPI_ISL_843192	B.1.1.222	2020-08-13
USA|IL-IDPH-BOO-S-0001787|EPI_ISL_1494049|B.1.1.222|2020-08-13	USA	IL-IDPH-BOO-S-0001787	EPI_ISL_1494049	B.1.1.222	2020-08-13
Mexico|MEX-InDRE_282|EPI_ISL_1054949|B.1.1.222|2020-08-13	Mexico	MEX-InDRE_282	EPI_ISL_1054949	B.1.1.222	2020-08-13
Mexico|CMX-INER-IBT-0992|EPI_ISL_5196756|B.1.1.222|2020-08-15	Mexico	CMX-INER-IBT-0992	EPI_ISL_5196756	B.1.1.222	2020-08-15
Germany|NW-UBI-161|EPI_ISL_1181283|B.1.177.43|2020-08-16	Germany	NW-UBI-161	EPI_ISL_1181283	B.1.177.43	2020-08-16
USA|IL-LCH-0544|EPI_ISL_2009426|B.1.1.222|2020-08-17	USA	IL-LCH-0544	EPI_ISL_2009426	B.1.1.222	2020-08-17
Denmark|DCGC-5282|EPI_ISL_615213|B.1.1.272|2020-08-17	Denmark	DCGC-5282	EPI_ISL_615213	B.1.1.272	2020-08-17
Ireland|D-NVRL-72IRL36222|EPI_ISL_578257|B.1.177.54|2020-08-17	Ireland	D-NVRL-72IRL36222	EPI_ISL_578257	B.1.177.54	2020-08-17
Scotland|QEUH-96A96A|EPI_ISL_534665|B.1.177.79|2020-08-17	Scotland	QEUH-96A96A	EPI_ISL_534665	B.1.177.79	2020-08-17
Iran|Tehran-055M|EPI_ISL_1014687|B.1.36.7|2020-08-17	Iran	Tehran-055M	EPI_ISL_1014687	B.1.36.7	2020-08-17
Mexico|CMX-INER-IBT-0999|EPI_ISL_5196761|B.1.1.222|2020-08-18	Mexico	CMX-INER-IBT-0999	EPI_ISL_5196761	B.1.1.222	2020-08-18
USA|OR-OHSU-2523|EPI_ISL_667237|B.1.1.222|2020-08-18	USA	OR-OHSU-2523	EPI_ISL_667237	B.1.1.222	2020-08-18
USA|NM-UNM-TC222979|EPI_ISL_6266694|B.1.1.222|2020-08-18	USA	NM-UNM-TC222979	EPI_ISL_6266694	B.1.1.222	2020-08-18
Switzerland|VD-ETHZ-250066|EPI_ISL_535592|B.1.177.44|2020-08-18	Switzerland	VD-ETHZ-250066	EPI_ISL_535592	B.1.177.44	2020-08-18
England|MILK-9714F6|EPI_ISL_553019|B.1.177.52|2020-08-18	England	MILK-9714F6	EPI_ISL_553019	B.1.177.52	2020-08-18
USA|IL-LCH-0545|EPI_ISL_2009435|B.1.1.222|2020-08-19	USA	IL-LCH-0545	EPI_ISL_2009435	B.1.1.222	2020-08-19
Mexico|CMX-InDRE_286|EPI_ISL_1054940|B.1.1.222|2020-08-19	Mexico	CMX-InDRE_286	EPI_ISL_1054940	B.1.1.222	2020-08-19
USA|TX-HMH-MCoV-13714|EPI_ISL_788808|B.1.1.222|2020-08-20	USA	TX-HMH-MCoV-13714	EPI_ISL_788808	B.1.1.222	2020-08-20
USA|TX-HMH-MCoV-13713|EPI_ISL_788807|B.1.1.222|2020-08-20	USA	TX-HMH-MCoV-13713	EPI_ISL_788807	B.1.1.222	2020-08-20
USA|CO-CDPHE-2008230413|EPI_ISL_5259579|B.1.1.222|2020-08-20	USA	CO-CDPHE-2008230413	EPI_ISL_5259579	B.1.1.222	2020-08-20
USA|OR-OHSU-2569|EPI_ISL_667254|B.1.1.222|2020-08-20	USA	OR-OHSU-2569	EPI_ISL_667254	B.1.1.222	2020-08-20
USA|OR-OHSU-2575|EPI_ISL_667255|B.1.1.222|2020-08-20	USA	OR-OHSU-2575	EPI_ISL_667255	B.1.1.222	2020-08-20
Mexico|CMX-INER-IBT-1003|EPI_ISL_5196765|B.1.1.222|2020-08-20	Mexico	CMX-INER-IBT-1003	EPI_ISL_5196765	B.1.1.222	2020-08-20
Mexico|CMX-INER-0209|EPI_ISL_837803|B.1.1.222|2020-08-20	Mexico	CMX-INER-0209	EPI_ISL_837803	B.1.1.222	2020-08-20
Scotland|QEUH-96D396|EPI_ISL_534634|B.1.36.20|2020-08-20	Scotland	QEUH-96D396	EPI_ISL_534634	B.1.36.20	2020-08-20
Mexico|CMX-INMEGEN-04-07-316|EPI_ISL_4220081|B.1.1.222|2020-08-21	Mexico	CMX-INMEGEN-04-07-316	EPI_ISL_4220081	B.1.1.222	2020-08-21
Mexico|CMX-INMEGEN-04-07-332|EPI_ISL_4220091|B.1.1.222|2020-08-21	Mexico	CMX-INMEGEN-04-07-332	EPI_ISL_4220091	B.1.1.222	2020-08-21
Mexico|CMX-INMEGEN-04-07-306|EPI_ISL_4220072|B.1.1.222|2020-08-21	Mexico	CMX-INMEGEN-04-07-306	EPI_ISL_4220072	B.1.1.222	2020-08-21
Mexico|CMX-INMEGEN-04-07-325|EPI_ISL_4220087|B.1.1.222|2020-08-21	Mexico	CMX-INMEGEN-04-07-325	EPI_ISL_4220087	B.1.1.222	2020-08-21
Mexico|CMX-INMEGEN-04-07-335|EPI_ISL_4220094|B.1.1.222|2020-08-21	Mexico	CMX-INMEGEN-04-07-335	EPI_ISL_4220094	B.1.1.222	2020-08-21
Mexico|CMX-INMEGEN-04-07-302|EPI_ISL_4220070|B.1.1.222|2020-08-21	Mexico	CMX-INMEGEN-04-07-302	EPI_ISL_4220070	B.1.1.222	2020-08-21
Mexico|CMX-INMEGEN-04-07-303|EPI_ISL_4220071|B.1.1.222|2020-08-21	Mexico	CMX-INMEGEN-04-07-303	EPI_ISL_4220071	B.1.1.222	2020-08-21
Ghana|WACCBIP-GS178|EPI_ISL_1255112|B.1.1.403|2020-08-21	Ghana	WACCBIP-GS178	EPI_ISL_1255112	B.1.1.403	2020-08-21
USA|OR-OHSU-2639|EPI_ISL_667270|B.1.1.222|2020-08-22	USA	OR-OHSU-2639	EPI_ISL_667270	B.1.1.222	2020-08-22
USA|CA-ALSR-3131|EPI_ISL_635863|B.1.1.222|2020-08-22	USA	CA-ALSR-3131	EPI_ISL_635863	B.1.1.222	2020-08-22
Mexico|CMX-INMEGEN-04-07-336|EPI_ISL_4220095|B.1.1.222|2020-08-22	Mexico	CMX-INMEGEN-04-07-336	EPI_ISL_4220095	B.1.1.222	2020-08-22
Mexico|CMX-INMEGEN-04-07-345|EPI_ISL_4220101|B.1.1.222|2020-08-22	Mexico	CMX-INMEGEN-04-07-345	EPI_ISL_4220101	B.1.1.222	2020-08-22
Mexico|CMX-INMEGEN-04-07-338|EPI_ISL_4220097|B.1.1.222|2020-08-22	Mexico	CMX-INMEGEN-04-07-338	EPI_ISL_4220097	B.1.1.222	2020-08-22
Denmark|DCGC-2956|EPI_ISL_616717|AQ.2|2020-08-24	Denmark	DCGC-2956	EPI_ISL_616717	AQ.2	2020-08-24
Mexico|CMX-INMEGEN-04-07-360|EPI_ISL_4220112|B.1.1.222|2020-08-24	Mexico	CMX-INMEGEN-04-07-360	EPI_ISL_4220112	B.1.1.222	2020-08-24
USA|IL-IDPH-BOO-S-0001931|EPI_ISL_1323383|B.1.1.222|2020-08-24	USA	IL-IDPH-BOO-S-0001931	EPI_ISL_1323383	B.1.1.222	2020-08-24
USA|NM-DOH-2020307954|EPI_ISL_602167|B.1.1.222|2020-08-24	USA	NM-DOH-2020307954	EPI_ISL_602167	B.1.1.222	2020-08-24
Mexico|CMX-INMEGEN-04-07-358|EPI_ISL_4220111|B.1.1.222|2020-08-24	Mexico	CMX-INMEGEN-04-07-358	EPI_ISL_4220111	B.1.1.222	2020-08-24
USA|TX-HMH-MCoV-13336|EPI_ISL_788484|B.1.1.222|2020-08-24	USA	TX-HMH-MCoV-13336	EPI_ISL_788484	B.1.1.222	2020-08-24
Mexico|CMX-INMEGEN-04-07-361|EPI_ISL_4220113|B.1.1.222|2020-08-24	Mexico	CMX-INMEGEN-04-07-361	EPI_ISL_4220113	B.1.1.222	2020-08-24
Mexico|CMX-INMEGEN-04-07-362|EPI_ISL_4220114|B.1.1.222|2020-08-24	Mexico	CMX-INMEGEN-04-07-362	EPI_ISL_4220114	B.1.1.222	2020-08-24
England|MILK-995201|EPI_ISL_552340|B.1.177.3|2020-08-24	England	MILK-995201	EPI_ISL_552340	B.1.177.3	2020-08-24
Mexico|HID-InDRE-65|EPI_ISL_576268|B.1.1.222|2020-08-25	Mexico	HID-InDRE-65	EPI_ISL_576268	B.1.1.222	2020-08-25
England|MILK-993397|EPI_ISL_551986|B.1.1.196|2020-08-26	England	MILK-993397	EPI_ISL_551986	B.1.1.196	2020-08-26
Mexico|CMX-INMEGEN-03-11-100|EPI_ISL_4219738|B.1.1.222|2020-08-26	Mexico	CMX-INMEGEN-03-11-100	EPI_ISL_4219738	B.1.1.222	2020-08-26
Mexico|CMX-INMEGEN-03-10-63|EPI_ISL_4219723|B.1.1.222|2020-08-26	Mexico	CMX-INMEGEN-03-10-63	EPI_ISL_4219723	B.1.1.222	2020-08-26
Mexico|BCN-ALSR-4935|EPI_ISL_730220|B.1.1.222|2020-08-26	Mexico	BCN-ALSR-4935	EPI_ISL_730220	B.1.1.222	2020-08-26
USA|IL-IDPH-WIN-S-0001916|EPI_ISL_1323376|B.1.1.222|2020-08-26	USA	IL-IDPH-WIN-S-0001916	EPI_ISL_1323376	B.1.1.222	2020-08-26
Mexico|CMX-INMEGEN-03-11-99|EPI_ISL_4219737|B.1.1.222|2020-08-26	Mexico	CMX-INMEGEN-03-11-99	EPI_ISL_4219737	B.1.1.222	2020-08-26
Russia|AST-RII-MH4485S|EPI_ISL_733209|B.1.264.1|2020-08-26	Russia	AST-RII-MH4485S	EPI_ISL_733209	B.1.264.1	2020-08-26
Mexico|CMX-INMEGEN-03-11-102|EPI_ISL_4219740|B.1.1.222|2020-08-27	Mexico	CMX-INMEGEN-03-11-102	EPI_ISL_4219740	B.1.1.222	2020-08-27
USA|NV-NSPHL-NV2024730|EPI_ISL_1378657|B.1.1.222|2020-08-27	USA	NV-NSPHL-NV2024730	EPI_ISL_1378657	B.1.1.222	2020-08-27
England|MILK-992152|EPI_ISL_540650|B.1.1.240|2020-08-27	England	MILK-992152	EPI_ISL_540650	B.1.1.240	2020-08-27
Mexico|CMX-INMEGEN-03-10-51|EPI_ISL_4219713|B.1.1.222|2020-08-28	Mexico	CMX-INMEGEN-03-10-51	EPI_ISL_4219713	B.1.1.222	2020-08-28
USA|OR-OHSU-2743|EPI_ISL_667299|B.1.1.222|2020-08-28	USA	OR-OHSU-2743	EPI_ISL_667299	B.1.1.222	2020-08-28
USA|NM-DOH-2020319224|EPI_ISL_732746|B.1.1.222|2020-08-28	USA	NM-DOH-2020319224	EPI_ISL_732746	B.1.1.222	2020-08-28
Slovenia|77414|EPI_ISL_1499000|B.1.258.17|2020-08-28	Slovenia	77414	EPI_ISL_1499000	B.1.258.17	2020-08-28
USA|OR-OHSU-2773|EPI_ISL_667308|B.1.1.222|2020-08-29	USA	OR-OHSU-2773	EPI_ISL_667308	B.1.1.222	2020-08-29
USA|OR-OHSU-2771|EPI_ISL_667307|B.1.1.222|2020-08-29	USA	OR-OHSU-2771	EPI_ISL_667307	B.1.1.222	2020-08-29
England|MILK-99D096|EPI_ISL_549868|B.1.258.7|2020-08-29	England	MILK-99D096	EPI_ISL_549868	B.1.258.7	2020-08-29
USA|OR-OHSU-2797|EPI_ISL_667315|B.1.1.222|2020-08-31	USA	OR-OHSU-2797	EPI_ISL_667315	B.1.1.222	2020-08-31
Denmark|DCGC-3650|EPI_ISL_615422|B.1.1.224|2020-08-31	Denmark	DCGC-3650	EPI_ISL_615422	B.1.1.224	2020-08-31
Denmark|DCGC-3333|EPI_ISL_616087|B.1.258.9|2020-08-31	Denmark	DCGC-3333	EPI_ISL_616087	B.1.258.9	2020-08-31
Mexico|CMX-IMSS-S075-7|EPI_ISL_6901971|B.1.1.222|2020-09-01	Mexico	CMX-IMSS-S075-7	EPI_ISL_6901971	B.1.1.222	2020-09-01
USA|NMDOH-2020324000|EPI_ISL_542091|B.1.1.222|2020-09-01	USA	NMDOH-2020324000	EPI_ISL_542091	B.1.1.222	2020-09-01
USA|NMDOH-2020321601|EPI_ISL_542068|B.1.1.320|2020-09-01	USA	NMDOH-2020321601	EPI_ISL_542068	B.1.1.320	2020-09-01
Spain|PV-IBV-98007585|EPI_ISL_582036|B.1.177.60|2020-09-01	Spain	PV-IBV-98007585	EPI_ISL_582036	B.1.177.60	2020-09-01
Lebanon|LAU-R87|EPI_ISL_1009016|B.1.36.35|2020-09-01	Lebanon	LAU-R87	EPI_ISL_1009016	B.1.36.35	2020-09-01
Israel|CVL-s2049|EPI_ISL_575332|B.1.362.2|2020-09-01	Israel	CVL-s2049	EPI_ISL_575332	B.1.362.2	2020-09-01
Spain|MD-IBV-99020703|EPI_ISL_1120922|B.1.1.222|2020-09-02	Spain	MD-IBV-99020703	EPI_ISL_1120922	B.1.1.222	2020-09-02
USA|NM-NMDOH-2020326664|EPI_ISL_632843|B.1.1.222|2020-09-02	USA	NM-NMDOH-2020326664	EPI_ISL_632843	B.1.1.222	2020-09-02
England|QEUH-9B7746|EPI_ISL_590540|B.1.177.10|2020-09-02	England	QEUH-9B7746	EPI_ISL_590540	B.1.177.10	2020-09-02
Italy|CAM-TIGEM-1017|EPI_ISL_837273|B.1.177.33|2020-09-02	Italy	CAM-TIGEM-1017	EPI_ISL_837273	B.1.177.33	2020-09-02
Mexico|CMX-INER-IBT-0280|EPI_ISL_2839238|B.1.1.222|2020-09-03	Mexico	CMX-INER-IBT-0280	EPI_ISL_2839238	B.1.1.222	2020-09-03
Mexico|CMX-INER-IBT-0281|EPI_ISL_2839240|B.1.1.222|2020-09-03	Mexico	CMX-INER-IBT-0281	EPI_ISL_2839240	B.1.1.222	2020-09-03
USA|OR-OHSU-2873|EPI_ISL_667376|B.1.1.222|2020-09-03	USA	OR-OHSU-2873	EPI_ISL_667376	B.1.1.222	2020-09-03
USA|WI-UW-1527|EPI_ISL_605405|B.1.1.222|2020-09-03	USA	WI-UW-1527	EPI_ISL_605405	B.1.1.222	2020-09-03
USA|CA-CDPH-UC1508|EPI_ISL_984523|B.1.1.222|2020-09-03	USA	CA-CDPH-UC1508	EPI_ISL_984523	B.1.1.222	2020-09-03
USA|NV-NSPHL-NV2025754|EPI_ISL_1263141|B.1.1.222|2020-09-03	USA	NV-NSPHL-NV2025754	EPI_ISL_1263141	B.1.1.222	2020-09-03
USA|CO-CDPHE-2009051546|EPI_ISL_5847408|B.1.1.222|2020-09-03	USA	CO-CDPHE-2009051546	EPI_ISL_5847408	B.1.1.222	2020-09-03
USA|NM-NMDOH-2020328523|EPI_ISL_569656|B.1.1.222|2020-09-03	USA	NM-NMDOH-2020328523	EPI_ISL_569656	B.1.1.222	2020-09-03
England|QEUH-9B4E35|EPI_ISL_590415|B.1.177.19|2020-09-03	England	QEUH-9B4E35	EPI_ISL_590415	B.1.177.19	2020-09-03
Wales|PHWC-16A23A|EPI_ISL_535219|AP.1|2020-09-04	Wales	PHWC-16A23A	EPI_ISL_535219	AP.1	2020-09-04
USA|IA-GMF-18913|EPI_ISL_547788|B.1.1.222|2020-09-04	USA	IA-GMF-18913	EPI_ISL_547788	B.1.1.222	2020-09-04
USA|CA-CDPH-UC1490|EPI_ISL_984506|B.1.1.222|2020-09-04	USA	CA-CDPH-UC1490	EPI_ISL_984506	B.1.1.222	2020-09-04
Russia|SPE-RII-MH1007S|EPI_ISL_596250|B.1.1.449|2020-09-04	Russia	SPE-RII-MH1007S	EPI_ISL_596250	B.1.1.449	2020-09-04
Mexico|CMX-INER-IBT-0290|EPI_ISL_2839257|B.1.1.222|2020-09-05	Mexico	CMX-INER-IBT-0290	EPI_ISL_2839257	B.1.1.222	2020-09-05
South_Korea|KDCA3553|EPI_ISL_2161063|B.1.1.222|2020-09-05	South_Korea	KDCA3553	EPI_ISL_2161063	B.1.1.222	2020-09-05
Ireland|D-NVRL-73IRL25053|EPI_ISL_578262|B.1.177.59|2020-09-05	Ireland	D-NVRL-73IRL25053	EPI_ISL_578262	B.1.177.59	2020-09-05
Spain|CT-IBV-99012709|EPI_ISL_949196|B.1.177.29|2020-09-07	Spain	CT-IBV-99012709	EPI_ISL_949196	B.1.177.29	2020-09-07
USA|NY-MSHSPSP-PV17752|EPI_ISL_801866|B.1.526.1|2020-09-07	USA	NY-MSHSPSP-PV17752	EPI_ISL_801866	B.1.526.1	2020-09-07
USA|TX-HMH-MCoV-11739|EPI_ISL_790099|B.1.1.222|2020-09-08	USA	TX-HMH-MCoV-11739	EPI_ISL_790099	B.1.1.222	2020-09-08
USA|WI-GMF-19309|EPI_ISL_547807|B.1.1.222|2020-09-08	USA	WI-GMF-19309	EPI_ISL_547807	B.1.1.222	2020-09-08
Mexico|BCN-ALSR-8429|EPI_ISL_1531893|B.1.1.222|2020-09-08	Mexico	BCN-ALSR-8429	EPI_ISL_1531893	B.1.1.222	2020-09-08
Mexico|CMX-INER-IBT-0285|EPI_ISL_2839247|B.1.1.222|2020-09-08	Mexico	CMX-INER-IBT-0285	EPI_ISL_2839247	B.1.1.222	2020-09-08
USA|NY-NYCPHL-001042|EPI_ISL_633054|B.1.478|2020-09-08	USA	NY-NYCPHL-001042	EPI_ISL_633054	B.1.478	2020-09-08
USA|CO-CDPHE-2009121026|EPI_ISL_5847428|B.1.1.222|2020-09-09	USA	CO-CDPHE-2009121026	EPI_ISL_5847428	B.1.1.222	2020-09-09
Mexico|CMX-INER-IBT-0299|EPI_ISL_2839274|B.1.1.222|2020-09-09	Mexico	CMX-INER-IBT-0299	EPI_ISL_2839274	B.1.1.222	2020-09-09
USA|TX-HMH-MCoV-11812|EPI_ISL_790114|B.1.1.222|2020-09-09	USA	TX-HMH-MCoV-11812	EPI_ISL_790114	B.1.1.222	2020-09-09
USA|OR-OHSU-2982|EPI_ISL_667446|B.1.1.222|2020-09-09	USA	OR-OHSU-2982	EPI_ISL_667446	B.1.1.222	2020-09-09
USA|AZ-OHSU-2984|EPI_ISL_667448|B.1.1.222|2020-09-09	USA	AZ-OHSU-2984	EPI_ISL_667448	B.1.1.222	2020-09-09
USA|CO-CDPHE-2009094207|EPI_ISL_5847425|B.1.1.222|2020-09-09	USA	CO-CDPHE-2009094207	EPI_ISL_5847425	B.1.1.222	2020-09-09
Mexico|CMX-INER-IBT-0300|EPI_ISL_2839276|B.1.1.222|2020-09-09	Mexico	CMX-INER-IBT-0300	EPI_ISL_2839276	B.1.1.222	2020-09-09
Mexico|CMX-INER-IBT-0296|EPI_ISL_2839268|B.1.1.222|2020-09-09	Mexico	CMX-INER-IBT-0296	EPI_ISL_2839268	B.1.1.222	2020-09-09
England|ALDP-9BCEA6|EPI_ISL_572850|B.1.258.5|2020-09-09	England	ALDP-9BCEA6	EPI_ISL_572850	B.1.258.5	2020-09-09
Mexico|CMX-INER-IBT-0305|EPI_ISL_2839286|B.1.1.222|2020-09-10	Mexico	CMX-INER-IBT-0305	EPI_ISL_2839286	B.1.1.222	2020-09-10
Mexico|CMX-INER-IBT-0306|EPI_ISL_2839287|B.1.1.222|2020-09-10	Mexico	CMX-INER-IBT-0306	EPI_ISL_2839287	B.1.1.222	2020-09-10
USA|CA-CDPH-UC1514|EPI_ISL_984529|B.1.1.222|2020-09-10	USA	CA-CDPH-UC1514	EPI_ISL_984529	B.1.1.222	2020-09-10
USA|CA-CZB-12814|EPI_ISL_648465|B.1.1.222|2020-09-10	USA	CA-CZB-12814	EPI_ISL_648465	B.1.1.222	2020-09-10
Mexico|CMX-INER-IBT-0297|EPI_ISL_2839270|B.1.1.222|2020-09-10	Mexico	CMX-INER-IBT-0297	EPI_ISL_2839270	B.1.1.222	2020-09-10
Wales|ALDP-9C5138|EPI_ISL_567792|B.1.177.9|2020-09-10	Wales	ALDP-9C5138	EPI_ISL_567792	B.1.177.9	2020-09-10
England|QEUH-9C9F2B|EPI_ISL_567431|B.1.258.6|2020-09-10	England	QEUH-9C9F2B	EPI_ISL_567431	B.1.258.6	2020-09-10
USA|MA-MGH-03155|EPI_ISL_765722|B.1.433|2020-09-10	USA	MA-MGH-03155	EPI_ISL_765722	B.1.433	2020-09-10
Bahrain|920396988-S5-L001|EPI_ISL_681301|AE.7|2020-09-11	Bahrain	920396988-S5-L001	EPI_ISL_681301	AE.7	2020-09-11
USA|TX-HMH-MCoV-11592|EPI_ISL_1202055|B.1.1.222|2020-09-11	USA	TX-HMH-MCoV-11592	EPI_ISL_1202055	B.1.1.222	2020-09-11
Mexico|CMX-INER-IBT-0313|EPI_ISL_2839301|B.1.1.222|2020-09-11	Mexico	CMX-INER-IBT-0313	EPI_ISL_2839301	B.1.1.222	2020-09-11
Mexico|CMX-INER-IBT-0311|EPI_ISL_2839297|B.1.1.222|2020-09-11	Mexico	CMX-INER-IBT-0311	EPI_ISL_2839297	B.1.1.222	2020-09-11
Spain|MD-IBV-99013265|EPI_ISL_831148|B.1.177.49|2020-09-11	Spain	MD-IBV-99013265	EPI_ISL_831148	B.1.177.49	2020-09-11
USA|MI-UM-10035908382|EPI_ISL_583361|B.1.593|2020-09-11	USA	MI-UM-10035908382	EPI_ISL_583361	B.1.593	2020-09-11
Netherlands|NB-EMC-816|EPI_ISL_1311730|AG.1|2020-09-12	Netherlands	NB-EMC-816	EPI_ISL_1311730	AG.1	2020-09-12
USA|CA-CDPH-UC1524|EPI_ISL_984539|B.1.1.222|2020-09-12	USA	CA-CDPH-UC1524	EPI_ISL_984539	B.1.1.222	2020-09-12
USA|CA-9210074371|EPI_ISL_2009448|B.1.1.222|2020-09-13	USA	CA-9210074371	EPI_ISL_2009448	B.1.1.222	2020-09-13
USA|WI-GMF-20228|EPI_ISL_547858|B.1.1.222|2020-09-14	USA	WI-GMF-20228	EPI_ISL_547858	B.1.1.222	2020-09-14
USA|CA-CZB-13748|EPI_ISL_739507|B.1.1.222|2020-09-14	USA	CA-CZB-13748	EPI_ISL_739507	B.1.1.222	2020-09-14
USA|CA-CDPH-UC1542|EPI_ISL_984555|B.1.1.222|2020-09-14	USA	CA-CDPH-UC1542	EPI_ISL_984555	B.1.1.222	2020-09-14
Mexico|CMX-INER-IBT-0445|EPI_ISL_3758009|B.1.1.222|2020-09-14	Mexico	CMX-INER-IBT-0445	EPI_ISL_3758009	B.1.1.222	2020-09-14
Spain|MD-IBV-99013273|EPI_ISL_831156|B.1.1.222|2020-09-14	Spain	MD-IBV-99013273	EPI_ISL_831156	B.1.1.222	2020-09-14
England|QEUH-9D0F03|EPI_ISL_589828|B.1.1.341|2020-09-14	England	QEUH-9D0F03	EPI_ISL_589828	B.1.1.341	2020-09-14
USA|MI-MDHHS-SC22041|EPI_ISL_577591|B.1.1.222|2020-09-15	USA	MI-MDHHS-SC22041	EPI_ISL_577591	B.1.1.222	2020-09-15
USA|MI-MDHHS-SC22042|EPI_ISL_577592|B.1.1.222|2020-09-15	USA	MI-MDHHS-SC22042	EPI_ISL_577592	B.1.1.222	2020-09-15
USA|WI-UW-1562|EPI_ISL_605440|B.1.1.222|2020-09-16	USA	WI-UW-1562	EPI_ISL_605440	B.1.1.222	2020-09-16
USA|WI-UW-1564|EPI_ISL_605442|B.1.1.222|2020-09-16	USA	WI-UW-1564	EPI_ISL_605442	B.1.1.222	2020-09-16
USA|WI-UW-1886|EPI_ISL_605755|B.1.1.222|2020-09-16	USA	WI-UW-1886	EPI_ISL_605755	B.1.1.222	2020-09-16
USA|WI-UW-1563|EPI_ISL_605441|B.1.1.222|2020-09-16	USA	WI-UW-1563	EPI_ISL_605441	B.1.1.222	2020-09-16
USA|FL-BPHL-2853|EPI_ISL_935374|B.1.1.222|2020-09-16	USA	FL-BPHL-2853	EPI_ISL_935374	B.1.1.222	2020-09-16
USA|TX-HMH-MCoV-11863|EPI_ISL_789989|B.1.1.222|2020-09-16	USA	TX-HMH-MCoV-11863	EPI_ISL_789989	B.1.1.222	2020-09-16
USA|VA-DCLS-1809|EPI_ISL_614060|B.1.1.392|2020-09-16	USA	VA-DCLS-1809	EPI_ISL_614060	B.1.1.392	2020-09-16
England|ALDP-9CDC5D|EPI_ISL_566346|B.1.177.84|2020-09-16	England	ALDP-9CDC5D	EPI_ISL_566346	B.1.177.84	2020-09-16
Mexico|CMX-INER-IBT-0449|EPI_ISL_3758013|B.1.1.222|2020-09-17	Mexico	CMX-INER-IBT-0449	EPI_ISL_3758013	B.1.1.222	2020-09-17
USA|IL-LCH-0557|EPI_ISL_2009507|B.1.1.222|2020-09-17	USA	IL-LCH-0557	EPI_ISL_2009507	B.1.1.222	2020-09-17
Mexico|CMX-INER-IBT-0447|EPI_ISL_3758011|B.1.1.222|2020-09-17	Mexico	CMX-INER-IBT-0447	EPI_ISL_3758011	B.1.1.222	2020-09-17
Scotland|QEUH-9CE9BF|EPI_ISL_602019|B.1.258.10|2020-09-17	Scotland	QEUH-9CE9BF	EPI_ISL_602019	B.1.258.10	2020-09-17
USA|CO-CDPHE-2009183025|EPI_ISL_5930451|B.1.1.222|2020-09-18	USA	CO-CDPHE-2009183025	EPI_ISL_5930451	B.1.1.222	2020-09-18
Mexico|CMX-INER-IBT-0450|EPI_ISL_3758014|B.1.1.222|2020-09-18	Mexico	CMX-INER-IBT-0450	EPI_ISL_3758014	B.1.1.222	2020-09-18
Netherlands|ZH-EMC-597|EPI_ISL_578025|B.1.160.13|2020-09-18	Netherlands	ZH-EMC-597	EPI_ISL_578025	B.1.160.13	2020-09-18
HongKong|VM20123554|EPI_ISL_760032|B.1.36.27|2020-09-18	HongKong	VM20123554	EPI_ISL_760032	B.1.36.27	2020-09-18
USA|TX-HMH-MCoV-12168|EPI_ISL_789976|B.1.1.222|2020-09-19	USA	TX-HMH-MCoV-12168	EPI_ISL_789976	B.1.1.222	2020-09-19
England|CAMC-9D2095|EPI_ISL_601611|B.1.362.1|2020-09-19	England	CAMC-9D2095	EPI_ISL_601611	B.1.362.1	2020-09-19
USA|WI-UW-1597|EPI_ISL_605474|B.1.1.222|2020-09-21	USA	WI-UW-1597	EPI_ISL_605474	B.1.1.222	2020-09-21
Denmark|DCGC-4950|EPI_ISL_621488|B.1.1.333|2020-09-21	Denmark	DCGC-4950	EPI_ISL_621488	B.1.1.333	2020-09-21
Denmark|DCGC-5983|EPI_ISL_621092|B.1.1.346|2020-09-21	Denmark	DCGC-5983	EPI_ISL_621092	B.1.1.346	2020-09-21
England|QEUH-9E3495|EPI_ISL_584847|B.1.36.39|2020-09-21	England	QEUH-9E3495	EPI_ISL_584847	B.1.36.39	2020-09-21
Mexico|CMX-INMEGEN-03-10-79|EPI_ISL_4219731|B.1.1.222|2020-09-22	Mexico	CMX-INMEGEN-03-10-79	EPI_ISL_4219731	B.1.1.222	2020-09-22
USA|CA-CZB-14717|EPI_ISL_739011|B.1.1.222|2020-09-22	USA	CA-CZB-14717	EPI_ISL_739011	B.1.1.222	2020-09-22
USA|CA-CZB-14718|EPI_ISL_2658704|B.1.1.222|2020-09-22	USA	CA-CZB-14718	EPI_ISL_2658704	B.1.1.222	2020-09-22
Mexico|CMX-INER-IBT-0456|EPI_ISL_3758020|B.1.1.222|2020-09-22	Mexico	CMX-INER-IBT-0456	EPI_ISL_3758020	B.1.1.222	2020-09-22
USA|NY-Wadsworth-224392-01|EPI_ISL_677105|B.1.1.222|2020-09-22	USA	NY-Wadsworth-224392-01	EPI_ISL_677105	B.1.1.222	2020-09-22
USA|NY-Wadsworth-224393-01|EPI_ISL_677106|B.1.1.222|2020-09-22	USA	NY-Wadsworth-224393-01	EPI_ISL_677106	B.1.1.222	2020-09-22
Mexico|CMX-INER-IBT-0455|EPI_ISL_3758019|B.1.1.222|2020-09-22	Mexico	CMX-INER-IBT-0455	EPI_ISL_3758019	B.1.1.222	2020-09-22
USA|NY-Wadsworth-226388-01|EPI_ISL_767437|B.1.1.222|2020-09-23	USA	NY-Wadsworth-226388-01	EPI_ISL_767437	B.1.1.222	2020-09-23
USA|NY-Wadsworth-226389-01|EPI_ISL_767438|B.1.1.222|2020-09-23	USA	NY-Wadsworth-226389-01	EPI_ISL_767438	B.1.1.222	2020-09-23
USA|KS-QDX-3356|EPI_ISL_884349|B.1.1.222|2020-09-23	USA	KS-QDX-3356	EPI_ISL_884349	B.1.1.222	2020-09-23
USA|CO-CDPHE-2009280128|EPI_ISL_5930894|B.1.1.222|2020-09-24	USA	CO-CDPHE-2009280128	EPI_ISL_5930894	B.1.1.222	2020-09-24
USA|NY-NYCPHL-000943|EPI_ISL_632982|B.1.1.222|2020-09-24	USA	NY-NYCPHL-000943	EPI_ISL_632982	B.1.1.222	2020-09-24
USA|WI-UW-4835|EPI_ISL_2294911|B.1.1.222|2020-09-24	USA	WI-UW-4835	EPI_ISL_2294911	B.1.1.222	2020-09-24
Mexico|CMX-INER-IBT-0458|EPI_ISL_3758022|B.1.1.222|2020-09-24	Mexico	CMX-INER-IBT-0458	EPI_ISL_3758022	B.1.1.222	2020-09-24
USA|CO-CDPHE-2009280364|EPI_ISL_5930899|B.1.1.222|2020-09-25	USA	CO-CDPHE-2009280364	EPI_ISL_5930899	B.1.1.222	2020-09-25
Mexico|CMX-INER-IBT-0464|EPI_ISL_3758028|B.1.1.222|2020-09-25	Mexico	CMX-INER-IBT-0464	EPI_ISL_3758028	B.1.1.222	2020-09-25
USA|CO-CDPHE-2009282280|EPI_ISL_5930909|B.1.1.222|2020-09-25	USA	CO-CDPHE-2009282280	EPI_ISL_5930909	B.1.1.222	2020-09-25
Mexico|CMX-INER-IBT-0462|EPI_ISL_3758026|B.1.1.222|2020-09-25	Mexico	CMX-INER-IBT-0462	EPI_ISL_3758026	B.1.1.222	2020-09-25
Switzerland|VD-ETHZ-300298|EPI_ISL_603330|B.1.160.26|2020-09-25	Switzerland	VD-ETHZ-300298	EPI_ISL_603330	B.1.160.26	2020-09-25
England|MILK-9F0811|EPI_ISL_580665|B.1.177.58|2020-09-25	England	MILK-9F0811	EPI_ISL_580665	B.1.177.58	2020-09-25
USA|TX-HMH-MCoV-12382|EPI_ISL_790321|B.1.1.222|2020-09-26	USA	TX-HMH-MCoV-12382	EPI_ISL_790321	B.1.1.222	2020-09-26
USA|TX-HMH-MCoV-12313|EPI_ISL_790295|B.1.1.358|2020-09-26	USA	TX-HMH-MCoV-12313	EPI_ISL_790295	B.1.1.358	2020-09-26
England|NORW-F048F|EPI_ISL_577102|B.1.36.2|2020-09-27	England	NORW-F048F	EPI_ISL_577102	B.1.36.2	2020-09-27
USA|CO-CDPHE-2009293243|EPI_ISL_5930968|B.1.1.222|2020-09-28	USA	CO-CDPHE-2009293243	EPI_ISL_5930968	B.1.1.222	2020-09-28
Mexico|CMX-INER-IBT-0466|EPI_ISL_3758030|B.1.1.222|2020-09-28	Mexico	CMX-INER-IBT-0466	EPI_ISL_3758030	B.1.1.222	2020-09-28
Mexico|CMX-INER-IBT-0467|EPI_ISL_3758031|B.1.1.222|2020-09-28	Mexico	CMX-INER-IBT-0467	EPI_ISL_3758031	B.1.1.222	2020-09-28
Mexico|CMX-INER-IBT-0471|EPI_ISL_3758035|B.1.1.222|2020-09-28	Mexico	CMX-INER-IBT-0471	EPI_ISL_3758035	B.1.1.222	2020-09-28
Mexico|CMX-INMEGEN-03-10-08|EPI_ISL_4219689|B.1.1.222|2020-09-28	Mexico	CMX-INMEGEN-03-10-08	EPI_ISL_4219689	B.1.1.222	2020-09-28
USA|WI-UW-1947|EPI_ISL_677355|B.1.1.222|2020-09-29	USA	WI-UW-1947	EPI_ISL_677355	B.1.1.222	2020-09-29
Mexico|CMX-INER-IBT-0472|EPI_ISL_3758036|B.1.1.222|2020-09-29	Mexico	CMX-INER-IBT-0472	EPI_ISL_3758036	B.1.1.222	2020-09-29
USA|NY-MSHSPSP-PV21120|EPI_ISL_802307|B.1.1.222|2020-09-29	USA	NY-MSHSPSP-PV21120	EPI_ISL_802307	B.1.1.222	2020-09-29
Mexico|CMX-INER-IBT-0474|EPI_ISL_3758038|B.1.1.222|2020-09-29	Mexico	CMX-INER-IBT-0474	EPI_ISL_3758038	B.1.1.222	2020-09-29
USA|CO-CDPHE-2010023217|EPI_ISL_5931088|B.1.1.222|2020-09-30	USA	CO-CDPHE-2010023217	EPI_ISL_5931088	B.1.1.222	2020-09-30
USA|OR-OHSU-3072|EPI_ISL_667471|B.1.1.222|2020-09-30	USA	OR-OHSU-3072	EPI_ISL_667471	B.1.1.222	2020-09-30
USA|OR-OHSU-3067|EPI_ISL_667468|B.1.1.222|2020-09-30	USA	OR-OHSU-3067	EPI_ISL_667468	B.1.1.222	2020-09-30
USA|OR-OHSU-3051|EPI_ISL_667460|B.1.1.222|2020-09-30	USA	OR-OHSU-3051	EPI_ISL_667460	B.1.1.222	2020-09-30
USA|NC-ECU-CORVASEQ-104605385|EPI_ISL_5598657|B.1.1.222|2020-09-30	USA	NC-ECU-CORVASEQ-104605385	EPI_ISL_5598657	B.1.1.222	2020-09-30
USA|CO-CDPHE-2010030567|EPI_ISL_3943992|B.1.1.222|2020-09-30	USA	CO-CDPHE-2010030567	EPI_ISL_3943992	B.1.1.222	2020-09-30
Switzerland|UR-ETHZ-300265|EPI_ISL_603297|B.1.160.15|2020-09-30	Switzerland	UR-ETHZ-300265	EPI_ISL_603297	B.1.160.15	2020-09-30
USA|NY-Wadsworth-233903-01|EPI_ISL_754530|B.1.1.222|2020-10-01	USA	NY-Wadsworth-233903-01	EPI_ISL_754530	B.1.1.222	2020-10-01
USA|NY-Wadsworth-233901-01|EPI_ISL_734313|B.1.1.222|2020-10-01	USA	NY-Wadsworth-233901-01	EPI_ISL_734313	B.1.1.222	2020-10-01
USA|NY-CDC-2-3693492|EPI_ISL_747040|B.1.1.222|2020-10-01	USA	NY-CDC-2-3693492	EPI_ISL_747040	B.1.1.222	2020-10-01
USA|NY-Wadsworth-233888-01|EPI_ISL_734312|B.1.1.222|2020-10-01	USA	NY-Wadsworth-233888-01	EPI_ISL_734312	B.1.1.222	2020-10-01
USA|NY-Wadsworth-233898-01|EPI_ISL_1227960|B.1.1.222|2020-10-01	USA	NY-Wadsworth-233898-01	EPI_ISL_1227960	B.1.1.222	2020-10-01
USA|NY-Wadsworth-233889-01|EPI_ISL_754531|B.1.1.222|2020-10-01	USA	NY-Wadsworth-233889-01	EPI_ISL_754531	B.1.1.222	2020-10-01
USA|NY-Wadsworth-233890-01|EPI_ISL_754532|B.1.1.222|2020-10-01	USA	NY-Wadsworth-233890-01	EPI_ISL_754532	B.1.1.222	2020-10-01
Mexico|CMX-INER-IBT-0329|EPI_ISL_2839333|B.1.1.222|2020-10-01	Mexico	CMX-INER-IBT-0329	EPI_ISL_2839333	B.1.1.222	2020-10-01
USA|CA-SEARCH-8851|EPI_ISL_1794682|B.1.1.222|2020-10-01	USA	CA-SEARCH-8851	EPI_ISL_1794682	B.1.1.222	2020-10-01
Mexico|CMX-INER-IBT-0331|EPI_ISL_2839336|B.1.1.222|2020-10-01	Mexico	CMX-INER-IBT-0331	EPI_ISL_2839336	B.1.1.222	2020-10-01
Spain|AR-IBV-98010614|EPI_ISL_722256|B.1.177.76|2020-10-01	Spain	AR-IBV-98010614	EPI_ISL_722256	B.1.177.76	2020-10-01
Mexico|CMX-INER-IBT-0334|EPI_ISL_2839342|B.1.1.222|2020-10-02	Mexico	CMX-INER-IBT-0334	EPI_ISL_2839342	B.1.1.222	2020-10-02
Mexico|CMX-INER-IBT-0338|EPI_ISL_2839350|B.1.1.222|2020-10-02	Mexico	CMX-INER-IBT-0338	EPI_ISL_2839350	B.1.1.222	2020-10-02
USA|CO-CDPHE-2010051314|EPI_ISL_3943986|B.1.1.222|2020-10-02	USA	CO-CDPHE-2010051314	EPI_ISL_3943986	B.1.1.222	2020-10-02
Mexico|CMX-INER-IBT-0463|EPI_ISL_3758027|B.1.1.222|2020-10-02	Mexico	CMX-INER-IBT-0463	EPI_ISL_3758027	B.1.1.222	2020-10-02
USA|CA-CDPH-1002004534|EPI_ISL_5934423|B.1.1.222|2020-10-02	USA	CA-CDPH-1002004534	EPI_ISL_5934423	B.1.1.222	2020-10-02
USA|AL-Morgan-JDTB|EPI_ISL_872402|B.1.550|2020-10-03	USA	AL-Morgan-JDTB	EPI_ISL_872402	B.1.550	2020-10-03
England|ALDP-A2F2ED|EPI_ISL_587283|AS.2|2020-10-05	England	ALDP-A2F2ED	EPI_ISL_587283	AS.2	2020-10-05
USA|CA-ALSR-4237|EPI_ISL_648904|B.1.1.222|2020-10-05	USA	CA-ALSR-4237	EPI_ISL_648904	B.1.1.222	2020-10-05
USA|CA-ALSR-4253|EPI_ISL_648915|B.1.1.222|2020-10-05	USA	CA-ALSR-4253	EPI_ISL_648915	B.1.1.222	2020-10-05
USA|CA-LACPHL-AF01533|EPI_ISL_3276844|B.1.1.222|2020-10-05	USA	CA-LACPHL-AF01533	EPI_ISL_3276844	B.1.1.222	2020-10-05
USA|CA-LACPHL-AF01534|EPI_ISL_3276845|B.1.1.222|2020-10-05	USA	CA-LACPHL-AF01534	EPI_ISL_3276845	B.1.1.222	2020-10-05
USA|OR-OHSU-3183|EPI_ISL_667501|B.1.1.222|2020-10-05	USA	OR-OHSU-3183	EPI_ISL_667501	B.1.1.222	2020-10-05
Mexico|CMX-INER-IBT-0337|EPI_ISL_2839348|B.1.1.222|2020-10-05	Mexico	CMX-INER-IBT-0337	EPI_ISL_2839348	B.1.1.222	2020-10-05
USA|CO-CDPHE-2010072365|EPI_ISL_3943996|B.1.1.222|2020-10-05	USA	CO-CDPHE-2010072365	EPI_ISL_3943996	B.1.1.222	2020-10-05
USA|CO-CDPHE-2010072412|EPI_ISL_3943995|B.1.1.222|2020-10-05	USA	CO-CDPHE-2010072412	EPI_ISL_3943995	B.1.1.222	2020-10-05
USA|AL-Shelby-JDTM|EPI_ISL_872412|B.1.568|2020-10-05	USA	AL-Shelby-JDTM	EPI_ISL_872412	B.1.568	2020-10-05
Canada|Qc-HSE-5524134965|EPI_ISL_1403144|AS.1|2020-10-06	Canada	Qc-HSE-5524134965	EPI_ISL_1403144	AS.1	2020-10-06
Mexico|CMX-INER-IBT-0321|EPI_ISL_2839317|B.1.1.222|2020-10-06	Mexico	CMX-INER-IBT-0321	EPI_ISL_2839317	B.1.1.222	2020-10-06
Mexico|CMX-INER-IBT-0327|EPI_ISL_2839329|B.1.1.222|2020-10-06	Mexico	CMX-INER-IBT-0327	EPI_ISL_2839329	B.1.1.222	2020-10-06
Mexico|CMX-INER-IBT-0324|EPI_ISL_2839323|B.1.1.222|2020-10-06	Mexico	CMX-INER-IBT-0324	EPI_ISL_2839323	B.1.1.222	2020-10-06
USA|CO-CDPHE-2010091233|EPI_ISL_3944001|B.1.1.222|2020-10-06	USA	CO-CDPHE-2010091233	EPI_ISL_3944001	B.1.1.222	2020-10-06
USA|CA-ALSR-4252|EPI_ISL_648914|B.1.1.222|2020-10-06	USA	CA-ALSR-4252	EPI_ISL_648914	B.1.1.222	2020-10-06
USA|CA-UCSC-850|EPI_ISL_2179260|B.1.1.222|2020-10-06	USA	CA-UCSC-850	EPI_ISL_2179260	B.1.1.222	2020-10-06
USA|CO-CDPHE-2010071474|EPI_ISL_3943999|B.1.1.222|2020-10-06	USA	CO-CDPHE-2010071474	EPI_ISL_3943999	B.1.1.222	2020-10-06
Mexico|CMX-INER-IBT-0323|EPI_ISL_2839321|B.1.1.222|2020-10-06	Mexico	CMX-INER-IBT-0323	EPI_ISL_2839321	B.1.1.222	2020-10-06
USA|NY-MSHSPSP-PV19649|EPI_ISL_802358|B.1.1.222|2020-10-07	USA	NY-MSHSPSP-PV19649	EPI_ISL_802358	B.1.1.222	2020-10-07
Mexico|CMX-INMEGEN-03-10-12|EPI_ISL_4219690|B.1.1.222|2020-10-07	Mexico	CMX-INMEGEN-03-10-12	EPI_ISL_4219690	B.1.1.222	2020-10-07
Mexico|CMX-INER-IBT-0480|EPI_ISL_3758044|B.1.1.222|2020-10-07	Mexico	CMX-INER-IBT-0480	EPI_ISL_3758044	B.1.1.222	2020-10-07
USA|CA-CDPH-1002004549|EPI_ISL_5934438|B.1.1.222|2020-10-07	USA	CA-CDPH-1002004549	EPI_ISL_5934438	B.1.1.222	2020-10-07
Switzerland|TI-ETHZ-310454|EPI_ISL_603526|B.1.160.22|2020-10-07	Switzerland	TI-ETHZ-310454	EPI_ISL_603526	B.1.160.22	2020-10-07
Mexico|CMX-INER-IBT-0475|EPI_ISL_3758039|B.1.1.222|2020-10-08	Mexico	CMX-INER-IBT-0475	EPI_ISL_3758039	B.1.1.222	2020-10-08
USA|TX-HMH-MCoV-14538|EPI_ISL_787823|B.1.1.222|2020-10-08	USA	TX-HMH-MCoV-14538	EPI_ISL_787823	B.1.1.222	2020-10-08
USA|OR-OHSU-3307|EPI_ISL_832448|B.1.1.222|2020-10-08	USA	OR-OHSU-3307	EPI_ISL_832448	B.1.1.222	2020-10-08
USA|CA-CDPH-MC1134904|EPI_ISL_5695870|B.1.1.222|2020-10-08	USA	CA-CDPH-MC1134904	EPI_ISL_5695870	B.1.1.222	2020-10-08
USA|CO-CDPHE-2010102724|EPI_ISL_4890579|B.1.1.222|2020-10-08	USA	CO-CDPHE-2010102724	EPI_ISL_4890579	B.1.1.222	2020-10-08
USA|CO-CDPHE-2010103390|EPI_ISL_3943998|B.1.1.222|2020-10-08	USA	CO-CDPHE-2010103390	EPI_ISL_3943998	B.1.1.222	2020-10-08
USA|CO-CDPHE-2010102288|EPI_ISL_3943990|B.1.1.222|2020-10-08	USA	CO-CDPHE-2010102288	EPI_ISL_3943990	B.1.1.222	2020-10-08
USA|CO-CDPHE-2010103900|EPI_ISL_5931113|B.1.1.222|2020-10-08	USA	CO-CDPHE-2010103900	EPI_ISL_5931113	B.1.1.222	2020-10-08
USA|CO-CDPHE-2010103130|EPI_ISL_3943984|B.1.1.222|2020-10-08	USA	CO-CDPHE-2010103130	EPI_ISL_3943984	B.1.1.222	2020-10-08
USA|CO-CDPHE-2010102414|EPI_ISL_3943989|B.1.1.222|2020-10-08	USA	CO-CDPHE-2010102414	EPI_ISL_3943989	B.1.1.222	2020-10-08
USA|CO-CDPHE-2010102868|EPI_ISL_3943987|B.1.1.222|2020-10-08	USA	CO-CDPHE-2010102868	EPI_ISL_3943987	B.1.1.222	2020-10-08
USA|CO-CDPHE-2010111385|EPI_ISL_4890588|B.1.1.222|2020-10-08	USA	CO-CDPHE-2010111385	EPI_ISL_4890588	B.1.1.222	2020-10-08
USA|CO-CDPHE-2010111262|EPI_ISL_4890587|B.1.1.222|2020-10-08	USA	CO-CDPHE-2010111262	EPI_ISL_4890587	B.1.1.222	2020-10-08
USA|CO-CDPHE-2010103235|EPI_ISL_3944053|B.1.1.222|2020-10-08	USA	CO-CDPHE-2010103235	EPI_ISL_3944053	B.1.1.222	2020-10-08
USA|CO-CDPHE-2010123383|EPI_ISL_4890578|B.1.1.222|2020-10-08	USA	CO-CDPHE-2010123383	EPI_ISL_4890578	B.1.1.222	2020-10-08
USA|CO-CDPHE-2010102950|EPI_ISL_3943985|B.1.1.222|2020-10-08	USA	CO-CDPHE-2010102950	EPI_ISL_3943985	B.1.1.222	2020-10-08
USA|CO-CDPHE-2010103299|EPI_ISL_3943997|B.1.1.222|2020-10-08	USA	CO-CDPHE-2010103299	EPI_ISL_3943997	B.1.1.222	2020-10-08
USA|CO-CDPHE-2010102354|EPI_ISL_3944002|B.1.1.222|2020-10-08	USA	CO-CDPHE-2010102354	EPI_ISL_3944002	B.1.1.222	2020-10-08
USA|CO-CDPHE-2010104685|EPI_ISL_4890577|B.1.1.222|2020-10-08	USA	CO-CDPHE-2010104685	EPI_ISL_4890577	B.1.1.222	2020-10-08
USA|TX-HMH-MCoV-14550|EPI_ISL_787835|B.1.1.352|2020-10-08	USA	TX-HMH-MCoV-14550	EPI_ISL_787835	B.1.1.352	2020-10-08
USA|NY-NYCPHL-001044|EPI_ISL_633056|B.1.1.467|2020-10-08	USA	NY-NYCPHL-001044	EPI_ISL_633056	B.1.1.467	2020-10-08
Switzerland|SZ-ETHZ-310410|EPI_ISL_603484|B.1.160.31|2020-10-08	Switzerland	SZ-ETHZ-310410	EPI_ISL_603484	B.1.160.31	2020-10-08
Mexico|CMX-INER-IBT-0348|EPI_ISL_2839369|B.1.1.222|2020-10-09	Mexico	CMX-INER-IBT-0348	EPI_ISL_2839369	B.1.1.222	2020-10-09
USA|CA-CDPH-MC1145783|EPI_ISL_5696026|B.1.1.222|2020-10-09	USA	CA-CDPH-MC1145783	EPI_ISL_5696026	B.1.1.222	2020-10-09
USA|CA-CDPH-MC1139459|EPI_ISL_5695938|B.1.1.222|2020-10-09	USA	CA-CDPH-MC1139459	EPI_ISL_5695938	B.1.1.222	2020-10-09
Mexico|CMX-INER-IBT-0345|EPI_ISL_2839363|B.1.1.222|2020-10-09	Mexico	CMX-INER-IBT-0345	EPI_ISL_2839363	B.1.1.222	2020-10-09
USA|CO-CDPHE-2010123220|EPI_ISL_4890565|B.1.1.222|2020-10-09	USA	CO-CDPHE-2010123220	EPI_ISL_4890565	B.1.1.222	2020-10-09
USA|CO-CDPHE-2010123036|EPI_ISL_4890568|B.1.1.222|2020-10-09	USA	CO-CDPHE-2010123036	EPI_ISL_4890568	B.1.1.222	2020-10-09
USA|CO-CDPHE-2010123240|EPI_ISL_4890571|B.1.1.222|2020-10-09	USA	CO-CDPHE-2010123240	EPI_ISL_4890571	B.1.1.222	2020-10-09
USA|CO-CDPHE-2010123023|EPI_ISL_4890567|B.1.1.222|2020-10-09	USA	CO-CDPHE-2010123023	EPI_ISL_4890567	B.1.1.222	2020-10-09
USA|CO-CDPHE-2010122683|EPI_ISL_4890566|B.1.1.222|2020-10-09	USA	CO-CDPHE-2010122683	EPI_ISL_4890566	B.1.1.222	2020-10-09
USA|CO-CDPHE-2010123265|EPI_ISL_4890572|B.1.1.222|2020-10-09	USA	CO-CDPHE-2010123265	EPI_ISL_4890572	B.1.1.222	2020-10-09
USA|CO-CDPHE-2010123007|EPI_ISL_4890575|B.1.1.222|2020-10-09	USA	CO-CDPHE-2010123007	EPI_ISL_4890575	B.1.1.222	2020-10-09
USA|CO-CDPHE-2010120724|EPI_ISL_4890570|B.1.1.222|2020-10-09	USA	CO-CDPHE-2010120724	EPI_ISL_4890570	B.1.1.222	2020-10-09
Mexico|CMX-INER-IBT-0347|EPI_ISL_2839367|B.1.1.222|2020-10-09	Mexico	CMX-INER-IBT-0347	EPI_ISL_2839367	B.1.1.222	2020-10-09
Mexico|CMX-INER-IBT-0343|EPI_ISL_2839359|B.1.1.222|2020-10-10	Mexico	CMX-INER-IBT-0343	EPI_ISL_2839359	B.1.1.222	2020-10-10
USA|CA-UCSC-661|EPI_ISL_2082989|B.1.1.222|2020-10-10	USA	CA-UCSC-661	EPI_ISL_2082989	B.1.1.222	2020-10-10
USA|CO-CDPHE-2010104211|EPI_ISL_4890563|B.1.1.222|2020-10-10	USA	CO-CDPHE-2010104211	EPI_ISL_4890563	B.1.1.222	2020-10-10
Mexico|CMX-INMEGEN-03-11-121|EPI_ISL_4219759|B.1.1.222|2020-10-10	Mexico	CMX-INMEGEN-03-11-121	EPI_ISL_4219759	B.1.1.222	2020-10-10
Mexico|CMX-INER-IBT-0344|EPI_ISL_2839361|B.1.1.222|2020-10-10	Mexico	CMX-INER-IBT-0344	EPI_ISL_2839361	B.1.1.222	2020-10-10
USA|CA-CDPH-MC1150064|EPI_ISL_5761444|B.1.1.222|2020-10-10	USA	CA-CDPH-MC1150064	EPI_ISL_5761444	B.1.1.222	2020-10-10
Norway|4276|EPI_ISL_635143|B.1.1.451|2020-10-10	Norway	4276	EPI_ISL_635143	B.1.1.451	2020-10-10
Switzerland|VS-ETHZ-320194|EPI_ISL_737825|B.1.160.10|2020-10-10	Switzerland	VS-ETHZ-320194	EPI_ISL_737825	B.1.160.10	2020-10-10
USA|IL-NM-5526|EPI_ISL_936856|B.1.1.222|2020-10-11	USA	IL-NM-5526	EPI_ISL_936856	B.1.1.222	2020-10-11
USA|CA-CDPH-MC1151507|EPI_ISL_5761485|B.1.1.222|2020-10-11	USA	CA-CDPH-MC1151507	EPI_ISL_5761485	B.1.1.222	2020-10-11
USA|TX-HMH-MCoV-14700|EPI_ISL_787985|B.1.1.222|2020-10-12	USA	TX-HMH-MCoV-14700	EPI_ISL_787985	B.1.1.222	2020-10-12
USA|TX-HMH-MCoV-14687|EPI_ISL_787972|B.1.1.222|2020-10-12	USA	TX-HMH-MCoV-14687	EPI_ISL_787972	B.1.1.222	2020-10-12
Mexico|CMX-INMEGEN-03-10-38|EPI_ISL_4219705|B.1.1.222|2020-10-12	Mexico	CMX-INMEGEN-03-10-38	EPI_ISL_4219705	B.1.1.222	2020-10-12
Mexico|CMX-INMEGEN-03-10-14|EPI_ISL_4219692|B.1.1.222|2020-10-12	Mexico	CMX-INMEGEN-03-10-14	EPI_ISL_4219692	B.1.1.222	2020-10-12
Mexico|CMX-INER-IBT-0353|EPI_ISL_2839380|B.1.1.222|2020-10-12	Mexico	CMX-INER-IBT-0353	EPI_ISL_2839380	B.1.1.222	2020-10-12
USA|TX-HMH-MCoV-14747|EPI_ISL_786232|B.1.1.222|2020-10-12	USA	TX-HMH-MCoV-14747	EPI_ISL_786232	B.1.1.222	2020-10-12
USA|TX-HMH-MCoV-14865|EPI_ISL_786349|B.1.1.222|2020-10-12	USA	TX-HMH-MCoV-14865	EPI_ISL_786349	B.1.1.222	2020-10-12
USA|CO-CDPHE-2010142198|EPI_ISL_4890562|B.1.1.222|2020-10-12	USA	CO-CDPHE-2010142198	EPI_ISL_4890562	B.1.1.222	2020-10-12
Switzerland|VS-ETHZ-320410|EPI_ISL_737834|B.1.160.20|2020-10-12	Switzerland	VS-ETHZ-320410	EPI_ISL_737834	B.1.160.20	2020-10-12
USA|CA-UCSC-609|EPI_ISL_2082941|B.1.1.222|2020-10-13	USA	CA-UCSC-609	EPI_ISL_2082941	B.1.1.222	2020-10-13
USA|CO-CDPHE-2010141504|EPI_ISL_5931179|B.1.1.222|2020-10-13	USA	CO-CDPHE-2010141504	EPI_ISL_5931179	B.1.1.222	2020-10-13
USA|CO-CDPHE-2010134477|EPI_ISL_4890561|B.1.1.222|2020-10-13	USA	CO-CDPHE-2010134477	EPI_ISL_4890561	B.1.1.222	2020-10-13
USA|CO-CDPHE-2010140868|EPI_ISL_5931139|B.1.1.222|2020-10-13	USA	CO-CDPHE-2010140868	EPI_ISL_5931139	B.1.1.222	2020-10-13
USA|CO-CDPHE-2010141314|EPI_ISL_5931153|B.1.1.222|2020-10-13	USA	CO-CDPHE-2010141314	EPI_ISL_5931153	B.1.1.222	2020-10-13
USA|CO-CDPHE-2010140807|EPI_ISL_5931137|B.1.1.222|2020-10-13	USA	CO-CDPHE-2010140807	EPI_ISL_5931137	B.1.1.222	2020-10-13
USA|CO-CDPHE-2010141491|EPI_ISL_5931176|B.1.1.222|2020-10-13	USA	CO-CDPHE-2010141491	EPI_ISL_5931176	B.1.1.222	2020-10-13
USA|CO-CDPHE-2010141468|EPI_ISL_5931172|B.1.1.222|2020-10-13	USA	CO-CDPHE-2010141468	EPI_ISL_5931172	B.1.1.222	2020-10-13
USA|CO-CDPHE-2010141328|EPI_ISL_5931154|B.1.1.222|2020-10-13	USA	CO-CDPHE-2010141328	EPI_ISL_5931154	B.1.1.222	2020-10-13
Mexico|CMX-INMEGEN-03-10-16|EPI_ISL_4219694|B.1.1.222|2020-10-14	Mexico	CMX-INMEGEN-03-10-16	EPI_ISL_4219694	B.1.1.222	2020-10-14
Mexico|CMX-INMEGEN-03-10-54|EPI_ISL_4219716|B.1.1.222|2020-10-14	Mexico	CMX-INMEGEN-03-10-54	EPI_ISL_4219716	B.1.1.222	2020-10-14
Mexico|CMX-INER-IBT-0352|EPI_ISL_2839377|B.1.1.222|2020-10-14	Mexico	CMX-INER-IBT-0352	EPI_ISL_2839377	B.1.1.222	2020-10-14
Mexico|CMX-INER-IBT-0484|EPI_ISL_3758048|B.1.1.222|2020-10-14	Mexico	CMX-INER-IBT-0484	EPI_ISL_3758048	B.1.1.222	2020-10-14
USA|CO-CDPHE-2010174404|EPI_ISL_4749685|B.1.1.222|2020-10-14	USA	CO-CDPHE-2010174404	EPI_ISL_4749685	B.1.1.222	2020-10-14
USA|CO-CDPHE-2010174427|EPI_ISL_4749680|B.1.1.222|2020-10-14	USA	CO-CDPHE-2010174427	EPI_ISL_4749680	B.1.1.222	2020-10-14
Russia|KDA-RII-MH4936S|EPI_ISL_733289|B.1.1.336|2020-10-14	Russia	KDA-RII-MH4936S	EPI_ISL_733289	B.1.1.336	2020-10-14
Mexico|CMX-INER-IBT-0630|EPI_ISL_4496584|B.1.1.222|2020-10-15	Mexico	CMX-INER-IBT-0630	EPI_ISL_4496584	B.1.1.222	2020-10-15
USA|NM-DOH-2020418425|EPI_ISL_1493403|B.1.1.222|2020-10-15	USA	NM-DOH-2020418425	EPI_ISL_1493403	B.1.1.222	2020-10-15
USA|WI-WSLH-201505|EPI_ISL_803696|B.1.1.222|2020-10-15	USA	WI-WSLH-201505	EPI_ISL_803696	B.1.1.222	2020-10-15
USA|NM-DOH-2020418882|EPI_ISL_1493411|B.1.1.222|2020-10-15	USA	NM-DOH-2020418882	EPI_ISL_1493411	B.1.1.222	2020-10-15
USA|CA-SEARCH-8843|EPI_ISL_1969306|B.1.1.222|2020-10-15	USA	CA-SEARCH-8843	EPI_ISL_1969306	B.1.1.222	2020-10-15
USA|CA-UCSC-924|EPI_ISL_2295507|B.1.1.222|2020-10-15	USA	CA-UCSC-924	EPI_ISL_2295507	B.1.1.222	2020-10-15
USA|TX-HMH-MCoV-14993|EPI_ISL_786477|B.1.1.222|2020-10-15	USA	TX-HMH-MCoV-14993	EPI_ISL_786477	B.1.1.222	2020-10-15
USA|NM-DOH-2020420471|EPI_ISL_1493434|B.1.1.222|2020-10-15	USA	NM-DOH-2020420471	EPI_ISL_1493434	B.1.1.222	2020-10-15
USA|CA-CZB-12867|EPI_ISL_648522|B.1.1.222|2020-10-15	USA	CA-CZB-12867	EPI_ISL_648522	B.1.1.222	2020-10-15
Mexico|CMX-INER-IBT-0629|EPI_ISL_4496583|B.1.1.222|2020-10-15	Mexico	CMX-INER-IBT-0629	EPI_ISL_4496583	B.1.1.222	2020-10-15
USA|CA-CDPH-MC1191719|EPI_ISL_5696179|B.1.1.222|2020-10-16	USA	CA-CDPH-MC1191719	EPI_ISL_5696179	B.1.1.222	2020-10-16
Mexico|CMX-InDRE_166|EPI_ISL_913967|B.1.1.222|2020-10-16	Mexico	CMX-InDRE_166	EPI_ISL_913967	B.1.1.222	2020-10-16
USA|CA-CDPH-MC1191306|EPI_ISL_5696166|B.1.1.222|2020-10-16	USA	CA-CDPH-MC1191306	EPI_ISL_5696166	B.1.1.222	2020-10-16
USA|CA-CDPH-1002004604|EPI_ISL_5934493|B.1.1.222|2020-10-16	USA	CA-CDPH-1002004604	EPI_ISL_5934493	B.1.1.222	2020-10-16
USA|IL-IDPH-COO-I-000196|EPI_ISL_3254957|B.1.1.222|2020-10-16	USA	IL-IDPH-COO-I-000196	EPI_ISL_3254957	B.1.1.222	2020-10-16
USA|CA-CDPH-MC1193634|EPI_ISL_5696214|B.1.1.222|2020-10-16	USA	CA-CDPH-MC1193634	EPI_ISL_5696214	B.1.1.222	2020-10-16
USA|CA-CDPH-MC1191789|EPI_ISL_5696181|B.1.1.222|2020-10-16	USA	CA-CDPH-MC1191789	EPI_ISL_5696181	B.1.1.222	2020-10-16
USA|CA-CDPH-MC1191776|EPI_ISL_5696180|B.1.1.222|2020-10-16	USA	CA-CDPH-MC1191776	EPI_ISL_5696180	B.1.1.222	2020-10-16
USA|CA-CDPH-MC1191835|EPI_ISL_5696183|B.1.1.222|2020-10-16	USA	CA-CDPH-MC1191835	EPI_ISL_5696183	B.1.1.222	2020-10-16
USA|CA-CDPH-MC1193433|EPI_ISL_5696205|B.1.1.222|2020-10-16	USA	CA-CDPH-MC1193433	EPI_ISL_5696205	B.1.1.222	2020-10-16
Mexico|CMX-INMEGEN-03-10-60|EPI_ISL_4219720|B.1.1.222|2020-10-16	Mexico	CMX-INMEGEN-03-10-60	EPI_ISL_4219720	B.1.1.222	2020-10-16
USA|CO-CDPHE-2010170804|EPI_ISL_4749640|B.1.1.222|2020-10-16	USA	CO-CDPHE-2010170804	EPI_ISL_4749640	B.1.1.222	2020-10-16
USA|CO-CDPHE-2010170870|EPI_ISL_4749631|B.1.1.222|2020-10-16	USA	CO-CDPHE-2010170870	EPI_ISL_4749631	B.1.1.222	2020-10-16
USA|CO-CDPHE-2010170836|EPI_ISL_4749639|B.1.1.222|2020-10-16	USA	CO-CDPHE-2010170836	EPI_ISL_4749639	B.1.1.222	2020-10-16
USA|CO-CDPHE-2010170106|EPI_ISL_4749637|B.1.1.222|2020-10-16	USA	CO-CDPHE-2010170106	EPI_ISL_4749637	B.1.1.222	2020-10-16
USA|CO-CDPHE-2010165618|EPI_ISL_4749617|B.1.1.222|2020-10-16	USA	CO-CDPHE-2010165618	EPI_ISL_4749617	B.1.1.222	2020-10-16
USA|CO-CDPHE-2010170313|EPI_ISL_5931294|B.1.1.222|2020-10-16	USA	CO-CDPHE-2010170313	EPI_ISL_5931294	B.1.1.222	2020-10-16
USA|CO-CDPHE-2010170338|EPI_ISL_4749648|B.1.1.222|2020-10-16	USA	CO-CDPHE-2010170338	EPI_ISL_4749648	B.1.1.222	2020-10-16
USA|CO-CDPHE-2010170052|EPI_ISL_4749611|B.1.1.222|2020-10-16	USA	CO-CDPHE-2010170052	EPI_ISL_4749611	B.1.1.222	2020-10-16
USA|CO-CDPHE-2010166015|EPI_ISL_4750008|B.1.1.222|2020-10-16	USA	CO-CDPHE-2010166015	EPI_ISL_4750008	B.1.1.222	2020-10-16
USA|CO-CDPHE-2010170039|EPI_ISL_5931293|B.1.1.222|2020-10-16	USA	CO-CDPHE-2010170039	EPI_ISL_5931293	B.1.1.222	2020-10-16
USA|CA-CDPH-1002004614|EPI_ISL_5934503|B.1.1.222|2020-10-17	USA	CA-CDPH-1002004614	EPI_ISL_5934503	B.1.1.222	2020-10-17
USA|CA-UCSC-626|EPI_ISL_2082956|B.1.1.222|2020-10-17	USA	CA-UCSC-626	EPI_ISL_2082956	B.1.1.222	2020-10-17
USA|CA-UCSC-678|EPI_ISL_2083004|B.1.1.222|2020-10-17	USA	CA-UCSC-678	EPI_ISL_2083004	B.1.1.222	2020-10-17
England|ALDP-A86554|EPI_ISL_606241|B.1.177.35|2020-10-17	England	ALDP-A86554	EPI_ISL_606241	B.1.177.35	2020-10-17
Canada|BC-BCCDC-6150|EPI_ISL_545497|B.1.36.37|2020-10-17	Canada	BC-BCCDC-6150	EPI_ISL_545497	B.1.36.37	2020-10-17
USA|ND-NDDH-2909|EPI_ISL_3062139|B.1.1.222|2020-10-18	USA	ND-NDDH-2909	EPI_ISL_3062139	B.1.1.222	2020-10-18
Switzerland|BE-ETHZ-330427|EPI_ISL_614910|B.1.177.28|2020-10-18	Switzerland	BE-ETHZ-330427	EPI_ISL_614910	B.1.177.28	2020-10-18
USA|TX-HMH-MCoV-15240|EPI_ISL_786724|B.1.1.222|2020-10-19	USA	TX-HMH-MCoV-15240	EPI_ISL_786724	B.1.1.222	2020-10-19
USA|CA-ALSR-4404|EPI_ISL_649010|B.1.1.222|2020-10-19	USA	CA-ALSR-4404	EPI_ISL_649010	B.1.1.222	2020-10-19
USA|CA-ALSR-4398|EPI_ISL_649006|B.1.1.222|2020-10-19	USA	CA-ALSR-4398	EPI_ISL_649006	B.1.1.222	2020-10-19
Mexico|MEX-InDRE_121|EPI_ISL_913925|B.1.1.222|2020-10-19	Mexico	MEX-InDRE_121	EPI_ISL_913925	B.1.1.222	2020-10-19
USA|CO-CDPHE-2010224708|EPI_ISL_4750009|B.1.1.222|2020-10-19	USA	CO-CDPHE-2010224708	EPI_ISL_4750009	B.1.1.222	2020-10-19
USA|UT-UPHL-2012527409|EPI_ISL_746238|B.1.1.222|2020-10-19	USA	UT-UPHL-2012527409	EPI_ISL_746238	B.1.1.222	2020-10-19
USA|CA-CDPH-MC1201165|EPI_ISL_5696363|B.1.1.222|2020-10-19	USA	CA-CDPH-MC1201165	EPI_ISL_5696363	B.1.1.222	2020-10-19
USA|CO-CDPHE-2010200390|EPI_ISL_710238|B.1.1.222|2020-10-19	USA	CO-CDPHE-2010200390	EPI_ISL_710238	B.1.1.222	2020-10-19
USA|CO-CDPHE-2010223072|EPI_ISL_4749973|B.1.1.222|2020-10-19	USA	CO-CDPHE-2010223072	EPI_ISL_4749973	B.1.1.222	2020-10-19
USA|TX-HMH-MCoV-15293|EPI_ISL_786777|B.1.1.222|2020-10-19	USA	TX-HMH-MCoV-15293	EPI_ISL_786777	B.1.1.222	2020-10-19
USA|CO-CDPHE-2010200579|EPI_ISL_710239|B.1.1.222|2020-10-19	USA	CO-CDPHE-2010200579	EPI_ISL_710239	B.1.1.222	2020-10-19
USA|CO-CDPHE-2010200648|EPI_ISL_710355|B.1.1.222|2020-10-19	USA	CO-CDPHE-2010200648	EPI_ISL_710355	B.1.1.222	2020-10-19
USA|CO-CDPHE-2010200815|EPI_ISL_710357|B.1.1.222|2020-10-19	USA	CO-CDPHE-2010200815	EPI_ISL_710357	B.1.1.222	2020-10-19
USA|CO-CDPHE-2010210961|EPI_ISL_4749977|B.1.1.222|2020-10-19	USA	CO-CDPHE-2010210961	EPI_ISL_4749977	B.1.1.222	2020-10-19
USA|CO-CDPHE-2010200546|EPI_ISL_677318|B.1.1.222|2020-10-19	USA	CO-CDPHE-2010200546	EPI_ISL_677318	B.1.1.222	2020-10-19
USA|CO-CDPHE-2010200764|EPI_ISL_710356|B.1.1.222|2020-10-19	USA	CO-CDPHE-2010200764	EPI_ISL_710356	B.1.1.222	2020-10-19
USA|CO-CDPHE-2010200348|EPI_ISL_710237|B.1.1.222|2020-10-19	USA	CO-CDPHE-2010200348	EPI_ISL_710237	B.1.1.222	2020-10-19
USA|CO-CDPHE-2010201090|EPI_ISL_710358|B.1.1.222|2020-10-19	USA	CO-CDPHE-2010201090	EPI_ISL_710358	B.1.1.222	2020-10-19
USA|CA-CDPH-MC1204657|EPI_ISL_5761507|B.1.1.222|2020-10-19	USA	CA-CDPH-MC1204657	EPI_ISL_5761507	B.1.1.222	2020-10-19
USA|CA-CDPH-MC1208747|EPI_ISL_5696438|B.1.1.222|2020-10-20	USA	CA-CDPH-MC1208747	EPI_ISL_5696438	B.1.1.222	2020-10-20
USA|CO-CDPHE-2010240847|EPI_ISL_3403820|B.1.1.222|2020-10-20	USA	CO-CDPHE-2010240847	EPI_ISL_3403820	B.1.1.222	2020-10-20
USA|OR-OHSU-3527|EPI_ISL_832503|B.1.1.222|2020-10-20	USA	OR-OHSU-3527	EPI_ISL_832503	B.1.1.222	2020-10-20
USA|MI-UM-10036535538|EPI_ISL_640150|B.1.1.222|2020-10-20	USA	MI-UM-10036535538	EPI_ISL_640150	B.1.1.222	2020-10-20
USA|MI-UM-10036535366|EPI_ISL_640144|B.1.1.222|2020-10-20	USA	MI-UM-10036535366	EPI_ISL_640144	B.1.1.222	2020-10-20
Mexico|MEX-InDRE_124|EPI_ISL_913928|B.1.1.222|2020-10-20	Mexico	MEX-InDRE_124	EPI_ISL_913928	B.1.1.222	2020-10-20
USA|CO-CDPHE-2010211969|EPI_ISL_4749864|B.1.1.222|2020-10-20	USA	CO-CDPHE-2010211969	EPI_ISL_4749864	B.1.1.222	2020-10-20
USA|CO-CDPHE-2010211956|EPI_ISL_4749865|B.1.1.222|2020-10-20	USA	CO-CDPHE-2010211956	EPI_ISL_4749865	B.1.1.222	2020-10-20
USA|MI-UM-10036537564|EPI_ISL_640156|B.1.1.222|2020-10-20	USA	MI-UM-10036537564	EPI_ISL_640156	B.1.1.222	2020-10-20
Rwanda|NRLNAT1048|EPI_ISL_925883|A.23.1|2020-10-21	Rwanda	NRLNAT1048	EPI_ISL_925883	A.23.1	2020-10-21
England|MILK-ACC112|EPI_ISL_629268|AC.1|2020-10-21	England	MILK-ACC112	EPI_ISL_629268	AC.1	2020-10-21
USA|CA-ALSR-4837|EPI_ISL_730170|B.1.1.222|2020-10-21	USA	CA-ALSR-4837	EPI_ISL_730170	B.1.1.222	2020-10-21
USA|AZ-TG935432|EPI_ISL_2769261|B.1.1.222|2020-10-21	USA	AZ-TG935432	EPI_ISL_2769261	B.1.1.222	2020-10-21
Luxembourg|LNS3577548|EPI_ISL_740336|B.1.1.222|2020-10-21	Luxembourg	LNS3577548	EPI_ISL_740336	B.1.1.222	2020-10-21
Wales|ALDP-AA308D|EPI_ISL_634761|AA.4|2020-10-22	Wales	ALDP-AA308D	EPI_ISL_634761	AA.4	2020-10-22
USA|CA-LACPHL-AF01420|EPI_ISL_2812025|B.1.1.222|2020-10-22	USA	CA-LACPHL-AF01420	EPI_ISL_2812025	B.1.1.222	2020-10-22
USA|CA-ALSR-5917|EPI_ISL_878651|B.1.1.222|2020-10-22	USA	CA-ALSR-5917	EPI_ISL_878651	B.1.1.222	2020-10-22
USA|CA-ALSR-5938|EPI_ISL_878690|B.1.1.222|2020-10-22	USA	CA-ALSR-5938	EPI_ISL_878690	B.1.1.222	2020-10-22
Mexico|CMX-INMEGEN-03-11-124|EPI_ISL_4219761|B.1.1.222|2020-10-22	Mexico	CMX-INMEGEN-03-11-124	EPI_ISL_4219761	B.1.1.222	2020-10-22
USA|NY-PRL-2021_0706_51A13|EPI_ISL_2923966|B.1.1.222|2020-10-22	USA	NY-PRL-2021_0706_51A13	EPI_ISL_2923966	B.1.1.222	2020-10-22
USA|CO-CDPHE-2010226139|EPI_ISL_4750159|B.1.1.222|2020-10-22	USA	CO-CDPHE-2010226139	EPI_ISL_4750159	B.1.1.222	2020-10-22
Japan|IC-0260|EPI_ISL_667689|AM.1|2020-10-23	Japan	IC-0260	EPI_ISL_667689	AM.1	2020-10-23
USA|CA-CZB-13489|EPI_ISL_672522|B.1.1.222|2020-10-23	USA	CA-CZB-13489	EPI_ISL_672522	B.1.1.222	2020-10-23
USA|AZ-TG761482|EPI_ISL_1297119|B.1.1.222|2020-10-23	USA	AZ-TG761482	EPI_ISL_1297119	B.1.1.222	2020-10-23
Mexico|CMX-INER-IBT-0488|EPI_ISL_3758052|B.1.1.222|2020-10-23	Mexico	CMX-INER-IBT-0488	EPI_ISL_3758052	B.1.1.222	2020-10-23
Belarus|ChVir21891|EPI_ISL_860797|B.1.1.374|2020-10-23	Belarus	ChVir21891	EPI_ISL_860797	B.1.1.374	2020-10-23
England|204393759|EPI_ISL_649884|B.1.177.30|2020-10-23	England	204393759	EPI_ISL_649884	B.1.177.30	2020-10-23
Luxembourg|LNS2593581|EPI_ISL_740149|B.1.177.85|2020-10-23	Luxembourg	LNS2593581	EPI_ISL_740149	B.1.177.85	2020-10-23
USA|CA-CZB-13486|EPI_ISL_672524|B.1.1.222|2020-10-24	USA	CA-CZB-13486	EPI_ISL_672524	B.1.1.222	2020-10-24
USA|WA-QDX-3564|EPI_ISL_876867|B.1.1.222|2020-10-25	USA	WA-QDX-3564	EPI_ISL_876867	B.1.1.222	2020-10-25
USA|VA-NIDDL-27852|EPI_ISL_1624329|B.1.539|2020-10-25	USA	VA-NIDDL-27852	EPI_ISL_1624329	B.1.539	2020-10-25
USA|TX-HMH-MCoV-15606|EPI_ISL_787090|B.1.1.222|2020-10-26	USA	TX-HMH-MCoV-15606	EPI_ISL_787090	B.1.1.222	2020-10-26
USA|WI-UW-5186|EPI_ISL_2295259|B.1.1.222|2020-10-26	USA	WI-UW-5186	EPI_ISL_2295259	B.1.1.222	2020-10-26
USA|TX-HMH-MCoV-15605|EPI_ISL_787089|B.1.1.222|2020-10-26	USA	TX-HMH-MCoV-15605	EPI_ISL_787089	B.1.1.222	2020-10-26
USA|TX-CDC-2-3693566|EPI_ISL_747146|B.1.1.222|2020-10-26	USA	TX-CDC-2-3693566	EPI_ISL_747146	B.1.1.222	2020-10-26
USA|TX-DSHS-2096|EPI_ISL_831332|B.1.1.222|2020-10-26	USA	TX-DSHS-2096	EPI_ISL_831332	B.1.1.222	2020-10-26
Belarus|ChVir21889|EPI_ISL_860817|B.1.1.422|2020-10-26	Belarus	ChVir21889	EPI_ISL_860817	B.1.1.422	2020-10-26
Denmark|DCGC-8549|EPI_ISL_625897|B.1.127|2020-10-26	Denmark	DCGC-8549	EPI_ISL_625897	B.1.127	2020-10-26
Mexico|CMX-INMEGEN-03-11-144|EPI_ISL_4219773|B.1.1.222|2020-10-27	Mexico	CMX-INMEGEN-03-11-144	EPI_ISL_4219773	B.1.1.222	2020-10-27
Taiwan|CGMH-CGU-37|EPI_ISL_956317|B.1.1.222|2020-10-27	Taiwan	CGMH-CGU-37	EPI_ISL_956317	B.1.1.222	2020-10-27
USA|AZ-TG954804|EPI_ISL_2919663|B.1.1.222|2020-10-27	USA	AZ-TG954804	EPI_ISL_2919663	B.1.1.222	2020-10-27
USA|MD-MDH-0380|EPI_ISL_660078|B.1.1.222|2020-10-27	USA	MD-MDH-0380	EPI_ISL_660078	B.1.1.222	2020-10-27
USA|TX-HMH-MCoV-16116|EPI_ISL_785800|B.1.1.222|2020-10-27	USA	TX-HMH-MCoV-16116	EPI_ISL_785800	B.1.1.222	2020-10-27
USA|TX-HMH-MCoV-15552|EPI_ISL_787036|B.1.1.222|2020-10-27	USA	TX-HMH-MCoV-15552	EPI_ISL_787036	B.1.1.222	2020-10-27
USA|CA-LACPHL-AF01357|EPI_ISL_2811932|B.1.1.222|2020-10-27	USA	CA-LACPHL-AF01357	EPI_ISL_2811932	B.1.1.222	2020-10-27
USA|AZ-TG1047088|EPI_ISL_4877001|B.1.1.222|2020-10-27	USA	AZ-TG1047088	EPI_ISL_4877001	B.1.1.222	2020-10-27
Spain|VC-IBV-98014553|EPI_ISL_1916150|B.1.177.47|2020-10-27	Spain	VC-IBV-98014553	EPI_ISL_1916150	B.1.177.47	2020-10-27
Mexico|CMX-INMEGEN-03-10-24|EPI_ISL_4219699|B.1.1.222|2020-10-28	Mexico	CMX-INMEGEN-03-10-24	EPI_ISL_4219699	B.1.1.222	2020-10-28
Mexico|CMX-INER-IBT-0632|EPI_ISL_4496586|B.1.1.222|2020-10-28	Mexico	CMX-INER-IBT-0632	EPI_ISL_4496586	B.1.1.222	2020-10-28
Mexico|CMX-INER-IBT-0802|EPI_ISL_4888475|B.1.1.222|2020-10-28	Mexico	CMX-INER-IBT-0802	EPI_ISL_4888475	B.1.1.222	2020-10-28
USA|OR-OHSU-3857|EPI_ISL_832592|B.1.1.222|2020-10-28	USA	OR-OHSU-3857	EPI_ISL_832592	B.1.1.222	2020-10-28
USA|OR-OHSU-4047|EPI_ISL_832632|B.1.1.222|2020-10-28	USA	OR-OHSU-4047	EPI_ISL_832632	B.1.1.222	2020-10-28
USA|OR-OHSU-4045|EPI_ISL_1541215|B.1.1.222|2020-10-28	USA	OR-OHSU-4045	EPI_ISL_1541215	B.1.1.222	2020-10-28
USA|OR-OHSU-4051|EPI_ISL_832633|B.1.1.222|2020-10-28	USA	OR-OHSU-4051	EPI_ISL_832633	B.1.1.222	2020-10-28
USA|AZ-TG954913|EPI_ISL_2919636|B.1.1.222|2020-10-28	USA	AZ-TG954913	EPI_ISL_2919636	B.1.1.222	2020-10-28
USA|CO-CDPHE-2010316536|EPI_ISL_6581790|B.1.1.222|2020-10-28	USA	CO-CDPHE-2010316536	EPI_ISL_6581790	B.1.1.222	2020-10-28
USA|CO-CDPHE-2010316331|EPI_ISL_1038851|B.1.1.222|2020-10-28	USA	CO-CDPHE-2010316331	EPI_ISL_1038851	B.1.1.222	2020-10-28
USA|CO-CDPHE-2010316541|EPI_ISL_6581875|B.1.1.222|2020-10-28	USA	CO-CDPHE-2010316541	EPI_ISL_6581875	B.1.1.222	2020-10-28
USA|CO-CDPHE-2010315914|EPI_ISL_1038848|B.1.1.222|2020-10-28	USA	CO-CDPHE-2010315914	EPI_ISL_1038848	B.1.1.222	2020-10-28
USA|CO-CDPHE-2010316459|EPI_ISL_6581835|B.1.1.222|2020-10-28	USA	CO-CDPHE-2010316459	EPI_ISL_6581835	B.1.1.222	2020-10-28
USA|CO-CDPHE-2010315790|EPI_ISL_1038847|B.1.1.222|2020-10-28	USA	CO-CDPHE-2010315790	EPI_ISL_1038847	B.1.1.222	2020-10-28
USA|CO-CDPHE-2010316103|EPI_ISL_1038850|B.1.1.222|2020-10-28	USA	CO-CDPHE-2010316103	EPI_ISL_1038850	B.1.1.222	2020-10-28
USA|CO-CDPHE-2010316465|EPI_ISL_6581793|B.1.1.222|2020-10-28	USA	CO-CDPHE-2010316465	EPI_ISL_6581793	B.1.1.222	2020-10-28
USA|CO-CDPHE-2010316305|EPI_ISL_1169696|B.1.1.222|2020-10-28	USA	CO-CDPHE-2010316305	EPI_ISL_1169696	B.1.1.222	2020-10-28
USA|CO-CDPHE-2010314098|EPI_ISL_1233977|B.1.1.222|2020-10-28	USA	CO-CDPHE-2010314098	EPI_ISL_1233977	B.1.1.222	2020-10-28
USA|CO-CDPHE-2010315765|EPI_ISL_6581892|B.1.1.222|2020-10-28	USA	CO-CDPHE-2010315765	EPI_ISL_6581892	B.1.1.222	2020-10-28
USA|CO-CDPHE-2010314185|EPI_ISL_1169694|B.1.1.222|2020-10-28	USA	CO-CDPHE-2010314185	EPI_ISL_1169694	B.1.1.222	2020-10-28
USA|CO-CDPHE-2010314170|EPI_ISL_1540133|B.1.1.222|2020-10-28	USA	CO-CDPHE-2010314170	EPI_ISL_1540133	B.1.1.222	2020-10-28
USA|CO-CDPHE-2010316483|EPI_ISL_6581813|B.1.1.222|2020-10-28	USA	CO-CDPHE-2010316483	EPI_ISL_6581813	B.1.1.222	2020-10-28
USA|CO-CDPHE-2010316050|EPI_ISL_1169695|B.1.1.222|2020-10-28	USA	CO-CDPHE-2010316050	EPI_ISL_1169695	B.1.1.222	2020-10-28
USA|CO-CDPHE-2010316035|EPI_ISL_1038849|B.1.1.222|2020-10-28	USA	CO-CDPHE-2010316035	EPI_ISL_1038849	B.1.1.222	2020-10-28
USA|CO-CDPHE-2010315892|EPI_ISL_1233978|B.1.1.222|2020-10-28	USA	CO-CDPHE-2010315892	EPI_ISL_1233978	B.1.1.222	2020-10-28
USA|CO-CDPHE-2010316516|EPI_ISL_1233981|B.1.1.222|2020-10-28	USA	CO-CDPHE-2010316516	EPI_ISL_1233981	B.1.1.222	2020-10-28
USA|CO-CDPHE-2010316453|EPI_ISL_1233980|B.1.1.222|2020-10-28	USA	CO-CDPHE-2010316453	EPI_ISL_1233980	B.1.1.222	2020-10-28
USA|CO-CDPHE-2010315767|EPI_ISL_6581866|B.1.1.222|2020-10-28	USA	CO-CDPHE-2010315767	EPI_ISL_6581866	B.1.1.222	2020-10-28
Mexico|CMX-INMEGEN-03-10-32|EPI_ISL_4219703|B.1.1.222|2020-10-28	Mexico	CMX-INMEGEN-03-10-32	EPI_ISL_4219703	B.1.1.222	2020-10-28
USA|MI-UM-10036686754|EPI_ISL_682079|B.1.1.222|2020-10-29	USA	MI-UM-10036686754	EPI_ISL_682079	B.1.1.222	2020-10-29
USA|NM-UNM-02212|EPI_ISL_1791085|B.1.1.222|2020-10-29	USA	NM-UNM-02212	EPI_ISL_1791085	B.1.1.222	2020-10-29
Mexico|CMX-INER-IBT-0637|EPI_ISL_4496591|B.1.1.222|2020-10-29	Mexico	CMX-INER-IBT-0637	EPI_ISL_4496591	B.1.1.222	2020-10-29
USA|TX-HMH-MCoV-16278|EPI_ISL_785962|B.1.1.222|2020-10-30	USA	TX-HMH-MCoV-16278	EPI_ISL_785962	B.1.1.222	2020-10-30
USA|AZ-TG877512|EPI_ISL_2281542|B.1.1.222|2020-10-30	USA	AZ-TG877512	EPI_ISL_2281542	B.1.1.222	2020-10-30
Mexico|CMX-INER-IBT-0627|EPI_ISL_4496581|B.1.1.222|2020-10-30	Mexico	CMX-INER-IBT-0627	EPI_ISL_4496581	B.1.1.222	2020-10-30
USA|OR-OHSU-4145|EPI_ISL_832662|B.1.1.222|2020-10-30	USA	OR-OHSU-4145	EPI_ISL_832662	B.1.1.222	2020-10-30
USA|CA-ALSR-4501|EPI_ISL_666971|B.1.1.222|2020-10-30	USA	CA-ALSR-4501	EPI_ISL_666971	B.1.1.222	2020-10-30
USA|MN-MDH-2087|EPI_ISL_683716|B.1.1.222|2020-10-30	USA	MN-MDH-2087	EPI_ISL_683716	B.1.1.222	2020-10-30
USA|CO-QDX-3407|EPI_ISL_884318|B.1.1.222|2020-10-30	USA	CO-QDX-3407	EPI_ISL_884318	B.1.1.222	2020-10-30
USA|NY-NYCPHL-001181|EPI_ISL_671760|B.1.1.222|2020-10-30	USA	NY-NYCPHL-001181	EPI_ISL_671760	B.1.1.222	2020-10-30
USA|CA-CZB-26099|EPI_ISL_1477262|B.1.1.222|2020-10-31	USA	CA-CZB-26099	EPI_ISL_1477262	B.1.1.222	2020-10-31
USA|TX-HMH-MCoV-16314|EPI_ISL_785998|B.1.1.222|2020-11-01	USA	TX-HMH-MCoV-16314	EPI_ISL_785998	B.1.1.222	2020-11-01
USA|TX-HMH-MCoV-16326|EPI_ISL_786010|B.1.1.222|2020-11-01	USA	TX-HMH-MCoV-16326	EPI_ISL_786010	B.1.1.222	2020-11-01
Mexico|YUC-NYGC-55953-20|EPI_ISL_3023829|B.1.1.222|2020-11-01	Mexico	YUC-NYGC-55953-20	EPI_ISL_3023829	B.1.1.222	2020-11-01
USA|DC-DFS-PHL-0385|EPI_ISL_1595745|B.1.1.519|2020-11-01	USA	DC-DFS-PHL-0385	EPI_ISL_1595745	B.1.1.519	2020-11-01
USA|CA-CHLA-PLM97759218|EPI_ISL_753324|B.1.438.4|2020-11-01	USA	CA-CHLA-PLM97759218	EPI_ISL_753324	B.1.438.4	2020-11-01
Denmark|DCGC-10343|EPI_ISL_669913|AD.1|2020-11-02	Denmark	DCGC-10343	EPI_ISL_669913	AD.1	2020-11-02
Mexico|CMX-INMEGEN-03-11-150|EPI_ISL_4219779|B.1.1.222|2020-11-02	Mexico	CMX-INMEGEN-03-11-150	EPI_ISL_4219779	B.1.1.222	2020-11-02
USA|AZ-TG780037|EPI_ISL_1465347|B.1.1.222|2020-11-02	USA	AZ-TG780037	EPI_ISL_1465347	B.1.1.222	2020-11-02
USA|NM-NMDOH-2020478179|EPI_ISL_1261566|B.1.1.222|2020-11-02	USA	NM-NMDOH-2020478179	EPI_ISL_1261566	B.1.1.222	2020-11-02
USA|TX-HMH-MCoV-16431|EPI_ISL_1202141|B.1.1.222|2020-11-02	USA	TX-HMH-MCoV-16431	EPI_ISL_1202141	B.1.1.222	2020-11-02
USA|CA-CZB-26103|EPI_ISL_1477410|B.1.1.222|2020-11-02	USA	CA-CZB-26103	EPI_ISL_1477410	B.1.1.222	2020-11-02
USA|CA-CZB-26102|EPI_ISL_1477170|B.1.1.222|2020-11-02	USA	CA-CZB-26102	EPI_ISL_1477170	B.1.1.222	2020-11-02
USA|OR-OHSU-4158|EPI_ISL_1170960|B.1.1.222|2020-11-02	USA	OR-OHSU-4158	EPI_ISL_1170960	B.1.1.222	2020-11-02
USA|KS-CDC-2-3693581|EPI_ISL_747140|B.1.1.222|2020-11-02	USA	KS-CDC-2-3693581	EPI_ISL_747140	B.1.1.222	2020-11-02
USA|NY-MSHSPSP-PV22428|EPI_ISL_1300986|B.1.1.222|2020-11-02	USA	NY-MSHSPSP-PV22428	EPI_ISL_1300986	B.1.1.222	2020-11-02
Mexico|AGS-InDRE-82|EPI_ISL_658873|B.1.1.222|2020-11-02	Mexico	AGS-InDRE-82	EPI_ISL_658873	B.1.1.222	2020-11-02
Mexico|AGS-InDRE-78|EPI_ISL_658863|B.1.1.222|2020-11-02	Mexico	AGS-InDRE-78	EPI_ISL_658863	B.1.1.222	2020-11-02
Mexico|AGS-InDRE-80|EPI_ISL_658868|B.1.1.222|2020-11-02	Mexico	AGS-InDRE-80	EPI_ISL_658868	B.1.1.222	2020-11-02
USA|MN-MDH-2043|EPI_ISL_654724|B.1.1.222|2020-11-02	USA	MN-MDH-2043	EPI_ISL_654724	B.1.1.222	2020-11-02
USA|NY-PRL-2021_0702_52E13|EPI_ISL_2923890|B.1.1.222|2020-11-02	USA	NY-PRL-2021_0702_52E13	EPI_ISL_2923890	B.1.1.222	2020-11-02
USA|CA-CZB-13336|EPI_ISL_672438|B.1.1.222|2020-11-02	USA	CA-CZB-13336	EPI_ISL_672438	B.1.1.222	2020-11-02
USA|WY-WYPHL-20118708|EPI_ISL_2404765|B.1.1.222|2020-11-03	USA	WY-WYPHL-20118708	EPI_ISL_2404765	B.1.1.222	2020-11-03
USA|AZ-TG795505|EPI_ISL_1530844|B.1.1.222|2020-11-03	USA	AZ-TG795505	EPI_ISL_1530844	B.1.1.222	2020-11-03
USA|KS-CDC-2-3714086|EPI_ISL_751572|B.1.1.222|2020-11-03	USA	KS-CDC-2-3714086	EPI_ISL_751572	B.1.1.222	2020-11-03
Mexico|QRO-InDRE-90|EPI_ISL_658893|B.1.1.222|2020-11-03	Mexico	QRO-InDRE-90	EPI_ISL_658893	B.1.1.222	2020-11-03
USA|AZ-TG794400|EPI_ISL_1500738|B.1.1.222|2020-11-03	USA	AZ-TG794400	EPI_ISL_1500738	B.1.1.222	2020-11-03
USA|TX-HMH-MCoV-16418|EPI_ISL_1202128|B.1.1.222|2020-11-03	USA	TX-HMH-MCoV-16418	EPI_ISL_1202128	B.1.1.222	2020-11-03
Wales|PHWC-48B3D3|EPI_ISL_666232|AA.7|2020-11-04	Wales	PHWC-48B3D3	EPI_ISL_666232	AA.7	2020-11-04
Mexico|CMX-INER-IBT-0807|EPI_ISL_4888480|B.1.1.222|2020-11-04	Mexico	CMX-INER-IBT-0807	EPI_ISL_4888480	B.1.1.222	2020-11-04
Mexico|CMX-INER-IBT-0787|EPI_ISL_4888460|B.1.1.222|2020-11-04	Mexico	CMX-INER-IBT-0787	EPI_ISL_4888460	B.1.1.222	2020-11-04
USA|CA-CZB-14161|EPI_ISL_738916|B.1.1.222|2020-11-04	USA	CA-CZB-14161	EPI_ISL_738916	B.1.1.222	2020-11-04
USA|CA-CZB-14162|EPI_ISL_739567|B.1.1.222|2020-11-04	USA	CA-CZB-14162	EPI_ISL_739567	B.1.1.222	2020-11-04
USA|CA-CZB-14163|EPI_ISL_2658745|B.1.1.222|2020-11-04	USA	CA-CZB-14163	EPI_ISL_2658745	B.1.1.222	2020-11-04
USA|CA-CZB-14431|EPI_ISL_738895|B.1.1.222|2020-11-04	USA	CA-CZB-14431	EPI_ISL_738895	B.1.1.222	2020-11-04
USA|AZ-TG794545|EPI_ISL_1500809|B.1.1.222|2020-11-04	USA	AZ-TG794545	EPI_ISL_1500809	B.1.1.222	2020-11-04
USA|OR-OHSU-4226|EPI_ISL_2035655|B.1.1.222|2020-11-04	USA	OR-OHSU-4226	EPI_ISL_2035655	B.1.1.222	2020-11-04
USA|KS-KHEL-0277|EPI_ISL_1110573|B.1.1.222|2020-11-04	USA	KS-KHEL-0277	EPI_ISL_1110573	B.1.1.222	2020-11-04
USA|AL-Coffee-JEGT|EPI_ISL_876484|B.1.1.222|2020-11-04	USA	AL-Coffee-JEGT	EPI_ISL_876484	B.1.1.222	2020-11-04
USA|NY-PRL-2021_0702_51I06|EPI_ISL_2923896|B.1.1.222|2020-11-04	USA	NY-PRL-2021_0702_51I06	EPI_ISL_2923896	B.1.1.222	2020-11-04
USA|CA-ALSR-4683|EPI_ISL_667075|B.1.1.222|2020-11-04	USA	CA-ALSR-4683	EPI_ISL_667075	B.1.1.222	2020-11-04
USA|FL-BPHL-2548|EPI_ISL_848861|B.1.1.222|2020-11-04	USA	FL-BPHL-2548	EPI_ISL_848861	B.1.1.222	2020-11-04
USA|FL-BPHL-2547|EPI_ISL_848860|B.1.1.222|2020-11-04	USA	FL-BPHL-2547	EPI_ISL_848860	B.1.1.222	2020-11-04
USA|FL-BPHL-2546|EPI_ISL_848870|B.1.1.222|2020-11-04	USA	FL-BPHL-2546	EPI_ISL_848870	B.1.1.222	2020-11-04
USA|WY-WYPHL-20119657|EPI_ISL_3025322|B.1.1.222|2020-11-04	USA	WY-WYPHL-20119657	EPI_ISL_3025322	B.1.1.222	2020-11-04
USA|FL-BPHL-2461|EPI_ISL_848865|B.1.1.222|2020-11-04	USA	FL-BPHL-2461	EPI_ISL_848865	B.1.1.222	2020-11-04
USA|CA-ALSR-4867|EPI_ISL_730187|B.1.1.222|2020-11-04	USA	CA-ALSR-4867	EPI_ISL_730187	B.1.1.222	2020-11-04
Mexico|CMX-INER-IBT-0649|EPI_ISL_4496603|B.1.1.222|2020-11-04	Mexico	CMX-INER-IBT-0649	EPI_ISL_4496603	B.1.1.222	2020-11-04
USA|TX-HMH-MCoV-16685|EPI_ISL_1202395|B.1.1.222|2020-11-04	USA	TX-HMH-MCoV-16685	EPI_ISL_1202395	B.1.1.222	2020-11-04
Canada|ON-SC2233|EPI_ISL_1739607|AM.4|2020-11-05	Canada	ON-SC2233	EPI_ISL_1739607	AM.4	2020-11-05
USA|AZ-TG784828|EPI_ISL_1465087|B.1.1.222|2020-11-05	USA	AZ-TG784828	EPI_ISL_1465087	B.1.1.222	2020-11-05
USA|NM-DOH-2020491451|EPI_ISL_1113721|B.1.1.222|2020-11-05	USA	NM-DOH-2020491451	EPI_ISL_1113721	B.1.1.222	2020-11-05
USA|CA-CZB-26139|EPI_ISL_1477415|B.1.1.222|2020-11-05	USA	CA-CZB-26139	EPI_ISL_1477415	B.1.1.222	2020-11-05
USA|CA-CZB-26148|EPI_ISL_1477359|B.1.1.222|2020-11-05	USA	CA-CZB-26148	EPI_ISL_1477359	B.1.1.222	2020-11-05
USA|MI-UM-10036806044|EPI_ISL_728394|B.1.1.222|2020-11-05	USA	MI-UM-10036806044	EPI_ISL_728394	B.1.1.222	2020-11-05
USA|NM-DOH-2020496083|EPI_ISL_1113734|B.1.1.222|2020-11-05	USA	NM-DOH-2020496083	EPI_ISL_1113734	B.1.1.222	2020-11-05
USA|CO-CDPHE-2011121335|EPI_ISL_1233994|B.1.1.222|2020-11-05	USA	CO-CDPHE-2011121335	EPI_ISL_1233994	B.1.1.222	2020-11-05
USA|CO-CDPHE-2011121131|EPI_ISL_1233989|B.1.1.222|2020-11-05	USA	CO-CDPHE-2011121131	EPI_ISL_1233989	B.1.1.222	2020-11-05
USA|CO-CDPHE-2011121066|EPI_ISL_1233986|B.1.1.222|2020-11-05	USA	CO-CDPHE-2011121066	EPI_ISL_1233986	B.1.1.222	2020-11-05
USA|CO-CDPHE-2011121179|EPI_ISL_1233990|B.1.1.222|2020-11-05	USA	CO-CDPHE-2011121179	EPI_ISL_1233990	B.1.1.222	2020-11-05
USA|WY-WYPHL-20122056|EPI_ISL_2966526|B.1.1.222|2020-11-05	USA	WY-WYPHL-20122056	EPI_ISL_2966526	B.1.1.222	2020-11-05
USA|CO-CDPHE-2011121123|EPI_ISL_1540145|B.1.1.222|2020-11-05	USA	CO-CDPHE-2011121123	EPI_ISL_1540145	B.1.1.222	2020-11-05
USA|CO-CDPHE-2011121266|EPI_ISL_1233992|B.1.1.222|2020-11-05	USA	CO-CDPHE-2011121266	EPI_ISL_1233992	B.1.1.222	2020-11-05
USA|CO-CDPHE-2011121208|EPI_ISL_1233991|B.1.1.222|2020-11-05	USA	CO-CDPHE-2011121208	EPI_ISL_1233991	B.1.1.222	2020-11-05
USA|CO-CDPHE-2011120824|EPI_ISL_1233984|B.1.1.222|2020-11-05	USA	CO-CDPHE-2011120824	EPI_ISL_1233984	B.1.1.222	2020-11-05
USA|CO-CDPHE-2011121119|EPI_ISL_1233988|B.1.1.222|2020-11-05	USA	CO-CDPHE-2011121119	EPI_ISL_1233988	B.1.1.222	2020-11-05
USA|NM-DOH-2020492935|EPI_ISL_1113731|B.1.1.222|2020-11-05	USA	NM-DOH-2020492935	EPI_ISL_1113731	B.1.1.222	2020-11-05
USA|CO-CDPHE-2011121163|EPI_ISL_1540146|B.1.1.222|2020-11-05	USA	CO-CDPHE-2011121163	EPI_ISL_1540146	B.1.1.222	2020-11-05
USA|CO-CDPHE-2011121427|EPI_ISL_1233996|B.1.1.222|2020-11-05	USA	CO-CDPHE-2011121427	EPI_ISL_1233996	B.1.1.222	2020-11-05
Mexico|CMX-INER-IBT-0795|EPI_ISL_4888468|B.1.1.222|2020-11-06	Mexico	CMX-INER-IBT-0795	EPI_ISL_4888468	B.1.1.222	2020-11-06
USA|OR-OHSU-4516|EPI_ISL_2035678|B.1.1.222|2020-11-06	USA	OR-OHSU-4516	EPI_ISL_2035678	B.1.1.222	2020-11-06
Mexico|CMX-InDRE_229|EPI_ISL_933706|B.1.1.222|2020-11-06	Mexico	CMX-InDRE_229	EPI_ISL_933706	B.1.1.222	2020-11-06
USA|AZ-TG769880|EPI_ISL_1392569|B.1.1.222|2020-11-06	USA	AZ-TG769880	EPI_ISL_1392569	B.1.1.222	2020-11-06
USA|TX-HMH-MCoV-16747|EPI_ISL_1202457|B.1.1.222|2020-11-06	USA	TX-HMH-MCoV-16747	EPI_ISL_1202457	B.1.1.222	2020-11-06
USA|TX-HMH-MCoV-16759|EPI_ISL_1202469|B.1.1.222|2020-11-06	USA	TX-HMH-MCoV-16759	EPI_ISL_1202469	B.1.1.222	2020-11-06
USA|WY-WYPHL-20124514|EPI_ISL_3242830|B.1.1.222|2020-11-06	USA	WY-WYPHL-20124514	EPI_ISL_3242830	B.1.1.222	2020-11-06
USA|CA-ALSR-4669|EPI_ISL_667067|B.1.1.222|2020-11-06	USA	CA-ALSR-4669	EPI_ISL_667067	B.1.1.222	2020-11-06
USA|NMDOH-2020500031|EPI_ISL_1196441|B.1.1.222|2020-11-07	USA	NMDOH-2020500031	EPI_ISL_1196441	B.1.1.222	2020-11-07
USA|NMDOH-2020499641|EPI_ISL_1196439|B.1.1.222|2020-11-07	USA	NMDOH-2020499641	EPI_ISL_1196439	B.1.1.222	2020-11-07
Mexico|CMX-INER-IBT-0646|EPI_ISL_4496600|B.1.1.222|2020-11-07	Mexico	CMX-INER-IBT-0646	EPI_ISL_4496600	B.1.1.222	2020-11-07
USA|WI-UW-5086|EPI_ISL_2295159|B.1.1.222|2020-11-08	USA	WI-UW-5086	EPI_ISL_2295159	B.1.1.222	2020-11-08
Mexico|YUC-NYGC-57752-20|EPI_ISL_3023799|B.1.1.222|2020-11-08	Mexico	YUC-NYGC-57752-20	EPI_ISL_3023799	B.1.1.222	2020-11-08
Mexico|YUC-NYGC-57753-20|EPI_ISL_3023857|B.1.1.222|2020-11-08	Mexico	YUC-NYGC-57753-20	EPI_ISL_3023857	B.1.1.222	2020-11-08
USA|TX-HMH-MCoV-17355|EPI_ISL_1203066|B.1.1.222|2020-11-09	USA	TX-HMH-MCoV-17355	EPI_ISL_1203066	B.1.1.222	2020-11-09
USA|NY-NYCPHL-001267|EPI_ISL_683898|B.1.1.222|2020-11-09	USA	NY-NYCPHL-001267	EPI_ISL_683898	B.1.1.222	2020-11-09
Mexico|CMX-INER-IBT-0644|EPI_ISL_4496598|B.1.1.222|2020-11-09	Mexico	CMX-INER-IBT-0644	EPI_ISL_4496598	B.1.1.222	2020-11-09
Mexico|CMX-INMEGEN-03-10-48|EPI_ISL_4219712|B.1.1.222|2020-11-09	Mexico	CMX-INMEGEN-03-10-48	EPI_ISL_4219712	B.1.1.222	2020-11-09
Mexico|CMX-INMEGEN-01-01-02|EPI_ISL_1005657|B.1.1.222|2020-11-09	Mexico	CMX-INMEGEN-01-01-02	EPI_ISL_1005657	B.1.1.222	2020-11-09
Mexico|CMX-INER-IBT-0804|EPI_ISL_4888477|B.1.1.222|2020-11-09	Mexico	CMX-INER-IBT-0804	EPI_ISL_4888477	B.1.1.222	2020-11-09
Mexico|CMX-INER-IBT-0805|EPI_ISL_4888478|B.1.1.222|2020-11-09	Mexico	CMX-INER-IBT-0805	EPI_ISL_4888478	B.1.1.222	2020-11-09
USA|NM-UNM-02164|EPI_ISL_1664555|B.1.1.222|2020-11-09	USA	NM-UNM-02164	EPI_ISL_1664555	B.1.1.222	2020-11-09
Mexico|CMX-INMEGEN-03-10-15|EPI_ISL_4219693|B.1.1.222|2020-11-09	Mexico	CMX-INMEGEN-03-10-15	EPI_ISL_4219693	B.1.1.222	2020-11-09
USA|NM-DOH-2020505012|EPI_ISL_1113747|B.1.1.222|2020-11-09	USA	NM-DOH-2020505012	EPI_ISL_1113747	B.1.1.222	2020-11-09
USA|CO-CDPHE-2011101488|EPI_ISL_3403758|B.1.1.222|2020-11-09	USA	CO-CDPHE-2011101488	EPI_ISL_3403758	B.1.1.222	2020-11-09
USA|WY-WYPHL20126984|EPI_ISL_1969746|B.1.1.222|2020-11-09	USA	WY-WYPHL20126984	EPI_ISL_1969746	B.1.1.222	2020-11-09
USA|NM-UNM-02159|EPI_ISL_1664551|B.1.1.222|2020-11-09	USA	NM-UNM-02159	EPI_ISL_1664551	B.1.1.222	2020-11-09
USA|CO-CDPHE-2011135012|EPI_ISL_5987220|B.1.1.222|2020-11-09	USA	CO-CDPHE-2011135012	EPI_ISL_5987220	B.1.1.222	2020-11-09
USA|AL-HGSC-JEQD|EPI_ISL_877251|B.1.1.222|2020-11-10	USA	AL-HGSC-JEQD	EPI_ISL_877251	B.1.1.222	2020-11-10
Mexico|CMX-INER-IBT-0652|EPI_ISL_4496606|B.1.1.222|2020-11-10	Mexico	CMX-INER-IBT-0652	EPI_ISL_4496606	B.1.1.222	2020-11-10
USA|NY-CUIMC-NP-3406|EPI_ISL_2500553|B.1.1.222|2020-11-10	USA	NY-CUIMC-NP-3406	EPI_ISL_2500553	B.1.1.222	2020-11-10
Mexico|CMX-INER-IBT-0798|EPI_ISL_4888471|B.1.1.222|2020-11-10	Mexico	CMX-INER-IBT-0798	EPI_ISL_4888471	B.1.1.222	2020-11-10
Mexico|CMX-INMEGEN-01-01-03|EPI_ISL_1005658|B.1.1.222|2020-11-10	Mexico	CMX-INMEGEN-01-01-03	EPI_ISL_1005658	B.1.1.222	2020-11-10
USA|OR-OHSU-4686|EPI_ISL_4494093|B.1.1.222|2020-11-10	USA	OR-OHSU-4686	EPI_ISL_4494093	B.1.1.222	2020-11-10
Mexico|CMX-INER-IBT-0793|EPI_ISL_4888466|B.1.1.222|2020-11-10	Mexico	CMX-INER-IBT-0793	EPI_ISL_4888466	B.1.1.222	2020-11-10
USA|IL-NM-3099|EPI_ISL_936610|B.1.1.222|2020-11-10	USA	IL-NM-3099	EPI_ISL_936610	B.1.1.222	2020-11-10
Mexico|CMX-INER-IBT-0645|EPI_ISL_4496599|B.1.1.222|2020-11-10	Mexico	CMX-INER-IBT-0645	EPI_ISL_4496599	B.1.1.222	2020-11-10
USA|TN-CDC-4041728-001|EPI_ISL_1711073|B.1.1.222|2020-11-10	USA	TN-CDC-4041728-001	EPI_ISL_1711073	B.1.1.222	2020-11-10
USA|NJ-NYULH261|EPI_ISL_1060673|B.1.1.222|2020-11-10	USA	NJ-NYULH261	EPI_ISL_1060673	B.1.1.222	2020-11-10
USA|CA-ALSR-4677|EPI_ISL_667073|B.1.1.222|2020-11-10	USA	CA-ALSR-4677	EPI_ISL_667073	B.1.1.222	2020-11-10
USA|NM-UNM-02156|EPI_ISL_1664546|B.1.1.222|2020-11-10	USA	NM-UNM-02156	EPI_ISL_1664546	B.1.1.222	2020-11-10
USA|WY-WYPHL-20129906|EPI_ISL_2647766|B.1.1.222|2020-11-10	USA	WY-WYPHL-20129906	EPI_ISL_2647766	B.1.1.222	2020-11-10
USA|CO-CDPHE-2011152235|EPI_ISL_5987225|B.1.1.222|2020-11-10	USA	CO-CDPHE-2011152235	EPI_ISL_5987225	B.1.1.222	2020-11-10
France|ARA-104848|EPI_ISL_730649|B.1.160.18|2020-11-10	France	ARA-104848	EPI_ISL_730649	B.1.160.18	2020-11-10
USA|NY-NYCPHL-001318|EPI_ISL_683880|B.1.603|2020-11-10	USA	NY-NYCPHL-001318	EPI_ISL_683880	B.1.603	2020-11-10
USA|AL-HGSC-JERZ|EPI_ISL_877292|B.1.1.222|2020-11-11	USA	AL-HGSC-JERZ	EPI_ISL_877292	B.1.1.222	2020-11-11
USA|AZ-TG761540|EPI_ISL_1296734|B.1.1.222|2020-11-11	USA	AZ-TG761540	EPI_ISL_1296734	B.1.1.222	2020-11-11
USA|TX-HMH-MCoV-17522|EPI_ISL_1203233|B.1.1.222|2020-11-11	USA	TX-HMH-MCoV-17522	EPI_ISL_1203233	B.1.1.222	2020-11-11
USA|WY-WYPHL-20131157|EPI_ISL_2728057|B.1.1.222|2020-11-11	USA	WY-WYPHL-20131157	EPI_ISL_2728057	B.1.1.222	2020-11-11
USA|IL-LCH-0218|EPI_ISL_1501841|B.1.1.222|2020-11-11	USA	IL-LCH-0218	EPI_ISL_1501841	B.1.1.222	2020-11-11
USA|CA-CZB-14547|EPI_ISL_739010|B.1.1.222|2020-11-11	USA	CA-CZB-14547	EPI_ISL_739010	B.1.1.222	2020-11-11
USA|CA-CDPH-1002004747|EPI_ISL_5934639|B.1.1.222|2020-11-11	USA	CA-CDPH-1002004747	EPI_ISL_5934639	B.1.1.222	2020-11-11
USA|CO-CDPHE-2011165571|EPI_ISL_5987227|B.1.1.222|2020-11-11	USA	CO-CDPHE-2011165571	EPI_ISL_5987227	B.1.1.222	2020-11-11
Mexico|CMX-INER-IBT-0796|EPI_ISL_4888469|B.1.1.222|2020-11-11	Mexico	CMX-INER-IBT-0796	EPI_ISL_4888469	B.1.1.222	2020-11-11
Mexico|CMX-INER-IBT-0650|EPI_ISL_4496604|B.1.1.222|2020-11-12	Mexico	CMX-INER-IBT-0650	EPI_ISL_4496604	B.1.1.222	2020-11-12
Mexico|CMX-INER-IBT-0657|EPI_ISL_4496611|B.1.1.222|2020-11-12	Mexico	CMX-INER-IBT-0657	EPI_ISL_4496611	B.1.1.222	2020-11-12
Mexico|CMX-INER-IBT-0506|EPI_ISL_3758056|B.1.1.222|2020-11-12	Mexico	CMX-INER-IBT-0506	EPI_ISL_3758056	B.1.1.222	2020-11-12
USA|CO-CDPHE-2011121157|EPI_ISL_1169703|B.1.1.222|2020-11-12	USA	CO-CDPHE-2011121157	EPI_ISL_1169703	B.1.1.222	2020-11-12
USA|CO-CDPHE-2011121364|EPI_ISL_1169704|B.1.1.222|2020-11-12	USA	CO-CDPHE-2011121364	EPI_ISL_1169704	B.1.1.222	2020-11-12
USA|CO-CDPHE-2011120894|EPI_ISL_1169702|B.1.1.222|2020-11-12	USA	CO-CDPHE-2011120894	EPI_ISL_1169702	B.1.1.222	2020-11-12
USA|CO-CDPHE-2011120805|EPI_ISL_1169701|B.1.1.222|2020-11-12	USA	CO-CDPHE-2011120805	EPI_ISL_1169701	B.1.1.222	2020-11-12
Mexico|CMX-INER-IBT-0656|EPI_ISL_4496610|B.1.1.222|2020-11-12	Mexico	CMX-INER-IBT-0656	EPI_ISL_4496610	B.1.1.222	2020-11-12
Mexico|CMX-INCMNSZ_COV121371|EPI_ISL_1502816|B.1.1.222|2020-11-13	Mexico	CMX-INCMNSZ_COV121371	EPI_ISL_1502816	B.1.1.222	2020-11-13
USA|FL-BPHL-2633|EPI_ISL_848812|B.1.1.222|2020-11-13	USA	FL-BPHL-2633	EPI_ISL_848812	B.1.1.222	2020-11-13
USA|OR-OHSU-5322|EPI_ISL_2080791|B.1.1.222|2020-11-13	USA	OR-OHSU-5322	EPI_ISL_2080791	B.1.1.222	2020-11-13
USA|OR-OHSU-5330|EPI_ISL_2080793|B.1.1.222|2020-11-13	USA	OR-OHSU-5330	EPI_ISL_2080793	B.1.1.222	2020-11-13
USA|OR-OHSU-5327|EPI_ISL_832767|B.1.1.222|2020-11-13	USA	OR-OHSU-5327	EPI_ISL_832767	B.1.1.222	2020-11-13
USA|OR-OHSU-5334|EPI_ISL_2080795|B.1.1.222|2020-11-13	USA	OR-OHSU-5334	EPI_ISL_2080795	B.1.1.222	2020-11-13
USA|OR-OHSU-5333|EPI_ISL_4494111|B.1.1.222|2020-11-13	USA	OR-OHSU-5333	EPI_ISL_4494111	B.1.1.222	2020-11-13
USA|OR-OHSU-5332|EPI_ISL_832768|B.1.1.222|2020-11-13	USA	OR-OHSU-5332	EPI_ISL_832768	B.1.1.222	2020-11-13
USA|WA-S4682|EPI_ISL_1049530|B.1.1.222|2020-11-13	USA	WA-S4682	EPI_ISL_1049530	B.1.1.222	2020-11-13
Mexico|CMX-INMEGEN-03-10-92|EPI_ISL_4220129|B.1.1.222|2020-11-13	Mexico	CMX-INMEGEN-03-10-92	EPI_ISL_4220129	B.1.1.222	2020-11-13
USA|un-SEARCH-17638|EPI_ISL_1811821|B.1.1.222|2020-11-13	USA	un-SEARCH-17638	EPI_ISL_1811821	B.1.1.222	2020-11-13
USA|CA-CZB-27861|EPI_ISL_1477887|B.1.1.222|2020-11-13	USA	CA-CZB-27861	EPI_ISL_1477887	B.1.1.222	2020-11-13
USA|CA-CZB-27859|EPI_ISL_1477801|B.1.1.222|2020-11-13	USA	CA-CZB-27859	EPI_ISL_1477801	B.1.1.222	2020-11-13
USA|CO-CDPHE-2011139291|EPI_ISL_1234001|B.1.1.222|2020-11-13	USA	CO-CDPHE-2011139291	EPI_ISL_1234001	B.1.1.222	2020-11-13
USA|CO-CDPHE-2011140411|EPI_ISL_1234006|B.1.1.222|2020-11-13	USA	CO-CDPHE-2011140411	EPI_ISL_1234006	B.1.1.222	2020-11-13
USA|CO-CDPHE-2011139143|EPI_ISL_1169706|B.1.1.222|2020-11-13	USA	CO-CDPHE-2011139143	EPI_ISL_1169706	B.1.1.222	2020-11-13
USA|CO-CDPHE-2011139197|EPI_ISL_1169707|B.1.1.222|2020-11-13	USA	CO-CDPHE-2011139197	EPI_ISL_1169707	B.1.1.222	2020-11-13
USA|CO-CDPHE-2011139233|EPI_ISL_1234000|B.1.1.222|2020-11-13	USA	CO-CDPHE-2011139233	EPI_ISL_1234000	B.1.1.222	2020-11-13
USA|CO-CDPHE-2011139107|EPI_ISL_1233999|B.1.1.222|2020-11-13	USA	CO-CDPHE-2011139107	EPI_ISL_1233999	B.1.1.222	2020-11-13
USA|CO-CDPHE-2011139334|EPI_ISL_1540148|B.1.1.222|2020-11-13	USA	CO-CDPHE-2011139334	EPI_ISL_1540148	B.1.1.222	2020-11-13
USA|CO-CDPHE-2011139112|EPI_ISL_1169705|B.1.1.222|2020-11-13	USA	CO-CDPHE-2011139112	EPI_ISL_1169705	B.1.1.222	2020-11-13
USA|CO-CDPHE-2011139401|EPI_ISL_1169710|B.1.1.222|2020-11-13	USA	CO-CDPHE-2011139401	EPI_ISL_1169710	B.1.1.222	2020-11-13
USA|CO-CDPHE-2011140331|EPI_ISL_1169712|B.1.1.222|2020-11-13	USA	CO-CDPHE-2011140331	EPI_ISL_1169712	B.1.1.222	2020-11-13
USA|CO-CDPHE-2011139382|EPI_ISL_1540149|B.1.1.222|2020-11-13	USA	CO-CDPHE-2011139382	EPI_ISL_1540149	B.1.1.222	2020-11-13
USA|CO-CDPHE-2011140310|EPI_ISL_1540150|B.1.1.222|2020-11-13	USA	CO-CDPHE-2011140310	EPI_ISL_1540150	B.1.1.222	2020-11-13
USA|CO-CDPHE-2011139303|EPI_ISL_1169709|B.1.1.222|2020-11-13	USA	CO-CDPHE-2011139303	EPI_ISL_1169709	B.1.1.222	2020-11-13
USA|CO-CDPHE-2011140320|EPI_ISL_1234004|B.1.1.222|2020-11-13	USA	CO-CDPHE-2011140320	EPI_ISL_1234004	B.1.1.222	2020-11-13
USA|CO-CDPHE-2011140304|EPI_ISL_1169711|B.1.1.222|2020-11-13	USA	CO-CDPHE-2011140304	EPI_ISL_1169711	B.1.1.222	2020-11-13
USA|CO-CDPHE-2011139296|EPI_ISL_1169708|B.1.1.222|2020-11-13	USA	CO-CDPHE-2011139296	EPI_ISL_1169708	B.1.1.222	2020-11-13
USA|CO-CDPHE-2011140342|EPI_ISL_1234005|B.1.1.222|2020-11-13	USA	CO-CDPHE-2011140342	EPI_ISL_1234005	B.1.1.222	2020-11-13
USA|OH-ODH-SC0158341|EPI_ISL_2557308|B.1.1.222|2020-11-13	USA	OH-ODH-SC0158341	EPI_ISL_2557308	B.1.1.222	2020-11-13
USA|TX-HMH-MCoV-17739|EPI_ISL_1203450|B.1.1.222|2020-11-14	USA	TX-HMH-MCoV-17739	EPI_ISL_1203450	B.1.1.222	2020-11-14
USA|TX-HMH-MCoV-17740|EPI_ISL_1203451|B.1.1.222|2020-11-14	USA	TX-HMH-MCoV-17740	EPI_ISL_1203451	B.1.1.222	2020-11-14
USA|TX-HMH-MCoV-17730|EPI_ISL_1203441|B.1.1.222|2020-11-14	USA	TX-HMH-MCoV-17730	EPI_ISL_1203441	B.1.1.222	2020-11-14
USA|TX-HMH-MCoV-18204|EPI_ISL_784552|B.1.1.222|2020-11-14	USA	TX-HMH-MCoV-18204	EPI_ISL_784552	B.1.1.222	2020-11-14
USA|NY-PRL-2021_0701_51J24|EPI_ISL_2827533|B.1.1.222|2020-11-14	USA	NY-PRL-2021_0701_51J24	EPI_ISL_2827533	B.1.1.222	2020-11-14
USA|NY-MSHSPSP-PV24369|EPI_ISL_1708763|B.1.1.222|2020-11-15	USA	NY-MSHSPSP-PV24369	EPI_ISL_1708763	B.1.1.222	2020-11-15
USA|TX-HMH-MCoV-17718|EPI_ISL_1203429|B.1.1.222|2020-11-15	USA	TX-HMH-MCoV-17718	EPI_ISL_1203429	B.1.1.222	2020-11-15
USA|TX-HMH-MCoV-17683|EPI_ISL_1203394|B.1.1.222|2020-11-15	USA	TX-HMH-MCoV-17683	EPI_ISL_1203394	B.1.1.222	2020-11-15
USA|AZ-CDC-3923789-001|EPI_ISL_893735|B.1.1.222|2020-11-15	USA	AZ-CDC-3923789-001	EPI_ISL_893735	B.1.1.222	2020-11-15
USA|NY-PRL-2021_0701_52P22|EPI_ISL_2827720|B.1.1.222|2020-11-16	USA	NY-PRL-2021_0701_52P22	EPI_ISL_2827720	B.1.1.222	2020-11-16
Mexico|CMX-INER-IBT-0678|EPI_ISL_4496632|B.1.1.222|2020-11-16	Mexico	CMX-INER-IBT-0678	EPI_ISL_4496632	B.1.1.222	2020-11-16
Mexico|SLP-InDRE_130|EPI_ISL_913933|B.1.1.222|2020-11-17	Mexico	SLP-InDRE_130	EPI_ISL_913933	B.1.1.222	2020-11-17
USA|CA-CZB-25095|EPI_ISL_1235339|B.1.1.222|2020-11-17	USA	CA-CZB-25095	EPI_ISL_1235339	B.1.1.222	2020-11-17
USA|CA-CZB-25096|EPI_ISL_1235147|B.1.1.222|2020-11-17	USA	CA-CZB-25096	EPI_ISL_1235147	B.1.1.222	2020-11-17
USA|TX-HMH-MCoV-34619|EPI_ISL_2215459|B.1.1.222|2020-11-17	USA	TX-HMH-MCoV-34619	EPI_ISL_2215459	B.1.1.222	2020-11-17
USA|AZ-ASPHL-2879|EPI_ISL_933546|B.1.1.222|2020-11-17	USA	AZ-ASPHL-2879	EPI_ISL_933546	B.1.1.222	2020-11-17
Mexico|CMX-INER-IBT-0666|EPI_ISL_4496620|B.1.1.222|2020-11-17	Mexico	CMX-INER-IBT-0666	EPI_ISL_4496620	B.1.1.222	2020-11-17
USA|CO-CDPHE-2011200641|EPI_ISL_771261|B.1.1.222|2020-11-17	USA	CO-CDPHE-2011200641	EPI_ISL_771261	B.1.1.222	2020-11-17
USA|CO-CDPHE-2011200477|EPI_ISL_771257|B.1.1.222|2020-11-17	USA	CO-CDPHE-2011200477	EPI_ISL_771257	B.1.1.222	2020-11-17
USA|CA-CHLA-PLM07772123|EPI_ISL_753364|B.1.1.222|2020-11-17	USA	CA-CHLA-PLM07772123	EPI_ISL_753364	B.1.1.222	2020-11-17
USA|TX-HMH-MCoV-18472|EPI_ISL_784820|B.1.1.222|2020-11-18	USA	TX-HMH-MCoV-18472	EPI_ISL_784820	B.1.1.222	2020-11-18
Mexico|CMX-INMEGEN-01-01-07|EPI_ISL_1005660|B.1.1.222|2020-11-18	Mexico	CMX-INMEGEN-01-01-07	EPI_ISL_1005660	B.1.1.222	2020-11-18
USA|CA-CZB-25146|EPI_ISL_1235122|B.1.1.222|2020-11-18	USA	CA-CZB-25146	EPI_ISL_1235122	B.1.1.222	2020-11-18
USA|CA-CZB-25145|EPI_ISL_1235281|B.1.1.222|2020-11-18	USA	CA-CZB-25145	EPI_ISL_1235281	B.1.1.222	2020-11-18
Mexico|CMX-INMEGEN-12-03-09|EPI_ISL_955200|B.1.1.222|2020-11-18	Mexico	CMX-INMEGEN-12-03-09	EPI_ISL_955200	B.1.1.222	2020-11-18
Mexico|CMX-INMEGEN-12-03-15|EPI_ISL_955205|B.1.1.222|2020-11-18	Mexico	CMX-INMEGEN-12-03-15	EPI_ISL_955205	B.1.1.222	2020-11-18
USA|MI-UM-10037010090|EPI_ISL_1132980|B.1.1.222|2020-11-18	USA	MI-UM-10037010090	EPI_ISL_1132980	B.1.1.222	2020-11-18
USA|AZ-ASPHL-2870|EPI_ISL_1196399|B.1.1.222|2020-11-18	USA	AZ-ASPHL-2870	EPI_ISL_1196399	B.1.1.222	2020-11-18
USA|CA-SEARCH-102207|EPI_ISL_2628603|B.1.1.222|2020-11-18	USA	CA-SEARCH-102207	EPI_ISL_2628603	B.1.1.222	2020-11-18
USA|CA-CZB-14957|EPI_ISL_739026|B.1.1.222|2020-11-18	USA	CA-CZB-14957	EPI_ISL_739026	B.1.1.222	2020-11-18
USA|CA-CZB-15001|EPI_ISL_738780|B.1.1.222|2020-11-18	USA	CA-CZB-15001	EPI_ISL_738780	B.1.1.222	2020-11-18
USA|CA-CZB-15000|EPI_ISL_739103|B.1.1.222|2020-11-18	USA	CA-CZB-15000	EPI_ISL_739103	B.1.1.222	2020-11-18
USA|CA-CZB-15002|EPI_ISL_739409|B.1.1.222|2020-11-18	USA	CA-CZB-15002	EPI_ISL_739409	B.1.1.222	2020-11-18
USA|CA-CZB-14970|EPI_ISL_739074|B.1.1.222|2020-11-18	USA	CA-CZB-14970	EPI_ISL_739074	B.1.1.222	2020-11-18
USA|CA-CZB-14977|EPI_ISL_739147|B.1.1.222|2020-11-18	USA	CA-CZB-14977	EPI_ISL_739147	B.1.1.222	2020-11-18
Mexico|CMX-INER-IBT-0661|EPI_ISL_4496615|B.1.1.222|2020-11-18	Mexico	CMX-INER-IBT-0661	EPI_ISL_4496615	B.1.1.222	2020-11-18
USA|FL-BPHL-2928|EPI_ISL_935449|B.1.1.222|2020-11-18	USA	FL-BPHL-2928	EPI_ISL_935449	B.1.1.222	2020-11-18
USA|TX-HMH-MCoV-18330|EPI_ISL_784678|B.1.1.222|2020-11-18	USA	TX-HMH-MCoV-18330	EPI_ISL_784678	B.1.1.222	2020-11-18
USA|TX-HMH-MCoV-19708|EPI_ISL_784060|B.1.1.222|2020-11-18	USA	TX-HMH-MCoV-19708	EPI_ISL_784060	B.1.1.222	2020-11-18
USA|TX-HMH-MCoV-18332|EPI_ISL_784680|B.1.1.222|2020-11-18	USA	TX-HMH-MCoV-18332	EPI_ISL_784680	B.1.1.222	2020-11-18
USA|CA-CZB-14995|EPI_ISL_738771|B.1.1.222|2020-11-18	USA	CA-CZB-14995	EPI_ISL_738771	B.1.1.222	2020-11-18
USA|CO-CDPHE-2011233599|EPI_ISL_771279|B.1.1.222|2020-11-18	USA	CO-CDPHE-2011233599	EPI_ISL_771279	B.1.1.222	2020-11-18
USA|CO-CDPHE-2011193717|EPI_ISL_771252|B.1.1.222|2020-11-18	USA	CO-CDPHE-2011193717	EPI_ISL_771252	B.1.1.222	2020-11-18
USA|CO-CDPHE-2011197332|EPI_ISL_771253|B.1.1.222|2020-11-18	USA	CO-CDPHE-2011197332	EPI_ISL_771253	B.1.1.222	2020-11-18
USA|WY-WPHL-20141700|EPI_ISL_2246803|B.1.1.222|2020-11-18	USA	WY-WPHL-20141700	EPI_ISL_2246803	B.1.1.222	2020-11-18
USA|CO-CDPHE-2011197416|EPI_ISL_771254|B.1.1.222|2020-11-18	USA	CO-CDPHE-2011197416	EPI_ISL_771254	B.1.1.222	2020-11-18
England|MILK-BAB136|EPI_ISL_783074|B.1.531|2020-11-18	England	MILK-BAB136	EPI_ISL_783074	B.1.531	2020-11-18
England|QEUH-BA2B40|EPI_ISL_73831|B.1.553|2020-11-18	England	QEUH-BA2B40	EPI_ISL_73831	B.1.553	2020-11-18
USA|TX-HMH-MCoV-34564|EPI_ISL_2215298|B.1.1.222|2020-11-19	USA	TX-HMH-MCoV-34564	EPI_ISL_2215298	B.1.1.222	2020-11-19
Mexico|CMX-INMEGEN-12-03-08|EPI_ISL_955199|B.1.1.222|2020-11-19	Mexico	CMX-INMEGEN-12-03-08	EPI_ISL_955199	B.1.1.222	2020-11-19
USA|CO-CDPHE-2100023395|EPI_ISL_771331|B.1.1.222|2020-11-19	USA	CO-CDPHE-2100023395	EPI_ISL_771331	B.1.1.222	2020-11-19
USA|CO-CDPHE-2100023473|EPI_ISL_771332|B.1.1.222|2020-11-19	USA	CO-CDPHE-2100023473	EPI_ISL_771332	B.1.1.222	2020-11-19
USA|CO-CDPHE-2100010210|EPI_ISL_771293|B.1.1.222|2020-11-19	USA	CO-CDPHE-2100010210	EPI_ISL_771293	B.1.1.222	2020-11-19
USA|CO-CDPHE-2100010220|EPI_ISL_771294|B.1.1.222|2020-11-19	USA	CO-CDPHE-2100010220	EPI_ISL_771294	B.1.1.222	2020-11-19
Mexico|CMX-INMEGEN-12-03-02|EPI_ISL_955195|B.1.1.222|2020-11-19	Mexico	CMX-INMEGEN-12-03-02	EPI_ISL_955195	B.1.1.222	2020-11-19
Mexico|CMX-INER-IBT-0675|EPI_ISL_4496629|B.1.1.222|2020-11-19	Mexico	CMX-INER-IBT-0675	EPI_ISL_4496629	B.1.1.222	2020-11-19
Mexico|YUC-NYGC-60663-20|EPI_ISL_3023798|B.1.1.222|2020-11-19	Mexico	YUC-NYGC-60663-20	EPI_ISL_3023798	B.1.1.222	2020-11-19
USA|CA-CDPH-1002004794|EPI_ISL_5934686|B.1.1.222|2020-11-19	USA	CA-CDPH-1002004794	EPI_ISL_5934686	B.1.1.222	2020-11-19
USA|CO-CDPHE-2011199660|EPI_ISL_1234008|B.1.1.222|2020-11-19	USA	CO-CDPHE-2011199660	EPI_ISL_1234008	B.1.1.222	2020-11-19
USA|WY-WYPHL-20143402|EPI_ISL_2566089|B.1.1.222|2020-11-19	USA	WY-WYPHL-20143402	EPI_ISL_2566089	B.1.1.222	2020-11-19
USA|CO-CDPHE-2011200689|EPI_ISL_1234009|B.1.1.222|2020-11-19	USA	CO-CDPHE-2011200689	EPI_ISL_1234009	B.1.1.222	2020-11-19
USA|CO-CDPHE-2011200553|EPI_ISL_771260|B.1.1.222|2020-11-19	USA	CO-CDPHE-2011200553	EPI_ISL_771260	B.1.1.222	2020-11-19
USA|CO-CDPHE-2011201743|EPI_ISL_1616898|B.1.1.222|2020-11-19	USA	CO-CDPHE-2011201743	EPI_ISL_1616898	B.1.1.222	2020-11-19
USA|CO-CDPHE-2011199375|EPI_ISL_771255|B.1.1.222|2020-11-19	USA	CO-CDPHE-2011199375	EPI_ISL_771255	B.1.1.222	2020-11-19
USA|CO-CDPHE-2011200819|EPI_ISL_1234010|B.1.1.222|2020-11-19	USA	CO-CDPHE-2011200819	EPI_ISL_1234010	B.1.1.222	2020-11-19
Taiwan|NTU33|EPI_ISL_693304|B.1.1.222|2020-11-20	Taiwan	NTU33	EPI_ISL_693304	B.1.1.222	2020-11-20
USA|CO-CDPHE-2100015131|EPI_ISL_771311|B.1.1.222|2020-11-20	USA	CO-CDPHE-2100015131	EPI_ISL_771311	B.1.1.222	2020-11-20
Mexico|CMX-INMEGEN-11-06|EPI_ISL_933516|B.1.1.222|2020-11-20	Mexico	CMX-INMEGEN-11-06	EPI_ISL_933516	B.1.1.222	2020-11-20
Mexico|CMX-INMEGEN-11-08|EPI_ISL_933518|B.1.1.222|2020-11-20	Mexico	CMX-INMEGEN-11-08	EPI_ISL_933518	B.1.1.222	2020-11-20
Mexico|SEARCH-100333|EPI_ISL_2231337|B.1.1.222|2020-11-20	Mexico	SEARCH-100333	EPI_ISL_2231337	B.1.1.222	2020-11-20
Mexico|CMX-INMEGEN-12-03-12|EPI_ISL_955193|B.1.1.222|2020-11-20	Mexico	CMX-INMEGEN-12-03-12	EPI_ISL_955193	B.1.1.222	2020-11-20
USA|CO-CDPHE-2100016535|EPI_ISL_771324|B.1.1.222|2020-11-20	USA	CO-CDPHE-2100016535	EPI_ISL_771324	B.1.1.222	2020-11-20
USA|WY-WYPHL-20146080|EPI_ISL_2594411|B.1.1.222|2020-11-20	USA	WY-WYPHL-20146080	EPI_ISL_2594411	B.1.1.222	2020-11-20
USA|CO-CDPHE-2100016689|EPI_ISL_771326|B.1.1.222|2020-11-20	USA	CO-CDPHE-2100016689	EPI_ISL_771326	B.1.1.222	2020-11-20
USA|CA-CZB-15095|EPI_ISL_738534|B.1.1.450|2020-11-20	USA	CA-CZB-15095	EPI_ISL_738534	B.1.1.450	2020-11-20
Mexico|MIC-InDRE_191|EPI_ISL_933668|B.1.1.222|2020-11-21	Mexico	MIC-InDRE_191	EPI_ISL_933668	B.1.1.222	2020-11-21
USA|NY-Wadsworth-21019470-01|EPI_ISL_1398207|B.1.1.222|2020-11-21	USA	NY-Wadsworth-21019470-01	EPI_ISL_1398207	B.1.1.222	2020-11-21
USA|CO-CDPHE-2100015096|EPI_ISL_771310|B.1.1.222|2020-11-21	USA	CO-CDPHE-2100015096	EPI_ISL_771310	B.1.1.222	2020-11-21
USA|CO-CDPHE-2100014869|EPI_ISL_771308|B.1.1.222|2020-11-21	USA	CO-CDPHE-2100014869	EPI_ISL_771308	B.1.1.222	2020-11-21
USA|CO-CDPHE-2100015371|EPI_ISL_771313|B.1.1.222|2020-11-21	USA	CO-CDPHE-2100015371	EPI_ISL_771313	B.1.1.222	2020-11-21
USA|TX-HMH-MCoV-34606|EPI_ISL_2215415|B.1.1.222|2020-11-22	USA	TX-HMH-MCoV-34606	EPI_ISL_2215415	B.1.1.222	2020-11-22
Mexico|YUC-NYGC-61464-20|EPI_ISL_3023855|B.1.1.222|2020-11-22	Mexico	YUC-NYGC-61464-20	EPI_ISL_3023855	B.1.1.222	2020-11-22
USA|TX-HMH-MCoV-18649|EPI_ISL_784997|B.1.1.222|2020-11-23	USA	TX-HMH-MCoV-18649	EPI_ISL_784997	B.1.1.222	2020-11-23
USA|CA-CZB-15996|EPI_ISL_850026|B.1.1.222|2020-11-23	USA	CA-CZB-15996	EPI_ISL_850026	B.1.1.222	2020-11-23
USA|CO-CDPHE-2100023678|EPI_ISL_771333|B.1.1.222|2020-11-23	USA	CO-CDPHE-2100023678	EPI_ISL_771333	B.1.1.222	2020-11-23
Mexico|CMX-INMEGEN-12-04-11|EPI_ISL_1005569|B.1.1.222|2020-11-23	Mexico	CMX-INMEGEN-12-04-11	EPI_ISL_1005569	B.1.1.222	2020-11-23
USA|TX-HMH-MCoV-19122|EPI_ISL_783639|B.1.1.222|2020-11-23	USA	TX-HMH-MCoV-19122	EPI_ISL_783639	B.1.1.222	2020-11-23
USA|TX-HMH-MCoV-18734|EPI_ISL_785078|B.1.1.222|2020-11-23	USA	TX-HMH-MCoV-18734	EPI_ISL_785078	B.1.1.222	2020-11-23
USA|CA-CZB-15158|EPI_ISL_739138|B.1.1.222|2020-11-23	USA	CA-CZB-15158	EPI_ISL_739138	B.1.1.222	2020-11-23
Mexico|SEARCH-100338|EPI_ISL_2231152|B.1.1.222|2020-11-23	Mexico	SEARCH-100338	EPI_ISL_2231152	B.1.1.222	2020-11-23
USA|CA-ALSR-5764|EPI_ISL_878423|B.1.1.222|2020-11-23	USA	CA-ALSR-5764	EPI_ISL_878423	B.1.1.222	2020-11-23
USA|CO-CDPHE-2100007082|EPI_ISL_1169715|B.1.1.222|2020-11-23	USA	CO-CDPHE-2100007082	EPI_ISL_1169715	B.1.1.222	2020-11-23
USA|CO-CDPHE-2100007078|EPI_ISL_1169714|B.1.1.222|2020-11-23	USA	CO-CDPHE-2100007078	EPI_ISL_1169714	B.1.1.222	2020-11-23
Mexico|CMX-INER-IBT-0674|EPI_ISL_4496628|B.1.1.222|2020-11-23	Mexico	CMX-INER-IBT-0674	EPI_ISL_4496628	B.1.1.222	2020-11-23
Mexico|CMX-INER-IBT-0663|EPI_ISL_4496617|B.1.1.222|2020-11-23	Mexico	CMX-INER-IBT-0663	EPI_ISL_4496617	B.1.1.222	2020-11-23
Mexico|CMX-INER-IBT-0676|EPI_ISL_4496630|B.1.1.222|2020-11-23	Mexico	CMX-INER-IBT-0676	EPI_ISL_4496630	B.1.1.222	2020-11-23
Denmark|DCGC-20308|EPI_ISL_748106|B.1.258.15|2020-11-23	Denmark	DCGC-20308	EPI_ISL_748106	B.1.258.15	2020-11-23
Denmark|DCGC-14599|EPI_ISL_711361|B.1.258.19|2020-11-23	Denmark	DCGC-14599	EPI_ISL_711361	B.1.258.19	2020-11-23
USA|NY-NYCPHL-001443|EPI_ISL_683762|B.1.526|2020-11-23	USA	NY-NYCPHL-001443	EPI_ISL_683762	B.1.526	2020-11-23
USA|CA-ALSR-6006|EPI_ISL_879961|B.1.1.222|2020-11-24	USA	CA-ALSR-6006	EPI_ISL_879961	B.1.1.222	2020-11-24
USA|CA-CZB-16024|EPI_ISL_850054|B.1.1.222|2020-11-24	USA	CA-CZB-16024	EPI_ISL_850054	B.1.1.222	2020-11-24
USA|TX-HMH-MCoV-19825|EPI_ISL_784153|B.1.1.222|2020-11-24	USA	TX-HMH-MCoV-19825	EPI_ISL_784153	B.1.1.222	2020-11-24
Mexico|HID-21-053-007-41160|EPI_ISL_2795658|B.1.1.222|2020-11-24	Mexico	HID-21-053-007-41160	EPI_ISL_2795658	B.1.1.222	2020-11-24
USA|CA-UCSC-815|EPI_ISL_2179225|B.1.1.222|2020-11-24	USA	CA-UCSC-815	EPI_ISL_2179225	B.1.1.222	2020-11-24
USA|CA-SEARCH-16190|EPI_ISL_1813093|B.1.1.222|2020-11-24	USA	CA-SEARCH-16190	EPI_ISL_1813093	B.1.1.222	2020-11-24
USA|OR-OHSU-5803|EPI_ISL_861930|B.1.1.222|2020-11-24	USA	OR-OHSU-5803	EPI_ISL_861930	B.1.1.222	2020-11-24
USA|CO-CDPHE-2100036095|EPI_ISL_771340|B.1.1.222|2020-11-24	USA	CO-CDPHE-2100036095	EPI_ISL_771340	B.1.1.222	2020-11-24
Mexico|CMX-INER-IBT-0664|EPI_ISL_4496618|B.1.1.222|2020-11-24	Mexico	CMX-INER-IBT-0664	EPI_ISL_4496618	B.1.1.222	2020-11-24
Luxembourg|LNS9084900|EPI_ISL_744845|B.1.160.21|2020-11-24	Luxembourg	LNS9084900	EPI_ISL_744845	B.1.160.21	2020-11-24
Wales|PHWC-4A6F92|EPI_ISL_814416|AA.8|2020-11-25	Wales	PHWC-4A6F92	EPI_ISL_814416	AA.8	2020-11-25
USA|CA-CZB-16170|EPI_ISL_738713|B.1.1.222|2020-11-25	USA	CA-CZB-16170	EPI_ISL_738713	B.1.1.222	2020-11-25
USA|CA-CZB-28844|EPI_ISL_1663947|B.1.1.222|2020-11-25	USA	CA-CZB-28844	EPI_ISL_1663947	B.1.1.222	2020-11-25
USA|CA-CZB-16171|EPI_ISL_738714|B.1.1.222|2020-11-25	USA	CA-CZB-16171	EPI_ISL_738714	B.1.1.222	2020-11-25
USA|CA-ALSR-5650|EPI_ISL_878287|B.1.1.222|2020-11-25	USA	CA-ALSR-5650	EPI_ISL_878287	B.1.1.222	2020-11-25
USA|CA-CZB-15959|EPI_ISL_739009|B.1.1.222|2020-11-25	USA	CA-CZB-15959	EPI_ISL_739009	B.1.1.222	2020-11-25
USA|TX-HMH-MCoV-19023|EPI_ISL_785289|B.1.1.222|2020-11-25	USA	TX-HMH-MCoV-19023	EPI_ISL_785289	B.1.1.222	2020-11-25
USA|CO-CDPHE-2100028367|EPI_ISL_771336|B.1.1.222|2020-11-25	USA	CO-CDPHE-2100028367	EPI_ISL_771336	B.1.1.222	2020-11-25
USA|CA-UCSC-255|EPI_ISL_1469854|B.1.1.222|2020-11-25	USA	CA-UCSC-255	EPI_ISL_1469854	B.1.1.222	2020-11-25
USA|CA-UCSC-917|EPI_ISL_2295500|B.1.1.222|2020-11-25	USA	CA-UCSC-917	EPI_ISL_2295500	B.1.1.222	2020-11-25
USA|TX-HMH-MCoV-19690|EPI_ISL_784044|B.1.1.222|2020-11-25	USA	TX-HMH-MCoV-19690	EPI_ISL_784044	B.1.1.222	2020-11-25
USA|CA-CZB-14906|EPI_ISL_738899|B.1.1.222|2020-11-25	USA	CA-CZB-14906	EPI_ISL_738899	B.1.1.222	2020-11-25
USA|WI-GMF-36972|EPI_ISL_942514|B.1.1.222|2020-11-25	USA	WI-GMF-36972	EPI_ISL_942514	B.1.1.222	2020-11-25
Mexico|SEARCH-100367|EPI_ISL_2231358|B.1.1.222|2020-11-25	Mexico	SEARCH-100367	EPI_ISL_2231358	B.1.1.222	2020-11-25
Mexico|SEARCH-100369|EPI_ISL_2231360|B.1.1.222|2020-11-25	Mexico	SEARCH-100369	EPI_ISL_2231360	B.1.1.222	2020-11-25
USA|CO-CDPHE-2100029920|EPI_ISL_1540152|B.1.1.222|2020-11-25	USA	CO-CDPHE-2100029920	EPI_ISL_1540152	B.1.1.222	2020-11-25
USA|CO-CDPHE-2100033303|EPI_ISL_3403757|B.1.1.222|2020-11-25	USA	CO-CDPHE-2100033303	EPI_ISL_3403757	B.1.1.222	2020-11-25
USA|OR-OHSU-6298|EPI_ISL_3726666|B.1.1.222|2020-11-25	USA	OR-OHSU-6298	EPI_ISL_3726666	B.1.1.222	2020-11-25
USA|CA-ALSR-5689|EPI_ISL_878348|B.1.1.222|2020-11-25	USA	CA-ALSR-5689	EPI_ISL_878348	B.1.1.222	2020-11-25
Mexico|SEARCH-100377|EPI_ISL_2231367|B.1.1.222|2020-11-26	Mexico	SEARCH-100377	EPI_ISL_2231367	B.1.1.222	2020-11-26
Mexico|CMX-INMEGEN-11-04|EPI_ISL_933514|B.1.1.222|2020-11-26	Mexico	CMX-INMEGEN-11-04	EPI_ISL_933514	B.1.1.222	2020-11-26
Mexico|CMX-INER-IBT-0665|EPI_ISL_4496619|B.1.1.222|2020-11-26	Mexico	CMX-INER-IBT-0665	EPI_ISL_4496619	B.1.1.222	2020-11-26
Mexico|CMX-INER-IBT-0673|EPI_ISL_4496627|B.1.1.222|2020-11-26	Mexico	CMX-INER-IBT-0673	EPI_ISL_4496627	B.1.1.222	2020-11-26
Mexico|CMX-INMEGEN-11-02|EPI_ISL_933512|B.1.1.222|2020-11-26	Mexico	CMX-INMEGEN-11-02	EPI_ISL_933512	B.1.1.222	2020-11-26
USA|TN-VUMC-000167|EPI_ISL_3726062|B.1.1.222|2020-11-26	USA	TN-VUMC-000167	EPI_ISL_3726062	B.1.1.222	2020-11-26
Mexico|GRO-InDRE_136|EPI_ISL_913939|B.1.1.222|2020-11-26	Mexico	GRO-InDRE_136	EPI_ISL_913939	B.1.1.222	2020-11-26
Mexico|CMX-INMEGEN-03-10-39|EPI_ISL_4219706|B.1.1.222|2020-11-26	Mexico	CMX-INMEGEN-03-10-39	EPI_ISL_4219706	B.1.1.222	2020-11-26
Mexico|BCN-ALSR-8475|EPI_ISL_1531938|B.1.1.222|2020-11-27	Mexico	BCN-ALSR-8475	EPI_ISL_1531938	B.1.1.222	2020-11-27
USA|OR-OHSU-6426|EPI_ISL_3726775|B.1.1.222|2020-11-27	USA	OR-OHSU-6426	EPI_ISL_3726775	B.1.1.222	2020-11-27
USA|CA-ALSR-5711|EPI_ISL_878370|B.1.1.222|2020-11-27	USA	CA-ALSR-5711	EPI_ISL_878370	B.1.1.222	2020-11-27
USA|TX-HMH-MCoV-19318|EPI_ISL_783757|B.1.1.222|2020-11-28	USA	TX-HMH-MCoV-19318	EPI_ISL_783757	B.1.1.222	2020-11-28
USA|OR-OHSU-6707|EPI_ISL_3945264|B.1.1.222|2020-11-28	USA	OR-OHSU-6707	EPI_ISL_3945264	B.1.1.222	2020-11-28
Romania|USAFSAM-S556|EPI_ISL_738317|B.1.588.1|2020-11-28	Romania	USAFSAM-S556	EPI_ISL_738317	B.1.588.1	2020-11-28
USA|KS-CDC-2-4084931|EPI_ISL_1516316|B.1.1.222|2020-11-29	USA	KS-CDC-2-4084931	EPI_ISL_1516316	B.1.1.222	2020-11-29
Mexico|YUC-NYGC-63346-20|EPI_ISL_3023844|B.1.1.222|2020-11-29	Mexico	YUC-NYGC-63346-20	EPI_ISL_3023844	B.1.1.222	2020-11-29
USA|CA-CZB-17363|EPI_ISL_955534|B.1.1.222|2020-11-30	USA	CA-CZB-17363	EPI_ISL_955534	B.1.1.222	2020-11-30
Mexico|CMX-INMEGEN-11-21|EPI_ISL_933530|B.1.1.222|2020-11-30	Mexico	CMX-INMEGEN-11-21	EPI_ISL_933530	B.1.1.222	2020-11-30
USA|AZ-TG716942|EPI_ISL_1036463|B.1.1.222|2020-11-30	USA	AZ-TG716942	EPI_ISL_1036463	B.1.1.222	2020-11-30
USA|AZ-TG724993|EPI_ISL_1113644|B.1.1.222|2020-11-30	USA	AZ-TG724993	EPI_ISL_1113644	B.1.1.222	2020-11-30
Mexico|CMX-INMEGEN-11-19|EPI_ISL_933528|B.1.1.222|2020-11-30	Mexico	CMX-INMEGEN-11-19	EPI_ISL_933528	B.1.1.222	2020-11-30
Mexico|CMX-INMEGEN-11-17|EPI_ISL_933526|B.1.1.222|2020-11-30	Mexico	CMX-INMEGEN-11-17	EPI_ISL_933526	B.1.1.222	2020-11-30
USA|WI-GMF-37881|EPI_ISL_942547|B.1.1.222|2020-11-30	USA	WI-GMF-37881	EPI_ISL_942547	B.1.1.222	2020-11-30
USA|MI-MDHHS-SC22589|EPI_ISL_737162|B.1.1.222|2020-11-30	USA	MI-MDHHS-SC22589	EPI_ISL_737162	B.1.1.222	2020-11-30
USA|CA-CHLA-PLM03408589|EPI_ISL_753502|B.1.1.222|2020-11-30	USA	CA-CHLA-PLM03408589	EPI_ISL_753502	B.1.1.222	2020-11-30
USA|CA-CHLA-PLM54539342|EPI_ISL_753504|B.1.1.222|2020-11-30	USA	CA-CHLA-PLM54539342	EPI_ISL_753504	B.1.1.222	2020-11-30
USA|KS-KHEL-0600|EPI_ISL_1323851|B.1.1.222|2020-11-30	USA	KS-KHEL-0600	EPI_ISL_1323851	B.1.1.222	2020-11-30
USA|KS-KHEL-0611|EPI_ISL_1323861|B.1.1.222|2020-11-30	USA	KS-KHEL-0611	EPI_ISL_1323861	B.1.1.222	2020-11-30
USA|CA-SEARCH-100729|EPI_ISL_2231557|B.1.1.222|2020-11-30	USA	CA-SEARCH-100729	EPI_ISL_2231557	B.1.1.222	2020-11-30
USA|WY-WPHL-20154296|EPI_ISL_1334412|B.1.1.222|2020-11-30	USA	WY-WPHL-20154296	EPI_ISL_1334412	B.1.1.222	2020-11-30
USA|CA-ALSR-5741|EPI_ISL_878398|B.1.1.222|2020-11-30	USA	CA-ALSR-5741	EPI_ISL_878398	B.1.1.222	2020-11-30
USA|CA-CZB-24064|EPI_ISL_1185293|B.1.1.222|2020-11-30	USA	CA-CZB-24064	EPI_ISL_1185293	B.1.1.222	2020-11-30
USA|CO-CDPHE-2100049559|EPI_ISL_3403819|B.1.1.222|2020-11-30	USA	CO-CDPHE-2100049559	EPI_ISL_3403819	B.1.1.222	2020-11-30
USA|WY-WPHL-20153958|EPI_ISL_770119|B.1.1.222|2020-11-30	USA	WY-WPHL-20153958	EPI_ISL_770119	B.1.1.222	2020-11-30
USA|CO-CDPHE-2100051947|EPI_ISL_2310403|B.1.1.222|2020-11-30	USA	CO-CDPHE-2100051947	EPI_ISL_2310403	B.1.1.222	2020-11-30
USA|CO-CDPHE-2100051920|EPI_ISL_2310401|B.1.1.222|2020-11-30	USA	CO-CDPHE-2100051920	EPI_ISL_2310401	B.1.1.222	2020-11-30
USA|CA-SEARCH-101202|EPI_ISL_2329535|B.1.1.222|2020-11-30	USA	CA-SEARCH-101202	EPI_ISL_2329535	B.1.1.222	2020-11-30
USA|CA-CDPH-2000001314|EPI_ISL_5713305|B.1.1.222|2020-12-01	USA	CA-CDPH-2000001314	EPI_ISL_5713305	B.1.1.222	2020-12-01
USA|CA-CDPH-2000001098|EPI_ISL_5713189|B.1.1.222|2020-12-01	USA	CA-CDPH-2000001098	EPI_ISL_5713189	B.1.1.222	2020-12-01
USA|CA-CDPH-2000001100|EPI_ISL_5713191|B.1.1.222|2020-12-01	USA	CA-CDPH-2000001100	EPI_ISL_5713191	B.1.1.222	2020-12-01
USA|CA-UCSC-345|EPI_ISL_1921085|B.1.1.222|2020-12-01	USA	CA-UCSC-345	EPI_ISL_1921085	B.1.1.222	2020-12-01
USA|TX-HMH-MCoV-34693|EPI_ISL_2215731|B.1.1.222|2020-12-01	USA	TX-HMH-MCoV-34693	EPI_ISL_2215731	B.1.1.222	2020-12-01
USA|CA-CDPH-2000001255|EPI_ISL_5713251|B.1.1.222|2020-12-01	USA	CA-CDPH-2000001255	EPI_ISL_5713251	B.1.1.222	2020-12-01
USA|MD-HP11254-PIDZTCMMND|EPI_ISL_5414237|B.1.1.222|2020-12-01	USA	MD-HP11254-PIDZTCMMND	EPI_ISL_5414237	B.1.1.222	2020-12-01
India|ILSGS00308|EPI_ISL_1372093|B.1.617.1|2020-12-01	India	ILSGS00308	EPI_ISL_1372093	B.1.617.1	2020-12-01
USA|CA-CZB-16183|EPI_ISL_738712|B.1.1.222|2020-12-02	USA	CA-CZB-16183	EPI_ISL_738712	B.1.1.222	2020-12-02
USA|CA-CZB-15651|EPI_ISL_853457|B.1.1.222|2020-12-02	USA	CA-CZB-15651	EPI_ISL_853457	B.1.1.222	2020-12-02
USA|CA-CZB-15641|EPI_ISL_853451|B.1.1.222|2020-12-02	USA	CA-CZB-15641	EPI_ISL_853451	B.1.1.222	2020-12-02
USA|CA-CZB-15639|EPI_ISL_853450|B.1.1.222|2020-12-02	USA	CA-CZB-15639	EPI_ISL_853450	B.1.1.222	2020-12-02
USA|CA-CZB-15432|EPI_ISL_739462|B.1.1.222|2020-12-02	USA	CA-CZB-15432	EPI_ISL_739462	B.1.1.222	2020-12-02
Mexico|CMX-INER-IBT-0707|EPI_ISL_4496661|B.1.1.222|2020-12-02	Mexico	CMX-INER-IBT-0707	EPI_ISL_4496661	B.1.1.222	2020-12-02
USA|NY-NYCPHL-001542|EPI_ISL_745458|B.1.1.222|2020-12-02	USA	NY-NYCPHL-001542	EPI_ISL_745458	B.1.1.222	2020-12-02
USA|CA-CDPH-2000001758|EPI_ISL_6334431|B.1.1.222|2020-12-02	USA	CA-CDPH-2000001758	EPI_ISL_6334431	B.1.1.222	2020-12-02
Mexico|SEARCH-100404|EPI_ISL_2231388|B.1.1.222|2020-12-02	Mexico	SEARCH-100404	EPI_ISL_2231388	B.1.1.222	2020-12-02
USA|CA-CZB-15725|EPI_ISL_853506|B.1.1.222|2020-12-02	USA	CA-CZB-15725	EPI_ISL_853506	B.1.1.222	2020-12-02
USA|CA-CZB-15742|EPI_ISL_853518|B.1.1.222|2020-12-02	USA	CA-CZB-15742	EPI_ISL_853518	B.1.1.222	2020-12-02
USA|CO-CDPHE-2100069059|EPI_ISL_1539539|B.1.1.222|2020-12-02	USA	CO-CDPHE-2100069059	EPI_ISL_1539539	B.1.1.222	2020-12-02
USA|CO-CDC-2-3713975|EPI_ISL_751763|B.1.1.222|2020-12-02	USA	CO-CDC-2-3713975	EPI_ISL_751763	B.1.1.222	2020-12-02
USA|CO-CDPHE-2100069076|EPI_ISL_5987257|B.1.1.222|2020-12-02	USA	CO-CDPHE-2100069076	EPI_ISL_5987257	B.1.1.222	2020-12-02
USA|CO-CDPHE-2100067832|EPI_ISL_3403816|B.1.1.222|2020-12-02	USA	CO-CDPHE-2100067832	EPI_ISL_3403816	B.1.1.222	2020-12-02
USA|CO-CDC-2-3714069|EPI_ISL_751728|B.1.1.222|2020-12-02	USA	CO-CDC-2-3714069	EPI_ISL_751728	B.1.1.222	2020-12-02
USA|CO-CDPHE-2100064790|EPI_ISL_2310411|B.1.1.222|2020-12-02	USA	CO-CDPHE-2100064790	EPI_ISL_2310411	B.1.1.222	2020-12-02
USA|CO-USAFSAM-S674|EPI_ISL_831860|B.1.1.222|2020-12-02	USA	CO-USAFSAM-S674	EPI_ISL_831860	B.1.1.222	2020-12-02
USA|CO-CDPHE-2100069308|EPI_ISL_3403817|B.1.1.222|2020-12-02	USA	CO-CDPHE-2100069308	EPI_ISL_3403817	B.1.1.222	2020-12-02
Mexico|YUC-NYGC-64292-20|EPI_ISL_3023956|B.1.1.222|2020-12-02	Mexico	YUC-NYGC-64292-20	EPI_ISL_3023956	B.1.1.222	2020-12-02
USA|AL-HGSC-JFQE|EPI_ISL_883530|B.1.1.222|2020-12-02	USA	AL-HGSC-JFQE	EPI_ISL_883530	B.1.1.222	2020-12-02
Germany|BW-FR0586|EPI_ISL_1195353|B.1.1.338|2020-12-02	Germany	BW-FR0586	EPI_ISL_1195353	B.1.1.338	2020-12-02
Spain|IB-IBV-99011587|EPI_ISL_779871|B.1.177.61|2020-12-02	Spain	IB-IBV-99011587	EPI_ISL_779871	B.1.177.61	2020-12-02
Australia|NSW1227|EPI_ISL_710125|B.1.517.1|2020-12-02	Australia	NSW1227	EPI_ISL_710125	B.1.517.1	2020-12-02
USA|CA-ALSR-5121|EPI_ISL_730364|B.1.1.222|2020-12-03	USA	CA-ALSR-5121	EPI_ISL_730364	B.1.1.222	2020-12-03
USA|CA-IGI-2466|EPI_ISL_1712480|B.1.1.222|2020-12-03	USA	CA-IGI-2466	EPI_ISL_1712480	B.1.1.222	2020-12-03
USA|CA-IGI-2468|EPI_ISL_1712482|B.1.1.222|2020-12-03	USA	CA-IGI-2468	EPI_ISL_1712482	B.1.1.222	2020-12-03
USA|WI-WSLH-201803|EPI_ISL_942119|B.1.1.222|2020-12-03	USA	WI-WSLH-201803	EPI_ISL_942119	B.1.1.222	2020-12-03
USA|TX-HMH-MCoV-37702|EPI_ISL_2211063|B.1.1.222|2020-12-03	USA	TX-HMH-MCoV-37702	EPI_ISL_2211063	B.1.1.222	2020-12-03
USA|DE-DHSS-B1061899|EPI_ISL_1137030|B.1.1.222|2020-12-03	USA	DE-DHSS-B1061899	EPI_ISL_1137030	B.1.1.222	2020-12-03
Switzerland|BE-ETHZ-521541|EPI_ISL_1260043|B.1.1.222|2020-12-03	Switzerland	BE-ETHZ-521541	EPI_ISL_1260043	B.1.1.222	2020-12-03
Mexico|CMX-INER-IBT-0693|EPI_ISL_4496647|B.1.1.222|2020-12-03	Mexico	CMX-INER-IBT-0693	EPI_ISL_4496647	B.1.1.222	2020-12-03
Mexico|CMX-INER-IBT-0701|EPI_ISL_4496655|B.1.1.222|2020-12-03	Mexico	CMX-INER-IBT-0701	EPI_ISL_4496655	B.1.1.222	2020-12-03
Mexico|SEARCH-100420|EPI_ISL_2231404|B.1.1.222|2020-12-03	Mexico	SEARCH-100420	EPI_ISL_2231404	B.1.1.222	2020-12-03
USA|CO-CDC-2-3714058|EPI_ISL_751704|B.1.1.222|2020-12-03	USA	CO-CDC-2-3714058	EPI_ISL_751704	B.1.1.222	2020-12-03
USA|UT-UPHL-2012453307|EPI_ISL_746958|B.1.1.222|2020-12-03	USA	UT-UPHL-2012453307	EPI_ISL_746958	B.1.1.222	2020-12-03
Mexico|CMX-INER-IBT-0695|EPI_ISL_4496649|B.1.1.222|2020-12-03	Mexico	CMX-INER-IBT-0695	EPI_ISL_4496649	B.1.1.222	2020-12-03
USA|CA-SEARCH-100889|EPI_ISL_2329298|B.1.1.222|2020-12-04	USA	CA-SEARCH-100889	EPI_ISL_2329298	B.1.1.222	2020-12-04
USA|CA-CHLA-PLM04835647|EPI_ISL_753654|B.1.1.222|2020-12-04	USA	CA-CHLA-PLM04835647	EPI_ISL_753654	B.1.1.222	2020-12-04
Mexico|CMX-INER-IBT-0696|EPI_ISL_4496650|B.1.1.222|2020-12-04	Mexico	CMX-INER-IBT-0696	EPI_ISL_4496650	B.1.1.222	2020-12-04
Mexico|BCN-SEARCH-103048|EPI_ISL_2835505|B.1.1.222|2020-12-04	Mexico	BCN-SEARCH-103048	EPI_ISL_2835505	B.1.1.222	2020-12-04
USA|CA-ALSR-5019|EPI_ISL_730291|B.1.1.222|2020-12-04	USA	CA-ALSR-5019	EPI_ISL_730291	B.1.1.222	2020-12-04
Mexico|SEARCH-100432|EPI_ISL_2231413|B.1.1.222|2020-12-04	Mexico	SEARCH-100432	EPI_ISL_2231413	B.1.1.222	2020-12-04
Mexico|SEARCH-100424|EPI_ISL_2231408|B.1.1.222|2020-12-04	Mexico	SEARCH-100424	EPI_ISL_2231408	B.1.1.222	2020-12-04
USA|NY-Wadsworth-292447-01|EPI_ISL_767685|B.1.1.222|2020-12-04	USA	NY-Wadsworth-292447-01	EPI_ISL_767685	B.1.1.222	2020-12-04
USA|MN-MDH-2422|EPI_ISL_911528|B.1.1.222|2020-12-04	USA	MN-MDH-2422	EPI_ISL_911528	B.1.1.222	2020-12-04
USA|CA-SEARCH-101027|EPI_ISL_2329401|B.1.1.222|2020-12-04	USA	CA-SEARCH-101027	EPI_ISL_2329401	B.1.1.222	2020-12-04
Mexico|SEARCH-100433|EPI_ISL_2231414|B.1.1.222|2020-12-04	Mexico	SEARCH-100433	EPI_ISL_2231414	B.1.1.222	2020-12-04
USA|CA-CZB-19129|EPI_ISL_979725|B.1.1.222|2020-12-04	USA	CA-CZB-19129	EPI_ISL_979725	B.1.1.222	2020-12-04
USA|FL-9210074507|EPI_ISL_2009487|B.1.1.222|2020-12-04	USA	FL-9210074507	EPI_ISL_2009487	B.1.1.222	2020-12-04
USA|CA-SEARCH-100917|EPI_ISL_2329310|B.1.1.222|2020-12-04	USA	CA-SEARCH-100917	EPI_ISL_2329310	B.1.1.222	2020-12-04
Mexico|CMX-INER-IBT-0709|EPI_ISL_4496663|B.1.1.222|2020-12-04	Mexico	CMX-INER-IBT-0709	EPI_ISL_4496663	B.1.1.222	2020-12-04
USA|WY-WPHL-20158707|EPI_ISL_1201415|B.1.1.222|2020-12-04	USA	WY-WPHL-20158707	EPI_ISL_1201415	B.1.1.222	2020-12-04
Congo|Q001C088AF-2101-TM-r1-002|EPI_ISL_912354|B.1.214.1|2020-12-05	Congo	Q001C088AF-2101-TM-r1-002	EPI_ISL_912354	B.1.214.1	2020-12-05
Spain|MD-IBV-99014277|EPI_ISL_861787|B.1.575.1|2020-12-05	Spain	MD-IBV-99014277	EPI_ISL_861787	B.1.575.1	2020-12-05
Mexico|CMX-INER-IBT-0714|EPI_ISL_4496668|B.1.1.222|2020-12-06	Mexico	CMX-INER-IBT-0714	EPI_ISL_4496668	B.1.1.222	2020-12-06
Mexico|CMX-INER-IBT-0684|EPI_ISL_4496638|B.1.1.222|2020-12-06	Mexico	CMX-INER-IBT-0684	EPI_ISL_4496638	B.1.1.222	2020-12-06
Netherlands|ZH-EMC-1052|EPI_ISL_722792|B.1.177.34|2020-12-06	Netherlands	ZH-EMC-1052	EPI_ISL_722792	B.1.177.34	2020-12-06
England|ALDP-C06DCB|EPI_ISL_709546|B.1.563|2020-12-06	England	ALDP-C06DCB	EPI_ISL_709546	B.1.563	2020-12-06
USA|CA-SDCPHL-60221230|EPI_ISL_2840590|B.1.1.222|2020-12-07	USA	CA-SDCPHL-60221230	EPI_ISL_2840590	B.1.1.222	2020-12-07
USA|TX-HMH-MCoV-41115|EPI_ISL_2215082|B.1.1.222|2020-12-07	USA	TX-HMH-MCoV-41115	EPI_ISL_2215082	B.1.1.222	2020-12-07
Mexico|SEARCH-100444|EPI_ISL_2231421|B.1.1.222|2020-12-07	Mexico	SEARCH-100444	EPI_ISL_2231421	B.1.1.222	2020-12-07
USA|CA-ALSR-5625|EPI_ISL_878242|B.1.1.222|2020-12-07	USA	CA-ALSR-5625	EPI_ISL_878242	B.1.1.222	2020-12-07
Mexico|SEARCH-100441|EPI_ISL_2231419|B.1.1.222|2020-12-07	Mexico	SEARCH-100441	EPI_ISL_2231419	B.1.1.222	2020-12-07
USA|CA-CDPH-UC517|EPI_ISL_847657|B.1.1.222|2020-12-07	USA	CA-CDPH-UC517	EPI_ISL_847657	B.1.1.222	2020-12-07
USA|CO-CDPHE-2100078496|EPI_ISL_6581855|B.1.1.222|2020-12-07	USA	CO-CDPHE-2100078496	EPI_ISL_6581855	B.1.1.222	2020-12-07
USA|CA-SEARCH-18261|EPI_ISL_3215451|B.1.1.222|2020-12-07	USA	CA-SEARCH-18261	EPI_ISL_3215451	B.1.1.222	2020-12-07
Mexico|CMX-INER-IBT-0692|EPI_ISL_4496646|B.1.1.222|2020-12-08	Mexico	CMX-INER-IBT-0692	EPI_ISL_4496646	B.1.1.222	2020-12-08
Mexico|CMX-INER-IBT-104|EPI_ISL_1302399|B.1.1.222|2020-12-08	Mexico	CMX-INER-IBT-104	EPI_ISL_1302399	B.1.1.222	2020-12-08
USA|TX-HMH-MCoV-39303|EPI_ISL_2217806|B.1.1.222|2020-12-08	USA	TX-HMH-MCoV-39303	EPI_ISL_2217806	B.1.1.222	2020-12-08
USA|CA-UCSC-324|EPI_ISL_1469921|B.1.1.222|2020-12-08	USA	CA-UCSC-324	EPI_ISL_1469921	B.1.1.222	2020-12-08
Mexico|CMX-INER-IBT-0694|EPI_ISL_4496648|B.1.1.222|2020-12-08	Mexico	CMX-INER-IBT-0694	EPI_ISL_4496648	B.1.1.222	2020-12-08
USA|TX-HMH-MCoV-39439|EPI_ISL_2218447|B.1.1.222|2020-12-08	USA	TX-HMH-MCoV-39439	EPI_ISL_2218447	B.1.1.222	2020-12-08
USA|TX-HMH-MCoV-39320|EPI_ISL_2217873|B.1.1.222|2020-12-08	USA	TX-HMH-MCoV-39320	EPI_ISL_2217873	B.1.1.222	2020-12-08
USA|TX-HMH-MCoV-38675|EPI_ISL_2213898|B.1.1.222|2020-12-08	USA	TX-HMH-MCoV-38675	EPI_ISL_2213898	B.1.1.222	2020-12-08
USA|MD-HP11261-PIDUIHAYTA|EPI_ISL_5414243|B.1.1.222|2020-12-08	USA	MD-HP11261-PIDUIHAYTA	EPI_ISL_5414243	B.1.1.222	2020-12-08
USA|CA-SEARCH-102749|EPI_ISL_2712809|B.1.1.222|2020-12-08	USA	CA-SEARCH-102749	EPI_ISL_2712809	B.1.1.222	2020-12-08
USA|CA-SEARCH-102733|EPI_ISL_2712795|B.1.1.222|2020-12-08	USA	CA-SEARCH-102733	EPI_ISL_2712795	B.1.1.222	2020-12-08
USA|CA-SEARCH-102725|EPI_ISL_2712788|B.1.1.222|2020-12-08	USA	CA-SEARCH-102725	EPI_ISL_2712788	B.1.1.222	2020-12-08
USA|CA-SEARCH-102763|EPI_ISL_2712822|B.1.1.222|2020-12-08	USA	CA-SEARCH-102763	EPI_ISL_2712822	B.1.1.222	2020-12-08
USA|CA-SEARCH-102741|EPI_ISL_2712803|B.1.1.222|2020-12-08	USA	CA-SEARCH-102741	EPI_ISL_2712803	B.1.1.222	2020-12-08
USA|CA-SEARCH-102718|EPI_ISL_2712782|B.1.1.222|2020-12-08	USA	CA-SEARCH-102718	EPI_ISL_2712782	B.1.1.222	2020-12-08
USA|CA-SEARCH-102756|EPI_ISL_2712816|B.1.1.222|2020-12-08	USA	CA-SEARCH-102756	EPI_ISL_2712816	B.1.1.222	2020-12-08
Mexico|CMX-INER-IBT-0685|EPI_ISL_4496639|B.1.1.222|2020-12-08	Mexico	CMX-INER-IBT-0685	EPI_ISL_4496639	B.1.1.222	2020-12-08
USA|CA-SEARCH-9911|EPI_ISL_2231246|B.1.1.222|2020-12-08	USA	CA-SEARCH-9911	EPI_ISL_2231246	B.1.1.222	2020-12-08
USA|CA-CDPH-UC530|EPI_ISL_847705|B.1.1.222|2020-12-08	USA	CA-CDPH-UC530	EPI_ISL_847705	B.1.1.222	2020-12-08
USA|CA-SEARCH-18252|EPI_ISL_3215446|B.1.1.222|2020-12-08	USA	CA-SEARCH-18252	EPI_ISL_3215446	B.1.1.222	2020-12-08
USA|CA-CDPH-UC527|EPI_ISL_847655|B.1.1.222|2020-12-08	USA	CA-CDPH-UC527	EPI_ISL_847655	B.1.1.222	2020-12-08
Mexico|CMX-INER-IBT-0698|EPI_ISL_4496652|B.1.1.222|2020-12-08	Mexico	CMX-INER-IBT-0698	EPI_ISL_4496652	B.1.1.222	2020-12-08
Mexico|CMX-INER-IBT-0702|EPI_ISL_4496656|B.1.1.222|2020-12-08	Mexico	CMX-INER-IBT-0702	EPI_ISL_4496656	B.1.1.222	2020-12-08
USA|CA-SC20071|EPI_ISL_832402|B.1.1.517|2020-12-08	USA	CA-SC20071	EPI_ISL_832402	B.1.1.517	2020-12-08
USA|NY-NYCPHL-001663|EPI_ISL_823886|B.1.526.2|2020-12-08	USA	NY-NYCPHL-001663	EPI_ISL_823886	B.1.526.2	2020-12-08
USA|CA-CDPH-2000006192|EPI_ISL_3105623|B.1.1.222|2020-12-09	USA	CA-CDPH-2000006192	EPI_ISL_3105623	B.1.1.222	2020-12-09
USA|CA-CZB-24399|EPI_ISL_1184668|B.1.1.222|2020-12-09	USA	CA-CZB-24399	EPI_ISL_1184668	B.1.1.222	2020-12-09
Mexico|GRO-InDRE_159|EPI_ISL_913961|B.1.1.222|2020-12-09	Mexico	GRO-InDRE_159	EPI_ISL_913961	B.1.1.222	2020-12-09
Mexico|CMX-INER-IBT-0679|EPI_ISL_4496633|B.1.1.222|2020-12-09	Mexico	CMX-INER-IBT-0679	EPI_ISL_4496633	B.1.1.222	2020-12-09
USA|CA-CDPH-2000006190|EPI_ISL_3105750|B.1.1.222|2020-12-09	USA	CA-CDPH-2000006190	EPI_ISL_3105750	B.1.1.222	2020-12-09
USA|CA-CDPH-2000006241|EPI_ISL_3105782|B.1.1.222|2020-12-09	USA	CA-CDPH-2000006241	EPI_ISL_3105782	B.1.1.222	2020-12-09
USA|WI-WSLH-201894|EPI_ISL_942178|B.1.1.222|2020-12-09	USA	WI-WSLH-201894	EPI_ISL_942178	B.1.1.222	2020-12-09
Mexico|CMX-INER-IBT-0933|EPI_ISL_5194953|B.1.1.222|2020-12-09	Mexico	CMX-INER-IBT-0933	EPI_ISL_5194953	B.1.1.222	2020-12-09
USA|TX-HMH-MCoV-36490|EPI_ISL_2206678|B.1.1.222|2020-12-09	USA	TX-HMH-MCoV-36490	EPI_ISL_2206678	B.1.1.222	2020-12-09
USA|TX-HMH-MCoV-36526|EPI_ISL_2206797|B.1.1.222|2020-12-09	USA	TX-HMH-MCoV-36526	EPI_ISL_2206797	B.1.1.222	2020-12-09
USA|CA-SEARCH-9880|EPI_ISL_2231217|B.1.1.222|2020-12-09	USA	CA-SEARCH-9880	EPI_ISL_2231217	B.1.1.222	2020-12-09
USA|CA-CDPH-2000005373|EPI_ISL_5761408|B.1.1.222|2020-12-09	USA	CA-CDPH-2000005373	EPI_ISL_5761408	B.1.1.222	2020-12-09
USA|CA-CDPH-2000005393|EPI_ISL_2968873|B.1.1.222|2020-12-09	USA	CA-CDPH-2000005393	EPI_ISL_2968873	B.1.1.222	2020-12-09
USA|CA-CDPH-2000005406|EPI_ISL_2968886|B.1.1.222|2020-12-09	USA	CA-CDPH-2000005406	EPI_ISL_2968886	B.1.1.222	2020-12-09
USA|CA-CDPH-2000005408|EPI_ISL_2968888|B.1.1.222|2020-12-09	USA	CA-CDPH-2000005408	EPI_ISL_2968888	B.1.1.222	2020-12-09
USA|CA-CDPH-2000005423|EPI_ISL_2968902|B.1.1.222|2020-12-09	USA	CA-CDPH-2000005423	EPI_ISL_2968902	B.1.1.222	2020-12-09
USA|CA-SEARCH-9874|EPI_ISL_2231211|B.1.1.222|2020-12-09	USA	CA-SEARCH-9874	EPI_ISL_2231211	B.1.1.222	2020-12-09
USA|CA-SEARCH-9870|EPI_ISL_2231209|B.1.1.222|2020-12-09	USA	CA-SEARCH-9870	EPI_ISL_2231209	B.1.1.222	2020-12-09
USA|CA-SEARCH-9937|EPI_ISL_2231266|B.1.1.222|2020-12-09	USA	CA-SEARCH-9937	EPI_ISL_2231266	B.1.1.222	2020-12-09
USA|CA-CDPH-2000005378|EPI_ISL_2968861|B.1.1.222|2020-12-09	USA	CA-CDPH-2000005378	EPI_ISL_2968861	B.1.1.222	2020-12-09
USA|WA-S9104|EPI_ISL_2736472|B.1.1.222|2020-12-09	USA	WA-S9104	EPI_ISL_2736472	B.1.1.222	2020-12-09
USA|CA-CDPH-UC537|EPI_ISL_847784|B.1.1.222|2020-12-09	USA	CA-CDPH-UC537	EPI_ISL_847784	B.1.1.222	2020-12-09
USA|CA-CDPH-UC533|EPI_ISL_847649|B.1.1.222|2020-12-09	USA	CA-CDPH-UC533	EPI_ISL_847649	B.1.1.222	2020-12-09
USA|CA-CDPH-2000006315|EPI_ISL_3105830|B.1.1.222|2020-12-09	USA	CA-CDPH-2000006315	EPI_ISL_3105830	B.1.1.222	2020-12-09
USA|TX-HMH-MCoV-39422|EPI_ISL_2218353|B.1.1.222|2020-12-09	USA	TX-HMH-MCoV-39422	EPI_ISL_2218353	B.1.1.222	2020-12-09
USA|CA-CDPH-2000006307|EPI_ISL_3105825|B.1.1.222|2020-12-09	USA	CA-CDPH-2000006307	EPI_ISL_3105825	B.1.1.222	2020-12-09
USA|CA-CZB-24405|EPI_ISL_1184673|B.1.1.222|2020-12-09	USA	CA-CZB-24405	EPI_ISL_1184673	B.1.1.222	2020-12-09
USA|CA-CDPH-2000005403|EPI_ISL_2968883|B.1.1.222|2020-12-09	USA	CA-CDPH-2000005403	EPI_ISL_2968883	B.1.1.222	2020-12-09
USA|CA-CDPH-2000005405|EPI_ISL_2968885|B.1.1.222|2020-12-09	USA	CA-CDPH-2000005405	EPI_ISL_2968885	B.1.1.222	2020-12-09
USA|CA-SEARCH-41112|EPI_ISL_3215780|B.1.1.222|2020-12-09	USA	CA-SEARCH-41112	EPI_ISL_3215780	B.1.1.222	2020-12-09
USA|CA-CDPH-2000005402|EPI_ISL_2968882|B.1.1.222|2020-12-09	USA	CA-CDPH-2000005402	EPI_ISL_2968882	B.1.1.222	2020-12-09
Mexico|CMX-INER-IBT-0943|EPI_ISL_5194965|B.1.1.222|2020-12-09	Mexico	CMX-INER-IBT-0943	EPI_ISL_5194965	B.1.1.222	2020-12-09
USA|NY-Wadsworth-21014320-01|EPI_ISL_1226664|B.1.1.222|2020-12-09	USA	NY-Wadsworth-21014320-01	EPI_ISL_1226664	B.1.1.222	2020-12-09
USA|CA-CZB-16727|EPI_ISL_979580|B.1.1.222|2020-12-09	USA	CA-CZB-16727	EPI_ISL_979580	B.1.1.222	2020-12-09
USA|KS-KHEL-0753|EPI_ISL_1412493|B.1.1.222|2020-12-10	USA	KS-KHEL-0753	EPI_ISL_1412493	B.1.1.222	2020-12-10
Mexico|CMX-INMEGEN-02-05-06|EPI_ISL_1060615|B.1.1.222|2020-12-10	Mexico	CMX-INMEGEN-02-05-06	EPI_ISL_1060615	B.1.1.222	2020-12-10
USA|TX-HMH-MCoV-33226|EPI_ISL_2200182|B.1.1.222|2020-12-10	USA	TX-HMH-MCoV-33226	EPI_ISL_2200182	B.1.1.222	2020-12-10
USA|CA-CDPH-2000006317|EPI_ISL_3105832|B.1.1.222|2020-12-10	USA	CA-CDPH-2000006317	EPI_ISL_3105832	B.1.1.222	2020-12-10
USA|CA-UCSC-449|EPI_ISL_2031793|B.1.1.222|2020-12-10	USA	CA-UCSC-449	EPI_ISL_2031793	B.1.1.222	2020-12-10
USA|CA-ALSR-6502|EPI_ISL_962792|B.1.1.222|2020-12-10	USA	CA-ALSR-6502	EPI_ISL_962792	B.1.1.222	2020-12-10
USA|PA-MGEL-01309|EPI_ISL_853386|B.1.1.222|2020-12-10	USA	PA-MGEL-01309	EPI_ISL_853386	B.1.1.222	2020-12-10
USA|WI-WSLH-201994|EPI_ISL_942220|B.1.1.222|2020-12-10	USA	WI-WSLH-201994	EPI_ISL_942220	B.1.1.222	2020-12-10
USA|WI-WSLH-201996|EPI_ISL_942222|B.1.1.222|2020-12-10	USA	WI-WSLH-201996	EPI_ISL_942222	B.1.1.222	2020-12-10
USA|CA-CDPH-2000007414|EPI_ISL_3637220|B.1.1.222|2020-12-10	USA	CA-CDPH-2000007414	EPI_ISL_3637220	B.1.1.222	2020-12-10
USA|KS-KHEL-0760|EPI_ISL_1412513|B.1.1.222|2020-12-10	USA	KS-KHEL-0760	EPI_ISL_1412513	B.1.1.222	2020-12-10
Mexico|YUC-NYGC-66133-20|EPI_ISL_3023842|B.1.1.222|2020-12-10	Mexico	YUC-NYGC-66133-20	EPI_ISL_3023842	B.1.1.222	2020-12-10
USA|CA-SEARCH-102772|EPI_ISL_2712829|B.1.1.222|2020-12-10	USA	CA-SEARCH-102772	EPI_ISL_2712829	B.1.1.222	2020-12-10
Mexico|SEARCH-100758|EPI_ISL_2329060|B.1.1.222|2020-12-10	Mexico	SEARCH-100758	EPI_ISL_2329060	B.1.1.222	2020-12-10
USA|CA-SEARCH-101015|EPI_ISL_2329390|B.1.1.222|2020-12-10	USA	CA-SEARCH-101015	EPI_ISL_2329390	B.1.1.222	2020-12-10
USA|TX-HMH-MCoV-36644|EPI_ISL_2207212|B.1.1.222|2020-12-10	USA	TX-HMH-MCoV-36644	EPI_ISL_2207212	B.1.1.222	2020-12-10
USA|CA-CDPH-2000007754|EPI_ISL_3637320|B.1.1.222|2020-12-10	USA	CA-CDPH-2000007754	EPI_ISL_3637320	B.1.1.222	2020-12-10
Mexico|CMX-INER-IBT-0942|EPI_ISL_5194962|B.1.1.222|2020-12-10	Mexico	CMX-INER-IBT-0942	EPI_ISL_5194962	B.1.1.222	2020-12-10
United_Kingdom|MILK-C90FA2|EPI_ISL_777141|B.1.1.222|2020-12-10	United_Kingdom	MILK-C90FA2	EPI_ISL_777141	B.1.1.222	2020-12-10
USA|CA-SEARCH-102764|EPI_ISL_2712823|B.1.1.222|2020-12-10	USA	CA-SEARCH-102764	EPI_ISL_2712823	B.1.1.222	2020-12-10
USA|UT-UPHL-2101000566|EPI_ISL_802874|B.1.258.23|2020-12-10	USA	UT-UPHL-2101000566	EPI_ISL_802874	B.1.258.23	2020-12-10
USA|CA-SEARCH-100705|EPI_ISL_2231548|B.1.1.222|2020-12-11	USA	CA-SEARCH-100705	EPI_ISL_2231548	B.1.1.222	2020-12-11
Mexico|CMX-INMEGEN-02-05-08|EPI_ISL_1060614|B.1.1.222|2020-12-11	Mexico	CMX-INMEGEN-02-05-08	EPI_ISL_1060614	B.1.1.222	2020-12-11
USA|CA-UCSC-471|EPI_ISL_2031814|B.1.1.222|2020-12-11	USA	CA-UCSC-471	EPI_ISL_2031814	B.1.1.222	2020-12-11
USA|UT-UPHL-2105687691|EPI_ISL_2291455|B.1.1.222|2020-12-11	USA	UT-UPHL-2105687691	EPI_ISL_2291455	B.1.1.222	2020-12-11
USA|TX-HMH-MCoV-36637|EPI_ISL_2207192|B.1.1.222|2020-12-11	USA	TX-HMH-MCoV-36637	EPI_ISL_2207192	B.1.1.222	2020-12-11
USA|TX-HMH-MCoV-36636|EPI_ISL_2207190|B.1.1.222|2020-12-11	USA	TX-HMH-MCoV-36636	EPI_ISL_2207190	B.1.1.222	2020-12-11
USA|MD-HP11308-PIDYHCIHQL|EPI_ISL_5414382|B.1.1.222|2020-12-11	USA	MD-HP11308-PIDYHCIHQL	EPI_ISL_5414382	B.1.1.222	2020-12-11
USA|CA-SEARCH-9481|EPI_ISL_1969365|B.1.1.222|2020-12-11	USA	CA-SEARCH-9481	EPI_ISL_1969365	B.1.1.222	2020-12-11
USA|CA-SEARCH-102735|EPI_ISL_2712797|B.1.1.222|2020-12-11	USA	CA-SEARCH-102735	EPI_ISL_2712797	B.1.1.222	2020-12-11
USA|CA-CDPH-2000007459|EPI_ISL_3637488|B.1.1.222|2020-12-11	USA	CA-CDPH-2000007459	EPI_ISL_3637488	B.1.1.222	2020-12-11
Mexico|TLA-InDRE_141|EPI_ISL_913944|B.1.1.222|2020-12-11	Mexico	TLA-InDRE_141	EPI_ISL_913944	B.1.1.222	2020-12-11
Angola|KRISP-K009785|EPI_ISL_1347937|B.1.525|2020-12-11	Angola	KRISP-K009785	EPI_ISL_1347937	B.1.525	2020-12-11
Mexico|GRO-InDRE_146|EPI_ISL_913949|B.1.1.222|2020-12-12	Mexico	GRO-InDRE_146	EPI_ISL_913949	B.1.1.222	2020-12-12
USA|WY-WPHL-20164682|EPI_ISL_1482491|B.1.1.222|2020-12-12	USA	WY-WPHL-20164682	EPI_ISL_1482491	B.1.1.222	2020-12-12
USA|UT-UPHL-2105776460|EPI_ISL_2291413|B.1.1.222|2020-12-12	USA	UT-UPHL-2105776460	EPI_ISL_2291413	B.1.1.222	2020-12-12
USA|CA-CDPH-2000014360|EPI_ISL_5443381|B.1.1.222|2020-12-12	USA	CA-CDPH-2000014360	EPI_ISL_5443381	B.1.1.222	2020-12-12
USA|CA-SEARCH-100671|EPI_ISL_2231532|B.1.1.222|2020-12-12	USA	CA-SEARCH-100671	EPI_ISL_2231532	B.1.1.222	2020-12-12
USA|CA-SEARCH-9464|EPI_ISL_1969352|B.1.1.222|2020-12-12	USA	CA-SEARCH-9464	EPI_ISL_1969352	B.1.1.222	2020-12-12
USA|NM-DOH-2020616663|EPI_ISL_751824|B.1.1.222|2020-12-12	USA	NM-DOH-2020616663	EPI_ISL_751824	B.1.1.222	2020-12-12
USA|NC-UNCC-000338|EPI_ISL_1938142|B.1.1.222|2020-12-12	USA	NC-UNCC-000338	EPI_ISL_1938142	B.1.1.222	2020-12-12
Mexico|CMX-INER-IBT-0939|EPI_ISL_5194959|B.1.1.222|2020-12-12	Mexico	CMX-INER-IBT-0939	EPI_ISL_5194959	B.1.1.222	2020-12-12
Mexico|NLE-UANL-033|EPI_ISL_779194|B.1.1.222|2020-12-12	Mexico	NLE-UANL-033	EPI_ISL_779194	B.1.1.222	2020-12-12
USA|TX-HMH-MCoV-33355|EPI_ISL_2200619|B.1.1.222|2020-12-13	USA	TX-HMH-MCoV-33355	EPI_ISL_2200619	B.1.1.222	2020-12-13
USA|CA-SEARCH-100200|EPI_ISL_2231314|B.1.1.222|2020-12-13	USA	CA-SEARCH-100200	EPI_ISL_2231314	B.1.1.222	2020-12-13
USA|UT-UPHL-210528580221|EPI_ISL_2458560|B.1.1.222|2020-12-13	USA	UT-UPHL-210528580221	EPI_ISL_2458560	B.1.1.222	2020-12-13
USA|TX-HMH-MCoV-33461|EPI_ISL_2200768|B.1.1.222|2020-12-13	USA	TX-HMH-MCoV-33461	EPI_ISL_2200768	B.1.1.222	2020-12-13
Denmark|DCGC-22492|EPI_ISL_757470|A.27|2020-12-14	Denmark	DCGC-22492	EPI_ISL_757470	A.27	2020-12-14
USA|CA-SEARCH-9613|EPI_ISL_1969475|B.1.1.222|2020-12-14	USA	CA-SEARCH-9613	EPI_ISL_1969475	B.1.1.222	2020-12-14
USA|CA-CDPH-2000014627|EPI_ISL_5442324|B.1.1.222|2020-12-14	USA	CA-CDPH-2000014627	EPI_ISL_5442324	B.1.1.222	2020-12-14
USA|TX-HMH-MCoV-36358|EPI_ISL_2206215|B.1.1.222|2020-12-14	USA	TX-HMH-MCoV-36358	EPI_ISL_2206215	B.1.1.222	2020-12-14
USA|TX-HMH-MCoV-36307|EPI_ISL_2206063|B.1.1.222|2020-12-14	USA	TX-HMH-MCoV-36307	EPI_ISL_2206063	B.1.1.222	2020-12-14
USA|MO-MSPHL-000361|EPI_ISL_1362903|B.1.1.222|2020-12-14	USA	MO-MSPHL-000361	EPI_ISL_1362903	B.1.1.222	2020-12-14
USA|CA-CDPH-2000014220|EPI_ISL_5443273|B.1.1.222|2020-12-14	USA	CA-CDPH-2000014220	EPI_ISL_5443273	B.1.1.222	2020-12-14
USA|SD-CDC-2-4044518|EPI_ISL_3354356|B.1.1.222|2020-12-14	USA	SD-CDC-2-4044518	EPI_ISL_3354356	B.1.1.222	2020-12-14
USA|CA-CDPH-2000014218|EPI_ISL_5443271|B.1.1.222|2020-12-14	USA	CA-CDPH-2000014218	EPI_ISL_5443271	B.1.1.222	2020-12-14
USA|CA-CDPH-2000014244|EPI_ISL_5443290|B.1.1.222|2020-12-14	USA	CA-CDPH-2000014244	EPI_ISL_5443290	B.1.1.222	2020-12-14
USA|CA-CDPH-2000014257|EPI_ISL_5443303|B.1.1.222|2020-12-14	USA	CA-CDPH-2000014257	EPI_ISL_5443303	B.1.1.222	2020-12-14
USA|CA-CDPH-2000014252|EPI_ISL_5443298|B.1.1.222|2020-12-14	USA	CA-CDPH-2000014252	EPI_ISL_5443298	B.1.1.222	2020-12-14
USA|CA-CDPH-2000014261|EPI_ISL_5443305|B.1.1.222|2020-12-14	USA	CA-CDPH-2000014261	EPI_ISL_5443305	B.1.1.222	2020-12-14
USA|TX-HMH-MCoV-36052|EPI_ISL_2205869|B.1.1.222|2020-12-14	USA	TX-HMH-MCoV-36052	EPI_ISL_2205869	B.1.1.222	2020-12-14
USA|CO-CDPHE-2100110479|EPI_ISL_5704340|B.1.1.222|2020-12-14	USA	CO-CDPHE-2100110479	EPI_ISL_5704340	B.1.1.222	2020-12-14
Switzerland|ZH-UZH-IMV127|EPI_ISL_733497|B.1.1.445|2020-12-14	Switzerland	ZH-UZH-IMV127	EPI_ISL_733497	B.1.1.445	2020-12-14
USA|WY-WYPHL20165968|EPI_ISL_1857384|B.1.1.222|2020-12-15	USA	WY-WYPHL20165968	EPI_ISL_1857384	B.1.1.222	2020-12-15
USA|NY-Wadsworth-287341-01|EPI_ISL_767454|B.1.1.222|2020-12-15	USA	NY-Wadsworth-287341-01	EPI_ISL_767454	B.1.1.222	2020-12-15
Mexico|TAM-InDRE_165|EPI_ISL_913966|B.1.1.222|2020-12-15	Mexico	TAM-InDRE_165	EPI_ISL_913966	B.1.1.222	2020-12-15
Mexico|YUC-NYGC-67199-20|EPI_ISL_3023848|B.1.1.222|2020-12-15	Mexico	YUC-NYGC-67199-20	EPI_ISL_3023848	B.1.1.222	2020-12-15
USA|TX-HMH-MCoV-36718|EPI_ISL_2207498|B.1.1.222|2020-12-15	USA	TX-HMH-MCoV-36718	EPI_ISL_2207498	B.1.1.222	2020-12-15
USA|CA-SEARCH-8680|EPI_ISL_1969277|B.1.1.222|2020-12-15	USA	CA-SEARCH-8680	EPI_ISL_1969277	B.1.1.222	2020-12-15
USA|SD-CDC-2-4044434|EPI_ISL_3354355|B.1.1.222|2020-12-15	USA	SD-CDC-2-4044434	EPI_ISL_3354355	B.1.1.222	2020-12-15
USA|CA-CDPH-2000014250|EPI_ISL_5443296|B.1.1.222|2020-12-15	USA	CA-CDPH-2000014250	EPI_ISL_5443296	B.1.1.222	2020-12-15
USA|CA-CDPH-2000015533|EPI_ISL_5443653|B.1.1.222|2020-12-15	USA	CA-CDPH-2000015533	EPI_ISL_5443653	B.1.1.222	2020-12-15
USA|AZ-TG761365|EPI_ISL_1297143|B.1.1.222|2020-12-15	USA	AZ-TG761365	EPI_ISL_1297143	B.1.1.222	2020-12-15
USA|TX-HMH-MCoV-35870|EPI_ISL_2204360|B.1.1.222|2020-12-15	USA	TX-HMH-MCoV-35870	EPI_ISL_2204360	B.1.1.222	2020-12-15
USA|CO-CDPHE-2100117672|EPI_ISL_2310836|B.1.1.222|2020-12-15	USA	CO-CDPHE-2100117672	EPI_ISL_2310836	B.1.1.222	2020-12-15
USA|CA-CDPH-2000014330|EPI_ISL_5443360|B.1.1.222|2020-12-15	USA	CA-CDPH-2000014330	EPI_ISL_5443360	B.1.1.222	2020-12-15
USA|WI-GMF-42411|EPI_ISL_942704|B.1.1.222|2020-12-15	USA	WI-GMF-42411	EPI_ISL_942704	B.1.1.222	2020-12-15
USA|CA-CZB-19472|EPI_ISL_1027543|B.1.1.222|2020-12-15	USA	CA-CZB-19472	EPI_ISL_1027543	B.1.1.222	2020-12-15
USA|CA-SEARCH-100181|EPI_ISL_2231303|B.1.1.222|2020-12-15	USA	CA-SEARCH-100181	EPI_ISL_2231303	B.1.1.222	2020-12-15
USA|CA-SEARCH-100197|EPI_ISL_2231313|B.1.1.222|2020-12-15	USA	CA-SEARCH-100197	EPI_ISL_2231313	B.1.1.222	2020-12-15
Mexico|CMX-INMEGEN-01-01-01|EPI_ISL_1005656|B.1.1.222|2020-12-16	Mexico	CMX-INMEGEN-01-01-01	EPI_ISL_1005656	B.1.1.222	2020-12-16
Mexico|CMX-INMEGEN-01-01-04|EPI_ISL_1005659|B.1.1.222|2020-12-16	Mexico	CMX-INMEGEN-01-01-04	EPI_ISL_1005659	B.1.1.222	2020-12-16
USA|CA-CDPH-2000014526|EPI_ISL_5443524|B.1.1.222|2020-12-16	USA	CA-CDPH-2000014526	EPI_ISL_5443524	B.1.1.222	2020-12-16
USA|CA-CDPH-2000014529|EPI_ISL_5443527|B.1.1.222|2020-12-16	USA	CA-CDPH-2000014529	EPI_ISL_5443527	B.1.1.222	2020-12-16
USA|NY-UB-00381|EPI_ISL_1009497|B.1.1.222|2020-12-16	USA	NY-UB-00381	EPI_ISL_1009497	B.1.1.222	2020-12-16
USA|TX-HMH-MCoV-33263|EPI_ISL_2200219|B.1.1.222|2020-12-16	USA	TX-HMH-MCoV-33263	EPI_ISL_2200219	B.1.1.222	2020-12-16
USA|TX-HMH-MCoV-36601|EPI_ISL_2207069|B.1.1.222|2020-12-16	USA	TX-HMH-MCoV-36601	EPI_ISL_2207069	B.1.1.222	2020-12-16
USA|CA-CDPH-2000015666|EPI_ISL_5443703|B.1.1.222|2020-12-16	USA	CA-CDPH-2000015666	EPI_ISL_5443703	B.1.1.222	2020-12-16
USA|CA-CZB-17549|EPI_ISL_955602|B.1.1.222|2020-12-16	USA	CA-CZB-17549	EPI_ISL_955602	B.1.1.222	2020-12-16
USA|CA-SEARCH-101908|EPI_ISL_2628441|B.1.1.222|2020-12-16	USA	CA-SEARCH-101908	EPI_ISL_2628441	B.1.1.222	2020-12-16
Mexico|AGU-InDRE_232|EPI_ISL_933709|B.1.1.222|2020-12-16	Mexico	AGU-InDRE_232	EPI_ISL_933709	B.1.1.222	2020-12-16
USA|CA-LACPHL-AF00023|EPI_ISL_737258|B.1.1.222|2020-12-16	USA	CA-LACPHL-AF00023	EPI_ISL_737258	B.1.1.222	2020-12-16
USA|CA-LACPHL-AF00021|EPI_ISL_737256|B.1.1.222|2020-12-16	USA	CA-LACPHL-AF00021	EPI_ISL_737256	B.1.1.222	2020-12-16
USA|CA-LACPHL-AF00129|EPI_ISL_832110|B.1.1.222|2020-12-16	USA	CA-LACPHL-AF00129	EPI_ISL_832110	B.1.1.222	2020-12-16
Mexico|AGU-InDRE_357|EPI_ISL_1060723|B.1.1.222|2020-12-16	Mexico	AGU-InDRE_357	EPI_ISL_1060723	B.1.1.222	2020-12-16
USA|CA-CDPH-UC601|EPI_ISL_847637|B.1.1.222|2020-12-16	USA	CA-CDPH-UC601	EPI_ISL_847637	B.1.1.222	2020-12-16
Canada|BC-BCCDC-9898|EPI_ISL_976530|B.1.1.222|2020-12-16	Canada	BC-BCCDC-9898	EPI_ISL_976530	B.1.1.222	2020-12-16
USA|CA-CDPH-UC1293|EPI_ISL_977848|B.1.1.222|2020-12-16	USA	CA-CDPH-UC1293	EPI_ISL_977848	B.1.1.222	2020-12-16
USA|CA-CDPH-2000016506|EPI_ISL_5442982|B.1.1.222|2020-12-16	USA	CA-CDPH-2000016506	EPI_ISL_5442982	B.1.1.222	2020-12-16
USA|CA-CDPH-2000016478|EPI_ISL_5442955|B.1.1.222|2020-12-16	USA	CA-CDPH-2000016478	EPI_ISL_5442955	B.1.1.222	2020-12-16
USA|TX-HMH-MCoV-36447|EPI_ISL_2206538|B.1.1.222|2020-12-17	USA	TX-HMH-MCoV-36447	EPI_ISL_2206538	B.1.1.222	2020-12-17
USA|CA-CDPH-UC1289|EPI_ISL_977844|B.1.1.222|2020-12-17	USA	CA-CDPH-UC1289	EPI_ISL_977844	B.1.1.222	2020-12-17
USA|WY-WPHL-20167597|EPI_ISL_1373427|B.1.1.222|2020-12-17	USA	WY-WPHL-20167597	EPI_ISL_1373427	B.1.1.222	2020-12-17
USA|TX-HMH-MCoV-33521|EPI_ISL_2200828|B.1.1.222|2020-12-17	USA	TX-HMH-MCoV-33521	EPI_ISL_2200828	B.1.1.222	2020-12-17
Argentina|PAIS-G0055|EPI_ISL_1395970|B.1.1.222|2020-12-17	Argentina	PAIS-G0055	EPI_ISL_1395970	B.1.1.222	2020-12-17
USA|CA-SEARCH-41115|EPI_ISL_3215782|B.1.1.222|2020-12-17	USA	CA-SEARCH-41115	EPI_ISL_3215782	B.1.1.222	2020-12-17
USA|CA-SEARCH-5374|EPI_ISL_755186|B.1.1.222|2020-12-17	USA	CA-SEARCH-5374	EPI_ISL_755186	B.1.1.222	2020-12-17
USA|CA-CDPH-UC607|EPI_ISL_847625|B.1.1.222|2020-12-17	USA	CA-CDPH-UC607	EPI_ISL_847625	B.1.1.222	2020-12-17
USA|CA-CDPH-UC606|EPI_ISL_847624|B.1.1.222|2020-12-17	USA	CA-CDPH-UC606	EPI_ISL_847624	B.1.1.222	2020-12-17
USA|TX-HMH-MCoV-32257|EPI_ISL_2190891|B.1.1.222|2020-12-17	USA	TX-HMH-MCoV-32257	EPI_ISL_2190891	B.1.1.222	2020-12-17
USA|NC-UNCC-000356|EPI_ISL_1938160|B.1.1.222|2020-12-17	USA	NC-UNCC-000356	EPI_ISL_1938160	B.1.1.222	2020-12-17
USA|CA-SEARCH-12041|EPI_ISL_1812261|B.1.1.222|2020-12-17	USA	CA-SEARCH-12041	EPI_ISL_1812261	B.1.1.222	2020-12-17
Mexico|CMX-INER-IBT-0682|EPI_ISL_4496636|B.1.1.222|2020-12-18	Mexico	CMX-INER-IBT-0682	EPI_ISL_4496636	B.1.1.222	2020-12-18
USA|CA-CZB-23883|EPI_ISL_1185311|B.1.1.222|2020-12-18	USA	CA-CZB-23883	EPI_ISL_1185311	B.1.1.222	2020-12-18
USA|NY-NYCPHL-001858|EPI_ISL_832290|B.1.1.222|2020-12-18	USA	NY-NYCPHL-001858	EPI_ISL_832290	B.1.1.222	2020-12-18
USA|TX-HMH-MCoV-33059|EPI_ISL_2191704|B.1.1.222|2020-12-18	USA	TX-HMH-MCoV-33059	EPI_ISL_2191704	B.1.1.222	2020-12-18
USA|CA-CDPH-UC1324|EPI_ISL_977878|B.1.1.222|2020-12-18	USA	CA-CDPH-UC1324	EPI_ISL_977878	B.1.1.222	2020-12-18
USA|FL-BPHL-3063|EPI_ISL_1097405|B.1.1.222|2020-12-18	USA	FL-BPHL-3063	EPI_ISL_1097405	B.1.1.222	2020-12-18
USA|TX-HMH-MCoV-32666|EPI_ISL_2191300|B.1.1.222|2020-12-18	USA	TX-HMH-MCoV-32666	EPI_ISL_2191300	B.1.1.222	2020-12-18
USA|CA-CDPH-UC1230|EPI_ISL_978978|B.1.1.222|2020-12-18	USA	CA-CDPH-UC1230	EPI_ISL_978978	B.1.1.222	2020-12-18
USA|CA-CDPH-UC1268|EPI_ISL_978981|B.1.1.222|2020-12-18	USA	CA-CDPH-UC1268	EPI_ISL_978981	B.1.1.222	2020-12-18
USA|CA-CDPH-UC1259|EPI_ISL_978979|B.1.1.222|2020-12-18	USA	CA-CDPH-UC1259	EPI_ISL_978979	B.1.1.222	2020-12-18
USA|TX-HMH-MCoV-32313|EPI_ISL_2190947|B.1.1.222|2020-12-18	USA	TX-HMH-MCoV-32313	EPI_ISL_2190947	B.1.1.222	2020-12-18
USA|TX-HMH-MCoV-32252|EPI_ISL_2190886|B.1.1.222|2020-12-18	USA	TX-HMH-MCoV-32252	EPI_ISL_2190886	B.1.1.222	2020-12-18
USA|TN-VUMC-000683|EPI_ISL_5780365|B.1.1.222|2020-12-19	USA	TN-VUMC-000683	EPI_ISL_5780365	B.1.1.222	2020-12-19
USA|TX-HMH-MCoV-32366|EPI_ISL_2191000|B.1.1.222|2020-12-19	USA	TX-HMH-MCoV-32366	EPI_ISL_2191000	B.1.1.222	2020-12-19
USA|IL-NM-4804|EPI_ISL_936669|B.1.1.222|2020-12-19	USA	IL-NM-4804	EPI_ISL_936669	B.1.1.222	2020-12-19
USA|CA-SEARCH-101009|EPI_ISL_2329385|B.1.1.222|2020-12-19	USA	CA-SEARCH-101009	EPI_ISL_2329385	B.1.1.222	2020-12-19
South_Korea|KDCA3639|EPI_ISL_2161132|B.1.1.222|2020-12-19	South_Korea	KDCA3639	EPI_ISL_2161132	B.1.1.222	2020-12-19
South_Korea|KDCA3640|EPI_ISL_2161133|B.1.1.222|2020-12-19	South_Korea	KDCA3640	EPI_ISL_2161133	B.1.1.222	2020-12-19
Mexico|CMX-INMEGEN-02-05-04|EPI_ISL_1060612|B.1.1.222|2020-12-20	Mexico	CMX-INMEGEN-02-05-04	EPI_ISL_1060612	B.1.1.222	2020-12-20
USA|TX-HMH-MCoV-32344|EPI_ISL_2190978|B.1.1.222|2020-12-20	USA	TX-HMH-MCoV-32344	EPI_ISL_2190978	B.1.1.222	2020-12-20
USA|CA-LACPHL-AF00045|EPI_ISL_765992|B.1.1.222|2020-12-20	USA	CA-LACPHL-AF00045	EPI_ISL_765992	B.1.1.222	2020-12-20
USA|TX-HMH-MCoV-30505|EPI_ISL_1305058|B.1.1.222|2020-12-20	USA	TX-HMH-MCoV-30505	EPI_ISL_1305058	B.1.1.222	2020-12-20
USA|WA-UW-48223|EPI_ISL_824894|B.1.1.222|2020-12-20	USA	WA-UW-48223	EPI_ISL_824894	B.1.1.222	2020-12-20
USA|TX-HMH-MCoV-32249|EPI_ISL_2190883|B.1.1.222|2020-12-20	USA	TX-HMH-MCoV-32249	EPI_ISL_2190883	B.1.1.222	2020-12-20
USA|CA-SEARCH-14227|EPI_ISL_1813040|B.1.1.222|2020-12-20	USA	CA-SEARCH-14227	EPI_ISL_1813040	B.1.1.222	2020-12-20
USA|TX-HMH-MCoV-30497|EPI_ISL_1305050|B.1.1.222|2020-12-20	USA	TX-HMH-MCoV-30497	EPI_ISL_1305050	B.1.1.222	2020-12-20
USA|CA-UCSF-UC701|EPI_ISL_855400|B.1.1.222|2020-12-20	USA	CA-UCSF-UC701	EPI_ISL_855400	B.1.1.222	2020-12-20
USA|NY-UB-00417|EPI_ISL_1009521|B.1.1.222|2020-12-20	USA	NY-UB-00417	EPI_ISL_1009521	B.1.1.222	2020-12-20
USA|CA-CZB-24831|EPI_ISL_1235598|B.1.1.222|2020-12-20	USA	CA-CZB-24831	EPI_ISL_1235598	B.1.1.222	2020-12-20
USA|CA-CZB-24829|EPI_ISL_1235524|B.1.1.222|2020-12-20	USA	CA-CZB-24829	EPI_ISL_1235524	B.1.1.222	2020-12-20
USA|CA-CZB-24828|EPI_ISL_1235505|B.1.1.222|2020-12-20	USA	CA-CZB-24828	EPI_ISL_1235505	B.1.1.222	2020-12-20
USA|CA-CZB-24832|EPI_ISL_1235503|B.1.1.222|2020-12-20	USA	CA-CZB-24832	EPI_ISL_1235503	B.1.1.222	2020-12-20
USA|CA-CZB-24833|EPI_ISL_1235532|B.1.1.222|2020-12-20	USA	CA-CZB-24833	EPI_ISL_1235532	B.1.1.222	2020-12-20
USA|CA-CZB-24823|EPI_ISL_1235499|B.1.1.222|2020-12-20	USA	CA-CZB-24823	EPI_ISL_1235499	B.1.1.222	2020-12-20
USA|CA-CZB-24827|EPI_ISL_1235580|B.1.1.222|2020-12-20	USA	CA-CZB-24827	EPI_ISL_1235580	B.1.1.222	2020-12-20
USA|CA-CZB-24825|EPI_ISL_1235497|B.1.1.222|2020-12-20	USA	CA-CZB-24825	EPI_ISL_1235497	B.1.1.222	2020-12-20
USA|CA-CSMC147|EPI_ISL_824560|B.1.1.222|2020-12-20	USA	CA-CSMC147	EPI_ISL_824560	B.1.1.222	2020-12-20
USA|CA-LACPHL-AF00057|EPI_ISL_754132|B.1.1.222|2020-12-20	USA	CA-LACPHL-AF00057	EPI_ISL_754132	B.1.1.222	2020-12-20
Mexico|CMX-INMEGEN-12-04-04|EPI_ISL_1005562|B.1.1.222|2020-12-21	Mexico	CMX-INMEGEN-12-04-04	EPI_ISL_1005562	B.1.1.222	2020-12-21
Mexico|MEX-InDRE_200|EPI_ISL_933677|B.1.1.222|2020-12-21	Mexico	MEX-InDRE_200	EPI_ISL_933677	B.1.1.222	2020-12-21
Canada|QC-1nDJXP-0046535239|EPI_ISL_2822061|B.1.1.222|2020-12-21	Canada	QC-1nDJXP-0046535239	EPI_ISL_2822061	B.1.1.222	2020-12-21
Mexico|CMX-INER-IBT-0716|EPI_ISL_4496670|B.1.1.222|2020-12-21	Mexico	CMX-INER-IBT-0716	EPI_ISL_4496670	B.1.1.222	2020-12-21
Mexico|CMX-INER-IBT-0724|EPI_ISL_4496678|B.1.1.222|2020-12-21	Mexico	CMX-INER-IBT-0724	EPI_ISL_4496678	B.1.1.222	2020-12-21
USA|TX-HMH-MCoV-31884|EPI_ISL_2190520|B.1.1.222|2020-12-21	USA	TX-HMH-MCoV-31884	EPI_ISL_2190520	B.1.1.222	2020-12-21
USA|TX-HMH-MCoV-31971|EPI_ISL_2190607|B.1.1.222|2020-12-21	USA	TX-HMH-MCoV-31971	EPI_ISL_2190607	B.1.1.222	2020-12-21
USA|PA-MGEL-01352|EPI_ISL_2775698|B.1.1.222|2020-12-21	USA	PA-MGEL-01352	EPI_ISL_2775698	B.1.1.222	2020-12-21
Argentina|PAIS-G0059|EPI_ISL_1395989|B.1.1.222|2020-12-21	Argentina	PAIS-G0059	EPI_ISL_1395989	B.1.1.222	2020-12-21
USA|CA-ALSR-6140|EPI_ISL_880184|B.1.1.222|2020-12-21	USA	CA-ALSR-6140	EPI_ISL_880184	B.1.1.222	2020-12-21
Mexico|CMX-INER-IBT-0720|EPI_ISL_4496674|B.1.1.222|2020-12-21	Mexico	CMX-INER-IBT-0720	EPI_ISL_4496674	B.1.1.222	2020-12-21
Mexico|CMX-InDRE_199|EPI_ISL_933676|B.1.1.222|2020-12-21	Mexico	CMX-InDRE_199	EPI_ISL_933676	B.1.1.222	2020-12-21
Mexico|SEARCH-100820|EPI_ISL_2329245|B.1.1.222|2020-12-21	Mexico	SEARCH-100820	EPI_ISL_2329245	B.1.1.222	2020-12-21
USA|MD-CDC-2-3859253|EPI_ISL_1095326|B.1.1.222|2020-12-21	USA	MD-CDC-2-3859253	EPI_ISL_1095326	B.1.1.222	2020-12-21
USA|NY-PRL-2021_0611_52M19|EPI_ISL_2633411|B.1.1.222|2020-12-21	USA	NY-PRL-2021_0611_52M19	EPI_ISL_2633411	B.1.1.222	2020-12-21
USA|NV-NSPHL-NV2061599|EPI_ISL_1136898|B.1.1.222|2020-12-21	USA	NV-NSPHL-NV2061599	EPI_ISL_1136898	B.1.1.222	2020-12-21
USA|CA-CDPH324|EPI_ISL_2233916|B.1.1.222|2020-12-21	USA	CA-CDPH324	EPI_ISL_2233916	B.1.1.222	2020-12-21
USA|CA-CDPH-UC643|EPI_ISL_847776|B.1.1.222|2020-12-21	USA	CA-CDPH-UC643	EPI_ISL_847776	B.1.1.222	2020-12-21
USA|CA-CDPH-UC637|EPI_ISL_847774|B.1.1.222|2020-12-21	USA	CA-CDPH-UC637	EPI_ISL_847774	B.1.1.222	2020-12-21
USA|CO-CDPHE-2100145295|EPI_ISL_2310953|B.1.1.222|2020-12-21	USA	CO-CDPHE-2100145295	EPI_ISL_2310953	B.1.1.222	2020-12-21
USA|NY-UB-00416|EPI_ISL_1009527|B.1.1.222|2020-12-21	USA	NY-UB-00416	EPI_ISL_1009527	B.1.1.222	2020-12-21
USA|CA-PROV-882|EPI_ISL_1017146|B.1.1.222|2020-12-21	USA	CA-PROV-882	EPI_ISL_1017146	B.1.1.222	2020-12-21
USA|CA-CZB-24866|EPI_ISL_1235504|B.1.1.222|2020-12-21	USA	CA-CZB-24866	EPI_ISL_1235504	B.1.1.222	2020-12-21
USA|CA-CZB-24839|EPI_ISL_1235512|B.1.1.222|2020-12-21	USA	CA-CZB-24839	EPI_ISL_1235512	B.1.1.222	2020-12-21
USA|CA-CZB-24835|EPI_ISL_1235407|B.1.1.222|2020-12-21	USA	CA-CZB-24835	EPI_ISL_1235407	B.1.1.222	2020-12-21
USA|CA-CZB-24838|EPI_ISL_1235520|B.1.1.222|2020-12-21	USA	CA-CZB-24838	EPI_ISL_1235520	B.1.1.222	2020-12-21
USA|CA-CZB-24853|EPI_ISL_1235605|B.1.1.222|2020-12-21	USA	CA-CZB-24853	EPI_ISL_1235605	B.1.1.222	2020-12-21
USA|CA-CZB-24862|EPI_ISL_1235387|B.1.1.222|2020-12-21	USA	CA-CZB-24862	EPI_ISL_1235387	B.1.1.222	2020-12-21
USA|CA-CZB-24855|EPI_ISL_1235359|B.1.1.222|2020-12-21	USA	CA-CZB-24855	EPI_ISL_1235359	B.1.1.222	2020-12-21
USA|CA-CZB-24864|EPI_ISL_1235380|B.1.1.222|2020-12-21	USA	CA-CZB-24864	EPI_ISL_1235380	B.1.1.222	2020-12-21
USA|CA-CZB-24857|EPI_ISL_1235562|B.1.1.222|2020-12-21	USA	CA-CZB-24857	EPI_ISL_1235562	B.1.1.222	2020-12-21
USA|CA-CZB-24869|EPI_ISL_1235537|B.1.1.222|2020-12-21	USA	CA-CZB-24869	EPI_ISL_1235537	B.1.1.222	2020-12-21
USA|CA-CZB-24846|EPI_ISL_1235543|B.1.1.222|2020-12-21	USA	CA-CZB-24846	EPI_ISL_1235543	B.1.1.222	2020-12-21
USA|CA-CZB-24865|EPI_ISL_1235592|B.1.1.222|2020-12-21	USA	CA-CZB-24865	EPI_ISL_1235592	B.1.1.222	2020-12-21
USA|CA-CZB-24854|EPI_ISL_1235406|B.1.1.222|2020-12-21	USA	CA-CZB-24854	EPI_ISL_1235406	B.1.1.222	2020-12-21
USA|CA-CZB-24860|EPI_ISL_1235459|B.1.1.222|2020-12-21	USA	CA-CZB-24860	EPI_ISL_1235459	B.1.1.222	2020-12-21
USA|CA-CZB-24840|EPI_ISL_1235599|B.1.1.222|2020-12-21	USA	CA-CZB-24840	EPI_ISL_1235599	B.1.1.222	2020-12-21
USA|CA-CZB-24849|EPI_ISL_1235495|B.1.1.222|2020-12-21	USA	CA-CZB-24849	EPI_ISL_1235495	B.1.1.222	2020-12-21
USA|CA-CZB-24861|EPI_ISL_1235448|B.1.1.222|2020-12-21	USA	CA-CZB-24861	EPI_ISL_1235448	B.1.1.222	2020-12-21
USA|CA-CZB-24858|EPI_ISL_1235552|B.1.1.222|2020-12-21	USA	CA-CZB-24858	EPI_ISL_1235552	B.1.1.222	2020-12-21
USA|CA-CZB-24836|EPI_ISL_1235579|B.1.1.222|2020-12-21	USA	CA-CZB-24836	EPI_ISL_1235579	B.1.1.222	2020-12-21
USA|CA-CZB-24868|EPI_ISL_1235564|B.1.1.222|2020-12-21	USA	CA-CZB-24868	EPI_ISL_1235564	B.1.1.222	2020-12-21
USA|CA-CZB-24841|EPI_ISL_1235485|B.1.1.222|2020-12-21	USA	CA-CZB-24841	EPI_ISL_1235485	B.1.1.222	2020-12-21
USA|CA-CZB-24856|EPI_ISL_1235486|B.1.1.222|2020-12-21	USA	CA-CZB-24856	EPI_ISL_1235486	B.1.1.222	2020-12-21
USA|CA-CZB-24859|EPI_ISL_1235586|B.1.1.222|2020-12-21	USA	CA-CZB-24859	EPI_ISL_1235586	B.1.1.222	2020-12-21
USA|CA-CZB-24842|EPI_ISL_1235492|B.1.1.222|2020-12-21	USA	CA-CZB-24842	EPI_ISL_1235492	B.1.1.222	2020-12-21
USA|CA-CZB-24863|EPI_ISL_1235392|B.1.1.222|2020-12-21	USA	CA-CZB-24863	EPI_ISL_1235392	B.1.1.222	2020-12-21
Mexico|CMX-INMEGEN-12-04-06|EPI_ISL_1005564|B.1.1.222|2020-12-21	Mexico	CMX-INMEGEN-12-04-06	EPI_ISL_1005564	B.1.1.222	2020-12-21
Mexico|CMX-INER-IBT-0723|EPI_ISL_4496677|B.1.1.222|2020-12-21	Mexico	CMX-INER-IBT-0723	EPI_ISL_4496677	B.1.1.222	2020-12-21
Italy|FVG-ASUGI-152122|EPI_ISL_804053|B.1.258.24|2020-12-21	Italy	FVG-ASUGI-152122	EPI_ISL_804053	B.1.258.24	2020-12-21
USA|WY-WPHL-20169497|EPI_ISL_1406709|B.1.1.222|2020-12-22	USA	WY-WPHL-20169497	EPI_ISL_1406709	B.1.1.222	2020-12-22
Mexico|CMX-INMEGEN-12-04-15|EPI_ISL_1005573|B.1.1.222|2020-12-22	Mexico	CMX-INMEGEN-12-04-15	EPI_ISL_1005573	B.1.1.222	2020-12-22
Mexico|CMX-INMEGEN-12-04-16|EPI_ISL_1005574|B.1.1.222|2020-12-22	Mexico	CMX-INMEGEN-12-04-16	EPI_ISL_1005574	B.1.1.222	2020-12-22
USA|NY-PRL-2021_0611_52O23|EPI_ISL_2632944|B.1.1.222|2020-12-22	USA	NY-PRL-2021_0611_52O23	EPI_ISL_2632944	B.1.1.222	2020-12-22
USA|TX-HMH-MCoV-33541|EPI_ISL_2200848|B.1.1.222|2020-12-22	USA	TX-HMH-MCoV-33541	EPI_ISL_2200848	B.1.1.222	2020-12-22
USA|CA-ALSR-8508|EPI_ISL_1531968|B.1.1.222|2020-12-22	USA	CA-ALSR-8508	EPI_ISL_1531968	B.1.1.222	2020-12-22
USA|CA-CDPH-UC1618|EPI_ISL_984585|B.1.1.222|2020-12-22	USA	CA-CDPH-UC1618	EPI_ISL_984585	B.1.1.222	2020-12-22
USA|CA-UCSF-UC869|EPI_ISL_978959|B.1.1.222|2020-12-22	USA	CA-UCSF-UC869	EPI_ISL_978959	B.1.1.222	2020-12-22
Mexico|SEARCH-100833|EPI_ISL_2329256|B.1.1.222|2020-12-22	Mexico	SEARCH-100833	EPI_ISL_2329256	B.1.1.222	2020-12-22
USA|TX-9210074459|EPI_ISL_2009472|B.1.1.222|2020-12-22	USA	TX-9210074459	EPI_ISL_2009472	B.1.1.222	2020-12-22
USA|NY-Wadsworth-21003163-01|EPI_ISL_861144|B.1.1.222|2020-12-22	USA	NY-Wadsworth-21003163-01	EPI_ISL_861144	B.1.1.222	2020-12-22
USA|IL-NM-5054|EPI_ISL_936727|B.1.1.222|2020-12-22	USA	IL-NM-5054	EPI_ISL_936727	B.1.1.222	2020-12-22
USA|CA-CZB-29487|EPI_ISL_1701080|B.1.1.222|2020-12-22	USA	CA-CZB-29487	EPI_ISL_1701080	B.1.1.222	2020-12-22
USA|TX-HMH-MCoV-31512|EPI_ISL_2190148|B.1.1.222|2020-12-23	USA	TX-HMH-MCoV-31512	EPI_ISL_2190148	B.1.1.222	2020-12-23
USA|CA-SEARCH-9814|EPI_ISL_1969624|B.1.1.222|2020-12-23	USA	CA-SEARCH-9814	EPI_ISL_1969624	B.1.1.222	2020-12-23
USA|NY-NYCPHL-001926|EPI_ISL_832327|B.1.1.222|2020-12-23	USA	NY-NYCPHL-001926	EPI_ISL_832327	B.1.1.222	2020-12-23
USA|MD-HP12138|EPI_ISL_791448|B.1.1.222|2020-12-23	USA	MD-HP12138	EPI_ISL_791448	B.1.1.222	2020-12-23
USA|CA-SEARCH-9024|EPI_ISL_1794811|B.1.1.222|2020-12-23	USA	CA-SEARCH-9024	EPI_ISL_1794811	B.1.1.222	2020-12-23
USA|AZ-ASPHL-3242|EPI_ISL_1015726|B.1.1.222|2020-12-23	USA	AZ-ASPHL-3242	EPI_ISL_1015726	B.1.1.222	2020-12-23
USA|TX-HMH-MCoV-31522|EPI_ISL_2190158|B.1.1.222|2020-12-23	USA	TX-HMH-MCoV-31522	EPI_ISL_2190158	B.1.1.222	2020-12-23
USA|TX-HMH-MCoV-30463|EPI_ISL_1305016|B.1.1.222|2020-12-23	USA	TX-HMH-MCoV-30463	EPI_ISL_1305016	B.1.1.222	2020-12-23
Mexico|CMX-INMEGEN-12-04-18|EPI_ISL_1005576|B.1.1.222|2020-12-23	Mexico	CMX-INMEGEN-12-04-18	EPI_ISL_1005576	B.1.1.222	2020-12-23
Canada|BC-BCCDC-9908|EPI_ISL_976734|B.1.1.222|2020-12-23	Canada	BC-BCCDC-9908	EPI_ISL_976734	B.1.1.222	2020-12-23
Israel|CVL-55|EPI_ISL_944450|B.1.1.222|2020-12-24	Israel	CVL-55	EPI_ISL_944450	B.1.1.222	2020-12-24
Canada|BC-BCCDC-9909|EPI_ISL_976749|B.1.1.222|2020-12-24	Canada	BC-BCCDC-9909	EPI_ISL_976749	B.1.1.222	2020-12-24
USA|WY-WPHL-20170417|EPI_ISL_1443632|B.1.1.222|2020-12-24	USA	WY-WPHL-20170417	EPI_ISL_1443632	B.1.1.222	2020-12-24
USA|NY-NYCPHL-001954|EPI_ISL_832348|B.1.1.222|2020-12-24	USA	NY-NYCPHL-001954	EPI_ISL_832348	B.1.1.222	2020-12-24
USA|TX-HMH-MCoV-31422|EPI_ISL_2190026|B.1.1.222|2020-12-24	USA	TX-HMH-MCoV-31422	EPI_ISL_2190026	B.1.1.222	2020-12-24
USA|TX-HMH-MCoV-32704|EPI_ISL_2191338|B.1.1.222|2020-12-24	USA	TX-HMH-MCoV-32704	EPI_ISL_2191338	B.1.1.222	2020-12-24
USA|TX-HMH-MCoV-31410|EPI_ISL_2190014|B.1.1.222|2020-12-24	USA	TX-HMH-MCoV-31410	EPI_ISL_2190014	B.1.1.222	2020-12-24
USA|NY-Wadsworth-21003587-01|EPI_ISL_830230|B.1.1.222|2020-12-24	USA	NY-Wadsworth-21003587-01	EPI_ISL_830230	B.1.1.222	2020-12-24
USA|MD-NIH-00091|EPI_ISL_1306175|B.1.1.222|2020-12-24	USA	MD-NIH-00091	EPI_ISL_1306175	B.1.1.222	2020-12-24
USA|OR-OHSU-8576|EPI_ISL_2839033|B.1.1.222|2020-12-24	USA	OR-OHSU-8576	EPI_ISL_2839033	B.1.1.222	2020-12-24
USA|CA-SEARCH-8993|EPI_ISL_1794788|B.1.1.222|2020-12-24	USA	CA-SEARCH-8993	EPI_ISL_1794788	B.1.1.222	2020-12-24
USA|NY-PRL-2021_0614_52K16|EPI_ISL_2634250|B.1.1.222|2020-12-24	USA	NY-PRL-2021_0614_52K16	EPI_ISL_2634250	B.1.1.222	2020-12-24
USA|CO-CDPHE-2100155441|EPI_ISL_983858|B.1.1.222|2020-12-24	USA	CO-CDPHE-2100155441	EPI_ISL_983858	B.1.1.222	2020-12-24
USA|CA-CZB-29535|EPI_ISL_1701155|B.1.1.222|2020-12-24	USA	CA-CZB-29535	EPI_ISL_1701155	B.1.1.222	2020-12-24
USA|CA-CZB-29534|EPI_ISL_1701175|B.1.1.222|2020-12-24	USA	CA-CZB-29534	EPI_ISL_1701175	B.1.1.222	2020-12-24
USA|GA-CDC-LC0002026|EPI_ISL_1029710|B.1.1.222|2020-12-24	USA	GA-CDC-LC0002026	EPI_ISL_1029710	B.1.1.222	2020-12-24
Switzerland|BS-ETHZ-430027|EPI_ISL_796432|B.1.160.19|2020-12-25	Switzerland	BS-ETHZ-430027	EPI_ISL_796432	B.1.160.19	2020-12-25
Belize|BZ-CML-TCMC-BZ030-1220|EPI_ISL_1822779|B.1.1.222|2020-12-26	Belize	BZ-CML-TCMC-BZ030-1220	EPI_ISL_1822779	B.1.1.222	2020-12-26
USA|TX-HHD-2102027412|EPI_ISL_935705|B.1.1.222|2020-12-26	USA	TX-HHD-2102027412	EPI_ISL_935705	B.1.1.222	2020-12-26
USA|un-HHD-4477412|EPI_ISL_956349|B.1.1.222|2020-12-26	USA	un-HHD-4477412	EPI_ISL_956349	B.1.1.222	2020-12-26
USA|NY-PRL-2020_1229_00E09|EPI_ISL_984784|B.1.1.222|2020-12-26	USA	NY-PRL-2020_1229_00E09	EPI_ISL_984784	B.1.1.222	2020-12-26
USA|TN-VUMC-000138|EPI_ISL_3726058|B.1.1.222|2020-12-26	USA	TN-VUMC-000138	EPI_ISL_3726058	B.1.1.222	2020-12-26
USA|TN-VUMC-000147|EPI_ISL_3726039|B.1.1.222|2020-12-26	USA	TN-VUMC-000147	EPI_ISL_3726039	B.1.1.222	2020-12-26
USA|AZ-TG745281|EPI_ISL_1183935|B.1.1.222|2020-12-26	USA	AZ-TG745281	EPI_ISL_1183935	B.1.1.222	2020-12-26
USA|IL-CDC-LC00002095|EPI_ISL_887989|B.1.1.222|2020-12-26	USA	IL-CDC-LC00002095	EPI_ISL_887989	B.1.1.222	2020-12-26
USA|IL-CDC-LC0002095|EPI_ISL_1029732|B.1.1.222|2020-12-26	USA	IL-CDC-LC0002095	EPI_ISL_1029732	B.1.1.222	2020-12-26
USA|CA-CSMC157|EPI_ISL_824570|B.1.1.222|2020-12-26	USA	CA-CSMC157	EPI_ISL_824570	B.1.1.222	2020-12-26
USA|CA-CSMC179|EPI_ISL_824590|B.1.1.222|2020-12-26	USA	CA-CSMC179	EPI_ISL_824590	B.1.1.222	2020-12-26
USA|CA-QDX-2828|EPI_ISL_803058|B.1.1.222|2020-12-26	USA	CA-QDX-2828	EPI_ISL_803058	B.1.1.222	2020-12-26
USA|NY-PRL-2021_0611_51G23|EPI_ISL_2633305|B.1.1.222|2020-12-26	USA	NY-PRL-2021_0611_51G23	EPI_ISL_2633305	B.1.1.222	2020-12-26
Mexico|CMX-INER-INMEGEN-00247|EPI_ISL_2778016|B.1.1.222|2020-12-26	Mexico	CMX-INER-INMEGEN-00247	EPI_ISL_2778016	B.1.1.222	2020-12-26
Mexico|CMX-INMEGEN-06-03-7|EPI_ISL_2842801|B.1.1.222|2020-12-26	Mexico	CMX-INMEGEN-06-03-7	EPI_ISL_2842801	B.1.1.222	2020-12-26
Mexico|CMX-INER-INMEGEN-00246|EPI_ISL_2778015|B.1.1.222|2020-12-26	Mexico	CMX-INER-INMEGEN-00246	EPI_ISL_2778015	B.1.1.222	2020-12-26
Mexico|CMX-INMEGEN-06-03-5|EPI_ISL_2842802|B.1.1.222|2020-12-26	Mexico	CMX-INMEGEN-06-03-5	EPI_ISL_2842802	B.1.1.222	2020-12-26
USA|CA-CDC-LC00001125|EPI_ISL_888454|B.1.1.222|2020-12-26	USA	CA-CDC-LC00001125	EPI_ISL_888454	B.1.1.222	2020-12-26
USA|CA-CDC-LC0001125|EPI_ISL_1029423|B.1.1.222|2020-12-26	USA	CA-CDC-LC0001125	EPI_ISL_1029423	B.1.1.222	2020-12-26
USA|CA-QDX-2760|EPI_ISL_802997|B.1.1.222|2020-12-26	USA	CA-QDX-2760	EPI_ISL_802997	B.1.1.222	2020-12-26
USA|GA-CDC-LC00001039|EPI_ISL_888247|B.1.1.222|2020-12-26	USA	GA-CDC-LC00001039	EPI_ISL_888247	B.1.1.222	2020-12-26
USA|GA-CDC-LC0001039|EPI_ISL_1029394|B.1.1.222|2020-12-26	USA	GA-CDC-LC0001039	EPI_ISL_1029394	B.1.1.222	2020-12-26
USA|WY-WPHL-20170843|EPI_ISL_1593598|B.1.1.222|2020-12-27	USA	WY-WPHL-20170843	EPI_ISL_1593598	B.1.1.222	2020-12-27
USA|TX-HMH-MCoV-33080|EPI_ISL_2191725|B.1.1.222|2020-12-27	USA	TX-HMH-MCoV-33080	EPI_ISL_2191725	B.1.1.222	2020-12-27
USA|WV-CDC-LC0001430|EPI_ISL_4964003|B.1.1.222|2020-12-27	USA	WV-CDC-LC0001430	EPI_ISL_4964003	B.1.1.222	2020-12-27
USA|CO-CDPHE-2100161366|EPI_ISL_2310969|B.1.1.222|2020-12-27	USA	CO-CDPHE-2100161366	EPI_ISL_2310969	B.1.1.222	2020-12-27
USA|MD-HP12134|EPI_ISL_791444|B.1.1.222|2020-12-27	USA	MD-HP12134	EPI_ISL_791444	B.1.1.222	2020-12-27
USA|CA-CZB-29604|EPI_ISL_1701622|B.1.1.222|2020-12-27	USA	CA-CZB-29604	EPI_ISL_1701622	B.1.1.222	2020-12-27
USA|CA-CZB-29595|EPI_ISL_1701529|B.1.1.222|2020-12-27	USA	CA-CZB-29595	EPI_ISL_1701529	B.1.1.222	2020-12-27
USA|CA-CZB-29582|EPI_ISL_1701512|B.1.1.222|2020-12-27	USA	CA-CZB-29582	EPI_ISL_1701512	B.1.1.222	2020-12-27
USA|CA-CZB-29601|EPI_ISL_1701417|B.1.1.222|2020-12-27	USA	CA-CZB-29601	EPI_ISL_1701417	B.1.1.222	2020-12-27
USA|CA-CZB-29592|EPI_ISL_1701642|B.1.1.222|2020-12-27	USA	CA-CZB-29592	EPI_ISL_1701642	B.1.1.222	2020-12-27
USA|CA-CZB-29598|EPI_ISL_1701650|B.1.1.222|2020-12-27	USA	CA-CZB-29598	EPI_ISL_1701650	B.1.1.222	2020-12-27
USA|CA-CZB-29597|EPI_ISL_1701635|B.1.1.222|2020-12-27	USA	CA-CZB-29597	EPI_ISL_1701635	B.1.1.222	2020-12-27
USA|CA-CZB-29596|EPI_ISL_1701556|B.1.1.222|2020-12-27	USA	CA-CZB-29596	EPI_ISL_1701556	B.1.1.222	2020-12-27
USA|CA-CZB-29590|EPI_ISL_1701449|B.1.1.222|2020-12-27	USA	CA-CZB-29590	EPI_ISL_1701449	B.1.1.222	2020-12-27
USA|CA-CZB-29591|EPI_ISL_1701576|B.1.1.222|2020-12-27	USA	CA-CZB-29591	EPI_ISL_1701576	B.1.1.222	2020-12-27
USA|CA-CZB-29577|EPI_ISL_1701424|B.1.1.222|2020-12-27	USA	CA-CZB-29577	EPI_ISL_1701424	B.1.1.222	2020-12-27
USA|CA-CZB-29581|EPI_ISL_1701434|B.1.1.222|2020-12-27	USA	CA-CZB-29581	EPI_ISL_1701434	B.1.1.222	2020-12-27
USA|CA-CZB-29583|EPI_ISL_1701552|B.1.1.222|2020-12-27	USA	CA-CZB-29583	EPI_ISL_1701552	B.1.1.222	2020-12-27
USA|CA-CZB-29585|EPI_ISL_1701553|B.1.1.222|2020-12-27	USA	CA-CZB-29585	EPI_ISL_1701553	B.1.1.222	2020-12-27
USA|CA-CZB-29580|EPI_ISL_1701535|B.1.1.222|2020-12-27	USA	CA-CZB-29580	EPI_ISL_1701535	B.1.1.222	2020-12-27
USA|CA-CZB-29589|EPI_ISL_1701652|B.1.1.222|2020-12-27	USA	CA-CZB-29589	EPI_ISL_1701652	B.1.1.222	2020-12-27
USA|CA-CZB-29588|EPI_ISL_1701633|B.1.1.222|2020-12-27	USA	CA-CZB-29588	EPI_ISL_1701633	B.1.1.222	2020-12-27
USA|CA-CZB-19401|EPI_ISL_955389|B.1.1.222|2020-12-27	USA	CA-CZB-19401	EPI_ISL_955389	B.1.1.222	2020-12-27
USA|CA-CZB-29600|EPI_ISL_1701421|B.1.1.222|2020-12-27	USA	CA-CZB-29600	EPI_ISL_1701421	B.1.1.222	2020-12-27
USA|CA-CZB-29578|EPI_ISL_1701432|B.1.1.222|2020-12-27	USA	CA-CZB-29578	EPI_ISL_1701432	B.1.1.222	2020-12-27
USA|CA-CZB-29593|EPI_ISL_1701506|B.1.1.222|2020-12-27	USA	CA-CZB-29593	EPI_ISL_1701506	B.1.1.222	2020-12-27
USA|CA-CZB-29607|EPI_ISL_1701409|B.1.1.222|2020-12-27	USA	CA-CZB-29607	EPI_ISL_1701409	B.1.1.222	2020-12-27
USA|CA-CZB-29594|EPI_ISL_1701442|B.1.1.222|2020-12-27	USA	CA-CZB-29594	EPI_ISL_1701442	B.1.1.222	2020-12-27
USA|CA-CZB-29606|EPI_ISL_1701651|B.1.1.222|2020-12-27	USA	CA-CZB-29606	EPI_ISL_1701651	B.1.1.222	2020-12-27
USA|CA-CZB-29603|EPI_ISL_1701415|B.1.1.222|2020-12-27	USA	CA-CZB-29603	EPI_ISL_1701415	B.1.1.222	2020-12-27
USA|CA-CZB-29602|EPI_ISL_1701610|B.1.1.222|2020-12-27	USA	CA-CZB-29602	EPI_ISL_1701610	B.1.1.222	2020-12-27
USA|TX-HMH-MCoV-36742|EPI_ISL_2207583|B.1.1.222|2020-12-28	USA	TX-HMH-MCoV-36742	EPI_ISL_2207583	B.1.1.222	2020-12-28
USA|WY-WYPHL20171163|EPI_ISL_1857401|B.1.1.222|2020-12-28	USA	WY-WYPHL20171163	EPI_ISL_1857401	B.1.1.222	2020-12-28
USA|WY-WPHL-20171105|EPI_ISL_1182627|B.1.1.222|2020-12-28	USA	WY-WPHL-20171105	EPI_ISL_1182627	B.1.1.222	2020-12-28
USA|WY-WPHL-20171451|EPI_ISL_1182635|B.1.1.222|2020-12-28	USA	WY-WPHL-20171451	EPI_ISL_1182635	B.1.1.222	2020-12-28
USA|WY-WPHL-20171364|EPI_ISL_1647903|B.1.1.222|2020-12-28	USA	WY-WPHL-20171364	EPI_ISL_1647903	B.1.1.222	2020-12-28
USA|TX-HMH-MCoV-22774|EPI_ISL_1077302|B.1.1.222|2020-12-28	USA	TX-HMH-MCoV-22774	EPI_ISL_1077302	B.1.1.222	2020-12-28
USA|WA-UW-50982|EPI_ISL_837546|B.1.1.222|2020-12-28	USA	WA-UW-50982	EPI_ISL_837546	B.1.1.222	2020-12-28
USA|CA-ALSR-5978|EPI_ISL_878779|B.1.1.222|2020-12-28	USA	CA-ALSR-5978	EPI_ISL_878779	B.1.1.222	2020-12-28
USA|TX-HMH-MCoV-33794|EPI_ISL_2201816|B.1.1.222|2020-12-28	USA	TX-HMH-MCoV-33794	EPI_ISL_2201816	B.1.1.222	2020-12-28
USA|MD-CDC-2-4068590|EPI_ISL_903967|B.1.1.222|2020-12-28	USA	MD-CDC-2-4068590	EPI_ISL_903967	B.1.1.222	2020-12-28
USA|MD-MDH-0741|EPI_ISL_931471|B.1.1.222|2020-12-28	USA	MD-MDH-0741	EPI_ISL_931471	B.1.1.222	2020-12-28
USA|MD-CDC-2-4084930|EPI_ISL_1516335|B.1.1.222|2020-12-28	USA	MD-CDC-2-4084930	EPI_ISL_1516335	B.1.1.222	2020-12-28
USA|MD-CDC-2-4084912|EPI_ISL_1516326|B.1.1.222|2020-12-28	USA	MD-CDC-2-4084912	EPI_ISL_1516326	B.1.1.222	2020-12-28
USA|VA-CDC-LC0001516|EPI_ISL_4965431|B.1.1.222|2020-12-28	USA	VA-CDC-LC0001516	EPI_ISL_4965431	B.1.1.222	2020-12-28
USA|CA-QDX-3119|EPI_ISL_877186|B.1.1.222|2020-12-28	USA	CA-QDX-3119	EPI_ISL_877186	B.1.1.222	2020-12-28
USA|TX-HMH-MCoV-33923|EPI_ISL_2202132|B.1.1.222|2020-12-28	USA	TX-HMH-MCoV-33923	EPI_ISL_2202132	B.1.1.222	2020-12-28
USA|CA-CZB-29573|EPI_ISL_1701647|B.1.1.222|2020-12-28	USA	CA-CZB-29573	EPI_ISL_1701647	B.1.1.222	2020-12-28
USA|CA-CZB-29574|EPI_ISL_1701427|B.1.1.222|2020-12-28	USA	CA-CZB-29574	EPI_ISL_1701427	B.1.1.222	2020-12-28
USA|CA-CZB-29631|EPI_ISL_1701655|B.1.1.222|2020-12-28	USA	CA-CZB-29631	EPI_ISL_1701655	B.1.1.222	2020-12-28
USA|CA-CZB-29619|EPI_ISL_1701453|B.1.1.222|2020-12-28	USA	CA-CZB-29619	EPI_ISL_1701453	B.1.1.222	2020-12-28
USA|CA-CZB-29611|EPI_ISL_1701407|B.1.1.222|2020-12-28	USA	CA-CZB-29611	EPI_ISL_1701407	B.1.1.222	2020-12-28
USA|CA-CZB-29625|EPI_ISL_1701492|B.1.1.222|2020-12-28	USA	CA-CZB-29625	EPI_ISL_1701492	B.1.1.222	2020-12-28
USA|CA-CZB-29622|EPI_ISL_1701621|B.1.1.222|2020-12-28	USA	CA-CZB-29622	EPI_ISL_1701621	B.1.1.222	2020-12-28
USA|CA-CZB-29618|EPI_ISL_1701475|B.1.1.222|2020-12-28	USA	CA-CZB-29618	EPI_ISL_1701475	B.1.1.222	2020-12-28
USA|CA-CZB-29636|EPI_ISL_1701503|B.1.1.222|2020-12-28	USA	CA-CZB-29636	EPI_ISL_1701503	B.1.1.222	2020-12-28
USA|CA-CZB-29635|EPI_ISL_2658568|B.1.1.222|2020-12-28	USA	CA-CZB-29635	EPI_ISL_2658568	B.1.1.222	2020-12-28
USA|CA-CZB-29621|EPI_ISL_1701606|B.1.1.222|2020-12-28	USA	CA-CZB-29621	EPI_ISL_1701606	B.1.1.222	2020-12-28
USA|CA-CZB-29620|EPI_ISL_1701644|B.1.1.222|2020-12-28	USA	CA-CZB-29620	EPI_ISL_1701644	B.1.1.222	2020-12-28
USA|CA-CZB-29610|EPI_ISL_1701578|B.1.1.222|2020-12-28	USA	CA-CZB-29610	EPI_ISL_1701578	B.1.1.222	2020-12-28
USA|CA-CZB-29617|EPI_ISL_1701514|B.1.1.222|2020-12-28	USA	CA-CZB-29617	EPI_ISL_1701514	B.1.1.222	2020-12-28
USA|CA-CZB-29630|EPI_ISL_1701521|B.1.1.222|2020-12-28	USA	CA-CZB-29630	EPI_ISL_1701521	B.1.1.222	2020-12-28
USA|CA-CZB-29612|EPI_ISL_1701499|B.1.1.222|2020-12-28	USA	CA-CZB-29612	EPI_ISL_1701499	B.1.1.222	2020-12-28
USA|CA-CZB-29609|EPI_ISL_1701466|B.1.1.222|2020-12-28	USA	CA-CZB-29609	EPI_ISL_1701466	B.1.1.222	2020-12-28
USA|CA-CZB-29626|EPI_ISL_1701487|B.1.1.222|2020-12-28	USA	CA-CZB-29626	EPI_ISL_1701487	B.1.1.222	2020-12-28
USA|CA-CZB-29634|EPI_ISL_1701397|B.1.1.222|2020-12-28	USA	CA-CZB-29634	EPI_ISL_1701397	B.1.1.222	2020-12-28
USA|CA-CZB-29613|EPI_ISL_1701561|B.1.1.222|2020-12-28	USA	CA-CZB-29613	EPI_ISL_1701561	B.1.1.222	2020-12-28
USA|CA-CZB-29633|EPI_ISL_1701488|B.1.1.222|2020-12-28	USA	CA-CZB-29633	EPI_ISL_1701488	B.1.1.222	2020-12-28
USA|CA-CZB-29628|EPI_ISL_1701547|B.1.1.222|2020-12-28	USA	CA-CZB-29628	EPI_ISL_1701547	B.1.1.222	2020-12-28
USA|CA-CZB-29627|EPI_ISL_1701580|B.1.1.222|2020-12-28	USA	CA-CZB-29627	EPI_ISL_1701580	B.1.1.222	2020-12-28
USA|CA-CZB-29624|EPI_ISL_1701585|B.1.1.222|2020-12-28	USA	CA-CZB-29624	EPI_ISL_1701585	B.1.1.222	2020-12-28
USA|CA-CZB-29632|EPI_ISL_1701522|B.1.1.222|2020-12-28	USA	CA-CZB-29632	EPI_ISL_1701522	B.1.1.222	2020-12-28
USA|CA-CZB-29615|EPI_ISL_1701649|B.1.1.222|2020-12-28	USA	CA-CZB-29615	EPI_ISL_1701649	B.1.1.222	2020-12-28
USA|CA-CZB-29616|EPI_ISL_1701463|B.1.1.222|2020-12-28	USA	CA-CZB-29616	EPI_ISL_1701463	B.1.1.222	2020-12-28
USA|CA-CZB-29623|EPI_ISL_1701443|B.1.1.222|2020-12-28	USA	CA-CZB-29623	EPI_ISL_1701443	B.1.1.222	2020-12-28
USA|TX-9210074445|EPI_ISL_2009468|B.1.1.222|2020-12-28	USA	TX-9210074445	EPI_ISL_2009468	B.1.1.222	2020-12-28
USA|CA-CDPH-2000004992|EPI_ISL_3067100|B.1.1.222|2020-12-29	USA	CA-CDPH-2000004992	EPI_ISL_3067100	B.1.1.222	2020-12-29
USA|WY-WPHL-20171805|EPI_ISL_770453|B.1.1.222|2020-12-29	USA	WY-WPHL-20171805	EPI_ISL_770453	B.1.1.222	2020-12-29
USA|TX-HMH-MCoV-21352|EPI_ISL_1075798|B.1.1.222|2020-12-29	USA	TX-HMH-MCoV-21352	EPI_ISL_1075798	B.1.1.222	2020-12-29
USA|TX-HMH-MCoV-34104|EPI_ISL_2202655|B.1.1.222|2020-12-29	USA	TX-HMH-MCoV-34104	EPI_ISL_2202655	B.1.1.222	2020-12-29
USA|PA-MGEL-01544|EPI_ISL_2775708|B.1.1.222|2020-12-29	USA	PA-MGEL-01544	EPI_ISL_2775708	B.1.1.222	2020-12-29
USA|TX-HMH-MCoV-34216|EPI_ISL_2203030|B.1.1.222|2020-12-29	USA	TX-HMH-MCoV-34216	EPI_ISL_2203030	B.1.1.222	2020-12-29
USA|CA-CDPH-2000005130|EPI_ISL_3067099|B.1.1.222|2020-12-29	USA	CA-CDPH-2000005130	EPI_ISL_3067099	B.1.1.222	2020-12-29
USA|WA-KCL-20122915COV_18|EPI_ISL_1121042|B.1.1.222|2020-12-29	USA	WA-KCL-20122915COV_18	EPI_ISL_1121042	B.1.1.222	2020-12-29
USA|OR-KCL-20123002COV_10|EPI_ISL_1113705|B.1.1.222|2020-12-29	USA	OR-KCL-20123002COV_10	EPI_ISL_1113705	B.1.1.222	2020-12-29
USA|CA-CDPH-2000005160|EPI_ISL_3067266|B.1.1.222|2020-12-29	USA	CA-CDPH-2000005160	EPI_ISL_3067266	B.1.1.222	2020-12-29
Mexico|CMX-INMEGEN-01-02-05|EPI_ISL_985167|B.1.1.222|2020-12-29	Mexico	CMX-INMEGEN-01-02-05	EPI_ISL_985167	B.1.1.222	2020-12-29
USA|IL-LCH-0279|EPI_ISL_1501898|B.1.1.222|2020-12-29	USA	IL-LCH-0279	EPI_ISL_1501898	B.1.1.222	2020-12-29
Canada|NB-NML-3272|EPI_ISL_961578|B.1.369.1|2020-12-29	Canada	NB-NML-3272	EPI_ISL_961578	B.1.369.1	2020-12-29
USA|WY-WPHL-20172242|EPI_ISL_1593605|B.1.1.222|2020-12-30	USA	WY-WPHL-20172242	EPI_ISL_1593605	B.1.1.222	2020-12-30
USA|WY-WPHL-20172355|EPI_ISL_1023686|B.1.1.222|2020-12-30	USA	WY-WPHL-20172355	EPI_ISL_1023686	B.1.1.222	2020-12-30
USA|CA-CDPH-2000005178|EPI_ISL_3067282|B.1.1.222|2020-12-30	USA	CA-CDPH-2000005178	EPI_ISL_3067282	B.1.1.222	2020-12-30
USA|OR-OHSU-8802|EPI_ISL_2839059|B.1.1.222|2020-12-30	USA	OR-OHSU-8802	EPI_ISL_2839059	B.1.1.222	2020-12-30
USA|TX-HMH-MCoV-30306|EPI_ISL_1304859|B.1.1.222|2020-12-30	USA	TX-HMH-MCoV-30306	EPI_ISL_1304859	B.1.1.222	2020-12-30
USA|WI-UW-2519|EPI_ISL_779350|B.1.1.222|2020-12-30	USA	WI-UW-2519	EPI_ISL_779350	B.1.1.222	2020-12-30
USA|OR-OHSU-8992|EPI_ISL_3727402|B.1.1.222|2020-12-30	USA	OR-OHSU-8992	EPI_ISL_3727402	B.1.1.222	2020-12-30
USA|CA-SEARCH-103981|EPI_ISL_3215893|B.1.1.222|2020-12-30	USA	CA-SEARCH-103981	EPI_ISL_3215893	B.1.1.222	2020-12-30
USA|CA-SEARCH-103497|EPI_ISL_2920382|B.1.1.222|2020-12-30	USA	CA-SEARCH-103497	EPI_ISL_2920382	B.1.1.222	2020-12-30
USA|TX-HMH-MCoV-22731|EPI_ISL_1077259|B.1.1.222|2020-12-30	USA	TX-HMH-MCoV-22731	EPI_ISL_1077259	B.1.1.222	2020-12-30
USA|CA-SEARCH-103449|EPI_ISL_2920353|B.1.1.222|2020-12-30	USA	CA-SEARCH-103449	EPI_ISL_2920353	B.1.1.222	2020-12-30
USA|NY-PRL-2021_0614_51P10|EPI_ISL_2633905|B.1.1.222|2020-12-30	USA	NY-PRL-2021_0614_51P10	EPI_ISL_2633905	B.1.1.222	2020-12-30
USA|MN-CDC-2-4068923|EPI_ISL_1446873|B.1.1.222|2020-12-30	USA	MN-CDC-2-4068923	EPI_ISL_1446873	B.1.1.222	2020-12-30
USA|MN-MDH-2305|EPI_ISL_913695|B.1.1.222|2020-12-30	USA	MN-MDH-2305	EPI_ISL_913695	B.1.1.222	2020-12-30
USA|CO-CDPHE-2100171690|EPI_ISL_983847|B.1.1.222|2020-12-30	USA	CO-CDPHE-2100171690	EPI_ISL_983847	B.1.1.222	2020-12-30
USA|CO-CDPHE-2100173430|EPI_ISL_983849|B.1.1.222|2020-12-30	USA	CO-CDPHE-2100173430	EPI_ISL_983849	B.1.1.222	2020-12-30
USA|CO-CDPHE-2100169966|EPI_ISL_1038862|B.1.1.222|2020-12-30	USA	CO-CDPHE-2100169966	EPI_ISL_1038862	B.1.1.222	2020-12-30
Mexico|CMX-INMEGEN-01-01-15|EPI_ISL_1005665|B.1.1.222|2020-12-30	Mexico	CMX-INMEGEN-01-01-15	EPI_ISL_1005665	B.1.1.222	2020-12-30
Mexico|CMX-INMEGEN-01-01-14|EPI_ISL_1005664|B.1.1.222|2020-12-30	Mexico	CMX-INMEGEN-01-01-14	EPI_ISL_1005664	B.1.1.222	2020-12-30
USA|CA-SEARCH-101619|EPI_ISL_2422972|B.1.1.222|2020-12-31	USA	CA-SEARCH-101619	EPI_ISL_2422972	B.1.1.222	2020-12-31
USA|TX-HMH-MCoV-21170|EPI_ISL_1075614|B.1.1.222|2020-12-31	USA	TX-HMH-MCoV-21170	EPI_ISL_1075614	B.1.1.222	2020-12-31
USA|TX-HMH-MCoV-22650|EPI_ISL_1077178|B.1.1.222|2020-12-31	USA	TX-HMH-MCoV-22650	EPI_ISL_1077178	B.1.1.222	2020-12-31
USA|OR-OHSU-8897|EPI_ISL_2839081|B.1.1.222|2020-12-31	USA	OR-OHSU-8897	EPI_ISL_2839081	B.1.1.222	2020-12-31
USA|OR-OHSU-8896|EPI_ISL_905857|B.1.1.222|2020-12-31	USA	OR-OHSU-8896	EPI_ISL_905857	B.1.1.222	2020-12-31
USA|WA-UW-49492|EPI_ISL_837525|B.1.1.222|2020-12-31	USA	WA-UW-49492	EPI_ISL_837525	B.1.1.222	2020-12-31
USA|OR-OHSU-8876|EPI_ISL_3727466|B.1.1.222|2020-12-31	USA	OR-OHSU-8876	EPI_ISL_3727466	B.1.1.222	2020-12-31
USA|TX-HMH-MCoV-22673|EPI_ISL_1077201|B.1.1.222|2020-12-31	USA	TX-HMH-MCoV-22673	EPI_ISL_1077201	B.1.1.222	2020-12-31
USA|CO-CDPHE-2100178674|EPI_ISL_983840|B.1.1.222|2020-12-31	USA	CO-CDPHE-2100178674	EPI_ISL_983840	B.1.1.222	2020-12-31
USA|CO-CDPHE-2100178779|EPI_ISL_983841|B.1.1.222|2020-12-31	USA	CO-CDPHE-2100178779	EPI_ISL_983841	B.1.1.222	2020-12-31
USA|CO-CDPHE-2100178578|EPI_ISL_983839|B.1.1.222|2020-12-31	USA	CO-CDPHE-2100178578	EPI_ISL_983839	B.1.1.222	2020-12-31
USA|NY-MSHSPSP-PV25014|EPI_ISL_1708829|B.1.1.222|2020-12-31	USA	NY-MSHSPSP-PV25014	EPI_ISL_1708829	B.1.1.222	2020-12-31
USA|CA-SEARCH-101521|EPI_ISL_2422885|B.1.1.222|2021-01-01	USA	CA-SEARCH-101521	EPI_ISL_2422885	B.1.1.222	2021-01-01
Mexico|CMX-INER-IBT-0945|EPI_ISL_5194967|B.1.1.222|2021-01-01	Mexico	CMX-INER-IBT-0945	EPI_ISL_5194967	B.1.1.222	2021-01-01
USA|TX-HMH-MCoV-21023|EPI_ISL_1075467|B.1.1.222|2021-01-01	USA	TX-HMH-MCoV-21023	EPI_ISL_1075467	B.1.1.222	2021-01-01
USA|TX-HMH-MCoV-21044|EPI_ISL_1075488|B.1.1.222|2021-01-01	USA	TX-HMH-MCoV-21044	EPI_ISL_1075488	B.1.1.222	2021-01-01
Mexico|CMX-INER-IBT-0944|EPI_ISL_5194966|B.1.1.222|2021-01-01	Mexico	CMX-INER-IBT-0944	EPI_ISL_5194966	B.1.1.222	2021-01-01
USA|CA-SEARCH-101395|EPI_ISL_2422812|B.1.1.222|2021-01-01	USA	CA-SEARCH-101395	EPI_ISL_2422812	B.1.1.222	2021-01-01
USA|WA-UW-49493|EPI_ISL_837526|B.1.1.222|2021-01-01	USA	WA-UW-49493	EPI_ISL_837526	B.1.1.222	2021-01-01
USA|CA-CZB-28337|EPI_ISL_1478122|B.1.1.222|2021-01-01	USA	CA-CZB-28337	EPI_ISL_1478122	B.1.1.222	2021-01-01
USA|TX-HMH-MCoV-20886|EPI_ISL_1075329|B.1.1.222|2021-01-01	USA	TX-HMH-MCoV-20886	EPI_ISL_1075329	B.1.1.222	2021-01-01
USA|NJ-NYGC-V23|EPI_ISL_2008101|B.1.1.222|2021-01-01	USA	NJ-NYGC-V23	EPI_ISL_2008101	B.1.1.222	2021-01-01
USA|WY-WPHL-21000063|EPI_ISL_1017907|B.1.1.222|2021-01-01	USA	WY-WPHL-21000063	EPI_ISL_1017907	B.1.1.222	2021-01-01
Mexico|CMX-INMEGEN-01-01-21|EPI_ISL_1005670|B.1.1.222|2021-01-01	Mexico	CMX-INMEGEN-01-01-21	EPI_ISL_1005670	B.1.1.222	2021-01-01
Costa_Rica|INC-0217|EPI_ISL_914823|B.1.1.222|2021-01-02	Costa_Rica	INC-0217	EPI_ISL_914823	B.1.1.222	2021-01-02
USA|WY-WPHL-21000189|EPI_ISL_1060028|B.1.1.222|2021-01-02	USA	WY-WPHL-21000189	EPI_ISL_1060028	B.1.1.222	2021-01-02
USA|TX-HMH-MCoV-20122|EPI_ISL_1074561|B.1.1.222|2021-01-02	USA	TX-HMH-MCoV-20122	EPI_ISL_1074561	B.1.1.222	2021-01-02
USA|WA-UW-49499|EPI_ISL_837510|B.1.1.222|2021-01-02	USA	WA-UW-49499	EPI_ISL_837510	B.1.1.222	2021-01-02
USA|CA-CDPH-2000020591|EPI_ISL_3671772|B.1.1.222|2021-01-02	USA	CA-CDPH-2000020591	EPI_ISL_3671772	B.1.1.222	2021-01-02
USA|TX-HMH-MCoV-20119|EPI_ISL_1074558|B.1.1.222|2021-01-02	USA	TX-HMH-MCoV-20119	EPI_ISL_1074558	B.1.1.222	2021-01-02
USA|NY-PRL-2021_0614_51O06|EPI_ISL_2634125|B.1.1.222|2021-01-02	USA	NY-PRL-2021_0614_51O06	EPI_ISL_2634125	B.1.1.222	2021-01-02
USA|MT-CDC-STM-334|EPI_ISL_850570|B.1.1.222|2021-01-02	USA	MT-CDC-STM-334	EPI_ISL_850570	B.1.1.222	2021-01-02
USA|CA-ACPHD-00542|EPI_ISL_4219195|B.1.1.222|2021-01-02	USA	CA-ACPHD-00542	EPI_ISL_4219195	B.1.1.222	2021-01-02
South_Korea|KDCA3654|EPI_ISL_2161141|B.1.1.222|2021-01-02	South_Korea	KDCA3654	EPI_ISL_2161141	B.1.1.222	2021-01-02
Mexico|VER-InDRE_112|EPI_ISL_913916|B.1.1.222|2021-01-02	Mexico	VER-InDRE_112	EPI_ISL_913916	B.1.1.222	2021-01-02
USA|CA-CDPH-2000021195|EPI_ISL_2969346|B.1.1.222|2021-01-02	USA	CA-CDPH-2000021195	EPI_ISL_2969346	B.1.1.222	2021-01-02
USA|CA-CDPH-2000021318|EPI_ISL_2969454|B.1.1.222|2021-01-03	USA	CA-CDPH-2000021318	EPI_ISL_2969454	B.1.1.222	2021-01-03
USA|CA-CDPH-2000020565|EPI_ISL_3671751|B.1.1.222|2021-01-03	USA	CA-CDPH-2000020565	EPI_ISL_3671751	B.1.1.222	2021-01-03
USA|CA-CDPH-2000020567|EPI_ISL_3671753|B.1.1.222|2021-01-03	USA	CA-CDPH-2000020567	EPI_ISL_3671753	B.1.1.222	2021-01-03
USA|CA-CDPH-2000020719|EPI_ISL_3243443|B.1.1.222|2021-01-03	USA	CA-CDPH-2000020719	EPI_ISL_3243443	B.1.1.222	2021-01-03
USA|CA-CDPH-2000020684|EPI_ISL_3671833|B.1.1.222|2021-01-03	USA	CA-CDPH-2000020684	EPI_ISL_3671833	B.1.1.222	2021-01-03
USA|MN-MDH-3103|EPI_ISL_1184253|B.1.1.222|2021-01-03	USA	MN-MDH-3103	EPI_ISL_1184253	B.1.1.222	2021-01-03
USA|CA-CDPH-2000021382|EPI_ISL_5761413|B.1.1.222|2021-01-03	USA	CA-CDPH-2000021382	EPI_ISL_5761413	B.1.1.222	2021-01-03
USA|CA-CZB-24583|EPI_ISL_1185028|B.1.1.222|2021-01-03	USA	CA-CZB-24583	EPI_ISL_1185028	B.1.1.222	2021-01-03
USA|CA-CZB-24582|EPI_ISL_1185073|B.1.1.222|2021-01-03	USA	CA-CZB-24582	EPI_ISL_1185073	B.1.1.222	2021-01-03
USA|CA-CDPH-2000021387|EPI_ISL_2969511|B.1.1.222|2021-01-03	USA	CA-CDPH-2000021387	EPI_ISL_2969511	B.1.1.222	2021-01-03
USA|CA-CDPH-2000021391|EPI_ISL_2969514|B.1.1.222|2021-01-03	USA	CA-CDPH-2000021391	EPI_ISL_2969514	B.1.1.222	2021-01-03
Mexico|YUC-NYGC-305-21|EPI_ISL_3023986|B.1.1.222|2021-01-03	Mexico	YUC-NYGC-305-21	EPI_ISL_3023986	B.1.1.222	2021-01-03
Mexico|CMX-INCMNSZ_COV145587|EPI_ISL_1502817|B.1.1.222|2021-01-04	Mexico	CMX-INCMNSZ_COV145587	EPI_ISL_1502817	B.1.1.222	2021-01-04
USA|CA-SEARCH-101694|EPI_ISL_2628323|B.1.1.222|2021-01-04	USA	CA-SEARCH-101694	EPI_ISL_2628323	B.1.1.222	2021-01-04
USA|TX-HMH-MCoV-36858|EPI_ISL_2207935|B.1.1.222|2021-01-04	USA	TX-HMH-MCoV-36858	EPI_ISL_2207935	B.1.1.222	2021-01-04
USA|CA-CDPH-2000019080|EPI_ISL_3333326|B.1.1.222|2021-01-04	USA	CA-CDPH-2000019080	EPI_ISL_3333326	B.1.1.222	2021-01-04
USA|TX-HMH-MCoV-20571|EPI_ISL_1075013|B.1.1.222|2021-01-04	USA	TX-HMH-MCoV-20571	EPI_ISL_1075013	B.1.1.222	2021-01-04
USA|CA-CDPH-2000021002|EPI_ISL_3243608|B.1.1.222|2021-01-04	USA	CA-CDPH-2000021002	EPI_ISL_3243608	B.1.1.222	2021-01-04
USA|CA-CDPH-2000020058|EPI_ISL_3671530|B.1.1.222|2021-01-04	USA	CA-CDPH-2000020058	EPI_ISL_3671530	B.1.1.222	2021-01-04
USA|NY-NYCPHL-002128|EPI_ISL_857208|B.1.1.222|2021-01-04	USA	NY-NYCPHL-002128	EPI_ISL_857208	B.1.1.222	2021-01-04
USA|CA-CDPH-2000019277|EPI_ISL_3333511|B.1.1.222|2021-01-04	USA	CA-CDPH-2000019277	EPI_ISL_3333511	B.1.1.222	2021-01-04
USA|CA-CDPH-2000019333|EPI_ISL_3333561|B.1.1.222|2021-01-04	USA	CA-CDPH-2000019333	EPI_ISL_3333561	B.1.1.222	2021-01-04
USA|FL-BPHL-0080|EPI_ISL_1030250|B.1.1.222|2021-01-04	USA	FL-BPHL-0080	EPI_ISL_1030250	B.1.1.222	2021-01-04
USA|WI-WSLH-202200|EPI_ISL_983909|B.1.1.222|2021-01-04	USA	WI-WSLH-202200	EPI_ISL_983909	B.1.1.222	2021-01-04
USA|CA-CDPH-2000020899|EPI_ISL_3243514|B.1.1.222|2021-01-04	USA	CA-CDPH-2000020899	EPI_ISL_3243514	B.1.1.222	2021-01-04
USA|NE-CDC-LC0004304|EPI_ISL_886766|B.1.1.222|2021-01-04	USA	NE-CDC-LC0004304	EPI_ISL_886766	B.1.1.222	2021-01-04
USA|CA-CDPH-2000019236|EPI_ISL_3333474|B.1.1.222|2021-01-04	USA	CA-CDPH-2000019236	EPI_ISL_3333474	B.1.1.222	2021-01-04
USA|CA-CDPH-2000019263|EPI_ISL_3333498|B.1.1.222|2021-01-04	USA	CA-CDPH-2000019263	EPI_ISL_3333498	B.1.1.222	2021-01-04
USA|WI-GMF-46696|EPI_ISL_942790|B.1.1.222|2021-01-04	USA	WI-GMF-46696	EPI_ISL_942790	B.1.1.222	2021-01-04
USA|CA-CDPH-2000019938|EPI_ISL_3671431|B.1.1.222|2021-01-04	USA	CA-CDPH-2000019938	EPI_ISL_3671431	B.1.1.222	2021-01-04
[truncated: 1,850 more rows]

## Sheet: B_1_1_519
Name	Country	ID	GSAID	Lineage	Date
China|IPBCAMS-WH-01|EPI_ISL_402123|B|2019-12-24	China	IPBCAMS-WH-01	EPI_ISL_402123	B	2019-12-24
China|WH01|EPI_ISL_406798|B|2019-12-26	China	WH01	EPI_ISL_406798	B	2019-12-26
China|IVDC-HB-GX02|EPI_ISL_434534|B|2019-12-30	China	IVDC-HB-GX02	EPI_ISL_434534	B	2019-12-30
China|WIV02|EPI_ISL_402127|B|2019-12-30	China	WIV02	EPI_ISL_402127	B	2019-12-30
China|IME-WH03|EPI_ISL_529215|B|2019-12-30	China	IME-WH03	EPI_ISL_529215	B	2019-12-30
China|IME-WH01|EPI_ISL_529213|A|2019-12-30	China	IME-WH01	EPI_ISL_529213	A	2019-12-30
China|IVDC-HB-05|EPI_ISL_402121|B|2019-12-30	China	IVDC-HB-05	EPI_ISL_402121	B	2019-12-30
China|IPBCAMS-WH-03|EPI_ISL_403930|B|2019-12-30	China	IPBCAMS-WH-03	EPI_ISL_403930	B	2019-12-30
China|WIV05|EPI_ISL_402128|B|2019-12-30	China	WIV05	EPI_ISL_402128	B	2019-12-30
China|IME-WH04|EPI_ISL_529216|B|2019-12-30	China	IME-WH04	EPI_ISL_529216	B	2019-12-30
China|HBCDC-HB-01|EPI_ISL_402132|B|2019-12-30	China	HBCDC-HB-01	EPI_ISL_402132	B	2019-12-30
China|WIV07|EPI_ISL_402130|B|2019-12-30	China	WIV07	EPI_ISL_402130	B	2019-12-30
China|Hu-1|EPI_ISL_402125|B|2019-12-31	China	Hu-1	EPI_ISL_402125	B	2019-12-31
France|un-20_B.|EPI_ISL_4537783|B.1|2020-01-01	France	un-20_B.	EPI_ISL_4537783	B.1	2020-01-01
China|IPBCAMS-WH-05|EPI_ISL_403928|B|2020-01-01	China	IPBCAMS-WH-05	EPI_ISL_403928	B	2020-01-01
Argentina|PAIS-A1026|EPI_ISL_4405694|B.1.499|2020-01-01	Argentina	PAIS-A1026	EPI_ISL_4405694	B.1.499	2020-01-01
China|HZ103|EPI_ISL_422425|B.1|2020-01-24	China	HZ103	EPI_ISL_422425	B.1	2020-01-24
China|SC-PHCC1-022|EPI_ISL_451345|B.1|2020-01-24	China	SC-PHCC1-022	EPI_ISL_451345	B.1	2020-01-24
China|AP8|EPI_ISL_1655937|A.17|2020-01-25	China	AP8	EPI_ISL_1655937	A.17	2020-01-25
Hong_Kong|HKU-200723-004|EPI_ISL_497771|B.42|2020-01-29	Hong_Kong	HKU-200723-004	EPI_ISL_497771	B.42	2020-01-29
Hong_Kong|HKPU23_2601|EPI_ISL_417183|B.43|2020-01-30	Hong_Kong	HKPU23_2601	EPI_ISL_417183	B.43	2020-01-30
Panama|GMI-PA352445|EPI_ISL_1225382|A.2.4|2020-02-04	Panama	GMI-PA352445	EPI_ISL_1225382	A.2.4	2020-02-04
Spain|MD-IBV-99018532|EPI_ISL_1014733|B.1.177|2020-02-14	Spain	MD-IBV-99018532	EPI_ISL_1014733	B.1.177	2020-02-14
USA|Cruise-CDC-3054886-001|EPI_ISL_414480|B|2020-02-21	USA	Cruise-CDC-3054886-001	EPI_ISL_414480	B	2020-02-21
United_Arab_Emirates|L0184|EPI_ISL_435121|B.4.6|2020-02-25	United_Arab_Emirates	L0184	EPI_ISL_435121	B.4.6	2020-02-25
China|GZMU0031|EPI_ISL_414687|B|2020-02-25	China	GZMU0031	EPI_ISL_414687	B	2020-02-25
Netherlands|Tilburg_1363354|EPI_ISL_413586|B.11|2020-02-27	Netherlands	Tilburg_1363354	EPI_ISL_413586	B.11	2020-02-27
Senegal|003|EPI_ISL_418206|B.1.356|2020-02-28	Senegal	3	EPI_ISL_418206	B.1.356	2020-02-28
Spain|IB-IBV-99007264|EPI_ISL_541968|B.1.1.44|2020-02-28	Spain	IB-IBV-99007264	EPI_ISL_541968	B.1.1.44	2020-02-28
USA|GA-CDC-03063103-001|EPI_ISL_419557|B.1.1.61|2020-02-29	USA	GA-CDC-03063103-001	EPI_ISL_419557	B.1.1.61	2020-02-29
United_Kingdom|201061454|EPI_ISL_464412|B.1.1.323|2020-02-29	United_Kingdom	201061454	EPI_ISL_464412	B.1.1.323	2020-02-29
Brazil|RJ-IC0102020_158-20|EPI_ISL_1739298|B.1.1.33|2020-03-01	Brazil	RJ-IC0102020_158-20	EPI_ISL_1739298	B.1.1.33	2020-03-01
United_Kingdom|NORT-2A6222|EPI_ISL_507128|B.57|2020-03-02	United_Kingdom	NORT-2A6222	EPI_ISL_507128	B.57	2020-03-02
Belgium|VI-03027|EPI_ISL_417427|B.1.1.319|2020-03-02	Belgium	VI-03027	EPI_ISL_417427	B.1.1.319	2020-03-02
United_Kingdom|20108006603|EPI_ISL_417253|B|2020-03-03	United_Kingdom	20108006603	EPI_ISL_417253	B	2020-03-03
New_Zealand|20VR1109|EPI_ISL_456190|B.31|2020-03-03	New_Zealand	20VR1109	EPI_ISL_456190	B.31	2020-03-03
France|HDF-1993|EPI_ISL_414637|B.1.277|2020-03-04	France	HDF-1993	EPI_ISL_414637	B.1.277	2020-03-04
United_Kingdom|201061034|EPI_ISL_464404|B.58|2020-03-04	United_Kingdom	201061034	EPI_ISL_464404	B.58	2020-03-04
Italy|LOM-UniMI-L343|EPI_ISL_542282|B.1.380|2020-03-04	Italy	LOM-UniMI-L343	EPI_ISL_542282	B.1.380	2020-03-04
Italy|VEN-SI_104|EPI_ISL_1181779|B.1.1.161|2020-03-04	Italy	VEN-SI_104	EPI_ISL_1181779	B.1.1.161	2020-03-04
Netherlands|NoordBrabant_21|EPI_ISL_414530|B.1.8|2020-03-04	Netherlands	NoordBrabant_21	EPI_ISL_414530	B.1.8	2020-03-04
Brazil|SP-14|EPI_ISL_416036|B.1.1.28|2020-03-05	Brazil	SP-14	EPI_ISL_416036	B.1.1.28	2020-03-05
Singapore|27|EPI_ISL_420104|B.35|2020-03-05	Singapore	27	EPI_ISL_420104	B.35	2020-03-05
Netherlands|GE-EMC-217|EPI_ISL_523199|B.1.22|2020-03-05	Netherlands	GE-EMC-217	EPI_ISL_523199	B.1.22	2020-03-05
Iceland|62|EPI_ISL_417757|B.1.1.17|2020-03-06	Iceland	62	EPI_ISL_417757	B.1.1.17	2020-03-06
France|ARA-06531|EPI_ISL_416756|B.1.387|2020-03-06	France	ARA-06531	EPI_ISL_416756	B.1.387	2020-03-06
United_Kingdom|20109098906|EPI_ISL_417296|B.47|2020-03-06	United_Kingdom	20109098906	EPI_ISL_417296	B.47	2020-03-06
United_Kingdom|20109028804|EPI_ISL_464549|B.1.201|2020-03-06	United_Kingdom	20109028804	EPI_ISL_464549	B.1.201	2020-03-06
Italy|UMB-ISS-3867|EPI_ISL_856906|B.1.1.70|2020-03-06	Italy	UMB-ISS-3867	EPI_ISL_856906	B.1.1.70	2020-03-06
Iceland|63|EPI_ISL_417855|B.1.510|2020-03-07	Iceland	63	EPI_ISL_417855	B.1.510	2020-03-07
Belgium|HC-030760|EPI_ISL_420451|B.1.1.371|2020-03-07	Belgium	HC-030760	EPI_ISL_420451	B.1.1.371	2020-03-07
Belgium|ULG-3683|EPI_ISL_417011|B.38|2020-03-07	Belgium	ULG-3683	EPI_ISL_417011	B.38	2020-03-07
Italy|VEN-SI_139|EPI_ISL_1181818|B.1.1.204|2020-03-07	Italy	VEN-SI_139	EPI_ISL_1181818	B.1.1.204	2020-03-07
Australia|SA0633|EPI_ISL_1229177|B.1.36.31|2020-03-08	Australia	SA0633	EPI_ISL_1229177	B.1.36.31	2020-03-08
Denmark|DCGC-991|EPI_ISL_614581|B.1.118|2020-03-09	Denmark	DCGC-991	EPI_ISL_614581	B.1.118	2020-03-09
Australia|VIC1703|EPI_ISL_456588|B.4.5|2020-03-09	Australia	VIC1703	EPI_ISL_456588	B.4.5	2020-03-09
USA|LA-CDC-03068669-001|EPI_ISL_424868|B.1.595|2020-03-09	USA	LA-CDC-03068669-001	EPI_ISL_424868	B.1.595	2020-03-09
Denmark|DCGC-979|EPI_ISL_614577|B.1.39|2020-03-09	Denmark	DCGC-979	EPI_ISL_614577	B.1.39	2020-03-09
USA|RI-CDC-03068674-001|EPI_ISL_426435|B.1|2020-03-09	USA	RI-CDC-03068674-001	EPI_ISL_426435	B.1	2020-03-09
Denmark|DCGC-961|EPI_ISL_614557|B.1.179|2020-03-09	Denmark	DCGC-961	EPI_ISL_614557	B.1.179	2020-03-09
United_Kingdom|201140778|EPI_ISL_464741|B.1.284|2020-03-09	United_Kingdom	201140778	EPI_ISL_464741	B.1.284	2020-03-09
United_Kingdom|201141581|EPI_ISL_464766|B.1.391|2020-03-09	United_Kingdom	201141581	EPI_ISL_464766	B.1.391	2020-03-09
India|MH-ICMR-C300|EPI_ISL_1055383|B.1.210|2020-03-10	India	MH-ICMR-C300	EPI_ISL_1055383	B.1.210	2020-03-10
USA|OH-ODH-SC149737|EPI_ISL_1165135|B.1.564|2020-03-11	USA	OH-ODH-SC149737	EPI_ISL_1165135	B.1.564	2020-03-11
Switzerland|BS-UHB-42185807|EPI_ISL_530122|B.1|2020-03-11	Switzerland	BS-UHB-42185807	EPI_ISL_530122	B.1	2020-03-11
Finland|11MS2F2|EPI_ISL_1218651|B.1|2020-03-11	Finland	11MS2F2	EPI_ISL_1218651	B.1	2020-03-11
Greece|136|EPI_ISL_434473|B.1.1.16|2020-03-11	Greece	136	EPI_ISL_434473	B.1.1.16	2020-03-11
United_Kingdom|LIVE-A4B49|EPI_ISL_500074|B.1.1.372|2020-03-11	United_Kingdom	LIVE-A4B49	EPI_ISL_500074	B.1.1.372	2020-03-11
USA|MD-HP00076|EPI_ISL_438234|A.3|2020-03-11	USA	MD-HP00076	EPI_ISL_438234	A.3	2020-03-11
Sweden|20-05444|EPI_ISL_445221|B.1.555|2020-03-11	Sweden	20-05444	EPI_ISL_445221	B.1.555	2020-03-11
France|HDF-2405|EPI_ISL_418228|B.1.354|2020-03-12	France	HDF-2405	EPI_ISL_418228	B.1.354	2020-03-12
USA|NY-QDX-87|EPI_ISL_468582|B.1.586|2020-03-12	USA	NY-QDX-87	EPI_ISL_468582	B.1.586	2020-03-12
United_Kingdom|20129154104|EPI_ISL_424118|B.52|2020-03-12	United_Kingdom	20129154104	EPI_ISL_424118	B.52	2020-03-12
China|DT-travelNO01|EPI_ISL_452342|B|2020-03-12	China	DT-travelNO01	EPI_ISL_452342	B	2020-03-12
United_Kingdom|BRIS-1309ED|EPI_ISL_492694|B.10|2020-03-12	United_Kingdom	BRIS-1309ED	EPI_ISL_492694	B.10	2020-03-12
USA|UT-QDX-2230|EPI_ISL_604591|B.1.413|2020-03-12	USA	UT-QDX-2230	EPI_ISL_604591	B.1.413	2020-03-12
Sweden|20-50299|EPI_ISL_475129|B.1.1.135|2020-03-12	Sweden	20-50299	EPI_ISL_475129	B.1.1.135	2020-03-12
United_Kingdom|201160037|EPI_ISL_464779|B.1.250|2020-03-12	United_Kingdom	201160037	EPI_ISL_464779	B.1.250	2020-03-12
United_Kingdom|20118179304|EPI_ISL_465000|B.1.1.89|2020-03-12	United_Kingdom	20118179304	EPI_ISL_465000	B.1.1.89	2020-03-12
USA|NY-PV08125|EPI_ISL_421354|B.1.314|2020-03-13	USA	NY-PV08125	EPI_ISL_421354	B.1.314	2020-03-13
USA|WI-UW-22|EPI_ISL_417514|A.4|2020-03-13	USA	WI-UW-22	EPI_ISL_417514	A.4	2020-03-13
Finland|13M33|EPI_ISL_418390|B.1.158|2020-03-13	Finland	13M33	EPI_ISL_418390	B.1.158	2020-03-13
United_Kingdom|CVR33|EPI_ISL_425762|B.45|2020-03-13	United_Kingdom	CVR33	EPI_ISL_425762	B.45	2020-03-13
United_Kingdom|CVR47|EPI_ISL_425776|B.32|2020-03-13	United_Kingdom	CVR47	EPI_ISL_425776	B.32	2020-03-13
Qatar|QA-QU_02-2-44|EPI_ISL_1712699|B.36|2020-03-13	Qatar	QA-QU_02-2-44	EPI_ISL_1712699	B.36	2020-03-13
Switzerland|BS-UHB-42189582|EPI_ISL_528046|B.1.128|2020-03-13	Switzerland	BS-UHB-42189582	EPI_ISL_528046	B.1.128	2020-03-13
Canada|QC-LSPQ-L00217574|EPI_ISL_535765|B.1.547|2020-03-13	Canada	QC-LSPQ-L00217574	EPI_ISL_535765	B.1.547	2020-03-13
USA|CT-UW328|EPI_ISL_418895|B.1.108|2020-03-14	USA	CT-UW328	EPI_ISL_418895	B.1.108	2020-03-14
USA|TX-HMH046|EPI_ISL_434755|B.1.450|2020-03-14	USA	TX-HMH046	EPI_ISL_434755	B.1.450	2020-03-14
Germany|HH-hpi-p1504|EPI_ISL_776010|B.1.465|2020-03-14	Germany	HH-hpi-p1504	EPI_ISL_776010	B.1.465	2020-03-14
United_Arab_Emirates|L9766|EPI_ISL_435142|B.56|2020-03-14	United_Arab_Emirates	L9766	EPI_ISL_435142	B.56	2020-03-14
United_Kingdom|GSTT-265E3C2|EPI_ISL_484195|B.1.391|2020-03-14	United_Kingdom	GSTT-265E3C2	EPI_ISL_484195	B.1.391	2020-03-14
USA|TX-QDX-25|EPI_ISL_467906|B.1.324|2020-03-15	USA	TX-QDX-25	EPI_ISL_467906	B.1.324	2020-03-15
Australia|NSW2004|EPI_ISL_500596|B.1.384|2020-03-15	Australia	NSW2004	EPI_ISL_500596	B.1.384	2020-03-15
USA|WI-UW-158|EPI_ISL_428254|B.1.483|2020-03-15	USA	WI-UW-158	EPI_ISL_428254	B.1.483	2020-03-15
USA|IL-NM025|EPI_ISL_444535|B.1.162|2020-03-15	USA	IL-NM025	EPI_ISL_444535	B.1.162	2020-03-15
USA|MN-QDX-1320|EPI_ISL_572109|B.1.589|2020-03-15	USA	MN-QDX-1320	EPI_ISL_572109	B.1.589	2020-03-15
USA|NY-PV09362|EPI_ISL_450050|B.1.507|2020-03-15	USA	NY-PV09362	EPI_ISL_450050	B.1.507	2020-03-15
Luxembourg|LNS0366116|EPI_ISL_419564|B.1.94|2020-03-15	Luxembourg	LNS0366116	EPI_ISL_419564	B.1.94	2020-03-15
United_Kingdom|20122017204|EPI_ISL_465738|B.1.1|2020-03-15	United_Kingdom	20122017204	EPI_ISL_465738	B.1.1	2020-03-15
USA|FL-QDX-1620|EPI_ISL_603938|B.1.293|2020-03-16	USA	FL-QDX-1620	EPI_ISL_603938	B.1.293	2020-03-16
USA|MN-QDX-1722|EPI_ISL_604071|B.1.424|2020-03-16	USA	MN-QDX-1722	EPI_ISL_604071	B.1.424	2020-03-16
Australia|VIC95|EPI_ISL_419806|B.1|2020-03-16	Australia	VIC95	EPI_ISL_419806	B.1	2020-03-16
Switzerland|BS-UHB-42193328|EPI_ISL_528149|B.1|2020-03-16	Switzerland	BS-UHB-42193328	EPI_ISL_528149	B.1	2020-03-16
Japan|PG-0189|EPI_ISL_479894|B.1.1.283|2020-03-16	Japan	PG-0189	EPI_ISL_479894	B.1.1.283	2020-03-16
Portugal|PT1095|EPI_ISL_511642|B.1.224|2020-03-16	Portugal	PT1095	EPI_ISL_511642	B.1.224	2020-03-16
USA|CA-QDX-1915|EPI_ISL_604200|B.1.441|2020-03-16	USA	CA-QDX-1915	EPI_ISL_604200	B.1.441	2020-03-16
USA|CA-CZB-1414|EPI_ISL_468389|B.1.163|2020-03-16	USA	CA-CZB-1414	EPI_ISL_468389	B.1.163	2020-03-16
USA|LA-QDX-2624|EPI_ISL_604936|B.1.284|2020-03-16	USA	LA-QDX-2624	EPI_ISL_604936	B.1.284	2020-03-16
United_Kingdom|BRIS-12193A|EPI_ISL_440220|B.1.379|2020-03-16	United_Kingdom	BRIS-12193A	EPI_ISL_440220	B.1.379	2020-03-16
Switzerland|SG-ETHZ-100145|EPI_ISL_451729|B.1.1.142|2020-03-16	Switzerland	SG-ETHZ-100145	EPI_ISL_451729	B.1.1.142	2020-03-16
Sweden|20-23088|EPI_ISL_831975|B.1.227|2020-03-16	Sweden	20-23088	EPI_ISL_831975	B.1.227	2020-03-16
United_Arab_Emirates|L0879|EPI_ISL_435124|B.1.1.366|2020-03-16	United_Arab_Emirates	L0879	EPI_ISL_435124	B.1.1.366	2020-03-16
Iceland|188|EPI_ISL_417816|B.1.1.5|2020-03-16	Iceland	188	EPI_ISL_417816	B.1.1.5	2020-03-16
France|GES-2843|EPI_ISL_420045|B.1.482|2020-03-17	France	GES-2843	EPI_ISL_420045	B.1.482	2020-03-17
USA|WA-UW389|EPI_ISL_418954|B.1.38|2020-03-17	USA	WA-UW389	EPI_ISL_418954	B.1.38	2020-03-17
United_Kingdom|EDB051|EPI_ISL_425855|B.1.1.277|2020-03-17	United_Kingdom	EDB051	EPI_ISL_425855	B.1.1.277	2020-03-17
Belgium|UGent-96|EPI_ISL_468744|B.1.1.75|2020-03-17	Belgium	UGent-96	EPI_ISL_468744	B.1.1.75	2020-03-17
USA|FL-QDX-1658|EPI_ISL_603941|B.1.1.67|2020-03-18	USA	FL-QDX-1658	EPI_ISL_603941	B.1.1.67	2020-03-18
United_Kingdom|BRIS-121C9B|EPI_ISL_440218|B.1.81|2020-03-18	United_Kingdom	BRIS-121C9B	EPI_ISL_440218	B.1.81	2020-03-18
Australia|VIC774|EPI_ISL_427050|B.1.23|2020-03-18	Australia	VIC774	EPI_ISL_427050	B.1.23	2020-03-18
Germany|HH-hpi-p1783|EPI_ISL_776154|B.1|2020-03-19	Germany	HH-hpi-p1783	EPI_ISL_776154	B.1	2020-03-19
USA|UT-028|EPI_ISL_417971|B.1.370|2020-03-19	USA	UT-028	EPI_ISL_417971	B.1.370	2020-03-19
Denmark|ALAB-HH-157|EPI_ISL_452032|B.1.263|2020-03-19	Denmark	ALAB-HH-157	EPI_ISL_452032	B.1.263	2020-03-19
USA|CA-QDX-1625|EPI_ISL_603907|B.1.170|2020-03-19	USA	CA-QDX-1625	EPI_ISL_603907	B.1.170	2020-03-19
Australia|VIC191|EPI_ISL_419887|B.1.1.416|2020-03-19	Australia	VIC191	EPI_ISL_419887	B.1.1.416	2020-03-19
United_Kingdom|SHEF-CBCA3|EPI_ISL_432515|B.1.1.137|2020-03-19	United_Kingdom	SHEF-CBCA3	EPI_ISL_432515	B.1.1.137	2020-03-19
Senegal|620|EPI_ISL_420078|A.11|2020-03-20	Senegal	620	EPI_ISL_420078	A.11	2020-03-20
Portugal|PT0513|EPI_ISL_454237|B.1.1.88|2020-03-20	Portugal	PT0513	EPI_ISL_454237	B.1.1.88	2020-03-20
United_Kingdom|PHWC-24F09|EPI_ISL_420926|B.1.1.289|2020-03-20	United_Kingdom	PHWC-24F09	EPI_ISL_420926	B.1.1.289	2020-03-20
United_Kingdom|PORT-2D2111|EPI_ISL_611771|B.1.177.20|2020-03-21	United_Kingdom	PORT-2D2111	EPI_ISL_611771	B.1.177.20	2020-03-21
Australia|QLD1276|EPI_ISL_693277|B.1.177.7|2020-03-21	Australia	QLD1276	EPI_ISL_693277	B.1.177.7	2020-03-21
Iceland|1014|EPI_ISL_1586301|B.1.1.162|2020-03-21	Iceland	1014	EPI_ISL_1586301	B.1.1.162	2020-03-21
Australia|VIC252|EPI_ISL_419947|B.1.1.89|2020-03-21	Australia	VIC252	EPI_ISL_419947	B.1.1.89	2020-03-21
Bulgaria|06|EPI_ISL_480297|B.1.1.192|2020-03-21	Bulgaria	6	EPI_ISL_480297	B.1.1.192	2020-03-21
United_Kingdom|NIRE-1020D0|EPI_ISL_441379|B.1.1.83|2020-03-21	United_Kingdom	NIRE-1020D0	EPI_ISL_441379	B.1.1.83	2020-03-21
United_Kingdom|CAMB-73141|EPI_ISL_440297|B.1.1.41|2020-03-21	United_Kingdom	CAMB-73141	EPI_ISL_440297	B.1.1.41	2020-03-21
United_Kingdom|BRIS-121D98|EPI_ISL_440000|B.1.1.270|2020-03-21	United_Kingdom	BRIS-121D98	EPI_ISL_440000	B.1.1.270	2020-03-21
Australia|VIC369|EPI_ISL_426677|B.1.434|2020-03-22	Australia	VIC369	EPI_ISL_426677	B.1.434	2020-03-22
Canada|AB-35896|EPI_ISL_805923|B.1.308|2020-03-22	Canada	AB-35896	EPI_ISL_805923	B.1.308	2020-03-22
USA|TX-HMH0153|EPI_ISL_434852|B.1.276|2020-03-22	USA	TX-HMH0153	EPI_ISL_434852	B.1.276	2020-03-22
Canada|Qc-LSPQ-L00239009|EPI_ISL_536230|B.1.219|2020-03-22	Canada	Qc-LSPQ-L00239009	EPI_ISL_536230	B.1.219	2020-03-22
Canada|ON-S1230|EPI_ISL_586305|B.1.1.181|2020-03-22	Canada	ON-S1230	EPI_ISL_586305	B.1.1.181	2020-03-22
United_Kingdom|20130069504|EPI_ISL_423656|B.1.258|2020-03-22	United_Kingdom	20130069504	EPI_ISL_423656	B.1.258	2020-03-22
Kazakhstan|NCB-1|EPI_ISL_435045|B.4.1|2020-03-22	Kazakhstan	NCB-1	EPI_ISL_435045	B.4.1	2020-03-22
Nigeria|NG57839|EPI_ISL_654794|B.1.1.487|2020-03-22	Nigeria	NG57839	EPI_ISL_654794	B.1.1.487	2020-03-22
Italy|VEN-IZSVe-2-2|EPI_ISL_636472|B.1.1|2020-03-22	Italy	VEN-IZSVe-2-2	EPI_ISL_636472	B.1.1	2020-03-22
Canada|NS-NML-912|EPI_ISL_914979|B.1.1.133|2020-03-22	Canada	NS-NML-912	EPI_ISL_914979	B.1.1.133	2020-03-22
Belgium|FMC-0323159|EPI_ISL_420416|B.1.1.436|2020-03-23	Belgium	FMC-0323159	EPI_ISL_420416	B.1.1.436	2020-03-23
Ecuador|EC-G-2565|EPI_ISL_826805|B.1.1.326|2020-03-23	Ecuador	EC-G-2565	EPI_ISL_826805	B.1.1.326	2020-03-23
United_Kingdom|GCVR-17027D|EPI_ISL_459686|B.1.1.482|2020-03-24	United_Kingdom	GCVR-17027D	EPI_ISL_459686	B.1.1.482	2020-03-24
Spain|AR-IBV-2474|EPI_ISL_468816|B.1.542|2020-03-24	Spain	AR-IBV-2474	EPI_ISL_468816	B.1.542	2020-03-24
Saudi_Arabia|KAUST-MAKKAH143|EPI_ISL_678229|B.1.260|2020-03-24	Saudi_Arabia	KAUST-MAKKAH143	EPI_ISL_678229	B.1.260	2020-03-24
Belgium|UGent-11|EPI_ISL_419259|B.11|2020-03-24	Belgium	UGent-11	EPI_ISL_419259	B.11	2020-03-24
USA|MN-MDH-1293|EPI_ISL_483013|B.1.330|2020-03-24	USA	MN-MDH-1293	EPI_ISL_483013	B.1.330	2020-03-24
Finland|24MS1A6|EPI_ISL_1239429|B.1.1.110|2020-03-24	Finland	24MS1A6	EPI_ISL_1239429	B.1.1.110	2020-03-24
Japan|PG-2894|EPI_ISL_691020|B.1.1.285|2020-03-25	Japan	PG-2894	EPI_ISL_691020	B.1.1.285	2020-03-25
Egypt|CPHL-NRC-18|EPI_ISL_794594|B.1.535|2020-03-25	Egypt	CPHL-NRC-18	EPI_ISL_794594	B.1.535	2020-03-25
Saudi_Arabia|KAUST-Jeddah59|EPI_ISL_437496|B.1.471|2020-03-25	Saudi_Arabia	KAUST-Jeddah59	EPI_ISL_437496	B.1.471	2020-03-25
United_Kingdom|CVR702|EPI_ISL_433327|B.1.1.43|2020-03-25	United_Kingdom	CVR702	EPI_ISL_433327	B.1.1.43	2020-03-25
New_Zealand|20VR3181|EPI_ISL_579469|B.1.545|2020-03-25	New_Zealand	20VR3181	EPI_ISL_579469	B.1.545	2020-03-25
United_Kingdom|PHWC-15C462|EPI_ISL_472490|B.1.1.249|2020-03-26	United_Kingdom	PHWC-15C462	EPI_ISL_472490	B.1.1.249	2020-03-26
Japan|PG-1918|EPI_ISL_685524|B.1.1.48|2020-03-27	Japan	PG-1918	EPI_ISL_685524	B.1.1.48	2020-03-27
Spain|VC-FISABIO-571|EPI_ISL_447502|B.1.1|2020-03-27	Spain	VC-FISABIO-571	EPI_ISL_447502	B.1.1	2020-03-27
USA|OR-PROV-220|EPI_ISL_482455|B.1.161|2020-03-27	USA	OR-PROV-220	EPI_ISL_482455	B.1.161	2020-03-27
United_Kingdom|BRIS-1253DE|EPI_ISL_443943|B.1.167|2020-03-27	United_Kingdom	BRIS-1253DE	EPI_ISL_443943	B.1.167	2020-03-27
Luxembourg|LNS4530810|EPI_ISL_429770|B.1.143|2020-03-28	Luxembourg	LNS4530810	EPI_ISL_429770	B.1.143	2020-03-28
Poland|PL_P4|EPI_ISL_428927|B.1.187|2020-03-28	Poland	PL_P4	EPI_ISL_428927	B.1.187	2020-03-28
Belgium|LL-0328341|EPI_ISL_462195|B.1.1.200|2020-03-28	Belgium	LL-0328341	EPI_ISL_462195	B.1.1.200	2020-03-28
United_Kingdom|GCVR-17176E|EPI_ISL_489620|B.1.248|2020-03-28	United_Kingdom	GCVR-17176E	EPI_ISL_489620	B.1.248	2020-03-28
Belgium|VHEJ-0329357|EPI_ISL_462211|B.1.1.221|2020-03-29	Belgium	VHEJ-0329357	EPI_ISL_462211	B.1.1.221	2020-03-29
Israel|13075703|EPI_ISL_447450|B.1.1.50|2020-03-29	Israel	13075703	EPI_ISL_447450	B.1.1.50	2020-03-29
United_Kingdom|SHEF-C03E5|EPI_ISL_420221|B.1.607|2020-03-29	United_Kingdom	SHEF-C03E5	EPI_ISL_420221	B.1.607	2020-03-29
Portugal|PT1401|EPI_ISL_511360|B.1.1|2020-03-29	Portugal	PT1401	EPI_ISL_511360	B.1.1	2020-03-29
Canada|QC-JUS-V6011098|EPI_ISL_889857|B.1.592|2020-03-30	Canada	QC-JUS-V6011098	EPI_ISL_889857	B.1.592	2020-03-30
Australia|VIC1192|EPI_ISL_430528|B.1.338|2020-03-30	Australia	VIC1192	EPI_ISL_430528	B.1.338	2020-03-30
Iceland|733|EPI_ISL_1586661|B.1|2020-03-30	Iceland	733	EPI_ISL_1586661	B.1	2020-03-30
USA|CA-SR0447|EPI_ISL_467971|B.1.552|2020-03-30	USA	CA-SR0447	EPI_ISL_467971	B.1.552	2020-03-30
United_Kingdom|PHWC-2764D|EPI_ISL_432211|B.1.1.363|2020-03-30	United_Kingdom	PHWC-2764D	EPI_ISL_432211	B.1.1.363	2020-03-30
India|MH-NIV-QA-710|EPI_ISL_454565|B.1.1.101|2020-03-31	India	MH-NIV-QA-710	EPI_ISL_454565	B.1.1.101	2020-03-31
France|IDF_HB_112003109999|EPI_ISL_940256|B.1.84|2020-03-31	France	IDF_HB_112003109999	EPI_ISL_940256	B.1.84	2020-03-31
United_Kingdom|EDB5108|EPI_ISL_453188|B.1.9.1|2020-03-31	United_Kingdom	EDB5108	EPI_ISL_453188	B.1.9.1	2020-03-31
USA|NY-NYCPHL-000123|EPI_ISL_631614|B.1|2020-03-31	USA	NY-NYCPHL-000123	EPI_ISL_631614	B.1	2020-03-31
United_Kingdom|CAMB-77990|EPI_ISL_439524|B.1.1.304|2020-03-31	United_Kingdom	CAMB-77990	EPI_ISL_439524	B.1.1.304	2020-03-31
United_Kingdom|CAMB-7386A|EPI_ISL_425246|B.1.1.398|2020-03-31	United_Kingdom	CAMB-7386A	EPI_ISL_425246	B.1.1.398	2020-03-31
United_Kingdom|NORT-289744|EPI_ISL_458605|B.1.1.168|2020-03-31	United_Kingdom	NORT-289744	EPI_ISL_458605	B.1.1.168	2020-03-31
USA|WA-UW-4582|EPI_ISL_429607|B.1.169|2020-03-31	USA	WA-UW-4582	EPI_ISL_429607	B.1.169	2020-03-31
USA|WY-WYPHL-20007007|EPI_ISL_493063|B.1.301|2020-04-01	USA	WY-WYPHL-20007007	EPI_ISL_493063	B.1.301	2020-04-01
Russia|CRIE187963|EPI_ISL_486829|B.1.1.163|2020-04-01	Russia	CRIE187963	EPI_ISL_486829	B.1.1.163	2020-04-01
Netherlands|NA_292|EPI_ISL_422601|B.1.96|2020-04-01	Netherlands	NA_292	EPI_ISL_422601	B.1.96	2020-04-01
Germany|BY-MVP-0084|EPI_ISL_437278|B.1|2020-04-01	Germany	BY-MVP-0084	EPI_ISL_437278	B.1	2020-04-01
New_Zealand|20VR1914|EPI_ISL_579162|B.1.1|2020-04-02	New_Zealand	20VR1914	EPI_ISL_579162	B.1.1	2020-04-02
USA|WA-S481|EPI_ISL_434241|B.1.1.26|2020-04-02	USA	WA-S481	EPI_ISL_434241	B.1.1.26	2020-04-02
United_Kingdom|CAMB-7A14A|EPI_ISL_441289|B.1.1.178|2020-04-02	United_Kingdom	CAMB-7A14A	EPI_ISL_441289	B.1.1.178	2020-04-02
Israel|13077723|EPI_ISL_447427|B.1.362|2020-04-03	Israel	13077723	EPI_ISL_447427	B.1.362	2020-04-03
United_Kingdom|LEED-2A87C7|EPI_ISL_539017|B.1.110.2|2020-04-03	United_Kingdom	LEED-2A87C7	EPI_ISL_539017	B.1.110.2	2020-04-03
United_Kingdom|BRIS-122BAC|EPI_ISL_440738|B.1.198|2020-04-03	United_Kingdom	BRIS-122BAC	EPI_ISL_440738	B.1.198	2020-04-03
Germany|BE-ChVir-W1078-7878|EPI_ISL_753932|B.1|2020-04-04	Germany	BE-ChVir-W1078-7878	EPI_ISL_753932	B.1	2020-04-04
United_Kingdom|QEUH-9A4506|EPI_ISL_540217|B.1.1.138|2020-04-04	United_Kingdom	QEUH-9A4506	EPI_ISL_540217	B.1.1.138	2020-04-04
Russia|StPetersburg-RII4655S|EPI_ISL_427322|B.1.1.370|2020-04-05	Russia	StPetersburg-RII4655S	EPI_ISL_427322	B.1.1.370	2020-04-05
United_Kingdom|CAMB-7CC38|EPI_ISL_442171|B.1.1.379|2020-04-05	United_Kingdom	CAMB-7CC38	EPI_ISL_442171	B.1.1.379	2020-04-05
USA|IL-LCH-0052|EPI_ISL_1501744|B.1.180|2020-04-06	USA	IL-LCH-0052	EPI_ISL_1501744	B.1.180	2020-04-06
Sweden|20-50673|EPI_ISL_475155|B.1.1.261|2020-04-06	Sweden	20-50673	EPI_ISL_475155	B.1.1.261	2020-04-06
USA|FL-BPHL-0656|EPI_ISL_508860|B.1.493|2020-04-07	USA	FL-BPHL-0656	EPI_ISL_508860	B.1.493	2020-04-07
USA|CA-CZB-10156|EPI_ISL_672235|B.1.403|2020-04-07	USA	CA-CZB-10156	EPI_ISL_672235	B.1.403	2020-04-07
USA|TX-DSHS-0225|EPI_ISL_525784|B.1.1.244|2020-04-07	USA	TX-DSHS-0225	EPI_ISL_525784	B.1.1.244	2020-04-07
United_Kingdom|PHWC-2A96F|EPI_ISL_445641|B.1.1.360|2020-04-07	United_Kingdom	PHWC-2A96F	EPI_ISL_445641	B.1.1.360	2020-04-07
Italy|LAZ-AMC-2004088031-DS|EPI_ISL_1854982|B.1.1.58|2020-04-08	Italy	LAZ-AMC-2004088031-DS	EPI_ISL_1854982	B.1.1.58	2020-04-08
United_Kingdom|CAMB-7ACC1|EPI_ISL_433864|B.1.1|2020-04-09	United_Kingdom	CAMB-7ACC1	EPI_ISL_433864	B.1.1	2020-04-09
United_Kingdom|CAMB-7AEAD|EPI_ISL_433888|B.1.1.197|2020-04-09	United_Kingdom	CAMB-7AEAD	EPI_ISL_433888	B.1.1.197	2020-04-09
India|WB-IK62|EPI_ISL_511903|B.1.206|2020-04-09	India	WB-IK62	EPI_ISL_511903	B.1.206	2020-04-09
Sierra_Leone|KGH-G-8625|EPI_ISL_512816|A.12|2020-04-10	Sierra_Leone	KGH-G-8625	EPI_ISL_512816	A.12	2020-04-10
Russia|Moscow_PMVL-10|EPI_ISL_470903|B.1.1.500|2020-04-10	Russia	Moscow_PMVL-10	EPI_ISL_470903	B.1.1.500	2020-04-10
USA|MN-MDH-1768|EPI_ISL_590772|B.1.596|2020-04-11	USA	MN-MDH-1768	EPI_ISL_590772	B.1.596	2020-04-11
United_Kingdom|NOTT-110330|EPI_ISL_441501|B.1.1.55|2020-04-12	United_Kingdom	NOTT-110330	EPI_ISL_441501	B.1.1.55	2020-04-12
United_Kingdom|NIRE-FC368|EPI_ISL_470028|B.1.1.148|2020-04-12	United_Kingdom	NIRE-FC368	EPI_ISL_470028	B.1.1.148	2020-04-12
Spain|PV-IBV-2137|EPI_ISL_468885|B.1.1|2020-04-12	Spain	PV-IBV-2137	EPI_ISL_468885	B.1.1	2020-04-12
Australia|NSW601|EPI_ISL_478713|B.1|2020-04-13	Australia	NSW601	EPI_ISL_478713	B.1	2020-04-13
USA|MN-MDH-1774|EPI_ISL_590777|B.1.382|2020-04-13	USA	MN-MDH-1774	EPI_ISL_590777	B.1.382	2020-04-13
South_Africa|NHLS-UCT-GP-5021|EPI_ISL_640097|B.1.1.34|2020-04-15	South_Africa	NHLS-UCT-GP-5021	EPI_ISL_640097	B.1.1.34	2020-04-15
United_Kingdom|SHEF-C16DC|EPI_ISL_432729|B.1.1|2020-04-15	United_Kingdom	SHEF-C16DC	EPI_ISL_432729	B.1.1	2020-04-15
United_Kingdom|EDB1832|EPI_ISL_433152|B.1|2020-04-16	United_Kingdom	EDB1832	EPI_ISL_433152	B.1	2020-04-16
USA|MA-MASPHL-00271|EPI_ISL_791703|B.1.1.335|2020-04-17	USA	MA-MASPHL-00271	EPI_ISL_791703	B.1.1.335	2020-04-17
USA|AZ-TG724354|EPI_ISL_1113468|B.1.445|2020-04-17	USA	AZ-TG724354	EPI_ISL_1113468	B.1.445	2020-04-17
USA|NH-Yale-1640|EPI_ISL_1168366|B.1.443|2020-04-18	USA	NH-Yale-1640	EPI_ISL_1168366	B.1.443	2020-04-18
USA|FL-BPHL-1986|EPI_ISL_653139|B.1.509|2020-04-18	USA	FL-BPHL-1986	EPI_ISL_653139	B.1.509	2020-04-18
USA|VA-DCLS-0684|EPI_ISL_500846|B.1.451|2020-04-18	USA	VA-DCLS-0684	EPI_ISL_500846	B.1.451	2020-04-18
USA|MO-MSPHL-000515|EPI_ISL_1392875|B.1.377|2020-04-19	USA	MO-MSPHL-000515	EPI_ISL_1392875	B.1.377	2020-04-19
USA|CO-CDPHE-2004220732|EPI_ISL_710184|B.1.492|2020-04-20	USA	CO-CDPHE-2004220732	EPI_ISL_710184	B.1.492	2020-04-20
Denmark|DCGC-6742|EPI_ISL_622356|A.15|2020-04-20	Denmark	DCGC-6742	EPI_ISL_622356	A.15	2020-04-20
Finland|20A16S7|EPI_ISL_481595|B.1.490|2020-04-20	Finland	20A16S7	EPI_ISL_481595	B.1.490	2020-04-20
USA|NY-Wadsworth-57118-01|EPI_ISL_525686|B.1.506|2020-04-20	USA	NY-Wadsworth-57118-01	EPI_ISL_525686	B.1.506	2020-04-20
Russia|StPetersburg-RII7520S|EPI_ISL_450256|B.1.1.127|2020-04-20	Russia	StPetersburg-RII7520S	EPI_ISL_450256	B.1.1.127	2020-04-20
Equatorial_Guinea|2426|EPI_ISL_648316|B.1.192|2020-04-21	Equatorial_Guinea	2426	EPI_ISL_648316	B.1.192	2020-04-21
India|GJ-GBRC9|EPI_ISL_435056|B.1.145|2020-04-21	India	GJ-GBRC9	EPI_ISL_435056	B.1.145	2020-04-21
Poland|Pom5|EPI_ISL_451646|C.10|2020-04-22	Poland	Pom5	EPI_ISL_451646	C.10	2020-04-22
United_Kingdom|EDB4335|EPI_ISL_453122|B.1.168|2020-04-23	United_Kingdom	EDB4335	EPI_ISL_453122	B.1.168	2020-04-23
USA|UT-UPHL-02807|EPI_ISL_575081|B.1.106|2020-04-23	USA	UT-UPHL-02807	EPI_ISL_575081	B.1.106	2020-04-23
USA|AZ-TG280883|EPI_ISL_694212|B.1.1|2020-04-24	USA	AZ-TG280883	EPI_ISL_694212	B.1.1	2020-04-24
Belarus|MI-RII-MH11337S|EPI_ISL_754229|B.1.164|2020-04-24	Belarus	MI-RII-MH11337S	EPI_ISL_754229	B.1.164	2020-04-24
USA|Navy-CDC-3539679-001|EPI_ISL_514090|B.1.1|2020-04-24	USA	Navy-CDC-3539679-001	EPI_ISL_514090	B.1.1	2020-04-24
USA|WA-UW-8165|EPI_ISL_570200|B.1.341|2020-04-25	USA	WA-UW-8165	EPI_ISL_570200	B.1.341	2020-04-25
USA|MA-MASPHL-00406|EPI_ISL_693142|B.1|2020-04-25	USA	MA-MASPHL-00406	EPI_ISL_693142	B.1	2020-04-25
USA|TX-HMH-1172|EPI_ISL_542563|B.1.572|2020-04-26	USA	TX-HMH-1172	EPI_ISL_542563	B.1.572	2020-04-26
United_Kingdom|MILK-482D1A|EPI_ISL_559696|B.1.1.217|2020-04-26	United_Kingdom	MILK-482D1A	EPI_ISL_559696	B.1.1.217	2020-04-26
USA|TX-QDX-188|EPI_ISL_494543|B.1.366|2020-04-27	USA	TX-QDX-188	EPI_ISL_494543	B.1.366	2020-04-27
USA|NC-QDX-171|EPI_ISL_494523|B.1.498|2020-04-27	USA	NC-QDX-171	EPI_ISL_494523	B.1.498	2020-04-27
USA|WA-S904|EPI_ISL_463394|B.1.1.291|2020-04-27	USA	WA-S904	EPI_ISL_463394	B.1.1.291	2020-04-27
USA|CA-CDPH041|EPI_ISL_754930|B.1.508|2020-04-28	USA	CA-CDPH041	EPI_ISL_754930	B.1.508	2020-04-28
Sweden|20-14090|EPI_ISL_450828|B.1.1.91|2020-04-28	Sweden	20-14090	EPI_ISL_450828	B.1.1.91	2020-04-28
Egypt|MASRI-014|EPI_ISL_482765|B.1.466|2020-04-30	Egypt	MASRI-014	EPI_ISL_482765	B.1.466	2020-04-30
United_Kingdom|BRIS-12ACFC|EPI_ISL_458367|B.1.165|2020-05-01	United_Kingdom	BRIS-12ACFC	EPI_ISL_458367	B.1.165	2020-05-01
United_Kingdom|NOTT-11152A|EPI_ISL_457576|B.1.1.149|2020-05-01	United_Kingdom	NOTT-11152A	EPI_ISL_457576	B.1.1.149	2020-05-01
USA|TX-HMH-1371|EPI_ISL_542678|B.1.511|2020-05-02	USA	TX-HMH-1371	EPI_ISL_542678	B.1.511	2020-05-02
USA|UT-UPHL-03046|EPI_ISL_560897|B.1.554|2020-05-02	USA	UT-UPHL-03046	EPI_ISL_560897	B.1.554	2020-05-02
Russia|SAR-RARI-3573|EPI_ISL_678283|B.1.1.424|2020-05-02	Russia	SAR-RARI-3573	EPI_ISL_678283	B.1.1.424	2020-05-02
India|GJ-GBRC53|EPI_ISL_444484|B.1.247|2020-05-04	India	GJ-GBRC53	EPI_ISL_444484	B.1.247	2020-05-04
USA|VA-DCLS-0824|EPI_ISL_516698|B.1.1.447|2020-05-05	USA	VA-DCLS-0824	EPI_ISL_516698	B.1.1.447	2020-05-05
United_Kingdom|ALDP-9EDBD2|EPI_ISL_580650|B.1.1.253|2020-05-09	United_Kingdom	ALDP-9EDBD2	EPI_ISL_580650	B.1.1.253	2020-05-09
Poland|PL_MCB_72|EPI_ISL_645071|B.1.213|2020-05-10	Poland	PL_MCB_72	EPI_ISL_645071	B.1.213	2020-05-10
USA|TX-HMH-2050|EPI_ISL_545087|B.1.1.118|2020-05-11	USA	TX-HMH-2050	EPI_ISL_545087	B.1.1.118	2020-05-11
USA|CA-CZB-2341|EPI_ISL_513791|B.1.452|2020-05-12	USA	CA-CZB-2341	EPI_ISL_513791	B.1.452	2020-05-12
Romania|283584|EPI_ISL_455469|B.1.408|2020-05-12	Romania	283584	EPI_ISL_455469	B.1.408	2020-05-12
USA|AZ-TG668341|EPI_ISL_696266|B.1.313|2020-05-13	USA	AZ-TG668341	EPI_ISL_696266	B.1.313	2020-05-13
USA|AZ-TG668340|EPI_ISL_696265|B.1.1.228|2020-05-13	USA	AZ-TG668340	EPI_ISL_696265	B.1.1.228	2020-05-13
United_Kingdom|QEUH-544733|EPI_ISL_533364|B.1.238|2020-05-14	United_Kingdom	QEUH-544733	EPI_ISL_533364	B.1.238	2020-05-14
Russia|OMS-ORINFI-7121S|EPI_ISL_569742|B.1.1.506|2020-05-14	Russia	OMS-ORINFI-7121S	EPI_ISL_569742	B.1.1.506	2020-05-14
Turkey|HSGM-2004082|EPI_ISL_814089|B.1.1.138|2020-05-15	Turkey	HSGM-2004082	EPI_ISL_814089	B.1.1.138	2020-05-15
United_Kingdom|SHEF-10B2E79|EPI_ISL_537248|B.1.173|2020-05-16	United_Kingdom	SHEF-10B2E79	EPI_ISL_537248	B.1.173	2020-05-16
Argentina|PAIS-F0040|EPI_ISL_981038|B.1.1.442|2020-05-16	Argentina	PAIS-F0040	EPI_ISL_981038	B.1.1.442	2020-05-16
Nigeria|BO-CV347|EPI_ISL_730012|B.1.467|2020-05-17	Nigeria	BO-CV347	EPI_ISL_730012	B.1.467	2020-05-17
USA|MA-MGH-03932|EPI_ISL_1011533|B.1.1.316|2020-05-17	USA	MA-MGH-03932	EPI_ISL_1011533	B.1.1.316	2020-05-17
United_Kingdom|LIVE-A3E9C|EPI_ISL_499956|B.1.1.95|2020-05-18	United_Kingdom	LIVE-A3E9C	EPI_ISL_499956	B.1.1.95	2020-05-18
United_Kingdom|SHEF-C80F5|EPI_ISL_529433|B.1.1.86|2020-05-19	United_Kingdom	SHEF-C80F5	EPI_ISL_529433	B.1.1.86	2020-05-19
USA|TX-DSHS-0912|EPI_ISL_602210|B.1.599|2020-05-20	USA	TX-DSHS-0912	EPI_ISL_602210	B.1.599	2020-05-20
USA|UT-UPHL-04478|EPI_ISL_525343|B.1.444|2020-05-21	USA	UT-UPHL-04478	EPI_ISL_525343	B.1.444	2020-05-21
USA|OR-PROV-535|EPI_ISL_1017469|B.1.357|2020-05-21	USA	OR-PROV-535	EPI_ISL_1017469	B.1.357	2020-05-21
South_Africa|KRISP-0143|EPI_ISL_467493|B.1.1.56|2020-05-21	South_Africa	KRISP-0143	EPI_ISL_467493	B.1.1.56	2020-05-21
United_Kingdom|BIRM-5FC59|EPI_ISL_473392|B.1.1.255|2020-05-21	United_Kingdom	BIRM-5FC59	EPI_ISL_473392	B.1.1.255	2020-05-21
United_Kingdom|ALDP-49F3BE|EPI_ISL_559611|B.1.1.45|2020-05-22	United_Kingdom	ALDP-49F3BE	EPI_ISL_559611	B.1.1.45	2020-05-22
Chile|RM-72850|EPI_ISL_746784|B.1.1.324|2020-05-22	Chile	RM-72850	EPI_ISL_746784	B.1.1.324	2020-05-22
USA|TX-HMH-3036|EPI_ISL_543949|B.1.1.230|2020-05-22	USA	TX-HMH-3036	EPI_ISL_543949	B.1.1.230	2020-05-22
Sweden|20-51697|EPI_ISL_510834|B.1.342|2020-05-23	Sweden	20-51697	EPI_ISL_510834	B.1.342	2020-05-23
Australia|WA189|EPI_ISL_596752|B.1.36.33|2020-05-23	Australia	WA189	EPI_ISL_596752	B.1.36.33	2020-05-23
Czech_Republic|NRL-6834|EPI_ISL_541333|B.1.1.266|2020-05-23	Czech_Republic	NRL-6834	EPI_ISL_541333	B.1.1.266	2020-05-23
India|TG-CCMB-GC1|EPI_ISL_528810|B.1.537|2020-05-24	India	TG-CCMB-GC1	EPI_ISL_528810	B.1.537	2020-05-24
Ghana|84182_S43|EPI_ISL_515104|B.1.1.404|2020-05-25	Ghana	84182_S43	EPI_ISL_515104	B.1.1.404	2020-05-25
Japan|PG-7972|EPI_ISL_687073|B.1.1|2020-05-26	Japan	PG-7972	EPI_ISL_687073	B.1.1	2020-05-26
USA|IL-IDPH-DEK-S-000843|EPI_ISL_1652426|B.1.305|2020-05-27	USA	IL-IDPH-DEK-S-000843	EPI_ISL_1652426	B.1.305	2020-05-27
Costa_Rica|HNN-0359|EPI_ISL_1517403|B.1.291|2020-05-31	Costa_Rica	HNN-0359	EPI_ISL_1517403	B.1.291	2020-05-31
Nigeria|NA-CV240|EPI_ISL_729926|B.1.1.484|2020-05-31	Nigeria	NA-CV240	EPI_ISL_729926	B.1.1.484	2020-05-31
USA|CO-CDPHE-2008022196|EPI_ISL_5848051|B.1.570|2020-07-30	USA	CO-CDPHE-2008022196	EPI_ISL_5848051	B.1.570	2020-07-30
USA|TX-HMH-MCoV-39881|EPI_ISL_2222591|B.1.1.222|2020-08-06	USA	TX-HMH-MCoV-39881	EPI_ISL_2222591	B.1.1.222	2020-08-06
Mexico|YUC-NYGC-39037-20|EPI_ISL_3151148|B.1.1.519|2020-08-28	Mexico	YUC-NYGC-39037-20	EPI_ISL_3151148	B.1.1.519	2020-08-28
USA|AZ-TG817040|EPI_ISL_1707400|B.1.1.222|2020-10-05	USA	AZ-TG817040	EPI_ISL_1707400	B.1.1.222	2020-10-05
Mexico|CMX-INER-IBT-167|EPI_ISL_1302194|B.1.1.222|2020-10-17	Mexico	CMX-INER-IBT-167	EPI_ISL_1302194	B.1.1.222	2020-10-17
Mexico|CMX-INMEGEN-03-11-130|EPI_ISL_3839090|B.1.1.519|2020-11-03	Mexico	CMX-INMEGEN-03-11-130	EPI_ISL_3839090	B.1.1.519	2020-11-03
USA|AZ-TG784754|EPI_ISL_1465065|B.1.1.222|2020-11-05	USA	AZ-TG784754	EPI_ISL_1465065	B.1.1.222	2020-11-05
USA|AZ-TG745884|EPI_ISL_1182416|B.1.1.519|2020-11-07	USA	AZ-TG745884	EPI_ISL_1182416	B.1.1.519	2020-11-07
Mexico|CMX-INER-IBT-0791|EPI_ISL_4888464|B.1.1.519|2020-11-10	Mexico	CMX-INER-IBT-0791	EPI_ISL_4888464	B.1.1.519	2020-11-10
Mexico|CMX-INMEGEN-02-09-18|EPI_ISL_1095516|B.1.1.519|2020-11-13	Mexico	CMX-INMEGEN-02-09-18	EPI_ISL_1095516	B.1.1.519	2020-11-13
Mexico|CMX-INER-IBT-0667|EPI_ISL_4496621|B.1.1.519|2020-11-15	Mexico	CMX-INER-IBT-0667	EPI_ISL_4496621	B.1.1.519	2020-11-15
Mexico|CMX-INMEGEN-12-03-13|EPI_ISL_955203|B.1.1.519|2020-11-18	Mexico	CMX-INMEGEN-12-03-13	EPI_ISL_955203	B.1.1.519	2020-11-18
Mexico|CMX-INMEGEN-03-10-80|EPI_ISL_3839095|B.1.1.519|2020-11-18	Mexico	CMX-INMEGEN-03-10-80	EPI_ISL_3839095	B.1.1.519	2020-11-18
Mexico|CMX-INMEGEN-12-03-23|EPI_ISL_955208|B.1.1.519|2020-11-19	Mexico	CMX-INMEGEN-12-03-23	EPI_ISL_955208	B.1.1.519	2020-11-19
Mexico|CMX-INMEGEN-12-04-01|EPI_ISL_1005559|B.1.1.519|2020-11-20	Mexico	CMX-INMEGEN-12-04-01	EPI_ISL_1005559	B.1.1.519	2020-11-20
Mexico|VER-InDRE_169|EPI_ISL_913970|B.1.1.519|2020-11-21	Mexico	VER-InDRE_169	EPI_ISL_913970	B.1.1.519	2020-11-21
Mexico|CMX-INER-IBT-71|EPI_ISL_1302301|B.1.1.519|2020-11-21	Mexico	CMX-INER-IBT-71	EPI_ISL_1302301	B.1.1.519	2020-11-21
USA|OR-OHSU-5785|EPI_ISL_832799|B.1.1.519|2020-11-23	USA	OR-OHSU-5785	EPI_ISL_832799	B.1.1.519	2020-11-23
Mexico|CMX-INER-IBT-0662|EPI_ISL_4496616|B.1.1.519|2020-11-23	Mexico	CMX-INER-IBT-0662	EPI_ISL_4496616	B.1.1.519	2020-11-23
Mexico|CMX-INER-IBT-74|EPI_ISL_1302307|B.1.1.519|2020-11-23	Mexico	CMX-INER-IBT-74	EPI_ISL_1302307	B.1.1.519	2020-11-23
Mexico|CMX-INER-IBT-0669|EPI_ISL_4496623|B.1.1.519|2020-11-26	Mexico	CMX-INER-IBT-0669	EPI_ISL_4496623	B.1.1.519	2020-11-26
Mexico|CMX-INER-IBT-79|EPI_ISL_1302159|B.1.1.519|2020-11-28	Mexico	CMX-INER-IBT-79	EPI_ISL_1302159	B.1.1.519	2020-11-28
Mexico|CMX-INMEGEN-11-13|EPI_ISL_933522|B.1.1.519|2020-11-30	Mexico	CMX-INMEGEN-11-13	EPI_ISL_933522	B.1.1.519	2020-11-30
Mexico|CMX-INMEGEN-11-12|EPI_ISL_933521|B.1.1.519|2020-11-30	Mexico	CMX-INMEGEN-11-12	EPI_ISL_933521	B.1.1.519	2020-11-30
Mexico|CMX-INMEGEN-11-11|EPI_ISL_933520|B.1.1.519|2020-11-30	Mexico	CMX-INMEGEN-11-11	EPI_ISL_933520	B.1.1.519	2020-11-30
Mexico|CMX-INER-IBT-0699|EPI_ISL_4496653|B.1.1.519|2020-12-01	Mexico	CMX-INER-IBT-0699	EPI_ISL_4496653	B.1.1.519	2020-12-01
Mexico|CMX-INER-IBT-0936|EPI_ISL_5194956|B.1.1.519|2020-12-01	Mexico	CMX-INER-IBT-0936	EPI_ISL_5194956	B.1.1.519	2020-12-01
Mexico|CMX-INER-IBT-0938|EPI_ISL_5194958|B.1.1.519|2020-12-03	Mexico	CMX-INER-IBT-0938	EPI_ISL_5194958	B.1.1.519	2020-12-03
Mexico|CMX-INER-IBT-0712|EPI_ISL_4496666|B.1.1.519|2020-12-03	Mexico	CMX-INER-IBT-0712	EPI_ISL_4496666	B.1.1.519	2020-12-03
Mexico|TLA-InDRE_174|EPI_ISL_913975|B.1.1.519|2020-12-04	Mexico	TLA-InDRE_174	EPI_ISL_913975	B.1.1.519	2020-12-04
Mexico|CMX-INER-IBT-0706|EPI_ISL_4496660|B.1.1.519|2020-12-04	Mexico	CMX-INER-IBT-0706	EPI_ISL_4496660	B.1.1.519	2020-12-04
Mexico|CMX-INER-IBT-100|EPI_ISL_1302391|B.1.1.519|2020-12-04	Mexico	CMX-INER-IBT-100	EPI_ISL_1302391	B.1.1.519	2020-12-04
Mexico|CMX-INER-IBT-94|EPI_ISL_1302394|B.1.1.519|2020-12-05	Mexico	CMX-INER-IBT-94	EPI_ISL_1302394	B.1.1.519	2020-12-05
USA|WA-UW-20120583293|EPI_ISL_3984267|B.1.1.519|2020-12-05	USA	WA-UW-20120583293	EPI_ISL_3984267	B.1.1.519	2020-12-05
Mexico|CMX-INER-IBT-0708|EPI_ISL_4496662|B.1.1.519|2020-12-05	Mexico	CMX-INER-IBT-0708	EPI_ISL_4496662	B.1.1.519	2020-12-05
USA|TX-HMH-MCoV-36939|EPI_ISL_2208197|B.1.1.519|2020-12-07	USA	TX-HMH-MCoV-36939	EPI_ISL_2208197	B.1.1.519	2020-12-07
Mexico|CMX-INER-IBT-98|EPI_ISL_1302383|B.1.1.519|2020-12-08	Mexico	CMX-INER-IBT-98	EPI_ISL_1302383	B.1.1.519	2020-12-08
Mexico|GRO-InDRE_173|EPI_ISL_913974|B.1.1.519|2020-12-09	Mexico	GRO-InDRE_173	EPI_ISL_913974	B.1.1.519	2020-12-09
Mexico|CMX-INER-IBT-177-NC|EPI_ISL_3463466|B.1.1.519|2020-12-09	Mexico	CMX-INER-IBT-177-NC	EPI_ISL_3463466	B.1.1.519	2020-12-09
Mexico|TLA-InDRE_176|EPI_ISL_913977|B.1.1.519|2020-12-10	Mexico	TLA-InDRE_176	EPI_ISL_913977	B.1.1.519	2020-12-10
Mexico|BCN-ALSR-6642|EPI_ISL_1081478|B.1.1.519|2020-12-10	Mexico	BCN-ALSR-6642	EPI_ISL_1081478	B.1.1.519	2020-12-10
Mexico|CMX-INER-IBT-0937|EPI_ISL_5194957|B.1.1.519|2020-12-10	Mexico	CMX-INER-IBT-0937	EPI_ISL_5194957	B.1.1.519	2020-12-10
Mexico|MEX-InDRE_177|EPI_ISL_913978|B.1.1.519|2020-12-12	Mexico	MEX-InDRE_177	EPI_ISL_913978	B.1.1.519	2020-12-12
Mexico|CMX-INER-IBT-0941|EPI_ISL_5194961|B.1.1.519|2020-12-12	Mexico	CMX-INER-IBT-0941	EPI_ISL_5194961	B.1.1.519	2020-12-12
USA|CA-CDPH-UC559|EPI_ISL_847645|B.1.1.519|2020-12-13	USA	CA-CDPH-UC559	EPI_ISL_847645	B.1.1.519	2020-12-13
Mexico|CMX-InDRE_160|EPI_ISL_913962|B.1.1.519|2020-12-14	Mexico	CMX-InDRE_160	EPI_ISL_913962	B.1.1.519	2020-12-14
Mexico|HGO-InDRE_183|EPI_ISL_913984|B.1.1.519|2020-12-14	Mexico	HGO-InDRE_183	EPI_ISL_913984	B.1.1.519	2020-12-14
Mexico|HGO-InDRE_181|EPI_ISL_913982|B.1.1.519|2020-12-14	Mexico	HGO-InDRE_181	EPI_ISL_913982	B.1.1.519	2020-12-14
Mexico|CMX-InDRE_179|EPI_ISL_913980|B.1.1.519|2020-12-15	Mexico	CMX-InDRE_179	EPI_ISL_913980	B.1.1.519	2020-12-15
Mexico|MEX-InDRE_226|EPI_ISL_933703|B.1.1.519|2020-12-15	Mexico	MEX-InDRE_226	EPI_ISL_933703	B.1.1.519	2020-12-15
USA|CA-CDPH-2000015484|EPI_ISL_5442902|B.1.1.519|2020-12-16	USA	CA-CDPH-2000015484	EPI_ISL_5442902	B.1.1.519	2020-12-16
Mexico|CMX-InDRE_222|EPI_ISL_933699|B.1.1.519|2020-12-17	Mexico	CMX-InDRE_222	EPI_ISL_933699	B.1.1.519	2020-12-17
Mexico|CMX-InDRE_223|EPI_ISL_933700|B.1.1.519|2020-12-17	Mexico	CMX-InDRE_223	EPI_ISL_933700	B.1.1.519	2020-12-17
Mexico|MEX-InDRE_182|EPI_ISL_913983|B.1.1.519|2020-12-17	Mexico	MEX-InDRE_182	EPI_ISL_913983	B.1.1.519	2020-12-17
Mexico|CMX-INMEGEN-12-04-23|EPI_ISL_1005581|B.1.1.519|2020-12-18	Mexico	CMX-INMEGEN-12-04-23	EPI_ISL_1005581	B.1.1.519	2020-12-18
Mexico|PUE-InDRE-IBT-158|EPI_ISL_1302380|B.1.1.519|2020-12-18	Mexico	PUE-InDRE-IBT-158	EPI_ISL_1302380	B.1.1.519	2020-12-18
Mexico|CMX-INMEGEN-12-04-24|EPI_ISL_1005582|B.1.1.519|2020-12-18	Mexico	CMX-INMEGEN-12-04-24	EPI_ISL_1005582	B.1.1.519	2020-12-18
Mexico|PUE-InDRE-IBT-205|EPI_ISL_1302218|B.1.1.519|2020-12-18	Mexico	PUE-InDRE-IBT-205	EPI_ISL_1302218	B.1.1.519	2020-12-18
Mexico|CMX-InDRE_217|EPI_ISL_933694|B.1.1.519|2020-12-19	Mexico	CMX-InDRE_217	EPI_ISL_933694	B.1.1.519	2020-12-19
Mexico|NLE-UANL-029|EPI_ISL_779190|B.1.1.519|2020-12-19	Mexico	NLE-UANL-029	EPI_ISL_779190	B.1.1.519	2020-12-19
USA|CA-LACPHL-AF00050|EPI_ISL_754125|B.1.1.519|2020-12-20	USA	CA-LACPHL-AF00050	EPI_ISL_754125	B.1.1.519	2020-12-20
Mexico|CMX-InDRE_218|EPI_ISL_933695|B.1.1.519|2020-12-20	Mexico	CMX-InDRE_218	EPI_ISL_933695	B.1.1.519	2020-12-20
Mexico|CMX-InDRE_220|EPI_ISL_933697|B.1.1.519|2020-12-20	Mexico	CMX-InDRE_220	EPI_ISL_933697	B.1.1.519	2020-12-20
Mexico|CMX-InDRE_225|EPI_ISL_933702|B.1.1.519|2020-12-20	Mexico	CMX-InDRE_225	EPI_ISL_933702	B.1.1.519	2020-12-20
Mexico|AGU-InDRE-IBT-210|EPI_ISL_1302177|B.1.1.519|2020-12-21	Mexico	AGU-InDRE-IBT-210	EPI_ISL_1302177	B.1.1.519	2020-12-21
Mexico|PUE-InDRE-IBT-308366-NC|EPI_ISL_3463572|B.1.1.519|2020-12-21	Mexico	PUE-InDRE-IBT-308366-NC	EPI_ISL_3463572	B.1.1.519	2020-12-21
Mexico|PUE-InDRE-IBT-182|EPI_ISL_1302286|B.1.1.519|2020-12-21	Mexico	PUE-InDRE-IBT-182	EPI_ISL_1302286	B.1.1.519	2020-12-21
Mexico|CMX-INMEGEN-12-04-07|EPI_ISL_1005565|B.1.1.519|2020-12-21	Mexico	CMX-INMEGEN-12-04-07	EPI_ISL_1005565	B.1.1.519	2020-12-21
Mexico|CMX-InDRE_221|EPI_ISL_933698|B.1.1.519|2020-12-21	Mexico	CMX-InDRE_221	EPI_ISL_933698	B.1.1.519	2020-12-21
Mexico|PUE-InDRE-IBT-164|EPI_ISL_1302188|B.1.1.519|2020-12-21	Mexico	PUE-InDRE-IBT-164	EPI_ISL_1302188	B.1.1.519	2020-12-21
Mexico|PUE-InDRE-IBT-204|EPI_ISL_1302217|B.1.1.519|2020-12-21	Mexico	PUE-InDRE-IBT-204	EPI_ISL_1302217	B.1.1.519	2020-12-21
Mexico|CMX-INMEGEN-12-04-05|EPI_ISL_1005563|B.1.1.519|2020-12-21	Mexico	CMX-INMEGEN-12-04-05	EPI_ISL_1005563	B.1.1.519	2020-12-21
Mexico|CHP-InDRE-IBT-196|EPI_ISL_1302310|B.1.1.519|2020-12-21	Mexico	CHP-InDRE-IBT-196	EPI_ISL_1302310	B.1.1.519	2020-12-21
Mexico|CMX-INMEGEN-12-04-21|EPI_ISL_1005579|B.1.1.519|2020-12-21	Mexico	CMX-INMEGEN-12-04-21	EPI_ISL_1005579	B.1.1.519	2020-12-21
Mexico|PUE-InDRE-IBT-308107-NC|EPI_ISL_3463530|B.1.1.519|2020-12-22	Mexico	PUE-InDRE-IBT-308107-NC	EPI_ISL_3463530	B.1.1.519	2020-12-22
USA|OR-OHSU-9008|EPI_ISL_905904|B.1.1.519|2020-12-22	USA	OR-OHSU-9008	EPI_ISL_905904	B.1.1.519	2020-12-22
Mexico|MOR-InDRE-IBT-147|EPI_ISL_1302162|B.1.1.519|2020-12-22	Mexico	MOR-InDRE-IBT-147	EPI_ISL_1302162	B.1.1.519	2020-12-22
Mexico|PUE-InDRE-IBT-166|EPI_ISL_1302212|B.1.1.519|2020-12-22	Mexico	PUE-InDRE-IBT-166	EPI_ISL_1302212	B.1.1.519	2020-12-22
Mexico|PUE-InDRE-IBT-170|EPI_ISL_1302333|B.1.1.519|2020-12-22	Mexico	PUE-InDRE-IBT-170	EPI_ISL_1302333	B.1.1.519	2020-12-22
Mexico|CMX-INMEGEN-12-04-20|EPI_ISL_1005578|B.1.1.519|2020-12-22	Mexico	CMX-INMEGEN-12-04-20	EPI_ISL_1005578	B.1.1.519	2020-12-22
Mexico|CMX-INMEGEN-12-04-16|EPI_ISL_1005574|B.1.1.222|2020-12-22	Mexico	CMX-INMEGEN-12-04-16	EPI_ISL_1005574	B.1.1.222	2020-12-22
Mexico|MOR-InDRE-IBT-148|EPI_ISL_1302382|B.1.1.519|2020-12-22	Mexico	MOR-InDRE-IBT-148	EPI_ISL_1302382	B.1.1.519	2020-12-22
Mexico|PUE-InDRE-IBT-154|EPI_ISL_1302210|B.1.1.519|2020-12-22	Mexico	PUE-InDRE-IBT-154	EPI_ISL_1302210	B.1.1.519	2020-12-22
Mexico|AGU-InDRE-IBT-212|EPI_ISL_1302337|B.1.1.519|2020-12-22	Mexico	AGU-InDRE-IBT-212	EPI_ISL_1302337	B.1.1.519	2020-12-22
Mexico|PUE-InDRE-IBT-149|EPI_ISL_1302397|B.1.1.519|2020-12-22	Mexico	PUE-InDRE-IBT-149	EPI_ISL_1302397	B.1.1.519	2020-12-22
Mexico|PUE-InDRE-IBT-175|EPI_ISL_1302323|B.1.1.519|2020-12-22	Mexico	PUE-InDRE-IBT-175	EPI_ISL_1302323	B.1.1.519	2020-12-22
Mexico|CMX-INMEGEN-12-04-17|EPI_ISL_1005575|B.1.1.519|2020-12-23	Mexico	CMX-INMEGEN-12-04-17	EPI_ISL_1005575	B.1.1.519	2020-12-23
Mexico|MOR-InDRE-IBT-308212-NC|EPI_ISL_3463568|B.1.1.519|2020-12-23	Mexico	MOR-InDRE-IBT-308212-NC	EPI_ISL_3463568	B.1.1.519	2020-12-23
USA|NY-Wadsworth-21013963-01|EPI_ISL_936165|B.1.1.519|2020-12-23	USA	NY-Wadsworth-21013963-01	EPI_ISL_936165	B.1.1.519	2020-12-23
Mexico|MOR-InDRE-IBT-308234-NC|EPI_ISL_3463411|B.1.1.519|2020-12-23	Mexico	MOR-InDRE-IBT-308234-NC	EPI_ISL_3463411	B.1.1.519	2020-12-23
Mexico|PUE-InDRE-IBT-167|EPI_ISL_1302321|B.1.1.519|2020-12-23	Mexico	PUE-InDRE-IBT-167	EPI_ISL_1302321	B.1.1.519	2020-12-23
Mexico|PUE-InDRE-IBT-174|EPI_ISL_1302322|B.1.1.519|2020-12-23	Mexico	PUE-InDRE-IBT-174	EPI_ISL_1302322	B.1.1.519	2020-12-23
Mexico|PUE-InDRE-IBT-168|EPI_ISL_1302213|B.1.1.519|2020-12-23	Mexico	PUE-InDRE-IBT-168	EPI_ISL_1302213	B.1.1.519	2020-12-23
Mexico|CMX-INMEGEN-12-04-13|EPI_ISL_1005571|B.1.1.519|2020-12-23	Mexico	CMX-INMEGEN-12-04-13	EPI_ISL_1005571	B.1.1.519	2020-12-23
Mexico|MOR-InDRE-IBT-189|EPI_ISL_1302340|B.1.1.519|2020-12-23	Mexico	MOR-InDRE-IBT-189	EPI_ISL_1302340	B.1.1.519	2020-12-23
Mexico|AGU-InDRE-IBT-216|EPI_ISL_1302202|B.1.1.519|2020-12-23	Mexico	AGU-InDRE-IBT-216	EPI_ISL_1302202	B.1.1.519	2020-12-23
Mexico|CMX-INMEGEN-12-04-19|EPI_ISL_1005577|B.1.1.519|2020-12-23	Mexico	CMX-INMEGEN-12-04-19	EPI_ISL_1005577	B.1.1.519	2020-12-23
Mexico|MOR-InDRE-IBT-187|EPI_ISL_1302175|B.1.1.519|2020-12-23	Mexico	MOR-InDRE-IBT-187	EPI_ISL_1302175	B.1.1.519	2020-12-23
Mexico|CMX-INMEGEN-01-01-24|EPI_ISL_1005673|B.1.1.519|2020-12-26	Mexico	CMX-INMEGEN-01-01-24	EPI_ISL_1005673	B.1.1.519	2020-12-26
Mexico|CMX-INMEGEN-06-03-9|EPI_ISL_2842800|B.1.1.519|2020-12-26	Mexico	CMX-INMEGEN-06-03-9	EPI_ISL_2842800	B.1.1.519	2020-12-26
USA|NY-CDC-LC00001303|EPI_ISL_888456|B.1.1.519|2020-12-27	USA	NY-CDC-LC00001303	EPI_ISL_888456	B.1.1.519	2020-12-27
USA|CA-CZB-29577|EPI_ISL_1701424|B.1.1.222|2020-12-27	USA	CA-CZB-29577	EPI_ISL_1701424	B.1.1.222	2020-12-27
Mexico|NLE-UANL-044|EPI_ISL_979336|B.1.1.519|2020-12-27	Mexico	NLE-UANL-044	EPI_ISL_979336	B.1.1.519	2020-12-27
USA|NY-Wadsworth-21013994-01|EPI_ISL_1227649|B.1.1.519|2020-12-28	USA	NY-Wadsworth-21013994-01	EPI_ISL_1227649	B.1.1.519	2020-12-28
Mexico|CMX-INER-IBT-0718|EPI_ISL_4496672|B.1.1.519|2020-12-28	Mexico	CMX-INER-IBT-0718	EPI_ISL_4496672	B.1.1.519	2020-12-28
USA|NY-PRL-2021_0611_51G12|EPI_ISL_2633060|B.1.1.519|2020-12-28	USA	NY-PRL-2021_0611_51G12	EPI_ISL_2633060	B.1.1.519	2020-12-28
USA|OR-OHSU-9079|EPI_ISL_2839044|B.1.1.519|2020-12-28	USA	OR-OHSU-9079	EPI_ISL_2839044	B.1.1.519	2020-12-28
USA|TX-HMH-MCoV-33842|EPI_ISL_2201924|B.1.1.519|2020-12-28	USA	TX-HMH-MCoV-33842	EPI_ISL_2201924	B.1.1.519	2020-12-28
Mexico|CMX-INMEGEN-05-01-194|EPI_ISL_2842792|B.1.1.519|2020-12-28	Mexico	CMX-INMEGEN-05-01-194	EPI_ISL_2842792	B.1.1.519	2020-12-28
Mexico|CMX-INMEGEN-01-02-10|EPI_ISL_985163|B.1.1.519|2020-12-30	Mexico	CMX-INMEGEN-01-02-10	EPI_ISL_985163	B.1.1.519	2020-12-30
Mexico|CMX-INMEGEN-01-02-01|EPI_ISL_985160|B.1.1.519|2020-12-30	Mexico	CMX-INMEGEN-01-02-01	EPI_ISL_985160	B.1.1.519	2020-12-30
Mexico|CMX-INMEGEN-01-02-02|EPI_ISL_985161|B.1.1.519|2020-12-30	Mexico	CMX-INMEGEN-01-02-02	EPI_ISL_985161	B.1.1.519	2020-12-30
Mexico|CMX-INMEGEN-01-01-16|EPI_ISL_1005666|B.1.1.519|2020-12-30	Mexico	CMX-INMEGEN-01-01-16	EPI_ISL_1005666	B.1.1.519	2020-12-30
Mexico|CMX-INMEGEN-01-02-09|EPI_ISL_985162|B.1.1.519|2020-12-30	Mexico	CMX-INMEGEN-01-02-09	EPI_ISL_985162	B.1.1.519	2020-12-30
Mexico|CMX-INMEGEN-01-02-13|EPI_ISL_985165|B.1.1.519|2020-12-30	Mexico	CMX-INMEGEN-01-02-13	EPI_ISL_985165	B.1.1.519	2020-12-30
Mexico|CMX-INMEGEN-05-01-201|EPI_ISL_2842797|B.1.1.519|2020-12-30	Mexico	CMX-INMEGEN-05-01-201	EPI_ISL_2842797	B.1.1.519	2020-12-30
Mexico|CMX-INER-IBT-114|EPI_ISL_1302400|B.1.1.519|2020-12-31	Mexico	CMX-INER-IBT-114	EPI_ISL_1302400	B.1.1.519	2020-12-31
Mexico|CMX-INER-IBT-110|EPI_ISL_1302334|B.1.1.519|2020-12-31	Mexico	CMX-INER-IBT-110	EPI_ISL_1302334	B.1.1.519	2020-12-31
Mexico|CMX-INMEGEN-01-02-15|EPI_ISL_985159|B.1.1.519|2020-12-31	Mexico	CMX-INMEGEN-01-02-15	EPI_ISL_985159	B.1.1.519	2020-12-31
USA|FL-BPHL-0052|EPI_ISL_935363|B.1.1.519|2021-01-02	USA	FL-BPHL-0052	EPI_ISL_935363	B.1.1.519	2021-01-02
USA|FL-BPHL-0050|EPI_ISL_935361|B.1.1.519|2021-01-02	USA	FL-BPHL-0050	EPI_ISL_935361	B.1.1.519	2021-01-02
Mexico|CMX-INMEGEN-01-02-18|EPI_ISL_985153|B.1.1.519|2021-01-02	Mexico	CMX-INMEGEN-01-02-18	EPI_ISL_985153	B.1.1.519	2021-01-02
SouthKorea|KDCA3654|EPI_ISL_2161141|B.1.1.222|2021-01-02	SouthKorea	KDCA3654	EPI_ISL_2161141	B.1.1.222	2021-01-02
USA|IL-CDC-LC0004092|EPI_ISL_886190|B.1.1.519|2021-01-02	USA	IL-CDC-LC0004092	EPI_ISL_886190	B.1.1.519	2021-01-02
USA|CA-CDPH-2000020706|EPI_ISL_3671850|B.1.1.519|2021-01-03	USA	CA-CDPH-2000020706	EPI_ISL_3671850	B.1.1.519	2021-01-03
Mexico|CMX-INER-IBT-0949|EPI_ISL_5194971|B.1.1.519|2021-01-03	Mexico	CMX-INER-IBT-0949	EPI_ISL_5194971	B.1.1.519	2021-01-03
Mexico|CMX-INER-IBT-0948|EPI_ISL_5194970|B.1.1.519|2021-01-03	Mexico	CMX-INER-IBT-0948	EPI_ISL_5194970	B.1.1.519	2021-01-03
USA|OR-TRACE-DESC-010421-008|EPI_ISL_1036263|B.1.1.519|2021-01-04	USA	OR-TRACE-DESC-010421-008	EPI_ISL_1036263	B.1.1.519	2021-01-04
USA|CA-CDPH-2000016824|EPI_ISL_2782630|B.1.1.519|2021-01-04	USA	CA-CDPH-2000016824	EPI_ISL_2782630	B.1.1.519	2021-01-04
USA|NY-NYGC-278-VTM1-SWPI566|EPI_ISL_2450664|B.1.1.519|2021-01-04	USA	NY-NYGC-278-VTM1-SWPI566	EPI_ISL_2450664	B.1.1.519	2021-01-04
Mexico|CMX-INER-IBT-0814|EPI_ISL_4888487|B.1.1.519|2021-01-04	Mexico	CMX-INER-IBT-0814	EPI_ISL_4888487	B.1.1.519	2021-01-04
USA|CA-CZB-29402|EPI_ISL_1663936|B.1.1.519|2021-01-04	USA	CA-CZB-29402	EPI_ISL_1663936	B.1.1.519	2021-01-04
Mexico|CMX-INMEGEN-01-02-22|EPI_ISL_985150|B.1.1.222|2021-01-04	Mexico	CMX-INMEGEN-01-02-22	EPI_ISL_985150	B.1.1.222	2021-01-04
Mexico|CMX-INER-IBT-120|EPI_ISL_1302228|B.1.1.222|2021-01-04	Mexico	CMX-INER-IBT-120	EPI_ISL_1302228	B.1.1.222	2021-01-04
Mexico|CMX-INER-IBT-0821|EPI_ISL_4888494|B.1.1.519|2021-01-05	Mexico	CMX-INER-IBT-0821	EPI_ISL_4888494	B.1.1.519	2021-01-05
Mexico|CMX-INER-IBT-238-NC|EPI_ISL_3463392|B.1.1.519|2021-01-05	Mexico	CMX-INER-IBT-238-NC	EPI_ISL_3463392	B.1.1.519	2021-01-05
USA|TX-HMH-MCoV-20637|EPI_ISL_1075079|B.1.1.519|2021-01-05	USA	TX-HMH-MCoV-20637	EPI_ISL_1075079	B.1.1.519	2021-01-05
Mexico|CMX-INER-IBT-0822|EPI_ISL_4888495|B.1.1.519|2021-01-05	Mexico	CMX-INER-IBT-0822	EPI_ISL_4888495	B.1.1.519	2021-01-05
Mexico|SLP-UASLP-AH1COV2SS019_S8|EPI_ISL_1494730|B.1.1.519|2021-01-05	Mexico	SLP-UASLP-AH1COV2SS019_S8	EPI_ISL_1494730	B.1.1.519	2021-01-05
Mexico|YUC-NYGC-928-21|EPI_ISL_3023876|B.1.1.519|2021-01-05	Mexico	YUC-NYGC-928-21	EPI_ISL_3023876	B.1.1.519	2021-01-05
Mexico|CMX-INER-IBT-127|EPI_ISL_1302198|B.1.1.519|2021-01-05	Mexico	CMX-INER-IBT-127	EPI_ISL_1302198	B.1.1.519	2021-01-05
USA|CA-CZB-27758|EPI_ISL_1477821|B.1.1.519|2021-01-06	USA	CA-CZB-27758	EPI_ISL_1477821	B.1.1.519	2021-01-06
USA|FL-BPHL-0055|EPI_ISL_935366|B.1.1.519|2021-01-06	USA	FL-BPHL-0055	EPI_ISL_935366	B.1.1.519	2021-01-06
Mexico|CMX-InDRE_203|EPI_ISL_933680|B.1.1.519|2021-01-06	Mexico	CMX-InDRE_203	EPI_ISL_933680	B.1.1.519	2021-01-06
USA|CA-SEARCH-13531|EPI_ISL_1813207|B.1.1.519|2021-01-06	USA	CA-SEARCH-13531	EPI_ISL_1813207	B.1.1.519	2021-01-06
USA|IN-CDC-STM-A100476|EPI_ISL_850706|B.1.1.519|2021-01-06	USA	IN-CDC-STM-A100476	EPI_ISL_850706	B.1.1.519	2021-01-06
Mexico|CMX-InDRE_212|EPI_ISL_933689|B.1.1.519|2021-01-07	Mexico	CMX-InDRE_212	EPI_ISL_933689	B.1.1.519	2021-01-07
USA|MD-MDH-2777|EPI_ISL_2709847|B.1.1.519|2021-01-07	USA	MD-MDH-2777	EPI_ISL_2709847	B.1.1.519	2021-01-07
Mexico|CMX-InDRE_209|EPI_ISL_933686|B.1.1.519|2021-01-07	Mexico	CMX-InDRE_209	EPI_ISL_933686	B.1.1.519	2021-01-07
Mexico|CMX-InDRE_208|EPI_ISL_933685|B.1.1.519|2021-01-07	Mexico	CMX-InDRE_208	EPI_ISL_933685	B.1.1.519	2021-01-07
Mexico|CMX-InDRE_210|EPI_ISL_933687|B.1.1.519|2021-01-07	Mexico	CMX-InDRE_210	EPI_ISL_933687	B.1.1.519	2021-01-07
Mexico|CMX-InDRE_206|EPI_ISL_933683|B.1.1.519|2021-01-07	Mexico	CMX-InDRE_206	EPI_ISL_933683	B.1.1.519	2021-01-07
USA|CA-CZB-24638|EPI_ISL_1185305|B.1.1.519|2021-01-08	USA	CA-CZB-24638	EPI_ISL_1185305	B.1.1.519	2021-01-08
USA|CA-CZB-24643|EPI_ISL_1185431|B.1.1.519|2021-01-08	USA	CA-CZB-24643	EPI_ISL_1185431	B.1.1.519	2021-01-08
USA|CA-QDX-3976|EPI_ISL_906419|B.1.1.519|2021-01-08	USA	CA-QDX-3976	EPI_ISL_906419	B.1.1.519	2021-01-08
Mexico|CMX-INER-IBT-0950|EPI_ISL_5194972|B.1.1.519|2021-01-08	Mexico	CMX-INER-IBT-0950	EPI_ISL_5194972	B.1.1.519	2021-01-08
Mexico|CMX-INER-IBT-0836|EPI_ISL_4888508|B.1.1.519|2021-01-08	Mexico	CMX-INER-IBT-0836	EPI_ISL_4888508	B.1.1.519	2021-01-08
USA|NY-NYCPHL-002315|EPI_ISL_857144|B.1.1.519|2021-01-08	USA	NY-NYCPHL-002315	EPI_ISL_857144	B.1.1.519	2021-01-08
Mexico|CMX-InDRE_213|EPI_ISL_933690|B.1.1.519|2021-01-08	Mexico	CMX-InDRE_213	EPI_ISL_933690	B.1.1.519	2021-01-08
Mexico|CMX-INER-IBT-0824|EPI_ISL_4888497|B.1.1.519|2021-01-08	Mexico	CMX-INER-IBT-0824	EPI_ISL_4888497	B.1.1.519	2021-01-08
USA|CA-CDPH-2000018447|EPI_ISL_2783322|B.1.1.519|2021-01-08	USA	CA-CDPH-2000018447	EPI_ISL_2783322	B.1.1.519	2021-01-08
Mexico|CMX-INMEGEN-01-03-15|EPI_ISL_944625|B.1.1.519|2021-01-08	Mexico	CMX-INMEGEN-01-03-15	EPI_ISL_944625	B.1.1.519	2021-01-08
Mexico|NLE-UANL-006|EPI_ISL_979343|B.1.1.519|2021-01-08	Mexico	NLE-UANL-006	EPI_ISL_979343	B.1.1.519	2021-01-08
USA|CA-QDX-3843|EPI_ISL_906323|B.1.1.519|2021-01-09	USA	CA-QDX-3843	EPI_ISL_906323	B.1.1.519	2021-01-09
USA|TX-HMH-MCoV-22232|EPI_ISL_1076760|B.1.1.519|2021-01-09	USA	TX-HMH-MCoV-22232	EPI_ISL_1076760	B.1.1.519	2021-01-09
USA|TX-HMH-MCoV-21667|EPI_ISL_1076114|B.1.1.519|2021-01-09	USA	TX-HMH-MCoV-21667	EPI_ISL_1076114	B.1.1.519	2021-01-09
USA|NY-Wadsworth-21019258-01|EPI_ISL_1227291|B.1.1.519|2021-01-10	USA	NY-Wadsworth-21019258-01	EPI_ISL_1227291	B.1.1.519	2021-01-10
Mexico|CMX-INMEGEN-01-03-13|EPI_ISL_944623|B.1.1.519|2021-01-10	Mexico	CMX-INMEGEN-01-03-13	EPI_ISL_944623	B.1.1.519	2021-01-10
USA|CA-CDPH-2000024419|EPI_ISL_5695725|B.1.1.519|2021-01-11	USA	CA-CDPH-2000024419	EPI_ISL_5695725	B.1.1.519	2021-01-11
USA|NY-NYGC-391-VTM1-SKRL028|EPI_ISL_2402870|B.1.1.519|2021-01-11	USA	NY-NYGC-391-VTM1-SKRL028	EPI_ISL_2402870	B.1.1.519	2021-01-11
USA|CA-SEARCH-12811|EPI_ISL_1812979|B.1.1.519|2021-01-11	USA	CA-SEARCH-12811	EPI_ISL_1812979	B.1.1.519	2021-01-11
Mexico|CMX-INMEGEN-01-03-03|EPI_ISL_944613|B.1.1.519|2021-01-11	Mexico	CMX-INMEGEN-01-03-03	EPI_ISL_944613	B.1.1.519	2021-01-11
Mexico|CMX-INMEGEN-01-03-18|EPI_ISL_944628|B.1.1.519|2021-01-11	Mexico	CMX-INMEGEN-01-03-18	EPI_ISL_944628	B.1.1.519	2021-01-11
USA|TX-HMH-MCoV-22999|EPI_ISL_1077529|B.1.1.519|2021-01-11	USA	TX-HMH-MCoV-22999	EPI_ISL_1077529	B.1.1.519	2021-01-11
Mexico|CMX-INER-IBT-0843|EPI_ISL_4888515|B.1.1.519|2021-01-11	Mexico	CMX-INER-IBT-0843	EPI_ISL_4888515	B.1.1.519	2021-01-11
USA|TX-HMH-MCoV-22958|EPI_ISL_1077488|B.1.1.519|2021-01-11	USA	TX-HMH-MCoV-22958	EPI_ISL_1077488	B.1.1.519	2021-01-11
Mexico|SLP-UASLP-AH1COV2SS018_S7|EPI_ISL_1494729|B.1.1.519|2021-01-11	Mexico	SLP-UASLP-AH1COV2SS018_S7	EPI_ISL_1494729	B.1.1.519	2021-01-11
USA|CA-UCSF-JD609|EPI_ISL_1094187|B.1.1.519|2021-01-12	USA	CA-UCSF-JD609	EPI_ISL_1094187	B.1.1.519	2021-01-12
USA|UT-UPHL-210812300904|EPI_ISL_3448934|B.1.1.519|2021-01-12	USA	UT-UPHL-210812300904	EPI_ISL_3448934	B.1.1.519	2021-01-12
Mexico|CMX-INMEGEN-01-03-16|EPI_ISL_944626|B.1.1.519|2021-01-12	Mexico	CMX-INMEGEN-01-03-16	EPI_ISL_944626	B.1.1.519	2021-01-12
USA|TX-HMH-MCoV-23263|EPI_ISL_1077793|B.1.1.519|2021-01-12	USA	TX-HMH-MCoV-23263	EPI_ISL_1077793	B.1.1.519	2021-01-12
India|MH-NCCS-154558|EPI_ISL_1384826|B.1.1.306|2021-01-12	India	MH-NCCS-154558	EPI_ISL_1384826	B.1.1.306	2021-01-12
USA|OR-OHSU-9626|EPI_ISL_1122248|B.1.1.519|2021-01-12	USA	OR-OHSU-9626	EPI_ISL_1122248	B.1.1.519	2021-01-12
Mexico|CMX-INMEGEN-01-03-07|EPI_ISL_944617|B.1.1.519|2021-01-12	Mexico	CMX-INMEGEN-01-03-07	EPI_ISL_944617	B.1.1.519	2021-01-12
Mexico|YUC-NYGC-3599-21|EPI_ISL_3024008|B.1.1.519|2021-01-13	Mexico	YUC-NYGC-3599-21	EPI_ISL_3024008	B.1.1.519	2021-01-13
USA|LA-BIE-LSUH000843|EPI_ISL_2690173|B.1.1.519|2021-01-13	USA	LA-BIE-LSUH000843	EPI_ISL_2690173	B.1.1.519	2021-01-13
USA|LA-BIE-LSUH000894E2S1|EPI_ISL_2663181|B.1.1.519|2021-01-13	USA	LA-BIE-LSUH000894E2S1	EPI_ISL_2663181	B.1.1.519	2021-01-13
USA|TX-HMH-MCoV-23603|EPI_ISL_1078133|B.1.1.519|2021-01-13	USA	TX-HMH-MCoV-23603	EPI_ISL_1078133	B.1.1.519	2021-01-13
USA|TX-HMH-MCoV-23578|EPI_ISL_1078108|B.1.1.519|2021-01-13	USA	TX-HMH-MCoV-23578	EPI_ISL_1078108	B.1.1.519	2021-01-13
USA|UT-UPHL-210722205146|EPI_ISL_3144847|B.1.1.519|2021-01-13	USA	UT-UPHL-210722205146	EPI_ISL_3144847	B.1.1.519	2021-01-13
USA|CO-CDPHE-2100230174|EPI_ISL_954941|B.1.1.519|2021-01-13	USA	CO-CDPHE-2100230174	EPI_ISL_954941	B.1.1.519	2021-01-13
USA|MD-MDH-2992|EPI_ISL_2955533|B.1.1.519|2021-01-13	USA	MD-MDH-2992	EPI_ISL_2955533	B.1.1.519	2021-01-13
USA|TX-DSHS-2642|EPI_ISL_1168223|B.1.1.519|2021-01-13	USA	TX-DSHS-2642	EPI_ISL_1168223	B.1.1.519	2021-01-13
USA|CA-CDPH-2000025217|EPI_ISL_3127461|B.1.1.519|2021-01-13	USA	CA-CDPH-2000025217	EPI_ISL_3127461	B.1.1.519	2021-01-13
USA|CA-CDPH-2000025262|EPI_ISL_3127500|B.1.1.519|2021-01-13	USA	CA-CDPH-2000025262	EPI_ISL_3127500	B.1.1.519	2021-01-13
USA|CA-CDPH-2000025677|EPI_ISL_3670055|B.1.1.519|2021-01-13	USA	CA-CDPH-2000025677	EPI_ISL_3670055	B.1.1.519	2021-01-13
USA|CA-CDPH-2000023542|EPI_ISL_3128220|B.1.1.519|2021-01-13	USA	CA-CDPH-2000023542	EPI_ISL_3128220	B.1.1.519	2021-01-13
USA|NY-Wadsworth-21028716-01|EPI_ISL_1624036|B.1.1.519|2021-01-14	USA	NY-Wadsworth-21028716-01	EPI_ISL_1624036	B.1.1.519	2021-01-14
USA|CA-SEARCH-15370|EPI_ISL_1813992|B.1.1.519|2021-01-14	USA	CA-SEARCH-15370	EPI_ISL_1813992	B.1.1.519	2021-01-14
USA|WA-S3635|EPI_ISL_891061|B.1.1.519|2021-01-14	USA	WA-S3635	EPI_ISL_891061	B.1.1.519	2021-01-14
Mexico|CMX-INMEGEN-01-05-17|EPI_ISL_1040598|B.1.1.519|2021-01-14	Mexico	CMX-INMEGEN-01-05-17	EPI_ISL_1040598	B.1.1.519	2021-01-14
USA|CA-CDPH-2000025925|EPI_ISL_3304092|B.1.1.519|2021-01-14	USA	CA-CDPH-2000025925	EPI_ISL_3304092	B.1.1.519	2021-01-14
USA|TX-HMH-MCoV-23661|EPI_ISL_1078191|B.1.1.519|2021-01-14	USA	TX-HMH-MCoV-23661	EPI_ISL_1078191	B.1.1.519	2021-01-14
USA|NY-Wadsworth-21028689-01|EPI_ISL_1624019|B.1.1.519|2021-01-14	USA	NY-Wadsworth-21028689-01	EPI_ISL_1624019	B.1.1.519	2021-01-14
USA|UT-UPHL-2101584863|EPI_ISL_943953|B.1.1.519|2021-01-14	USA	UT-UPHL-2101584863	EPI_ISL_943953	B.1.1.519	2021-01-14
USA|UT-UPHL-210628219858|EPI_ISL_2858209|B.1.1.519|2021-01-14	USA	UT-UPHL-210628219858	EPI_ISL_2858209	B.1.1.519	2021-01-14
USA|NY-Wadsworth-21028724-01|EPI_ISL_1624043|B.1.1.519|2021-01-14	USA	NY-Wadsworth-21028724-01	EPI_ISL_1624043	B.1.1.519	2021-01-14
USA|UT-UPHL-2105672782|EPI_ISL_2291136|B.1.1.222|2021-01-14	USA	UT-UPHL-2105672782	EPI_ISL_2291136	B.1.1.222	2021-01-14
USA|CA-CDPH-2000025785|EPI_ISL_3669447|B.1.1.519|2021-01-14	USA	CA-CDPH-2000025785	EPI_ISL_3669447	B.1.1.519	2021-01-14
Mexico|QUE-InDRE_246|EPI_ISL_1060697|B.1.1.519|2021-01-14	Mexico	QUE-InDRE_246	EPI_ISL_1060697	B.1.1.519	2021-01-14
USA|CA-ALSR-6868|EPI_ISL_1081674|B.1.1.519|2021-01-14	USA	CA-ALSR-6868	EPI_ISL_1081674	B.1.1.519	2021-01-14
USA|CA-CDPH-2000025347|EPI_ISL_3127575|B.1.1.519|2021-01-14	USA	CA-CDPH-2000025347	EPI_ISL_3127575	B.1.1.519	2021-01-14
USA|CA-CDPH-2000026237|EPI_ISL_3304625|B.1.1.519|2021-01-14	USA	CA-CDPH-2000026237	EPI_ISL_3304625	B.1.1.519	2021-01-14
USA|TX-HMH-MCoV-23974|EPI_ISL_1078504|B.1.1.519|2021-01-14	USA	TX-HMH-MCoV-23974	EPI_ISL_1078504	B.1.1.519	2021-01-14
Mexico|CMX-INMEGEN-01-05-18|EPI_ISL_1040597|B.1.1.519|2021-01-15	Mexico	CMX-INMEGEN-01-05-18	EPI_ISL_1040597	B.1.1.519	2021-01-15
Mexico|CMX-INMEGEN-01-05-03|EPI_ISL_1040594|B.1.1.519|2021-01-15	Mexico	CMX-INMEGEN-01-05-03	EPI_ISL_1040594	B.1.1.519	2021-01-15
USA|NM-UNM-EDB00122|EPI_ISL_877154|B.1.1.519|2021-01-15	USA	NM-UNM-EDB00122	EPI_ISL_877154	B.1.1.519	2021-01-15
Mexico|YUC-NYGC-4346-21|EPI_ISL_3023875|B.1.1.519|2021-01-15	Mexico	YUC-NYGC-4346-21	EPI_ISL_3023875	B.1.1.519	2021-01-15
USA|CA-CDPH-2000026316|EPI_ISL_3304699|B.1.1.519|2021-01-15	USA	CA-CDPH-2000026316	EPI_ISL_3304699	B.1.1.519	2021-01-15
USA|CA-CDPH-2000017705|EPI_ISL_3332682|B.1.1.519|2021-01-15	USA	CA-CDPH-2000017705	EPI_ISL_3332682	B.1.1.519	2021-01-15
USA|CA-UCSF-JD355|EPI_ISL_1094051|B.1.1.519|2021-01-15	USA	CA-UCSF-JD355	EPI_ISL_1094051	B.1.1.519	2021-01-15
USA|OR-OHSU-9956|EPI_ISL_1541261|B.1.1.519|2021-01-15	USA	OR-OHSU-9956	EPI_ISL_1541261	B.1.1.519	2021-01-15
USA|WA-S4448|EPI_ISL_1015791|B.1.1.519|2021-01-15	USA	WA-S4448	EPI_ISL_1015791	B.1.1.519	2021-01-15
USA|UT-UPHL-2105544532|EPI_ISL_2292188|B.1.1.222|2021-01-15	USA	UT-UPHL-2105544532	EPI_ISL_2292188	B.1.1.222	2021-01-15
Mexico|MOR-InDRE_465|EPI_ISL_1168535|B.1.1.519|2021-01-15	Mexico	MOR-InDRE_465	EPI_ISL_1168535	B.1.1.519	2021-01-15
Spain|VC-VAHNSI-GIHSN-07_0402|EPI_ISL_7174143|B.1.1.519|2021-01-15	Spain	VC-VAHNSI-GIHSN-07_0402	EPI_ISL_7174143	B.1.1.519	2021-01-15
USA|CA-ALSR-6847|EPI_ISL_1081657|B.1.1.519|2021-01-15	USA	CA-ALSR-6847	EPI_ISL_1081657	B.1.1.519	2021-01-15
USA|NY-Wadsworth-21012076-01|EPI_ISL_1227315|B.1.1.519|2021-01-15	USA	NY-Wadsworth-21012076-01	EPI_ISL_1227315	B.1.1.519	2021-01-15
USA|MN-MDH-2746|EPI_ISL_1027276|B.1.1.519|2021-01-15	USA	MN-MDH-2746	EPI_ISL_1027276	B.1.1.519	2021-01-15
USA|CA-CDPH-2000026338|EPI_ISL_3304720|B.1.1.519|2021-01-15	USA	CA-CDPH-2000026338	EPI_ISL_3304720	B.1.1.519	2021-01-15
Mexico|MOR-InDRE_462|EPI_ISL_1168532|B.1.1.519|2021-01-15	Mexico	MOR-InDRE_462	EPI_ISL_1168532	B.1.1.519	2021-01-15
USA|OR-OHSU-9979|EPI_ISL_1541283|B.1.1.519|2021-01-15	USA	OR-OHSU-9979	EPI_ISL_1541283	B.1.1.519	2021-01-15
Spain|PV-IBV-98015004|EPI_ISL_1423899|B.1.1.519|2021-01-15	Spain	PV-IBV-98015004	EPI_ISL_1423899	B.1.1.519	2021-01-15
Mexico|HID-InDRE_461|EPI_ISL_1168531|B.1.1.519|2021-01-16	Mexico	HID-InDRE_461	EPI_ISL_1168531	B.1.1.519	2021-01-16
USA|WA-S3650|EPI_ISL_891076|B.1.1.519|2021-01-16	USA	WA-S3650	EPI_ISL_891076	B.1.1.519	2021-01-16
USA|CA-CDPH-2000031206|EPI_ISL_2782390|B.1.1.519|2021-01-16	USA	CA-CDPH-2000031206	EPI_ISL_2782390	B.1.1.519	2021-01-16
Mexico|QUE-InDRE_475|EPI_ISL_1168545|B.1.1.519|2021-01-16	Mexico	QUE-InDRE_475	EPI_ISL_1168545	B.1.1.519	2021-01-16
USA|UT-UPHL-2104069891|EPI_ISL_1910661|B.1.1.519|2021-01-16	USA	UT-UPHL-2104069891	EPI_ISL_1910661	B.1.1.519	2021-01-16
USA|UT-UPHL-2105777781|EPI_ISL_2290557|B.1.1.519|2021-01-16	USA	UT-UPHL-2105777781	EPI_ISL_2290557	B.1.1.519	2021-01-16
Mexico|CMX-INMEGEN-01-05-01|EPI_ISL_1040591|B.1.1.519|2021-01-16	Mexico	CMX-INMEGEN-01-05-01	EPI_ISL_1040591	B.1.1.519	2021-01-16
USA|CA-CZB-25551|EPI_ISL_1234730|B.1.1.519|2021-01-16	USA	CA-CZB-25551	EPI_ISL_1234730	B.1.1.519	2021-01-16
USA|CA-CDPH-2000031347|EPI_ISL_2796726|B.1.1.519|2021-01-16	USA	CA-CDPH-2000031347	EPI_ISL_2796726	B.1.1.519	2021-01-16
USA|CA-CDPH-2000026515|EPI_ISL_3304871|B.1.1.519|2021-01-16	USA	CA-CDPH-2000026515	EPI_ISL_3304871	B.1.1.519	2021-01-16
USA|CA-CDC-LC0005784|EPI_ISL_1022127|B.1.1.519|2021-01-16	USA	CA-CDC-LC0005784	EPI_ISL_1022127	B.1.1.519	2021-01-16
USA|CA-SEARCH-12366|EPI_ISL_1811870|B.1.1.519|2021-01-16	USA	CA-SEARCH-12366	EPI_ISL_1811870	B.1.1.519	2021-01-16
USA|LA-CDC-LC0006302|EPI_ISL_1021818|B.1.1.519|2021-01-17	USA	LA-CDC-LC0006302	EPI_ISL_1021818	B.1.1.519	2021-01-17
Mexico|CAM-InDRE_544|EPI_ISL_1168614|B.1.1.519|2021-01-17	Mexico	CAM-InDRE_544	EPI_ISL_1168614	B.1.1.519	2021-01-17
USA|CA-CDPH-2000028783|EPI_ISL_2977757|B.1.1.519|2021-01-17	USA	CA-CDPH-2000028783	EPI_ISL_2977757	B.1.1.519	2021-01-17
USA|CA-CDPH-2000027932|EPI_ISL_2776316|B.1.1.519|2021-01-17	USA	CA-CDPH-2000027932	EPI_ISL_2776316	B.1.1.519	2021-01-17
Mexico|CMX-INMEGEN-02-01-03|EPI_ISL_1040622|B.1.1.519|2021-01-17	Mexico	CMX-INMEGEN-02-01-03	EPI_ISL_1040622	B.1.1.519	2021-01-17
USA|CA-CDPH-2000027531|EPI_ISL_2797494|B.1.1.519|2021-01-17	USA	CA-CDPH-2000027531	EPI_ISL_2797494	B.1.1.519	2021-01-17
USA|TX-HMH-MCoV-24335|EPI_ISL_1078889|B.1.1.519|2021-01-17	USA	TX-HMH-MCoV-24335	EPI_ISL_1078889	B.1.1.519	2021-01-17
Mexico|CMX-INER-IBT-0848|EPI_ISL_4888520|B.1.1.519|2021-01-17	Mexico	CMX-INER-IBT-0848	EPI_ISL_4888520	B.1.1.519	2021-01-17
USA|CA-CDPH-2000028812|EPI_ISL_2977784|B.1.1.519|2021-01-18	USA	CA-CDPH-2000028812	EPI_ISL_2977784	B.1.1.519	2021-01-18
USA|CA-CDPH-2000028813|EPI_ISL_2977785|B.1.1.519|2021-01-18	USA	CA-CDPH-2000028813	EPI_ISL_2977785	B.1.1.519	2021-01-18
Mexico|CMX-INMEGEN-01-04-06|EPI_ISL_1040567|B.1.1.519|2021-01-18	Mexico	CMX-INMEGEN-01-04-06	EPI_ISL_1040567	B.1.1.519	2021-01-18
USA|CA-CDPH-2000028772|EPI_ISL_2977746|B.1.1.519|2021-01-18	USA	CA-CDPH-2000028772	EPI_ISL_2977746	B.1.1.519	2021-01-18
USA|CA-CDPH-2000028765|EPI_ISL_2977739|B.1.1.519|2021-01-18	USA	CA-CDPH-2000028765	EPI_ISL_2977739	B.1.1.519	2021-01-18
USA|UT-UPHL-2104601235|EPI_ISL_2678328|B.1.1.519|2021-01-18	USA	UT-UPHL-2104601235	EPI_ISL_2678328	B.1.1.519	2021-01-18
Mexico|COA-InDRE_497|EPI_ISL_1168567|B.1.1.519|2021-01-18	Mexico	COA-InDRE_497	EPI_ISL_1168567	B.1.1.519	2021-01-18
Mexico|CMX-INMEGEN-01-05-14|EPI_ISL_1040588|B.1.1.519|2021-01-18	Mexico	CMX-INMEGEN-01-05-14	EPI_ISL_1040588	B.1.1.519	2021-01-18
Mexico|CMX-INMEGEN-01-04-17|EPI_ISL_1040571|B.1.1.519|2021-01-18	Mexico	CMX-INMEGEN-01-04-17	EPI_ISL_1040571	B.1.1.519	2021-01-18
Mexico|CMX-INMEGEN-01-04-05|EPI_ISL_1040566|B.1.1.519|2021-01-18	Mexico	CMX-INMEGEN-01-04-05	EPI_ISL_1040566	B.1.1.519	2021-01-18
Mexico|CMX-INMEGEN-01-05-16|EPI_ISL_1040590|B.1.1.519|2021-01-18	Mexico	CMX-INMEGEN-01-05-16	EPI_ISL_1040590	B.1.1.519	2021-01-18
USA|CA-CDPH-2000028298|EPI_ISL_2976687|B.1.1.519|2021-01-18	USA	CA-CDPH-2000028298	EPI_ISL_2976687	B.1.1.519	2021-01-18
USA|CA-CDPH-2000028829|EPI_ISL_2977799|B.1.1.519|2021-01-18	USA	CA-CDPH-2000028829	EPI_ISL_2977799	B.1.1.519	2021-01-18
USA|UT-UPHL-2103072750|EPI_ISL_1483140|B.1.1.519|2021-01-19	USA	UT-UPHL-2103072750	EPI_ISL_1483140	B.1.1.519	2021-01-19
USA|NC-CDC-STM-000004115|EPI_ISL_967471|B.1.1.519|2021-01-19	USA	NC-CDC-STM-000004115	EPI_ISL_967471	B.1.1.519	2021-01-19
USA|CA-CDPH-2000029863|EPI_ISL_2977876|B.1.1.519|2021-01-19	USA	CA-CDPH-2000029863	EPI_ISL_2977876	B.1.1.519	2021-01-19
USA|CO-CDPHE-2100254853|EPI_ISL_955034|B.1.1.519|2021-01-19	USA	CO-CDPHE-2100254853	EPI_ISL_955034	B.1.1.519	2021-01-19
USA|NY-Wadsworth-21026100-01|EPI_ISL_1395716|B.1.1.519|2021-01-19	USA	NY-Wadsworth-21026100-01	EPI_ISL_1395716	B.1.1.519	2021-01-19
USA|UT-UPHL-2103005065|EPI_ISL_1313861|B.1.1.519|2021-01-19	USA	UT-UPHL-2103005065	EPI_ISL_1313861	B.1.1.519	2021-01-19
USA|CA-CDPH-2000029639|EPI_ISL_3090420|B.1.1.519|2021-01-19	USA	CA-CDPH-2000029639	EPI_ISL_3090420	B.1.1.519	2021-01-19
USA|NY-Wadsworth-21026090-01|EPI_ISL_1623993|B.1.1.519|2021-01-19	USA	NY-Wadsworth-21026090-01	EPI_ISL_1623993	B.1.1.519	2021-01-19
USA|CA-CDPH-2000030712|EPI_ISL_3101841|B.1.1.519|2021-01-19	USA	CA-CDPH-2000030712	EPI_ISL_3101841	B.1.1.519	2021-01-19
USA|CA-CDPH-2000030508|EPI_ISL_3101666|B.1.1.519|2021-01-19	USA	CA-CDPH-2000030508	EPI_ISL_3101666	B.1.1.519	2021-01-19
Mexico|JAL-InDRE_426|EPI_ISL_1168504|B.1.1.519|2021-01-19	Mexico	JAL-InDRE_426	EPI_ISL_1168504	B.1.1.519	2021-01-19
USA|UT-UPHL-2105197170|EPI_ISL_2291877|B.1.1.519|2021-01-19	USA	UT-UPHL-2105197170	EPI_ISL_2291877	B.1.1.519	2021-01-19
USA|CA-SEARCH-15646|EPI_ISL_1812429|B.1.1.519|2021-01-19	USA	CA-SEARCH-15646	EPI_ISL_1812429	B.1.1.519	2021-01-19
Mexico|CMX-INMEGEN-01-05-21|EPI_ISL_1040599|B.1.1.519|2021-01-19	Mexico	CMX-INMEGEN-01-05-21	EPI_ISL_1040599	B.1.1.519	2021-01-19
Mexico|MOR-InDRE_524|EPI_ISL_1168594|B.1.1.519|2021-01-19	Mexico	MOR-InDRE_524	EPI_ISL_1168594	B.1.1.519	2021-01-19
Mexico|QUE-InDRE_554|EPI_ISL_1168624|B.1.1.519|2021-01-20	Mexico	QUE-InDRE_554	EPI_ISL_1168624	B.1.1.519	2021-01-20
Mexico|CMX-INMEGEN-01-04-19|EPI_ISL_1040576|B.1.1.519|2021-01-20	Mexico	CMX-INMEGEN-01-04-19	EPI_ISL_1040576	B.1.1.519	2021-01-20
USA|CA-CDPH-2000030754|EPI_ISL_3101881|B.1.1.519|2021-01-20	USA	CA-CDPH-2000030754	EPI_ISL_3101881	B.1.1.519	2021-01-20
USA|NY-Wadsworth-21014710-01|EPI_ISL_1397393|B.1.1.519|2021-01-20	USA	NY-Wadsworth-21014710-01	EPI_ISL_1397393	B.1.1.519	2021-01-20
USA|MD-HP01543|EPI_ISL_911861|B.1.1.519|2021-01-20	USA	MD-HP01543	EPI_ISL_911861	B.1.1.519	2021-01-20
Mexico|SLP_UASLP_A009|EPI_ISL_1469119|B.1.1.519|2021-01-20	Mexico	SLP_UASLP_A009	EPI_ISL_1469119	B.1.1.519	2021-01-20
USA|CO-CDPHE-2100249853|EPI_ISL_954887|B.1.1.519|2021-01-20	USA	CO-CDPHE-2100249853	EPI_ISL_954887	B.1.1.519	2021-01-20
Mexico|CMX-INMEGEN-01-05-13|EPI_ISL_1040579|B.1.1.222|2021-01-20	Mexico	CMX-INMEGEN-01-05-13	EPI_ISL_1040579	B.1.1.222	2021-01-20
Mexico|SLP_UASLP_A007|EPI_ISL_1469117|B.1.1.519|2021-01-20	Mexico	SLP_UASLP_A007	EPI_ISL_1469117	B.1.1.519	2021-01-20
USA|AZ-ASU16526|EPI_ISL_4968319|B.1.1.519|2021-01-21	USA	AZ-ASU16526	EPI_ISL_4968319	B.1.1.519	2021-01-21
Mexico|BCN-SEARCH-103120|EPI_ISL_2835545|B.1.1.519|2021-01-21	Mexico	BCN-SEARCH-103120	EPI_ISL_2835545	B.1.1.519	2021-01-21
USA|CA-SEARCH-13453|EPI_ISL_1812028|B.1.1.519|2021-01-21	USA	CA-SEARCH-13453	EPI_ISL_1812028	B.1.1.519	2021-01-21
Mexico|MOR-InDRE_529|EPI_ISL_1168599|B.1.1.519|2021-01-21	Mexico	MOR-InDRE_529	EPI_ISL_1168599	B.1.1.519	2021-01-21
Mexico|CMX-INMEGEN-01-04-20|EPI_ISL_1040577|B.1.1.519|2021-01-21	Mexico	CMX-INMEGEN-01-04-20	EPI_ISL_1040577	B.1.1.519	2021-01-21
Netherlands|GR-UMCG-MMB_174|EPI_ISL_2230573|B.1.1.519|2021-01-21	Netherlands	GR-UMCG-MMB_174	EPI_ISL_2230573	B.1.1.519	2021-01-21
Mexico|CMX-INER-IBT-0856|EPI_ISL_4888528|B.1.1.519|2021-01-21	Mexico	CMX-INER-IBT-0856	EPI_ISL_4888528	B.1.1.519	2021-01-21
USA|OR-OHSU-10100|EPI_ISL_1541394|B.1.1.519|2021-01-21	USA	OR-OHSU-10100	EPI_ISL_1541394	B.1.1.519	2021-01-21
Mexico|MOR-InDRE_530|EPI_ISL_1168600|B.1.1.519|2021-01-21	Mexico	MOR-InDRE_530	EPI_ISL_1168600	B.1.1.519	2021-01-21
Mexico|MOR-InDRE_533|EPI_ISL_1168603|B.1.1.519|2021-01-21	Mexico	MOR-InDRE_533	EPI_ISL_1168603	B.1.1.519	2021-01-21
USA|UT-UPHL-2105994241|EPI_ISL_2291422|B.1.1.519|2021-01-22	USA	UT-UPHL-2105994241	EPI_ISL_2291422	B.1.1.519	2021-01-22
Brazil|SP-IB_103245|EPI_ISL_2346062|B.1.1.519|2021-01-22	Brazil	SP-IB_103245	EPI_ISL_2346062	B.1.1.519	2021-01-22
Mexico|CMX-INMEGEN-02-01-18|EPI_ISL_1040620|B.1.1.519|2021-01-22	Mexico	CMX-INMEGEN-02-01-18	EPI_ISL_1040620	B.1.1.519	2021-01-22
USA|TX-HMH-MCoV-25544|EPI_ISL_1080913|B.1.1.519|2021-01-22	USA	TX-HMH-MCoV-25544	EPI_ISL_1080913	B.1.1.519	2021-01-22
USA|TX-HMH-MCoV-25472|EPI_ISL_1080876|B.1.1.519|2021-01-22	USA	TX-HMH-MCoV-25472	EPI_ISL_1080876	B.1.1.519	2021-01-22
USA|TX-HMH-MCoV-25529|EPI_ISL_1080898|B.1.1.519|2021-01-22	USA	TX-HMH-MCoV-25529	EPI_ISL_1080898	B.1.1.519	2021-01-22
USA|TX-HMH-MCoV-25456|EPI_ISL_1080860|B.1.1.519|2021-01-22	USA	TX-HMH-MCoV-25456	EPI_ISL_1080860	B.1.1.519	2021-01-22
Mexico|QUE-InDRE_563|EPI_ISL_1168633|B.1.1.519|2021-01-22	Mexico	QUE-InDRE_563	EPI_ISL_1168633	B.1.1.519	2021-01-22
Mexico|CMX-INMEGEN-02-02-19|EPI_ISL_1040553|B.1.1.519|2021-01-22	Mexico	CMX-INMEGEN-02-02-19	EPI_ISL_1040553	B.1.1.519	2021-01-22
USA|TX-HMH-MCoV-29865|EPI_ISL_1304420|B.1.1.519|2021-01-22	USA	TX-HMH-MCoV-29865	EPI_ISL_1304420	B.1.1.519	2021-01-22
USA|CA-UCSF-JD312|EPI_ISL_1094028|B.1.1.519|2021-01-22	USA	CA-UCSF-JD312	EPI_ISL_1094028	B.1.1.519	2021-01-22
Mexico|YUC-NYGC-5885-21|EPI_ISL_3023966|B.1.1.519|2021-01-22	Mexico	YUC-NYGC-5885-21	EPI_ISL_3023966	B.1.1.519	2021-01-22
Mexico|CMX-INMEGEN-02-02-12|EPI_ISL_1040552|B.1.1.519|2021-01-22	Mexico	CMX-INMEGEN-02-02-12	EPI_ISL_1040552	B.1.1.519	2021-01-22
USA|UT-UPHL-210408744102|EPI_ISL_2678082|B.1.1.519|2021-01-23	USA	UT-UPHL-210408744102	EPI_ISL_2678082	B.1.1.519	2021-01-23
Mexico|HID-InDRE_521|EPI_ISL_1168591|B.1.1.519|2021-01-23	Mexico	HID-InDRE_521	EPI_ISL_1168591	B.1.1.519	2021-01-23
USA|NY-Wadsworth-21017477-01|EPI_ISL_1394653|B.1.1.519|2021-01-23	USA	NY-Wadsworth-21017477-01	EPI_ISL_1394653	B.1.1.519	2021-01-23
USA|AZ-CDC-QDX21457101|EPI_ISL_1087265|B.1.1.519|2021-01-23	USA	AZ-CDC-QDX21457101	EPI_ISL_1087265	B.1.1.519	2021-01-23
USA|TX-HMH-MCoV-29725|EPI_ISL_1304281|B.1.1.519|2021-01-23	USA	TX-HMH-MCoV-29725	EPI_ISL_1304281	B.1.1.519	2021-01-23
USA|CA-Stanford-09_S15|EPI_ISL_1424107|B.1.1.519|2021-01-23	USA	CA-Stanford-09_S15	EPI_ISL_1424107	B.1.1.519	2021-01-23
USA|CA-UCSF-JD392|EPI_ISL_1093782|B.1.1.519|2021-01-24	USA	CA-UCSF-JD392	EPI_ISL_1093782	B.1.1.519	2021-01-24
Spain|CT-IBV-98014686|EPI_ISL_1194072|B.1.1.519|2021-01-24	Spain	CT-IBV-98014686	EPI_ISL_1194072	B.1.1.519	2021-01-24
USA|CA-TCPHL-020221-01|EPI_ISL_2324440|B.1.1.519|2021-01-24	USA	CA-TCPHL-020221-01	EPI_ISL_2324440	B.1.1.519	2021-01-24
USA|UT-UPHL-2105826690|EPI_ISL_2291097|B.1.1.519|2021-01-24	USA	UT-UPHL-2105826690	EPI_ISL_2291097	B.1.1.519	2021-01-24
Mexico|YUC-NYGC-6234-21|EPI_ISL_3023882|B.1.1.519|2021-01-24	Mexico	YUC-NYGC-6234-21	EPI_ISL_3023882	B.1.1.519	2021-01-24
USA|CA-TCPHL-032921-04|EPI_ISL_2341177|B.1.1.519|2021-01-24	USA	CA-TCPHL-032921-04	EPI_ISL_2341177	B.1.1.519	2021-01-24
USA|TX-DSHS-2449|EPI_ISL_978311|B.1.1.519|2021-01-24	USA	TX-DSHS-2449	EPI_ISL_978311	B.1.1.519	2021-01-24
USA|CA-ACPHD-00186|EPI_ISL_1373148|B.1.1.519|2021-01-24	USA	CA-ACPHD-00186	EPI_ISL_1373148	B.1.1.519	2021-01-24
USA|CA-CZB-28562|EPI_ISL_1529253|B.1.1.519|2021-01-25	USA	CA-CZB-28562	EPI_ISL_1529253	B.1.1.519	2021-01-25
USA|UT-UPHL-2104767286|EPI_ISL_2081783|B.1.1.519|2021-01-25	USA	UT-UPHL-2104767286	EPI_ISL_2081783	B.1.1.519	2021-01-25
USA|LA-CDC-QDX21489902|EPI_ISL_1086807|B.1.1.519|2021-01-25	USA	LA-CDC-QDX21489902	EPI_ISL_1086807	B.1.1.519	2021-01-25
USA|LA-CDC-QDX21489716|EPI_ISL_1087028|B.1.1.519|2021-01-25	USA	LA-CDC-QDX21489716	EPI_ISL_1087028	B.1.1.519	2021-01-25
USA|LA-CDC-QDX21489637|EPI_ISL_1086698|B.1.1.519|2021-01-25	USA	LA-CDC-QDX21489637	EPI_ISL_1086698	B.1.1.519	2021-01-25
Mexico|YUC-NYGC-6761-21|EPI_ISL_3023803|B.1.1.519|2021-01-25	Mexico	YUC-NYGC-6761-21	EPI_ISL_3023803	B.1.1.519	2021-01-25
Mexico|QUE-InDRE_386|EPI_ISL_1168464|B.1.1.519|2021-01-25	Mexico	QUE-InDRE_386	EPI_ISL_1168464	B.1.1.519	2021-01-25
Mexico|QUE-InDRE_381|EPI_ISL_1168459|B.1.1.519|2021-01-25	Mexico	QUE-InDRE_381	EPI_ISL_1168459	B.1.1.519	2021-01-25
USA|LA-CDC-QDX21489686|EPI_ISL_1086743|B.1.1.519|2021-01-25	USA	LA-CDC-QDX21489686	EPI_ISL_1086743	B.1.1.519	2021-01-25
USA|NY-CDC-QDX21492274|EPI_ISL_1087118|B.1.1.519|2021-01-25	USA	NY-CDC-QDX21492274	EPI_ISL_1087118	B.1.1.519	2021-01-25
USA|NY-MSHSPSP-PV26974|EPI_ISL_1708911|B.1.1.519|2021-01-25	USA	NY-MSHSPSP-PV26974	EPI_ISL_1708911	B.1.1.519	2021-01-25
USA|IL-CDC-QDX21434493|EPI_ISL_1087209|B.1.1.519|2021-01-25	USA	IL-CDC-QDX21434493	EPI_ISL_1087209	B.1.1.519	2021-01-25
Mexico|YUC-NYGC-6630-21|EPI_ISL_3024038|B.1.1.519|2021-01-25	Mexico	YUC-NYGC-6630-21	EPI_ISL_3024038	B.1.1.519	2021-01-25
USA|TX-HMH-MCoV-29600|EPI_ISL_1304156|B.1.1.519|2021-01-25	USA	TX-HMH-MCoV-29600	EPI_ISL_1304156	B.1.1.519	2021-01-25
Mexico|MOR-InDRE_448|EPI_ISL_1168526|B.1.1.519|2021-01-25	Mexico	MOR-InDRE_448	EPI_ISL_1168526	B.1.1.519	2021-01-25
USA|CA-CDPH-2000033064|EPI_ISL_2796935|B.1.1.519|2021-01-26	USA	CA-CDPH-2000033064	EPI_ISL_2796935	B.1.1.519	2021-01-26
USA|CA-CDPH-2000033045|EPI_ISL_2782933|B.1.1.519|2021-01-26	USA	CA-CDPH-2000033045	EPI_ISL_2782933	B.1.1.519	2021-01-26
USA|CA-CDPH-2000032192|EPI_ISL_2825185|B.1.1.519|2021-01-26	USA	CA-CDPH-2000032192	EPI_ISL_2825185	B.1.1.519	2021-01-26
USA|CA-MCPHL-MC01964|EPI_ISL_1664613|B.1.1.519|2021-01-26	USA	CA-MCPHL-MC01964	EPI_ISL_1664613	B.1.1.519	2021-01-26
USA|MI-MDHHS-SC23350|EPI_ISL_1008833|B.1.1.519|2021-01-26	USA	MI-MDHHS-SC23350	EPI_ISL_1008833	B.1.1.519	2021-01-26
Mexico|CMX-INMEGEN-02-02-06|EPI_ISL_1040541|B.1.1.519|2021-01-26	Mexico	CMX-INMEGEN-02-02-06	EPI_ISL_1040541	B.1.1.519	2021-01-26
USA|TX-HHD-2102124057|EPI_ISL_1059273|B.1.1.519|2021-01-26	USA	TX-HHD-2102124057	EPI_ISL_1059273	B.1.1.519	2021-01-26
USA|AL-HGSC-JHJK|EPI_ISL_979478|B.1.1.519|2021-01-26	USA	AL-HGSC-JHJK	EPI_ISL_979478	B.1.1.519	2021-01-26
USA|TX-HMH-MCoV-29277|EPI_ISL_1303835|B.1.1.519|2021-01-26	USA	TX-HMH-MCoV-29277	EPI_ISL_1303835	B.1.1.519	2021-01-26
Spain|AN-IBV-98018764|EPI_ISL_1938822|B.1.1.519|2021-01-26	Spain	AN-IBV-98018764	EPI_ISL_1938822	B.1.1.519	2021-01-26
Mexico|CMX-INMEGEN-02-02-23|EPI_ISL_1040543|B.1.1.519|2021-01-26	Mexico	CMX-INMEGEN-02-02-23	EPI_ISL_1040543	B.1.1.519	2021-01-26
USA|CA-CDPH-2000033189|EPI_ISL_2782964|B.1.1.519|2021-01-27	USA	CA-CDPH-2000033189	EPI_ISL_2782964	B.1.1.519	2021-01-27
Mexico|CMX-INMEGEN-02-01-14|EPI_ISL_1040606|B.1.1.519|2021-01-27	Mexico	CMX-INMEGEN-02-01-14	EPI_ISL_1040606	B.1.1.519	2021-01-27
Mexico|CMX-INER-IBT-0860|EPI_ISL_4888532|B.1.1.519|2021-01-27	Mexico	CMX-INER-IBT-0860	EPI_ISL_4888532	B.1.1.519	2021-01-27
USA|NY-CDC-QDX21488791|EPI_ISL_1087206|B.1.1.519|2021-01-27	USA	NY-CDC-QDX21488791	EPI_ISL_1087206	B.1.1.519	2021-01-27
USA|CA-10070001350121|EPI_ISL_3419499|B.1.1.519|2021-01-27	USA	CA-10070001350121	EPI_ISL_3419499	B.1.1.519	2021-01-27
Mexico|CMX-INMEGEN-02-02-07|EPI_ISL_1040540|B.1.1.519|2021-01-27	Mexico	CMX-INMEGEN-02-02-07	EPI_ISL_1040540	B.1.1.519	2021-01-27
USA|MI-MDHHS-SC23599|EPI_ISL_1058894|B.1.1.519|2021-01-27	USA	MI-MDHHS-SC23599	EPI_ISL_1058894	B.1.1.519	2021-01-27
Mexico|YUC-NYGC-7102-21|EPI_ISL_3023871|B.1.1.519|2021-01-27	Mexico	YUC-NYGC-7102-21	EPI_ISL_3023871	B.1.1.519	2021-01-27
USA|CA-CDPH-2000033127|EPI_ISL_2797779|B.1.1.519|2021-01-27	USA	CA-CDPH-2000033127	EPI_ISL_2797779	B.1.1.519	2021-01-27
USA|CA-SEARCH-14084|EPI_ISL_1815608|B.1.1.519|2021-01-28	USA	CA-SEARCH-14084	EPI_ISL_1815608	B.1.1.519	2021-01-28
Mexico|SEARCH-100596|EPI_ISL_2231494|B.1.1.519|2021-01-28	Mexico	SEARCH-100596	EPI_ISL_2231494	B.1.1.519	2021-01-28
Mexico|CMX-InDRE_249|EPI_ISL_1060716|B.1.1.519|2021-01-28	Mexico	CMX-InDRE_249	EPI_ISL_1060716	B.1.1.519	2021-01-28
USA|NC-CDC-2-3858765|EPI_ISL_1095046|B.1.1.519|2021-01-28	USA	NC-CDC-2-3858765	EPI_ISL_1095046	B.1.1.519	2021-01-28
USA|CA-CDC-QDX21497049|EPI_ISL_1086679|B.1.1.519|2021-01-28	USA	CA-CDC-QDX21497049	EPI_ISL_1086679	B.1.1.519	2021-01-28
USA|CA-CDC-QDX21496361|EPI_ISL_1086694|B.1.1.519|2021-01-28	USA	CA-CDC-QDX21496361	EPI_ISL_1086694	B.1.1.519	2021-01-28
USA|CA-ALSR-6973|EPI_ISL_1081736|B.1.1.519|2021-01-28	USA	CA-ALSR-6973	EPI_ISL_1081736	B.1.1.519	2021-01-28
USA|CA-RD-RA02210|EPI_ISL_1010346|B.1.1.222|2021-01-28	USA	CA-RD-RA02210	EPI_ISL_1010346	B.1.1.222	2021-01-28
USA|CA-RD-RA02254|EPI_ISL_1010384|B.1.1.222|2021-01-28	USA	CA-RD-RA02254	EPI_ISL_1010384	B.1.1.222	2021-01-28
USA|CA-SEARCH-103939|EPI_ISL_3215866|B.1.1.519|2021-01-28	USA	CA-SEARCH-103939	EPI_ISL_3215866	B.1.1.519	2021-01-28
Brazil|SP-HIAE-ID052|EPI_ISL_977500|B.1.1.519|2021-01-28	Brazil	SP-HIAE-ID052	EPI_ISL_977500	B.1.1.519	2021-01-28
USA|MI-MDHHS-SC23587|EPI_ISL_1058882|B.1.1.519|2021-01-28	USA	MI-MDHHS-SC23587	EPI_ISL_1058882	B.1.1.519	2021-01-28
Mexico|CMX-INMEGEN-02-02-21|EPI_ISL_1040539|B.1.1.519|2021-01-28	Mexico	CMX-INMEGEN-02-02-21	EPI_ISL_1040539	B.1.1.519	2021-01-28
USA|CA-CDPH-2000034042|EPI_ISL_2825235|B.1.1.519|2021-01-28	USA	CA-CDPH-2000034042	EPI_ISL_2825235	B.1.1.519	2021-01-28
USA|OH-21AM-028CO02983|EPI_ISL_2312815|B.1.1.519|2021-01-28	USA	OH-21AM-028CO02983	EPI_ISL_2312815	B.1.1.519	2021-01-28
USA|CA-CDC-QDX21497063|EPI_ISL_1086725|B.1.1.519|2021-01-28	USA	CA-CDC-QDX21497063	EPI_ISL_1086725	B.1.1.519	2021-01-28
Spain|PV-IBV-98022601|EPI_ISL_2465812|B.1.1.519|2021-01-28	Spain	PV-IBV-98022601	EPI_ISL_2465812	B.1.1.519	2021-01-28
USA|NY-Wadsworth-21016703-01|EPI_ISL_1397766|B.1.1.519|2021-01-29	USA	NY-Wadsworth-21016703-01	EPI_ISL_1397766	B.1.1.519	2021-01-29
Mexico|YUC-NYGC-8067-21|EPI_ISL_3023992|B.1.1.519|2021-01-29	Mexico	YUC-NYGC-8067-21	EPI_ISL_3023992	B.1.1.519	2021-01-29
Mexico|CMX-INMEGEN-02-02-16|EPI_ISL_1040538|B.1.1.519|2021-01-29	Mexico	CMX-INMEGEN-02-02-16	EPI_ISL_1040538	B.1.1.519	2021-01-29
Mexico|CMX-INMEGEN-02-03-05|EPI_ISL_1040640|B.1.1.519|2021-01-29	Mexico	CMX-INMEGEN-02-03-05	EPI_ISL_1040640	B.1.1.519	2021-01-29
USA|TX-CDC-STM-000005875|EPI_ISL_966863|B.1.1.519|2021-01-29	USA	TX-CDC-STM-000005875	EPI_ISL_966863	B.1.1.519	2021-01-29
USA|MD-HP02105|EPI_ISL_981181|B.1.1.222|2021-01-29	USA	MD-HP02105	EPI_ISL_981181	B.1.1.222	2021-01-29
Spain|MC-IBV-97030263|EPI_ISL_2860887|B.1.1.519|2021-01-29	Spain	MC-IBV-97030263	EPI_ISL_2860887	B.1.1.519	2021-01-29
USA|TX-S4801|EPI_ISL_1049649|B.1.1.519|2021-01-29	USA	TX-S4801	EPI_ISL_1049649	B.1.1.519	2021-01-29
USA|FL-BPHL-1277|EPI_ISL_1239916|B.1.1.519|2021-01-29	USA	FL-BPHL-1277	EPI_ISL_1239916	B.1.1.519	2021-01-29
Mexico|YUC-NYGC-7842-21|EPI_ISL_3023899|B.1.1.519|2021-01-29	Mexico	YUC-NYGC-7842-21	EPI_ISL_3023899	B.1.1.519	2021-01-29
USA|TX-CDC-LC0011579|EPI_ISL_1038459|B.1.1.519|2021-01-29	USA	TX-CDC-LC0011579	EPI_ISL_1038459	B.1.1.519	2021-01-29
USA|NV-CDC-QDX21490551|EPI_ISL_1087100|B.1.1.519|2021-01-29	USA	NV-CDC-QDX21490551	EPI_ISL_1087100	B.1.1.519	2021-01-29
USA|CA-SEARCH-14392|EPI_ISL_1815168|B.1.1.519|2021-01-30	USA	CA-SEARCH-14392	EPI_ISL_1815168	B.1.1.519	2021-01-30
Mexico|MEX-IBT-IMSS-48313-NC|EPI_ISL_3463388|B.1.1.519|2021-01-30	Mexico	MEX-IBT-IMSS-48313-NC	EPI_ISL_3463388	B.1.1.519	2021-01-30
Mexico|MEX-IBT-IMSS-547|EPI_ISL_1302157|B.1.1.519|2021-01-30	Mexico	MEX-IBT-IMSS-547	EPI_ISL_1302157	B.1.1.519	2021-01-30
Mexico|MEX-IBT-IMSS-545|EPI_ISL_1302195|B.1.1.519|2021-01-30	Mexico	MEX-IBT-IMSS-545	EPI_ISL_1302195	B.1.1.519	2021-01-30
Mexico|MEX-IBT-IMSS-46962-NC|EPI_ISL_3463446|B.1.1.519|2021-01-30	Mexico	MEX-IBT-IMSS-46962-NC	EPI_ISL_3463446	B.1.1.519	2021-01-30
Mexico|VER-IBT-IMSS-527|EPI_ISL_1302238|B.1.1.519|2021-01-30	Mexico	VER-IBT-IMSS-527	EPI_ISL_1302238	B.1.1.519	2021-01-30
USA|TX-CDC-QDX21607610|EPI_ISL_1086623|B.1.1.519|2021-01-31	USA	TX-CDC-QDX21607610	EPI_ISL_1086623	B.1.1.519	2021-01-31
USA|NY-PRL-2021_0624_52L06|EPI_ISL_2716067|B.1.1.519|2021-01-31	USA	NY-PRL-2021_0624_52L06	EPI_ISL_2716067	B.1.1.519	2021-01-31
Mexico|MEX-IBT-IMSS-546|EPI_ISL_1302169|B.1.1.519|2021-01-31	Mexico	MEX-IBT-IMSS-546	EPI_ISL_1302169	B.1.1.519	2021-01-31
USA|NV-CDC-LC0012726|EPI_ISL_1038618|B.1.1.519|2021-01-31	USA	NV-CDC-LC0012726	EPI_ISL_1038618	B.1.1.519	2021-01-31
Mexico|CMX-IBT-IMSS-47488-NC|EPI_ISL_3463499|B.1.1.519|2021-01-31	Mexico	CMX-IBT-IMSS-47488-NC	EPI_ISL_3463499	B.1.1.519	2021-01-31
Mexico|SLP-IBT-IMSS-560|EPI_ISL_1302161|B.1.1.519|2021-01-31	Mexico	SLP-IBT-IMSS-560	EPI_ISL_1302161	B.1.1.519	2021-01-31
Mexico|QUE-IBT-IMSS-517|EPI_ISL_1302401|B.1.1.519|2021-01-31	Mexico	QUE-IBT-IMSS-517	EPI_ISL_1302401	B.1.1.519	2021-01-31
Mexico|SLP-IBT-IMSS-562|EPI_ISL_1302352|B.1.1.519|2021-01-31	Mexico	SLP-IBT-IMSS-562	EPI_ISL_1302352	B.1.1.519	2021-01-31
USA|NV-CDC-QDX21641289|EPI_ISL_1087882|B.1.1.519|2021-01-31	USA	NV-CDC-QDX21641289	EPI_ISL_1087882	B.1.1.519	2021-01-31
Mexico|CMX-IBT-IMSS-538|EPI_ISL_1302178|B.1.1.519|2021-01-31	Mexico	CMX-IBT-IMSS-538	EPI_ISL_1302178	B.1.1.519	2021-01-31
USA|CA-CDC-LC0013652|EPI_ISL_1038689|B.1.1.519|2021-01-31	USA	CA-CDC-LC0013652	EPI_ISL_1038689	B.1.1.519	2021-01-31
USA|TX-HMH-MCoV-26005|EPI_ISL_1235785|B.1.1.519|2021-01-31	USA	TX-HMH-MCoV-26005	EPI_ISL_1235785	B.1.1.519	2021-01-31
USA|WY-WPHL-21010703|EPI_ISL_1017850|B.1.1.519|2021-01-31	USA	WY-WPHL-21010703	EPI_ISL_1017850	B.1.1.519	2021-01-31
Mexico|CMX-IBT-IMSS-536|EPI_ISL_1302223|B.1.1.519|2021-02-01	Mexico	CMX-IBT-IMSS-536	EPI_ISL_1302223	B.1.1.519	2021-02-01
USA|TX-HMH-MCoV-25663|EPI_ISL_1080156|B.1.1.519|2021-02-01	USA	TX-HMH-MCoV-25663	EPI_ISL_1080156	B.1.1.519	2021-02-01
USA|LA-CDC-QDX21760011|EPI_ISL_1090827|B.1.1.519|2021-02-01	USA	LA-CDC-QDX21760011	EPI_ISL_1090827	B.1.1.519	2021-02-01
USA|LA-CDC-QDX21609834|EPI_ISL_1086552|B.1.1.519|2021-02-01	USA	LA-CDC-QDX21609834	EPI_ISL_1086552	B.1.1.519	2021-02-01
USA|VA-CDC-LC0012443|EPI_ISL_1037105|B.1.1.519|2021-02-01	USA	VA-CDC-LC0012443	EPI_ISL_1037105	B.1.1.519	2021-02-01
USA|NY-PRL-2021_0623_52M07|EPI_ISL_2715927|B.1.1.519|2021-02-01	USA	NY-PRL-2021_0623_52M07	EPI_ISL_2715927	B.1.1.519	2021-02-01
USA|HI-CDC-2-3906180|EPI_ISL_3353980|B.1.1.519|2021-02-01	USA	HI-CDC-2-3906180	EPI_ISL_3353980	B.1.1.519	2021-02-01
Mexico|MEX-IBT-IMSS-550|EPI_ISL_1302270|B.1.1.519|2021-02-01	Mexico	MEX-IBT-IMSS-550	EPI_ISL_1302270	B.1.1.519	2021-02-01
USA|WA-UW-59029|EPI_ISL_1526952|B.1.1.519|2021-02-01	USA	WA-UW-59029	EPI_ISL_1526952	B.1.1.519	2021-02-01
USA|CA-CZB-25587|EPI_ISL_1234850|B.1.1.519|2021-02-01	USA	CA-CZB-25587	EPI_ISL_1234850	B.1.1.519	2021-02-01
USA|CA-SEARCH-14359|EPI_ISL_1813563|B.1.1.519|2021-02-01	USA	CA-SEARCH-14359	EPI_ISL_1813563	B.1.1.519	2021-02-01
USA|CA-CDC-QDX21612659|EPI_ISL_1088402|B.1.1.519|2021-02-01	USA	CA-CDC-QDX21612659	EPI_ISL_1088402	B.1.1.519	2021-02-01
Mexico|CMX-INMEGEN-02-06-11|EPI_ISL_1080447|B.1.1.519|2021-02-01	Mexico	CMX-INMEGEN-02-06-11	EPI_ISL_1080447	B.1.1.519	2021-02-01
USA|MO-CDC-QDX21672221|EPI_ISL_1087710|B.1.1.519|2021-02-01	USA	MO-CDC-QDX21672221	EPI_ISL_1087710	B.1.1.519	2021-02-01
Mexico|SLP-IBT-IMSS-582|EPI_ISL_1302367|B.1.1.519|2021-02-01	Mexico	SLP-IBT-IMSS-582	EPI_ISL_1302367	B.1.1.519	2021-02-01
USA|CA-PROV-986|EPI_ISL_2551251|B.1.1.519|2021-02-01	USA	CA-PROV-986	EPI_ISL_2551251	B.1.1.519	2021-02-01
Spain|CT-IrsiCaixaR003MP1G9|EPI_ISL_1012993|B.1.1.519|2021-02-01	Spain	CT-IrsiCaixaR003MP1G9	EPI_ISL_1012993	B.1.1.519	2021-02-01
Mexico|CMX-IBT-IMSS-518|EPI_ISL_1302272|B.1.1.519|2021-02-01	Mexico	CMX-IBT-IMSS-518	EPI_ISL_1302272	B.1.1.519	2021-02-01
Mexico|CMX-INMEGEN-02-05-22|EPI_ISL_1060611|B.1.1.519|2021-02-01	Mexico	CMX-INMEGEN-02-05-22	EPI_ISL_1060611	B.1.1.519	2021-02-01
USA|OR-CDC-LC0013185|EPI_ISL_1036970|B.1.1.519|2021-02-01	USA	OR-CDC-LC0013185	EPI_ISL_1036970	B.1.1.519	2021-02-01
USA|CA-CDPH-2000035994|EPI_ISL_2797267|B.1.1.519|2021-02-02	USA	CA-CDPH-2000035994	EPI_ISL_2797267	B.1.1.519	2021-02-02
USA|LA-BIE-115|EPI_ISL_2047880|B.1.1.519|2021-02-02	USA	LA-BIE-115	EPI_ISL_2047880	B.1.1.519	2021-02-02
Mexico|CMX-IBT-IMSS-48587-NC|EPI_ISL_3463517|B.1.1.519|2021-02-02	Mexico	CMX-IBT-IMSS-48587-NC	EPI_ISL_3463517	B.1.1.519	2021-02-02
USA|NM-CDC-STM-000008948|EPI_ISL_1089011|B.1.1.519|2021-02-02	USA	NM-CDC-STM-000008948	EPI_ISL_1089011	B.1.1.519	2021-02-02
USA|MD-IGS-012103307721A|EPI_ISL_1400813|B.1.1.519|2021-02-02	USA	MD-IGS-012103307721A	EPI_ISL_1400813	B.1.1.519	2021-02-02
USA|ID-CDC-LC0011682|EPI_ISL_1036984|B.1.1.519|2021-02-02	USA	ID-CDC-LC0011682	EPI_ISL_1036984	B.1.1.519	2021-02-02
Mexico|CMX-INMEGEN-02-04-09|EPI_ISL_1055022|B.1.1.519|2021-02-02	Mexico	CMX-INMEGEN-02-04-09	EPI_ISL_1055022	B.1.1.519	2021-02-02
Mexico|YUC-NYGC-8659-21|EPI_ISL_3023900|B.1.1.519|2021-02-02	Mexico	YUC-NYGC-8659-21	EPI_ISL_3023900	B.1.1.519	2021-02-02
Mexico|CMX-InDRE_248|EPI_ISL_1060714|B.1.1.519|2021-02-02	Mexico	CMX-InDRE_248	EPI_ISL_1060714	B.1.1.519	2021-02-02
Mexico|MEX-IBT-IMSS-553|EPI_ISL_1302158|B.1.1.519|2021-02-02	Mexico	MEX-IBT-IMSS-553	EPI_ISL_1302158	B.1.1.519	2021-02-02
USA|CA-CDPH-2000036080|EPI_ISL_2783160|B.1.1.519|2021-02-02	USA	CA-CDPH-2000036080	EPI_ISL_2783160	B.1.1.519	2021-02-02
USA|CA-CDPH-2000036083|EPI_ISL_2797283|B.1.1.519|2021-02-02	USA	CA-CDPH-2000036083	EPI_ISL_2797283	B.1.1.519	2021-02-02
Mexico|CMX-IBT-IMSS-570|EPI_ISL_1302372|B.1.1.519|2021-02-02	Mexico	CMX-IBT-IMSS-570	EPI_ISL_1302372	B.1.1.519	2021-02-02
USA|TX-HMH-MCoV-25698|EPI_ISL_1080191|B.1.1.222|2021-02-02	USA	TX-HMH-MCoV-25698	EPI_ISL_1080191	B.1.1.222	2021-02-02
Mexico|CMX-IBT-IMSS-565|EPI_ISL_1302379|B.1.1.519|2021-02-02	Mexico	CMX-IBT-IMSS-565	EPI_ISL_1302379	B.1.1.519	2021-02-02
USA|IL-CDC-QDX21674466|EPI_ISL_1087477|B.1.1.519|2021-02-02	USA	IL-CDC-QDX21674466	EPI_ISL_1087477	B.1.1.519	2021-02-02
USA|CO-CDPHE-2100506675|EPI_ISL_1234143|B.1.1.519|2021-02-02	USA	CO-CDPHE-2100506675	EPI_ISL_1234143	B.1.1.519	2021-02-02
USA|AZ-ASU19127|EPI_ISL_5629965|B.1.1.519|2021-02-02	USA	AZ-ASU19127	EPI_ISL_5629965	B.1.1.519	2021-02-02
USA|TX-HMH-MCoV-25822|EPI_ISL_1080315|B.1.1.519|2021-02-02	USA	TX-HMH-MCoV-25822	EPI_ISL_1080315	B.1.1.519	2021-02-02
USA|AL-CDC-LC0013068|EPI_ISL_1038407|B.1.1.519|2021-02-02	USA	AL-CDC-LC0013068	EPI_ISL_1038407	B.1.1.519	2021-02-02
USA|WI-WSLH-211054|EPI_ISL_1067853|B.1.1.519|2021-02-02	USA	WI-WSLH-211054	EPI_ISL_1067853	B.1.1.519	2021-02-02
Spain|PV-HUD-65117650|EPI_ISL_1495975|B.1.1.519|2021-02-02	Spain	PV-HUD-65117650	EPI_ISL_1495975	B.1.1.519	2021-02-02
Mexico|CMX-INMEGEN-02-05-14|EPI_ISL_1060604|B.1.1.519|2021-02-03	Mexico	CMX-INMEGEN-02-05-14	EPI_ISL_1060604	B.1.1.519	2021-02-03
Mexico|SEARCH-100586|EPI_ISL_2231486|B.1.1.519|2021-02-03	Mexico	SEARCH-100586	EPI_ISL_2231486	B.1.1.519	2021-02-03
USA|NY-PRL-2021_0205_06H05|EPI_ISL_994934|B.1.1.519|2021-02-03	USA	NY-PRL-2021_0205_06H05	EPI_ISL_994934	B.1.1.519	2021-02-03
USA|NY-PRL-2021_0624_52D19|EPI_ISL_2716042|B.1.1.519|2021-02-03	USA	NY-PRL-2021_0624_52D19	EPI_ISL_2716042	B.1.1.519	2021-02-03
USA|LA-BIE-LSUH000756E2S1|EPI_ISL_2663155|B.1.1.519|2021-02-03	USA	LA-BIE-LSUH000756E2S1	EPI_ISL_2663155	B.1.1.519	2021-02-03
Mexico|SEARCH-100579|EPI_ISL_2231479|B.1.1.519|2021-02-03	Mexico	SEARCH-100579	EPI_ISL_2231479	B.1.1.519	2021-02-03
Mexico|CMX-INMEGEN-02-05-17|EPI_ISL_1060607|B.1.1.519|2021-02-03	Mexico	CMX-INMEGEN-02-05-17	EPI_ISL_1060607	B.1.1.519	2021-02-03
Mexico|CMX-INMEGEN-02-04-01|EPI_ISL_1055017|B.1.1.519|2021-02-03	Mexico	CMX-INMEGEN-02-04-01	EPI_ISL_1055017	B.1.1.519	2021-02-03
USA|PA-VSP3016|EPI_ISL_3023175|B.1.1.519|2021-02-03	USA	PA-VSP3016	EPI_ISL_3023175	B.1.1.519	2021-02-03
USA|NY-PRL-2021_0624_51O20|EPI_ISL_2716150|B.1.1.519|2021-02-03	USA	NY-PRL-2021_0624_51O20	EPI_ISL_2716150	B.1.1.519	2021-02-03
USA|NY-PRL-2021_0623_51E11|EPI_ISL_2715830|B.1.1.519|2021-02-03	USA	NY-PRL-2021_0623_51E11	EPI_ISL_2715830	B.1.1.519	2021-02-03
USA|CA-CZB-25886|EPI_ISL_1477378|B.1.1.519|2021-02-03	USA	CA-CZB-25886	EPI_ISL_1477378	B.1.1.519	2021-02-03
Mexico|CMX-INMEGEN-02-05-23|EPI_ISL_1060610|B.1.1.519|2021-02-03	Mexico	CMX-INMEGEN-02-05-23	EPI_ISL_1060610	B.1.1.519	2021-02-03
Mexico|CMX-INMEGEN-02-05-18|EPI_ISL_1060608|B.1.1.519|2021-02-03	Mexico	CMX-INMEGEN-02-05-18	EPI_ISL_1060608	B.1.1.519	2021-02-03
Mexico|CMX-INMEGEN-02-06-09|EPI_ISL_1080445|B.1.1.519|2021-02-03	Mexico	CMX-INMEGEN-02-06-09	EPI_ISL_1080445	B.1.1.519	2021-02-03
Mexico|CMX-INER-IBT-0861|EPI_ISL_4888533|B.1.1.519|2021-02-03	Mexico	CMX-INER-IBT-0861	EPI_ISL_4888533	B.1.1.519	2021-02-03
Mexico|CMX-IBT-IMSS-524|EPI_ISL_1302221|B.1.1.519|2021-02-03	Mexico	CMX-IBT-IMSS-524	EPI_ISL_1302221	B.1.1.519	2021-02-03
USA|CA-RD551-CV0016|EPI_ISL_1068402|B.1.1.519|2021-02-03	USA	CA-RD551-CV0016	EPI_ISL_1068402	B.1.1.519	2021-02-03
USA|CA-CZB-25905|EPI_ISL_1477386|B.1.1.519|2021-02-03	USA	CA-CZB-25905	EPI_ISL_1477386	B.1.1.519	2021-02-03
USA|CA-CDPH-2000035189|EPI_ISL_2797932|B.1.1.519|2021-02-03	USA	CA-CDPH-2000035189	EPI_ISL_2797932	B.1.1.519	2021-02-03
USA|CA-CZB-25852|EPI_ISL_1477424|B.1.1.519|2021-02-03	USA	CA-CZB-25852	EPI_ISL_1477424	B.1.1.519	2021-02-03
Mexico|CMX-INER-IBT-1006|EPI_ISL_6316030|B.1.1.519|2021-02-03	Mexico	CMX-INER-IBT-1006	EPI_ISL_6316030	B.1.1.519	2021-02-03
Mexico|CMX-INMEGEN-02-06-03|EPI_ISL_1080440|B.1.1.519|2021-02-03	Mexico	CMX-INMEGEN-02-06-03	EPI_ISL_1080440	B.1.1.519	2021-02-03
Mexico|CMX-INMEGEN-02-05-10|EPI_ISL_1060601|B.1.1.519|2021-02-03	Mexico	CMX-INMEGEN-02-05-10	EPI_ISL_1060601	B.1.1.519	2021-02-03
USA|TX-HMH-MCoV-26073|EPI_ISL_1235853|B.1.1.519|2021-02-03	USA	TX-HMH-MCoV-26073	EPI_ISL_1235853	B.1.1.519	2021-02-03
USA|UT-UPHL-2104094065|EPI_ISL_1910646|B.1.1.519|2021-02-04	USA	UT-UPHL-2104094065	EPI_ISL_1910646	B.1.1.519	2021-02-04
Mexico|CMX-INMEGEN-02-03-03|EPI_ISL_1040628|B.1.1.519|2021-02-04	Mexico	CMX-INMEGEN-02-03-03	EPI_ISL_1040628	B.1.1.519	2021-02-04
USA|LA-BIE-LSUH000750E2S1|EPI_ISL_2663151|B.1.1.519|2021-02-04	USA	LA-BIE-LSUH000750E2S1	EPI_ISL_2663151	B.1.1.519	2021-02-04
USA|LA-BIE-114|EPI_ISL_2047879|B.1.1.519|2021-02-04	USA	LA-BIE-114	EPI_ISL_2047879	B.1.1.519	2021-02-04
USA|WA-UW-62735|EPI_ISL_1366164|B.1.1.519|2021-02-04	USA	WA-UW-62735	EPI_ISL_1366164	B.1.1.519	2021-02-04
Mexico|CMX-INER-IBT-1008|EPI_ISL_6316032|B.1.1.519|2021-02-04	Mexico	CMX-INER-IBT-1008	EPI_ISL_6316032	B.1.1.519	2021-02-04
Mexico|CMX-INMEGEN-02-04-21|EPI_ISL_1055015|B.1.1.519|2021-02-04	Mexico	CMX-INMEGEN-02-04-21	EPI_ISL_1055015	B.1.1.519	2021-02-04
USA|GA-CDC-STM-000009227|EPI_ISL_1089029|B.1.1.519|2021-02-04	USA	GA-CDC-STM-000009227	EPI_ISL_1089029	B.1.1.519	2021-02-04
USA|CA-RD-RA03750|EPI_ISL_1026900|B.1.1.519|2021-02-04	USA	CA-RD-RA03750	EPI_ISL_1026900	B.1.1.519	2021-02-04
USA|NY-Wadsworth-21021085-01|EPI_ISL_1226862|B.1.1.519|2021-02-04	USA	NY-Wadsworth-21021085-01	EPI_ISL_1226862	B.1.1.519	2021-02-04
USA|WA-UW-60982|EPI_ISL_1110111|B.1.1.519|2021-02-04	USA	WA-UW-60982	EPI_ISL_1110111	B.1.1.519	2021-02-04
Mexico|CMX-INER-IBT-1007|EPI_ISL_6316031|B.1.1.519|2021-02-04	Mexico	CMX-INER-IBT-1007	EPI_ISL_6316031	B.1.1.519	2021-02-04
USA|TX-CDC-STM-000009260|EPI_ISL_1089039|B.1.1.519|2021-02-04	USA	TX-CDC-STM-000009260	EPI_ISL_1089039	B.1.1.519	2021-02-04
Mexico|NLE-UANL-038|EPI_ISL_3701552|B.1.1.519|2021-02-04	Mexico	NLE-UANL-038	EPI_ISL_3701552	B.1.1.519	2021-02-04
USA|MI-UM-10038169026|EPI_ISL_1059185|B.1.1.519|2021-02-04	USA	MI-UM-10038169026	EPI_ISL_1059185	B.1.1.519	2021-02-04
Mexico|CMX-INMEGEN-02-06-15|EPI_ISL_1080449|B.1.1.519|2021-02-04	Mexico	CMX-INMEGEN-02-06-15	EPI_ISL_1080449	B.1.1.519	2021-02-04
Spain|NC-CHN-01001063|EPI_ISL_1622520|B.1.1.519|2021-02-04	Spain	NC-CHN-01001063	EPI_ISL_1622520	B.1.1.519	2021-02-04
USA|OR-OHSU-10382|EPI_ISL_1541617|B.1.1.519|2021-02-04	USA	OR-OHSU-10382	EPI_ISL_1541617	B.1.1.519	2021-02-04
Mexico|CMX-INMEGEN-02-04-03|EPI_ISL_1055010|B.1.1.519|2021-02-04	Mexico	CMX-INMEGEN-02-04-03	EPI_ISL_1055010	B.1.1.519	2021-02-04
Mexico|CMX-INMEGEN-02-06-12|EPI_ISL_1080433|B.1.1.519|2021-02-04	Mexico	CMX-INMEGEN-02-06-12	EPI_ISL_1080433	B.1.1.519	2021-02-04
Mexico|CMX-INMEGEN-02-04-04|EPI_ISL_1055011|B.1.1.519|2021-02-04	Mexico	CMX-INMEGEN-02-04-04	EPI_ISL_1055011	B.1.1.519	2021-02-04
Mexico|CMX-INMEGEN-02-06-14|EPI_ISL_1080448|B.1.1.519|2021-02-04	Mexico	CMX-INMEGEN-02-06-14	EPI_ISL_1080448	B.1.1.519	2021-02-04
USA|LA-BIE-LSUH000753|EPI_ISL_2690144|B.1.1.519|2021-02-05	USA	LA-BIE-LSUH000753	EPI_ISL_2690144	B.1.1.519	2021-02-05
Mexico|CMX-INER-IBT-0863|EPI_ISL_4888535|B.1.1.519|2021-02-05	Mexico	CMX-INER-IBT-0863	EPI_ISL_4888535	B.1.1.519	2021-02-05
USA|NY-Wadsworth-21023367-01|EPI_ISL_1397978|B.1.1.519|2021-02-05	USA	NY-Wadsworth-21023367-01	EPI_ISL_1397978	B.1.1.519	2021-02-05
USA|CA-RD553-CV0045|EPI_ISL_1068555|B.1.1.519|2021-02-05	USA	CA-RD553-CV0045	EPI_ISL_1068555	B.1.1.519	2021-02-05
USA|AZ-CDC-QDX21801976|EPI_ISL_1091023|B.1.1.519|2021-02-05	USA	AZ-CDC-QDX21801976	EPI_ISL_1091023	B.1.1.519	2021-02-05
USA|CO-CDPHE-2100359654|EPI_ISL_1097537|B.1.1.519|2021-02-05	USA	CO-CDPHE-2100359654	EPI_ISL_1097537	B.1.1.519	2021-02-05
Mexico|CMX-INMEGEN-02-06-18|EPI_ISL_1080451|B.1.1.519|2021-02-05	Mexico	CMX-INMEGEN-02-06-18	EPI_ISL_1080451	B.1.1.519	2021-02-05
Mexico|CMX-INMEGEN-02-06-19|EPI_ISL_1080452|B.1.1.519|2021-02-05	Mexico	CMX-INMEGEN-02-06-19	EPI_ISL_1080452	B.1.1.519	2021-02-05
Mexico|CMX-INMEGEN-02-11-15|EPI_ISL_1117367|B.1.1.519|2021-02-05	Mexico	CMX-INMEGEN-02-11-15	EPI_ISL_1117367	B.1.1.519	2021-02-05
USA|UT-UPHL-2105724773|EPI_ISL_2290827|B.1.1.222|2021-02-05	USA	UT-UPHL-2105724773	EPI_ISL_2290827	B.1.1.222	2021-02-05
Mexico|CMX-INMEGEN-02-03-11|EPI_ISL_1040625|B.1.1.519|2021-02-05	Mexico	CMX-INMEGEN-02-03-11	EPI_ISL_1040625	B.1.1.519	2021-02-05
Mexico|CMX-INMEGEN-02-10-10|EPI_ISL_1137469|B.1.1.519|2021-02-05	Mexico	CMX-INMEGEN-02-10-10	EPI_ISL_1137469	B.1.1.519	2021-02-05
Mexico|CMX-INMEGEN-05-01-182|EPI_ISL_2230837|B.1.1.519|2021-02-05	Mexico	CMX-INMEGEN-05-01-182	EPI_ISL_2230837	B.1.1.519	2021-02-05
Mexico|CMX-INMEGEN-02-09-23|EPI_ISL_1095515|B.1.1.519|2021-02-05	Mexico	CMX-INMEGEN-02-09-23	EPI_ISL_1095515	B.1.1.519	2021-02-05
USA|NY-PRL-2021_0624_52G01|EPI_ISL_2716008|B.1.1.519|2021-02-06	USA	NY-PRL-2021_0624_52G01	EPI_ISL_2716008	B.1.1.519	2021-02-06
Mexico|CMX-INMEGEN-02-11-18|EPI_ISL_1117370|B.1.1.519|2021-02-06	Mexico	CMX-INMEGEN-02-11-18	EPI_ISL_1117370	B.1.1.519	2021-02-06
USA|PA-MGEL-01613|EPI_ISL_1137177|B.1.1.519|2021-02-06	USA	PA-MGEL-01613	EPI_ISL_1137177	B.1.1.519	2021-02-06
Mexico|CMX-INMEGEN-02-11-17|EPI_ISL_1117369|B.1.1.519|2021-02-06	Mexico	CMX-INMEGEN-02-11-17	EPI_ISL_1117369	B.1.1.519	2021-02-06
Mexico|YUC-NYGC-9227-21|EPI_ISL_3023890|B.1.1.519|2021-02-06	Mexico	YUC-NYGC-9227-21	EPI_ISL_3023890	B.1.1.519	2021-02-06
USA|IN-CDC-STM-000010442|EPI_ISL_1089122|B.1.1.519|2021-02-06	USA	IN-CDC-STM-000010442	EPI_ISL_1089122	B.1.1.519	2021-02-06
USA|CA-CDPH-3000008703|EPI_ISL_2882076|B.1.1.519|2021-02-06	USA	CA-CDPH-3000008703	EPI_ISL_2882076	B.1.1.519	2021-02-06
Mexico|CMX-INMEGEN-02-09-03|EPI_ISL_1095509|B.1.1.519|2021-02-06	Mexico	CMX-INMEGEN-02-09-03	EPI_ISL_1095509	B.1.1.519	2021-02-06
USA|IL-CDC-QDX21753322|EPI_ISL_1088262|B.1.1.519|2021-02-06	USA	IL-CDC-QDX21753322	EPI_ISL_1088262	B.1.1.519	2021-02-06
USA|IL-CDC-QDX21753652|EPI_ISL_1088089|B.1.1.519|2021-02-06	USA	IL-CDC-QDX21753652	EPI_ISL_1088089	B.1.1.519	2021-02-06
USA|CA-CDPH-3000007608|EPI_ISL_2882629|B.1.1.519|2021-02-06	USA	CA-CDPH-3000007608	EPI_ISL_2882629	B.1.1.519	2021-02-06
Mexico|CMX-INER-IBT-1020|EPI_ISL_6316044|B.1.1.519|2021-02-06	Mexico	CMX-INER-IBT-1020	EPI_ISL_6316044	B.1.1.519	2021-02-06
USA|TX-CDC-STM-000010457|EPI_ISL_1089120|B.1.1.519|2021-02-06	USA	TX-CDC-STM-000010457	EPI_ISL_1089120	B.1.1.519	2021-02-06
Spain|PV-HUC-95045756|EPI_ISL_1575035|B.1.1.519|2021-02-06	Spain	PV-HUC-95045756	EPI_ISL_1575035	B.1.1.519	2021-02-06
USA|CA-CDPH-3000009361|EPI_ISL_2882235|B.1.1.519|2021-02-07	USA	CA-CDPH-3000009361	EPI_ISL_2882235	B.1.1.519	2021-02-07
USA|FL-BPHL-0964|EPI_ISL_1218766|B.1.1.519|2021-02-07	USA	FL-BPHL-0964	EPI_ISL_1218766	B.1.1.519	2021-02-07
USA|AK-PHL6892|EPI_ISL_1061283|B.1.1.519|2021-02-07	USA	AK-PHL6892	EPI_ISL_1061283	B.1.1.519	2021-02-07
USA|WA-UW-61882|EPI_ISL_1181115|B.1.1.519|2021-02-07	USA	WA-UW-61882	EPI_ISL_1181115	B.1.1.519	2021-02-07
Mexico|CMX-INMEGEN-02-09-02|EPI_ISL_1095508|B.1.1.519|2021-02-07	Mexico	CMX-INMEGEN-02-09-02	EPI_ISL_1095508	B.1.1.519	2021-02-07
USA|CA-CDPH-3000007490|EPI_ISL_2882609|B.1.1.519|2021-02-07	USA	CA-CDPH-3000007490	EPI_ISL_2882609	B.1.1.519	2021-02-07
USA|CA-RD584-CV0072|EPI_ISL_1069108|B.1.1.519|2021-02-07	USA	CA-RD584-CV0072	EPI_ISL_1069108	B.1.1.519	2021-02-07
Mexico|CMX-INMEGEN-02-10-07|EPI_ISL_1137466|B.1.1.519|2021-02-07	Mexico	CMX-INMEGEN-02-10-07	EPI_ISL_1137466	B.1.1.519	2021-02-07
USA|TX-HMH-MCoV-28431|EPI_ISL_1238214|B.1.1.519|2021-02-07	USA	TX-HMH-MCoV-28431	EPI_ISL_1238214	B.1.1.519	2021-02-07
Mexico|CMX-INER-IBT-0865|EPI_ISL_4888537|B.1.1.519|2021-02-07	Mexico	CMX-INER-IBT-0865	EPI_ISL_4888537	B.1.1.519	2021-02-07
USA|CA-CDC-QDX22060787|EPI_ISL_1139935|B.1.1.519|2021-02-08	USA	CA-CDC-QDX22060787	EPI_ISL_1139935	B.1.1.519	2021-02-08
USA|IL-NM-6647|EPI_ISL_1340793|B.1.1.519|2021-02-08	USA	IL-NM-6647	EPI_ISL_1340793	B.1.1.519	2021-02-08
USA|CA-RD583-CV0044|EPI_ISL_1069036|B.1.1.519|2021-02-08	USA	CA-RD583-CV0044	EPI_ISL_1069036	B.1.1.519	2021-02-08
USA|CA-CDPH-3000008705|EPI_ISL_2882077|B.1.1.519|2021-02-08	USA	CA-CDPH-3000008705	EPI_ISL_2882077	B.1.1.519	2021-02-08
USA|LA-CDC-QDX21840787|EPI_ISL_1090560|B.1.1.519|2021-02-08	USA	LA-CDC-QDX21840787	EPI_ISL_1090560	B.1.1.519	2021-02-08
USA|LA-CDC-QDX21873004|EPI_ISL_1090430|B.1.1.519|2021-02-08	USA	LA-CDC-QDX21873004	EPI_ISL_1090430	B.1.1.519	2021-02-08
Mexico|CMX-INMEGEN-02-07-09|EPI_ISL_1081165|B.1.1.519|2021-02-08	Mexico	CMX-INMEGEN-02-07-09	EPI_ISL_1081165	B.1.1.519	2021-02-08
Mexico|CMX-INMEGEN-02-09-14|EPI_ISL_1095502|B.1.1.519|2021-02-08	Mexico	CMX-INMEGEN-02-09-14	EPI_ISL_1095502	B.1.1.519	2021-02-08
Mexico|CMX-INMEGEN-02-11-10|EPI_ISL_1117362|B.1.1.519|2021-02-08	Mexico	CMX-INMEGEN-02-11-10	EPI_ISL_1117362	B.1.1.519	2021-02-08
USA|FL-BPHL-0754|EPI_ISL_1191490|B.1.1.519|2021-02-08	USA	FL-BPHL-0754	EPI_ISL_1191490	B.1.1.519	2021-02-08
USA|NJ-NYGC-S-RM-3914-DCJQ871|EPI_ISL_1912830|B.1.1.519|2021-02-08	USA	NJ-NYGC-S-RM-3914-DCJQ871	EPI_ISL_1912830	B.1.1.519	2021-02-08
USA|NY-PRL-2021_02_12_01G06|EPI_ISL_1041347|B.1.1.519|2021-02-08	USA	NY-PRL-2021_02_12_01G06	EPI_ISL_1041347	B.1.1.519	2021-02-08
USA|MD-MDH-1023|EPI_ISL_1064324|B.1.1.519|2021-02-08	USA	MD-MDH-1023	EPI_ISL_1064324	B.1.1.519	2021-02-08
USA|IL-NM-6645|EPI_ISL_1340791|B.1.1.519|2021-02-08	USA	IL-NM-6645	EPI_ISL_1340791	B.1.1.519	2021-02-08
USA|CA-SEARCH-16990|EPI_ISL_1813907|B.1.1.519|2021-02-08	USA	CA-SEARCH-16990	EPI_ISL_1813907	B.1.1.519	2021-02-08
USA|TX-CDC-QDX21873952|EPI_ISL_1090316|B.1.1.519|2021-02-08	USA	TX-CDC-QDX21873952	EPI_ISL_1090316	B.1.1.519	2021-02-08
Mexico|CHH-INER-IMSS-00195|EPI_ISL_1279466|B.1.1.519|2021-02-08	Mexico	CHH-INER-IMSS-00195	EPI_ISL_1279466	B.1.1.519	2021-02-08
Mexico|OAX-IBT-IMSS-148|EPI_ISL_1288171|B.1.1.519|2021-02-08	Mexico	OAX-IBT-IMSS-148	EPI_ISL_1288171	B.1.1.519	2021-02-08
Mexico|CMX-INMEGEN-02-11-01|EPI_ISL_1117353|B.1.1.519|2021-02-08	Mexico	CMX-INMEGEN-02-11-01	EPI_ISL_1117353	B.1.1.519	2021-02-08
Mexico|CMX-INMEGEN-02-11-11|EPI_ISL_1117363|B.1.1.519|2021-02-08	Mexico	CMX-INMEGEN-02-11-11	EPI_ISL_1117363	B.1.1.519	2021-02-08
USA|CA-CDPH-3000010629|EPI_ISL_2882601|B.1.1.519|2021-02-08	USA	CA-CDPH-3000010629	EPI_ISL_2882601	B.1.1.519	2021-02-08
USA|TX-CDC-LC0013982|EPI_ISL_1163301|B.1.1.519|2021-02-08	USA	TX-CDC-LC0013982	EPI_ISL_1163301	B.1.1.519	2021-02-08
Mexico|CMX-INMEGEN-02-11-03|EPI_ISL_1117355|B.1.1.519|2021-02-08	Mexico	CMX-INMEGEN-02-11-03	EPI_ISL_1117355	B.1.1.519	2021-02-08
Mexico|PUE-IBT-IMSS-61|EPI_ISL_1288277|B.1.1.519|2021-02-08	Mexico	PUE-IBT-IMSS-61	EPI_ISL_1288277	B.1.1.519	2021-02-08
USA|NM-CDC-2-3935546|EPI_ISL_1226284|B.1.1.519|2021-02-08	USA	NM-CDC-2-3935546	EPI_ISL_1226284	B.1.1.519	2021-02-08
Mexico|DUR-INER-IMSS-00194|EPI_ISL_1279465|B.1.1.519|2021-02-08	Mexico	DUR-INER-IMSS-00194	EPI_ISL_1279465	B.1.1.519	2021-02-08
Mexico|CMX-INMEGEN-02-10-15|EPI_ISL_1137473|B.1.1.519|2021-02-08	Mexico	CMX-INMEGEN-02-10-15	EPI_ISL_1137473	B.1.1.519	2021-02-08
Mexico|BCS-IBT-IMSS-97|EPI_ISL_1288309|B.1.1.519|2021-02-08	Mexico	BCS-IBT-IMSS-97	EPI_ISL_1288309	B.1.1.519	2021-02-08
USA|PA-CDC-QDX21866479|EPI_ISL_1090934|B.1.1.519|2021-02-08	USA	PA-CDC-QDX21866479	EPI_ISL_1090934	B.1.1.519	2021-02-08
Mexico|CMX-INMEGEN-02-09-20|EPI_ISL_1095507|B.1.1.519|2021-02-08	Mexico	CMX-INMEGEN-02-09-20	EPI_ISL_1095507	B.1.1.519	2021-02-08
USA|OR-UOGC3F-000110|EPI_ISL_1508882|B.1.1.519|2021-02-08	USA	OR-UOGC3F-000110	EPI_ISL_1508882	B.1.1.519	2021-02-08
USA|CA-CDPH-3000024397|EPI_ISL_2891506|B.1.1.519|2021-02-08	USA	CA-CDPH-3000024397	EPI_ISL_2891506	B.1.1.519	2021-02-08
Mexico|MOR-IBT-IMSS-388|EPI_ISL_1288215|B.1.1.519|2021-02-08	Mexico	MOR-IBT-IMSS-388	EPI_ISL_1288215	B.1.1.519	2021-02-08
Mexico|MOR-IBT-IMSS-386|EPI_ISL_1288213|B.1.1.519|2021-02-08	Mexico	MOR-IBT-IMSS-386	EPI_ISL_1288213	B.1.1.519	2021-02-08
Mexico|CMX-INMEGEN-02-09-12|EPI_ISL_1095500|B.1.1.519|2021-02-08	Mexico	CMX-INMEGEN-02-09-12	EPI_ISL_1095500	B.1.1.519	2021-02-08
Mexico|CMX-INMEGEN-02-09-19|EPI_ISL_1095506|B.1.1.519|2021-02-08	Mexico	CMX-INMEGEN-02-09-19	EPI_ISL_1095506	B.1.1.519	2021-02-08
USA|GA-EHC-451K|EPI_ISL_2321550|B.1.1.519|2021-02-08	USA	GA-EHC-451K	EPI_ISL_2321550	B.1.1.519	2021-02-08
Mexico|OAX-IBT-IMSS-136|EPI_ISL_1288170|B.1.1.519|2021-02-08	Mexico	OAX-IBT-IMSS-136	EPI_ISL_1288170	B.1.1.519	2021-02-08
USA|CA-CDPH-3000023809|EPI_ISL_2882037|B.1.1.519|2021-02-09	USA	CA-CDPH-3000023809	EPI_ISL_2882037	B.1.1.519	2021-02-09
USA|NY-PRL-2021_02_12_02E05|EPI_ISL_1041436|B.1.1.519|2021-02-09	USA	NY-PRL-2021_02_12_02E05	EPI_ISL_1041436	B.1.1.519	2021-02-09
Mexico|OAX-IBT-IMSS-170|EPI_ISL_1288173|B.1.1.519|2021-02-09	Mexico	OAX-IBT-IMSS-170	EPI_ISL_1288173	B.1.1.519	2021-02-09
USA|CA-CDC-STM-000011214|EPI_ISL_1089260|B.1.1.519|2021-02-09	USA	CA-CDC-STM-000011214	EPI_ISL_1089260	B.1.1.519	2021-02-09
USA|LA-CDC-LC0014963|EPI_ISL_1163362|B.1.1.519|2021-02-09	USA	LA-CDC-LC0014963	EPI_ISL_1163362	B.1.1.519	2021-02-09
USA|LA-CDC-LC0016555|EPI_ISL_1163472|B.1.1.519|2021-02-09	USA	LA-CDC-LC0016555	EPI_ISL_1163472	B.1.1.519	2021-02-09
USA|NJ-CDC-LC0014129|EPI_ISL_1161509|B.1.1.519|2021-02-09	USA	NJ-CDC-LC0014129	EPI_ISL_1161509	B.1.1.519	2021-02-09
USA|NJ-PHEL-P21-6193|EPI_ISL_1060786|B.1.1.519|2021-02-09	USA	NJ-PHEL-P21-6193	EPI_ISL_1060786	B.1.1.519	2021-02-09
USA|CA-CDPH-3000018865|EPI_ISL_2855253|B.1.1.519|2021-02-09	USA	CA-CDPH-3000018865	EPI_ISL_2855253	B.1.1.519	2021-02-09
USA|TX-BSWTemple-ST09163|EPI_ISL_1110292|B.1.1.519|2021-02-09	USA	TX-BSWTemple-ST09163	EPI_ISL_1110292	B.1.1.519	2021-02-09
Netherlands|LI-MUMC-1802|EPI_ISL_2030458|B.1.1.519|2021-02-09	Netherlands	LI-MUMC-1802	EPI_ISL_2030458	B.1.1.519	2021-02-09
Mexico|GRO-IBT-IMSS-408|EPI_ISL_1288230|B.1.1.222|2021-02-09	Mexico	GRO-IBT-IMSS-408	EPI_ISL_1288230	B.1.1.222	2021-02-09
Mexico|GRO-IBT-IMSS-182|EPI_ISL_1288175|B.1.1.222|2021-02-09	Mexico	GRO-IBT-IMSS-182	EPI_ISL_1288175	B.1.1.222	2021-02-09
Mexico|CMX-INER-IBT-0866|EPI_ISL_4888538|B.1.1.519|2021-02-09	Mexico	CMX-INER-IBT-0866	EPI_ISL_4888538	B.1.1.519	2021-02-09
Mexico|GRO-IBT-IMSS-411|EPI_ISL_1288233|B.1.1.519|2021-02-09	Mexico	GRO-IBT-IMSS-411	EPI_ISL_1288233	B.1.1.519	2021-02-09
USA|GA-CDC-LC0015030|EPI_ISL_1161652|B.1.1.519|2021-02-09	USA	GA-CDC-LC0015030	EPI_ISL_1161652	B.1.1.519	2021-02-09
Mexico|MOR-IBT-IMSS-389|EPI_ISL_1288216|B.1.1.519|2021-02-09	Mexico	MOR-IBT-IMSS-389	EPI_ISL_1288216	B.1.1.519	2021-02-09
USA|TX-DSHS-3525|EPI_ISL_1261596|B.1.1.519|2021-02-09	USA	TX-DSHS-3525	EPI_ISL_1261596	B.1.1.519	2021-02-09
Mexico|MOR-IBT-IMSS-414|EPI_ISL_1288160|B.1.1.519|2021-02-09	Mexico	MOR-IBT-IMSS-414	EPI_ISL_1288160	B.1.1.519	2021-02-09
Mexico|CMX-INMEGEN-02-07-08|EPI_ISL_1081163|B.1.1.519|2021-02-09	Mexico	CMX-INMEGEN-02-07-08	EPI_ISL_1081163	B.1.1.519	2021-02-09
Mexico|GRO-IBT-IMSS-415|EPI_ISL_1288236|B.1.1.519|2021-02-09	Mexico	GRO-IBT-IMSS-415	EPI_ISL_1288236	B.1.1.519	2021-02-09
Mexico|GRO-IBT-IMSS-412|EPI_ISL_1288234|B.1.1.519|2021-02-09	Mexico	GRO-IBT-IMSS-412	EPI_ISL_1288234	B.1.1.519	2021-02-09
Mexico|CMX-INER-IBT-0867|EPI_ISL_4888539|B.1.1.519|2021-02-09	Mexico	CMX-INER-IBT-0867	EPI_ISL_4888539	B.1.1.519	2021-02-09
USA|IN-CDC-LC0015706|EPI_ISL_1163114|B.1.1.519|2021-02-09	USA	IN-CDC-LC0015706	EPI_ISL_1163114	B.1.1.519	2021-02-09
Mexico|GRO-IBT-IMSS-394|EPI_ISL_1288220|B.1.1.519|2021-02-09	Mexico	GRO-IBT-IMSS-394	EPI_ISL_1288220	B.1.1.519	2021-02-09
USA|CA-CZB-28734|EPI_ISL_1529187|B.1.1.519|2021-02-09	USA	CA-CZB-28734	EPI_ISL_1529187	B.1.1.519	2021-02-09
USA|IL-NM-6709|EPI_ISL_1340807|B.1.1.519|2021-02-09	USA	IL-NM-6709	EPI_ISL_1340807	B.1.1.519	2021-02-09
USA|FL-CDC-STM-000011869|EPI_ISL_1088723|B.1.1.519|2021-02-09	USA	FL-CDC-STM-000011869	EPI_ISL_1088723	B.1.1.519	2021-02-09
USA|NM-CDC-LC0016313|EPI_ISL_1161715|B.1.1.519|2021-02-09	USA	NM-CDC-LC0016313	EPI_ISL_1161715	B.1.1.519	2021-02-09
Mexico|CMX-INMEGEN-02-11-13|EPI_ISL_1117365|B.1.1.519|2021-02-09	Mexico	CMX-INMEGEN-02-11-13	EPI_ISL_1117365	B.1.1.519	2021-02-09
Mexico|CMX-INMEGEN-02-11-08|EPI_ISL_1117360|B.1.1.519|2021-02-09	Mexico	CMX-INMEGEN-02-11-08	EPI_ISL_1117360	B.1.1.519	2021-02-09
USA|NJ-CDC-LC0016369|EPI_ISL_1163452|B.1.1.519|2021-02-09	USA	NJ-CDC-LC0016369	EPI_ISL_1163452	B.1.1.519	2021-02-09
USA|CA-CZB-28735|EPI_ISL_1529280|B.1.1.519|2021-02-09	USA	CA-CZB-28735	EPI_ISL_1529280	B.1.1.519	2021-02-09
Mexico|CMX-INMEGEN-02-11-23|EPI_ISL_1117375|B.1.1.519|2021-02-09	Mexico	CMX-INMEGEN-02-11-23	EPI_ISL_1117375	B.1.1.519	2021-02-09
Mexico|GRO-IBT-IMSS-417|EPI_ISL_1288238|B.1.1.519|2021-02-09	Mexico	GRO-IBT-IMSS-417	EPI_ISL_1288238	B.1.1.519	2021-02-09
Mexico|CMX-INMEGEN-02-11-07|EPI_ISL_1117359|B.1.1.519|2021-02-09	Mexico	CMX-INMEGEN-02-11-07	EPI_ISL_1117359	B.1.1.519	2021-02-09
Mexico|VER-IBT-IMSS-421|EPI_ISL_1288242|B.1.1.519|2021-02-10	Mexico	VER-IBT-IMSS-421	EPI_ISL_1288242	B.1.1.519	2021-02-10
Mexico|VER-IBT-IMSS-112|EPI_ISL_1288321|B.1.1.519|2021-02-10	Mexico	VER-IBT-IMSS-112	EPI_ISL_1288321	B.1.1.519	2021-02-10
USA|CA-CDPH-3000009255|EPI_ISL_2853725|B.1.1.519|2021-02-10	USA	CA-CDPH-3000009255	EPI_ISL_2853725	B.1.1.519	2021-02-10
Mexico|SLP-IBT-IMSS-74|EPI_ISL_1288289|B.1.1.519|2021-02-10	Mexico	SLP-IBT-IMSS-74	EPI_ISL_1288289	B.1.1.519	2021-02-10
Mexico|SLP-IBT-IMSS-78|EPI_ISL_1288293|B.1.1.519|2021-02-10	Mexico	SLP-IBT-IMSS-78	EPI_ISL_1288293	B.1.1.519	2021-02-10
Mexico|ROO-INER-IMSS-00359|EPI_ISL_1279604|B.1.1.519|2021-02-10	Mexico	ROO-INER-IMSS-00359	EPI_ISL_1279604	B.1.1.519	2021-02-10
Mexico|MEX-IBT-IMSS-177|EPI_ISL_1288376|B.1.1.519|2021-02-10	Mexico	MEX-IBT-IMSS-177	EPI_ISL_1288376	B.1.1.519	2021-02-10
Mexico|CHP-IBT-IMSS-118|EPI_ISL_1288326|B.1.1.519|2021-02-10	Mexico	CHP-IBT-IMSS-118	EPI_ISL_1288326	B.1.1.519	2021-02-10
USA|LA-BIE-LSUH000745|EPI_ISL_2650382|B.1.1.519|2021-02-10	USA	LA-BIE-LSUH000745	EPI_ISL_2650382	B.1.1.519	2021-02-10
USA|MA-CDC-LC0017073|EPI_ISL_1160948|B.1.1.519|2021-02-10	USA	MA-CDC-LC0017073	EPI_ISL_1160948	B.1.1.519	2021-02-10
Mexico|PUE-IBT-IMSS-129|EPI_ISL_1288335|B.1.1.519|2021-02-10	Mexico	PUE-IBT-IMSS-129	EPI_ISL_1288335	B.1.1.519	2021-02-10
Mexico|CMX-INMEGEN-02-11-19|EPI_ISL_1117371|B.1.1.519|2021-02-10	Mexico	CMX-INMEGEN-02-11-19	EPI_ISL_1117371	B.1.1.519	2021-02-10
Mexico|BCN-SEARCH-7360|EPI_ISL_1295671|B.1.1.519|2021-02-10	Mexico	BCN-SEARCH-7360	EPI_ISL_1295671	B.1.1.519	2021-02-10
Mexico|MEX-IBT-IMSS-379|EPI_ISL_1288207|B.1.1.519|2021-02-10	Mexico	MEX-IBT-IMSS-379	EPI_ISL_1288207	B.1.1.519	2021-02-10
USA|CO-CDPHE-2100400374|EPI_ISL_1097616|B.1.1.519|2021-02-10	USA	CO-CDPHE-2100400374	EPI_ISL_1097616	B.1.1.519	2021-02-10
Netherlands|UT-RIVM-13209|EPI_ISL_1035305|B.1.1.519|2021-02-10	Netherlands	UT-RIVM-13209	EPI_ISL_1035305	B.1.1.519	2021-02-10
Mexico|MOR-IBT-IMSS-27|EPI_ISL_1288246|B.1.1.519|2021-02-10	Mexico	MOR-IBT-IMSS-27	EPI_ISL_1288246	B.1.1.519	2021-02-10
Mexico|CMX-INMEGEN-02-07-13|EPI_ISL_1081156|B.1.1.519|2021-02-10	Mexico	CMX-INMEGEN-02-07-13	EPI_ISL_1081156	B.1.1.519	2021-02-10
Mexico|SLP-INER-IMSS-00218|EPI_ISL_1279484|B.1.1.519|2021-02-10	Mexico	SLP-INER-IMSS-00218	EPI_ISL_1279484	B.1.1.519	2021-02-10
Mexico|PUE-IBT-IMSS-140|EPI_ISL_1288343|B.1.1.519|2021-02-10	Mexico	PUE-IBT-IMSS-140	EPI_ISL_1288343	B.1.1.519	2021-02-10
Mexico|PUE-IBT-IMSS-144|EPI_ISL_1288347|B.1.1.519|2021-02-10	Mexico	PUE-IBT-IMSS-144	EPI_ISL_1288347	B.1.1.519	2021-02-10
Mexico|VER-IBT-IMSS-113|EPI_ISL_1288322|B.1.1.519|2021-02-10	Mexico	VER-IBT-IMSS-113	EPI_ISL_1288322	B.1.1.519	2021-02-10
Mexico|GRO-IBT-IMSS-391|EPI_ISL_1288218|B.1.1.519|2021-02-10	Mexico	GRO-IBT-IMSS-391	EPI_ISL_1288218	B.1.1.519	2021-02-10
Mexico|VER-IBT-IMSS-85|EPI_ISL_1288299|B.1.1.519|2021-02-10	Mexico	VER-IBT-IMSS-85	EPI_ISL_1288299	B.1.1.519	2021-02-10
Mexico|MEX-IBT-IMSS-183|EPI_ISL_1288381|B.1.1.519|2021-02-10	Mexico	MEX-IBT-IMSS-183	EPI_ISL_1288381	B.1.1.519	2021-02-10
Mexico|PUE-IBT-IMSS-49|EPI_ISL_1288266|B.1.1.519|2021-02-10	Mexico	PUE-IBT-IMSS-49	EPI_ISL_1288266	B.1.1.519	2021-02-10
Mexico|PUE-IBT-IMSS-60|EPI_ISL_1288276|B.1.1.519|2021-02-10	Mexico	PUE-IBT-IMSS-60	EPI_ISL_1288276	B.1.1.519	2021-02-10
Mexico|BCS-IBT-IMSS-226|EPI_ISL_1288179|B.1.1.222|2021-02-10	Mexico	BCS-IBT-IMSS-226	EPI_ISL_1288179	B.1.1.222	2021-02-10
Mexico|PUE-IBT-IMSS-141|EPI_ISL_1288344|B.1.1.519|2021-02-10	Mexico	PUE-IBT-IMSS-141	EPI_ISL_1288344	B.1.1.519	2021-02-10
USA|MI-UM-10038261756|EPI_ISL_1059116|B.1.1.519|2021-02-10	USA	MI-UM-10038261756	EPI_ISL_1059116	B.1.1.519	2021-02-10
Mexico|MEX-IBT-IMSS-180|EPI_ISL_1288379|B.1.1.519|2021-02-10	Mexico	MEX-IBT-IMSS-180	EPI_ISL_1288379	B.1.1.519	2021-02-10
Mexico|CMX-INMEGEN-02-07-17|EPI_ISL_1081158|B.1.1.519|2021-02-10	Mexico	CMX-INMEGEN-02-07-17	EPI_ISL_1081158	B.1.1.519	2021-02-10
Mexico|PUE-IBT-IMSS-130|EPI_ISL_1288336|B.1.1.519|2021-02-10	Mexico	PUE-IBT-IMSS-130	EPI_ISL_1288336	B.1.1.519	2021-02-10
Mexico|CMX-INMEGEN-02-07-20|EPI_ISL_1081161|B.1.1.519|2021-02-10	Mexico	CMX-INMEGEN-02-07-20	EPI_ISL_1081161	B.1.1.519	2021-02-10
Mexico|CMX-INMEGEN-02-12-07|EPI_ISL_1120884|B.1.1.519|2021-02-10	Mexico	CMX-INMEGEN-02-12-07	EPI_ISL_1120884	B.1.1.519	2021-02-10
USA|CA-CDC-QDX22120960|EPI_ISL_1139396|B.1.1.519|2021-02-10	USA	CA-CDC-QDX22120960	EPI_ISL_1139396	B.1.1.519	2021-02-10
Mexico|MEX-IBT-IMSS-178|EPI_ISL_1288377|B.1.1.519|2021-02-10	Mexico	MEX-IBT-IMSS-178	EPI_ISL_1288377	B.1.1.519	2021-02-10
Mexico|VER-IBT-IMSS-82|EPI_ISL_1288296|B.1.1.519|2021-02-10	Mexico	VER-IBT-IMSS-82	EPI_ISL_1288296	B.1.1.519	2021-02-10
Mexico|PUE-IBT-IMSS-36|EPI_ISL_1288255|B.1.1.519|2021-02-10	Mexico	PUE-IBT-IMSS-36	EPI_ISL_1288255	B.1.1.519	2021-02-10
Mexico|CMX-IBT-IMSS-362|EPI_ISL_1288191|B.1.1.519|2021-02-10	Mexico	CMX-IBT-IMSS-362	EPI_ISL_1288191	B.1.1.519	2021-02-10
USA|TX-CDC-STM-000013092|EPI_ISL_1134490|B.1.1.519|2021-02-10	USA	TX-CDC-STM-000013092	EPI_ISL_1134490	B.1.1.519	2021-02-10
Mexico|GRO-IBT-IMSS-396|EPI_ISL_1288222|B.1.1.519|2021-02-10	Mexico	GRO-IBT-IMSS-396	EPI_ISL_1288222	B.1.1.519	2021-02-10
Mexico|PUE-IBT-IMSS-120|EPI_ISL_1288328|B.1.1.519|2021-02-10	Mexico	PUE-IBT-IMSS-120	EPI_ISL_1288328	B.1.1.519	2021-02-10
Mexico|VER-IBT-IMSS-91|EPI_ISL_1288305|B.1.1.519|2021-02-10	Mexico	VER-IBT-IMSS-91	EPI_ISL_1288305	B.1.1.519	2021-02-10
Mexico|SLP-IBT-IMSS-336|EPI_ISL_1288187|B.1.1.519|2021-02-10	Mexico	SLP-IBT-IMSS-336	EPI_ISL_1288187	B.1.1.519	2021-02-10
USA|CA-CDC-QDX22061030|EPI_ISL_1139840|B.1.1.519|2021-02-10	USA	CA-CDC-QDX22061030	EPI_ISL_1139840	B.1.1.519	2021-02-10
Spain|CT-HUVH-23942|EPI_ISL_1059059|B.1.1.519|2021-02-10	Spain	CT-HUVH-23942	EPI_ISL_1059059	B.1.1.519	2021-02-10
Mexico|VER-IBT-IMSS-105|EPI_ISL_1288315|B.1.1.519|2021-02-10	Mexico	VER-IBT-IMSS-105	EPI_ISL_1288315	B.1.1.519	2021-02-10
Mexico|CMX-INMEGEN-02-07-03|EPI_ISL_1081154|B.1.1.519|2021-02-10	Mexico	CMX-INMEGEN-02-07-03	EPI_ISL_1081154	B.1.1.519	2021-02-10
Spain|CB-IBV-98019457|EPI_ISL_1938857|B.1.1.519|2021-02-10	Spain	CB-IBV-98019457	EPI_ISL_1938857	B.1.1.519	2021-02-10
Mexico|QUE-IBT-IMSS-376|EPI_ISL_1288204|B.1.1.519|2021-02-10	Mexico	QUE-IBT-IMSS-376	EPI_ISL_1288204	B.1.1.519	2021-02-10
USA|FL-CDC-STM-000012383|EPI_ISL_1134071|B.1.1.519|2021-02-10	USA	FL-CDC-STM-000012383	EPI_ISL_1134071	B.1.1.519	2021-02-10
Mexico|CMX-INMEGEN-02-07-18|EPI_ISL_1081159|B.1.1.519|2021-02-10	Mexico	CMX-INMEGEN-02-07-18	EPI_ISL_1081159	B.1.1.519	2021-02-10
Mexico|CMX-INMEGEN-02-11-22|EPI_ISL_1117374|B.1.1.519|2021-02-10	Mexico	CMX-INMEGEN-02-11-22	EPI_ISL_1117374	B.1.1.519	2021-02-10
Mexico|QUE-IBT-IMSS-374|EPI_ISL_1288202|B.1.1.519|2021-02-10	Mexico	QUE-IBT-IMSS-374	EPI_ISL_1288202	B.1.1.519	2021-02-10
Mexico|CMX-INER-IBT-0868|EPI_ISL_4888540|B.1.1.519|2021-02-11	Mexico	CMX-INER-IBT-0868	EPI_ISL_4888540	B.1.1.519	2021-02-11
Mexico|VER-IBT-IMSS-273|EPI_ISL_1288460|B.1.1.519|2021-02-11	Mexico	VER-IBT-IMSS-273	EPI_ISL_1288460	B.1.1.519	2021-02-11
Mexico|BCS-IBT-IMSS-233|EPI_ISL_1288426|B.1.1.519|2021-02-11	Mexico	BCS-IBT-IMSS-233	EPI_ISL_1288426	B.1.1.519	2021-02-11
Mexico|BCS-IBT-IMSS-240|EPI_ISL_1288430|B.1.1.519|2021-02-11	Mexico	BCS-IBT-IMSS-240	EPI_ISL_1288430	B.1.1.519	2021-02-11
USA|IN-CDC-LC0016661|EPI_ISL_1163493|B.1.1.519|2021-02-11	USA	IN-CDC-LC0016661	EPI_ISL_1163493	B.1.1.519	2021-02-11
Mexico|OAX-IBT-IMSS-152|EPI_ISL_1288354|B.1.1.519|2021-02-11	Mexico	OAX-IBT-IMSS-152	EPI_ISL_1288354	B.1.1.519	2021-02-11
USA|LA-BIE-LSUH000740|EPI_ISL_2690141|B.1.1.519|2021-02-11	USA	LA-BIE-LSUH000740	EPI_ISL_2690141	B.1.1.519	2021-02-11
USA|LA-CDC-QDX22055459|EPI_ISL_1139816|B.1.1.519|2021-02-11	USA	LA-CDC-QDX22055459	EPI_ISL_1139816	B.1.1.519	2021-02-11
Mexico|TLA-IBT-IMSS-32|EPI_ISL_1288251|B.1.1.519|2021-02-11	Mexico	TLA-IBT-IMSS-32	EPI_ISL_1288251	B.1.1.519	2021-02-11
Mexico|VER-IBT-IMSS-270|EPI_ISL_1288458|B.1.1.519|2021-02-11	Mexico	VER-IBT-IMSS-270	EPI_ISL_1288458	B.1.1.519	2021-02-11
USA|CA-CDPH-2000037227|EPI_ISL_2934299|B.1.1.519|2021-02-11	USA	CA-CDPH-2000037227	EPI_ISL_2934299	B.1.1.519	2021-02-11
Mexico|QUE-IBT-IMSS-229|EPI_ISL_1288422|B.1.1.519|2021-02-11	Mexico	QUE-IBT-IMSS-229	EPI_ISL_1288422	B.1.1.519	2021-02-11
USA|TX-HHD-4531913|EPI_ISL_1260642|B.1.1.519|2021-02-11	USA	TX-HHD-4531913	EPI_ISL_1260642	B.1.1.519	2021-02-11
USA|MA-CDC-STM-000012949|EPI_ISL_1134391|B.1.1.519|2021-02-11	USA	MA-CDC-STM-000012949	EPI_ISL_1134391	B.1.1.519	2021-02-11
USA|FL-CDC-STM-000013452|EPI_ISL_1134679|B.1.1.519|2021-02-11	USA	FL-CDC-STM-000013452	EPI_ISL_1134679	B.1.1.519	2021-02-11
Mexico|PUE-IBT-IMSS-131|EPI_ISL_1288337|B.1.1.519|2021-02-11	Mexico	PUE-IBT-IMSS-131	EPI_ISL_1288337	B.1.1.519	2021-02-11
Mexico|MEX-IBT-IMSS-211|EPI_ISL_1288407|B.1.1.519|2021-02-11	Mexico	MEX-IBT-IMSS-211	EPI_ISL_1288407	B.1.1.519	2021-02-11
Mexico|CMX-IBT-IMSS-368|EPI_ISL_1288197|B.1.1.519|2021-02-11	Mexico	CMX-IBT-IMSS-368	EPI_ISL_1288197	B.1.1.519	2021-02-11
Mexico|PUE-IBT-IMSS-40|EPI_ISL_1288258|B.1.1.519|2021-02-11	Mexico	PUE-IBT-IMSS-40	EPI_ISL_1288258	B.1.1.519	2021-02-11
Mexico|MOR-IBT-IMSS-176|EPI_ISL_1288375|B.1.1.519|2021-02-11	Mexico	MOR-IBT-IMSS-176	EPI_ISL_1288375	B.1.1.519	2021-02-11
USA|PA-CDC-STM-000012978|EPI_ISL_1134441|B.1.1.519|2021-02-11	USA	PA-CDC-STM-000012978	EPI_ISL_1134441	B.1.1.519	2021-02-11
USA|TX-HMH-MCoV-27985|EPI_ISL_1237767|B.1.1.519|2021-02-11	USA	TX-HMH-MCoV-27985	EPI_ISL_1237767	B.1.1.519	2021-02-11
Mexico|MEX-IBT-IMSS-164|EPI_ISL_1288365|B.1.1.519|2021-02-11	Mexico	MEX-IBT-IMSS-164	EPI_ISL_1288365	B.1.1.519	2021-02-11
Mexico|VER-IBT-IMSS-163|EPI_ISL_1288364|B.1.1.519|2021-02-11	Mexico	VER-IBT-IMSS-163	EPI_ISL_1288364	B.1.1.519	2021-02-11
Mexico|COA-INER-IMSS-00211|EPI_ISL_1279477|B.1.1.519|2021-02-11	Mexico	COA-INER-IMSS-00211	EPI_ISL_1279477	B.1.1.519	2021-02-11
USA|OH-CDC-QDX22028052|EPI_ISL_1159502|B.1.1.519|2021-02-11	USA	OH-CDC-QDX22028052	EPI_ISL_1159502	B.1.1.519	2021-02-11
Mexico|MEX-IBT-IMSS-378|EPI_ISL_1288206|B.1.1.519|2021-02-11	Mexico	MEX-IBT-IMSS-378	EPI_ISL_1288206	B.1.1.519	2021-02-11
Mexico|BCS-IBT-IMSS-236|EPI_ISL_1288428|B.1.1.519|2021-02-11	Mexico	BCS-IBT-IMSS-236	EPI_ISL_1288428	B.1.1.519	2021-02-11
Mexico|BCS-IBT-IMSS-109|EPI_ISL_1288318|B.1.1.519|2021-02-11	Mexico	BCS-IBT-IMSS-109	EPI_ISL_1288318	B.1.1.519	2021-02-11
Mexico|PUE-IBT-IMSS-57|EPI_ISL_1288274|B.1.1.519|2021-02-11	Mexico	PUE-IBT-IMSS-57	EPI_ISL_1288274	B.1.1.519	2021-02-11
Spain|NC-CHN-01003059|EPI_ISL_2510483|B.1.1.519|2021-02-11	Spain	NC-CHN-01003059	EPI_ISL_2510483	B.1.1.519	2021-02-11
Mexico|PUE-IBT-IMSS-42|EPI_ISL_1288260|B.1.1.519|2021-02-11	Mexico	PUE-IBT-IMSS-42	EPI_ISL_1288260	B.1.1.519	2021-02-11
Mexico|VER-IBT-IMSS-269|EPI_ISL_1288457|B.1.1.519|2021-02-11	Mexico	VER-IBT-IMSS-269	EPI_ISL_1288457	B.1.1.519	2021-02-11
USA|GA-CDC-QDX21955591|EPI_ISL_1114095|B.1.1.519|2021-02-11	USA	GA-CDC-QDX21955591	EPI_ISL_1114095	B.1.1.519	2021-02-11
USA|MI-MDHHS-SC24146|EPI_ISL_1158290|B.1.1.519|2021-02-11	USA	MI-MDHHS-SC24146	EPI_ISL_1158290	B.1.1.519	2021-02-11
Mexico|PUE-IBT-IMSS-38|EPI_ISL_1288256|B.1.1.519|2021-02-11	Mexico	PUE-IBT-IMSS-38	EPI_ISL_1288256	B.1.1.519	2021-02-11
Mexico|MEX-IBT-IMSS-377|EPI_ISL_1288205|B.1.1.519|2021-02-11	Mexico	MEX-IBT-IMSS-377	EPI_ISL_1288205	B.1.1.519	2021-02-11
Mexico|ZAC-INER-IMSS-00024|EPI_ISL_1279325|B.1.1.519|2021-02-11	Mexico	ZAC-INER-IMSS-00024	EPI_ISL_1279325	B.1.1.519	2021-02-11
Mexico|MEX-IBT-IMSS-210|EPI_ISL_1288406|B.1.1.519|2021-02-11	Mexico	MEX-IBT-IMSS-210	EPI_ISL_1288406	B.1.1.519	2021-02-11
Mexico|MEX-IBT-IMSS-166|EPI_ISL_1288367|B.1.1.519|2021-02-11	Mexico	MEX-IBT-IMSS-166	EPI_ISL_1288367	B.1.1.519	2021-02-11
Mexico|MEX-IBT-IMSS-167|EPI_ISL_1288368|B.1.1.519|2021-02-11	Mexico	MEX-IBT-IMSS-167	EPI_ISL_1288368	B.1.1.519	2021-02-11
Mexico|MEX-IBT-IMSS-371|EPI_ISL_1288199|B.1.1.519|2021-02-11	Mexico	MEX-IBT-IMSS-371	EPI_ISL_1288199	B.1.1.519	2021-02-11
Mexico|NLE-UANL-048|EPI_ISL_3701588|B.1.1.519|2021-02-11	Mexico	NLE-UANL-048	EPI_ISL_3701588	B.1.1.519	2021-02-11
Mexico|CHP-IBT-IMSS-122|EPI_ISL_1288329|B.1.1.519|2021-02-11	Mexico	CHP-IBT-IMSS-122	EPI_ISL_1288329	B.1.1.519	2021-02-11
Mexico|MEX-IBT-IMSS-209|EPI_ISL_1288405|B.1.1.519|2021-02-11	Mexico	MEX-IBT-IMSS-209	EPI_ISL_1288405	B.1.1.519	2021-02-11
Mexico|VER-IBT-IMSS-268|EPI_ISL_1288456|B.1.1.519|2021-02-11	Mexico	VER-IBT-IMSS-268	EPI_ISL_1288456	B.1.1.519	2021-02-11
Mexico|CMX-INCMNSZ_COV159238|EPI_ISL_1502815|B.1.1.519|2021-02-11	Mexico	CMX-INCMNSZ_COV159238	EPI_ISL_1502815	B.1.1.519	2021-02-11
Mexico|BCS-IBT-IMSS-106|EPI_ISL_1288316|B.1.1.519|2021-02-11	Mexico	BCS-IBT-IMSS-106	EPI_ISL_1288316	B.1.1.519	2021-02-11
Mexico|MEX-IBT-IMSS-203|EPI_ISL_1288400|B.1.1.519|2021-02-11	Mexico	MEX-IBT-IMSS-203	EPI_ISL_1288400	B.1.1.519	2021-02-11
Mexico|VER-IBT-IMSS-266|EPI_ISL_1288454|B.1.1.519|2021-02-11	Mexico	VER-IBT-IMSS-266	EPI_ISL_1288454	B.1.1.519	2021-02-11
Mexico|PUE-IBT-IMSS-128|EPI_ISL_1288334|B.1.1.519|2021-02-11	Mexico	PUE-IBT-IMSS-128	EPI_ISL_1288334	B.1.1.519	2021-02-11
Mexico|VER-IBT-IMSS-261|EPI_ISL_1288449|B.1.1.519|2021-02-11	Mexico	VER-IBT-IMSS-261	EPI_ISL_1288449	B.1.1.519	2021-02-11
Mexico|VER-IBT-IMSS-259|EPI_ISL_1288448|B.1.1.519|2021-02-11	Mexico	VER-IBT-IMSS-259	EPI_ISL_1288448	B.1.1.519	2021-02-11
Mexico|VER-IBT-IMSS-258|EPI_ISL_1288447|B.1.1.519|2021-02-11	Mexico	VER-IBT-IMSS-258	EPI_ISL_1288447	B.1.1.519	2021-02-11
Mexico|ZAC-INER-IMSS-00028|EPI_ISL_1279327|B.1.1.519|2021-02-11	Mexico	ZAC-INER-IMSS-00028	EPI_ISL_1279327	B.1.1.519	2021-02-11
Mexico|CMX-IBT-IMSS-367|EPI_ISL_1288196|B.1.1.519|2021-02-11	Mexico	CMX-IBT-IMSS-367	EPI_ISL_1288196	B.1.1.519	2021-02-11
USA|NJ-CDC-LC0017984|EPI_ISL_1159975|B.1.1.519|2021-02-11	USA	NJ-CDC-LC0017984	EPI_ISL_1159975	B.1.1.519	2021-02-11
Mexico|MEX-IBT-IMSS-206|EPI_ISL_1288402|B.1.1.519|2021-02-11	Mexico	MEX-IBT-IMSS-206	EPI_ISL_1288402	B.1.1.519	2021-02-11
Mexico|MEX-IBT-IMSS-185|EPI_ISL_1288383|B.1.1.519|2021-02-11	Mexico	MEX-IBT-IMSS-185	EPI_ISL_1288383	B.1.1.519	2021-02-11
Indonesia|JK-NIHRD-C00-21-24581|EPI_ISL_1118207|B.1.1.519|2021-02-11	Indonesia	JK-NIHRD-C00-21-24581	EPI_ISL_1118207	B.1.1.519	2021-02-11
Mexico|SLP-IBT-IMSS-77|EPI_ISL_1288292|B.1.1.519|2021-02-12	Mexico	SLP-IBT-IMSS-77	EPI_ISL_1288292	B.1.1.519	2021-02-12
Mexico|BCS-IBT-IMSS-247|EPI_ISL_1288436|B.1.1.519|2021-02-12	Mexico	BCS-IBT-IMSS-247	EPI_ISL_1288436	B.1.1.519	2021-02-12
Mexico|BCS-IBT-IMSS-250|EPI_ISL_1288438|B.1.1.519|2021-02-12	Mexico	BCS-IBT-IMSS-250	EPI_ISL_1288438	B.1.1.519	2021-02-12
Mexico|CMX-IBT-IMSS-385|EPI_ISL_1288212|B.1.1.519|2021-02-12	Mexico	CMX-IBT-IMSS-385	EPI_ISL_1288212	B.1.1.519	2021-02-12
Mexico|OAX-IBT-IMSS-304|EPI_ISL_1288488|B.1.1.519|2021-02-12	Mexico	OAX-IBT-IMSS-304	EPI_ISL_1288488	B.1.1.519	2021-02-12
USA|TX-CDC-STM-000014260|EPI_ISL_1262340|B.1.1.519|2021-02-12	USA	TX-CDC-STM-000014260	EPI_ISL_1262340	B.1.1.519	2021-02-12
Mexico|YUC-NYGC-10478-21|EPI_ISL_3023896|B.1.1.519|2021-02-12	Mexico	YUC-NYGC-10478-21	EPI_ISL_3023896	B.1.1.519	2021-02-12
Mexico|CMX-INMEGEN-02-12-14|EPI_ISL_1133103|B.1.1.519|2021-02-12	Mexico	CMX-INMEGEN-02-12-14	EPI_ISL_1133103	B.1.1.519	2021-02-12
Mexico|MEX-IBT-IMSS-339|EPI_ISL_1288518|B.1.1.519|2021-02-12	Mexico	MEX-IBT-IMSS-339	EPI_ISL_1288518	B.1.1.519	2021-02-12
Mexico|MEX-IBT-IMSS-199|EPI_ISL_1288396|B.1.1.519|2021-02-12	Mexico	MEX-IBT-IMSS-199	EPI_ISL_1288396	B.1.1.519	2021-02-12
USA|GA-CDC-LC0018314|EPI_ISL_1160067|B.1.1.519|2021-02-12	USA	GA-CDC-LC0018314	EPI_ISL_1160067	B.1.1.519	2021-02-12
Mexico|CMX-IBT-IMSS-147|EPI_ISL_1288350|B.1.1.519|2021-02-12	Mexico	CMX-IBT-IMSS-147	EPI_ISL_1288350	B.1.1.519	2021-02-12
Mexico|VER-IBT-IMSS-157|EPI_ISL_1288359|B.1.1.519|2021-02-12	Mexico	VER-IBT-IMSS-157	EPI_ISL_1288359	B.1.1.519	2021-02-12
Mexico|SLP-IBT-IMSS-287|EPI_ISL_1288473|B.1.1.519|2021-02-12	Mexico	SLP-IBT-IMSS-287	EPI_ISL_1288473	B.1.1.519	2021-02-12
USA|IN-INSPHL-00055|EPI_ISL_1396662|B.1.1.519|2021-02-12	USA	IN-INSPHL-00055	EPI_ISL_1396662	B.1.1.519	2021-02-12
Mexico|CMX-IBT-IMSS-349|EPI_ISL_1288526|B.1.1.222|2021-02-12	Mexico	CMX-IBT-IMSS-349	EPI_ISL_1288526	B.1.1.222	2021-02-12
Mexico|VER-IBT-IMSS-156|EPI_ISL_1288358|B.1.1.519|2021-02-12	Mexico	VER-IBT-IMSS-156	EPI_ISL_1288358	B.1.1.519	2021-02-12
Mexico|VER-IBT-IMSS-150|EPI_ISL_1288352|B.1.1.519|2021-02-12	Mexico	VER-IBT-IMSS-150	EPI_ISL_1288352	B.1.1.519	2021-02-12
Mexico|CMX-IBT-IMSS-345|EPI_ISL_1288524|B.1.1.519|2021-02-12	Mexico	CMX-IBT-IMSS-345	EPI_ISL_1288524	B.1.1.519	2021-02-12
USA|IL-CDC-LC0018125|EPI_ISL_1161178|B.1.1.519|2021-02-12	USA	IL-CDC-LC0018125	EPI_ISL_1161178	B.1.1.519	2021-02-12
Mexico|CMX-IBT-IMSS-293|EPI_ISL_1288478|B.1.1.519|2021-02-12	Mexico	CMX-IBT-IMSS-293	EPI_ISL_1288478	B.1.1.519	2021-02-12
Mexico|MEX-IBT-IMSS-311|EPI_ISL_1288494|B.1.1.519|2021-02-12	Mexico	MEX-IBT-IMSS-311	EPI_ISL_1288494	B.1.1.519	2021-02-12
Mexico|AGU-IBT-IMSS-223|EPI_ISL_1288417|B.1.1.519|2021-02-12	Mexico	AGU-IBT-IMSS-223	EPI_ISL_1288417	B.1.1.519	2021-02-12
USA|OH-CDC-QDX22017137|EPI_ISL_1114614|B.1.1.519|2021-02-12	USA	OH-CDC-QDX22017137	EPI_ISL_1114614	B.1.1.519	2021-02-12
Mexico|SLP-IBT-IMSS-76|EPI_ISL_1288291|B.1.1.519|2021-02-12	Mexico	SLP-IBT-IMSS-76	EPI_ISL_1288291	B.1.1.519	2021-02-12
Mexico|CMX-IBT-IMSS-366|EPI_ISL_1288195|B.1.1.519|2021-02-12	Mexico	CMX-IBT-IMSS-366	EPI_ISL_1288195	B.1.1.519	2021-02-12
Mexico|SLP-IBT-IMSS-71|EPI_ISL_1288286|B.1.1.519|2021-02-12	Mexico	SLP-IBT-IMSS-71	EPI_ISL_1288286	B.1.1.519	2021-02-12
Mexico|MEX-IBT-IMSS-169|EPI_ISL_1288370|B.1.1.519|2021-02-12	Mexico	MEX-IBT-IMSS-169	EPI_ISL_1288370	B.1.1.519	2021-02-12
Mexico|VER-IBT-IMSS-275|EPI_ISL_1288462|B.1.1.519|2021-02-12	Mexico	VER-IBT-IMSS-275	EPI_ISL_1288462	B.1.1.519	2021-02-12
Mexico|TAM-INER-IMSS-00277|EPI_ISL_1279535|B.1.1.519|2021-02-12	Mexico	TAM-INER-IMSS-00277	EPI_ISL_1279535	B.1.1.519	2021-02-12
Mexico|TAM-INER-IMSS-00227|EPI_ISL_1279492|B.1.1.519|2021-02-12	Mexico	TAM-INER-IMSS-00227	EPI_ISL_1279492	B.1.1.519	2021-02-12
Mexico|SLP-IBT-IMSS-69|EPI_ISL_1288285|B.1.1.519|2021-02-12	Mexico	SLP-IBT-IMSS-69	EPI_ISL_1288285	B.1.1.519	2021-02-12
Mexico|CMX-INER-IBT-0870|EPI_ISL_4888542|B.1.1.519|2021-02-13	Mexico	CMX-INER-IBT-0870	EPI_ISL_4888542	B.1.1.519	2021-02-13
USA|NY-PRL-2021_02_15_01B04|EPI_ISL_1041573|B.1.1.519|2021-02-13	USA	NY-PRL-2021_02_15_01B04	EPI_ISL_1041573	B.1.1.519	2021-02-13
Mexico|ZAC-INER-IMSS-00041|EPI_ISL_1279340|B.1.1.519|2021-02-13	Mexico	ZAC-INER-IMSS-00041	EPI_ISL_1279340	B.1.1.519	2021-02-13
USA|PA-CDC-STM-000014089|EPI_ISL_1267841|B.1.1.519|2021-02-13	USA	PA-CDC-STM-000014089	EPI_ISL_1267841	B.1.1.519	2021-02-13
USA|PA-CDC-QDX22019266|EPI_ISL_1158958|B.1.1.519|2021-02-13	USA	PA-CDC-QDX22019266	EPI_ISL_1158958	B.1.1.519	2021-02-13
USA|NY-Wadsworth-21023253-01|EPI_ISL_1671204|B.1.1.519|2021-02-13	USA	NY-Wadsworth-21023253-01	EPI_ISL_1671204	B.1.1.519	2021-02-13
USA|NY-PRL-2021_02_15_03A10|EPI_ISL_1041677|B.1.1.519|2021-02-13	USA	NY-PRL-2021_02_15_03A10	EPI_ISL_1041677	B.1.1.519	2021-02-13
USA|PA-CDC-QDX22031951|EPI_ISL_1159550|B.1.1.519|2021-02-13	USA	PA-CDC-QDX22031951	EPI_ISL_1159550	B.1.1.519	2021-02-13
Mexico|MEX-IBT-IMSS-313|EPI_ISL_1288496|B.1.1.519|2021-02-13	Mexico	MEX-IBT-IMSS-313	EPI_ISL_1288496	B.1.1.519	2021-02-13
Mexico|CHH-INER-IMSS-00272|EPI_ISL_1279531|B.1.1.519|2021-02-13	Mexico	CHH-INER-IMSS-00272	EPI_ISL_1279531	B.1.1.519	2021-02-13
USA|CA-SEARCH-14748|EPI_ISL_1811760|B.1.1.519|2021-02-13	USA	CA-SEARCH-14748	EPI_ISL_1811760	B.1.1.519	2021-02-13
Mexico|CMX-IBT-IMSS-334|EPI_ISL_1288515|B.1.1.519|2021-02-13	Mexico	CMX-IBT-IMSS-334	EPI_ISL_1288515	B.1.1.519	2021-02-13
Mexico|HID-IBT-IMSS-332|EPI_ISL_1288513|B.1.1.519|2021-02-13	Mexico	HID-IBT-IMSS-332	EPI_ISL_1288513	B.1.1.519	2021-02-13
Mexico|MEX-IBT-IMSS-218|EPI_ISL_1288413|B.1.1.519|2021-02-13	Mexico	MEX-IBT-IMSS-218	EPI_ISL_1288413	B.1.1.519	2021-02-13
USA|IL-CDC-LC0018104|EPI_ISL_1161174|B.1.1.519|2021-02-13	USA	IL-CDC-LC0018104	EPI_ISL_1161174	B.1.1.519	2021-02-13
Mexico|NLE-UANL-055|EPI_ISL_3701608|B.1.1.519|2021-02-13	Mexico	NLE-UANL-055	EPI_ISL_3701608	B.1.1.519	2021-02-13
Mexico|MEX-IBT-IMSS-222|EPI_ISL_1288416|B.1.1.519|2021-02-13	Mexico	MEX-IBT-IMSS-222	EPI_ISL_1288416	B.1.1.519	2021-02-13
Mexico|CMX-IBT-IMSS-284|EPI_ISL_1288470|B.1.1.519|2021-02-13	Mexico	CMX-IBT-IMSS-284	EPI_ISL_1288470	B.1.1.519	2021-02-13
Mexico|CMX-INMEGEN-02-12-13|EPI_ISL_1120889|B.1.1.519|2021-02-13	Mexico	CMX-INMEGEN-02-12-13	EPI_ISL_1120889	B.1.1.519	2021-02-13
Mexico|COA-INER-IMSS-00240|EPI_ISL_1279504|B.1.1.519|2021-02-13	Mexico	COA-INER-IMSS-00240	EPI_ISL_1279504	B.1.1.519	2021-02-13
USA|TX-HMH-MCoV-27771|EPI_ISL_1237553|B.1.1.519|2021-02-13	USA	TX-HMH-MCoV-27771	EPI_ISL_1237553	B.1.1.519	2021-02-13
USA|CA-SEARCH-11576|EPI_ISL_1816184|B.1.1.519|2021-02-13	USA	CA-SEARCH-11576	EPI_ISL_1816184	B.1.1.519	2021-02-13
Mexico|ZAC-INER-IMSS-00043|EPI_ISL_1279342|B.1.1.519|2021-02-13	Mexico	ZAC-INER-IMSS-00043	EPI_ISL_1279342	B.1.1.519	2021-02-13
Mexico|MOR-IBT-IMSS-319|EPI_ISL_1288501|B.1.1.519|2021-02-13	Mexico	MOR-IBT-IMSS-319	EPI_ISL_1288501	B.1.1.519	2021-02-13
Mexico|CMX-IBT-IMSS-219|EPI_ISL_1288414|B.1.1.519|2021-02-13	Mexico	CMX-IBT-IMSS-219	EPI_ISL_1288414	B.1.1.519	2021-02-13
USA|CA-CDC-STM-000013727|EPI_ISL_1267758|B.1.1.519|2021-02-13	USA	CA-CDC-STM-000013727	EPI_ISL_1267758	B.1.1.519	2021-02-13
USA|TX-HMH-MCoV-27748|EPI_ISL_1237530|B.1.1.519|2021-02-13	USA	TX-HMH-MCoV-27748	EPI_ISL_1237530	B.1.1.519	2021-02-13
Mexico|HID-IBT-IMSS-254|EPI_ISL_1288443|B.1.1.519|2021-02-13	Mexico	HID-IBT-IMSS-254	EPI_ISL_1288443	B.1.1.519	2021-02-13
Mexico|CMX-IBT-IMSS-285|EPI_ISL_1288471|B.1.1.519|2021-02-14	Mexico	CMX-IBT-IMSS-285	EPI_ISL_1288471	B.1.1.519	2021-02-14
Mexico|ZAC-INER-IMSS-00047|EPI_ISL_1279346|B.1.1.519|2021-02-14	Mexico	ZAC-INER-IMSS-00047	EPI_ISL_1279346	B.1.1.519	2021-02-14
USA|TX-CDC-QDX22056020|EPI_ISL_1139758|B.1.1.519|2021-02-14	USA	TX-CDC-QDX22056020	EPI_ISL_1139758	B.1.1.519	2021-02-14
USA|MD-CDC-QDX22118743|EPI_ISL_1159251|B.1.1.519|2021-02-14	USA	MD-CDC-QDX22118743	EPI_ISL_1159251	B.1.1.519	2021-02-14
Mexico|CMX-IBT-IMSS-341|EPI_ISL_1288520|B.1.1.519|2021-02-14	Mexico	CMX-IBT-IMSS-341	EPI_ISL_1288520	B.1.1.519	2021-02-14
USA|TX-HMH-MCoV-27691|EPI_ISL_1237473|B.1.1.519|2021-02-14	USA	TX-HMH-MCoV-27691	EPI_ISL_1237473	B.1.1.519	2021-02-14
USA|CA-CDPH-3000024454|EPI_ISL_2891532|B.1.1.519|2021-02-14	USA	CA-CDPH-3000024454	EPI_ISL_2891532	B.1.1.519	2021-02-14
Mexico|CMX-IBT-IMSS-342|EPI_ISL_1288521|B.1.1.519|2021-02-14	Mexico	CMX-IBT-IMSS-342	EPI_ISL_1288521	B.1.1.519	2021-02-14
Mexico|MEX-IBT-IMSS-315|EPI_ISL_1288497|B.1.1.519|2021-02-14	Mexico	MEX-IBT-IMSS-315	EPI_ISL_1288497	B.1.1.519	2021-02-14
Mexico|MEX-IBT-IMSS-286|EPI_ISL_1288472|B.1.1.519|2021-02-14	Mexico	MEX-IBT-IMSS-286	EPI_ISL_1288472	B.1.1.519	2021-02-14
USA|TX-CDC-QDX22055601|EPI_ISL_1139750|B.1.1.519|2021-02-14	USA	TX-CDC-QDX22055601	EPI_ISL_1139750	B.1.1.519	2021-02-14
Mexico|ZAC-INER-IMSS-00063|EPI_ISL_1279356|B.1.1.519|2021-02-15	Mexico	ZAC-INER-IMSS-00063	EPI_ISL_1279356	B.1.1.519	2021-02-15
USA|GA-GPHL-0240|EPI_ISL_1651305|B.1.1.519|2021-02-15	USA	GA-GPHL-0240	EPI_ISL_1651305	B.1.1.519	2021-02-15
USA|NC-CDC-LC0018293|EPI_ISL_1161218|B.1.1.519|2021-02-15	USA	NC-CDC-LC0018293	EPI_ISL_1161218	B.1.1.519	2021-02-15
USA|AK-PHL7140|EPI_ISL_1182781|B.1.1.519|2021-02-15	USA	AK-PHL7140	EPI_ISL_1182781	B.1.1.519	2021-02-15
USA|AK-PHL7130|EPI_ISL_1182773|B.1.1.519|2021-02-15	USA	AK-PHL7130	EPI_ISL_1182773	B.1.1.519	2021-02-15
USA|AK-PHL7162|EPI_ISL_1182800|B.1.1.519|2021-02-15	USA	AK-PHL7162	EPI_ISL_1182800	B.1.1.519	2021-02-15
USA|AK-PHL7148|EPI_ISL_1182788|B.1.1.519|2021-02-15	USA	AK-PHL7148	EPI_ISL_1182788	B.1.1.519	2021-02-15
USA|AK-PHL7163|EPI_ISL_1182801|B.1.1.519|2021-02-15	USA	AK-PHL7163	EPI_ISL_1182801	B.1.1.519	2021-02-15
USA|AK-PHL7171|EPI_ISL_1182808|B.1.1.519|2021-02-15	USA	AK-PHL7171	EPI_ISL_1182808	B.1.1.519	2021-02-15
Mexico|NLE-INER-IMSS-00225|EPI_ISL_1279490|B.1.1.519|2021-02-15	Mexico	NLE-INER-IMSS-00225	EPI_ISL_1279490	B.1.1.519	2021-02-15
USA|NV-NSPHL-NV2037163|EPI_ISL_1169844|B.1.1.519|2021-02-15	USA	NV-NSPHL-NV2037163	EPI_ISL_1169844	B.1.1.519	2021-02-15
USA|WY-WPHL-21015044|EPI_ISL_1121029|B.1.1.519|2021-02-15	USA	WY-WPHL-21015044	EPI_ISL_1121029	B.1.1.519	2021-02-15
Mexico|CMX-INMEGEN-03-01-03|EPI_ISL_1168636|B.1.1.519|2021-02-15	Mexico	CMX-INMEGEN-03-01-03	EPI_ISL_1168636	B.1.1.519	2021-02-15
Mexico|MEX-IBT-IMSS-343|EPI_ISL_1288522|B.1.1.519|2021-02-15	Mexico	MEX-IBT-IMSS-343	EPI_ISL_1288522	B.1.1.519	2021-02-15
USA|NMDOH-2021058877|EPI_ISL_1097777|B.1.1.222|2021-02-15	USA	NMDOH-2021058877	EPI_ISL_1097777	B.1.1.222	2021-02-15
Mexico|ZAC-INER-IMSS-00067|EPI_ISL_1279360|B.1.1.519|2021-02-15	Mexico	ZAC-INER-IMSS-00067	EPI_ISL_1279360	B.1.1.519	2021-02-15
USA|OH-CDC-QDX22031724|EPI_ISL_1159434|B.1.1.519|2021-02-15	USA	OH-CDC-QDX22031724	EPI_ISL_1159434	B.1.1.519	2021-02-15
USA|IN-CDC-LC0019370|EPI_ISL_1221366|B.1.1.519|2021-02-15	USA	IN-CDC-LC0019370	EPI_ISL_1221366	B.1.1.519	2021-02-15
USA|AZ-CDC-LC0018818|EPI_ISL_1161328|B.1.1.519|2021-02-15	USA	AZ-CDC-LC0018818	EPI_ISL_1161328	B.1.1.519	2021-02-15
Mexico|CMX-INMEGEN-03-01-06|EPI_ISL_1168639|B.1.1.519|2021-02-15	Mexico	CMX-INMEGEN-03-01-06	EPI_ISL_1168639	B.1.1.519	2021-02-15
USA|NJ-NYGC-S-OM-5359-DUER454|EPI_ISL_1912906|B.1.1.519|2021-02-15	USA	NJ-NYGC-S-OM-5359-DUER454	EPI_ISL_1912906	B.1.1.519	2021-02-15
Mexico|CMX-INMEGEN-02-12-23|EPI_ISL_1120895|B.1.1.519|2021-02-15	Mexico	CMX-INMEGEN-02-12-23	EPI_ISL_1120895	B.1.1.519	2021-02-15
USA|PA-CDC-QDX22118055|EPI_ISL_1139344|B.1.1.519|2021-02-15	USA	PA-CDC-QDX22118055	EPI_ISL_1139344	B.1.1.519	2021-02-15
Mexico|CMX-INMEGEN-02-12-10|EPI_ISL_1120887|B.1.1.519|2021-02-15	Mexico	CMX-INMEGEN-02-12-10	EPI_ISL_1120887	B.1.1.519	2021-02-15
Mexico|QUE-InDRE_F89B_S611|EPI_ISL_1340654|B.1.1.519|2021-02-15	Mexico	QUE-InDRE_F89B_S611	EPI_ISL_1340654	B.1.1.519	2021-02-15
Mexico|VER-INER-IMSS-00174|EPI_ISL_1279448|B.1.1.519|2021-02-15	Mexico	VER-INER-IMSS-00174	EPI_ISL_1279448	B.1.1.519	2021-02-15
USA|TX-DSHS-3465|EPI_ISL_1225053|B.1.1.519|2021-02-15	USA	TX-DSHS-3465	EPI_ISL_1225053	B.1.1.519	2021-02-15
Mexico|CMX-INMEGEN-03-01-05|EPI_ISL_1168638|B.1.1.519|2021-02-15	Mexico	CMX-INMEGEN-03-01-05	EPI_ISL_1168638	B.1.1.519	2021-02-15
Mexico|CMX-INMEGEN-03-04-07|EPI_ISL_1205209|B.1.1.519|2021-02-15	Mexico	CMX-INMEGEN-03-04-07	EPI_ISL_1205209	B.1.1.519	2021-02-15
Mexico|YUC-NYGC-10806-21|EPI_ISL_3023977|B.1.1.519|2021-02-16	Mexico	YUC-NYGC-10806-21	EPI_ISL_3023977	B.1.1.519	2021-02-16
Mexico|YUC-NYGC-10773-21|EPI_ISL_3023804|B.1.1.519|2021-02-16	Mexico	YUC-NYGC-10773-21	EPI_ISL_3023804	B.1.1.519	2021-02-16
USA|LA-CDC-LC0018614|EPI_ISL_1161280|B.1.1.519|2021-02-16	USA	LA-CDC-LC0018614	EPI_ISL_1161280	B.1.1.519	2021-02-16
USA|LA-CDC-STM-000017170|EPI_ISL_1582770|B.1.1.519|2021-02-16	USA	LA-CDC-STM-000017170	EPI_ISL_1582770	B.1.1.519	2021-02-16
USA|MA-Broad_CRSP-01303|EPI_ISL_1253854|B.1.1.519|2021-02-16	USA	MA-Broad_CRSP-01303	EPI_ISL_1253854	B.1.1.519	2021-02-16
USA|NH-CDC-QDX22162996|EPI_ISL_1193993|B.1.1.519|2021-02-16	USA	NH-CDC-QDX22162996	EPI_ISL_1193993	B.1.1.519	2021-02-16
USA|AK-PHL7215|EPI_ISL_1195939|B.1.1.519|2021-02-16	USA	AK-PHL7215	EPI_ISL_1195939	B.1.1.519	2021-02-16
USA|AK-PHL7223|EPI_ISL_1182716|B.1.1.519|2021-02-16	USA	AK-PHL7223	EPI_ISL_1182716	B.1.1.519	2021-02-16
USA|AK-PHL7229|EPI_ISL_1182722|B.1.1.519|2021-02-16	USA	AK-PHL7229	EPI_ISL_1182722	B.1.1.519	2021-02-16
Mexico|MOR-InDRE_F10613_S685|EPI_ISL_1365650|B.1.1.519|2021-02-16	Mexico	MOR-InDRE_F10613_S685	EPI_ISL_1365650	B.1.1.519	2021-02-16
Mexico|NLE-INER-IMSS-00232|EPI_ISL_1279496|B.1.1.519|2021-02-16	Mexico	NLE-INER-IMSS-00232	EPI_ISL_1279496	B.1.1.519	2021-02-16
USA|TX-CDC-QDX22285478|EPI_ISL_1220803|B.1.1.519|2021-02-16	USA	TX-CDC-QDX22285478	EPI_ISL_1220803	B.1.1.519	2021-02-16
USA|UT-UPHL-2103932795|EPI_ISL_1300551|B.1.1.519|2021-02-16	USA	UT-UPHL-2103932795	EPI_ISL_1300551	B.1.1.519	2021-02-16
Mexico|DUR-INER-IMSS-00275|EPI_ISL_1279533|B.1.1.519|2021-02-16	Mexico	DUR-INER-IMSS-00275	EPI_ISL_1279533	B.1.1.519	2021-02-16
Mexico|QUE-InDRE_F9843_S620|EPI_ISL_1340636|B.1.1.519|2021-02-16	Mexico	QUE-InDRE_F9843_S620	EPI_ISL_1340636	B.1.1.519	2021-02-16
USA|TX-CDC-QDX22287725|EPI_ISL_1194262|B.1.1.519|2021-02-16	USA	TX-CDC-QDX22287725	EPI_ISL_1194262	B.1.1.519	2021-02-16
[truncated: 3,868 more rows]

## Sheet: B_1_1_7
Name	Country	ID	GSAID	Lineage	Date
[truncated: 7,049 more rows]

[truncated: 2 more sheets: P_1, B_1_617_2]
