# Supplementary material for: Comparing the evolutionary dynamics of predominant SARS-CoV-2 virus lineages co-circulating in Mexico
Source: eLife. 2023 Jul 27;12:e82069. doi: 10.7554/eLife.82069 (PMC10431917; doi:10.7554/eLife.82069)
Supplement: Supplementary file 2. [file elife-82069-supp2.xlsx]

## Sheet: B_1_1_7_C1a
Name	Country	States	ID	GSAID	Lineage	Date
Mexico|VER_LANGEBIO_IMSS_0428|EPI_ISL_1662210|B.1.1.7|2021-03-23	Mexico	VER	VER_LANGEBIO_IMSS_0428	EPI_ISL_1662210	B.1.1.7	2021-03-23
Mexico|OAX-InDRE_FB13216_S1507|EPI_ISL_1805485|B.1.1.7|2021-04-01	Mexico	OAX	OAX-InDRE_FB13216_S1507	EPI_ISL_1805485	B.1.1.7	2021-04-01
Mexico|OAX-InDRE_FB13300_S1504|EPI_ISL_1805482|B.1.1.7|2021-04-08	Mexico	OAX	OAX-InDRE_FB13300_S1504	EPI_ISL_1805482	B.1.1.7	2021-04-08
Mexico|JAL_INER_IMSS_00822|EPI_ISL_2091273|B.1.1.7|2021-04-09	Mexico	JAL	JAL_INER_IMSS_00822	EPI_ISL_2091273	B.1.1.7	2021-04-09
Mexico|CMX-InDRE_FD49735_S1767|EPI_ISL_2101906|B.1.1.7|2021-04-12	Mexico	CMX	CMX-InDRE_FD49735_S1767	EPI_ISL_2101906	B.1.1.7	2021-04-12
Mexico|OAX-InDRE_FB14529_S2040|EPI_ISL_2283684|B.1.1.7|2021-04-15	Mexico	OAX	OAX-InDRE_FB14529_S2040	EPI_ISL_2283684	B.1.1.7	2021-04-15
Mexico|CMX-INMEGEN-04-07-243|EPI_ISL_2080658|B.1.1.7|2021-04-26	Mexico	CMX	CMX-INMEGEN-04-07-243	EPI_ISL_2080658	B.1.1.7	2021-04-26
Mexico|CMX-INMEGEN-05-01-229|EPI_ISL_2105749|B.1.1.7|2021-04-27	Mexico	CMX	CMX-INMEGEN-05-01-229	EPI_ISL_2105749	B.1.1.7	2021-04-27
Mexico|MEX-INMEGEN-05-01-240|EPI_ISL_2105759|B.1.1.7|2021-04-27	Mexico	MEX	MEX-INMEGEN-05-01-240	EPI_ISL_2105759	B.1.1.7	2021-04-27
Mexico|QUE-InDRE_FB15641_S2374|EPI_ISL_2455899|B.1.1.7|2021-04-27	Mexico	QUE	QUE-InDRE_FB15641_S2374	EPI_ISL_2455899	B.1.1.7	2021-04-27
Mexico|CMX-INMEGEN-05-01-108|EPI_ISL_2230864|B.1.1.7|2021-04-28	Mexico	CMX	CMX-INMEGEN-05-01-108	EPI_ISL_2230864	B.1.1.7	2021-04-28
Mexico|CMX-INMEGEN-05-01-98|EPI_ISL_2230863|B.1.1.7|2021-04-28	Mexico	CMX	CMX-INMEGEN-05-01-98	EPI_ISL_2230863	B.1.1.7	2021-04-28
Mexico|CMX-INMEGEN-05-01-301|EPI_ISL_2105810|B.1.1.7|2021-04-29	Mexico	CMX	CMX-INMEGEN-05-01-301	EPI_ISL_2105810	B.1.1.7	2021-04-29
Mexico|CMX-INMEGEN-05-02-108|EPI_ISL_2230830|B.1.1.7|2021-04-29	Mexico	CMX	CMX-INMEGEN-05-02-108	EPI_ISL_2230830	B.1.1.7	2021-04-29
Mexico|CMX-INMEGEN-05-02-122|EPI_ISL_2230874|B.1.1.7|2021-04-29	Mexico	CMX	CMX-INMEGEN-05-02-122	EPI_ISL_2230874	B.1.1.7	2021-04-29
Mexico|MEX-INMEGEN-05-02-104|EPI_ISL_2230871|B.1.1.7|2021-04-29	Mexico	MEX	MEX-INMEGEN-05-02-104	EPI_ISL_2230871	B.1.1.7	2021-04-29
Mexico|VER_IBT_IMSS_06858-NC|EPI_ISL_3091105|B.1.1.7|2021-05-02	Mexico	VER	VER_IBT_IMSS_06858-NC	EPI_ISL_3091105	B.1.1.7	2021-05-02
Mexico|GUA-InDRE_FB14800_S2082|EPI_ISL_2283721|B.1.1.7|2021-05-03	Mexico	GUA	GUA-InDRE_FB14800_S2082	EPI_ISL_2283721	B.1.1.7	2021-05-03
Mexico|MEX-INMEGEN-05-02-2|EPI_ISL_2230866|B.1.1.7|2021-05-03	Mexico	MEX	MEX-INMEGEN-05-02-2	EPI_ISL_2230866	B.1.1.7	2021-05-03
Mexico|CMX-INMEGEN-05-02-29|EPI_ISL_2230868|B.1.1.7|2021-05-05	Mexico	CMX	CMX-INMEGEN-05-02-29	EPI_ISL_2230868	B.1.1.7	2021-05-05
Mexico|GUA-InDRE_FB14826_S2470|EPI_ISL_2455991|B.1.1.7|2021-05-05	Mexico	GUA	GUA-InDRE_FB14826_S2470	EPI_ISL_2455991	B.1.1.7	2021-05-05
Mexico|GUA-InDRE_FB14839_S2469|EPI_ISL_2455990|B.1.1.7|2021-05-05	Mexico	GUA	GUA-InDRE_FB14839_S2469	EPI_ISL_2455990	B.1.1.7	2021-05-05
Mexico|MEX-INMEGEN-05-03-328|EPI_ISL_2319396|B.1.1.7|2021-05-05	Mexico	MEX	MEX-INMEGEN-05-03-328	EPI_ISL_2319396	B.1.1.7	2021-05-05
Mexico|MEX-INMEGEN-05-02-23|EPI_ISL_2230841|B.1.1.7|2021-05-05	Mexico	MEX	MEX-INMEGEN-05-02-23	EPI_ISL_2230841	B.1.1.7	2021-05-05
Mexico|CMX-INMEGEN-05-03-351|EPI_ISL_2319406|B.1.1.7|2021-05-06	Mexico	CMX	CMX-INMEGEN-05-03-351	EPI_ISL_2319406	B.1.1.7	2021-05-06
Mexico|MEX_IBT_IMSS_1249|EPI_ISL_2391647|B.1.1.7|2021-05-06	Mexico	MEX	MEX_IBT_IMSS_1249	EPI_ISL_2391647	B.1.1.7	2021-05-06
Mexico|CMX-InDRE_FD64062_S2068|EPI_ISL_2283708|B.1.1.7|2021-05-07	Mexico	CMX	CMX-InDRE_FD64062_S2068	EPI_ISL_2283708	B.1.1.7	2021-05-07
Mexico|CMX-INMEGEN-05-03-53|EPI_ISL_2319212|B.1.1.7|2021-05-07	Mexico	CMX	CMX-INMEGEN-05-03-53	EPI_ISL_2319212	B.1.1.7	2021-05-07
Mexico|MEX-INMEGEN-05-03-5|EPI_ISL_2319175|B.1.1.7|2021-05-07	Mexico	MEX	MEX-INMEGEN-05-03-5	EPI_ISL_2319175	B.1.1.7	2021-05-07
Mexico|CMX-INMEGEN-05-03-64|EPI_ISL_2319221|B.1.1.7|2021-05-08	Mexico	CMX	CMX-INMEGEN-05-03-64	EPI_ISL_2319221	B.1.1.7	2021-05-08
Mexico|MEX-INMEGEN-05-03-69|EPI_ISL_2319226|B.1.1.7|2021-05-08	Mexico	MEX	MEX-INMEGEN-05-03-69	EPI_ISL_2319226	B.1.1.7	2021-05-08
Mexico|OAX-InDRE_FB14970_S2052|EPI_ISL_2283694|B.1.1.7|2021-05-08	Mexico	OAX	OAX-InDRE_FB14970_S2052	EPI_ISL_2283694	B.1.1.7	2021-05-08
Mexico|HID-INMEGEN-05-03-160|EPI_ISL_2319293|B.1.1.7|2021-05-09	Mexico	HID	HID-INMEGEN-05-03-160	EPI_ISL_2319293	B.1.1.7	2021-05-09
Mexico|MEX-INMEGEN-05-03-118|EPI_ISL_2319264|B.1.1.7|2021-05-09	Mexico	MEX	MEX-INMEGEN-05-03-118	EPI_ISL_2319264	B.1.1.7	2021-05-09
Mexico|CMX-INMEGEN-05-04-15|EPI_ISL_2349893|B.1.1.7|2021-05-11	Mexico	CMX	CMX-INMEGEN-05-04-15	EPI_ISL_2349893	B.1.1.7	2021-05-11
Mexico|CMX-INMEGEN-05-04-300|EPI_ISL_2350092|B.1.1.7|2021-05-13	Mexico	CMX	CMX-INMEGEN-05-04-300	EPI_ISL_2350092	B.1.1.7	2021-05-13
Mexico|MEX-INMEGEN-05-04-110|EPI_ISL_2349965|B.1.1.7|2021-05-13	Mexico	MEX	MEX-INMEGEN-05-04-110	EPI_ISL_2349965	B.1.1.7	2021-05-13
Mexico|MEX-INMEGEN-05-04-283|EPI_ISL_2350081|B.1.1.7|2021-05-13	Mexico	MEX	MEX-INMEGEN-05-04-283	EPI_ISL_2350081	B.1.1.7	2021-05-13
Mexico|MEX-INMEGEN-05-04-296|EPI_ISL_2350090|B.1.1.7|2021-05-13	Mexico	MEX	MEX-INMEGEN-05-04-296	EPI_ISL_2350090	B.1.1.7	2021-05-13
Mexico|OAX-InDRE_FB15918_S2397|EPI_ISL_2455922|B.1.1.7|2021-05-13	Mexico	OAX	OAX-InDRE_FB15918_S2397	EPI_ISL_2455922	B.1.1.7	2021-05-13
Mexico|CMX-INMEGEN-05-04-172|EPI_ISL_2350006|B.1.1.7|2021-05-14	Mexico	CMX	CMX-INMEGEN-05-04-172	EPI_ISL_2350006	B.1.1.7	2021-05-14
Mexico|MEX-INMEGEN-05-04-133|EPI_ISL_2349979|B.1.1.7|2021-05-14	Mexico	MEX	MEX-INMEGEN-05-04-133	EPI_ISL_2349979	B.1.1.7	2021-05-14
Mexico|MEX-INMEGEN-05-04-245|EPI_ISL_2350057|B.1.1.7|2021-05-15	Mexico	MEX	MEX-INMEGEN-05-04-245	EPI_ISL_2350057	B.1.1.7	2021-05-15
Mexico|MEX-INMEGEN-05-04-229|EPI_ISL_2350045|B.1.1.7|2021-05-15	Mexico	MEX	MEX-INMEGEN-05-04-229	EPI_ISL_2350045	B.1.1.7	2021-05-15
Mexico|MEX-INMEGEN-05-04-248|EPI_ISL_2350059|B.1.1.7|2021-05-15	Mexico	MEX	MEX-INMEGEN-05-04-248	EPI_ISL_2350059	B.1.1.7	2021-05-15
Mexico|MEX-INMEGEN-05-04-262|EPI_ISL_2350068|B.1.1.7|2021-05-15	Mexico	MEX	MEX-INMEGEN-05-04-262	EPI_ISL_2350068	B.1.1.7	2021-05-15
Mexico|MEX-INMEGEN-05-04-253|EPI_ISL_2350062|B.1.1.7|2021-05-15	Mexico	MEX	MEX-INMEGEN-05-04-253	EPI_ISL_2350062	B.1.1.7	2021-05-15
Mexico|CMX_IBT_IMSS_11022-NC|EPI_ISL_2681369|B.1.1.7|2021-05-17	Mexico	CMX	CMX_IBT_IMSS_11022-NC	EPI_ISL_2681369	B.1.1.7	2021-05-17
Mexico|CMX-LANGEBIO_IMSS_1069|EPI_ISL_2671531|B.1.1.7|2021-05-17	Mexico	CMX	CMX-LANGEBIO_IMSS_1069	EPI_ISL_2671531	B.1.1.7	2021-05-17
Mexico|MEX-INMEGEN-05-04-357|EPI_ISL_2350124|B.1.1.7|2021-05-17	Mexico	MEX	MEX-INMEGEN-05-04-357	EPI_ISL_2350124	B.1.1.7	2021-05-17
Mexico|CMX_IBT_IMSS_1510|EPI_ISL_2681352|B.1.1.7|2021-05-19	Mexico	CMX	CMX_IBT_IMSS_1510	EPI_ISL_2681352	B.1.1.7	2021-05-19
Mexico|CMX-InDRE_FD69743_S3075|EPI_ISL_2663342|B.1.1.7|2021-05-19	Mexico	CMX	CMX-InDRE_FD69743_S3075	EPI_ISL_2663342	B.1.1.7	2021-05-19
Mexico|CMX-InDRE_FD71149_S2784|EPI_ISL_2533810|B.1.1.7|2021-05-19	Mexico	CMX	CMX-InDRE_FD71149_S2784	EPI_ISL_2533810	B.1.1.7	2021-05-19
Mexico|CMX-LANGEBIO_IMSS_1117|EPI_ISL_2671536|B.1.1.7|2021-05-20	Mexico	CMX	CMX-LANGEBIO_IMSS_1117	EPI_ISL_2671536	B.1.1.7	2021-05-20
Mexico|CMX-LANGEBIO_IMSS_1122|EPI_ISL_2671538|B.1.1.7|2021-05-20	Mexico	CMX	CMX-LANGEBIO_IMSS_1122	EPI_ISL_2671538	B.1.1.7	2021-05-20
Mexico|CMX-InDRE_FD71474_S2785|EPI_ISL_2533811|B.1.1.7|2021-05-20	Mexico	CMX	CMX-InDRE_FD71474_S2785	EPI_ISL_2533811	B.1.1.7	2021-05-20
Mexico|CMX-INMEGEN-05-05-130|EPI_ISL_2444478|B.1.1.7|2021-05-21	Mexico	CMX	CMX-INMEGEN-05-05-130	EPI_ISL_2444478	B.1.1.7	2021-05-21
Mexico|CMX-INMEGEN-05-05-111|EPI_ISL_2881801|B.1.1.7|2021-05-21	Mexico	CMX	CMX-INMEGEN-05-05-111	EPI_ISL_2881801	B.1.1.7	2021-05-21
Mexico|MEX-INMEGEN-05-05-166|EPI_ISL_2444500|B.1.1.7|2021-05-21	Mexico	MEX	MEX-INMEGEN-05-05-166	EPI_ISL_2444500	B.1.1.7	2021-05-21
Mexico|MEX-INMEGEN-05-05-148|EPI_ISL_2444489|B.1.1.7|2021-05-21	Mexico	MEX	MEX-INMEGEN-05-05-148	EPI_ISL_2444489	B.1.1.7	2021-05-21
Mexico|MEX-INMEGEN-05-05-40|EPI_ISL_2444425|B.1.1.7|2021-05-21	Mexico	MEX	MEX-INMEGEN-05-05-40	EPI_ISL_2444425	B.1.1.7	2021-05-21
Mexico|MEX-INMEGEN-05-05-50|EPI_ISL_2444432|B.1.1.7|2021-05-21	Mexico	MEX	MEX-INMEGEN-05-05-50	EPI_ISL_2444432	B.1.1.7	2021-05-21
Mexico|CMX-InDRE_FD72355_S2787|EPI_ISL_2533813|B.1.1.7|2021-05-22	Mexico	CMX	CMX-InDRE_FD72355_S2787	EPI_ISL_2533813	B.1.1.7	2021-05-22
Mexico|CMX-INMEGEN-05-06-22|EPI_ISL_2603611|B.1.1.7|2021-05-24	Mexico	CMX	CMX-INMEGEN-05-06-22	EPI_ISL_2603611	B.1.1.7	2021-05-24
Mexico|CMX-INMEGEN-05-06-28|EPI_ISL_2603615|B.1.1.7|2021-05-25	Mexico	CMX	CMX-INMEGEN-05-06-28	EPI_ISL_2603615	B.1.1.7	2021-05-25
Mexico|CMX-INMEGEN-05-06-172|EPI_ISL_2603665|B.1.1.7|2021-05-25	Mexico	CMX	CMX-INMEGEN-05-06-172	EPI_ISL_2603665	B.1.1.7	2021-05-25
Mexico|CMX-INMEGEN-05-06-185|EPI_ISL_2603676|B.1.1.7|2021-05-25	Mexico	CMX	CMX-INMEGEN-05-06-185	EPI_ISL_2603676	B.1.1.7	2021-05-25
Mexico|CMX_IBT_IMSS_1556|EPI_ISL_2681313|B.1.1.7|2021-05-26	Mexico	CMX	CMX_IBT_IMSS_1556	EPI_ISL_2681313	B.1.1.7	2021-05-26
Mexico|GUA-InDRE_FB16466_S3504|EPI_ISL_2779019|B.1.1.7|2021-05-26	Mexico	GUA	GUA-InDRE_FB16466_S3504	EPI_ISL_2779019	B.1.1.7	2021-05-26
Mexico|GUA-InDRE_FB16465_S3477|EPI_ISL_2778992|B.1.1.7|2021-05-26	Mexico	GUA	GUA-InDRE_FB16465_S3477	EPI_ISL_2778992	B.1.1.7	2021-05-26
Mexico|CMX-INMEGEN-05-06-61|EPI_ISL_2603636|B.1.1.7|2021-05-27	Mexico	CMX	CMX-INMEGEN-05-06-61	EPI_ISL_2603636	B.1.1.7	2021-05-27
Mexico|MEX-INMEGEN-05-06-250|EPI_ISL_2603723|B.1.1.7|2021-05-28	Mexico	MEX	MEX-INMEGEN-05-06-250	EPI_ISL_2603723	B.1.1.7	2021-05-28
Mexico|MEX-INMEGEN-05-06-218|EPI_ISL_2881838|B.1.1.7|2021-05-28	Mexico	MEX	MEX-INMEGEN-05-06-218	EPI_ISL_2881838	B.1.1.7	2021-05-28
Mexico|HID-InDRE_FB17224_S3099|EPI_ISL_2663366|B.1.1.7|2021-05-29	Mexico	HID	HID-InDRE_FB17224_S3099	EPI_ISL_2663366	B.1.1.7	2021-05-29
Mexico|MEX-INMEGEN-06-01-10|EPI_ISL_2616828|B.1.1.7|2021-05-30	Mexico	MEX	MEX-INMEGEN-06-01-10	EPI_ISL_2616828	B.1.1.7	2021-05-30
Mexico|MEX-INMEGEN-06-01-9|EPI_ISL_2616850|B.1.1.7|2021-05-30	Mexico	MEX	MEX-INMEGEN-06-01-9	EPI_ISL_2616850	B.1.1.7	2021-05-30
Mexico|CMX_IBT_IMSS_1627|EPI_ISL_2681216|B.1.1.7|2021-05-31	Mexico	CMX	CMX_IBT_IMSS_1627	EPI_ISL_2681216	B.1.1.7	2021-05-31
Mexico|GUA-InDRE_FB16891_S3116|EPI_ISL_2663383|B.1.1.7|2021-05-31	Mexico	GUA	GUA-InDRE_FB16891_S3116	EPI_ISL_2663383	B.1.1.7	2021-05-31
Mexico|YUC-InDRE_FB16551_S3112|EPI_ISL_2663379|B.1.1.7|2021-05-31	Mexico	YUC	YUC-InDRE_FB16551_S3112	EPI_ISL_2663379	B.1.1.7	2021-05-31
Mexico|GUA-InDRE_FB16911_S3121|EPI_ISL_2663388|B.1.1.7|2021-06-03	Mexico	GUA	GUA-InDRE_FB16911_S3121	EPI_ISL_2663388	B.1.1.7	2021-06-03
Mexico|MEX-INMEGEN-06-03-129|EPI_ISL_2810121|B.1.1.7|2021-06-03	Mexico	MEX	MEX-INMEGEN-06-03-129	EPI_ISL_2810121	B.1.1.7	2021-06-03
Mexico|MEX-INMEGEN-06-03-135|EPI_ISL_2810126|B.1.1.7|2021-06-03	Mexico	MEX	MEX-INMEGEN-06-03-135	EPI_ISL_2810126	B.1.1.7	2021-06-03
Mexico|TAB-InDRE_FB16948_S3074|EPI_ISL_2663341|B.1.1.7|2021-06-03	Mexico	TAB	TAB-InDRE_FB16948_S3074	EPI_ISL_2663341	B.1.1.7	2021-06-03
Mexico|CMX-INMEGEN-06-03-138|EPI_ISL_2810128|B.1.1.7|2021-06-04	Mexico	CMX	CMX-INMEGEN-06-03-138	EPI_ISL_2810128	B.1.1.7	2021-06-04
Mexico|SON-InDRE_FB17171_S3087|EPI_ISL_2663354|B.1.1.7|2021-06-04	Mexico	SON	SON-InDRE_FB17171_S3087	EPI_ISL_2663354	B.1.1.7	2021-06-04
Mexico|ROO-INMEGEN-06-02-40|EPI_ISL_2692575|B.1.1.7|2021-06-05	Mexico	ROO	ROO-INMEGEN-06-02-40	EPI_ISL_2692575	B.1.1.7	2021-06-05
Mexico|TAB_IBT_IMSS_2060|EPI_ISL_3133725|B.1.1.7|2021-06-05	Mexico	TAB	TAB_IBT_IMSS_2060	EPI_ISL_3133725	B.1.1.7	2021-06-05
Mexico|CMX-INMEGEN-06-04-64|EPI_ISL_2894208|B.1.1.7|2021-06-09	Mexico	CMX	CMX-INMEGEN-06-04-64	EPI_ISL_2894208	B.1.1.7	2021-06-09
Mexico|CMX-INMEGEN-06-03-319|EPI_ISL_2810277|B.1.1.7|2021-06-09	Mexico	CMX	CMX-INMEGEN-06-03-319	EPI_ISL_2810277	B.1.1.7	2021-06-09
Mexico|TAB-InDRE_FB17300_S3471|EPI_ISL_2778986|B.1.1.7|2021-06-09	Mexico	TAB	TAB-InDRE_FB17300_S3471	EPI_ISL_2778986	B.1.1.7	2021-06-09
Mexico|VER-INMEGEN-06-04-13|EPI_ISL_2894163|B.1.1.7|2021-06-09	Mexico	VER	VER-INMEGEN-06-04-13	EPI_ISL_2894163	B.1.1.7	2021-06-09
Mexico|CMX-INMEGEN-06-04-66|EPI_ISL_2894210|B.1.1.7|2021-06-10	Mexico	CMX	CMX-INMEGEN-06-04-66	EPI_ISL_2894210	B.1.1.7	2021-06-10
Mexico|ROO-INMEGEN-06-04-14|EPI_ISL_2894164|B.1.1.7|2021-06-10	Mexico	ROO	ROO-INMEGEN-06-04-14	EPI_ISL_2894164	B.1.1.7	2021-06-10
Mexico|PUE-InDRE_FB17764_S3525|EPI_ISL_2779040|B.1.1.7|2021-06-11	Mexico	PUE	PUE-InDRE_FB17764_S3525	EPI_ISL_2779040	B.1.1.7	2021-06-11
Mexico|TAB-InDRE_FB17802_S3531|EPI_ISL_2779046|B.1.1.7|2021-06-15	Mexico	TAB	TAB-InDRE_FB17802_S3531	EPI_ISL_2779046	B.1.1.7	2021-06-15
Mexico|PUE-InDRE_FB19607_S4512|EPI_ISL_3033365|B.1.1.7|2021-06-16	Mexico	PUE	PUE-InDRE_FB19607_S4512	EPI_ISL_3033365	B.1.1.7	2021-06-16
Mexico|TAB-InDRE_FB18209_S3964|EPI_ISL_2858978|B.1.1.7|2021-06-21	Mexico	TAB	TAB-InDRE_FB18209_S3964	EPI_ISL_2858978	B.1.1.7	2021-06-21
Mexico|TAB-InDRE_FB18192_S3961|EPI_ISL_2858975|B.1.1.7|2021-06-21	Mexico	TAB	TAB-InDRE_FB18192_S3961	EPI_ISL_2858975	B.1.1.7	2021-06-21
Mexico|PUE-InDRE_FB19630_S4515|EPI_ISL_3033368|B.1.1.7|2021-06-22	Mexico	PUE	PUE-InDRE_FB19630_S4515	EPI_ISL_3033368	B.1.1.7	2021-06-22
Mexico|PUE-InDRE_FB19629_S4514|EPI_ISL_3033367|B.1.1.7|2021-06-22	Mexico	PUE	PUE-InDRE_FB19629_S4514	EPI_ISL_3033367	B.1.1.7	2021-06-22
Mexico|CMX-INMEGEN-06-03-33|EPI_ISL_2810051|B.1.1.7|2021-06-24	Mexico	CMX	CMX-INMEGEN-06-03-33	EPI_ISL_2810051	B.1.1.7	2021-06-24
Mexico|CMX-INMEGEN-06-03-41|EPI_ISL_2810058|B.1.1.7|2021-06-24	Mexico	CMX	CMX-INMEGEN-06-03-41	EPI_ISL_2810058	B.1.1.7	2021-06-24
Mexico|CMX-INMEGEN-06-03-39|EPI_ISL_2810056|B.1.1.7|2021-06-24	Mexico	CMX	CMX-INMEGEN-06-03-39	EPI_ISL_2810056	B.1.1.7	2021-06-24
Mexico|TAB-InDRE_FB18518_S4149|EPI_ISL_2920720|B.1.1.7|2021-06-25	Mexico	TAB	TAB-InDRE_FB18518_S4149	EPI_ISL_2920720	B.1.1.7	2021-06-25
Mexico|HID-INMEGEN-17-102|EPI_ISL_3067908|B.1.1.7|2021-07-05	Mexico	HID	HID-INMEGEN-17-102	EPI_ISL_3067908	B.1.1.7	2021-07-05

## Sheet: B_1_1_7_C2a
Name	Country	State	ID	GSAID	Lineage	Date
England|CAMC-1216390|EPI_ISL_1007203|B.1.1.7|2021-02-05	England	Other	CAMC-1216390	EPI_ISL_1007203	B.1.1.7	2021-02-05
Mexico|CHH_INER_IMSS_00383|EPI_ISL_1585393|B.1.1.7|2021-03-05	Mexico	CHH	CHH_INER_IMSS_00383	EPI_ISL_1585393	B.1.1.7	2021-03-05
Mexico|CHH-InDRE_F11642_S896|EPI_ISL_1423506|B.1.1.7|2021-03-08	Mexico	CHH	CHH-InDRE_F11642_S896	EPI_ISL_1423506	B.1.1.7	2021-03-08
Mexico|CHH-InDRE_F12156_S1188|EPI_ISL_1626795|B.1.1.7|2021-03-15	Mexico	CHH	CHH-InDRE_F12156_S1188	EPI_ISL_1626795	B.1.1.7	2021-03-15
Mexico|CHH-InDRE_F12165_S1192|EPI_ISL_1626799|B.1.1.7|2021-03-17	Mexico	CHH	CHH-InDRE_F12165_S1192	EPI_ISL_1626799	B.1.1.7	2021-03-17
Mexico|CHH-InDRE_F12359_S1197|EPI_ISL_1626804|B.1.1.7|2021-03-22	Mexico	CHH	CHH-InDRE_F12359_S1197	EPI_ISL_1626804	B.1.1.7	2021-03-22
Mexico|CHH_LANGEBIO_IMSS_46001-NC|EPI_ISL_2969877|B.1.1.7|2021-03-22	Mexico	CHH	CHH_LANGEBIO_IMSS_46001-NC	EPI_ISL_2969877	B.1.1.7	2021-03-22
Mexico|CHH_LANGEBIO_IMSS_0278|EPI_ISL_1661987|B.1.1.7|2021-03-26	Mexico	CHH	CHH_LANGEBIO_IMSS_0278	EPI_ISL_1661987	B.1.1.7	2021-03-26
Mexico|CHH-InDRE_FB12868_S1488|EPI_ISL_1805466|B.1.1.7|2021-03-30	Mexico	CHH	CHH-InDRE_FB12868_S1488	EPI_ISL_1805466	B.1.1.7	2021-03-30
Mexico|CHH-InDRE_FB12878_S1491|EPI_ISL_1805469|B.1.1.7|2021-04-02	Mexico	CHH	CHH-InDRE_FB12878_S1491	EPI_ISL_1805469	B.1.1.7	2021-04-02
Mexico|CHH-InDRE_FB12877_S1490|EPI_ISL_1805468|B.1.1.7|2021-04-04	Mexico	CHH	CHH-InDRE_FB12877_S1490	EPI_ISL_1805468	B.1.1.7	2021-04-04
Mexico|CHH-InDRE_FB13242_S1496|EPI_ISL_1805474|B.1.1.7|2021-04-05	Mexico	CHH	CHH-InDRE_FB13242_S1496	EPI_ISL_1805474	B.1.1.7	2021-04-05
Mexico|CMX-INMEGEN-InDRE-04-04-99|EPI_ISL_1628598|B.1.1.7|2021-04-05	Mexico	CMX	CMX-INMEGEN-InDRE-04-04-99	EPI_ISL_1628598	B.1.1.7	2021-04-05
Mexico|SIN_CIAD_HJ1385|EPI_ISL_2026411|B.1.1.7|2021-04-05	Mexico	SIN	SIN_CIAD_HJ1385	EPI_ISL_2026411	B.1.1.7	2021-04-05
Mexico|CHH-InDRE_FB13253_S1501|EPI_ISL_1805479|B.1.1.7|2021-04-09	Mexico	CHH	CHH-InDRE_FB13253_S1501	EPI_ISL_1805479	B.1.1.7	2021-04-09
Mexico|CHH-InDRE_FB13252_S1500|EPI_ISL_1805478|B.1.1.7|2021-04-09	Mexico	CHH	CHH-InDRE_FB13252_S1500	EPI_ISL_1805478	B.1.1.7	2021-04-09
Mexico|CHH-InDRE_FB13663_S1733|EPI_ISL_2101872|B.1.1.7|2021-04-13	Mexico	CHH	CHH-InDRE_FB13663_S1733	EPI_ISL_2101872	B.1.1.7	2021-04-13
Mexico|CHH-InDRE_FB13702_S1739|EPI_ISL_2101878|B.1.1.7|2021-04-15	Mexico	CHH	CHH-InDRE_FB13702_S1739	EPI_ISL_2101878	B.1.1.7	2021-04-15
Mexico|CHH-InDRE_FB13678_S1751|EPI_ISL_2101890|B.1.1.7|2021-04-16	Mexico	CHH	CHH-InDRE_FB13678_S1751	EPI_ISL_2101890	B.1.1.7	2021-04-16
Mexico|CHH_LANGEBIO_IMSS_0515|EPI_ISL_2401942|B.1.1.7|2021-04-19	Mexico	CHH	CHH_LANGEBIO_IMSS_0515	EPI_ISL_2401942	B.1.1.7	2021-04-19
Mexico|SIN_CIAD_HJ1490|EPI_ISL_2026413|B.1.1.7|2021-04-19	Mexico	SIN	SIN_CIAD_HJ1490	EPI_ISL_2026413	B.1.1.7	2021-04-19
Mexico|CHH-InDRE_FB13822_S1745|EPI_ISL_2101884|B.1.1.7|2021-04-20	Mexico	CHH	CHH-InDRE_FB13822_S1745	EPI_ISL_2101884	B.1.1.7	2021-04-20
Mexico|SIN_CIAD_HJ1512|EPI_ISL_2026417|B.1.1.7|2021-04-20	Mexico	SIN	SIN_CIAD_HJ1512	EPI_ISL_2026417	B.1.1.7	2021-04-20
Mexico|CHH-InDRE_FB13825_S1746|EPI_ISL_2101885|B.1.1.7|2021-04-21	Mexico	CHH	CHH-InDRE_FB13825_S1746	EPI_ISL_2101885	B.1.1.7	2021-04-21
Mexico|SIN-InDRE_FB14032_S2070|EPI_ISL_2283710|B.1.1.7|2021-04-22	Mexico	SIN	SIN-InDRE_FB14032_S2070	EPI_ISL_2283710	B.1.1.7	2021-04-22
Mexico|QUE-InDRE_FB15604_S2373|EPI_ISL_2455898|B.1.1.7|2021-04-25	Mexico	QUE	QUE-InDRE_FB15604_S2373	EPI_ISL_2455898	B.1.1.7	2021-04-25
Mexico|SON-InDRE_FB14085_S1758|EPI_ISL_2101897|B.1.1.7|2021-04-25	Mexico	SON	SON-InDRE_FB14085_S1758	EPI_ISL_2101897	B.1.1.7	2021-04-25
Mexico|CHH-InDRE_FB14223_S1765|EPI_ISL_2101904|B.1.1.7|2021-04-26	Mexico	CHH	CHH-InDRE_FB14223_S1765	EPI_ISL_2101904	B.1.1.7	2021-04-26
Mexico|JAL-InDRE_FB14278_S1766|EPI_ISL_2101905|B.1.1.7|2021-04-27	Mexico	JAL	JAL-InDRE_FB14278_S1766	EPI_ISL_2101905	B.1.1.7	2021-04-27
Mexico|NLE_LANGEBIO_IMSS_0565|EPI_ISL_2401987|B.1.1.7|2021-04-27	Mexico	NLE	NLE_LANGEBIO_IMSS_0565	EPI_ISL_2401987	B.1.1.7	2021-04-27
Scotland|QEUH-1548E0A|EPI_ISL_2122707|B.1.1.7|2021-04-29	Scotland	QEU	QEUH-1548E0A	EPI_ISL_2122707	B.1.1.7	2021-04-29
Mexico|NLE-LESPNL-20210512-431|EPI_ISL_2102626|B.1.1.7|2021-04-30	Mexico	NLE	NLE-LESPNL-20210512-431	EPI_ISL_2102626	B.1.1.7	2021-04-30
Mexico|CHH-InDRE_FB14915_S2049|EPI_ISL_2283691|B.1.1.7|2021-05-02	Mexico	CHH	CHH-InDRE_FB14915_S2049	EPI_ISL_2283691	B.1.1.7	2021-05-02
Mexico|CHH_INER_IMSS_1042|EPI_ISL_2490312|B.1.1.7|2021-05-02	Mexico	CHH	CHH_INER_IMSS_1042	EPI_ISL_2490312	B.1.1.7	2021-05-02
Mexico|CHH_INER_IMSS_1055|EPI_ISL_2490314|B.1.1.7|2021-05-03	Mexico	CHH	CHH_INER_IMSS_1055	EPI_ISL_2490314	B.1.1.7	2021-05-03
Mexico|SIN_CIAD_ID2302|EPI_ISL_2249234|B.1.1.7|2021-05-03	Mexico	SIN	SIN_CIAD_ID2302	EPI_ISL_2249234	B.1.1.7	2021-05-03
Mexico|CHH_INER_IMSS_1062|EPI_ISL_2490319|B.1.1.7|2021-05-04	Mexico	CHH	CHH_INER_IMSS_1062	EPI_ISL_2490319	B.1.1.7	2021-05-04
Mexico|SIN_CIAD_S6706|EPI_ISL_2249240|B.1.1.7|2021-05-04	Mexico	SIN	SIN_CIAD_S6706	EPI_ISL_2249240	B.1.1.7	2021-05-04
Mexico|CHH-InDRE_FB14909_S2405|EPI_ISL_2455929|B.1.1.7|2021-05-05	Mexico	CHH	CHH-InDRE_FB14909_S2405	EPI_ISL_2455929	B.1.1.7	2021-05-05
Mexico|CHH-InDRE_FB14901_S2402|EPI_ISL_2455927|B.1.1.7|2021-05-05	Mexico	CHH	CHH-InDRE_FB14901_S2402	EPI_ISL_2455927	B.1.1.7	2021-05-05
Mexico|HID-InDRE_FB14798_S2046|EPI_ISL_2283688|B.1.1.7|2021-05-05	Mexico	HID	HID-InDRE_FB14798_S2046	EPI_ISL_2283688	B.1.1.7	2021-05-05
Mexico|CHH-InDRE_FB14879_S2392|EPI_ISL_2455917|B.1.1.7|2021-05-07	Mexico	CHH	CHH-InDRE_FB14879_S2392	EPI_ISL_2455917	B.1.1.7	2021-05-07
Mexico|SIN_CIAD_HJ1616|EPI_ISL_2249254|B.1.1.7|2021-05-10	Mexico	SIN	SIN_CIAD_HJ1616	EPI_ISL_2249254	B.1.1.7	2021-05-10
Mexico|SIN_INER_IMSS_1180|EPI_ISL_2490331|B.1.1.7|2021-05-10	Mexico	SIN	SIN_INER_IMSS_1180	EPI_ISL_2490331	B.1.1.7	2021-05-10
Mexico|CMX-INMEGEN-05-04-64|EPI_ISL_2349930|B.1.1.7|2021-05-12	Mexico	CMX	CMX-INMEGEN-05-04-64	EPI_ISL_2349930	B.1.1.7	2021-05-12
Mexico|MEX-INMEGEN-05-04-61|EPI_ISL_2349927|B.1.1.7|2021-05-12	Mexico	MEX	MEX-INMEGEN-05-04-61	EPI_ISL_2349927	B.1.1.7	2021-05-12
Mexico|CHH-InDRE_FB15895_S2395|EPI_ISL_2455920|B.1.1.7|2021-05-13	Mexico	CHH	CHH-InDRE_FB15895_S2395	EPI_ISL_2455920	B.1.1.7	2021-05-13
Mexico|CHH-LANGEBIO_IMSS_0835|EPI_ISL_2671505|B.1.1.7|2021-05-13	Mexico	CHH	CHH-LANGEBIO_IMSS_0835	EPI_ISL_2671505	B.1.1.7	2021-05-13
Mexico|CHH-LANGEBIO_IMSS_0836|EPI_ISL_2671506|B.1.1.7|2021-05-14	Mexico	CHH	CHH-LANGEBIO_IMSS_0836	EPI_ISL_2671506	B.1.1.7	2021-05-14
Mexico|CHH-LANGEBIO_IMSS_0841|EPI_ISL_2671509|B.1.1.7|2021-05-14	Mexico	CHH	CHH-LANGEBIO_IMSS_0841	EPI_ISL_2671509	B.1.1.7	2021-05-14
Mexico|CHH-LANGEBIO_IMSS_0840|EPI_ISL_2671508|B.1.1.7|2021-05-14	Mexico	CHH	CHH-LANGEBIO_IMSS_0840	EPI_ISL_2671508	B.1.1.7	2021-05-14
Mexico|SIN_CIAD-MZT_ID2430|EPI_ISL_2533913|B.1.1.7|2021-05-15	Mexico	SIN	SIN_CIAD-MZT_ID2430	EPI_ISL_2533913	B.1.1.7	2021-05-15
Mexico|CMX-INMEGEN-05-04-364|EPI_ISL_2350131|B.1.1.7|2021-05-17	Mexico	CMX	CMX-INMEGEN-05-04-364	EPI_ISL_2350131	B.1.1.7	2021-05-17
Mexico|CMX-INMEGEN-05-04-234|EPI_ISL_2350048|B.1.1.7|2021-05-17	Mexico	CMX	CMX-INMEGEN-05-04-234	EPI_ISL_2350048	B.1.1.7	2021-05-17
Mexico|CHH-InDRE_FB16252_S2734|EPI_ISL_2533760|B.1.1.7|2021-05-18	Mexico	CHH	CHH-InDRE_FB16252_S2734	EPI_ISL_2533760	B.1.1.7	2021-05-18
Mexico|CHH-InDRE_FB16251_S2733|EPI_ISL_2533759|B.1.1.7|2021-05-18	Mexico	CHH	CHH-InDRE_FB16251_S2733	EPI_ISL_2533759	B.1.1.7	2021-05-18
Mexico|MEX-LANGEBIO_IMSS_1121|EPI_ISL_2671605|B.1.1.7|2021-05-19	Mexico	MEX	MEX-LANGEBIO_IMSS_1121	EPI_ISL_2671605	B.1.1.7	2021-05-19
Mexico|QUE-InDRE_FB16156_S2437|EPI_ISL_2455961|B.1.1.7|2021-05-19	Mexico	QUE	QUE-InDRE_FB16156_S2437	EPI_ISL_2455961	B.1.1.7	2021-05-19
Mexico|QUE-InDRE_FB16157_S2436|EPI_ISL_2455960|B.1.1.7|2021-05-19	Mexico	QUE	QUE-InDRE_FB16157_S2436	EPI_ISL_2455960	B.1.1.7	2021-05-19
Mexico|CMX-INMEGEN-05-05-232|EPI_ISL_2444538|B.1.1.7|2021-05-20	Mexico	CMX	CMX-INMEGEN-05-05-232	EPI_ISL_2444538	B.1.1.7	2021-05-20
Mexico|MEX-INMEGEN-05-05-200|EPI_ISL_2550752|B.1.1.7|2021-05-20	Mexico	MEX	MEX-INMEGEN-05-05-200	EPI_ISL_2550752	B.1.1.7	2021-05-20
Mexico|CMX-INMEGEN-05-05-97|EPI_ISL_2444461|B.1.1.7|2021-05-21	Mexico	CMX	CMX-INMEGEN-05-05-97	EPI_ISL_2444461	B.1.1.7	2021-05-21
Mexico|CMX-INMEGEN-05-05-19|EPI_ISL_2444411|B.1.1.7|2021-05-22	Mexico	CMX	CMX-INMEGEN-05-05-19	EPI_ISL_2444411	B.1.1.7	2021-05-22
Mexico|JAL-InDRE_FB16739_S2776|EPI_ISL_2533802|B.1.1.7|2021-05-22	Mexico	JAL	JAL-InDRE_FB16739_S2776	EPI_ISL_2533802	B.1.1.7	2021-05-22
Mexico|CMX-INMEGEN-05-05-15|EPI_ISL_2444407|B.1.1.7|2021-05-23	Mexico	CMX	CMX-INMEGEN-05-05-15	EPI_ISL_2444407	B.1.1.7	2021-05-23
Mexico|CHH-InDRE_FB16972_S3127|EPI_ISL_2663394|B.1.1.7|2021-05-25	Mexico	CHH	CHH-InDRE_FB16972_S3127	EPI_ISL_2663394	B.1.1.7	2021-05-25
Mexico|CHH_IBT_IMSS_1434|EPI_ISL_2681103|B.1.1.7|2021-05-26	Mexico	CHH	CHH_IBT_IMSS_1434	EPI_ISL_2681103	B.1.1.7	2021-05-26
Mexico|CMX-INMEGEN-06-02-304|EPI_ISL_2692795|B.1.1.7|2021-05-26	Mexico	CMX	CMX-INMEGEN-06-02-304	EPI_ISL_2692795	B.1.1.7	2021-05-26
Mexico|CMX-INMEGEN-06-02-305|EPI_ISL_2692796|B.1.1.7|2021-05-26	Mexico	CMX	CMX-INMEGEN-06-02-305	EPI_ISL_2692796	B.1.1.7	2021-05-26
Mexico|CMX-INMEGEN-06-02-308|EPI_ISL_2692798|B.1.1.7|2021-05-26	Mexico	CMX	CMX-INMEGEN-06-02-308	EPI_ISL_2692798	B.1.1.7	2021-05-26
Mexico|VER-INMEGEN-05-06-255|EPI_ISL_2603726|B.1.1.7|2021-05-27	Mexico	VER	VER-INMEGEN-05-06-255	EPI_ISL_2603726	B.1.1.7	2021-05-27
Mexico|CMX-INMEGEN-05-06-267|EPI_ISL_2603737|B.1.1.7|2021-05-28	Mexico	CMX	CMX-INMEGEN-05-06-267	EPI_ISL_2603737	B.1.1.7	2021-05-28
Mexico|HID-INMEGEN-05-06-371|EPI_ISL_2603814|B.1.1.7|2021-05-28	Mexico	HID	HID-INMEGEN-05-06-371	EPI_ISL_2603814	B.1.1.7	2021-05-28
Mexico|CMX-INMEGEN-05-06-342|EPI_ISL_2603793|B.1.1.7|2021-05-29	Mexico	CMX	CMX-INMEGEN-05-06-342	EPI_ISL_2603793	B.1.1.7	2021-05-29
Mexico|SIN_CIAD-CLN_D1477|EPI_ISL_2680924|B.1.1.7|2021-05-30	Mexico	SIN	SIN_CIAD-CLN_D1477	EPI_ISL_2680924	B.1.1.7	2021-05-30
Mexico|SIN_CIAD-CLN_D1476|EPI_ISL_2680923|B.1.1.7|2021-05-30	Mexico	SIN	SIN_CIAD-CLN_D1476	EPI_ISL_2680923	B.1.1.7	2021-05-30
Mexico|SON-InDRE_FB17175_S3088|EPI_ISL_2663355|B.1.1.7|2021-05-30	Mexico	SON	SON-InDRE_FB17175_S3088	EPI_ISL_2663355	B.1.1.7	2021-05-30
Mexico|SON-IBT_IMSS_1840|EPI_ISL_2801715|B.1.1.7|2021-05-30	Mexico	SON	SON-IBT_IMSS_1840	EPI_ISL_2801715	B.1.1.7	2021-05-30
Mexico|SIN_CIAD-CLN_D1511|EPI_ISL_2680927|B.1.1.7|2021-05-31	Mexico	SIN	SIN_CIAD-CLN_D1511	EPI_ISL_2680927	B.1.1.7	2021-05-31
Mexico|SIN-InDRE_FB16917_S3067|EPI_ISL_2663333|B.1.1.7|2021-05-31	Mexico	SIN	SIN-InDRE_FB16917_S3067	EPI_ISL_2663333	B.1.1.7	2021-05-31
Mexico|SIN_CIAD-CLN_D0035|EPI_ISL_2680920|B.1.1.7|2021-06-01	Mexico	SIN	SIN_CIAD-CLN_D0035	EPI_ISL_2680920	B.1.1.7	2021-06-01
Mexico|CHH_IBT_IMSS_1430|EPI_ISL_2681289|B.1.1.7|2021-06-02	Mexico	CHH	CHH_IBT_IMSS_1430	EPI_ISL_2681289	B.1.1.7	2021-06-02
Mexico|SIN-InDRE_FB16918_S3068|EPI_ISL_2663334|B.1.1.7|2021-06-02	Mexico	SIN	SIN-InDRE_FB16918_S3068	EPI_ISL_2663334	B.1.1.7	2021-06-02
Mexico|GUA-InDRE_FB16908_S3120|EPI_ISL_2663387|B.1.1.7|2021-06-03	Mexico	GUA	GUA-InDRE_FB16908_S3120	EPI_ISL_2663387	B.1.1.7	2021-06-03
Mexico|SIN-CIAD-CLN_D0174|EPI_ISL_2987687|B.1.1.7|2021-06-03	Mexico	SIN	SIN-CIAD-CLN_D0174	EPI_ISL_2987687	B.1.1.7	2021-06-03
Mexico|SON_CIAD-HMO_2555|EPI_ISL_2894566|B.1.1.7|2021-06-04	Mexico	SON	SON_CIAD-HMO_2555	EPI_ISL_2894566	B.1.1.7	2021-06-04
Mexico|CMX-INMEGEN-06-03-150|EPI_ISL_2810140|B.1.1.7|2021-06-05	Mexico	CMX	CMX-INMEGEN-06-03-150	EPI_ISL_2810140	B.1.1.7	2021-06-05
Mexico|CHH-IBT_IMSS_1813|EPI_ISL_2801692|B.1.1.7|2021-06-08	Mexico	CHH	CHH-IBT_IMSS_1813	EPI_ISL_2801692	B.1.1.7	2021-06-08
Mexico|SIN-InDRE_FB17473_S3490|EPI_ISL_2779005|B.1.1.7|2021-06-08	Mexico	SIN	SIN-InDRE_FB17473_S3490	EPI_ISL_2779005	B.1.1.7	2021-06-08
Mexico|SIN-InDRE_FB17478_S3492|EPI_ISL_2779007|B.1.1.7|2021-06-08	Mexico	SIN	SIN-InDRE_FB17478_S3492	EPI_ISL_2779007	B.1.1.7	2021-06-08
Mexico|DUR-InDRE_FB17382_S3479|EPI_ISL_2778994|B.1.1.7|2021-06-09	Mexico	DUR	DUR-InDRE_FB17382_S3479	EPI_ISL_2778994	B.1.1.7	2021-06-09
Mexico|NAY-InDRE_FB17385_S3480|EPI_ISL_2778995|B.1.1.7|2021-06-09	Mexico	NAY	NAY-InDRE_FB17385_S3480	EPI_ISL_2778995	B.1.1.7	2021-06-09
Mexico|SIN-InDRE_FB17388_S3483|EPI_ISL_2778998|B.1.1.7|2021-06-09	Mexico	SIN	SIN-InDRE_FB17388_S3483	EPI_ISL_2778998	B.1.1.7	2021-06-09
Mexico|CHH-InDRE_FB17410_S3926|EPI_ISL_2858940|B.1.1.7|2021-06-11	Mexico	CHH	CHH-InDRE_FB17410_S3926	EPI_ISL_2858940	B.1.1.7	2021-06-11
Mexico|SIN-CIAD-MZT_S7079|EPI_ISL_2987713|B.1.1.7|2021-06-11	Mexico	SIN	SIN-CIAD-MZT_S7079	EPI_ISL_2987713	B.1.1.7	2021-06-11
Mexico|SIN_CIAD-CLN_D0511|EPI_ISL_2927967|B.1.1.7|2021-06-11	Mexico	SIN	SIN_CIAD-CLN_D0511	EPI_ISL_2927967	B.1.1.7	2021-06-11
Mexico|SON_CIAD-HMO_2613|EPI_ISL_2894569|B.1.1.7|2021-06-11	Mexico	SON	SON_CIAD-HMO_2613	EPI_ISL_2894569	B.1.1.7	2021-06-11
Mexico|SIN-CIAD-MZT_S7103|EPI_ISL_2987717|B.1.1.7|2021-06-14	Mexico	SIN	SIN-CIAD-MZT_S7103	EPI_ISL_2987717	B.1.1.7	2021-06-14
Mexico|SIN-CIAD-MZT_S7104|EPI_ISL_2987718|B.1.1.7|2021-06-14	Mexico	SIN	SIN-CIAD-MZT_S7104	EPI_ISL_2987718	B.1.1.7	2021-06-14
Mexico|SON_CIAD-HMO_16011|EPI_ISL_2927980|B.1.1.7|2021-06-15	Mexico	SON	SON_CIAD-HMO_16011	EPI_ISL_2927980	B.1.1.7	2021-06-15
Mexico|SON_CIAD-HMO_16010|EPI_ISL_2927979|B.1.1.7|2021-06-15	Mexico	SON	SON_CIAD-HMO_16010	EPI_ISL_2927979	B.1.1.7	2021-06-15
Mexico|SON-InDRE_FB18023_S3947|EPI_ISL_2858961|B.1.1.7|2021-06-15	Mexico	SON	SON-InDRE_FB18023_S3947	EPI_ISL_2858961	B.1.1.7	2021-06-15
Mexico|SON-InDRE_FB18293_S3968|EPI_ISL_2858982|B.1.1.7|2021-06-17	Mexico	SON	SON-InDRE_FB18293_S3968	EPI_ISL_2858982	B.1.1.7	2021-06-17
Mexico|OAX-InDRE_FB18623_S4153|EPI_ISL_2920724|B.1.1.7|2021-06-19	Mexico	OAX	OAX-InDRE_FB18623_S4153	EPI_ISL_2920724	B.1.1.7	2021-06-19
Mexico|SIN_CIAD-CLN_S0600|EPI_ISL_2927971|B.1.1.7|2021-06-21	Mexico	SIN	SIN_CIAD-CLN_S0600	EPI_ISL_2927971	B.1.1.7	2021-06-21
Mexico|SIN_CIAD-MZT_S7158|EPI_ISL_2927974|B.1.1.7|2021-06-22	Mexico	SIN	SIN_CIAD-MZT_S7158	EPI_ISL_2927974	B.1.1.7	2021-06-22
Mexico|SIN-LANGEBIO_IMSS_1291|EPI_ISL_2942444|B.1.1.7|2021-06-22	Mexico	SIN	SIN-LANGEBIO_IMSS_1291	EPI_ISL_2942444	B.1.1.7	2021-06-22
Mexico|SIN-LANGEBIO_IMSS_1305|EPI_ISL_2942455|B.1.1.7|2021-06-22	Mexico	SIN	SIN-LANGEBIO_IMSS_1305	EPI_ISL_2942455	B.1.1.7	2021-06-22
Mexico|CMX-InDRE_FD77651_S4136|EPI_ISL_2920707|B.1.1.7|2021-06-23	Mexico	CMX	CMX-InDRE_FD77651_S4136	EPI_ISL_2920707	B.1.1.7	2021-06-23
Mexico|CMX-INMEGEN-06-03-189|EPI_ISL_2842783|B.1.1.7|2021-06-23	Mexico	CMX	CMX-INMEGEN-06-03-189	EPI_ISL_2842783	B.1.1.7	2021-06-23
Mexico|CMX-InDRE_FD77861_S4138|EPI_ISL_2920709|B.1.1.7|2021-06-25	Mexico	CMX	CMX-InDRE_FD77861_S4138	EPI_ISL_2920709	B.1.1.7	2021-06-25
Mexico|SIN-InDRE_FB19380_S4506|EPI_ISL_3033360|B.1.1.7|2021-06-26	Mexico	SIN	SIN-InDRE_FB19380_S4506	EPI_ISL_3033360	B.1.1.7	2021-06-26
Mexico|ROO-LANGEBIO_IMSS_1578|EPI_ISL_2942689|B.1.1.7|2021-06-27	Mexico	ROO	ROO-LANGEBIO_IMSS_1578	EPI_ISL_2942689	B.1.1.7	2021-06-27
Mexico|SON-H-3296|EPI_ISL_2894601|B.1.1.7|2021-06-30	Mexico	SON	SON-H-3296	EPI_ISL_2894601	B.1.1.7	2021-06-30
Mexico|NAY-CIAD-4795-0715|EPI_ISL_3149316|B.1.1.7|2021-07-15	Mexico	NAY	NAY-CIAD-4795-0715	EPI_ISL_3149316	B.1.1.7	2021-07-15

## Sheet: B_1_1_7_C3a
Name	Country	State	ID	GSAID	Lineage	Date
Mexico|YUC-NYGC-14715-21|EPI_ISL_3024078|B.1.1.7|2021-03-02	Mexico	YUC	YUC-NYGC-14715-21	EPI_ISL_3024078	B.1.1.7	2021-03-02
Mexico|CMX-InDRE_FD63747_S2064|EPI_ISL_2283704|B.1.1.7|2021-03-11	Mexico	CMX	CMX-InDRE_FD63747_S2064	EPI_ISL_2283704	B.1.1.7	2021-03-11
USA|IL-CDC-QDX22905187|EPI_ISL_1480775|B.1.1.7|2021-03-11	USA	Other	IL-CDC-QDX22905187	EPI_ISL_1480775	B.1.1.7	2021-03-11
Mexico|YUC-InDRE_FB15125_S2056|EPI_ISL_2283698|B.1.1.7|2021-03-19	Mexico	YUC	YUC-InDRE_FB15125_S2056	EPI_ISL_2283698	B.1.1.7	2021-03-19
Mexico|CMX-InDRE_F34543_S900|EPI_ISL_1423510|B.1.1.7|2021-03-21	Mexico	CMX	CMX-InDRE_F34543_S900	EPI_ISL_1423510	B.1.1.7	2021-03-21
USA|NJ-CDC-ASC210014414|EPI_ISL_1551392|B.1.1.7|2021-03-21	USA	Other	NJ-CDC-ASC210014414	EPI_ISL_1551392	B.1.1.7	2021-03-21
Mexico|YUC-InDRE_F12194_S1195|EPI_ISL_1626802|B.1.1.7|2021-03-22	Mexico	YUC	YUC-InDRE_F12194_S1195	EPI_ISL_1626802	B.1.1.7	2021-03-22
USA|CT-JAX-JAX000761|EPI_ISL_1540823|B.1.1.7|2021-03-31	USA	Other	CT-JAX-JAX000761	EPI_ISL_1540823	B.1.1.7	2021-03-31
Mexico|NLE-InDRE_FB14848_S2085|EPI_ISL_2283724|B.1.1.7|2021-04-05	Mexico	NLE	NLE-InDRE_FB14848_S2085	EPI_ISL_2283724	B.1.1.7	2021-04-05
Mexico|HID-InDRE_FB13039_S1505|EPI_ISL_1805483|B.1.1.7|2021-04-06	Mexico	HID	HID-InDRE_FB13039_S1505	EPI_ISL_1805483	B.1.1.7	2021-04-06
USA|CT-JAX-JAX000822|EPI_ISL_1625554|B.1.1.7|2021-04-06	USA	Other	CT-JAX-JAX000822	EPI_ISL_1625554	B.1.1.7	2021-04-06
Mexico|ROO-InDRE_FB13273_S1503|EPI_ISL_1805481|B.1.1.7|2021-04-06	Mexico	ROO	ROO-InDRE_FB13273_S1503	EPI_ISL_1805481	B.1.1.7	2021-04-06
Mexico|MIC-InDRE_FB14989_S2053|EPI_ISL_2283695|B.1.1.7|2021-04-07	Mexico	MIC	MIC-InDRE_FB14989_S2053	EPI_ISL_2283695	B.1.1.7	2021-04-07
USA|CT-CDC-ASC210050408|EPI_ISL_1900340|B.1.1.7|2021-04-07	USA	Other	CT-CDC-ASC210050408	EPI_ISL_1900340	B.1.1.7	2021-04-07
Mexico|NLE_INER_IMSS_00735|EPI_ISL_2091191|B.1.1.7|2021-04-08	Mexico	NLE	NLE_INER_IMSS_00735	EPI_ISL_2091191	B.1.1.7	2021-04-08
Mexico|QUE_IBT_IMSS_97648-NC|EPI_ISL_3091083|B.1.1.7|2021-04-08	Mexico	QUE	QUE_IBT_IMSS_97648-NC	EPI_ISL_3091083	B.1.1.7	2021-04-08
Mexico|COA-InDRE_FB13031_S1493|EPI_ISL_1805471|B.1.1.7|2021-04-09	Mexico	COA	COA-InDRE_FB13031_S1493	EPI_ISL_1805471	B.1.1.7	2021-04-09
Germany|NW-RKI-I-079953|EPI_ISL_1644663|B.1.1.7|2021-04-10	Germany	Other	NW-RKI-I-079953	EPI_ISL_1644663	B.1.1.7	2021-04-10
Mexico|TAB_IBT_IMSS_1351|EPI_ISL_2391728|B.1.1.7|2021-04-12	Mexico	TAB	TAB_IBT_IMSS_1351	EPI_ISL_2391728	B.1.1.7	2021-04-12
Mexico|CHH-InDRE_FB13662_S1732|EPI_ISL_2101871|B.1.1.7|2021-04-13	Mexico	CHH	CHH-InDRE_FB13662_S1732	EPI_ISL_2101871	B.1.1.7	2021-04-13
USA|MA-CDCBI-CRSP_CIBITM763WO2O4YE|EPI_ISL_1743873|B.1.1.7|2021-04-14	USA	MA-	MA-CDCBI-CRSP_CIBITM763WO2O4YE	EPI_ISL_1743873	B.1.1.7	2021-04-14
Mexico|CMX-INMEGEN-04-05-72|EPI_ISL_1711299|B.1.1.7|2021-04-15	Mexico	CMX	CMX-INMEGEN-04-05-72	EPI_ISL_1711299	B.1.1.7	2021-04-15
Mexico|CMX-INMEGEN-04-05-71|EPI_ISL_1711302|B.1.1.7|2021-04-15	Mexico	CMX	CMX-INMEGEN-04-05-71	EPI_ISL_1711302	B.1.1.7	2021-04-15
Mexico|SIN_CIAD_S6572|EPI_ISL_2026422|B.1.1.7|2021-04-15	Mexico	SIN	SIN_CIAD_S6572	EPI_ISL_2026422	B.1.1.7	2021-04-15
USA|NY-PRL-2021_0419_00E15|EPI_ISL_1717172|B.1.1.7|2021-04-16	USA	Other	NY-PRL-2021_0419_00E15	EPI_ISL_1717172	B.1.1.7	2021-04-16
Mexico|COA_LANGEBIO_IMSS_0595|EPI_ISL_2402014|B.1.1.7|2021-04-17	Mexico	COA	COA_LANGEBIO_IMSS_0595	EPI_ISL_2402014	B.1.1.7	2021-04-17
Mexico|NLE_INER_IMSS_00768|EPI_ISL_2091222|B.1.1.7|2021-04-17	Mexico	NLE	NLE_INER_IMSS_00768	EPI_ISL_2091222	B.1.1.7	2021-04-17
Mexico|ROO-InDRE_FB13727_S1740|EPI_ISL_2101879|B.1.1.7|2021-04-17	Mexico	ROO	ROO-InDRE_FB13727_S1740	EPI_ISL_2101879	B.1.1.7	2021-04-17
Mexico|CMX-INMEGEN-04-06-73|EPI_ISL_1807363|B.1.1.7|2021-04-19	Mexico	CMX	CMX-INMEGEN-04-06-73	EPI_ISL_1807363	B.1.1.7	2021-04-19
Mexico|GUA-InDRE_FB13877_S2078|EPI_ISL_2283718|B.1.1.7|2021-04-19	Mexico	GUA	GUA-InDRE_FB13877_S2078	EPI_ISL_2283718	B.1.1.7	2021-04-19
Mexico|HID-InDRE_FB13996_S2048|EPI_ISL_2283690|B.1.1.7|2021-04-19	Mexico	HID	HID-InDRE_FB13996_S2048	EPI_ISL_2283690	B.1.1.7	2021-04-19
USA|IL-S21WGS1060|EPI_ISL_1825856|B.1.1.7|2021-04-19	USA	Other	IL-S21WGS1060	EPI_ISL_1825856	B.1.1.7	2021-04-19
Mexico|GUA-InDRE_FB13904_S2077|EPI_ISL_2283717|B.1.1.7|2021-04-20	Mexico	GUA	GUA-InDRE_FB13904_S2077	EPI_ISL_2283717	B.1.1.7	2021-04-20
Mexico|GUA-InDRE_FB13881_S1754|EPI_ISL_2101893|B.1.1.7|2021-04-20	Mexico	GUA	GUA-InDRE_FB13881_S1754	EPI_ISL_2101893	B.1.1.7	2021-04-20
Mexico|CHH-InDRE_FB13819_S1743|EPI_ISL_2101882|B.1.1.7|2021-04-21	Mexico	CHH	CHH-InDRE_FB13819_S1743	EPI_ISL_2101882	B.1.1.7	2021-04-21
Mexico|JAL-InDRE_FB13972_S1752|EPI_ISL_2101891|B.1.1.7|2021-04-21	Mexico	JAL	JAL-InDRE_FB13972_S1752	EPI_ISL_2101891	B.1.1.7	2021-04-21
USA|CT-Yale-4253|EPI_ISL_2020731|B.1.1.7|2021-04-21	USA	Other	CT-Yale-4253	EPI_ISL_2020731	B.1.1.7	2021-04-21
USA|NJ-CDC-ASC210030312|EPI_ISL_2090283|B.1.1.7|2021-04-22	USA	Other	NJ-CDC-ASC210030312	EPI_ISL_2090283	B.1.1.7	2021-04-22
Mexico|QUE-InDRE_FB15562_S2372|EPI_ISL_2455897|B.1.1.7|2021-04-22	Mexico	QUE	QUE-InDRE_FB15562_S2372	EPI_ISL_2455897	B.1.1.7	2021-04-22
Mexico|SIN_CIAD_S6625|EPI_ISL_2026420|B.1.1.7|2021-04-22	Mexico	SIN	SIN_CIAD_S6625	EPI_ISL_2026420	B.1.1.7	2021-04-22
USA|WA-Altius-ALTCOV-RVY5RKD4ABRHFEXT|EPI_ISL_2473598|B.1.1.7|2021-04-23	USA	Other	WA-Altius-ALTCOV-RVY5RKD4ABRHFEXT	EPI_ISL_2473598	B.1.1.7	2021-04-23
Mexico|CAM_LANGEBIO_IMSS_08144-NC|EPI_ISL_2969870|B.1.1.7|2021-04-26	Mexico	CAM	CAM_LANGEBIO_IMSS_08144-NC	EPI_ISL_2969870	B.1.1.7	2021-04-26
Mexico|CMX-INMEGEN-04-07-230|EPI_ISL_2080647|B.1.1.7|2021-04-26	Mexico	CMX	CMX-INMEGEN-04-07-230	EPI_ISL_2080647	B.1.1.7	2021-04-26
Mexico|JAL-InDRE_FB14113_S1761|EPI_ISL_2101900|B.1.1.7|2021-04-26	Mexico	JAL	JAL-InDRE_FB14113_S1761	EPI_ISL_2101900	B.1.1.7	2021-04-26
Mexico|SIN_CIAD_S6643|EPI_ISL_2026418|B.1.1.7|2021-04-26	Mexico	SIN	SIN_CIAD_S6643	EPI_ISL_2026418	B.1.1.7	2021-04-26
Mexico|NLE_LANGEBIO_IMSS_0555|EPI_ISL_2401978|B.1.1.7|2021-04-27	Mexico	NLE	NLE_LANGEBIO_IMSS_0555	EPI_ISL_2401978	B.1.1.7	2021-04-27
Mexico|QUE-InDRE_FB15659_S2376|EPI_ISL_2455901|B.1.1.7|2021-04-27	Mexico	QUE	QUE-InDRE_FB15659_S2376	EPI_ISL_2455901	B.1.1.7	2021-04-27
Mexico|QUE-InDRE_FB15667_S2377|EPI_ISL_2455902|B.1.1.7|2021-04-27	Mexico	QUE	QUE-InDRE_FB15667_S2377	EPI_ISL_2455902	B.1.1.7	2021-04-27
Mexico|VER_IBT_IMSS_1333|EPI_ISL_2391694|B.1.1.7|2021-04-27	Mexico	VER	VER_IBT_IMSS_1333	EPI_ISL_2391694	B.1.1.7	2021-04-27
Mexico|COA_LANGEBIO_IMSS_0575|EPI_ISL_2401995|B.1.1.7|2021-04-28	Mexico	COA	COA_LANGEBIO_IMSS_0575	EPI_ISL_2401995	B.1.1.7	2021-04-28
USA|NY-Wadsworth-21052667-01|EPI_ISL_2274618|B.1.1.7|2021-04-28	USA	Other	NY-Wadsworth-21052667-01	EPI_ISL_2274618	B.1.1.7	2021-04-28
Mexico|SIN_CIAD_S6662|EPI_ISL_2249230|B.1.1.7|2021-04-28	Mexico	SIN	SIN_CIAD_S6662	EPI_ISL_2249230	B.1.1.7	2021-04-28
Mexico|CAM_INER_IMSS_1117|EPI_ISL_2490327|B.1.1.7|2021-04-29	Mexico	CAM	CAM_INER_IMSS_1117	EPI_ISL_2490327	B.1.1.7	2021-04-29
Mexico|VER_IBT_IMSS_1214|EPI_ISL_2391651|B.1.1.7|2021-04-29	Mexico	VER	VER_IBT_IMSS_1214	EPI_ISL_2391651	B.1.1.7	2021-04-29
Mexico|HID-INMEGEN-05-02-154|EPI_ISL_2230876|B.1.1.7|2021-04-30	Mexico	HID	HID-INMEGEN-05-02-154	EPI_ISL_2230876	B.1.1.7	2021-04-30
Mexico|QUE-InDRE_FB15699_S2378|EPI_ISL_2455903|B.1.1.7|2021-04-30	Mexico	QUE	QUE-InDRE_FB15699_S2378	EPI_ISL_2455903	B.1.1.7	2021-04-30
Mexico|SIN-InDRE_FB15074_S2060|EPI_ISL_2283702|B.1.1.7|2021-04-30	Mexico	SIN	SIN-InDRE_FB15074_S2060	EPI_ISL_2283702	B.1.1.7	2021-04-30
USA|MA-CDCBI-CRSP_7E4Z47Q26KONERWB|EPI_ISL_2096308|B.1.1.7|2021-05-01	USA	MA-	MA-CDCBI-CRSP_7E4Z47Q26KONERWB	EPI_ISL_2096308	B.1.1.7	2021-05-01
Mexico|MEX-INMEGEN-05-01-314|EPI_ISL_2105822|B.1.1.7|2021-05-01	Mexico	MEX	MEX-INMEGEN-05-01-314	EPI_ISL_2105822	B.1.1.7	2021-05-01
Mexico|HID-INMEGEN-05-02-171|EPI_ISL_2230878|B.1.1.7|2021-05-02	Mexico	HID	HID-INMEGEN-05-02-171	EPI_ISL_2230878	B.1.1.7	2021-05-02
Mexico|MEX-INMEGEN-05-02-175|EPI_ISL_2230825|B.1.1.7|2021-05-02	Mexico	MEX	MEX-INMEGEN-05-02-175	EPI_ISL_2230825	B.1.1.7	2021-05-02
Mexico|MEX-INMEGEN-05-02-166|EPI_ISL_2230877|B.1.1.7|2021-05-02	Mexico	MEX	MEX-INMEGEN-05-02-166	EPI_ISL_2230877	B.1.1.7	2021-05-02
Mexico|CMX-INMEGEN-05-01-42|EPI_ISL_2230892|B.1.1.7|2021-05-03	Mexico	CMX	CMX-INMEGEN-05-01-42	EPI_ISL_2230892	B.1.1.7	2021-05-03
Mexico|SIN_CIAD_S6699|EPI_ISL_2277642|B.1.1.7|2021-05-03	Mexico	SIN	SIN_CIAD_S6699	EPI_ISL_2277642	B.1.1.7	2021-05-03
Mexico|SIN_CIAD_S6698|EPI_ISL_2249236|B.1.1.7|2021-05-03	Mexico	SIN	SIN_CIAD_S6698	EPI_ISL_2249236	B.1.1.7	2021-05-03
Mexico|SIN-InDRE_FB15071_S2059|EPI_ISL_2283701|B.1.1.7|2021-05-03	Mexico	SIN	SIN-InDRE_FB15071_S2059	EPI_ISL_2283701	B.1.1.7	2021-05-03
Mexico|CMX-INMEGEN-05-01-74|EPI_ISL_2277643|B.1.1.7|2021-05-04	Mexico	CMX	CMX-INMEGEN-05-01-74	EPI_ISL_2277643	B.1.1.7	2021-05-04
Mexico|QUE-InDRE_FB15757_S2381|EPI_ISL_2455906|B.1.1.7|2021-05-04	Mexico	QUE	QUE-InDRE_FB15757_S2381	EPI_ISL_2455906	B.1.1.7	2021-05-04
Mexico|SIN_CIAD_HJ1592|EPI_ISL_2249239|B.1.1.7|2021-05-04	Mexico	SIN	SIN_CIAD_HJ1592	EPI_ISL_2249239	B.1.1.7	2021-05-04
Mexico|CAM-InDRE_FB14886_S2047|EPI_ISL_2283689|B.1.1.7|2021-05-05	Mexico	CAM	CAM-InDRE_FB14886_S2047	EPI_ISL_2283689	B.1.1.7	2021-05-05
Mexico|CMX-INMEGEN-05-02-35|EPI_ISL_2230869|B.1.1.7|2021-05-05	Mexico	CMX	CMX-INMEGEN-05-02-35	EPI_ISL_2230869	B.1.1.7	2021-05-05
Mexico|MEX-INMEGEN-05-02-24|EPI_ISL_2230867|B.1.1.7|2021-05-05	Mexico	MEX	MEX-INMEGEN-05-02-24	EPI_ISL_2230867	B.1.1.7	2021-05-05
Mexico|MEX-INMEGEN-05-03-287|EPI_ISL_2319383|B.1.1.7|2021-05-05	Mexico	MEX	MEX-INMEGEN-05-03-287	EPI_ISL_2319383	B.1.1.7	2021-05-05
Mexico|MEX-INMEGEN-05-03-300|EPI_ISL_2881779|B.1.1.7|2021-05-05	Mexico	MEX	MEX-INMEGEN-05-03-300	EPI_ISL_2881779	B.1.1.7	2021-05-05
Mexico|QUE-InDRE_FB15774_S2382|EPI_ISL_2455907|B.1.1.7|2021-05-05	Mexico	QUE	QUE-InDRE_FB15774_S2382	EPI_ISL_2455907	B.1.1.7	2021-05-05
Mexico|YUC-NYGC-1211-SM|EPI_ISL_3023983|B.1.1.7|2021-05-05	Mexico	YUC	YUC-NYGC-1211-SM	EPI_ISL_3023983	B.1.1.7	2021-05-05
Mexico|YUC-NYGC-1232-SM|EPI_ISL_3023948|B.1.1.7|2021-05-05	Mexico	YUC	YUC-NYGC-1232-SM	EPI_ISL_3023948	B.1.1.7	2021-05-05
Mexico|CMX-INMEGEN-05-03-3|EPI_ISL_2319173|B.1.1.7|2021-05-06	Mexico	CMX	CMX-INMEGEN-05-03-3	EPI_ISL_2319173	B.1.1.7	2021-05-06
Mexico|GUA-InDRE_FB14832_S3059|EPI_ISL_2663326|B.1.1.7|2021-05-06	Mexico	GUA	GUA-InDRE_FB14832_S3059	EPI_ISL_2663326	B.1.1.7	2021-05-06
Mexico|MEX-INMEGEN-05-03-360|EPI_ISL_2319411|B.1.1.7|2021-05-06	Mexico	MEX	MEX-INMEGEN-05-03-360	EPI_ISL_2319411	B.1.1.7	2021-05-06
Mexico|ROO_INER_IMSS_1152|EPI_ISL_2490330|B.1.1.7|2021-05-06	Mexico	ROO	ROO_INER_IMSS_1152	EPI_ISL_2490330	B.1.1.7	2021-05-06
Mexico|SIN_CIAD_S6741|EPI_ISL_2249251|B.1.1.7|2021-05-07	Mexico	SIN	SIN_CIAD_S6741	EPI_ISL_2249251	B.1.1.7	2021-05-07
USA|CT-CDC-QDX24941255|EPI_ISL_2372257|B.1.1.7|2021-05-10	USA	Other	CT-CDC-QDX24941255	EPI_ISL_2372257	B.1.1.7	2021-05-10
Mexico|CMX-INMEGEN-05-04-18|EPI_ISL_2349896|B.1.1.7|2021-05-11	Mexico	CMX	CMX-INMEGEN-05-04-18	EPI_ISL_2349896	B.1.1.7	2021-05-11
Mexico|HID-INMEGEN-05-04-25|EPI_ISL_2349903|B.1.1.7|2021-05-11	Mexico	HID	HID-INMEGEN-05-04-25	EPI_ISL_2349903	B.1.1.7	2021-05-11
Mexico|CMX-INMEGEN-05-04-40|EPI_ISL_2349916|B.1.1.7|2021-05-12	Mexico	CMX	CMX-INMEGEN-05-04-40	EPI_ISL_2349916	B.1.1.7	2021-05-12
Mexico|CMX-INMEGEN-INDRE-05-03-249|EPI_ISL_2319359|B.1.1.7|2021-05-12	Mexico	CMX	CMX-INMEGEN-INDRE-05-03-249	EPI_ISL_2319359	B.1.1.7	2021-05-12
Mexico|CMX-INMEGEN-05-04-80|EPI_ISL_2349943|B.1.1.7|2021-05-12	Mexico	CMX	CMX-INMEGEN-05-04-80	EPI_ISL_2349943	B.1.1.7	2021-05-12
Mexico|HID-INMEGEN-05-04-37|EPI_ISL_2349913|B.1.1.7|2021-05-12	Mexico	HID	HID-INMEGEN-05-04-37	EPI_ISL_2349913	B.1.1.7	2021-05-12
Mexico|MEX-INMEGEN-05-04-36|EPI_ISL_2349912|B.1.1.7|2021-05-12	Mexico	MEX	MEX-INMEGEN-05-04-36	EPI_ISL_2349912	B.1.1.7	2021-05-12
Mexico|MEX-INMEGEN-05-04-85|EPI_ISL_2349947|B.1.1.7|2021-05-12	Mexico	MEX	MEX-INMEGEN-05-04-85	EPI_ISL_2349947	B.1.1.7	2021-05-12
Mexico|ZAC_INER_IMSS_1230|EPI_ISL_2490333|B.1.1.7|2021-05-12	Mexico	ZAC	ZAC_INER_IMSS_1230	EPI_ISL_2490333	B.1.1.7	2021-05-12
Mexico|MEX-INMEGEN-05-04-103|EPI_ISL_2349960|B.1.1.7|2021-05-13	Mexico	MEX	MEX-INMEGEN-05-04-103	EPI_ISL_2349960	B.1.1.7	2021-05-13
USA|FL-CDC-STM-000073733|EPI_ISL_2440457|B.1.1.7|2021-05-13	USA	Other	FL-CDC-STM-000073733	EPI_ISL_2440457	B.1.1.7	2021-05-13
Mexico|QUE-InDRE_FB15807_S2386|EPI_ISL_2455911|B.1.1.7|2021-05-13	Mexico	QUE	QUE-InDRE_FB15807_S2386	EPI_ISL_2455911	B.1.1.7	2021-05-13
Mexico|CMX-INMEGEN-05-04-179|EPI_ISL_2350010|B.1.1.7|2021-05-14	Mexico	CMX	CMX-INMEGEN-05-04-179	EPI_ISL_2350010	B.1.1.7	2021-05-14
Mexico|MEX-InDRE_FD68596_S2471|EPI_ISL_2455992|B.1.1.7|2021-05-14	Mexico	MEX	MEX-InDRE_FD68596_S2471	EPI_ISL_2455992	B.1.1.7	2021-05-14
Mexico|MEX-INMEGEN-05-04-165|EPI_ISL_2350000|B.1.1.7|2021-05-15	Mexico	MEX	MEX-INMEGEN-05-04-165	EPI_ISL_2350000	B.1.1.7	2021-05-15
Mexico|MEX-INMEGEN-05-04-214|EPI_ISL_2350034|B.1.1.7|2021-05-15	Mexico	MEX	MEX-INMEGEN-05-04-214	EPI_ISL_2350034	B.1.1.7	2021-05-15
USA|CT-CDC-ASC210063992|EPI_ISL_2280664|B.1.1.7|2021-05-15	USA	Other	CT-CDC-ASC210063992	EPI_ISL_2280664	B.1.1.7	2021-05-15
Mexico|GUA-LANGEBIO_IMSS_1003|EPI_ISL_2671565|B.1.1.7|2021-05-17	Mexico	GUA	GUA-LANGEBIO_IMSS_1003	EPI_ISL_2671565	B.1.1.7	2021-05-17
Mexico|GUA-LANGEBIO_IMSS_1001|EPI_ISL_2671564|B.1.1.7|2021-05-17	Mexico	GUA	GUA-LANGEBIO_IMSS_1001	EPI_ISL_2671564	B.1.1.7	2021-05-17
Mexico|QUE-InDRE_FB16146_S2439|EPI_ISL_2455963|B.1.1.7|2021-05-17	Mexico	QUE	QUE-InDRE_FB16146_S2439	EPI_ISL_2455963	B.1.1.7	2021-05-17
Mexico|QUE-InDRE_FB16164_S2460|EPI_ISL_2455981|B.1.1.7|2021-05-17	Mexico	QUE	QUE-InDRE_FB16164_S2460	EPI_ISL_2455981	B.1.1.7	2021-05-17
Mexico|TAM-InDRE_FB16034_S2433|EPI_ISL_2455957|B.1.1.7|2021-05-17	Mexico	TAM	TAM-InDRE_FB16034_S2433	EPI_ISL_2455957	B.1.1.7	2021-05-17
Mexico|TAM-InDRE_FB16029_S2428|EPI_ISL_2455952|B.1.1.7|2021-05-17	Mexico	TAM	TAM-InDRE_FB16029_S2428	EPI_ISL_2455952	B.1.1.7	2021-05-17
Mexico|YUC-InDRE_FB16578_S2746|EPI_ISL_2533772|B.1.1.7|2021-05-17	Mexico	YUC	YUC-InDRE_FB16578_S2746	EPI_ISL_2533772	B.1.1.7	2021-05-17
Mexico|CMX-INER-INMEGEN-00227|EPI_ISL_2646128|B.1.1.7|2021-05-18	Mexico	CMX	CMX-INER-INMEGEN-00227	EPI_ISL_2646128	B.1.1.7	2021-05-18
Mexico|GUA-InDRE_FB16216_S2466|EPI_ISL_2455987|B.1.1.7|2021-05-18	Mexico	GUA	GUA-InDRE_FB16216_S2466	EPI_ISL_2455987	B.1.1.7	2021-05-18
Mexico|ROO-LANGEBIO_IMSS_0900|EPI_ISL_2671655|B.1.1.7|2021-05-18	Mexico	ROO	ROO-LANGEBIO_IMSS_0900	EPI_ISL_2671655	B.1.1.7	2021-05-18
Mexico|VER-LANGEBIO_IMSS_1103|EPI_ISL_2671737|B.1.1.7|2021-05-18	Mexico	VER	VER-LANGEBIO_IMSS_1103	EPI_ISL_2671737	B.1.1.7	2021-05-18
Mexico|VER_LANGEBIO_IMSS_11722-NC|EPI_ISL_2970055|B.1.1.7|2021-05-18	Mexico	VER	VER_LANGEBIO_IMSS_11722-NC	EPI_ISL_2970055	B.1.1.7	2021-05-18
Mexico|VER-LANGEBIO_IMSS_1105|EPI_ISL_2671739|B.1.1.7|2021-05-18	Mexico	VER	VER-LANGEBIO_IMSS_1105	EPI_ISL_2671739	B.1.1.7	2021-05-18
Mexico|YUC-InDRE_FB16582_S2747|EPI_ISL_2533773|B.1.1.7|2021-05-18	Mexico	YUC	YUC-InDRE_FB16582_S2747	EPI_ISL_2533773	B.1.1.7	2021-05-18
Mexico|GUA-InDRE_FB16219_S2467|EPI_ISL_2455988|B.1.1.7|2021-05-19	Mexico	GUA	GUA-InDRE_FB16219_S2467	EPI_ISL_2455988	B.1.1.7	2021-05-19
Mexico|MEX-InDRE_FD71099_S2783|EPI_ISL_2533809|B.1.1.7|2021-05-19	Mexico	MEX	MEX-InDRE_FD71099_S2783	EPI_ISL_2533809	B.1.1.7	2021-05-19
Mexico|QUE-InDRE_FB16154_S2438|EPI_ISL_2455962|B.1.1.7|2021-05-19	Mexico	QUE	QUE-InDRE_FB16154_S2438	EPI_ISL_2455962	B.1.1.7	2021-05-19
Mexico|ROO-LANGEBIO_IMSS_0928|EPI_ISL_2671673|B.1.1.7|2021-05-19	Mexico	ROO	ROO-LANGEBIO_IMSS_0928	EPI_ISL_2671673	B.1.1.7	2021-05-19
Mexico|ROO-LANGEBIO_IMSS_0926|EPI_ISL_2671671|B.1.1.7|2021-05-19	Mexico	ROO	ROO-LANGEBIO_IMSS_0926	EPI_ISL_2671671	B.1.1.7	2021-05-19
Mexico|YUC-InDRE_FB16588_S2749|EPI_ISL_2533775|B.1.1.7|2021-05-19	Mexico	YUC	YUC-InDRE_FB16588_S2749	EPI_ISL_2533775	B.1.1.7	2021-05-19
Mexico|CAM-LANGEBIO_IMSS_0940|EPI_ISL_2671501|B.1.1.7|2021-05-20	Mexico	CAM	CAM-LANGEBIO_IMSS_0940	EPI_ISL_2671501	B.1.1.7	2021-05-20
Mexico|CMX-InDRE_FD71675_S3077|EPI_ISL_2663344|B.1.1.7|2021-05-20	Mexico	CMX	CMX-InDRE_FD71675_S3077	EPI_ISL_2663344	B.1.1.7	2021-05-20
Mexico|CMX-INMEGEN-05-05-239|EPI_ISL_2444542|B.1.1.7|2021-05-20	Mexico	CMX	CMX-INMEGEN-05-05-239	EPI_ISL_2444542	B.1.1.7	2021-05-20
Mexico|QUE-InDRE_FB16436_S2739|EPI_ISL_2533765|B.1.1.7|2021-05-20	Mexico	QUE	QUE-InDRE_FB16436_S2739	EPI_ISL_2533765	B.1.1.7	2021-05-20
Mexico|YUC-InDRE_FB16617_S2756|EPI_ISL_2533782|B.1.1.7|2021-05-20	Mexico	YUC	YUC-InDRE_FB16617_S2756	EPI_ISL_2533782	B.1.1.7	2021-05-20
Mexico|YUC-InDRE_FB16611_S2754|EPI_ISL_2533780|B.1.1.7|2021-05-20	Mexico	YUC	YUC-InDRE_FB16611_S2754	EPI_ISL_2533780	B.1.1.7	2021-05-20
Mexico|HID-INMEGEN-05-05-141|EPI_ISL_2444484|B.1.1.7|2021-05-21	Mexico	HID	HID-INMEGEN-05-05-141	EPI_ISL_2444484	B.1.1.7	2021-05-21
Mexico|ROO-LANGEBIO_IMSS_0937|EPI_ISL_2671680|B.1.1.7|2021-05-21	Mexico	ROO	ROO-LANGEBIO_IMSS_0937	EPI_ISL_2671680	B.1.1.7	2021-05-21
Mexico|YUC-InDRE_FB16638_S2757|EPI_ISL_2533783|B.1.1.7|2021-05-21	Mexico	YUC	YUC-InDRE_FB16638_S2757	EPI_ISL_2533783	B.1.1.7	2021-05-21
Mexico|GUA-InDRE_FB16459_S3475|EPI_ISL_2778990|B.1.1.7|2021-05-24	Mexico	GUA	GUA-InDRE_FB16459_S3475	EPI_ISL_2778990	B.1.1.7	2021-05-24
Mexico|YUC-InDRE_FB16657_S2759|EPI_ISL_2533785|B.1.1.7|2021-05-24	Mexico	YUC	YUC-InDRE_FB16657_S2759	EPI_ISL_2533785	B.1.1.7	2021-05-24
Mexico|GUA-InDRE_FB16460_S3779|EPI_ISL_2779281|B.1.1.7|2021-05-25	Mexico	GUA	GUA-InDRE_FB16460_S3779	EPI_ISL_2779281	B.1.1.7	2021-05-25
Mexico|GUA-InDRE_FB16463_S3476|EPI_ISL_2778991|B.1.1.7|2021-05-25	Mexico	GUA	GUA-InDRE_FB16463_S3476	EPI_ISL_2778991	B.1.1.7	2021-05-25
Mexico|JAL-LANGEBIO_IMSS_1024|EPI_ISL_2671577|B.1.1.7|2021-05-25	Mexico	JAL	JAL-LANGEBIO_IMSS_1024	EPI_ISL_2671577	B.1.1.7	2021-05-25
Mexico|YUC-InDRE_FB16674_S2766|EPI_ISL_2533792|B.1.1.7|2021-05-25	Mexico	YUC	YUC-InDRE_FB16674_S2766	EPI_ISL_2533792	B.1.1.7	2021-05-25
Mexico|YUC-InDRE_FB16672_S2765|EPI_ISL_2533791|B.1.1.7|2021-05-25	Mexico	YUC	YUC-InDRE_FB16672_S2765	EPI_ISL_2533791	B.1.1.7	2021-05-25
Mexico|ZAC_IBT_IMSS_1462|EPI_ISL_2681120|B.1.1.7|2021-05-25	Mexico	ZAC	ZAC_IBT_IMSS_1462	EPI_ISL_2681120	B.1.1.7	2021-05-25
Mexico|CMX-INMEGEN-05-06-40|EPI_ISL_2603625|B.1.1.7|2021-05-26	Mexico	CMX	CMX-INMEGEN-05-06-40	EPI_ISL_2603625	B.1.1.7	2021-05-26
Mexico|HID-InDRE_FB17214_S3096|EPI_ISL_2663363|B.1.1.7|2021-05-26	Mexico	HID	HID-InDRE_FB17214_S3096	EPI_ISL_2663363	B.1.1.7	2021-05-26
Mexico|HID-InDRE_FB17213_S3095|EPI_ISL_2663362|B.1.1.7|2021-05-26	Mexico	HID	HID-InDRE_FB17213_S3095	EPI_ISL_2663362	B.1.1.7	2021-05-26
Mexico|QUE-InDRE_FB16437_S2740|EPI_ISL_2533766|B.1.1.7|2021-05-26	Mexico	QUE	QUE-InDRE_FB16437_S2740	EPI_ISL_2533766	B.1.1.7	2021-05-26
Mexico|ROO-InDRE_FB16795_S2779|EPI_ISL_2533805|B.1.1.7|2021-05-26	Mexico	ROO	ROO-InDRE_FB16795_S2779	EPI_ISL_2533805	B.1.1.7	2021-05-26
Mexico|YUC-NYGC-1163-SM|EPI_ISL_3023819|B.1.1.7|2021-05-26	Mexico	YUC	YUC-NYGC-1163-SM	EPI_ISL_3023819	B.1.1.7	2021-05-26
Mexico|YUC-InDRE_FB16678_S2767|EPI_ISL_2533793|B.1.1.7|2021-05-26	Mexico	YUC	YUC-InDRE_FB16678_S2767	EPI_ISL_2533793	B.1.1.7	2021-05-26
Mexico|ZAC_IBT_IMSS_1470|EPI_ISL_2681121|B.1.1.7|2021-05-26	Mexico	ZAC	ZAC_IBT_IMSS_1470	EPI_ISL_2681121	B.1.1.7	2021-05-26
Mexico|CMX-INMEGEN-05-06-77|EPI_ISL_2603651|B.1.1.7|2021-05-27	Mexico	CMX	CMX-INMEGEN-05-06-77	EPI_ISL_2603651	B.1.1.7	2021-05-27
Mexico|CMX-INMEGEN-05-06-76|EPI_ISL_2603650|B.1.1.7|2021-05-27	Mexico	CMX	CMX-INMEGEN-05-06-76	EPI_ISL_2603650	B.1.1.7	2021-05-27
Mexico|CMX-INMEGEN-05-06-55|EPI_ISL_2603634|B.1.1.7|2021-05-27	Mexico	CMX	CMX-INMEGEN-05-06-55	EPI_ISL_2603634	B.1.1.7	2021-05-27
Mexico|CMX-INMEGEN-05-06-273|EPI_ISL_2603742|B.1.1.7|2021-05-28	Mexico	CMX	CMX-INMEGEN-05-06-273	EPI_ISL_2603742	B.1.1.7	2021-05-28
Mexico|CMX-INMEGEN-05-06-202|EPI_ISL_2603691|B.1.1.7|2021-05-28	Mexico	CMX	CMX-INMEGEN-05-06-202	EPI_ISL_2603691	B.1.1.7	2021-05-28
Mexico|CMX-INMEGEN-05-06-78|EPI_ISL_2603652|B.1.1.7|2021-05-28	Mexico	CMX	CMX-INMEGEN-05-06-78	EPI_ISL_2603652	B.1.1.7	2021-05-28
Mexico|MEX-INMEGEN-05-06-340|EPI_ISL_2603791|B.1.1.7|2021-05-28	Mexico	MEX	MEX-INMEGEN-05-06-340	EPI_ISL_2603791	B.1.1.7	2021-05-28
USA|NV-CDC-LC0068070|EPI_ISL_2482223|B.1.1.7|2021-05-28	USA	Other	NV-CDC-LC0068070	EPI_ISL_2482223	B.1.1.7	2021-05-28
Mexico|YUC-InDRE_FB16549_S3111|EPI_ISL_2663378|B.1.1.7|2021-05-28	Mexico	YUC	YUC-InDRE_FB16549_S3111	EPI_ISL_2663378	B.1.1.7	2021-05-28
Mexico|ZAC_IBT_IMSS_1472|EPI_ISL_2681092|B.1.1.7|2021-05-28	Mexico	ZAC	ZAC_IBT_IMSS_1472	EPI_ISL_2681092	B.1.1.7	2021-05-28
Mexico|CMX-INMEGEN-06-01-40|EPI_ISL_2616914|B.1.1.7|2021-05-29	Mexico	CMX	CMX-INMEGEN-06-01-40	EPI_ISL_2616914	B.1.1.7	2021-05-29
Mexico|CMX-INMEGEN-05-06-286|EPI_ISL_2603754|B.1.1.7|2021-05-29	Mexico	CMX	CMX-INMEGEN-05-06-286	EPI_ISL_2603754	B.1.1.7	2021-05-29
Mexico|COA_IBT_IMSS_1400|EPI_ISL_2681095|B.1.1.7|2021-05-29	Mexico	COA	COA_IBT_IMSS_1400	EPI_ISL_2681095	B.1.1.7	2021-05-29
Mexico|NLE-InDRE_FB16950_S3122|EPI_ISL_2663389|B.1.1.7|2021-05-29	Mexico	NLE	NLE-InDRE_FB16950_S3122	EPI_ISL_2663389	B.1.1.7	2021-05-29
Mexico|JAL-InDRE_FB16511_S2741|EPI_ISL_2533767|B.1.1.7|2021-05-30	Mexico	JAL	JAL-InDRE_FB16511_S2741	EPI_ISL_2533767	B.1.1.7	2021-05-30
Mexico|QUE-InDRE_FB16868_S3113|EPI_ISL_2663380|B.1.1.7|2021-05-30	Mexico	QUE	QUE-InDRE_FB16868_S3113	EPI_ISL_2663380	B.1.1.7	2021-05-30
Mexico|VER_IBT_IMSS_1650|EPI_ISL_2681350|B.1.1.7|2021-05-30	Mexico	VER	VER_IBT_IMSS_1650	EPI_ISL_2681350	B.1.1.7	2021-05-30
Mexico|GUA-InDRE_FB16899_S3118|EPI_ISL_2663385|B.1.1.7|2021-05-31	Mexico	GUA	GUA-InDRE_FB16899_S3118	EPI_ISL_2663385	B.1.1.7	2021-05-31
Mexico|HID-InDRE_FB17226_S3101|EPI_ISL_2663368|B.1.1.7|2021-05-31	Mexico	HID	HID-InDRE_FB17226_S3101	EPI_ISL_2663368	B.1.1.7	2021-05-31
Mexico|ROO_IBT_IMSS_1732|EPI_ISL_2681050|B.1.1.7|2021-05-31	Mexico	ROO	ROO_IBT_IMSS_1732	EPI_ISL_2681050	B.1.1.7	2021-05-31
Mexico|VER-INMEGEN-05-06-207|EPI_ISL_2603696|B.1.1.7|2021-05-31	Mexico	VER	VER-INMEGEN-05-06-207	EPI_ISL_2603696	B.1.1.7	2021-05-31
Mexico|CAM_IBT_IMSS_1746|EPI_ISL_2681118|B.1.1.7|2021-06-01	Mexico	CAM	CAM_IBT_IMSS_1746	EPI_ISL_2681118	B.1.1.7	2021-06-01
Mexico|ROO-INMEGEN-05-06-205|EPI_ISL_2603694|B.1.1.7|2021-06-01	Mexico	ROO	ROO-INMEGEN-05-06-205	EPI_ISL_2603694	B.1.1.7	2021-06-01
Mexico|ROO-InDRE_FB17192_S3090|EPI_ISL_2663357|B.1.1.7|2021-06-01	Mexico	ROO	ROO-InDRE_FB17192_S3090	EPI_ISL_2663357	B.1.1.7	2021-06-01
Mexico|VER-INMEGEN-05-06-246|EPI_ISL_2881841|B.1.1.7|2021-06-01	Mexico	VER	VER-INMEGEN-05-06-246	EPI_ISL_2881841	B.1.1.7	2021-06-01
Mexico|YUC-InDRE_FB17498_S3497|EPI_ISL_2779012|B.1.1.7|2021-06-01	Mexico	YUC	YUC-InDRE_FB17498_S3497	EPI_ISL_2779012	B.1.1.7	2021-06-01
Mexico|YUC-InDRE_FB17506_S3500|EPI_ISL_2779015|B.1.1.7|2021-06-01	Mexico	YUC	YUC-InDRE_FB17506_S3500	EPI_ISL_2779015	B.1.1.7	2021-06-01
Mexico|YUC-InDRE_FB17480_S3493|EPI_ISL_2779008|B.1.1.7|2021-06-01	Mexico	YUC	YUC-InDRE_FB17480_S3493	EPI_ISL_2779008	B.1.1.7	2021-06-01
Mexico|YUC-InDRE_FB17482_S3494|EPI_ISL_2779009|B.1.1.7|2021-06-01	Mexico	YUC	YUC-InDRE_FB17482_S3494	EPI_ISL_2779009	B.1.1.7	2021-06-01
Mexico|SIN_CIAD-MZT_HJ1739|EPI_ISL_2680932|B.1.1.7|2021-06-02	Mexico	SIN	SIN_CIAD-MZT_HJ1739	EPI_ISL_2680932	B.1.1.7	2021-06-02
Mexico|SIN_CIAD-MZT_HJ1742|EPI_ISL_2680933|B.1.1.7|2021-06-02	Mexico	SIN	SIN_CIAD-MZT_HJ1742	EPI_ISL_2680933	B.1.1.7	2021-06-02
Mexico|CAM-IBT_IMSS_1865|EPI_ISL_2801583|B.1.1.7|2021-06-03	Mexico	CAM	CAM-IBT_IMSS_1865	EPI_ISL_2801583	B.1.1.7	2021-06-03
Mexico|MEX-INMEGEN-06-03-185|EPI_ISL_2810167|B.1.1.7|2021-06-03	Mexico	MEX	MEX-INMEGEN-06-03-185	EPI_ISL_2810167	B.1.1.7	2021-06-03
Mexico|ROO-INMEGEN-06-01-322|EPI_ISL_2616965|B.1.1.7|2021-06-03	Mexico	ROO	ROO-INMEGEN-06-01-322	EPI_ISL_2616965	B.1.1.7	2021-06-03
Mexico|YUC-InDRE_FB17518_S3502|EPI_ISL_2779017|B.1.1.7|2021-06-03	Mexico	YUC	YUC-InDRE_FB17518_S3502	EPI_ISL_2779017	B.1.1.7	2021-06-03
Mexico|YUC-INMEGEN-06-01-258|EPI_ISL_2616939|B.1.1.7|2021-06-03	Mexico	YUC	YUC-INMEGEN-06-01-258	EPI_ISL_2616939	B.1.1.7	2021-06-03
Mexico|YUC-INMEGEN-06-01-307|EPI_ISL_2616932|B.1.1.7|2021-06-03	Mexico	YUC	YUC-INMEGEN-06-01-307	EPI_ISL_2616932	B.1.1.7	2021-06-03
Mexico|YUC-INMEGEN-06-01-338|EPI_ISL_2616966|B.1.1.7|2021-06-03	Mexico	YUC	YUC-INMEGEN-06-01-338	EPI_ISL_2616966	B.1.1.7	2021-06-03
Mexico|CAM-IBT_IMSS_1876|EPI_ISL_2801584|B.1.1.7|2021-06-04	Mexico	CAM	CAM-IBT_IMSS_1876	EPI_ISL_2801584	B.1.1.7	2021-06-04
Mexico|HID-INMEGEN-06-03-186|EPI_ISL_2810168|B.1.1.7|2021-06-04	Mexico	HID	HID-INMEGEN-06-03-186	EPI_ISL_2810168	B.1.1.7	2021-06-04
Mexico|QUE-InDRE_FB16876_S3114|EPI_ISL_2663381|B.1.1.7|2021-06-04	Mexico	QUE	QUE-InDRE_FB16876_S3114	EPI_ISL_2663381	B.1.1.7	2021-06-04
Mexico|SIN_CIAD-MZT_HJ1755|EPI_ISL_2680936|B.1.1.7|2021-06-04	Mexico	SIN	SIN_CIAD-MZT_HJ1755	EPI_ISL_2680936	B.1.1.7	2021-06-04
Mexico|VER-IBT_IMSS_1990|EPI_ISL_2801847|B.1.1.7|2021-06-04	Mexico	VER	VER-IBT_IMSS_1990	EPI_ISL_2801847	B.1.1.7	2021-06-04
Mexico|YUC_IBT_IMSS_1748|EPI_ISL_2681328|B.1.1.7|2021-06-04	Mexico	YUC	YUC_IBT_IMSS_1748	EPI_ISL_2681328	B.1.1.7	2021-06-04
Mexico|YUC-IBT_IMSS_1845|EPI_ISL_2801564|B.1.1.7|2021-06-04	Mexico	YUC	YUC-IBT_IMSS_1845	EPI_ISL_2801564	B.1.1.7	2021-06-04
Mexico|ROO-IBT_IMSS_2106|EPI_ISL_2801653|B.1.1.7|2021-06-05	Mexico	ROO	ROO-IBT_IMSS_2106	EPI_ISL_2801653	B.1.1.7	2021-06-05
Mexico|SIN_CIAD-MZT_S7016|EPI_ISL_2680938|B.1.1.7|2021-06-05	Mexico	SIN	SIN_CIAD-MZT_S7016	EPI_ISL_2680938	B.1.1.7	2021-06-05
Mexico|ROO-INMEGEN-06-02-58|EPI_ISL_2692591|B.1.1.7|2021-06-06	Mexico	ROO	ROO-INMEGEN-06-02-58	EPI_ISL_2692591	B.1.1.7	2021-06-06
Mexico|VER-IBT_IMSS_1998|EPI_ISL_2801851|B.1.1.7|2021-06-06	Mexico	VER	VER-IBT_IMSS_1998	EPI_ISL_2801851	B.1.1.7	2021-06-06
Mexico|YUC-INMEGEN-06-02-35|EPI_ISL_2692570|B.1.1.7|2021-06-06	Mexico	YUC	YUC-INMEGEN-06-02-35	EPI_ISL_2692570	B.1.1.7	2021-06-06
Mexico|CAM-IBT_IMSS_2098|EPI_ISL_2801645|B.1.1.7|2021-06-07	Mexico	CAM	CAM-IBT_IMSS_2098	EPI_ISL_2801645	B.1.1.7	2021-06-07
Mexico|GUA-InDRE_FB17325_S3532|EPI_ISL_2779047|B.1.1.7|2021-06-07	Mexico	GUA	GUA-InDRE_FB17325_S3532	EPI_ISL_2779047	B.1.1.7	2021-06-07
Mexico|ROO-INMEGEN-06-02-7|EPI_ISL_2692545|B.1.1.7|2021-06-07	Mexico	ROO	ROO-INMEGEN-06-02-7	EPI_ISL_2692545	B.1.1.7	2021-06-07
Mexico|ROO-INMEGEN-06-02-104|EPI_ISL_2692631|B.1.1.7|2021-06-07	Mexico	ROO	ROO-INMEGEN-06-02-104	EPI_ISL_2692631	B.1.1.7	2021-06-07
Mexico|CMX-LANGEBIO_IMSS_1461|EPI_ISL_2942580|B.1.1.7|2021-06-08	Mexico	CMX	CMX-LANGEBIO_IMSS_1461	EPI_ISL_2942580	B.1.1.7	2021-06-08
Mexico|HID-InDRE_FB17239_S3104|EPI_ISL_2663371|B.1.1.7|2021-06-08	Mexico	HID	HID-InDRE_FB17239_S3104	EPI_ISL_2663371	B.1.1.7	2021-06-08
Mexico|ROO-INMEGEN-06-03-296|EPI_ISL_2810258|B.1.1.7|2021-06-08	Mexico	ROO	ROO-INMEGEN-06-03-296	EPI_ISL_2810258	B.1.1.7	2021-06-08
Mexico|VER-InDRE_FB17434_S3931|EPI_ISL_2858945|B.1.1.7|2021-06-08	Mexico	VER	VER-InDRE_FB17434_S3931	EPI_ISL_2858945	B.1.1.7	2021-06-08
Mexico|YUC_IBT_IMSS_2075|EPI_ISL_3133728|B.1.1.7|2021-06-08	Mexico	YUC	YUC_IBT_IMSS_2075	EPI_ISL_3133728	B.1.1.7	2021-06-08
Mexico|ZAC-IBT_IMSS_1826|EPI_ISL_2801701|B.1.1.7|2021-06-08	Mexico	ZAC	ZAC-IBT_IMSS_1826	EPI_ISL_2801701	B.1.1.7	2021-06-08
Mexico|CAM-InDRE_FB17371_S3924|EPI_ISL_2858938|B.1.1.7|2021-06-09	Mexico	CAM	CAM-InDRE_FB17371_S3924	EPI_ISL_2858938	B.1.1.7	2021-06-09
Mexico|HID-InDRE_FB17246_S3108|EPI_ISL_2663375|B.1.1.7|2021-06-09	Mexico	HID	HID-InDRE_FB17246_S3108	EPI_ISL_2663375	B.1.1.7	2021-06-09
Mexico|HID-InDRE_FB17245_S3107|EPI_ISL_2663374|B.1.1.7|2021-06-09	Mexico	HID	HID-InDRE_FB17245_S3107	EPI_ISL_2663374	B.1.1.7	2021-06-09
Mexico|ROO-INMEGEN-06-03-289|EPI_ISL_2810251|B.1.1.7|2021-06-09	Mexico	ROO	ROO-INMEGEN-06-03-289	EPI_ISL_2810251	B.1.1.7	2021-06-09
Mexico|SIN_CIAD-MZT_HJ1782|EPI_ISL_2894558|B.1.1.7|2021-06-09	Mexico	SIN	SIN_CIAD-MZT_HJ1782	EPI_ISL_2894558	B.1.1.7	2021-06-09
Mexico|VER-INMEGEN-06-02-376|EPI_ISL_2692852|B.1.1.7|2021-06-09	Mexico	VER	VER-INMEGEN-06-02-376	EPI_ISL_2692852	B.1.1.7	2021-06-09
Mexico|VER-INMEGEN-06-02-372|EPI_ISL_2692848|B.1.1.7|2021-06-09	Mexico	VER	VER-INMEGEN-06-02-372	EPI_ISL_2692848	B.1.1.7	2021-06-09
Mexico|VER-INMEGEN-06-04-6|EPI_ISL_2894156|B.1.1.7|2021-06-09	Mexico	VER	VER-INMEGEN-06-04-6	EPI_ISL_2894156	B.1.1.7	2021-06-09
Mexico|YUC-InDRE_FB17580_S3508|EPI_ISL_2779023|B.1.1.7|2021-06-09	Mexico	YUC	YUC-InDRE_FB17580_S3508	EPI_ISL_2779023	B.1.1.7	2021-06-09
Mexico|YUC-INMEGEN-06-04-59|EPI_ISL_2894203|B.1.1.7|2021-06-09	Mexico	YUC	YUC-INMEGEN-06-04-59	EPI_ISL_2894203	B.1.1.7	2021-06-09
Mexico|YUC-INMEGEN-06-04-84|EPI_ISL_2894227|B.1.1.7|2021-06-09	Mexico	YUC	YUC-INMEGEN-06-04-84	EPI_ISL_2894227	B.1.1.7	2021-06-09
Mexico|QUE-InDRE_FB17259_S3110|EPI_ISL_2663377|B.1.1.7|2021-06-10	Mexico	QUE	QUE-InDRE_FB17259_S3110	EPI_ISL_2663377	B.1.1.7	2021-06-10
Mexico|NLE-IBT_IMSS_66028-NC|EPI_ISL_2801687|B.1.1.7|2021-06-11	Mexico	NLE	NLE-IBT_IMSS_66028-NC	EPI_ISL_2801687	B.1.1.7	2021-06-11
Mexico|PUE-LANGEBIO_IMSS_1387|EPI_ISL_2942515|B.1.1.7|2021-06-11	Mexico	PUE	PUE-LANGEBIO_IMSS_1387	EPI_ISL_2942515	B.1.1.7	2021-06-11
Mexico|ROO-INMEGEN-06-04-313|EPI_ISL_2894360|B.1.1.7|2021-06-11	Mexico	ROO	ROO-INMEGEN-06-04-313	EPI_ISL_2894360	B.1.1.7	2021-06-11
Mexico|SIN_CIAD-CLN_D0557|EPI_ISL_2927968|B.1.1.7|2021-06-12	Mexico	SIN	SIN_CIAD-CLN_D0557	EPI_ISL_2927968	B.1.1.7	2021-06-12
Mexico|ZAC-IBT_IMSS_1831|EPI_ISL_2801706|B.1.1.7|2021-06-13	Mexico	ZAC	ZAC-IBT_IMSS_1831	EPI_ISL_2801706	B.1.1.7	2021-06-13
Mexico|CMX-INMEGEN-06-03-163|EPI_ISL_2810149|B.1.1.7|2021-06-14	Mexico	CMX	CMX-INMEGEN-06-03-163	EPI_ISL_2810149	B.1.1.7	2021-06-14
Mexico|CMX-InDRE_FB19386_S4507|EPI_ISL_3033361|B.1.1.7|2021-06-14	Mexico	CMX	CMX-InDRE_FB19386_S4507	EPI_ISL_3033361	B.1.1.7	2021-06-14
Mexico|HID-InDRE_FB17887_S3933|EPI_ISL_2858947|B.1.1.7|2021-06-14	Mexico	HID	HID-InDRE_FB17887_S3933	EPI_ISL_2858947	B.1.1.7	2021-06-14
Mexico|YUC-InDRE_FB17453_S3932|EPI_ISL_2858946|B.1.1.7|2021-06-14	Mexico	YUC	YUC-InDRE_FB17453_S3932	EPI_ISL_2858946	B.1.1.7	2021-06-14
Mexico|ZAC-InDRE_FB17736_S4113|EPI_ISL_2920684|B.1.1.7|2021-06-14	Mexico	ZAC	ZAC-InDRE_FB17736_S4113	EPI_ISL_2920684	B.1.1.7	2021-06-14
Mexico|YUC-Biomedicos-6150004|EPI_ISL_2928339|B.1.1.7|2021-06-15	Mexico	YUC	YUC-Biomedicos-6150004	EPI_ISL_2928339	B.1.1.7	2021-06-15
Mexico|GRO-LANGEBIO_IMSS_1391|EPI_ISL_2942518|B.1.1.7|2021-06-16	Mexico	GRO	GRO-LANGEBIO_IMSS_1391	EPI_ISL_2942518	B.1.1.7	2021-06-16
Mexico|MEX-INMEGEN-06-02-194|EPI_ISL_2778956|B.1.1.7|2021-06-16	Mexico	MEX	MEX-INMEGEN-06-02-194	EPI_ISL_2778956	B.1.1.7	2021-06-16
Mexico|SIN-InDRE_FB18120_S3959|EPI_ISL_2858973|B.1.1.7|2021-06-16	Mexico	SIN	SIN-InDRE_FB18120_S3959	EPI_ISL_2858973	B.1.1.7	2021-06-16
Mexico|YUC-INMEGEN-16-340|EPI_ISL_2978645|B.1.1.7|2021-06-16	Mexico	YUC	YUC-INMEGEN-16-340	EPI_ISL_2978645	B.1.1.7	2021-06-16
Mexico|CMX-InDRE_FB19393_S4508|EPI_ISL_3046076|B.1.1.7|2021-06-17	Mexico	CMX	CMX-InDRE_FB19393_S4508	EPI_ISL_3046076	B.1.1.7	2021-06-17
Mexico|CAM-LANGEBIO_IMSS_1205|EPI_ISL_2942366|B.1.1.7|2021-06-18	Mexico	CAM	CAM-LANGEBIO_IMSS_1205	EPI_ISL_2942366	B.1.1.7	2021-06-18
Mexico|VER-LANGEBIO_IMSS_1428|EPI_ISL_2942551|B.1.1.7|2021-06-18	Mexico	VER	VER-LANGEBIO_IMSS_1428	EPI_ISL_2942551	B.1.1.7	2021-06-18
Mexico|CAM-LANGEBIO_IMSS_1207|EPI_ISL_2942368|B.1.1.7|2021-06-20	Mexico	CAM	CAM-LANGEBIO_IMSS_1207	EPI_ISL_2942368	B.1.1.7	2021-06-20
Mexico|BCN-LANGEBIO_IMSS_1439|EPI_ISL_2942561|B.1.1.7|2021-06-21	Mexico	BCN	BCN-LANGEBIO_IMSS_1439	EPI_ISL_2942561	B.1.1.7	2021-06-21
Mexico|CAM-LANGEBIO_IMSS_1231|EPI_ISL_2942392|B.1.1.7|2021-06-21	Mexico	CAM	CAM-LANGEBIO_IMSS_1231	EPI_ISL_2942392	B.1.1.7	2021-06-21
Mexico|PUE-InDRE_FB19622_S4513|EPI_ISL_3033366|B.1.1.7|2021-06-21	Mexico	PUE	PUE-InDRE_FB19622_S4513	EPI_ISL_3033366	B.1.1.7	2021-06-21
Mexico|ROO-InDRE_FB19165_S4499|EPI_ISL_3033353|B.1.1.7|2021-06-21	Mexico	ROO	ROO-InDRE_FB19165_S4499	EPI_ISL_3033353	B.1.1.7	2021-06-21
Mexico|HID-InDRE_FB19127_S4494|EPI_ISL_3033348|B.1.1.7|2021-06-22	Mexico	HID	HID-InDRE_FB19127_S4494	EPI_ISL_3033348	B.1.1.7	2021-06-22
Mexico|TAB-InDRE_FB18500_S4148|EPI_ISL_2920719|B.1.1.7|2021-06-22	Mexico	TAB	TAB-InDRE_FB18500_S4148	EPI_ISL_2920719	B.1.1.7	2021-06-22
Mexico|YUC-INMEGEN-17-140|EPI_ISL_3067914|B.1.1.7|2021-06-22	Mexico	YUC	YUC-INMEGEN-17-140	EPI_ISL_3067914	B.1.1.7	2021-06-22
Mexico|ROO-INMEGEN-16-350|EPI_ISL_2978654|B.1.1.7|2021-06-23	Mexico	ROO	ROO-INMEGEN-16-350	EPI_ISL_2978654	B.1.1.7	2021-06-23
Mexico|YUC-INMEGEN-16-352|EPI_ISL_2978656|B.1.1.7|2021-06-23	Mexico	YUC	YUC-INMEGEN-16-352	EPI_ISL_2978656	B.1.1.7	2021-06-23
Mexico|CMX-INMEGEN-06-03-32|EPI_ISL_2810050|B.1.1.7|2021-06-24	Mexico	CMX	CMX-INMEGEN-06-03-32	EPI_ISL_2810050	B.1.1.7	2021-06-24
Mexico|CMX-INMEGEN-06-03-65|EPI_ISL_2810074|B.1.1.7|2021-06-24	Mexico	CMX	CMX-INMEGEN-06-03-65	EPI_ISL_2810074	B.1.1.7	2021-06-24
Mexico|CMX-INMEGEN-06-04-209|EPI_ISL_2894274|B.1.1.7|2021-06-25	Mexico	CMX	CMX-INMEGEN-06-04-209	EPI_ISL_2894274	B.1.1.7	2021-06-25
Mexico|HID-InDRE_FB19137_S4497|EPI_ISL_3033351|B.1.1.7|2021-06-25	Mexico	HID	HID-InDRE_FB19137_S4497	EPI_ISL_3033351	B.1.1.7	2021-06-25
Mexico|HID-LANGEBIO_IMSS_1451|EPI_ISL_2942571|B.1.1.7|2021-06-25	Mexico	HID	HID-LANGEBIO_IMSS_1451	EPI_ISL_2942571	B.1.1.7	2021-06-25
Mexico|HID-InDRE_FB19136_S4496|EPI_ISL_3033350|B.1.1.7|2021-06-25	Mexico	HID	HID-InDRE_FB19136_S4496	EPI_ISL_3033350	B.1.1.7	2021-06-25
Mexico|CAM-LANGEBIO_IMSS_1548|EPI_ISL_2942659|B.1.1.7|2021-06-26	Mexico	CAM	CAM-LANGEBIO_IMSS_1548	EPI_ISL_2942659	B.1.1.7	2021-06-26
Mexico|ROO-LANGEBIO_IMSS_1590|EPI_ISL_2942701|B.1.1.7|2021-06-28	Mexico	ROO	ROO-LANGEBIO_IMSS_1590	EPI_ISL_2942701	B.1.1.7	2021-06-28
Mexico|TAB-InDRE_FB19055_S4487|EPI_ISL_3033341|B.1.1.7|2021-06-28	Mexico	TAB	TAB-InDRE_FB19055_S4487	EPI_ISL_3033341	B.1.1.7	2021-06-28

## Sheet: B_1_1_7_C4a
Name	Country	State	ID	GSAID	Lineage	Date
Mexico|QUE-InDRE_FB17258_S3109|EPI_ISL_2663376|B.1.1.7|2021-02-14	Mexico	QUE	QUE-InDRE_FB17258_S3109	EPI_ISL_2663376	B.1.1.7	2021-02-14
Mexico|CMX-InDRE_FD64253_S2063|EPI_ISL_2295589|B.1.1.7|2021-03-05	Mexico	CMX	CMX-InDRE_FD64253_S2063	EPI_ISL_2295589	B.1.1.7	2021-03-05
Mexico|PUE_LANGEBIO_IMSS_0438|EPI_ISL_1662170|B.1.1.7|2021-03-23	Mexico	PUE	PUE_LANGEBIO_IMSS_0438	EPI_ISL_1662170	B.1.1.7	2021-03-23
Mexico|CMX-INER-INMEGEN-00149|EPI_ISL_1824495|B.1.1.7|2021-04-09	Mexico	CMX	CMX-INER-INMEGEN-00149	EPI_ISL_1824495	B.1.1.7	2021-04-09
Mexico|CMX-InDRE_FB13260_S1502|EPI_ISL_1805480|B.1.1.7|2021-04-10	Mexico	CMX	CMX-InDRE_FB13260_S1502	EPI_ISL_1805480	B.1.1.7	2021-04-10
Mexico|CMX-INMEGEN-InDRE-04-06-165|EPI_ISL_1810898|B.1.1.7|2021-04-16	Mexico	CMX	CMX-INMEGEN-InDRE-04-06-165	EPI_ISL_1810898	B.1.1.7	2021-04-16
Mexico|CMX-INMEGEN-InDRE-04-06-175|EPI_ISL_1810908|B.1.1.7|2021-04-16	Mexico	CMX	CMX-INMEGEN-InDRE-04-06-175	EPI_ISL_1810908	B.1.1.7	2021-04-16
Mexico|CMX-InDRE_FD54888_S1769|EPI_ISL_2101908|B.1.1.7|2021-04-19	Mexico	CMX	CMX-InDRE_FD54888_S1769	EPI_ISL_2101908	B.1.1.7	2021-04-19
Mexico|CMX-INMEGEN-04-06-38|EPI_ISL_1807344|B.1.1.7|2021-04-21	Mexico	CMX	CMX-INMEGEN-04-06-38	EPI_ISL_1807344	B.1.1.7	2021-04-21
Mexico|OAX_LANGEBIO_IMSS_0812|EPI_ISL_2402222|B.1.1.7|2021-04-23	Mexico	OAX	OAX_LANGEBIO_IMSS_0812	EPI_ISL_2402222	B.1.1.7	2021-04-23
Mexico|QUE_LANGEBIO_IMSS_0810|EPI_ISL_2402220|B.1.1.7|2021-04-23	Mexico	QUE	QUE_LANGEBIO_IMSS_0810	EPI_ISL_2402220	B.1.1.7	2021-04-23
Mexico|CMX-InDRE_FD57542_S1771|EPI_ISL_2101910|B.1.1.7|2021-04-26	Mexico	CMX	CMX-InDRE_FD57542_S1771	EPI_ISL_2101910	B.1.1.7	2021-04-26
Mexico|QUE_LANGEBIO_IMSS_0811|EPI_ISL_2402221|B.1.1.7|2021-04-26	Mexico	QUE	QUE_LANGEBIO_IMSS_0811	EPI_ISL_2402221	B.1.1.7	2021-04-26
Mexico|CMX-InDRE_FD58317_S1772|EPI_ISL_2101911|B.1.1.7|2021-04-27	Mexico	CMX	CMX-InDRE_FD58317_S1772	EPI_ISL_2101911	B.1.1.7	2021-04-27
Mexico|QUE-InDRE_FB15653_S2375|EPI_ISL_2455900|B.1.1.7|2021-04-27	Mexico	QUE	QUE-InDRE_FB15653_S2375	EPI_ISL_2455900	B.1.1.7	2021-04-27
Mexico|MEX-INMEGEN-05-01-256|EPI_ISL_2178757|B.1.1.7|2021-04-28	Mexico	MEX	MEX-INMEGEN-05-01-256	EPI_ISL_2178757	B.1.1.7	2021-04-28
Mexico|VER_IBT_IMSS_1330|EPI_ISL_2391554|B.1.1.7|2021-04-28	Mexico	VER	VER_IBT_IMSS_1330	EPI_ISL_2391554	B.1.1.7	2021-04-28
Mexico|OAX_INER_IMSS_1120|EPI_ISL_2490345|B.1.1.7|2021-04-29	Mexico	OAX	OAX_INER_IMSS_1120	EPI_ISL_2490345	B.1.1.7	2021-04-29
Mexico|VER_IBT_IMSS_1331|EPI_ISL_2391555|B.1.1.7|2021-04-29	Mexico	VER	VER_IBT_IMSS_1331	EPI_ISL_2391555	B.1.1.7	2021-04-29
Mexico|CMX_IBT_IMSS_1133|EPI_ISL_2391710|B.1.1.7|2021-04-30	Mexico	CMX	CMX_IBT_IMSS_1133	EPI_ISL_2391710	B.1.1.7	2021-04-30
Mexico|CMX-INMEGEN-05-01-177|EPI_ISL_2230880|B.1.1.7|2021-05-01	Mexico	CMX	CMX-INMEGEN-05-01-177	EPI_ISL_2230880	B.1.1.7	2021-05-01
Mexico|MEX-INMEGEN-05-02-162|EPI_ISL_2230883|B.1.1.7|2021-05-01	Mexico	MEX	MEX-INMEGEN-05-02-162	EPI_ISL_2230883	B.1.1.7	2021-05-01
Mexico|QUE-InDRE_FB15700_S2379|EPI_ISL_2455904|B.1.1.7|2021-05-01	Mexico	QUE	QUE-InDRE_FB15700_S2379	EPI_ISL_2455904	B.1.1.7	2021-05-01
Mexico|QUE-InDRE_FB14548_S2468|EPI_ISL_2455989|B.1.1.7|2021-05-01	Mexico	QUE	QUE-InDRE_FB14548_S2468	EPI_ISL_2455989	B.1.1.7	2021-05-01
Mexico|QUE-InDRE_FB14550_S2080|EPI_ISL_2283720|B.1.1.7|2021-05-01	Mexico	QUE	QUE-InDRE_FB14550_S2080	EPI_ISL_2283720	B.1.1.7	2021-05-01
Mexico|MEX-INMEGEN-05-01-345|EPI_ISL_2105850|B.1.1.7|2021-05-03	Mexico	MEX	MEX-INMEGEN-05-01-345	EPI_ISL_2105850	B.1.1.7	2021-05-03
Mexico|MEX-INMEGEN-05-03-368|EPI_ISL_2319412|B.1.1.7|2021-05-06	Mexico	MEX	MEX-INMEGEN-05-03-368	EPI_ISL_2319412	B.1.1.7	2021-05-06
Mexico|HID-INMEGEN-05-03-32|EPI_ISL_2319193|B.1.1.7|2021-05-07	Mexico	HID	HID-INMEGEN-05-03-32	EPI_ISL_2319193	B.1.1.7	2021-05-07
Mexico|HID-INMEGEN-05-03-29|EPI_ISL_2319191|B.1.1.7|2021-05-07	Mexico	HID	HID-INMEGEN-05-03-29	EPI_ISL_2319191	B.1.1.7	2021-05-07
Mexico|CMX-INMEGEN-05-03-104|EPI_ISL_2319256|B.1.1.7|2021-05-08	Mexico	CMX	CMX-INMEGEN-05-03-104	EPI_ISL_2319256	B.1.1.7	2021-05-08
Mexico|PUE_INER_IMSS_1323|EPI_ISL_2490353|B.1.1.7|2021-05-08	Mexico	PUE	PUE_INER_IMSS_1323	EPI_ISL_2490353	B.1.1.7	2021-05-08
Mexico|CMX-InDRE_FD64705_S2062|EPI_ISL_2295588|B.1.1.7|2021-05-09	Mexico	CMX	CMX-InDRE_FD64705_S2062	EPI_ISL_2295588	B.1.1.7	2021-05-09
Mexico|MEX-INMEGEN-05-03-153|EPI_ISL_2341033|B.1.1.7|2021-05-09	Mexico	MEX	MEX-INMEGEN-05-03-153	EPI_ISL_2341033	B.1.1.7	2021-05-09
Mexico|CMX-INMEGEN-05-03-161|EPI_ISL_2319294|B.1.1.7|2021-05-10	Mexico	CMX	CMX-INMEGEN-05-03-161	EPI_ISL_2319294	B.1.1.7	2021-05-10
Mexico|MEX-INMEGEN-05-04-94|EPI_ISL_2349952|B.1.1.7|2021-05-11	Mexico	MEX	MEX-INMEGEN-05-04-94	EPI_ISL_2349952	B.1.1.7	2021-05-11
Mexico|CMX-INMEGEN-INDRE-05-03-233|EPI_ISL_2319347|B.1.1.7|2021-05-12	Mexico	CMX	CMX-INMEGEN-INDRE-05-03-233	EPI_ISL_2319347	B.1.1.7	2021-05-12
Mexico|MEX-INMEGEN-05-04-113|EPI_ISL_2349967|B.1.1.7|2021-05-13	Mexico	MEX	MEX-INMEGEN-05-04-113	EPI_ISL_2349967	B.1.1.7	2021-05-13
Mexico|TAM-InDRE_FB16021_S2420|EPI_ISL_2455944|B.1.1.7|2021-05-17	Mexico	TAM	TAM-InDRE_FB16021_S2420	EPI_ISL_2455944	B.1.1.7	2021-05-17
Mexico|NLE-InDRE_FB16180_S2462|EPI_ISL_2455983|B.1.1.7|2021-05-18	Mexico	NLE	NLE-InDRE_FB16180_S2462	EPI_ISL_2455983	B.1.1.7	2021-05-18
Mexico|CMX-INMEGEN-05-06-73|EPI_ISL_2603647|B.1.1.7|2021-05-21	Mexico	CMX	CMX-INMEGEN-05-06-73	EPI_ISL_2603647	B.1.1.7	2021-05-21
Mexico|CMX-InDRE_FD72328_S2786|EPI_ISL_2533812|B.1.1.7|2021-05-21	Mexico	CMX	CMX-InDRE_FD72328_S2786	EPI_ISL_2533812	B.1.1.7	2021-05-21
Mexico|PUE_IBT_IMSS_1522|EPI_ISL_2681162|B.1.1.7|2021-05-22	Mexico	PUE	PUE_IBT_IMSS_1522	EPI_ISL_2681162	B.1.1.7	2021-05-22
Mexico|CMX_IBT_IMSS_1535|EPI_ISL_2681165|B.1.1.7|2021-05-25	Mexico	CMX	CMX_IBT_IMSS_1535	EPI_ISL_2681165	B.1.1.7	2021-05-25
Mexico|QUE-InDRE_FB16434_S2738|EPI_ISL_2533764|B.1.1.7|2021-05-25	Mexico	QUE	QUE-InDRE_FB16434_S2738	EPI_ISL_2533764	B.1.1.7	2021-05-25
Mexico|CMX-InDRE_FB17960_S3936|EPI_ISL_2858950|B.1.1.7|2021-05-26	Mexico	CMX	CMX-InDRE_FB17960_S3936	EPI_ISL_2858950	B.1.1.7	2021-05-26
Mexico|CMX-INMEGEN-05-06-66|EPI_ISL_2603641|B.1.1.7|2021-05-27	Mexico	CMX	CMX-INMEGEN-05-06-66	EPI_ISL_2603641	B.1.1.7	2021-05-27
Mexico|CMX-INMEGEN-05-06-79|EPI_ISL_2603653|B.1.1.7|2021-05-28	Mexico	CMX	CMX-INMEGEN-05-06-79	EPI_ISL_2603653	B.1.1.7	2021-05-28
Mexico|CMX-INMEGEN-05-06-72|EPI_ISL_2603646|B.1.1.7|2021-05-28	Mexico	CMX	CMX-INMEGEN-05-06-72	EPI_ISL_2603646	B.1.1.7	2021-05-28
Mexico|CMX-INMEGEN-05-06-84|EPI_ISL_2603655|B.1.1.7|2021-05-29	Mexico	CMX	CMX-INMEGEN-05-06-84	EPI_ISL_2603655	B.1.1.7	2021-05-29
Mexico|PUE_IBT_IMSS_1891|EPI_ISL_3133768|B.1.1.7|2021-05-30	Mexico	PUE	PUE_IBT_IMSS_1891	EPI_ISL_3133768	B.1.1.7	2021-05-30
Mexico|CMX-INMEGEN-05-06-93|EPI_ISL_2603658|B.1.1.7|2021-05-31	Mexico	CMX	CMX-INMEGEN-05-06-93	EPI_ISL_2603658	B.1.1.7	2021-05-31
Mexico|CMX-IBT_IMSS_15419-NC|EPI_ISL_2801784|B.1.1.7|2021-06-01	Mexico	CMX	CMX-IBT_IMSS_15419-NC	EPI_ISL_2801784	B.1.1.7	2021-06-01
Mexico|CMX-INMEGEN-06-01-62|EPI_ISL_2616899|B.1.1.7|2021-06-01	Mexico	CMX	CMX-INMEGEN-06-01-62	EPI_ISL_2616899	B.1.1.7	2021-06-01
Mexico|CMX-IBT_IMSS_1917|EPI_ISL_2801781|B.1.1.7|2021-06-01	Mexico	CMX	CMX-IBT_IMSS_1917	EPI_ISL_2801781	B.1.1.7	2021-06-01
Mexico|YUC-INMEGEN-06-02-333|EPI_ISL_2692817|B.1.1.7|2021-06-01	Mexico	YUC	YUC-INMEGEN-06-02-333	EPI_ISL_2692817	B.1.1.7	2021-06-01
Mexico|PUE-InDRE_FB17005_S3132|EPI_ISL_2663399|B.1.1.7|2021-06-02	Mexico	PUE	PUE-InDRE_FB17005_S3132	EPI_ISL_2663399	B.1.1.7	2021-06-02
Mexico|CMX_IBT_IMSS_1686|EPI_ISL_2681066|B.1.1.7|2021-06-03	Mexico	CMX	CMX_IBT_IMSS_1686	EPI_ISL_2681066	B.1.1.7	2021-06-03
Mexico|GRO-IBT_IMSS_1934|EPI_ISL_2801799|B.1.1.7|2021-06-03	Mexico	GRO	GRO-IBT_IMSS_1934	EPI_ISL_2801799	B.1.1.7	2021-06-03
Mexico|TAB-InDRE_FB16947_S3073|EPI_ISL_2663340|B.1.1.7|2021-06-03	Mexico	TAB	TAB-InDRE_FB16947_S3073	EPI_ISL_2663340	B.1.1.7	2021-06-03
Mexico|CMX-InDRE_FB17970_S3937|EPI_ISL_2858951|B.1.1.7|2021-06-07	Mexico	CMX	CMX-InDRE_FB17970_S3937	EPI_ISL_2858951	B.1.1.7	2021-06-07
Mexico|CMX-LANGEBIO_IMSS_1466|EPI_ISL_2942584|B.1.1.7|2021-06-07	Mexico	CMX	CMX-LANGEBIO_IMSS_1466	EPI_ISL_2942584	B.1.1.7	2021-06-07
Mexico|CMX-InDRE_FB17954_S3934|EPI_ISL_2858948|B.1.1.7|2021-06-08	Mexico	CMX	CMX-InDRE_FB17954_S3934	EPI_ISL_2858948	B.1.1.7	2021-06-08
Mexico|QUE-IBT_IMSS_1994|EPI_ISL_2801849|B.1.1.7|2021-06-08	Mexico	QUE	QUE-IBT_IMSS_1994	EPI_ISL_2801849	B.1.1.7	2021-06-08
Mexico|VER-IBT_IMSS_2043|EPI_ISL_2801887|B.1.1.7|2021-06-08	Mexico	VER	VER-IBT_IMSS_2043	EPI_ISL_2801887	B.1.1.7	2021-06-08
Mexico|PUE-InDRE_FB17750_S3521|EPI_ISL_2779036|B.1.1.7|2021-06-11	Mexico	PUE	PUE-InDRE_FB17750_S3521	EPI_ISL_2779036	B.1.1.7	2021-06-11
Mexico|TAB-INMEGEN-06-04-329|EPI_ISL_2894375|B.1.1.7|2021-06-12	Mexico	TAB	TAB-INMEGEN-06-04-329	EPI_ISL_2894375	B.1.1.7	2021-06-12
Mexico|TAB-INMEGEN-06-04-326|EPI_ISL_2894372|B.1.1.7|2021-06-12	Mexico	TAB	TAB-INMEGEN-06-04-326	EPI_ISL_2894372	B.1.1.7	2021-06-12
Mexico|VER-INMEGEN-16-338|EPI_ISL_2978643|B.1.1.7|2021-06-14	Mexico	VER	VER-INMEGEN-16-338	EPI_ISL_2978643	B.1.1.7	2021-06-14
Mexico|VER-INMEGEN-16-322|EPI_ISL_2978629|B.1.1.7|2021-06-14	Mexico	VER	VER-INMEGEN-16-322	EPI_ISL_2978629	B.1.1.7	2021-06-14
Mexico|TAB-InDRE_FB18182_S3960|EPI_ISL_2858974|B.1.1.7|2021-06-21	Mexico	TAB	TAB-InDRE_FB18182_S3960	EPI_ISL_2858974	B.1.1.7	2021-06-21
Mexico|CMX-INMEGEN-17-177|EPI_ISL_3067873|B.1.1.7|2021-06-23	Mexico	CMX	CMX-INMEGEN-17-177	EPI_ISL_3067873	B.1.1.7	2021-06-23
Mexico|CMX-INMEGEN-06-03-212|EPI_ISL_2842785|B.1.1.7|2021-06-24	Mexico	CMX	CMX-INMEGEN-06-03-212	EPI_ISL_2842785	B.1.1.7	2021-06-24
Mexico|CMX-INMEGEN-06-04-208|EPI_ISL_2894273|B.1.1.7|2021-06-25	Mexico	CMX	CMX-INMEGEN-06-04-208	EPI_ISL_2894273	B.1.1.7	2021-06-25
Mexico|QUE-InDRE_FB18359_S4142|EPI_ISL_2920713|B.1.1.7|2021-06-25	Mexico	QUE	QUE-InDRE_FB18359_S4142	EPI_ISL_2920713	B.1.1.7	2021-06-25
Mexico|MEX-LANGEBIO_IMSS_1576|EPI_ISL_2942687|B.1.1.7|2021-06-27	Mexico	MEX	MEX-LANGEBIO_IMSS_1576	EPI_ISL_2942687	B.1.1.7	2021-06-27
Mexico|TAB-InDRE_FB19079_S4492|EPI_ISL_3033346|B.1.1.7|2021-06-28	Mexico	TAB	TAB-InDRE_FB19079_S4492	EPI_ISL_3033346	B.1.1.7	2021-06-28
Mexico|TAB-InDRE_FB19078_S4491|EPI_ISL_3033345|B.1.1.7|2021-06-28	Mexico	TAB	TAB-InDRE_FB19078_S4491	EPI_ISL_3033345	B.1.1.7	2021-06-28
Mexico|PUE-LANGEBIO_IMSS_1853|EPI_ISL_2942920|B.1.1.7|2021-07-01	Mexico	PUE	PUE-LANGEBIO_IMSS_1853	EPI_ISL_2942920	B.1.1.7	2021-07-01
Mexico|MEX-INMEGEN-16-262|EPI_ISL_2978576|B.1.1.7|2021-07-05	Mexico	MEX	MEX-INMEGEN-16-262	EPI_ISL_2978576	B.1.1.7	2021-07-05
Mexico|MEX-INMEGEN-16-260|EPI_ISL_2978574|B.1.1.7|2021-07-05	Mexico	MEX	MEX-INMEGEN-16-260	EPI_ISL_2978574	B.1.1.7	2021-07-05
Mexico|MEX-INMEGEN-17-359|EPI_ISL_3067776|B.1.1.7|2021-07-13	Mexico	MEX	MEX-INMEGEN-17-359	EPI_ISL_3067776	B.1.1.7	2021-07-13

## Sheet: B_1_1_7_C5a
Name	Country	State	ID	GSAID	Lineage	Date
USA|WA-UW-67793|EPI_ISL_1497784|B.1.1.7|2021-03-19	USA	Other	WA-UW-67793	EPI_ISL_1497784	B.1.1.7	2021-03-19
USA|MN-MDH-5069|EPI_ISL_1593699|B.1.1.7|2021-04-06	USA	Other	MN-MDH-5069	EPI_ISL_1593699	B.1.1.7	2021-04-06
Mexico|YUC_INER_IMSS_00782|EPI_ISL_2091236|B.1.1.7|2021-04-08	Mexico	YUC	YUC_INER_IMSS_00782	EPI_ISL_2091236	B.1.1.7	2021-04-08
Mexico|CMX-INMEGEN-04-05-6|EPI_ISL_1711300|B.1.1.7|2021-04-12	Mexico	CMX	CMX-INMEGEN-04-05-6	EPI_ISL_1711300	B.1.1.7	2021-04-12
Mexico|ROO_LANGEBIO_IMSS_07605-NC|EPI_ISL_2970025|B.1.1.7|2021-04-17	Mexico	ROO	ROO_LANGEBIO_IMSS_07605-NC	EPI_ISL_2970025	B.1.1.7	2021-04-17
Mexico|DUR_LANGEBIO_IMSS_0551|EPI_ISL_2401974|B.1.1.7|2021-04-24	Mexico	DUR	DUR_LANGEBIO_IMSS_0551	EPI_ISL_2401974	B.1.1.7	2021-04-24
Mexico|TAB_LANGEBIO_IMSS_0647|EPI_ISL_2402064|B.1.1.7|2021-04-25	Mexico	TAB	TAB_LANGEBIO_IMSS_0647	EPI_ISL_2402064	B.1.1.7	2021-04-25
USA|MI-UM-10039477865|EPI_ISL_2100372|B.1.1.7|2021-04-27	USA	Other	MI-UM-10039477865	EPI_ISL_2100372	B.1.1.7	2021-04-27
Mexico|MEX-INMEGEN-05-01-349|EPI_ISL_2105853|B.1.1.7|2021-05-03	Mexico	MEX	MEX-INMEGEN-05-01-349	EPI_ISL_2105853	B.1.1.7	2021-05-03
Mexico|CMX-INMEGEN-INDRE-05-03-211|EPI_ISL_2319331|B.1.1.7|2021-05-07	Mexico	CMX	CMX-INMEGEN-INDRE-05-03-211	EPI_ISL_2319331	B.1.1.7	2021-05-07
Mexico|MEX-INMEGEN-05-03-72|EPI_ISL_2319229|B.1.1.7|2021-05-08	Mexico	MEX	MEX-INMEGEN-05-03-72	EPI_ISL_2319229	B.1.1.7	2021-05-08
Mexico|ROO_INER_IMSS_1162|EPI_ISL_2490347|B.1.1.7|2021-05-11	Mexico	ROO	ROO_INER_IMSS_1162	EPI_ISL_2490347	B.1.1.7	2021-05-11
Mexico|CMX-INMEGEN-05-04-78|EPI_ISL_2349941|B.1.1.7|2021-05-12	Mexico	CMX	CMX-INMEGEN-05-04-78	EPI_ISL_2349941	B.1.1.7	2021-05-12
Mexico|MEX-INMEGEN-05-04-189|EPI_ISL_2350017|B.1.1.7|2021-05-15	Mexico	MEX	MEX-INMEGEN-05-04-189	EPI_ISL_2350017	B.1.1.7	2021-05-15
Mexico|MEX-INMEGEN-05-04-204|EPI_ISL_2350027|B.1.1.7|2021-05-15	Mexico	MEX	MEX-INMEGEN-05-04-204	EPI_ISL_2350027	B.1.1.7	2021-05-15
Mexico|MEX-INMEGEN-05-04-355|EPI_ISL_2350123|B.1.1.7|2021-05-17	Mexico	MEX	MEX-INMEGEN-05-04-355	EPI_ISL_2350123	B.1.1.7	2021-05-17
Mexico|NLE-InDRE_FB16177_S2461|EPI_ISL_2455982|B.1.1.7|2021-05-17	Mexico	NLE	NLE-InDRE_FB16177_S2461	EPI_ISL_2455982	B.1.1.7	2021-05-17
Mexico|ROO-LANGEBIO_IMSS_0907|EPI_ISL_2671660|B.1.1.7|2021-05-17	Mexico	ROO	ROO-LANGEBIO_IMSS_0907	EPI_ISL_2671660	B.1.1.7	2021-05-17
Mexico|SLP-InDRE_FB16030_S2429|EPI_ISL_2455953|B.1.1.7|2021-05-17	Mexico	SLP	SLP-InDRE_FB16030_S2429	EPI_ISL_2455953	B.1.1.7	2021-05-17
Mexico|MEX-INMEGEN-05-05-205|EPI_ISL_2444522|B.1.1.7|2021-05-20	Mexico	MEX	MEX-INMEGEN-05-05-205	EPI_ISL_2444522	B.1.1.7	2021-05-20
Mexico|ROO-LANGEBIO_IMSS_0939|EPI_ISL_2671682|B.1.1.7|2021-05-20	Mexico	ROO	ROO-LANGEBIO_IMSS_0939	EPI_ISL_2671682	B.1.1.7	2021-05-20
Mexico|CMX-INMEGEN-05-06-8|EPI_ISL_2603600|B.1.1.7|2021-05-24	Mexico	CMX	CMX-INMEGEN-05-06-8	EPI_ISL_2603600	B.1.1.7	2021-05-24
Mexico|YUC-InDRE_FB16665_S2762|EPI_ISL_2533788|B.1.1.7|2021-05-24	Mexico	YUC	YUC-InDRE_FB16665_S2762	EPI_ISL_2533788	B.1.1.7	2021-05-24
Mexico|CMX-INMEGEN-05-06-279|EPI_ISL_2603748|B.1.1.7|2021-05-27	Mexico	CMX	CMX-INMEGEN-05-06-279	EPI_ISL_2603748	B.1.1.7	2021-05-27
Mexico|CMX-INMEGEN-05-06-200|EPI_ISL_2603689|B.1.1.7|2021-05-27	Mexico	CMX	CMX-INMEGEN-05-06-200	EPI_ISL_2603689	B.1.1.7	2021-05-27
Mexico|ROO_IBT_IMSS_1745|EPI_ISL_2681176|B.1.1.7|2021-05-30	Mexico	ROO	ROO_IBT_IMSS_1745	EPI_ISL_2681176	B.1.1.7	2021-05-30
Mexico|ROO-INMEGEN-06-02-320|EPI_ISL_2692807|B.1.1.7|2021-06-01	Mexico	ROO	ROO-INMEGEN-06-02-320	EPI_ISL_2692807	B.1.1.7	2021-06-01
Mexico|TAB-INMEGEN-06-02-327|EPI_ISL_2692813|B.1.1.7|2021-06-01	Mexico	TAB	TAB-INMEGEN-06-02-327	EPI_ISL_2692813	B.1.1.7	2021-06-01
Mexico|CAM-InDRE_FB17391_S3486|EPI_ISL_2779001|B.1.1.7|2021-06-02	Mexico	CAM	CAM-InDRE_FB17391_S3486	EPI_ISL_2779001	B.1.1.7	2021-06-02
Mexico|CAM_IBT_IMSS_10304-NC|EPI_ISL_2681370|B.1.1.7|2021-06-02	Mexico	CAM	CAM_IBT_IMSS_10304-NC	EPI_ISL_2681370	B.1.1.7	2021-06-02
Mexico|ROO-IBT_IMSS_1825|EPI_ISL_2801579|B.1.1.7|2021-06-02	Mexico	ROO	ROO-IBT_IMSS_1825	EPI_ISL_2801579	B.1.1.7	2021-06-02
Mexico|ROO-INMEGEN-06-01-212|EPI_ISL_2616851|B.1.1.7|2021-06-02	Mexico	ROO	ROO-INMEGEN-06-01-212	EPI_ISL_2616851	B.1.1.7	2021-06-02
Mexico|ROO-IBT_IMSS_1812|EPI_ISL_2801577|B.1.1.7|2021-06-02	Mexico	ROO	ROO-IBT_IMSS_1812	EPI_ISL_2801577	B.1.1.7	2021-06-02
Mexico|ROO-INMEGEN-06-01-268|EPI_ISL_2616994|B.1.1.7|2021-06-02	Mexico	ROO	ROO-INMEGEN-06-01-268	EPI_ISL_2616994	B.1.1.7	2021-06-02
Mexico|ROO-INMEGEN-06-01-197|EPI_ISL_2616800|B.1.1.7|2021-06-02	Mexico	ROO	ROO-INMEGEN-06-01-197	EPI_ISL_2616800	B.1.1.7	2021-06-02
Mexico|ROO-INMEGEN-06-01-309|EPI_ISL_2616841|B.1.1.7|2021-06-03	Mexico	ROO	ROO-INMEGEN-06-01-309	EPI_ISL_2616841	B.1.1.7	2021-06-03
Mexico|ROO-INMEGEN-06-01-301|EPI_ISL_2616969|B.1.1.7|2021-06-03	Mexico	ROO	ROO-INMEGEN-06-01-301	EPI_ISL_2616969	B.1.1.7	2021-06-03
Mexico|ROO-INMEGEN-06-01-342|EPI_ISL_2616963|B.1.1.7|2021-06-04	Mexico	ROO	ROO-INMEGEN-06-01-342	EPI_ISL_2616963	B.1.1.7	2021-06-04
Mexico|ROO-INMEGEN-06-02-66|EPI_ISL_2692598|B.1.1.7|2021-06-06	Mexico	ROO	ROO-INMEGEN-06-02-66	EPI_ISL_2692598	B.1.1.7	2021-06-06
Mexico|ZAC-IBT_IMSS_1821|EPI_ISL_2801697|B.1.1.7|2021-06-06	Mexico	ZAC	ZAC-IBT_IMSS_1821	EPI_ISL_2801697	B.1.1.7	2021-06-06
Mexico|CAM-IBT_IMSS_2102|EPI_ISL_2801649|B.1.1.7|2021-06-07	Mexico	CAM	CAM-IBT_IMSS_2102	EPI_ISL_2801649	B.1.1.7	2021-06-07
Mexico|ROO-INMEGEN-06-02-69|EPI_ISL_2692601|B.1.1.7|2021-06-07	Mexico	ROO	ROO-INMEGEN-06-02-69	EPI_ISL_2692601	B.1.1.7	2021-06-07
Mexico|COA-InDRE_FB17711_S4112|EPI_ISL_2920683|B.1.1.7|2021-06-08	Mexico	COA	COA-InDRE_FB17711_S4112	EPI_ISL_2920683	B.1.1.7	2021-06-08
Mexico|ROO-INMEGEN-06-02-106|EPI_ISL_2692633|B.1.1.7|2021-06-08	Mexico	ROO	ROO-INMEGEN-06-02-106	EPI_ISL_2692633	B.1.1.7	2021-06-08
Mexico|TAB-INMEGEN-06-03-343|EPI_ISL_2810298|B.1.1.7|2021-06-08	Mexico	TAB	TAB-INMEGEN-06-03-343	EPI_ISL_2810298	B.1.1.7	2021-06-08
Mexico|ROO-INMEGEN-06-03-320|EPI_ISL_2810278|B.1.1.7|2021-06-09	Mexico	ROO	ROO-INMEGEN-06-03-320	EPI_ISL_2810278	B.1.1.7	2021-06-09
Mexico|ROO-INMEGEN-06-04-7|EPI_ISL_2894157|B.1.1.7|2021-06-10	Mexico	ROO	ROO-INMEGEN-06-04-7	EPI_ISL_2894157	B.1.1.7	2021-06-10
Mexico|ROO-INMEGEN-06-04-321|EPI_ISL_2894367|B.1.1.7|2021-06-12	Mexico	ROO	ROO-INMEGEN-06-04-321	EPI_ISL_2894367	B.1.1.7	2021-06-12
Mexico|ROO-INMEGEN-17-109|EPI_ISL_3067911|B.1.1.7|2021-06-13	Mexico	ROO	ROO-INMEGEN-17-109	EPI_ISL_3067911	B.1.1.7	2021-06-13
Mexico|JAL-LANGEBIO_IMSS_1257|EPI_ISL_2942416|B.1.1.7|2021-06-15	Mexico	JAL	JAL-LANGEBIO_IMSS_1257	EPI_ISL_2942416	B.1.1.7	2021-06-15
Mexico|SLP-LANGEBIO_IMSS_1327|EPI_ISL_2942472|B.1.1.7|2021-06-16	Mexico	SLP	SLP-LANGEBIO_IMSS_1327	EPI_ISL_2942472	B.1.1.7	2021-06-16
Mexico|COA-InDRE_FB18231_S4134|EPI_ISL_2920705|B.1.1.7|2021-06-17	Mexico	COA	COA-InDRE_FB18231_S4134	EPI_ISL_2920705	B.1.1.7	2021-06-17
Mexico|SIN-LANGEBIO_IMSS_1277|EPI_ISL_2942433|B.1.1.7|2021-06-17	Mexico	SIN	SIN-LANGEBIO_IMSS_1277	EPI_ISL_2942433	B.1.1.7	2021-06-17
Mexico|JAL-LANGEBIO_IMSS_1281|EPI_ISL_2942436|B.1.1.7|2021-06-20	Mexico	JAL	JAL-LANGEBIO_IMSS_1281	EPI_ISL_2942436	B.1.1.7	2021-06-20
Mexico|CMX-INMEGEN-17-332|EPI_ISL_3067916|B.1.1.7|2021-07-16	Mexico	CMX	CMX-INMEGEN-17-332	EPI_ISL_3067916	B.1.1.7	2021-07-16

## Sheet: B_1_1_7_C6a
Name	Country	State	ID	GSAID	Lineage	Date
Mexico|YUC-NYGC-15751-21|EPI_ISL_3024024|B.1.1.7|2021-03-30	Mexico	YUC	YUC-NYGC-15751-21	EPI_ISL_3024024	B.1.1.7	2021-03-30
Mexico|ROO-InDRE_FB12917_S1492|EPI_ISL_1805470|B.1.1.7|2021-04-02	Mexico	ROO	ROO-InDRE_FB12917_S1492	EPI_ISL_1805470	B.1.1.7	2021-04-02
Mexico|ROO_INER_IMSS_00791|EPI_ISL_2091244|B.1.1.7|2021-04-08	Mexico	ROO	ROO_INER_IMSS_00791	EPI_ISL_2091244	B.1.1.7	2021-04-08
Mexico|YUC-InDRE_FB15328_S2079|EPI_ISL_2283719|B.1.1.7|2021-04-08	Mexico	YUC	YUC-InDRE_FB15328_S2079	EPI_ISL_2283719	B.1.1.7	2021-04-08
USA|RI-CDC-QDX24520522|EPI_ISL_2143086|B.1.1.7|2021-04-29	USA	Other	RI-CDC-QDX24520522	EPI_ISL_2143086	B.1.1.7	2021-04-29
Mexico|YUC-InDRE_FB16589_S2750|EPI_ISL_2533776|B.1.1.7|2021-05-18	Mexico	YUC	YUC-InDRE_FB16589_S2750	EPI_ISL_2533776	B.1.1.7	2021-05-18
Mexico|YUC-InDRE_FB16666_S2763|EPI_ISL_2533789|B.1.1.7|2021-05-25	Mexico	YUC	YUC-InDRE_FB16666_S2763	EPI_ISL_2533789	B.1.1.7	2021-05-25
Mexico|CMX-INMEGEN-05-06-280|EPI_ISL_2603749|B.1.1.7|2021-05-28	Mexico	CMX	CMX-INMEGEN-05-06-280	EPI_ISL_2603749	B.1.1.7	2021-05-28
Mexico|ROO-INMEGEN-05-06-268|EPI_ISL_2603738|B.1.1.7|2021-05-31	Mexico	ROO	ROO-INMEGEN-05-06-268	EPI_ISL_2603738	B.1.1.7	2021-05-31
Mexico|VER-INMEGEN-05-06-231|EPI_ISL_2603713|B.1.1.7|2021-05-31	Mexico	VER	VER-INMEGEN-05-06-231	EPI_ISL_2603713	B.1.1.7	2021-05-31
Mexico|VER-INMEGEN-05-06-254|EPI_ISL_2603725|B.1.1.7|2021-05-31	Mexico	VER	VER-INMEGEN-05-06-254	EPI_ISL_2603725	B.1.1.7	2021-05-31
Mexico|YUC-INMEGEN-05-06-196|EPI_ISL_2603685|B.1.1.7|2021-05-31	Mexico	YUC	YUC-INMEGEN-05-06-196	EPI_ISL_2603685	B.1.1.7	2021-05-31
Mexico|YUC-INMEGEN-05-06-222|EPI_ISL_2603706|B.1.1.7|2021-06-01	Mexico	YUC	YUC-INMEGEN-05-06-222	EPI_ISL_2603706	B.1.1.7	2021-06-01
Mexico|YUC-INMEGEN-05-06-277|EPI_ISL_2603746|B.1.1.7|2021-06-01	Mexico	YUC	YUC-INMEGEN-05-06-277	EPI_ISL_2603746	B.1.1.7	2021-06-01
Mexico|YUC-InDRE_FB17487_S3495|EPI_ISL_2779010|B.1.1.7|2021-06-01	Mexico	YUC	YUC-InDRE_FB17487_S3495	EPI_ISL_2779010	B.1.1.7	2021-06-01
Mexico|YUC-InDRE_FB17495_S3496|EPI_ISL_2779011|B.1.1.7|2021-06-01	Mexico	YUC	YUC-InDRE_FB17495_S3496	EPI_ISL_2779011	B.1.1.7	2021-06-01
Mexico|YUC-InDRE_FB17511_S3501|EPI_ISL_2779016|B.1.1.7|2021-06-02	Mexico	YUC	YUC-InDRE_FB17511_S3501	EPI_ISL_2779016	B.1.1.7	2021-06-02
Mexico|YUC-INMEGEN-06-01-271|EPI_ISL_2616910|B.1.1.7|2021-06-02	Mexico	YUC	YUC-INMEGEN-06-01-271	EPI_ISL_2616910	B.1.1.7	2021-06-02
Mexico|YUC-INMEGEN-06-01-330|EPI_ISL_2616970|B.1.1.7|2021-06-03	Mexico	YUC	YUC-INMEGEN-06-01-330	EPI_ISL_2616970	B.1.1.7	2021-06-03
Mexico|YUC-INMEGEN-06-01-299|EPI_ISL_2616968|B.1.1.7|2021-06-03	Mexico	YUC	YUC-INMEGEN-06-01-299	EPI_ISL_2616968	B.1.1.7	2021-06-03
Mexico|YUC_IBT_IMSS_10287-NC|EPI_ISL_2681375|B.1.1.7|2021-06-03	Mexico	YUC	YUC_IBT_IMSS_10287-NC	EPI_ISL_2681375	B.1.1.7	2021-06-03
Mexico|YUC-INMEGEN-06-01-319|EPI_ISL_2616984|B.1.1.7|2021-06-04	Mexico	YUC	YUC-INMEGEN-06-01-319	EPI_ISL_2616984	B.1.1.7	2021-06-04
Mexico|YUC-INMEGEN-06-02-88|EPI_ISL_2692618|B.1.1.7|2021-06-05	Mexico	YUC	YUC-INMEGEN-06-02-88	EPI_ISL_2692618	B.1.1.7	2021-06-05
Mexico|YUC-INMEGEN-06-02-18|EPI_ISL_2692555|B.1.1.7|2021-06-05	Mexico	YUC	YUC-INMEGEN-06-02-18	EPI_ISL_2692555	B.1.1.7	2021-06-05
Mexico|YUC-INMEGEN-06-02-65|EPI_ISL_2692597|B.1.1.7|2021-06-05	Mexico	YUC	YUC-INMEGEN-06-02-65	EPI_ISL_2692597	B.1.1.7	2021-06-05
Mexico|YUC-IBT_IMSS_2048|EPI_ISL_2801601|B.1.1.7|2021-06-05	Mexico	YUC	YUC-IBT_IMSS_2048	EPI_ISL_2801601	B.1.1.7	2021-06-05
Mexico|YUC-IBT_IMSS_2027|EPI_ISL_2801600|B.1.1.7|2021-06-05	Mexico	YUC	YUC-IBT_IMSS_2027	EPI_ISL_2801600	B.1.1.7	2021-06-05
Mexico|YUC-INMEGEN-06-02-67|EPI_ISL_2692599|B.1.1.7|2021-06-06	Mexico	YUC	YUC-INMEGEN-06-02-67	EPI_ISL_2692599	B.1.1.7	2021-06-06
Mexico|YUC-INMEGEN-06-02-136|EPI_ISL_2692657|B.1.1.7|2021-06-07	Mexico	YUC	YUC-INMEGEN-06-02-136	EPI_ISL_2692657	B.1.1.7	2021-06-07
Mexico|YUC-INMEGEN-06-02-160|EPI_ISL_2692676|B.1.1.7|2021-06-07	Mexico	YUC	YUC-INMEGEN-06-02-160	EPI_ISL_2692676	B.1.1.7	2021-06-07
Mexico|YUC-INMEGEN-06-02-184|EPI_ISL_2692697|B.1.1.7|2021-06-07	Mexico	YUC	YUC-INMEGEN-06-02-184	EPI_ISL_2692697	B.1.1.7	2021-06-07
Mexico|YUC-InDRE_FB17561_S3505|EPI_ISL_2779020|B.1.1.7|2021-06-07	Mexico	YUC	YUC-InDRE_FB17561_S3505	EPI_ISL_2779020	B.1.1.7	2021-06-07
Mexico|MEX-LANGEBIO_IMSS_1479|EPI_ISL_2942596|B.1.1.7|2021-06-08	Mexico	MEX	MEX-LANGEBIO_IMSS_1479	EPI_ISL_2942596	B.1.1.7	2021-06-08
Mexico|VER-INMEGEN-06-02-173|EPI_ISL_2692689|B.1.1.7|2021-06-08	Mexico	VER	VER-INMEGEN-06-02-173	EPI_ISL_2692689	B.1.1.7	2021-06-08
Mexico|YUC-INMEGEN-06-02-116|EPI_ISL_2692641|B.1.1.7|2021-06-08	Mexico	YUC	YUC-INMEGEN-06-02-116	EPI_ISL_2692641	B.1.1.7	2021-06-08
Mexico|YUC-INMEGEN-06-02-165|EPI_ISL_2692681|B.1.1.7|2021-06-08	Mexico	YUC	YUC-INMEGEN-06-02-165	EPI_ISL_2692681	B.1.1.7	2021-06-08
Mexico|YUC-INMEGEN-06-02-141|EPI_ISL_2692662|B.1.1.7|2021-06-08	Mexico	YUC	YUC-INMEGEN-06-02-141	EPI_ISL_2692662	B.1.1.7	2021-06-08
Mexico|YUC-InDRE_FB17570_S3506|EPI_ISL_2779021|B.1.1.7|2021-06-08	Mexico	YUC	YUC-InDRE_FB17570_S3506	EPI_ISL_2779021	B.1.1.7	2021-06-08
Mexico|VER-INMEGEN-06-02-374|EPI_ISL_2692850|B.1.1.7|2021-06-09	Mexico	VER	VER-INMEGEN-06-02-374	EPI_ISL_2692850	B.1.1.7	2021-06-09
Mexico|YUC-INMEGEN-06-04-43|EPI_ISL_2894187|B.1.1.7|2021-06-09	Mexico	YUC	YUC-INMEGEN-06-04-43	EPI_ISL_2894187	B.1.1.7	2021-06-09
Mexico|VER-InDRE_FB17431_S3930|EPI_ISL_2858944|B.1.1.7|2021-06-12	Mexico	VER	VER-InDRE_FB17431_S3930	EPI_ISL_2858944	B.1.1.7	2021-06-12
Mexico|YUC-INMEGEN-06-04-310|EPI_ISL_2894357|B.1.1.7|2021-06-12	Mexico	YUC	YUC-INMEGEN-06-04-310	EPI_ISL_2894357	B.1.1.7	2021-06-12
Mexico|YUC-INMEGEN-06-04-299|EPI_ISL_2894346|B.1.1.7|2021-06-12	Mexico	YUC	YUC-INMEGEN-06-04-299	EPI_ISL_2894346	B.1.1.7	2021-06-12
Mexico|YUC-INMEGEN-06-04-338|EPI_ISL_2894382|B.1.1.7|2021-06-12	Mexico	YUC	YUC-INMEGEN-06-04-338	EPI_ISL_2894382	B.1.1.7	2021-06-12
Mexico|VER-INMEGEN-17-108|EPI_ISL_3067910|B.1.1.7|2021-06-13	Mexico	VER	VER-INMEGEN-17-108	EPI_ISL_3067910	B.1.1.7	2021-06-13
Mexico|VER-INMEGEN-16-284|EPI_ISL_2978595|B.1.1.7|2021-06-14	Mexico	VER	VER-INMEGEN-16-284	EPI_ISL_2978595	B.1.1.7	2021-06-14
Mexico|YUC-INMEGEN-17-118|EPI_ISL_3067917|B.1.1.7|2021-06-14	Mexico	YUC	YUC-INMEGEN-17-118	EPI_ISL_3067917	B.1.1.7	2021-06-14
Mexico|YUC-INMEGEN-17-115|EPI_ISL_3067912|B.1.1.7|2021-06-14	Mexico	YUC	YUC-INMEGEN-17-115	EPI_ISL_3067912	B.1.1.7	2021-06-14
Mexico|YUC-InDRE_FB18966_S4483|EPI_ISL_3033337|B.1.1.7|2021-06-15	Mexico	YUC	YUC-InDRE_FB18966_S4483	EPI_ISL_3033337	B.1.1.7	2021-06-15
Mexico|YUC-InDRE_FB18962_S4482|EPI_ISL_3033336|B.1.1.7|2021-06-15	Mexico	YUC	YUC-InDRE_FB18962_S4482	EPI_ISL_3033336	B.1.1.7	2021-06-15
Mexico|YUC-INMEGEN-16-357|EPI_ISL_2978661|B.1.1.7|2021-06-16	Mexico	YUC	YUC-INMEGEN-16-357	EPI_ISL_2978661	B.1.1.7	2021-06-16
Mexico|CAM-LANGEBIO_IMSS_1228|EPI_ISL_2942389|B.1.1.7|2021-06-21	Mexico	CAM	CAM-LANGEBIO_IMSS_1228	EPI_ISL_2942389	B.1.1.7	2021-06-21
Mexico|YUC-InDRE_FB19002_S4485|EPI_ISL_3033339|B.1.1.7|2021-06-22	Mexico	YUC	YUC-InDRE_FB19002_S4485	EPI_ISL_3033339	B.1.1.7	2021-06-22
Mexico|ROO-INMEGEN-16-319|EPI_ISL_2978626|B.1.1.7|2021-06-23	Mexico	ROO	ROO-INMEGEN-16-319	EPI_ISL_2978626	B.1.1.7	2021-06-23
Mexico|VER-INMEGEN-17-191|EPI_ISL_3067747|B.1.1.7|2021-06-23	Mexico	VER	VER-INMEGEN-17-191	EPI_ISL_3067747	B.1.1.7	2021-06-23
Mexico|VER-INMEGEN-17-185|EPI_ISL_3067915|B.1.1.7|2021-06-23	Mexico	VER	VER-INMEGEN-17-185	EPI_ISL_3067915	B.1.1.7	2021-06-23
Mexico|HID-InDRE_FB19139_S4498|EPI_ISL_3033352|B.1.1.7|2021-06-25	Mexico	HID	HID-InDRE_FB19139_S4498	EPI_ISL_3033352	B.1.1.7	2021-06-25
Mexico|YUC-LANGEBIO_IMSS_1562|EPI_ISL_2942673|B.1.1.7|2021-06-28	Mexico	YUC	YUC-LANGEBIO_IMSS_1562	EPI_ISL_2942673	B.1.1.7	2021-06-28
USA|MA-CDCBI-CRSP_5WALZTDKS2JJLLGP|EPI_ISL_3007330|B.1.1.7|2021-07-02	USA	Other	MA-CDCBI-CRSP_5WALZTDKS2JJLLGP	EPI_ISL_3007330	B.1.1.7	2021-07-02
USA|MA-CDCBI-CRSP_XBLM5EEDFJPWVVKH|EPI_ISL_3084992|B.1.1.7|2021-07-11	USA	Other	MA-CDCBI-CRSP_XBLM5EEDFJPWVVKH	EPI_ISL_3084992	B.1.1.7	2021-07-11

## Sheet: B_1_1_7_C7a
Name	Country	State	ID	GSAID	Lineage	Date
USA|VA-CDC-LC0020672|EPI_ISL_1298321|B.1.1.7|2021-02-24	USA	Other	VA-CDC-LC0020672	EPI_ISL_1298321	B.1.1.7	2021-02-24
USA|OH-CDC-QDX22784469|EPI_ISL_1494016|B.1.1.7|2021-03-09	USA	Other	OH-CDC-QDX22784469	EPI_ISL_1494016	B.1.1.7	2021-03-09
USA|TX-HMH-MCoV-32515|EPI_ISL_2191149|B.1.1.7|2021-03-09	USA	Other	TX-HMH-MCoV-32515	EPI_ISL_2191149	B.1.1.7	2021-03-09
Mexico|TAM-InDRE_F11757_S901|EPI_ISL_1423511|B.1.1.7|2021-03-10	Mexico	TAM	TAM-InDRE_F11757_S901	EPI_ISL_1423511	B.1.1.7	2021-03-10
USA|CO-CDPHE-2100600331|EPI_ISL_1539315|B.1.1.7|2021-03-11	USA	Other	CO-CDPHE-2100600331	EPI_ISL_1539315	B.1.1.7	2021-03-11
USA|TX-HMH-MCoV-32211|EPI_ISL_2190845|B.1.1.7|2021-03-12	USA	Other	TX-HMH-MCoV-32211	EPI_ISL_2190845	B.1.1.7	2021-03-12
USA|FL-CDC-QDX22979864|EPI_ISL_1551700|B.1.1.7|2021-03-16	USA	Other	FL-CDC-QDX22979864	EPI_ISL_1551700	B.1.1.7	2021-03-16
USA|TX-CDC-ASC210008085|EPI_ISL_1561687|B.1.1.7|2021-03-16	USA	Other	TX-CDC-ASC210008085	EPI_ISL_1561687	B.1.1.7	2021-03-16
USA|CO-CDPHE-2100677333|EPI_ISL_1539509|B.1.1.7|2021-03-17	USA	Other	CO-CDPHE-2100677333	EPI_ISL_1539509	B.1.1.7	2021-03-17
Mexico|CMX_INER_IMSS_00652|EPI_ISL_1585647|B.1.1.7|2021-03-21	Mexico	CMX	CMX_INER_IMSS_00652	EPI_ISL_1585647	B.1.1.7	2021-03-21
USA|TX-HMH-MCoV-35787|EPI_ISL_2201240|B.1.1.7|2021-03-21	USA	Other	TX-HMH-MCoV-35787	EPI_ISL_2201240	B.1.1.7	2021-03-21
USA|GA-CDC-ASC210014542|EPI_ISL_1551097|B.1.1.7|2021-03-22	USA	Other	GA-CDC-ASC210014542	EPI_ISL_1551097	B.1.1.7	2021-03-22
USA|TX-HMH-MCoV-36186|EPI_ISL_2201501|B.1.1.7|2021-03-23	USA	Other	TX-HMH-MCoV-36186	EPI_ISL_2201501	B.1.1.7	2021-03-23
USA|NY-PRL-2021_03_29_01H20|EPI_ISL_1470836|B.1.1.7|2021-03-24	USA	Other	NY-PRL-2021_03_29_01H20	EPI_ISL_1470836	B.1.1.7	2021-03-24
USA|CO-CDPHE-2100698208|EPI_ISL_1539938|B.1.1.7|2021-03-25	USA	Other	CO-CDPHE-2100698208	EPI_ISL_1539938	B.1.1.7	2021-03-25
USA|CO-CDPHE-2100708630|EPI_ISL_2194854|B.1.1.7|2021-03-26	USA	Other	CO-CDPHE-2100708630	EPI_ISL_2194854	B.1.1.7	2021-03-26
USA|WA-CDC-LC0035379|EPI_ISL_1550321|B.1.1.7|2021-03-26	USA	Other	WA-CDC-LC0035379	EPI_ISL_1550321	B.1.1.7	2021-03-26
USA|MN-CDC-IBX361089601543|EPI_ISL_1694339|B.1.1.7|2021-03-30	USA	Other	MN-CDC-IBX361089601543	EPI_ISL_1694339	B.1.1.7	2021-03-30
USA|CA-CDC-ASC210039655|EPI_ISL_1834831|B.1.1.7|2021-03-31	USA	Other	CA-CDC-ASC210039655	EPI_ISL_1834831	B.1.1.7	2021-03-31
Mexico|GUA-InDRE_F12716_S1202|EPI_ISL_1626809|B.1.1.7|2021-04-02	Mexico	GUA	GUA-InDRE_F12716_S1202	EPI_ISL_1626809	B.1.1.7	2021-04-02
USA|MD-HP03802|EPI_ISL_1468609|B.1.1.7|2021-04-02	USA	Other	MD-HP03802	EPI_ISL_1468609	B.1.1.7	2021-04-02
USA|TX-CDC-LC0044101|EPI_ISL_1684969|B.1.1.7|2021-04-04	USA	Other	TX-CDC-LC0044101	EPI_ISL_1684969	B.1.1.7	2021-04-04
Mexico|NLE-InDRE_FB13201_S1495|EPI_ISL_1805473|B.1.1.7|2021-04-05	Mexico	NLE	NLE-InDRE_FB13201_S1495	EPI_ISL_1805473	B.1.1.7	2021-04-05
USA|MN-CDC-ASC210046124|EPI_ISL_1690154|B.1.1.7|2021-04-05	USA	Other	MN-CDC-ASC210046124	EPI_ISL_1690154	B.1.1.7	2021-04-05
USA|TX-CDC-QDX23654612|EPI_ISL_1668463|B.1.1.7|2021-04-05	USA	Other	TX-CDC-QDX23654612	EPI_ISL_1668463	B.1.1.7	2021-04-05
USA|ND-NDDH-0736|EPI_ISL_1919765|B.1.1.7|2021-04-06	USA	Other	ND-NDDH-0736	EPI_ISL_1919765	B.1.1.7	2021-04-06
USA|NY-PRL-2021_0408_00P02|EPI_ISL_1543896|B.1.1.7|2021-04-06	USA	Other	NY-PRL-2021_0408_00P02	EPI_ISL_1543896	B.1.1.7	2021-04-06
Mexico|TAM_IBT_IMSS_1373|EPI_ISL_2391732|B.1.1.7|2021-04-06	Mexico	TAM	TAM_IBT_IMSS_1373	EPI_ISL_2391732	B.1.1.7	2021-04-06
USA|MI-CDC-STM-000052233|EPI_ISL_1797255|B.1.1.7|2021-04-07	USA	Other	MI-CDC-STM-000052233	EPI_ISL_1797255	B.1.1.7	2021-04-07
USA|MO-MSPHL-000914|EPI_ISL_2035525|B.1.1.7|2021-04-07	USA	Other	MO-MSPHL-000914	EPI_ISL_2035525	B.1.1.7	2021-04-07
USA|WA-UW-2021040821118|EPI_ISL_1680406|B.1.1.7|2021-04-08	USA	Other	WA-UW-2021040821118	EPI_ISL_1680406	B.1.1.7	2021-04-08
USA|NY-Wadsworth-21044109-01|EPI_ISL_1855111|B.1.1.7|2021-04-09	USA	Other	NY-Wadsworth-21044109-01	EPI_ISL_1855111	B.1.1.7	2021-04-09
USA|OH-CDC-QDX23804298|EPI_ISL_1753112|B.1.1.7|2021-04-09	USA	Other	OH-CDC-QDX23804298	EPI_ISL_1753112	B.1.1.7	2021-04-09
USA|MD-HP04547|EPI_ISL_1662991|B.1.1.7|2021-04-10	USA	Other	MD-HP04547	EPI_ISL_1662991	B.1.1.7	2021-04-10
USA|MT-CDC-ASC210057378|EPI_ISL_1997837|B.1.1.7|2021-04-10	USA	Other	MT-CDC-ASC210057378	EPI_ISL_1997837	B.1.1.7	2021-04-10
Mexico|NLE_INER_IMSS_00746|EPI_ISL_2091201|B.1.1.7|2021-04-12	Mexico	NLE	NLE_INER_IMSS_00746	EPI_ISL_2091201	B.1.1.7	2021-04-12
USA|CA-CDC-LC0045069|EPI_ISL_1799001|B.1.1.7|2021-04-12	USA	Other	CA-CDC-LC0045069	EPI_ISL_1799001	B.1.1.7	2021-04-12
USA|TX-CDC-QDX23892563|EPI_ISL_1834265|B.1.1.7|2021-04-12	USA	Other	TX-CDC-QDX23892563	EPI_ISL_1834265	B.1.1.7	2021-04-12
USA|LA-EVTL2496|EPI_ISL_1960976|B.1.1.7|2021-04-13	USA	Other	LA-EVTL2496	EPI_ISL_1960976	B.1.1.7	2021-04-13
USA|MD-IGS-012110306352A|EPI_ISL_2161465|B.1.1.7|2021-04-13	USA	Other	MD-IGS-012110306352A	EPI_ISL_2161465	B.1.1.7	2021-04-13
USA|TX-HMH-MCoV-42225|EPI_ISL_2221571|B.1.1.7|2021-04-13	USA	Other	TX-HMH-MCoV-42225	EPI_ISL_2221571	B.1.1.7	2021-04-13
USA|TX-HMH-MCoV-42256|EPI_ISL_2221451|B.1.1.7|2021-04-13	USA	Other	TX-HMH-MCoV-42256	EPI_ISL_2221451	B.1.1.7	2021-04-13
Mexico|NLE_INER_IMSS_00765|EPI_ISL_2091219|B.1.1.7|2021-04-15	Mexico	NLE	NLE_INER_IMSS_00765	EPI_ISL_2091219	B.1.1.7	2021-04-15
USA|IN-CDC-STM-000058033|EPI_ISL_1924121|B.1.1.7|2021-04-15	USA	Other	IN-CDC-STM-000058033	EPI_ISL_1924121	B.1.1.7	2021-04-15
Mexico|TAM-InDRE_FB14042_S2071|EPI_ISL_2283711|B.1.1.7|2021-04-15	Mexico	TAM	TAM-InDRE_FB14042_S2071	EPI_ISL_2283711	B.1.1.7	2021-04-15
Mexico|YUC_LANGEBIO_IMSS_0596|EPI_ISL_2402015|B.1.1.7|2021-04-15	Mexico	YUC	YUC_LANGEBIO_IMSS_0596	EPI_ISL_2402015	B.1.1.7	2021-04-15
Mexico|CMX-INMEGEN-InDRE-04-06-182|EPI_ISL_1810915|B.1.1.7|2021-04-17	Mexico	CMX	CMX-INMEGEN-InDRE-04-06-182	EPI_ISL_1810915	B.1.1.7	2021-04-17
Mexico|COA_LANGEBIO_IMSS_0592|EPI_ISL_2402011|B.1.1.7|2021-04-17	Mexico	COA	COA_LANGEBIO_IMSS_0592	EPI_ISL_2402011	B.1.1.7	2021-04-17
Mexico|CMX-INER-IBT-0191|EPI_ISL_2346449|B.1.1.7|2021-04-18	Mexico	CMX	CMX-INER-IBT-0191	EPI_ISL_2346449	B.1.1.7	2021-04-18
Mexico|NLE_LANGEBIO_IMSS_0504|EPI_ISL_2401933|B.1.1.7|2021-04-20	Mexico	NLE	NLE_LANGEBIO_IMSS_0504	EPI_ISL_2401933	B.1.1.7	2021-04-20
Mexico|OAX_LANGEBIO_IMSS_0779|EPI_ISL_2402190|B.1.1.7|2021-04-20	Mexico	OAX	OAX_LANGEBIO_IMSS_0779	EPI_ISL_2402190	B.1.1.7	2021-04-20
USA|NC-CDC-LC0050476|EPI_ISL_1926702|B.1.1.7|2021-04-20	USA	Other	NC-CDC-LC0050476	EPI_ISL_1926702	B.1.1.7	2021-04-20
Mexico|TAM-InDRE_FB14054_S2075|EPI_ISL_2283715|B.1.1.7|2021-04-20	Mexico	TAM	TAM-InDRE_FB14054_S2075	EPI_ISL_2283715	B.1.1.7	2021-04-20
USA|MD-IGS-012111105030A|EPI_ISL_2319434|B.1.1.7|2021-04-21	USA	Other	MD-IGS-012111105030A	EPI_ISL_2319434	B.1.1.7	2021-04-21
Mexico|COA_LANGEBIO_IMSS_0535|EPI_ISL_2401962|B.1.1.7|2021-04-22	Mexico	COA	COA_LANGEBIO_IMSS_0535	EPI_ISL_2401962	B.1.1.7	2021-04-22
Mexico|NLE_LANGEBIO_IMSS_0520|EPI_ISL_2401947|B.1.1.7|2021-04-22	Mexico	NLE	NLE_LANGEBIO_IMSS_0520	EPI_ISL_2401947	B.1.1.7	2021-04-22
USA|MD-CDC-LC0050811|EPI_ISL_1927161|B.1.1.7|2021-04-22	USA	Other	MD-CDC-LC0050811	EPI_ISL_1927161	B.1.1.7	2021-04-22
USA|TX-HMH-MCoV-43076|EPI_ISL_2224636|B.1.1.7|2021-04-22	USA	Other	TX-HMH-MCoV-43076	EPI_ISL_2224636	B.1.1.7	2021-04-22
USA|TX-CDC-FG-029953|EPI_ISL_2043604|B.1.1.7|2021-04-22	USA	Other	TX-CDC-FG-029953	EPI_ISL_2043604	B.1.1.7	2021-04-22
Mexico|CHH_LANGEBIO_IMSS_0572|EPI_ISL_2401992|B.1.1.7|2021-04-23	Mexico	CHH	CHH_LANGEBIO_IMSS_0572	EPI_ISL_2401992	B.1.1.7	2021-04-23
USA|FL-CDC-ASC210031722|EPI_ISL_2187538|B.1.1.7|2021-04-23	USA	Other	FL-CDC-ASC210031722	EPI_ISL_2187538	B.1.1.7	2021-04-23
Mexico|NLE_LANGEBIO_IMSS_0538|EPI_ISL_2401965|B.1.1.7|2021-04-24	Mexico	NLE	NLE_LANGEBIO_IMSS_0538	EPI_ISL_2401965	B.1.1.7	2021-04-24
USA|TX-HMH-MCoV-43059|EPI_ISL_2224619|B.1.1.7|2021-04-24	USA	Other	TX-HMH-MCoV-43059	EPI_ISL_2224619	B.1.1.7	2021-04-24
Mexico|COA-InDRE_FB14127_S1762|EPI_ISL_2101901|B.1.1.7|2021-04-25	Mexico	COA	COA-InDRE_FB14127_S1762	EPI_ISL_2101901	B.1.1.7	2021-04-25
USA|MD-HP05324|EPI_ISL_2274163|B.1.1.7|2021-04-25	USA	Other	MD-HP05324	EPI_ISL_2274163	B.1.1.7	2021-04-25
USA|IL-S21WGS1197|EPI_ISL_1938592|B.1.1.7|2021-04-26	USA	Other	IL-S21WGS1197	EPI_ISL_1938592	B.1.1.7	2021-04-26
USA|KS-CDC-2-4331890|EPI_ISL_2105165|B.1.1.7|2021-04-26	USA	Other	KS-CDC-2-4331890	EPI_ISL_2105165	B.1.1.7	2021-04-26
USA|CO-CDPHE-2100957165|EPI_ISL_2309218|B.1.1.7|2021-04-27	USA	Other	CO-CDPHE-2100957165	EPI_ISL_2309218	B.1.1.7	2021-04-27
Mexico|PUE-InDRE_FB16502_S2472|EPI_ISL_2455993|B.1.1.7|2021-04-27	Mexico	PUE	PUE-InDRE_FB16502_S2472	EPI_ISL_2455993	B.1.1.7	2021-04-27
Mexico|TAM-InDRE_FB14700_S2045|EPI_ISL_2283687|B.1.1.7|2021-04-27	Mexico	TAM	TAM-InDRE_FB14700_S2045	EPI_ISL_2283687	B.1.1.7	2021-04-27
Mexico|NLE_LANGEBIO_IMSS_0568|EPI_ISL_2401990|B.1.1.7|2021-04-28	Mexico	NLE	NLE_LANGEBIO_IMSS_0568	EPI_ISL_2401990	B.1.1.7	2021-04-28
USA|LA-CDC-ASC210037141|EPI_ISL_2145828|B.1.1.7|2021-04-29	USA	Other	LA-CDC-ASC210037141	EPI_ISL_2145828	B.1.1.7	2021-04-29
USA|CO-CDC-MMB08587572|EPI_ISL_2372489|B.1.1.7|2021-04-30	USA	Other	CO-CDC-MMB08587572	EPI_ISL_2372489	B.1.1.7	2021-04-30
USA|OR-OHSU-11678|EPI_ISL_2462307|B.1.1.7|2021-04-30	USA	Other	OR-OHSU-11678	EPI_ISL_2462307	B.1.1.7	2021-04-30
Mexico|CMX-INMEGEN-05-01-319|EPI_ISL_2105826|B.1.1.7|2021-05-01	Mexico	CMX	CMX-INMEGEN-05-01-319	EPI_ISL_2105826	B.1.1.7	2021-05-01
USA|AZ-ASU5273|EPI_ISL_2153619|B.1.1.7|2021-05-01	USA	Other	AZ-ASU5273	EPI_ISL_2153619	B.1.1.7	2021-05-01
USA|CO-CDC-ASC210037626|EPI_ISL_2148290|B.1.1.7|2021-05-01	USA	Other	CO-CDC-ASC210037626	EPI_ISL_2148290	B.1.1.7	2021-05-01
USA|TX-CDC-QDX24758258|EPI_ISL_2268635|B.1.1.7|2021-05-01	USA	Other	TX-CDC-QDX24758258	EPI_ISL_2268635	B.1.1.7	2021-05-01
Mexico|HID-INMEGEN-05-02-179|EPI_ISL_2230885|B.1.1.7|2021-05-02	Mexico	HID	HID-INMEGEN-05-02-179	EPI_ISL_2230885	B.1.1.7	2021-05-02
Mexico|NLE_INER_IMSS_1018|EPI_ISL_2490337|B.1.1.7|2021-05-02	Mexico	NLE	NLE_INER_IMSS_1018	EPI_ISL_2490337	B.1.1.7	2021-05-02
Mexico|TAB_INER_IMSS_1124|EPI_ISL_2490346|B.1.1.7|2021-05-02	Mexico	TAB	TAB_INER_IMSS_1124	EPI_ISL_2490346	B.1.1.7	2021-05-02
Mexico|MEX-INMEGEN-05-01-366|EPI_ISL_2105867|B.1.1.7|2021-05-03	Mexico	MEX	MEX-INMEGEN-05-01-366	EPI_ISL_2105867	B.1.1.7	2021-05-03
USA|CO-CDC-MMB08625197|EPI_ISL_2382142|B.1.1.7|2021-05-03	USA	Other	CO-CDC-MMB08625197	EPI_ISL_2382142	B.1.1.7	2021-05-03
USA|CO-CDC-MMB08624799|EPI_ISL_2382105|B.1.1.7|2021-05-03	USA	Other	CO-CDC-MMB08624799	EPI_ISL_2382105	B.1.1.7	2021-05-03
USA|NC-CDC-ASC210058897|EPI_ISL_2147193|B.1.1.7|2021-05-03	USA	Other	NC-CDC-ASC210058897	EPI_ISL_2147193	B.1.1.7	2021-05-03
USA|RI-CDCBI-CRSP_2G6EE776M37O6ZJF|EPI_ISL_2096722|B.1.1.7|2021-05-03	USA	Other	RI-CDCBI-CRSP_2G6EE776M37O6ZJF	EPI_ISL_2096722	B.1.1.7	2021-05-03
USA|TX-CDC-QDX24603568|EPI_ISL_2248465|B.1.1.7|2021-05-04	USA	Other	TX-CDC-QDX24603568	EPI_ISL_2248465	B.1.1.7	2021-05-04
Mexico|TAM-InDRE_FB14930_S2051|EPI_ISL_2283693|B.1.1.7|2021-05-04	Mexico	TAM	TAM-InDRE_FB14930_S2051	EPI_ISL_2283693	B.1.1.7	2021-05-04
Mexico|MEX-INMEGEN-05-03-292|EPI_ISL_2319385|B.1.1.7|2021-05-05	Mexico	MEX	MEX-INMEGEN-05-03-292	EPI_ISL_2319385	B.1.1.7	2021-05-05
USA|ND-NDDH-01555|EPI_ISL_2339998|B.1.1.7|2021-05-05	USA	Other	ND-NDDH-01555	EPI_ISL_2339998	B.1.1.7	2021-05-05
USA|TX-DSHS-6637|EPI_ISL_2334069|B.1.1.7|2021-05-05	USA	Other	TX-DSHS-6637	EPI_ISL_2334069	B.1.1.7	2021-05-05
Mexico|QUE-InDRE_FB15777_S2383|EPI_ISL_2455908|B.1.1.7|2021-05-05	Mexico	QUE	QUE-InDRE_FB15777_S2383	EPI_ISL_2455908	B.1.1.7	2021-05-05
Mexico|TAM-InDRE_FB14936_S2591|EPI_ISL_2492487|B.1.1.7|2021-05-05	Mexico	TAM	TAM-InDRE_FB14936_S2591	EPI_ISL_2492487	B.1.1.7	2021-05-05
Mexico|PUE_IBT_IMSS_1252|EPI_ISL_2391628|B.1.1.7|2021-05-06	Mexico	PUE	PUE_IBT_IMSS_1252	EPI_ISL_2391628	B.1.1.7	2021-05-06
Mexico|PUE_IBT_IMSS_1254|EPI_ISL_2391580|B.1.1.7|2021-05-06	Mexico	PUE	PUE_IBT_IMSS_1254	EPI_ISL_2391580	B.1.1.7	2021-05-06
Mexico|CMX-InDRE_FD64177_S2066|EPI_ISL_2283706|B.1.1.7|2021-05-07	Mexico	CMX	CMX-InDRE_FD64177_S2066	EPI_ISL_2283706	B.1.1.7	2021-05-07
Mexico|MEX-INMEGEN-05-03-15|EPI_ISL_2319183|B.1.1.7|2021-05-07	Mexico	MEX	MEX-INMEGEN-05-03-15	EPI_ISL_2319183	B.1.1.7	2021-05-07
Mexico|MEX-INMEGEN-05-03-4|EPI_ISL_2319174|B.1.1.7|2021-05-07	Mexico	MEX	MEX-INMEGEN-05-03-4	EPI_ISL_2319174	B.1.1.7	2021-05-07
Mexico|MEX-INMEGEN-05-03-43|EPI_ISL_2319202|B.1.1.7|2021-05-07	Mexico	MEX	MEX-INMEGEN-05-03-43	EPI_ISL_2319202	B.1.1.7	2021-05-07
USA|TX-CDC-ASC210060488|EPI_ISL_2147546|B.1.1.7|2021-05-07	USA	Other	TX-CDC-ASC210060488	EPI_ISL_2147546	B.1.1.7	2021-05-07
Mexico|TAM-InDRE_FB15937_S2399|EPI_ISL_2455924|B.1.1.7|2021-05-07	Mexico	TAM	TAM-InDRE_FB15937_S2399	EPI_ISL_2455924	B.1.1.7	2021-05-07
Mexico|TAM-InDRE_FB15938_S2400|EPI_ISL_2455925|B.1.1.7|2021-05-07	Mexico	TAM	TAM-InDRE_FB15938_S2400	EPI_ISL_2455925	B.1.1.7	2021-05-07
Mexico|TAM-InDRE_FB15943_S2407|EPI_ISL_2455931|B.1.1.7|2021-05-07	Mexico	TAM	TAM-InDRE_FB15943_S2407	EPI_ISL_2455931	B.1.1.7	2021-05-07
Mexico|CMX-INMEGEN-05-03-54|EPI_ISL_2319213|B.1.1.7|2021-05-08	Mexico	CMX	CMX-INMEGEN-05-03-54	EPI_ISL_2319213	B.1.1.7	2021-05-08
Mexico|COA_INER_IMSS_1085|EPI_ISL_2490340|B.1.1.7|2021-05-08	Mexico	COA	COA_INER_IMSS_1085	EPI_ISL_2490340	B.1.1.7	2021-05-08
USA|MA-CDCBI-CRSP_7OFO4G7MGJTY6WMD|EPI_ISL_2103927|B.1.1.7|2021-05-08	USA	Other	MA-CDCBI-CRSP_7OFO4G7MGJTY6WMD	EPI_ISL_2103927	B.1.1.7	2021-05-08
Mexico|TAM-InDRE_FB15955_S2409|EPI_ISL_2455933|B.1.1.7|2021-05-08	Mexico	TAM	TAM-InDRE_FB15955_S2409	EPI_ISL_2455933	B.1.1.7	2021-05-08
Mexico|TAM-InDRE_FB15942_S2406|EPI_ISL_2455930|B.1.1.7|2021-05-08	Mexico	TAM	TAM-InDRE_FB15942_S2406	EPI_ISL_2455930	B.1.1.7	2021-05-08
USA|CO-CDPHE-2101055109|EPI_ISL_2310222|B.1.1.7|2021-05-09	USA	Other	CO-CDPHE-2101055109	EPI_ISL_2310222	B.1.1.7	2021-05-09
USA|IN-CDC-LC0060567|EPI_ISL_2305782|B.1.1.7|2021-05-09	USA	Other	IN-CDC-LC0060567	EPI_ISL_2305782	B.1.1.7	2021-05-09
USA|TX-CDC-FG-034411|EPI_ISL_2269387|B.1.1.7|2021-05-09	USA	Other	TX-CDC-FG-034411	EPI_ISL_2269387	B.1.1.7	2021-05-09
Mexico|PUE-InDRE_FB16507_S2473|EPI_ISL_2455994|B.1.1.7|2021-05-09	Mexico	PUE	PUE-InDRE_FB16507_S2473	EPI_ISL_2455994	B.1.1.7	2021-05-09
USA|LA-CDC-ASC210061706|EPI_ISL_2180848|B.1.1.7|2021-05-10	USA	Other	LA-CDC-ASC210061706	EPI_ISL_2180848	B.1.1.7	2021-05-10
USA|TX-CDC-QDX24758446|EPI_ISL_2268580|B.1.1.7|2021-05-10	USA	Other	TX-CDC-QDX24758446	EPI_ISL_2268580	B.1.1.7	2021-05-10
Mexico|PUE_INER_IMSS_1306|EPI_ISL_2490351|B.1.1.7|2021-05-10	Mexico	PUE	PUE_INER_IMSS_1306	EPI_ISL_2490351	B.1.1.7	2021-05-10
Mexico|NLE_INER_IMSS_1091|EPI_ISL_2490341|B.1.1.7|2021-05-11	Mexico	NLE	NLE_INER_IMSS_1091	EPI_ISL_2490341	B.1.1.7	2021-05-11
USA|CO-CDC-ASC210062415|EPI_ISL_2181374|B.1.1.7|2021-05-11	USA	Other	CO-CDC-ASC210062415	EPI_ISL_2181374	B.1.1.7	2021-05-11
Mexico|MEX-INMEGEN-05-04-53|EPI_ISL_2349922|B.1.1.7|2021-05-12	Mexico	MEX	MEX-INMEGEN-05-04-53	EPI_ISL_2349922	B.1.1.7	2021-05-12
Mexico|TAM-InDRE_FB16024_S2423|EPI_ISL_2455947|B.1.1.7|2021-05-12	Mexico	TAM	TAM-InDRE_FB16024_S2423	EPI_ISL_2455947	B.1.1.7	2021-05-12
Mexico|TAM-InDRE_FB16033_S2432|EPI_ISL_2455956|B.1.1.7|2021-05-12	Mexico	TAM	TAM-InDRE_FB16033_S2432	EPI_ISL_2455956	B.1.1.7	2021-05-12
Mexico|TAM-InDRE_FB16017_S2416|EPI_ISL_2455940|B.1.1.7|2021-05-12	Mexico	TAM	TAM-InDRE_FB16017_S2416	EPI_ISL_2455940	B.1.1.7	2021-05-12
USA|MI-UM-10039745493|EPI_ISL_2400357|B.1.1.7|2021-05-13	USA	Other	MI-UM-10039745493	EPI_ISL_2400357	B.1.1.7	2021-05-13
Mexico|CMX-INMEGEN-INDRE-05-03-275|EPI_ISL_2319375|B.1.1.7|2021-05-14	Mexico	CMX	CMX-INMEGEN-INDRE-05-03-275	EPI_ISL_2319375	B.1.1.7	2021-05-14
Mexico|TAM-InDRE_FB16326_S3938|EPI_ISL_2858952|B.1.1.7|2021-05-14	Mexico	TAM	TAM-InDRE_FB16326_S3938	EPI_ISL_2858952	B.1.1.7	2021-05-14
Mexico|TAM-InDRE_FB16329_S3939|EPI_ISL_2858953|B.1.1.7|2021-05-14	Mexico	TAM	TAM-InDRE_FB16329_S3939	EPI_ISL_2858953	B.1.1.7	2021-05-14
Mexico|TAM-InDRE_FB16011_S2411|EPI_ISL_2455935|B.1.1.7|2021-05-14	Mexico	TAM	TAM-InDRE_FB16011_S2411	EPI_ISL_2455935	B.1.1.7	2021-05-14
USA|CO-CDPHE-2101112305|EPI_ISL_2311038|B.1.1.7|2021-05-15	USA	Other	CO-CDPHE-2101112305	EPI_ISL_2311038	B.1.1.7	2021-05-15
USA|CO-CDPHE-2101103937|EPI_ISL_2310985|B.1.1.7|2021-05-15	USA	Other	CO-CDPHE-2101103937	EPI_ISL_2310985	B.1.1.7	2021-05-15
USA|TN-CDC-ASC210063640|EPI_ISL_2280617|B.1.1.7|2021-05-15	USA	Other	TN-CDC-ASC210063640	EPI_ISL_2280617	B.1.1.7	2021-05-15
USA|UT-UPHL-210528169309|EPI_ISL_2458406|B.1.1.7|2021-05-15	USA	Other	UT-UPHL-210528169309	EPI_ISL_2458406	B.1.1.7	2021-05-15
Mexico|TAM-InDRE_FB16014_S2413|EPI_ISL_2455937|B.1.1.7|2021-05-15	Mexico	TAM	TAM-InDRE_FB16014_S2413	EPI_ISL_2455937	B.1.1.7	2021-05-15
Mexico|MEX-INMEGEN-05-04-337|EPI_ISL_2350115|B.1.1.7|2021-05-17	Mexico	MEX	MEX-INMEGEN-05-04-337	EPI_ISL_2350115	B.1.1.7	2021-05-17
USA|TX-CDC-QDX25062998|EPI_ISL_2397380|B.1.1.7|2021-05-17	USA	Other	TX-CDC-QDX25062998	EPI_ISL_2397380	B.1.1.7	2021-05-17
USA|WA-CDC-UW21051706083|EPI_ISL_2426316|B.1.1.7|2021-05-17	USA	Other	WA-CDC-UW21051706083	EPI_ISL_2426316	B.1.1.7	2021-05-17
Mexico|PUE-LANGEBIO_IMSS_1093|EPI_ISL_2671644|B.1.1.7|2021-05-17	Mexico	PUE	PUE-LANGEBIO_IMSS_1093	EPI_ISL_2671644	B.1.1.7	2021-05-17
Mexico|TAM-InDRE_FB16016_S2415|EPI_ISL_2455939|B.1.1.7|2021-05-17	Mexico	TAM	TAM-InDRE_FB16016_S2415	EPI_ISL_2455939	B.1.1.7	2021-05-17
Mexico|TAM-InDRE_FB16020_S2419|EPI_ISL_2455943|B.1.1.7|2021-05-17	Mexico	TAM	TAM-InDRE_FB16020_S2419	EPI_ISL_2455943	B.1.1.7	2021-05-17
Mexico|TLA-LANGEBIO_IMSS_1065|EPI_ISL_2671723|B.1.1.7|2021-05-17	Mexico	TLA	TLA-LANGEBIO_IMSS_1065	EPI_ISL_2671723	B.1.1.7	2021-05-17
Mexico|NLE-LANGEBIO_IMSS_0833|EPI_ISL_2671626|B.1.1.7|2021-05-18	Mexico	NLE	NLE-LANGEBIO_IMSS_0833	EPI_ISL_2671626	B.1.1.7	2021-05-18
USA|NM-CDC-QDX25088872|EPI_ISL_2439617|B.1.1.7|2021-05-18	USA	Other	NM-CDC-QDX25088872	EPI_ISL_2439617	B.1.1.7	2021-05-18
Mexico|TAM-LANGEBIO_IMSS_0849|EPI_ISL_2671717|B.1.1.7|2021-05-18	Mexico	TAM	TAM-LANGEBIO_IMSS_0849	EPI_ISL_2671717	B.1.1.7	2021-05-18
Mexico|NLE-InDRE_FB16191_S2464|EPI_ISL_2455985|B.1.1.7|2021-05-19	Mexico	NLE	NLE-InDRE_FB16191_S2464	EPI_ISL_2455985	B.1.1.7	2021-05-19
Mexico|NLE_LANGEBIO_IMSS_61186-NC|EPI_ISL_2970006|B.1.1.7|2021-05-19	Mexico	NLE	NLE_LANGEBIO_IMSS_61186-NC	EPI_ISL_2970006	B.1.1.7	2021-05-19
Mexico|OAX-LANGEBIO_IMSS_1126|EPI_ISL_2671639|B.1.1.7|2021-05-19	Mexico	OAX	OAX-LANGEBIO_IMSS_1126	EPI_ISL_2671639	B.1.1.7	2021-05-19
Mexico|SLP-InDRE_FB16823_S2780|EPI_ISL_2533806|B.1.1.7|2021-05-19	Mexico	SLP	SLP-InDRE_FB16823_S2780	EPI_ISL_2533806	B.1.1.7	2021-05-19
Mexico|TAB-LANGEBIO_IMSS_0911|EPI_ISL_2671705|B.1.1.7|2021-05-19	Mexico	TAB	TAB-LANGEBIO_IMSS_0911	EPI_ISL_2671705	B.1.1.7	2021-05-19
Mexico|TAM-LANGEBIO_IMSS_0854|EPI_ISL_2671718|B.1.1.7|2021-05-19	Mexico	TAM	TAM-LANGEBIO_IMSS_0854	EPI_ISL_2671718	B.1.1.7	2021-05-19
Mexico|MEX-INMEGEN-05-05-279|EPI_ISL_2444558|B.1.1.7|2021-05-20	Mexico	MEX	MEX-INMEGEN-05-05-279	EPI_ISL_2444558	B.1.1.7	2021-05-20
Mexico|NLE-LANGEBIO_IMSS_0851|EPI_ISL_2671631|B.1.1.7|2021-05-20	Mexico	NLE	NLE-LANGEBIO_IMSS_0851	EPI_ISL_2671631	B.1.1.7	2021-05-20
Mexico|TAM-InDRE_FB16727_S2772|EPI_ISL_2533798|B.1.1.7|2021-05-20	Mexico	TAM	TAM-InDRE_FB16727_S2772	EPI_ISL_2533798	B.1.1.7	2021-05-20
Mexico|TAM-InDRE_FB16733_S2774|EPI_ISL_2533800|B.1.1.7|2021-05-20	Mexico	TAM	TAM-InDRE_FB16733_S2774	EPI_ISL_2533800	B.1.1.7	2021-05-20
Mexico|TAM-InDRE_FB16726_S2771|EPI_ISL_2533797|B.1.1.7|2021-05-20	Mexico	TAM	TAM-InDRE_FB16726_S2771	EPI_ISL_2533797	B.1.1.7	2021-05-20
Mexico|DUR-LANGEBIO_IMSS_0870|EPI_ISL_2671559|B.1.1.7|2021-05-21	Mexico	DUR	DUR-LANGEBIO_IMSS_0870	EPI_ISL_2671559	B.1.1.7	2021-05-21
Mexico|MEX-INMEGEN-05-05-72|EPI_ISL_2444450|B.1.1.7|2021-05-21	Mexico	MEX	MEX-INMEGEN-05-05-72	EPI_ISL_2444450	B.1.1.7	2021-05-21
Mexico|MEX-INMEGEN-05-05-169|EPI_ISL_2444502|B.1.1.7|2021-05-21	Mexico	MEX	MEX-INMEGEN-05-05-169	EPI_ISL_2444502	B.1.1.7	2021-05-21
Mexico|MEX-INMEGEN-05-05-42|EPI_ISL_2444426|B.1.1.7|2021-05-21	Mexico	MEX	MEX-INMEGEN-05-05-42	EPI_ISL_2444426	B.1.1.7	2021-05-21
Mexico|MEX-INMEGEN-05-05-161|EPI_ISL_2444497|B.1.1.7|2021-05-21	Mexico	MEX	MEX-INMEGEN-05-05-161	EPI_ISL_2444497	B.1.1.7	2021-05-21
Mexico|TAM-InDRE_FB16728_S2773|EPI_ISL_2533799|B.1.1.7|2021-05-21	Mexico	TAM	TAM-InDRE_FB16728_S2773	EPI_ISL_2533799	B.1.1.7	2021-05-21
Mexico|PUE_IBT_IMSS_1523|EPI_ISL_2681191|B.1.1.7|2021-05-22	Mexico	PUE	PUE_IBT_IMSS_1523	EPI_ISL_2681191	B.1.1.7	2021-05-22
Mexico|TAB-InDRE_FB18331_S3971|EPI_ISL_2858985|B.1.1.7|2021-05-22	Mexico	TAB	TAB-InDRE_FB18331_S3971	EPI_ISL_2858985	B.1.1.7	2021-05-22
Mexico|TAB-InDRE_FB18330_S3970|EPI_ISL_2858984|B.1.1.7|2021-05-22	Mexico	TAB	TAB-InDRE_FB18330_S3970	EPI_ISL_2858984	B.1.1.7	2021-05-22
Mexico|TAB-InDRE_FB18332_S3972|EPI_ISL_2858986|B.1.1.7|2021-05-22	Mexico	TAB	TAB-InDRE_FB18332_S3972	EPI_ISL_2858986	B.1.1.7	2021-05-22
Mexico|COA-LANGEBIO_IMSS_0874|EPI_ISL_2671546|B.1.1.7|2021-05-23	Mexico	COA	COA-LANGEBIO_IMSS_0874	EPI_ISL_2671546	B.1.1.7	2021-05-23
USA|LA-CDC-QDX25207665|EPI_ISL_2440650|B.1.1.7|2021-05-24	USA	Other	LA-CDC-QDX25207665	EPI_ISL_2440650	B.1.1.7	2021-05-24
Mexico|CMX-InDRE_FB16521_S3061|EPI_ISL_2663328|B.1.1.7|2021-05-25	Mexico	CMX	CMX-InDRE_FB16521_S3061	EPI_ISL_2663328	B.1.1.7	2021-05-25
Mexico|TAM-LANGEBIO_IMSS_0884|EPI_ISL_2671722|B.1.1.7|2021-05-25	Mexico	TAM	TAM-LANGEBIO_IMSS_0884	EPI_ISL_2671722	B.1.1.7	2021-05-25
Mexico|YUC-LANGEBIO_IMSS_0964|EPI_ISL_2671754|B.1.1.7|2021-05-26	Mexico	YUC	YUC-LANGEBIO_IMSS_0964	EPI_ISL_2671754	B.1.1.7	2021-05-26
Mexico|PUE-IBT_IMSS_1889|EPI_ISL_2801758|B.1.1.7|2021-05-27	Mexico	PUE	PUE-IBT_IMSS_1889	EPI_ISL_2801758	B.1.1.7	2021-05-27
Mexico|GUA-InDRE_FB16894_S3117|EPI_ISL_2663384|B.1.1.7|2021-05-28	Mexico	GUA	GUA-InDRE_FB16894_S3117	EPI_ISL_2663384	B.1.1.7	2021-05-28
Mexico|ROO_IBT_IMSS_1729|EPI_ISL_2681233|B.1.1.7|2021-05-28	Mexico	ROO	ROO_IBT_IMSS_1729	EPI_ISL_2681233	B.1.1.7	2021-05-28
Mexico|TAM-InDRE_FB17060_S3083|EPI_ISL_2663350|B.1.1.7|2021-05-28	Mexico	TAM	TAM-InDRE_FB17060_S3083	EPI_ISL_2663350	B.1.1.7	2021-05-28
Mexico|CMX-INMEGEN-05-06-369|EPI_ISL_2603813|B.1.1.7|2021-05-29	Mexico	CMX	CMX-INMEGEN-05-06-369	EPI_ISL_2603813	B.1.1.7	2021-05-29
Mexico|PUE-IBT_IMSS_1913|EPI_ISL_2801778|B.1.1.7|2021-05-29	Mexico	PUE	PUE-IBT_IMSS_1913	EPI_ISL_2801778	B.1.1.7	2021-05-29
Mexico|TAB-InDRE_FB16514_S2743|EPI_ISL_2533769|B.1.1.7|2021-05-29	Mexico	TAB	TAB-InDRE_FB16514_S2743	EPI_ISL_2533769	B.1.1.7	2021-05-29
Mexico|TAB-InDRE_FB16513_S2742|EPI_ISL_2533768|B.1.1.7|2021-05-29	Mexico	TAB	TAB-InDRE_FB16513_S2742	EPI_ISL_2533768	B.1.1.7	2021-05-29
Mexico|VER-IBT_IMSS_1892|EPI_ISL_2801760|B.1.1.7|2021-05-30	Mexico	VER	VER-IBT_IMSS_1892	EPI_ISL_2801760	B.1.1.7	2021-05-30
Mexico|TAB_IBT_IMSS_10132-NC|EPI_ISL_2681374|B.1.1.7|2021-05-31	Mexico	TAB	TAB_IBT_IMSS_10132-NC	EPI_ISL_2681374	B.1.1.7	2021-05-31
Mexico|TAM-InDRE_FB17077_S3134|EPI_ISL_2663401|B.1.1.7|2021-05-31	Mexico	TAM	TAM-InDRE_FB17077_S3134	EPI_ISL_2663401	B.1.1.7	2021-05-31
Mexico|TAM-InDRE_FB17076_S3133|EPI_ISL_2663400|B.1.1.7|2021-05-31	Mexico	TAM	TAM-InDRE_FB17076_S3133	EPI_ISL_2663400	B.1.1.7	2021-05-31
Mexico|CHH_IBT_IMSS_1444|EPI_ISL_2681104|B.1.1.7|2021-06-01	Mexico	CHH	CHH_IBT_IMSS_1444	EPI_ISL_2681104	B.1.1.7	2021-06-01
Mexico|NLE_IBT_IMSS_1415|EPI_ISL_2681197|B.1.1.7|2021-06-01	Mexico	NLE	NLE_IBT_IMSS_1415	EPI_ISL_2681197	B.1.1.7	2021-06-01
Mexico|NLE_IBT_IMSS_1404|EPI_ISL_2681127|B.1.1.7|2021-06-01	Mexico	NLE	NLE_IBT_IMSS_1404	EPI_ISL_2681127	B.1.1.7	2021-06-01
Mexico|NLE-InDRE_FB16953_S3123|EPI_ISL_2663390|B.1.1.7|2021-06-01	Mexico	NLE	NLE-InDRE_FB16953_S3123	EPI_ISL_2663390	B.1.1.7	2021-06-01
Mexico|TAB-INMEGEN-05-06-253|EPI_ISL_2603724|B.1.1.7|2021-06-01	Mexico	TAB	TAB-INMEGEN-05-06-253	EPI_ISL_2603724	B.1.1.7	2021-06-01
Mexico|TAB-InDRE_FB16926_S3069|EPI_ISL_2663336|B.1.1.7|2021-06-01	Mexico	TAB	TAB-InDRE_FB16926_S3069	EPI_ISL_2663336	B.1.1.7	2021-06-01
Mexico|TAB-InDRE_FB16929_S3070|EPI_ISL_2663337|B.1.1.7|2021-06-01	Mexico	TAB	TAB-InDRE_FB16929_S3070	EPI_ISL_2663337	B.1.1.7	2021-06-01
Mexico|TAB-INMEGEN-05-06-261|EPI_ISL_2603732|B.1.1.7|2021-06-01	Mexico	TAB	TAB-INMEGEN-05-06-261	EPI_ISL_2603732	B.1.1.7	2021-06-01
Mexico|TAB-INMEGEN-05-06-245|EPI_ISL_2603720|B.1.1.7|2021-06-01	Mexico	TAB	TAB-INMEGEN-05-06-245	EPI_ISL_2603720	B.1.1.7	2021-06-01
Mexico|YUC-INMEGEN-05-06-269|EPI_ISL_2603739|B.1.1.7|2021-06-01	Mexico	YUC	YUC-INMEGEN-05-06-269	EPI_ISL_2603739	B.1.1.7	2021-06-01
Mexico|YUC-InDRE_FB17499_S3498|EPI_ISL_2779013|B.1.1.7|2021-06-01	Mexico	YUC	YUC-InDRE_FB17499_S3498	EPI_ISL_2779013	B.1.1.7	2021-06-01
Mexico|CHH_IBT_IMSS_1443|EPI_ISL_2681219|B.1.1.7|2021-06-02	Mexico	CHH	CHH_IBT_IMSS_1443	EPI_ISL_2681219	B.1.1.7	2021-06-02
Mexico|NLE_IBT_IMSS_1426|EPI_ISL_2681102|B.1.1.7|2021-06-02	Mexico	NLE	NLE_IBT_IMSS_1426	EPI_ISL_2681102	B.1.1.7	2021-06-02
Mexico|NLE-InDRE_FB16961_S3124|EPI_ISL_2663391|B.1.1.7|2021-06-02	Mexico	NLE	NLE-InDRE_FB16961_S3124	EPI_ISL_2663391	B.1.1.7	2021-06-02
Mexico|NLE-InDRE_FB18317_S3969|EPI_ISL_2858983|B.1.1.7|2021-06-02	Mexico	NLE	NLE-InDRE_FB18317_S3969	EPI_ISL_2858983	B.1.1.7	2021-06-02
Mexico|NLE_IBT_IMSS_1411|EPI_ISL_2681303|B.1.1.7|2021-06-02	Mexico	NLE	NLE_IBT_IMSS_1411	EPI_ISL_2681303	B.1.1.7	2021-06-02
Mexico|NLE_IBT_IMSS_1418|EPI_ISL_2681096|B.1.1.7|2021-06-02	Mexico	NLE	NLE_IBT_IMSS_1418	EPI_ISL_2681096	B.1.1.7	2021-06-02
Mexico|TAM-InDRE_FB17466_S3488|EPI_ISL_2779003|B.1.1.7|2021-06-02	Mexico	TAM	TAM-InDRE_FB17466_S3488	EPI_ISL_2779003	B.1.1.7	2021-06-02
Mexico|MEX-INMEGEN-06-03-160|EPI_ISL_2810147|B.1.1.7|2021-06-03	Mexico	MEX	MEX-INMEGEN-06-03-160	EPI_ISL_2810147	B.1.1.7	2021-06-03
Mexico|NLE-IBT_IMSS_1768|EPI_ISL_2801663|B.1.1.7|2021-06-03	Mexico	NLE	NLE-IBT_IMSS_1768	EPI_ISL_2801663	B.1.1.7	2021-06-03
Mexico|NLE-IBT_IMSS_1764|EPI_ISL_2801661|B.1.1.7|2021-06-03	Mexico	NLE	NLE-IBT_IMSS_1764	EPI_ISL_2801661	B.1.1.7	2021-06-03
Mexico|PUE-IBT_IMSS_1944|EPI_ISL_2801806|B.1.1.7|2021-06-03	Mexico	PUE	PUE-IBT_IMSS_1944	EPI_ISL_2801806	B.1.1.7	2021-06-03
Mexico|ROO-INMEGEN-06-01-241|EPI_ISL_2616867|B.1.1.7|2021-06-03	Mexico	ROO	ROO-INMEGEN-06-01-241	EPI_ISL_2616867	B.1.1.7	2021-06-03
Mexico|TAB-INMEGEN-06-01-219|EPI_ISL_2616902|B.1.1.7|2021-06-03	Mexico	TAB	TAB-INMEGEN-06-01-219	EPI_ISL_2616902	B.1.1.7	2021-06-03
Mexico|TAB-InDRE_FB16944_S3072|EPI_ISL_2663339|B.1.1.7|2021-06-03	Mexico	TAB	TAB-InDRE_FB16944_S3072	EPI_ISL_2663339	B.1.1.7	2021-06-03
Mexico|TAB-INMEGEN-06-01-243|EPI_ISL_2616917|B.1.1.7|2021-06-03	Mexico	TAB	TAB-INMEGEN-06-01-243	EPI_ISL_2616917	B.1.1.7	2021-06-03
Mexico|TAB-INMEGEN-06-01-211|EPI_ISL_2616918|B.1.1.7|2021-06-03	Mexico	TAB	TAB-INMEGEN-06-01-211	EPI_ISL_2616918	B.1.1.7	2021-06-03
Mexico|NLE-IBT_IMSS_1774|EPI_ISL_2801667|B.1.1.7|2021-06-04	Mexico	NLE	NLE-IBT_IMSS_1774	EPI_ISL_2801667	B.1.1.7	2021-06-04
Mexico|ROO-IBT_IMSS_2068|EPI_ISL_2801619|B.1.1.7|2021-06-04	Mexico	ROO	ROO-IBT_IMSS_2068	EPI_ISL_2801619	B.1.1.7	2021-06-04
Mexico|TAB-INMEGEN-06-01-348|EPI_ISL_2616988|B.1.1.7|2021-06-04	Mexico	TAB	TAB-INMEGEN-06-01-348	EPI_ISL_2616988	B.1.1.7	2021-06-04
Mexico|TAB-InDRE_FB17014_S3080|EPI_ISL_2663347|B.1.1.7|2021-06-04	Mexico	TAB	TAB-InDRE_FB17014_S3080	EPI_ISL_2663347	B.1.1.7	2021-06-04
Mexico|TAB-InDRE_FB17013_S3079|EPI_ISL_2663346|B.1.1.7|2021-06-04	Mexico	TAB	TAB-InDRE_FB17013_S3079	EPI_ISL_2663346	B.1.1.7	2021-06-04
Mexico|TAB-INMEGEN-06-01-364|EPI_ISL_2616972|B.1.1.7|2021-06-04	Mexico	TAB	TAB-INMEGEN-06-01-364	EPI_ISL_2616972	B.1.1.7	2021-06-04
Mexico|TAM-INMEGEN-06-01-347|EPI_ISL_2616961|B.1.1.7|2021-06-04	Mexico	TAM	TAM-INMEGEN-06-01-347	EPI_ISL_2616961	B.1.1.7	2021-06-04
Mexico|YUC-InDRE_FB17531_S3503|EPI_ISL_2779018|B.1.1.7|2021-06-04	Mexico	YUC	YUC-InDRE_FB17531_S3503	EPI_ISL_2779018	B.1.1.7	2021-06-04
Mexico|ROO-INMEGEN-06-01-353|EPI_ISL_2616971|B.1.1.7|2021-06-05	Mexico	ROO	ROO-INMEGEN-06-01-353	EPI_ISL_2616971	B.1.1.7	2021-06-05
Mexico|TAB-InDRE_FB17020_S3081|EPI_ISL_2663348|B.1.1.7|2021-06-05	Mexico	TAB	TAB-InDRE_FB17020_S3081	EPI_ISL_2663348	B.1.1.7	2021-06-05
Mexico|TAM-InDRE_FB17423_S3928|EPI_ISL_2858942|B.1.1.7|2021-06-05	Mexico	TAM	TAM-InDRE_FB17423_S3928	EPI_ISL_2858942	B.1.1.7	2021-06-05
Mexico|PUE-IBT_IMSS_2022|EPI_ISL_2801869|B.1.1.7|2021-06-06	Mexico	PUE	PUE-IBT_IMSS_2022	EPI_ISL_2801869	B.1.1.7	2021-06-06
Mexico|SLP-IBT_IMSS_1823|EPI_ISL_2801699|B.1.1.7|2021-06-06	Mexico	SLP	SLP-IBT_IMSS_1823	EPI_ISL_2801699	B.1.1.7	2021-06-06
Mexico|YUC-IBT_IMSS_2049|EPI_ISL_2801602|B.1.1.7|2021-06-06	Mexico	YUC	YUC-IBT_IMSS_2049	EPI_ISL_2801602	B.1.1.7	2021-06-06
Mexico|CHH-IBT_IMSS_1799|EPI_ISL_2801678|B.1.1.7|2021-06-07	Mexico	CHH	CHH-IBT_IMSS_1799	EPI_ISL_2801678	B.1.1.7	2021-06-07
Mexico|NLE-IBT_IMSS_1796|EPI_ISL_2801675|B.1.1.7|2021-06-07	Mexico	NLE	NLE-IBT_IMSS_1796	EPI_ISL_2801675	B.1.1.7	2021-06-07
Mexico|ROO-INMEGEN-06-02-77|EPI_ISL_2692607|B.1.1.7|2021-06-07	Mexico	ROO	ROO-INMEGEN-06-02-77	EPI_ISL_2692607	B.1.1.7	2021-06-07
Mexico|SLP-IBT_IMSS_1824|EPI_ISL_2801700|B.1.1.7|2021-06-07	Mexico	SLP	SLP-IBT_IMSS_1824	EPI_ISL_2801700	B.1.1.7	2021-06-07
Mexico|TAB-InDRE_FB17030_S3084|EPI_ISL_2663351|B.1.1.7|2021-06-07	Mexico	TAB	TAB-InDRE_FB17030_S3084	EPI_ISL_2663351	B.1.1.7	2021-06-07
Mexico|TAB-INMEGEN-06-02-158|EPI_ISL_2692674|B.1.1.7|2021-06-07	Mexico	TAB	TAB-INMEGEN-06-02-158	EPI_ISL_2692674	B.1.1.7	2021-06-07
Mexico|TAB-INMEGEN-06-02-102|EPI_ISL_2692630|B.1.1.7|2021-06-07	Mexico	TAB	TAB-INMEGEN-06-02-102	EPI_ISL_2692630	B.1.1.7	2021-06-07
Mexico|TAB-InDRE_FB17043_S3082|EPI_ISL_2663349|B.1.1.7|2021-06-07	Mexico	TAB	TAB-InDRE_FB17043_S3082	EPI_ISL_2663349	B.1.1.7	2021-06-07
Mexico|TAM-InDRE_FB17425_S3929|EPI_ISL_2858943|B.1.1.7|2021-06-07	Mexico	TAM	TAM-InDRE_FB17425_S3929	EPI_ISL_2858943	B.1.1.7	2021-06-07
Mexico|BCN-IBT_IMSS_2033|EPI_ISL_2801878|B.1.1.7|2021-06-08	Mexico	BCN	BCN-IBT_IMSS_2033	EPI_ISL_2801878	B.1.1.7	2021-06-08
Mexico|NLE-IBT_IMSS_1786|EPI_ISL_2801670|B.1.1.7|2021-06-08	Mexico	NLE	NLE-IBT_IMSS_1786	EPI_ISL_2801670	B.1.1.7	2021-06-08
Mexico|NLE-InDRE_FB17366_S3922|EPI_ISL_2858936|B.1.1.7|2021-06-08	Mexico	NLE	NLE-InDRE_FB17366_S3922	EPI_ISL_2858936	B.1.1.7	2021-06-08
Mexico|NLE-IBT_IMSS_1779|EPI_ISL_2801668|B.1.1.7|2021-06-08	Mexico	NLE	NLE-IBT_IMSS_1779	EPI_ISL_2801668	B.1.1.7	2021-06-08
Mexico|ROO-INMEGEN-06-02-99|EPI_ISL_2692627|B.1.1.7|2021-06-08	Mexico	ROO	ROO-INMEGEN-06-02-99	EPI_ISL_2692627	B.1.1.7	2021-06-08
Mexico|TAM-InDRE_FB17463_S3487|EPI_ISL_2779002|B.1.1.7|2021-06-08	Mexico	TAM	TAM-InDRE_FB17463_S3487	EPI_ISL_2779002	B.1.1.7	2021-06-08
Mexico|TAM-InDRE_FB17471_S3489|EPI_ISL_2779004|B.1.1.7|2021-06-08	Mexico	TAM	TAM-InDRE_FB17471_S3489	EPI_ISL_2779004	B.1.1.7	2021-06-08
Mexico|TAB-INMEGEN-06-03-352|EPI_ISL_2810305|B.1.1.7|2021-06-09	Mexico	TAB	TAB-INMEGEN-06-03-352	EPI_ISL_2810305	B.1.1.7	2021-06-09
Mexico|TAB-InDRE_FB17301_S3472|EPI_ISL_2778987|B.1.1.7|2021-06-09	Mexico	TAB	TAB-InDRE_FB17301_S3472	EPI_ISL_2778987	B.1.1.7	2021-06-09
Mexico|TAB-InDRE_FB17298_S3469|EPI_ISL_2778984|B.1.1.7|2021-06-09	Mexico	TAB	TAB-InDRE_FB17298_S3469	EPI_ISL_2778984	B.1.1.7	2021-06-09
Mexico|TAM-InDRE_FB18105_S3954|EPI_ISL_2858968|B.1.1.7|2021-06-09	Mexico	TAM	TAM-InDRE_FB18105_S3954	EPI_ISL_2858968	B.1.1.7	2021-06-09
Mexico|TAM-InDRE_FB18138_S4125|EPI_ISL_2920696|B.1.1.7|2021-06-09	Mexico	TAM	TAM-InDRE_FB18138_S4125	EPI_ISL_2920696	B.1.1.7	2021-06-09
Mexico|YUC-INMEGEN-06-04-75|EPI_ISL_2894219|B.1.1.7|2021-06-09	Mexico	YUC	YUC-INMEGEN-06-04-75	EPI_ISL_2894219	B.1.1.7	2021-06-09
Mexico|NLE-IBT_IMSS_1810|EPI_ISL_2801686|B.1.1.7|2021-06-10	Mexico	NLE	NLE-IBT_IMSS_1810	EPI_ISL_2801686	B.1.1.7	2021-06-10
Mexico|NLE-InDRE_FB17368_S3923|EPI_ISL_2858937|B.1.1.7|2021-06-10	Mexico	NLE	NLE-InDRE_FB17368_S3923	EPI_ISL_2858937	B.1.1.7	2021-06-10
Mexico|NLE-IBT_IMSS_1800|EPI_ISL_2801679|B.1.1.7|2021-06-10	Mexico	NLE	NLE-IBT_IMSS_1800	EPI_ISL_2801679	B.1.1.7	2021-06-10
Mexico|NLE-IBT_IMSS_1797|EPI_ISL_2801676|B.1.1.7|2021-06-10	Mexico	NLE	NLE-IBT_IMSS_1797	EPI_ISL_2801676	B.1.1.7	2021-06-10
Mexico|NLE-IBT_IMSS_1809|EPI_ISL_2801685|B.1.1.7|2021-06-10	Mexico	NLE	NLE-IBT_IMSS_1809	EPI_ISL_2801685	B.1.1.7	2021-06-10
Mexico|ROO-INMEGEN-06-04-54|EPI_ISL_2894198|B.1.1.7|2021-06-10	Mexico	ROO	ROO-INMEGEN-06-04-54	EPI_ISL_2894198	B.1.1.7	2021-06-10
Mexico|TAB-InDRE_FB17315_S3473|EPI_ISL_2778988|B.1.1.7|2021-06-10	Mexico	TAB	TAB-InDRE_FB17315_S3473	EPI_ISL_2778988	B.1.1.7	2021-06-10
Mexico|PUE-InDRE_FB17766_S3526|EPI_ISL_2779041|B.1.1.7|2021-06-11	Mexico	PUE	PUE-InDRE_FB17766_S3526	EPI_ISL_2779041	B.1.1.7	2021-06-11
Mexico|PUE-InDRE_FB17767_S3527|EPI_ISL_2779042|B.1.1.7|2021-06-11	Mexico	PUE	PUE-InDRE_FB17767_S3527	EPI_ISL_2779042	B.1.1.7	2021-06-11
Mexico|ROO-INMEGEN-06-04-316|EPI_ISL_2894363|B.1.1.7|2021-06-11	Mexico	ROO	ROO-INMEGEN-06-04-316	EPI_ISL_2894363	B.1.1.7	2021-06-11
Mexico|ROO-INMEGEN-06-04-320|EPI_ISL_2894366|B.1.1.7|2021-06-11	Mexico	ROO	ROO-INMEGEN-06-04-320	EPI_ISL_2894366	B.1.1.7	2021-06-11
Mexico|TAB-InDRE_FB17680_S3513|EPI_ISL_2779028|B.1.1.7|2021-06-11	Mexico	TAB	TAB-InDRE_FB17680_S3513	EPI_ISL_2779028	B.1.1.7	2021-06-11
Mexico|TAB-InDRE_FB17801_S3530|EPI_ISL_2779045|B.1.1.7|2021-06-11	Mexico	TAB	TAB-InDRE_FB17801_S3530	EPI_ISL_2779045	B.1.1.7	2021-06-11
Mexico|ROO-INMEGEN-06-04-323|EPI_ISL_2894369|B.1.1.7|2021-06-12	Mexico	ROO	ROO-INMEGEN-06-04-323	EPI_ISL_2894369	B.1.1.7	2021-06-12
Mexico|TAB-InDRE_FB17674_S3510|EPI_ISL_2779025|B.1.1.7|2021-06-12	Mexico	TAB	TAB-InDRE_FB17674_S3510	EPI_ISL_2779025	B.1.1.7	2021-06-12
Mexico|TAB-InDRE_FB17675_S3511|EPI_ISL_2779026|B.1.1.7|2021-06-12	Mexico	TAB	TAB-InDRE_FB17675_S3511	EPI_ISL_2779026	B.1.1.7	2021-06-12
Mexico|TAB-InDRE_FB17673_S3509|EPI_ISL_2779024|B.1.1.7|2021-06-12	Mexico	TAB	TAB-InDRE_FB17673_S3509	EPI_ISL_2779024	B.1.1.7	2021-06-12
Mexico|TAM-InDRE_FB18134_S4123|EPI_ISL_2920694|B.1.1.7|2021-06-12	Mexico	TAM	TAM-InDRE_FB18134_S4123	EPI_ISL_2920694	B.1.1.7	2021-06-12
Mexico|YUC-INMEGEN-06-04-293|EPI_ISL_2894340|B.1.1.7|2021-06-12	Mexico	YUC	YUC-INMEGEN-06-04-293	EPI_ISL_2894340	B.1.1.7	2021-06-12
Mexico|NLE-InDRE_FB18090_S4118|EPI_ISL_2920689|B.1.1.7|2021-06-14	Mexico	NLE	NLE-InDRE_FB18090_S4118	EPI_ISL_2920689	B.1.1.7	2021-06-14
Mexico|TAB-InDRE_FB17694_S3518|EPI_ISL_2779033|B.1.1.7|2021-06-14	Mexico	TAB	TAB-InDRE_FB17694_S3518	EPI_ISL_2779033	B.1.1.7	2021-06-14
Mexico|TAB-InDRE_FB17689_S3516|EPI_ISL_2779031|B.1.1.7|2021-06-14	Mexico	TAB	TAB-InDRE_FB17689_S3516	EPI_ISL_2779031	B.1.1.7	2021-06-14
Mexico|TAB-InDRE_FB17687_S3514|EPI_ISL_2779029|B.1.1.7|2021-06-14	Mexico	TAB	TAB-InDRE_FB17687_S3514	EPI_ISL_2779029	B.1.1.7	2021-06-14
Mexico|TAM-InDRE_FB18106_S3955|EPI_ISL_2858969|B.1.1.7|2021-06-14	Mexico	TAM	TAM-InDRE_FB18106_S3955	EPI_ISL_2858969	B.1.1.7	2021-06-14
Mexico|TAM-InDRE_FB18137_S4124|EPI_ISL_2920695|B.1.1.7|2021-06-14	Mexico	TAM	TAM-InDRE_FB18137_S4124	EPI_ISL_2920695	B.1.1.7	2021-06-14
Mexico|TAM-InDRE_FB18098_S3951|EPI_ISL_2858965|B.1.1.7|2021-06-14	Mexico	TAM	TAM-InDRE_FB18098_S3951	EPI_ISL_2858965	B.1.1.7	2021-06-14
Mexico|NLE-InDRE_FB18085_S4117|EPI_ISL_2920688|B.1.1.7|2021-06-15	Mexico	NLE	NLE-InDRE_FB18085_S4117	EPI_ISL_2920688	B.1.1.7	2021-06-15
Mexico|NLE-InDRE_FB18082_S4116|EPI_ISL_2920687|B.1.1.7|2021-06-15	Mexico	NLE	NLE-InDRE_FB18082_S4116	EPI_ISL_2920687	B.1.1.7	2021-06-15
Mexico|NLE-InDRE_FB18093_S4119|EPI_ISL_2920690|B.1.1.7|2021-06-15	Mexico	NLE	NLE-InDRE_FB18093_S4119	EPI_ISL_2920690	B.1.1.7	2021-06-15
Mexico|TAM-InDRE_FB18103_S3952|EPI_ISL_2858966|B.1.1.7|2021-06-15	Mexico	TAM	TAM-InDRE_FB18103_S3952	EPI_ISL_2858966	B.1.1.7	2021-06-15
Mexico|TAM-InDRE_FB18115_S3956|EPI_ISL_2858970|B.1.1.7|2021-06-15	Mexico	TAM	TAM-InDRE_FB18115_S3956	EPI_ISL_2858970	B.1.1.7	2021-06-15
Mexico|TAM-InDRE_FB18104_S3953|EPI_ISL_2858967|B.1.1.7|2021-06-15	Mexico	TAM	TAM-InDRE_FB18104_S3953	EPI_ISL_2858967	B.1.1.7	2021-06-15
Mexico|TAM-InDRE_FB18145_S4129|EPI_ISL_2920700|B.1.1.7|2021-06-15	Mexico	TAM	TAM-InDRE_FB18145_S4129	EPI_ISL_2920700	B.1.1.7	2021-06-15
Mexico|TAM-InDRE_FB18142_S4126|EPI_ISL_2920697|B.1.1.7|2021-06-15	Mexico	TAM	TAM-InDRE_FB18142_S4126	EPI_ISL_2920697	B.1.1.7	2021-06-15
Mexico|TAM-InDRE_FB18143_S4127|EPI_ISL_2920698|B.1.1.7|2021-06-15	Mexico	TAM	TAM-InDRE_FB18143_S4127	EPI_ISL_2920698	B.1.1.7	2021-06-15
Mexico|CAM-InDRE_FB18927_S4478|EPI_ISL_3033332|B.1.1.7|2021-06-16	Mexico	CAM	CAM-InDRE_FB18927_S4478	EPI_ISL_3033332	B.1.1.7	2021-06-16
Mexico|CHH-LANGEBIO_IMSS_1366|EPI_ISL_2942497|B.1.1.7|2021-06-16	Mexico	CHH	CHH-LANGEBIO_IMSS_1366	EPI_ISL_2942497	B.1.1.7	2021-06-16
Mexico|NLE-InDRE_FB18095_S4121|EPI_ISL_2920692|B.1.1.7|2021-06-16	Mexico	NLE	NLE-InDRE_FB18095_S4121	EPI_ISL_2920692	B.1.1.7	2021-06-16
Mexico|NLE-InDRE_FB18094_S4120|EPI_ISL_2920691|B.1.1.7|2021-06-16	Mexico	NLE	NLE-InDRE_FB18094_S4120	EPI_ISL_2920691	B.1.1.7	2021-06-16
Mexico|SLP-InDRE_FB18343_S3975|EPI_ISL_2858989|B.1.1.7|2021-06-16	Mexico	SLP	SLP-InDRE_FB18343_S3975	EPI_ISL_2858989	B.1.1.7	2021-06-16
Mexico|TAB-InDRE_FB17995_S3943|EPI_ISL_2858957|B.1.1.7|2021-06-16	Mexico	TAB	TAB-InDRE_FB17995_S3943	EPI_ISL_2858957	B.1.1.7	2021-06-16
Mexico|TAM-InDRE_FB18116_S3957|EPI_ISL_2858971|B.1.1.7|2021-06-16	Mexico	TAM	TAM-InDRE_FB18116_S3957	EPI_ISL_2858971	B.1.1.7	2021-06-16
Mexico|TAM-InDRE_FB18146_S4130|EPI_ISL_2920701|B.1.1.7|2021-06-16	Mexico	TAM	TAM-InDRE_FB18146_S4130	EPI_ISL_2920701	B.1.1.7	2021-06-16
Mexico|TAM-LANGEBIO_IMSS_1368|EPI_ISL_2942498|B.1.1.7|2021-06-16	Mexico	TAM	TAM-LANGEBIO_IMSS_1368	EPI_ISL_2942498	B.1.1.7	2021-06-16
Mexico|YUC-INMEGEN-16-301|EPI_ISL_2978611|B.1.1.7|2021-06-16	Mexico	YUC	YUC-INMEGEN-16-301	EPI_ISL_2978611	B.1.1.7	2021-06-16
Mexico|YUC-INMEGEN-16-333|EPI_ISL_2978638|B.1.1.7|2021-06-16	Mexico	YUC	YUC-INMEGEN-16-333	EPI_ISL_2978638	B.1.1.7	2021-06-16
Mexico|NLE-LANGEBIO_IMSS_1355|EPI_ISL_2942486|B.1.1.7|2021-06-17	Mexico	NLE	NLE-LANGEBIO_IMSS_1355	EPI_ISL_2942486	B.1.1.7	2021-06-17
Mexico|NLE-LANGEBIO_IMSS_1357|EPI_ISL_2942488|B.1.1.7|2021-06-17	Mexico	NLE	NLE-LANGEBIO_IMSS_1357	EPI_ISL_2942488	B.1.1.7	2021-06-17
Mexico|SON-InDRE_FB18274_S4135|EPI_ISL_2920706|B.1.1.7|2021-06-17	Mexico	SON	SON-InDRE_FB18274_S4135	EPI_ISL_2920706	B.1.1.7	2021-06-17
Mexico|TAB-InDRE_FB18030_S3948|EPI_ISL_2858962|B.1.1.7|2021-06-17	Mexico	TAB	TAB-InDRE_FB18030_S3948	EPI_ISL_2858962	B.1.1.7	2021-06-17
Mexico|TAB-InDRE_FB18008_S3945|EPI_ISL_2858959|B.1.1.7|2021-06-17	Mexico	TAB	TAB-InDRE_FB18008_S3945	EPI_ISL_2858959	B.1.1.7	2021-06-17
Mexico|TAM-InDRE_FB18896_S4159|EPI_ISL_2920730|B.1.1.7|2021-06-17	Mexico	TAM	TAM-InDRE_FB18896_S4159	EPI_ISL_2920730	B.1.1.7	2021-06-17
Mexico|CAM-InDRE_FB18929_S4479|EPI_ISL_3033333|B.1.1.7|2021-06-18	Mexico	CAM	CAM-InDRE_FB18929_S4479	EPI_ISL_3033333	B.1.1.7	2021-06-18
Mexico|CAM-LANGEBIO_IMSS_1190|EPI_ISL_2942351|B.1.1.7|2021-06-18	Mexico	CAM	CAM-LANGEBIO_IMSS_1190	EPI_ISL_2942351	B.1.1.7	2021-06-18
Mexico|SIN-CIAD-MZT_S7130|EPI_ISL_2987721|B.1.1.7|2021-06-18	Mexico	SIN	SIN-CIAD-MZT_S7130	EPI_ISL_2987721	B.1.1.7	2021-06-18
Mexico|TAB-InDRE_FB18032_S3949|EPI_ISL_2858963|B.1.1.7|2021-06-18	Mexico	TAB	TAB-InDRE_FB18032_S3949	EPI_ISL_2858963	B.1.1.7	2021-06-18
Mexico|TAM-InDRE_FB18898_S4469|EPI_ISL_3033323|B.1.1.7|2021-06-18	Mexico	TAM	TAM-InDRE_FB18898_S4469	EPI_ISL_3033323	B.1.1.7	2021-06-18
Mexico|TAM-InDRE_FB18879_S4156|EPI_ISL_2920727|B.1.1.7|2021-06-18	Mexico	TAM	TAM-InDRE_FB18879_S4156	EPI_ISL_2920727	B.1.1.7	2021-06-18
Mexico|TAM-InDRE_FB18905_S4471|EPI_ISL_3033325|B.1.1.7|2021-06-18	Mexico	TAM	TAM-InDRE_FB18905_S4471	EPI_ISL_3033325	B.1.1.7	2021-06-18
Mexico|TAM_LANGEBIO_IMSS_67638-NC|EPI_ISL_2970051|B.1.1.7|2021-06-20	Mexico	TAM	TAM_LANGEBIO_IMSS_67638-NC	EPI_ISL_2970051	B.1.1.7	2021-06-20
Mexico|NLE-LANGEBIO_IMSS_1660|EPI_ISL_2942757|B.1.1.7|2021-06-21	Mexico	NLE	NLE-LANGEBIO_IMSS_1660	EPI_ISL_2942757	B.1.1.7	2021-06-21
Mexico|TAB-InDRE_FB18197_S3962|EPI_ISL_2858976|B.1.1.7|2021-06-21	Mexico	TAB	TAB-InDRE_FB18197_S3962	EPI_ISL_2858976	B.1.1.7	2021-06-21
Mexico|TAB-InDRE_FB18207_S3963|EPI_ISL_2858977|B.1.1.7|2021-06-21	Mexico	TAB	TAB-InDRE_FB18207_S3963	EPI_ISL_2858977	B.1.1.7	2021-06-21
Mexico|TAM-InDRE_FB18909_S4472|EPI_ISL_3033326|B.1.1.7|2021-06-21	Mexico	TAM	TAM-InDRE_FB18909_S4472	EPI_ISL_3033326	B.1.1.7	2021-06-21
Mexico|TAM-InDRE_FB18922_S4476|EPI_ISL_3033330|B.1.1.7|2021-06-22	Mexico	TAM	TAM-InDRE_FB18922_S4476	EPI_ISL_3033330	B.1.1.7	2021-06-22
Mexico|TAM-InDRE_FB18891_S4158|EPI_ISL_2920729|B.1.1.7|2021-06-22	Mexico	TAM	TAM-InDRE_FB18891_S4158	EPI_ISL_2920729	B.1.1.7	2021-06-22
Mexico|YUC-Biomedicos-6220333|EPI_ISL_2928304|B.1.1.7|2021-06-22	Mexico	YUC	YUC-Biomedicos-6220333	EPI_ISL_2928304	B.1.1.7	2021-06-22
Mexico|TAB-LANGEBIO_IMSS_1519|EPI_ISL_2942632|B.1.1.7|2021-06-23	Mexico	TAB	TAB-LANGEBIO_IMSS_1519	EPI_ISL_2942632	B.1.1.7	2021-06-23
Mexico|TAB-InDRE_FB18381_S4143|EPI_ISL_2920714|B.1.1.7|2021-06-23	Mexico	TAB	TAB-InDRE_FB18381_S4143	EPI_ISL_2920714	B.1.1.7	2021-06-23
Mexico|TAB-InDRE_FB18389_S4145|EPI_ISL_2920716|B.1.1.7|2021-06-23	Mexico	TAB	TAB-InDRE_FB18389_S4145	EPI_ISL_2920716	B.1.1.7	2021-06-23
Mexico|TAB-INMEGEN-17-128|EPI_ISL_3067913|B.1.1.7|2021-06-23	Mexico	TAB	TAB-INMEGEN-17-128	EPI_ISL_3067913	B.1.1.7	2021-06-23
Mexico|TAM-InDRE_FB18925_S4477|EPI_ISL_3033331|B.1.1.7|2021-06-23	Mexico	TAM	TAM-InDRE_FB18925_S4477	EPI_ISL_3033331	B.1.1.7	2021-06-23
Mexico|YUC-LANGEBIO_IMSS_1240|EPI_ISL_2942401|B.1.1.7|2021-06-23	Mexico	YUC	YUC-LANGEBIO_IMSS_1240	EPI_ISL_2942401	B.1.1.7	2021-06-23
Mexico|YUC-InDRE_FB19014_S4486|EPI_ISL_3033340|B.1.1.7|2021-06-23	Mexico	YUC	YUC-InDRE_FB19014_S4486	EPI_ISL_3033340	B.1.1.7	2021-06-23
Mexico|COA-LANGEBIO_IMSS_1377|EPI_ISL_2942505|B.1.1.7|2021-06-24	Mexico	COA	COA-LANGEBIO_IMSS_1377	EPI_ISL_2942505	B.1.1.7	2021-06-24
Mexico|MEX-INMEGEN-06-03-62|EPI_ISL_2810072|B.1.1.7|2021-06-24	Mexico	MEX	MEX-INMEGEN-06-03-62	EPI_ISL_2810072	B.1.1.7	2021-06-24
Mexico|SLP-LANGEBIO_IMSS_1333|EPI_ISL_2942476|B.1.1.7|2021-06-24	Mexico	SLP	SLP-LANGEBIO_IMSS_1333	EPI_ISL_2942476	B.1.1.7	2021-06-24
Mexico|SLP-LANGEBIO_IMSS_1334|EPI_ISL_2942477|B.1.1.7|2021-06-24	Mexico	SLP	SLP-LANGEBIO_IMSS_1334	EPI_ISL_2942477	B.1.1.7	2021-06-24
Mexico|TAB-InDRE_FB18408_S4147|EPI_ISL_2920718|B.1.1.7|2021-06-24	Mexico	TAB	TAB-InDRE_FB18408_S4147	EPI_ISL_2920718	B.1.1.7	2021-06-24
Mexico|TAB-LANGEBIO_IMSS_1539|EPI_ISL_2942650|B.1.1.7|2021-06-24	Mexico	TAB	TAB-LANGEBIO_IMSS_1539	EPI_ISL_2942650	B.1.1.7	2021-06-24
Mexico|SIN-CIAD-CLN_F0865|EPI_ISL_2987694|B.1.1.7|2021-06-25	Mexico	SIN	SIN-CIAD-CLN_F0865	EPI_ISL_2987694	B.1.1.7	2021-06-25
Mexico|TAB-InDRE_FB18527_S4151|EPI_ISL_2920722|B.1.1.7|2021-06-25	Mexico	TAB	TAB-InDRE_FB18527_S4151	EPI_ISL_2920722	B.1.1.7	2021-06-25
Mexico|TAB-InDRE_FB18526_S4150|EPI_ISL_2920721|B.1.1.7|2021-06-25	Mexico	TAB	TAB-InDRE_FB18526_S4150	EPI_ISL_2920721	B.1.1.7	2021-06-25
Mexico|CAM-LANGEBIO_IMSS_1571|EPI_ISL_2942682|B.1.1.7|2021-06-26	Mexico	CAM	CAM-LANGEBIO_IMSS_1571	EPI_ISL_2942682	B.1.1.7	2021-06-26
Mexico|CMX-INMEGEN-16-21|EPI_ISL_2978376|B.1.1.7|2021-06-26	Mexico	CMX	CMX-INMEGEN-16-21	EPI_ISL_2978376	B.1.1.7	2021-06-26
Mexico|ROO-LANGEBIO_IMSS_1545|EPI_ISL_2942656|B.1.1.7|2021-06-26	Mexico	ROO	ROO-LANGEBIO_IMSS_1545	EPI_ISL_2942656	B.1.1.7	2021-06-26
Mexico|TAM-LANGEBIO_IMSS_1671|EPI_ISL_2942764|B.1.1.7|2021-06-26	Mexico	TAM	TAM-LANGEBIO_IMSS_1671	EPI_ISL_2942764	B.1.1.7	2021-06-26
Mexico|MEX-INMEGEN-06-04-375|EPI_ISL_2894414|B.1.1.7|2021-06-28	Mexico	MEX	MEX-INMEGEN-06-04-375	EPI_ISL_2894414	B.1.1.7	2021-06-28
Mexico|NLE-LANGEBIO_IMSS_1666|EPI_ISL_2942762|B.1.1.7|2021-06-28	Mexico	NLE	NLE-LANGEBIO_IMSS_1666	EPI_ISL_2942762	B.1.1.7	2021-06-28
Mexico|TAB-InDRE_FB19065_S4488|EPI_ISL_3033342|B.1.1.7|2021-06-28	Mexico	TAB	TAB-InDRE_FB19065_S4488	EPI_ISL_3033342	B.1.1.7	2021-06-28
Mexico|TAB-InDRE_FB19070_S4489|EPI_ISL_3033343|B.1.1.7|2021-06-28	Mexico	TAB	TAB-InDRE_FB19070_S4489	EPI_ISL_3033343	B.1.1.7	2021-06-28
Mexico|TAB-InDRE_FB19071_S4490|EPI_ISL_3033344|B.1.1.7|2021-06-28	Mexico	TAB	TAB-InDRE_FB19071_S4490	EPI_ISL_3033344	B.1.1.7	2021-06-28
Mexico|TAB-InDRE_FB19319_S4504|EPI_ISL_3033358|B.1.1.7|2021-06-29	Mexico	TAB	TAB-InDRE_FB19319_S4504	EPI_ISL_3033358	B.1.1.7	2021-06-29
Mexico|TAB-InDRE_FB19485_S4510|EPI_ISL_3033363|B.1.1.7|2021-06-29	Mexico	TAB	TAB-InDRE_FB19485_S4510	EPI_ISL_3033363	B.1.1.7	2021-06-29
Mexico|NLE-LANGEBIO_IMSS_1680|EPI_ISL_2942771|B.1.1.7|2021-07-01	Mexico	NLE	NLE-LANGEBIO_IMSS_1680	EPI_ISL_2942771	B.1.1.7	2021-07-01
Mexico|TAB-InDRE_FB19500_S4511|EPI_ISL_3033364|B.1.1.7|2021-07-01	Mexico	TAB	TAB-InDRE_FB19500_S4511	EPI_ISL_3033364	B.1.1.7	2021-07-01
Mexico|NLE-LANGEBIO_IMSS_1688|EPI_ISL_2942778|B.1.1.7|2021-07-02	Mexico	NLE	NLE-LANGEBIO_IMSS_1688	EPI_ISL_2942778	B.1.1.7	2021-07-02
USA|CA-CDC-LC0096638|EPI_ISL_3113035|B.1.1.7|2021-07-02	USA	Other	CA-CDC-LC0096638	EPI_ISL_3113035	B.1.1.7	2021-07-02
USA|CA-Curative-679800964041|EPI_ISL_2942069|B.1.1.7|2021-07-02	USA	Other	CA-Curative-679800964041	EPI_ISL_2942069	B.1.1.7	2021-07-02
USA|FL-CDC-QDX26489148|EPI_ISL_3114443|B.1.1.7|2021-07-02	USA	Other	FL-CDC-QDX26489148	EPI_ISL_3114443	B.1.1.7	2021-07-02
USA|FL-BPHL-5414|EPI_ISL_3100838|B.1.1.7|2021-07-02	USA	Other	FL-BPHL-5414	EPI_ISL_3100838	B.1.1.7	2021-07-02
USA|LA-BIE-LSUH000953|EPI_ISL_2966618|B.1.1.7|2021-07-02	USA	Other	LA-BIE-LSUH000953	EPI_ISL_2966618	B.1.1.7	2021-07-02
USA|WA-CDC-UW21070248052|EPI_ISL_2967745|B.1.1.7|2021-07-02	USA	Other	WA-CDC-UW21070248052	EPI_ISL_2967745	B.1.1.7	2021-07-02
USA|AK-PHL9989|EPI_ISL_3118635|B.1.1.7|2021-07-04	USA	Other	AK-PHL9989	EPI_ISL_3118635	B.1.1.7	2021-07-04
USA|MD-HP07317-PIDONHRKYF|EPI_ISL_3098585|B.1.1.7|2021-07-04	USA	Other	MD-HP07317-PIDONHRKYF	EPI_ISL_3098585	B.1.1.7	2021-07-04
Mexico|CMX-INMEGEN-16-75|EPI_ISL_2978423|B.1.1.7|2021-07-05	Mexico	CMX	CMX-INMEGEN-16-75	EPI_ISL_2978423	B.1.1.7	2021-07-05
Mexico|MEX-INMEGEN-16-263|EPI_ISL_2978577|B.1.1.7|2021-07-05	Mexico	MEX	MEX-INMEGEN-16-263	EPI_ISL_2978577	B.1.1.7	2021-07-05
USA|GA-CDC-LC0093992|EPI_ISL_3111459|B.1.1.7|2021-07-05	USA	Other	GA-CDC-LC0093992	EPI_ISL_3111459	B.1.1.7	2021-07-05
USA|MD-MDH-3176|EPI_ISL_3020135|B.1.1.7|2021-07-05	USA	Other	MD-MDH-3176	EPI_ISL_3020135	B.1.1.7	2021-07-05
USA|WA-S9599|EPI_ISL_3142979|B.1.1.7|2021-07-05	USA	Other	WA-S9599	EPI_ISL_3142979	B.1.1.7	2021-07-05
USA|TX-CDC-LC0097388|EPI_ISL_3113584|B.1.1.7|2021-07-06	USA	Other	TX-CDC-LC0097388	EPI_ISL_3113584	B.1.1.7	2021-07-06
USA|MD-MDH-3175|EPI_ISL_3020134|B.1.1.7|2021-07-07	USA	Other	MD-MDH-3175	EPI_ISL_3020134	B.1.1.7	2021-07-07
USA|MO-MSPHL-002934|EPI_ISL_3065559|B.1.1.7|2021-07-07	USA	Other	MO-MSPHL-002934	EPI_ISL_3065559	B.1.1.7	2021-07-07
USA|MT-MTPHL-3832062|EPI_ISL_2943212|B.1.1.7|2021-07-07	USA	Other	MT-MTPHL-3832062	EPI_ISL_2943212	B.1.1.7	2021-07-07
USA|OR-CDC-UW21070785764|EPI_ISL_3063495|B.1.1.7|2021-07-07	USA	Other	OR-CDC-UW21070785764	EPI_ISL_3063495	B.1.1.7	2021-07-07
USA|TX-BSWTemple-ILL-R15-0023|EPI_ISL_3031584|B.1.1.7|2021-07-08	USA	Other	TX-BSWTemple-ILL-R15-0023	EPI_ISL_3031584	B.1.1.7	2021-07-08
USA|MA-CDCBI-CRSP_CEVOMK5BUW6ZU5FD|EPI_ISL_3084730|B.1.1.7|2021-07-09	USA	Other	MA-CDCBI-CRSP_CEVOMK5BUW6ZU5FD	EPI_ISL_3084730	B.1.1.7	2021-07-09
Aruba|AW-RIVM-44233|EPI_ISL_3057856|B.1.1.7|2021-07-10	Aruba	Other	AW-RIVM-44233	EPI_ISL_3057856	B.1.1.7	2021-07-10
USA|LA-BIE-LSUH001089|EPI_ISL_3010249|B.1.1.7|2021-07-11	USA	Other	LA-BIE-LSUH001089	EPI_ISL_3010249	B.1.1.7	2021-07-11
USA|LA-EVTL3386|EPI_ISL_3115198|B.1.1.7|2021-07-12	USA	Other	LA-EVTL3386	EPI_ISL_3115198	B.1.1.7	2021-07-12
USA|LA-BIE-LSUH001383|EPI_ISL_3088925|B.1.1.7|2021-07-14	USA	Other	LA-BIE-LSUH001383	EPI_ISL_3088925	B.1.1.7	2021-07-14
USA|NY-PRL-2021_0719_00D05|EPI_ISL_3071933|B.1.1.7|2021-07-14	USA	Other	NY-PRL-2021_0719_00D05	EPI_ISL_3071933	B.1.1.7	2021-07-14

## Sheet: C1_P1
Name	Country	State	ID	GSAID	Lineage	Date
Mexico|PUE-IBT-IMSS-625|EPI_ISL_1416455|P.1|2021-03-07	Mexico	PUE	PUE-IBT-IMSS-625	EPI_ISL_1416455	P.1	2021-03-07
Mexico|CMX-InDRE_F33640_S909|EPI_ISL_1469941|P.1|2021-03-15	Mexico	CMX	CMX-InDRE_F33640_S909	EPI_ISL_1469941	P.1	2021-03-15
Mexico|CMX_LANGEBIO_IMSS_0482|EPI_ISL_1662023|P.1|2021-03-29	Mexico	CMX	CMX_LANGEBIO_IMSS_0482	EPI_ISL_1662023	P.1	2021-03-29
Mexico|JAL_LANGEBIO_IMSS_0365|EPI_ISL_1662101|P.1|2021-03-29	Mexico	JAL	JAL_LANGEBIO_IMSS_0365	EPI_ISL_1662101	P.1	2021-03-29
Mexico|CMX-INMEGEN-InDRE-04-04-105|EPI_ISL_1628603|P.1|2021-04-02	Mexico	CMX	CMX-INMEGEN-InDRE-04-04-105	EPI_ISL_1628603	P.1	2021-04-02
USA|DE-DHSS-B1078450|EPI_ISL_1909076|P.1|2021-04-06	USA	DE-USA	DE-DHSS-B1078450	EPI_ISL_1909076	P.1	2021-04-06
Mexico|NLE-InDRE_FB13089_S1522|EPI_ISL_1805500|P.1|2021-04-07	Mexico	NLE	NLE-InDRE_FB13089_S1522	EPI_ISL_1805500	P.1	2021-04-07
Mexico|CMX-INER-INMEGEN-00139|EPI_ISL_1824485|P.1|2021-04-08	Mexico	CMX	CMX-INER-INMEGEN-00139	EPI_ISL_1824485	P.1	2021-04-08
Mexico|PUE_IBT_IMSS_97891-NC|EPI_ISL_3091094|P.1|2021-04-08	Mexico	PUE	PUE_IBT_IMSS_97891-NC	EPI_ISL_3091094	P.1	2021-04-08
Mexico|CMX-InDRE_FD49151_S2107|EPI_ISL_2296079|P.1|2021-04-12	Mexico	CMX	CMX-InDRE_FD49151_S2107	EPI_ISL_2296079	P.1	2021-04-12
Mexico|CMX-InDRE_FD49213_S2108|EPI_ISL_2296080|P.1|2021-04-12	Mexico	CMX	CMX-InDRE_FD49213_S2108	EPI_ISL_2296080	P.1	2021-04-12
Mexico|CMX-INMEGEN-04-05-45|EPI_ISL_1711293|P.1.12|2021-04-13	Mexico	CMX	CMX-INMEGEN-04-05-45	EPI_ISL_1711293	P.1.12	2021-04-13
Mexico|JAL_INER_IMSS_00861|EPI_ISL_2091312|P.1|2021-04-14	Mexico	JAL	JAL_INER_IMSS_00861	EPI_ISL_2091312	P.1	2021-04-14
USA|OR-CDC-ASC210069866|EPI_ISL_2000370|P.1|2021-04-14	USA	OR-USA	OR-CDC-ASC210069866	EPI_ISL_2000370	P.1	2021-04-14
Mexico|JAL_INER_IMSS_00866|EPI_ISL_2091317|P.1|2021-04-15	Mexico	JAL	JAL_INER_IMSS_00866	EPI_ISL_2091317	P.1	2021-04-15
Mexico|PUE_LANGEBIO_IMSS_0769|EPI_ISL_2402180|P.1|2021-04-18	Mexico	PUE	PUE_LANGEBIO_IMSS_0769	EPI_ISL_2402180	P.1	2021-04-18
Mexico|CMX-INER-INMEGEN-00169|EPI_ISL_2160668|P.1|2021-04-19	Mexico	CMX	CMX-INER-INMEGEN-00169	EPI_ISL_2160668	P.1	2021-04-19
Mexico|GUA-InDRE_FB13873_S2097|EPI_ISL_2296069|P.1|2021-04-19	Mexico	GUA	GUA-InDRE_FB13873_S2097	EPI_ISL_2296069	P.1	2021-04-19
Mexico|SON_LANGEBIO_IMSS_0742|EPI_ISL_2402153|P.1|2021-04-19	Mexico	SON	SON_LANGEBIO_IMSS_0742	EPI_ISL_2402153	P.1	2021-04-19
Mexico|GUA-InDRE_FB13896_S1779|EPI_ISL_2105685|P.1|2021-04-20	Mexico	GUA	GUA-InDRE_FB13896_S1779	EPI_ISL_2105685	P.1	2021-04-20
Mexico|GUA-InDRE_FB13895_S1778|EPI_ISL_2105684|P.1|2021-04-20	Mexico	GUA	GUA-InDRE_FB13895_S1778	EPI_ISL_2105684	P.1	2021-04-20
Mexico|JAL-InDRE_FB13968_S2098|EPI_ISL_2296070|P.1|2021-04-21	Mexico	JAL	JAL-InDRE_FB13968_S2098	EPI_ISL_2296070	P.1	2021-04-21
Mexico|ZAC_LANGEBIO_IMSS_0660|EPI_ISL_2402076|P.1|2021-04-21	Mexico	ZAC	ZAC_LANGEBIO_IMSS_0660	EPI_ISL_2402076	P.1	2021-04-21
Mexico|CMX-InDRE_FB14153_S1788|EPI_ISL_2105694|P.1|2021-04-22	Mexico	CMX	CMX-InDRE_FB14153_S1788	EPI_ISL_2105694	P.1	2021-04-22
Mexico|CMX_IBT_IMSS_1208|EPI_ISL_2391610|P.1|2021-04-25	Mexico	CMX	CMX_IBT_IMSS_1208	EPI_ISL_2391610	P.1	2021-04-25
USA|OR-OHSU-11486|EPI_ISL_2462136|P.1|2021-04-26	USA	OR-USA	OR-OHSU-11486	EPI_ISL_2462136	P.1	2021-04-26
Mexico|CMX-INMEGEN-05-01-96|EPI_ISL_2230897|P.1|2021-04-28	Mexico	CMX	CMX-INMEGEN-05-01-96	EPI_ISL_2230897	P.1	2021-04-28
Mexico|CMX-InDRE_FB14553_S2088|EPI_ISL_2296060|P.1|2021-04-29	Mexico	CMX	CMX-InDRE_FB14553_S2088	EPI_ISL_2296060	P.1	2021-04-29
Mexico|JAL_LANGEBIO_IMSS_0760|EPI_ISL_2402171|P.1|2021-04-29	Mexico	JAL	JAL_LANGEBIO_IMSS_0760	EPI_ISL_2402171	P.1	2021-04-29
Mexico|CMX_IBT_IMSS_1140|EPI_ISL_2391711|P.1|2021-04-30	Mexico	CMX	CMX_IBT_IMSS_1140	EPI_ISL_2391711	P.1	2021-04-30
Mexico|GUA-InDRE_FB14642_S2121|EPI_ISL_2296093|P.1|2021-04-30	Mexico	GUA	GUA-InDRE_FB14642_S2121	EPI_ISL_2296093	P.1	2021-04-30
Mexico|HID-INMEGEN-05-02-157|EPI_ISL_2230903|P.1|2021-04-30	Mexico	HID	HID-INMEGEN-05-02-157	EPI_ISL_2230903	P.1	2021-04-30
USA|OR-OHSU-11656|EPI_ISL_2462288|P.1|2021-04-30	USA	OR-USA	OR-OHSU-11656	EPI_ISL_2462288	P.1	2021-04-30
Mexico|MOR-InDRE_FB14772_S2122|EPI_ISL_2296094|P.1|2021-05-02	Mexico	MOR	MOR-InDRE_FB14772_S2122	EPI_ISL_2296094	P.1	2021-05-02
USA|NC-CDC-LC0058213|EPI_ISL_2184325|P.1|2021-05-02	USA	NC-USA	NC-CDC-LC0058213	EPI_ISL_2184325	P.1	2021-05-02
USA|OR-OHSU-211800421|EPI_ISL_3065601|P.1|2021-05-02	USA	OR-USA	OR-OHSU-211800421	EPI_ISL_3065601	P.1	2021-05-02
Mexico|GUA-InDRE_FB14813_S3169|EPI_ISL_2674656|P.1|2021-05-03	Mexico	GUA	GUA-InDRE_FB14813_S3169	EPI_ISL_2674656	P.1	2021-05-03
Mexico|MEX-INMEGEN-05-01-343|EPI_ISL_2105848|P.1|2021-05-03	Mexico	MEX	MEX-INMEGEN-05-01-343	EPI_ISL_2105848	P.1	2021-05-03
Mexico|MEX-INMEGEN-05-01-342|EPI_ISL_2105847|P.1|2021-05-03	Mexico	MEX	MEX-INMEGEN-05-01-342	EPI_ISL_2105847	P.1	2021-05-03
Mexico|MEX-INMEGEN-05-01-354|EPI_ISL_2105857|P.1|2021-05-03	Mexico	MEX	MEX-INMEGEN-05-01-354	EPI_ISL_2105857	P.1	2021-05-03
Mexico|QUE-InDRE_FB15729_S2934|EPI_ISL_2545682|P.1|2021-05-03	Mexico	QUE	QUE-InDRE_FB15729_S2934	EPI_ISL_2545682	P.1	2021-05-03
USA|FL-BPHL-3310|EPI_ISL_2277974|P.1|2021-05-04	USA	FL-USA	FL-BPHL-3310	EPI_ISL_2277974	P.1	2021-05-04
Mexico|GUA-InDRE_FB14818_S2497|EPI_ISL_2476424|P.1|2021-05-05	Mexico	GUA	GUA-InDRE_FB14818_S2497	EPI_ISL_2476424	P.1	2021-05-05
Mexico|CMX-InDRE_FD62935_S2104|EPI_ISL_2296076|P.1|2021-05-06	Mexico	CMX	CMX-InDRE_FD62935_S2104	EPI_ISL_2296076	P.1	2021-05-06
Mexico|CMX-InDRE_FD63364_S2102|EPI_ISL_2296074|P.1|2021-05-06	Mexico	CMX	CMX-InDRE_FD63364_S2102	EPI_ISL_2296074	P.1	2021-05-06
Mexico|CMX-InDRE_FD62911_S2106|EPI_ISL_2296078|P.1|2021-05-06	Mexico	CMX	CMX-InDRE_FD62911_S2106	EPI_ISL_2296078	P.1	2021-05-06
USA|OR-OHSU-11795|EPI_ISL_2663723|P.1|2021-05-06	USA	OR-USA	OR-OHSU-11795	EPI_ISL_2663723	P.1	2021-05-06
Mexico|HID-InDRE_FB16140_S2608|EPI_ISL_2479911|P.1.12|2021-05-07	Mexico	HID	HID-InDRE_FB16140_S2608	EPI_ISL_2479911	P.1.12	2021-05-07
Mexico|MOR-InDRE_FB14791_S2513|EPI_ISL_2476440|P.1|2021-05-07	Mexico	MOR	MOR-InDRE_FB14791_S2513	EPI_ISL_2476440	P.1	2021-05-07
Mexico|SIN-CIAD-MZT_ID2836|EPI_ISL_2987712|P.1|2021-05-07	Mexico	SIN	SIN-CIAD-MZT_ID2836	EPI_ISL_2987712	P.1	2021-05-07
Mexico|MEX-INMEGEN-05-03-83|EPI_ISL_2319238|P.1|2021-05-08	Mexico	MEX	MEX-INMEGEN-05-03-83	EPI_ISL_2319238	P.1	2021-05-08
Mexico|MEX-INMEGEN-05-03-75|EPI_ISL_2319231|P.1.12|2021-05-08	Mexico	MEX	MEX-INMEGEN-05-03-75	EPI_ISL_2319231	P.1.12	2021-05-08
Mexico|MEX-INMEGEN-05-03-81|EPI_ISL_2319236|P.1|2021-05-08	Mexico	MEX	MEX-INMEGEN-05-03-81	EPI_ISL_2319236	P.1	2021-05-08
Mexico|MEX-INMEGEN-05-03-77|EPI_ISL_2319233|P.1|2021-05-08	Mexico	MEX	MEX-INMEGEN-05-03-77	EPI_ISL_2319233	P.1	2021-05-08
Mexico|JAL_INER_IMSS_1174|EPI_ISL_2490382|P.1|2021-05-09	Mexico	JAL	JAL_INER_IMSS_1174	EPI_ISL_2490382	P.1	2021-05-09
Mexico|CMX-INMEGEN-INDRE-05-03-199|EPI_ISL_2319321|P.1|2021-05-10	Mexico	CMX	CMX-INMEGEN-INDRE-05-03-199	EPI_ISL_2319321	P.1	2021-05-10
Mexico|GRO_INER_IMSS_1284|EPI_ISL_2490391|P.1|2021-05-10	Mexico	GRO	GRO_INER_IMSS_1284	EPI_ISL_2490391	P.1	2021-05-10
Mexico|JAL_INER_IMSS_1178|EPI_ISL_2490383|P.1|2021-05-10	Mexico	JAL	JAL_INER_IMSS_1178	EPI_ISL_2490383	P.1	2021-05-10
Mexico|JAL_INER_IMSS_1179|EPI_ISL_2490384|P.1|2021-05-10	Mexico	JAL	JAL_INER_IMSS_1179	EPI_ISL_2490384	P.1	2021-05-10
Mexico|SLP_INER_IMSS_1229|EPI_ISL_2490386|P.1|2021-05-10	Mexico	SLP	SLP_INER_IMSS_1229	EPI_ISL_2490386	P.1	2021-05-10
Mexico|HID-INMEGEN-05-04-24|EPI_ISL_2349902|P.1|2021-05-11	Mexico	HID	HID-INMEGEN-05-04-24	EPI_ISL_2349902	P.1	2021-05-11
Mexico|MEX-INMEGEN-05-04-2|EPI_ISL_2349882|P.1|2021-05-11	Mexico	MEX	MEX-INMEGEN-05-04-2	EPI_ISL_2349882	P.1	2021-05-11
Mexico|MEX-INMEGEN-05-04-4|EPI_ISL_2349884|P.1|2021-05-11	Mexico	MEX	MEX-INMEGEN-05-04-4	EPI_ISL_2349884	P.1	2021-05-11
Mexico|MEX_INER_IMSS_1264|EPI_ISL_2490388|P.1|2021-05-11	Mexico	MEX	MEX_INER_IMSS_1264	EPI_ISL_2490388	P.1	2021-05-11
Mexico|CMX-INMEGEN-INDRE-05-03-237|EPI_ISL_2319349|P.1|2021-05-12	Mexico	CMX	CMX-INMEGEN-INDRE-05-03-237	EPI_ISL_2319349	P.1	2021-05-12
Mexico|CMX-INMEGEN-INDRE-05-03-263|EPI_ISL_2319369|P.1|2021-05-13	Mexico	CMX	CMX-INMEGEN-INDRE-05-03-263	EPI_ISL_2319369	P.1	2021-05-13
Mexico|CMX-INMEGEN-05-04-158|EPI_ISL_2349995|P.1.12|2021-05-13	Mexico	CMX	CMX-INMEGEN-05-04-158	EPI_ISL_2349995	P.1.12	2021-05-13
Mexico|CMX-INMEGEN-INDRE-05-03-264|EPI_ISL_2319370|P.1|2021-05-13	Mexico	CMX	CMX-INMEGEN-INDRE-05-03-264	EPI_ISL_2319370	P.1	2021-05-13
Mexico|CMX-INMEGEN-05-04-160|EPI_ISL_2349997|P.1.12|2021-05-13	Mexico	CMX	CMX-INMEGEN-05-04-160	EPI_ISL_2349997	P.1.12	2021-05-13
Mexico|MEX-INMEGEN-05-04-93|EPI_ISL_2349951|P.1|2021-05-13	Mexico	MEX	MEX-INMEGEN-05-04-93	EPI_ISL_2349951	P.1	2021-05-13
Mexico|MEX-INMEGEN-05-04-288|EPI_ISL_2350085|P.1|2021-05-13	Mexico	MEX	MEX-INMEGEN-05-04-288	EPI_ISL_2350085	P.1	2021-05-13
USA|OR-OHSU-11907|EPI_ISL_2838829|P.1|2021-05-13	USA	OR-USA	OR-OHSU-11907	EPI_ISL_2838829	P.1	2021-05-13
Mexico|CMX-InDRE_FD68564_S2501|EPI_ISL_2476428|P.1|2021-05-14	Mexico	CMX	CMX-InDRE_FD68564_S2501	EPI_ISL_2476428	P.1	2021-05-14
Mexico|CMX-InDRE_FD68563_S2485|EPI_ISL_2476412|P.1|2021-05-14	Mexico	CMX	CMX-InDRE_FD68563_S2485	EPI_ISL_2476412	P.1	2021-05-14
Mexico|COL-InDRE_FB16096_S2511|EPI_ISL_2476438|P.1|2021-05-14	Mexico	COL	COL-InDRE_FB16096_S2511	EPI_ISL_2476438	P.1	2021-05-14
Mexico|GUA-InDRE_FB16203_S2491|EPI_ISL_2476418|P.1|2021-05-14	Mexico	GUA	GUA-InDRE_FB16203_S2491	EPI_ISL_2476418	P.1	2021-05-14
Mexico|AGU-LANGEBIO_IMSS_0995|EPI_ISL_2671483|P.1|2021-05-17	Mexico	AGU	AGU-LANGEBIO_IMSS_0995	EPI_ISL_2671483	P.1	2021-05-17
Mexico|CMX_IBT_IMSS_1500|EPI_ISL_2681332|P.1|2021-05-17	Mexico	CMX	CMX_IBT_IMSS_1500	EPI_ISL_2681332	P.1	2021-05-17
Mexico|CMX-InDRE_FD71328_S2947|EPI_ISL_2545695|P.1|2021-05-17	Mexico	CMX	CMX-InDRE_FD71328_S2947	EPI_ISL_2545695	P.1	2021-05-17
Mexico|CMX-INMEGEN-05-04-242|EPI_ISL_2350055|P.1.12|2021-05-17	Mexico	CMX	CMX-INMEGEN-05-04-242	EPI_ISL_2350055	P.1.12	2021-05-17
Mexico|CMX-INMEGEN-05-04-367|EPI_ISL_2350133|P.1|2021-05-17	Mexico	CMX	CMX-INMEGEN-05-04-367	EPI_ISL_2350133	P.1	2021-05-17
Mexico|CMX-INMEGEN-05-04-333|EPI_ISL_2350113|P.1.12|2021-05-17	Mexico	CMX	CMX-INMEGEN-05-04-333	EPI_ISL_2350113	P.1.12	2021-05-17
Mexico|GUA-InDRE_FB16207_S2492|EPI_ISL_2476419|P.1|2021-05-17	Mexico	GUA	GUA-InDRE_FB16207_S2492	EPI_ISL_2476419	P.1	2021-05-17
Mexico|MIC-InDRE_FB17047_S3154|EPI_ISL_2674641|P.1|2021-05-17	Mexico	MIC	MIC-InDRE_FB17047_S3154	EPI_ISL_2674641	P.1	2021-05-17
Mexico|OAX-InDRE_FB15916_S2482|EPI_ISL_2476430|P.1|2021-05-17	Mexico	OAX	OAX-InDRE_FB15916_S2482	EPI_ISL_2476430	P.1	2021-05-17
Mexico|GUA-InDRE_FB16212_S2494|EPI_ISL_2476421|P.1|2021-05-18	Mexico	GUA	GUA-InDRE_FB16212_S2494	EPI_ISL_2476421	P.1	2021-05-18
USA|OR-OSPHL01047|EPI_ISL_2727477|P.1|2021-05-18	USA	OR-USA	OR-OSPHL01047	EPI_ISL_2727477	P.1	2021-05-18
Mexico|CMX-INMEGEN-05-05-196|EPI_ISL_2444516|P.1|2021-05-20	Mexico	CMX	CMX-INMEGEN-05-05-196	EPI_ISL_2444516	P.1	2021-05-20
Mexico|CMX-InDRE_FD71731_S2948|EPI_ISL_2545696|P.1|2021-05-20	Mexico	CMX	CMX-InDRE_FD71731_S2948	EPI_ISL_2545696	P.1	2021-05-20
Mexico|COL-LANGEBIO_IMSS_1021|EPI_ISL_2671553|P.1|2021-05-20	Mexico	COL	COL-LANGEBIO_IMSS_1021	EPI_ISL_2671553	P.1	2021-05-20
Mexico|HID-INMEGEN-05-05-211|EPI_ISL_2444524|P.1|2021-05-20	Mexico	HID	HID-INMEGEN-05-05-211	EPI_ISL_2444524	P.1	2021-05-20
Mexico|HID-INMEGEN-05-05-219|EPI_ISL_2444531|P.1.12|2021-05-20	Mexico	HID	HID-INMEGEN-05-05-219	EPI_ISL_2444531	P.1.12	2021-05-20
Mexico|MEX-INMEGEN-05-05-198|EPI_ISL_2444518|P.1|2021-05-20	Mexico	MEX	MEX-INMEGEN-05-05-198	EPI_ISL_2444518	P.1	2021-05-20
Mexico|MEX-INMEGEN-05-05-221|EPI_ISL_2444533|P.1|2021-05-20	Mexico	MEX	MEX-INMEGEN-05-05-221	EPI_ISL_2444533	P.1	2021-05-20
Mexico|MEX-INMEGEN-05-05-199|EPI_ISL_2444519|P.1.12|2021-05-20	Mexico	MEX	MEX-INMEGEN-05-05-199	EPI_ISL_2444519	P.1.12	2021-05-20
Mexico|CMX-InDRE_FD72370_S2949|EPI_ISL_2545697|P.1|2021-05-21	Mexico	CMX	CMX-InDRE_FD72370_S2949	EPI_ISL_2545697	P.1	2021-05-21
Mexico|HID-LANGEBIO_IMSS_1141|EPI_ISL_2671569|P.1|2021-05-21	Mexico	HID	HID-LANGEBIO_IMSS_1141	EPI_ISL_2671569	P.1	2021-05-21
Mexico|MEX-INMEGEN-05-05-109|EPI_ISL_2444467|P.1.12|2021-05-21	Mexico	MEX	MEX-INMEGEN-05-05-109	EPI_ISL_2444467	P.1.12	2021-05-21
Mexico|CMX-INER-INMEGEN-00230|EPI_ISL_2646131|P.1|2021-05-22	Mexico	CMX	CMX-INER-INMEGEN-00230	EPI_ISL_2646131	P.1	2021-05-22
Mexico|CMX-INMEGEN-05-05-6|EPI_ISL_2444402|P.1|2021-05-22	Mexico	CMX	CMX-INMEGEN-05-05-6	EPI_ISL_2444402	P.1	2021-05-22
Mexico|MEX-INMEGEN-05-05-52|EPI_ISL_2444433|P.1.12|2021-05-22	Mexico	MEX	MEX-INMEGEN-05-05-52	EPI_ISL_2444433	P.1.12	2021-05-22
USA|OR-OHSU-212070503|EPI_ISL_3561840|P.1|2021-05-22	USA	OR-USA	OR-OHSU-212070503	EPI_ISL_3561840	P.1	2021-05-22
Mexico|CMX-INMEGEN-05-06-19|EPI_ISL_2603609|P.1.12|2021-05-24	Mexico	CMX	CMX-INMEGEN-05-06-19	EPI_ISL_2603609	P.1.12	2021-05-24
Mexico|GUA-InDRE_FB16455_S3542|EPI_ISL_2779057|P.1|2021-05-24	Mexico	GUA	GUA-InDRE_FB16455_S3542	EPI_ISL_2779057	P.1	2021-05-24
Mexico|HID-InDRE_FB17211_S3174|EPI_ISL_2674661|P.1|2021-05-24	Mexico	HID	HID-InDRE_FB17211_S3174	EPI_ISL_2674661	P.1	2021-05-24
Mexico|JAL-LANGEBIO_IMSS_1022|EPI_ISL_2671575|P.1|2021-05-24	Mexico	JAL	JAL-LANGEBIO_IMSS_1022	EPI_ISL_2671575	P.1	2021-05-24
Mexico|JAL-InDRE_FB16239_S2935|EPI_ISL_2545683|P.1.10|2021-05-24	Mexico	JAL	JAL-InDRE_FB16239_S2935	EPI_ISL_2545683	P.1.10	2021-05-24
Mexico|JAL-LANGEBIO_IMSS_1023|EPI_ISL_2671576|P.1|2021-05-25	Mexico	JAL	JAL-LANGEBIO_IMSS_1023	EPI_ISL_2671576	P.1	2021-05-25
Mexico|CMX-INMEGEN-05-06-31|EPI_ISL_2603618|P.1.12|2021-05-26	Mexico	CMX	CMX-INMEGEN-05-06-31	EPI_ISL_2603618	P.1.12	2021-05-26
Mexico|CMX-INMEGEN-06-02-306|EPI_ISL_2692797|P.1|2021-05-26	Mexico	CMX	CMX-INMEGEN-06-02-306	EPI_ISL_2692797	P.1	2021-05-26
Mexico|CMX-INMEGEN-05-06-33|EPI_ISL_2603620|P.1|2021-05-26	Mexico	CMX	CMX-INMEGEN-05-06-33	EPI_ISL_2603620	P.1	2021-05-26
Mexico|GUA-InDRE_FB16474_S3606|EPI_ISL_2800917|P.1|2021-05-26	Mexico	GUA	GUA-InDRE_FB16474_S3606	EPI_ISL_2800917	P.1	2021-05-26
Mexico|HID-InDRE_FB17215_S3175|EPI_ISL_2674662|P.1|2021-05-26	Mexico	HID	HID-InDRE_FB17215_S3175	EPI_ISL_2674662	P.1	2021-05-26
Mexico|CMX-INMEGEN-05-06-63|EPI_ISL_2603638|P.1.10|2021-05-27	Mexico	CMX	CMX-INMEGEN-05-06-63	EPI_ISL_2603638	P.1.10	2021-05-27
Mexico|CMX-INMEGEN-05-06-49|EPI_ISL_2603631|P.1.12|2021-05-27	Mexico	CMX	CMX-INMEGEN-05-06-49	EPI_ISL_2603631	P.1.12	2021-05-27
Mexico|JAL-LANGEBIO_IMSS_1037|EPI_ISL_2671583|P.1|2021-05-27	Mexico	JAL	JAL-LANGEBIO_IMSS_1037	EPI_ISL_2671583	P.1	2021-05-27
Mexico|JAL-LANGEBIO_IMSS_1034|EPI_ISL_2671582|P.1|2021-05-27	Mexico	JAL	JAL-LANGEBIO_IMSS_1034	EPI_ISL_2671582	P.1	2021-05-27
Mexico|MEX-INMEGEN-05-06-263|EPI_ISL_2603733|P.1|2021-05-27	Mexico	MEX	MEX-INMEGEN-05-06-263	EPI_ISL_2603733	P.1	2021-05-27
Mexico|CMX-IBT_IMSS_1902|EPI_ISL_2801769|P.1|2021-05-28	Mexico	CMX	CMX-IBT_IMSS_1902	EPI_ISL_2801769	P.1	2021-05-28
Mexico|CMX-INMEGEN-05-06-256|EPI_ISL_2603727|P.1.12|2021-05-28	Mexico	CMX	CMX-INMEGEN-05-06-256	EPI_ISL_2603727	P.1.12	2021-05-28
Mexico|HID-InDRE_FB17218_S3178|EPI_ISL_2674665|P.1|2021-05-28	Mexico	HID	HID-InDRE_FB17218_S3178	EPI_ISL_2674665	P.1	2021-05-28
Mexico|HID-InDRE_FB17219_S3179|EPI_ISL_2674666|P.1|2021-05-28	Mexico	HID	HID-InDRE_FB17219_S3179	EPI_ISL_2674666	P.1	2021-05-28
Mexico|JAL-LANGEBIO_IMSS_1039|EPI_ISL_2671585|P.1|2021-05-28	Mexico	JAL	JAL-LANGEBIO_IMSS_1039	EPI_ISL_2671585	P.1	2021-05-28
Mexico|MEX-INMEGEN-05-06-227|EPI_ISL_2603710|P.1|2021-05-28	Mexico	MEX	MEX-INMEGEN-05-06-227	EPI_ISL_2603710	P.1	2021-05-28
Mexico|SON-LANGEBIO_IMSS_1044|EPI_ISL_2671703|P.1|2021-05-28	Mexico	SON	SON-LANGEBIO_IMSS_1044	EPI_ISL_2671703	P.1	2021-05-28
Mexico|CMX_IBT_IMSS_1624|EPI_ISL_2681225|P.1|2021-05-30	Mexico	CMX	CMX_IBT_IMSS_1624	EPI_ISL_2681225	P.1	2021-05-30
Mexico|CMX-INER-IBT-0247|EPI_ISL_2648116|P.1|2021-05-31	Mexico	CMX	CMX-INER-IBT-0247	EPI_ISL_2648116	P.1	2021-05-31
Mexico|CMX-INER-IBT-0248|EPI_ISL_2648117|P.1|2021-05-31	Mexico	CMX	CMX-INER-IBT-0248	EPI_ISL_2648117	P.1	2021-05-31
Mexico|JAL-IBT_IMSS_1837|EPI_ISL_2801712|P.1|2021-05-31	Mexico	JAL	JAL-IBT_IMSS_1837	EPI_ISL_2801712	P.1	2021-05-31
Mexico|MIC-InDRE_FB19236_S4752|EPI_ISL_3033575|P.1|2021-05-31	Mexico	MIC	MIC-InDRE_FB19236_S4752	EPI_ISL_3033575	P.1	2021-05-31
USA|OR-OHSU-12030|EPI_ISL_2838877|P.1|2021-05-31	USA	OR-USA	OR-OHSU-12030	EPI_ISL_2838877	P.1	2021-05-31
Mexico|AGU_IBT_IMSS_1490|EPI_ISL_2681293|P.1|2021-06-01	Mexico	AGU	AGU_IBT_IMSS_1490	EPI_ISL_2681293	P.1	2021-06-01
Mexico|CMX-INMEGEN-06-01-152|EPI_ISL_2616859|P.1.12|2021-06-01	Mexico	CMX	CMX-INMEGEN-06-01-152	EPI_ISL_2616859	P.1.12	2021-06-01
Mexico|HID-InDRE_FB17230_S3185|EPI_ISL_2674672|P.1|2021-06-01	Mexico	HID	HID-InDRE_FB17230_S3185	EPI_ISL_2674672	P.1	2021-06-01
Mexico|SLP_IBT_IMSS_1486|EPI_ISL_2681209|P.1|2021-06-01	Mexico	SLP	SLP_IBT_IMSS_1486	EPI_ISL_2681209	P.1	2021-06-01
Mexico|DUR-InDRE_FB17163_S3155|EPI_ISL_2674642|P.1|2021-06-02	Mexico	DUR	DUR-InDRE_FB17163_S3155	EPI_ISL_2674642	P.1	2021-06-02
Mexico|GUA-InDRE_FB16905_S3206|EPI_ISL_2674693|P.1|2021-06-02	Mexico	GUA	GUA-InDRE_FB16905_S3206	EPI_ISL_2674693	P.1	2021-06-02
Mexico|SON-InDRE_FB17164_S3156|EPI_ISL_2674643|P.1|2021-06-02	Mexico	SON	SON-InDRE_FB17164_S3156	EPI_ISL_2674643	P.1	2021-06-02
Mexico|CMX-INMEGEN-06-03-145|EPI_ISL_2810135|P.1|2021-06-03	Mexico	CMX	CMX-INMEGEN-06-03-145	EPI_ISL_2810135	P.1	2021-06-03
Mexico|PUE-InDRE_FB17004_S3213|EPI_ISL_2674700|P.1|2021-06-03	Mexico	PUE	PUE-InDRE_FB17004_S3213	EPI_ISL_2674700	P.1	2021-06-03
Mexico|SON-IBT_IMSS_1858|EPI_ISL_2801729|P.1|2021-06-03	Mexico	SON	SON-IBT_IMSS_1858	EPI_ISL_2801729	P.1	2021-06-03
Mexico|SON-InDRE_FB17168_S3157|EPI_ISL_2674644|P.1|2021-06-03	Mexico	SON	SON-InDRE_FB17168_S3157	EPI_ISL_2674644	P.1	2021-06-03
Mexico|SON-InDRE_FB17170_S3159|EPI_ISL_2674646|P.1|2021-06-03	Mexico	SON	SON-InDRE_FB17170_S3159	EPI_ISL_2674646	P.1	2021-06-03
Mexico|SON-InDRE_FB17169_S3158|EPI_ISL_2674645|P.1|2021-06-03	Mexico	SON	SON-InDRE_FB17169_S3158	EPI_ISL_2674645	P.1	2021-06-03
Mexico|SON-InDRE_FB17154_S3232|EPI_ISL_2674719|P.1|2021-06-03	Mexico	SON	SON-InDRE_FB17154_S3232	EPI_ISL_2674719	P.1	2021-06-03
Mexico|CMX-INER-IBT-0252|EPI_ISL_2777212|P.1|2021-06-04	Mexico	CMX	CMX-INER-IBT-0252	EPI_ISL_2777212	P.1	2021-06-04
Mexico|HID-InDRE_FB17233_S3188|EPI_ISL_2674675|P.1|2021-06-04	Mexico	HID	HID-InDRE_FB17233_S3188	EPI_ISL_2674675	P.1	2021-06-04
Mexico|JAL-IBT_IMSS_1862|EPI_ISL_2801733|P.1|2021-06-04	Mexico	JAL	JAL-IBT_IMSS_1862	EPI_ISL_2801733	P.1	2021-06-04
Mexico|SON-InDRE_FB17172_S3160|EPI_ISL_2674647|P.1|2021-06-04	Mexico	SON	SON-InDRE_FB17172_S3160	EPI_ISL_2674647	P.1	2021-06-04
Mexico|SON-InDRE_FB17177_S3161|EPI_ISL_2674648|P.1|2021-06-04	Mexico	SON	SON-InDRE_FB17177_S3161	EPI_ISL_2674648	P.1	2021-06-04
Mexico|SON-InDRE_FB17178_S3162|EPI_ISL_2674649|P.1|2021-06-04	Mexico	SON	SON-InDRE_FB17178_S3162	EPI_ISL_2674649	P.1	2021-06-04
Mexico|CMX-INER-IBT-0255|EPI_ISL_2777215|P.1|2021-06-06	Mexico	CMX	CMX-INER-IBT-0255	EPI_ISL_2777215	P.1	2021-06-06
Mexico|HID-InDRE_FB17238_S3190|EPI_ISL_2674677|P.1|2021-06-06	Mexico	HID	HID-InDRE_FB17238_S3190	EPI_ISL_2674677	P.1	2021-06-06
Mexico|JAL-IBT_IMSS_1875|EPI_ISL_2801742|P.1|2021-06-06	Mexico	JAL	JAL-IBT_IMSS_1875	EPI_ISL_2801742	P.1	2021-06-06
Mexico|CMX-INER-IBT-0264|EPI_ISL_2777223|P.1|2021-06-07	Mexico	CMX	CMX-INER-IBT-0264	EPI_ISL_2777223	P.1	2021-06-07
Mexico|CMX-LANGEBIO_IMSS_1462|EPI_ISL_2942581|P.1|2021-06-07	Mexico	CMX	CMX-LANGEBIO_IMSS_1462	EPI_ISL_2942581	P.1	2021-06-07
Mexico|GUA-InDRE_FB17326_S3681|EPI_ISL_2779187|P.1|2021-06-07	Mexico	GUA	GUA-InDRE_FB17326_S3681	EPI_ISL_2779187	P.1	2021-06-07
Mexico|JAL-IBT_IMSS_1867|EPI_ISL_2801736|P.1|2021-06-07	Mexico	JAL	JAL-IBT_IMSS_1867	EPI_ISL_2801736	P.1	2021-06-07
USA|OR-OHSU-12054|EPI_ISL_2838883|P.1|2021-06-07	USA	OR-USA	OR-OHSU-12054	EPI_ISL_2838883	P.1	2021-06-07
Mexico|CMX-LANGEBIO_IMSS_1490|EPI_ISL_2942606|P.1|2021-06-08	Mexico	CMX	CMX-LANGEBIO_IMSS_1490	EPI_ISL_2942606	P.1	2021-06-08
Mexico|HID-InDRE_FB17244_S3193|EPI_ISL_2674680|P.1|2021-06-08	Mexico	HID	HID-InDRE_FB17244_S3193	EPI_ISL_2674680	P.1	2021-06-08
Mexico|HID-IBT_IMSS_2009|EPI_ISL_2801860|P.1|2021-06-08	Mexico	HID	HID-IBT_IMSS_2009	EPI_ISL_2801860	P.1	2021-06-08
Mexico|HID-InDRE_FB17243_S3192|EPI_ISL_2674679|P.1|2021-06-08	Mexico	HID	HID-InDRE_FB17243_S3192	EPI_ISL_2674679	P.1	2021-06-08
Mexico|JAL-IBT_IMSS_1874|EPI_ISL_2801741|P.1|2021-06-08	Mexico	JAL	JAL-IBT_IMSS_1874	EPI_ISL_2801741	P.1	2021-06-08
Mexico|JAL-InDRE_FB17182_S3163|EPI_ISL_2674650|P.1|2021-06-08	Mexico	JAL	JAL-InDRE_FB17182_S3163	EPI_ISL_2674650	P.1	2021-06-08
Mexico|GUA-InDRE_FB17339_S3686|EPI_ISL_2779191|P.1|2021-06-09	Mexico	GUA	GUA-InDRE_FB17339_S3686	EPI_ISL_2779191	P.1	2021-06-09
Mexico|GUA-InDRE_FB17333_S3682|EPI_ISL_2779188|P.1|2021-06-09	Mexico	GUA	GUA-InDRE_FB17333_S3682	EPI_ISL_2779188	P.1	2021-06-09
Mexico|HID-InDRE_FB17884_S3998|EPI_ISL_2859012|P.1|2021-06-09	Mexico	HID	HID-InDRE_FB17884_S3998	EPI_ISL_2859012	P.1	2021-06-09
Mexico|JAL-IBT_IMSS_1880|EPI_ISL_2801746|P.1|2021-06-09	Mexico	JAL	JAL-IBT_IMSS_1880	EPI_ISL_2801746	P.1	2021-06-09
Mexico|GUA-InDRE_FB17348_S3978|EPI_ISL_2858992|P.1|2021-06-10	Mexico	GUA	GUA-InDRE_FB17348_S3978	EPI_ISL_2858992	P.1	2021-06-10
Mexico|SLP-InDRE_FB17612_S3652|EPI_ISL_2779159|P.1|2021-06-10	Mexico	SLP	SLP-InDRE_FB17612_S3652	EPI_ISL_2779159	P.1	2021-06-10
Mexico|CMX-CEMENAV-SEMAR-5063|EPI_ISL_2943231|P.1|2021-06-11	Mexico	CMX	CMX-CEMENAV-SEMAR-5063	EPI_ISL_2943231	P.1	2021-06-11
Mexico|GUA-InDRE_FB17347_S3977|EPI_ISL_2858991|P.1|2021-06-11	Mexico	GUA	GUA-InDRE_FB17347_S3977	EPI_ISL_2858991	P.1	2021-06-11
Mexico|GRO-LANGEBIO_IMSS_1385|EPI_ISL_2942513|P.1|2021-06-12	Mexico	GRO	GRO-LANGEBIO_IMSS_1385	EPI_ISL_2942513	P.1	2021-06-12
Mexico|GUA-IBT_IMSS_2108|EPI_ISL_2801752|P.1|2021-06-12	Mexico	GUA	GUA-IBT_IMSS_2108	EPI_ISL_2801752	P.1	2021-06-12
Mexico|JAL-InDRE_FB17404_S3981|EPI_ISL_2858995|P.1|2021-06-12	Mexico	JAL	JAL-InDRE_FB17404_S3981	EPI_ISL_2858995	P.1	2021-06-12
Mexico|JAL-InDRE_FB17770_S4295|EPI_ISL_2937757|P.1|2021-06-12	Mexico	JAL	JAL-InDRE_FB17770_S4295	EPI_ISL_2937757	P.1	2021-06-12
Mexico|JAL-InDRE_FB17787_S3668|EPI_ISL_2779175|P.1|2021-06-12	Mexico	JAL	JAL-InDRE_FB17787_S3668	EPI_ISL_2779175	P.1	2021-06-12
Mexico|MEX-INMEGEN-06-03-157|EPI_ISL_2810145|P.1|2021-06-14	Mexico	MEX	MEX-INMEGEN-06-03-157	EPI_ISL_2810145	P.1	2021-06-14
Mexico|MEX-INMEGEN-06-02-258|EPI_ISL_2692764|P.1.12|2021-06-14	Mexico	MEX	MEX-INMEGEN-06-02-258	EPI_ISL_2692764	P.1.12	2021-06-14
Mexico|SON-InDRE_FB18268_S4333|EPI_ISL_2937795|P.1|2021-06-14	Mexico	SON	SON-InDRE_FB18268_S4333	EPI_ISL_2937795	P.1	2021-06-14
Mexico|CMX-INMEGEN-06-02-1|EPI_ISL_2692539|P.1|2021-06-15	Mexico	CMX	CMX-INMEGEN-06-02-1	EPI_ISL_2692539	P.1	2021-06-15
Mexico|CMX-INMEGEN-06-03-49|EPI_ISL_2810063|P.1|2021-06-15	Mexico	CMX	CMX-INMEGEN-06-03-49	EPI_ISL_2810063	P.1	2021-06-15
Mexico|JAL-InDRE_FB18064_S4014|EPI_ISL_2859028|P.1|2021-06-15	Mexico	JAL	JAL-InDRE_FB18064_S4014	EPI_ISL_2859028	P.1	2021-06-15
Mexico|SON-InDRE_FB18271_S4335|EPI_ISL_2937797|P.1|2021-06-15	Mexico	SON	SON-InDRE_FB18271_S4335	EPI_ISL_2937797	P.1	2021-06-15
Mexico|VER-LANGEBIO_IMSS_1394|EPI_ISL_2942520|P.1|2021-06-15	Mexico	VER	VER-LANGEBIO_IMSS_1394	EPI_ISL_2942520	P.1	2021-06-15
Mexico|JAL-LANGEBIO_IMSS_1262|EPI_ISL_2942420|P.1|2021-06-16	Mexico	JAL	JAL-LANGEBIO_IMSS_1262	EPI_ISL_2942420	P.1	2021-06-16
Mexico|SIN-CIAD-MZT_HJ1835|EPI_ISL_2987700|P.1|2021-06-17	Mexico	SIN	SIN-CIAD-MZT_HJ1835	EPI_ISL_2987700	P.1	2021-06-17
Mexico|SIN-InDRE_FB18119_S4020|EPI_ISL_2859034|P.1|2021-06-17	Mexico	SIN	SIN-InDRE_FB18119_S4020	EPI_ISL_2859034	P.1	2021-06-17
Mexico|SON_LANGEBIO_IMSS_40797-NC|EPI_ISL_2970043|P.1|2021-06-17	Mexico	SON	SON_LANGEBIO_IMSS_40797-NC	EPI_ISL_2970043	P.1	2021-06-17
Mexico|JAL-InDRE_FB18313_S4339|EPI_ISL_2937801|P.1|2021-06-18	Mexico	JAL	JAL-InDRE_FB18313_S4339	EPI_ISL_2937801	P.1	2021-06-18
Mexico|NAY-InDRE_FB18132_S4312|EPI_ISL_2937774|P.1|2021-06-18	Mexico	NAY	NAY-InDRE_FB18132_S4312	EPI_ISL_2937774	P.1	2021-06-18
Mexico|PUE-LANGEBIO_IMSS_1423|EPI_ISL_2942547|P.1|2021-06-18	Mexico	PUE	PUE-LANGEBIO_IMSS_1423	EPI_ISL_2942547	P.1	2021-06-18
Mexico|MEX-INMEGEN-06-03-190|EPI_ISL_2810171|P.1|2021-06-20	Mexico	MEX	MEX-INMEGEN-06-03-190	EPI_ISL_2810171	P.1	2021-06-20
Mexico|MEX-INMEGEN-06-04-196|EPI_ISL_2894265|P.1|2021-06-20	Mexico	MEX	MEX-INMEGEN-06-04-196	EPI_ISL_2894265	P.1	2021-06-20
Mexico|JAL-LANGEBIO_IMSS_1284|EPI_ISL_2942438|P.1|2021-06-21	Mexico	JAL	JAL-LANGEBIO_IMSS_1284	EPI_ISL_2942438	P.1	2021-06-21
Mexico|MEX-INMEGEN-06-03-239|EPI_ISL_2810208|P.1.12|2021-06-22	Mexico	MEX	MEX-INMEGEN-06-03-239	EPI_ISL_2810208	P.1.12	2021-06-22
Mexico|CMX-InDRE_FD77841_S4048|EPI_ISL_2859062|P.1|2021-06-23	Mexico	CMX	CMX-InDRE_FD77841_S4048	EPI_ISL_2859062	P.1	2021-06-23
Mexico|CMX-InDRE_FD77842_S4340|EPI_ISL_2937802|P.1|2021-06-23	Mexico	CMX	CMX-InDRE_FD77842_S4340	EPI_ISL_2937802	P.1	2021-06-23
Mexico|CMX-INMEGEN-17-174|EPI_ISL_3067782|P.1|2021-06-23	Mexico	CMX	CMX-INMEGEN-17-174	EPI_ISL_3067782	P.1	2021-06-23
Mexico|HID-InDRE_FB19132_S4740|EPI_ISL_3033563|P.1|2021-06-23	Mexico	HID	HID-InDRE_FB19132_S4740	EPI_ISL_3033563	P.1	2021-06-23
Mexico|NAY-LANGEBIO_IMSS_1294|EPI_ISL_2942446|P.1|2021-06-23	Mexico	NAY	NAY-LANGEBIO_IMSS_1294	EPI_ISL_2942446	P.1	2021-06-23
Mexico|CMX-INMEGEN-06-03-71|EPI_ISL_2810080|P.1|2021-06-24	Mexico	CMX	CMX-INMEGEN-06-03-71	EPI_ISL_2810080	P.1	2021-06-24
Mexico|CMX-InDRE_FD78266_S4343|EPI_ISL_2937805|P.1|2021-06-24	Mexico	CMX	CMX-InDRE_FD78266_S4343	EPI_ISL_2937805	P.1	2021-06-24
Mexico|CMX-INMEGEN-06-03-60|EPI_ISL_2810070|P.1|2021-06-24	Mexico	CMX	CMX-INMEGEN-06-03-60	EPI_ISL_2810070	P.1	2021-06-24
Mexico|CMX-INMEGEN-06-03-91|EPI_ISL_2810096|P.1|2021-06-24	Mexico	CMX	CMX-INMEGEN-06-03-91	EPI_ISL_2810096	P.1	2021-06-24
Mexico|CMX-InDRE_FD78261_S4342|EPI_ISL_2937804|P.1|2021-06-24	Mexico	CMX	CMX-InDRE_FD78261_S4342	EPI_ISL_2937804	P.1	2021-06-24
Mexico|JAL-LANGEBIO_IMSS_1298|EPI_ISL_2942450|P.1|2021-06-24	Mexico	JAL	JAL-LANGEBIO_IMSS_1298	EPI_ISL_2942450	P.1	2021-06-24
Mexico|JAL-InDRE_FB18492_S4353|EPI_ISL_2937815|P.1|2021-06-24	Mexico	JAL	JAL-InDRE_FB18492_S4353	EPI_ISL_2937815	P.1	2021-06-24
Mexico|SIN-InDRE_FB19206_S4751|EPI_ISL_3033574|P.1|2021-06-24	Mexico	SIN	SIN-InDRE_FB19206_S4751	EPI_ISL_3033574	P.1	2021-06-24
Mexico|BCS-InDRE_FB19269_S4755|EPI_ISL_3033578|P.1|2021-06-25	Mexico	BCS	BCS-InDRE_FB19269_S4755	EPI_ISL_3033578	P.1	2021-06-25
Mexico|SON-InDRE_FB19283_S4757|EPI_ISL_3033580|P.1|2021-06-25	Mexico	SON	SON-InDRE_FB19283_S4757	EPI_ISL_3033580	P.1	2021-06-25
Mexico|NAY-LANGEBIO_IMSS_1315|EPI_ISL_2942462|P.1|2021-06-26	Mexico	NAY	NAY-LANGEBIO_IMSS_1315	EPI_ISL_2942462	P.1	2021-06-26
Mexico|CMX-INER-IBT-0367|EPI_ISL_3268374|P.1|2021-06-27	Mexico	CMX	CMX-INER-IBT-0367	EPI_ISL_3268374	P.1	2021-06-27
Mexico|MEX-LANGEBIO_IMSS_1757|EPI_ISL_2942837|P.1|2021-06-27	Mexico	MEX	MEX-LANGEBIO_IMSS_1757	EPI_ISL_2942837	P.1	2021-06-27
Mexico|CMX-INMEGEN-06-04-246|EPI_ISL_2894306|P.1.12|2021-06-28	Mexico	CMX	CMX-INMEGEN-06-04-246	EPI_ISL_2894306	P.1.12	2021-06-28
Mexico|HID-INMEGEN-06-04-369|EPI_ISL_2894410|P.1|2021-06-28	Mexico	HID	HID-INMEGEN-06-04-369	EPI_ISL_2894410	P.1	2021-06-28
Mexico|MEX-INMEGEN-16-98|EPI_ISL_2978444|P.1|2021-06-28	Mexico	MEX	MEX-INMEGEN-16-98	EPI_ISL_2978444	P.1	2021-06-28
Mexico|MEX-INMEGEN-16-96|EPI_ISL_2978442|P.1|2021-06-28	Mexico	MEX	MEX-INMEGEN-16-96	EPI_ISL_2978442	P.1	2021-06-28
Mexico|SO-ALSR-105308|EPI_ISL_3373982|P.1|2021-06-28	Mexico	SO-USA	SO-ALSR-105308	EPI_ISL_3373982	P.1	2021-06-28
Mexico|SON-InDRE_FB20092_S5097|EPI_ISL_3265592|P.1|2021-06-28	Mexico	SON	SON-InDRE_FB20092_S5097	EPI_ISL_3265592	P.1	2021-06-28
Mexico|SON-InDRE_FB20093_S5098|EPI_ISL_3265593|P.1|2021-06-28	Mexico	SON	SON-InDRE_FB20093_S5098	EPI_ISL_3265593	P.1	2021-06-28
Mexico|HID-InDRE_FB19147_S4747|EPI_ISL_3033570|P.1|2021-06-29	Mexico	HID	HID-InDRE_FB19147_S4747	EPI_ISL_3033570	P.1	2021-06-29
Mexico|MEX-INMEGEN-16-157|EPI_ISL_2978499|P.1|2021-06-29	Mexico	MEX	MEX-INMEGEN-16-157	EPI_ISL_2978499	P.1	2021-06-29
Mexico|MEX-INMEGEN-16-38|EPI_ISL_2978391|P.1|2021-06-29	Mexico	MEX	MEX-INMEGEN-16-38	EPI_ISL_2978391	P.1	2021-06-29
Mexico|MEX-INMEGEN-16-141|EPI_ISL_2978484|P.1|2021-06-29	Mexico	MEX	MEX-INMEGEN-16-141	EPI_ISL_2978484	P.1	2021-06-29
Mexico|MEX-INMEGEN-16-147|EPI_ISL_2978489|P.1|2021-06-29	Mexico	MEX	MEX-INMEGEN-16-147	EPI_ISL_2978489	P.1	2021-06-29
Mexico|SIN-SEARCH-108281|EPI_ISL_4411285|P.1|2021-06-29	Mexico	SIN	SIN-SEARCH-108281	EPI_ISL_4411285	P.1	2021-06-29
Mexico|SO-ALSR-105382|EPI_ISL_3374039|P.1|2021-06-29	Mexico	SO-USA	SO-ALSR-105382	EPI_ISL_3374039	P.1	2021-06-29
Mexico|SON-InDRE_FB20094_S5099|EPI_ISL_3265594|P.1|2021-06-29	Mexico	SON	SON-InDRE_FB20094_S5099	EPI_ISL_3265594	P.1	2021-06-29
Mexico|CMX-LANGEBIO_IMSS_1820|EPI_ISL_2942893|P.1|2021-06-30	Mexico	CMX	CMX-LANGEBIO_IMSS_1820	EPI_ISL_2942893	P.1	2021-06-30
Mexico|AGU-InDRE_FB19718_S5093|EPI_ISL_3265588|P.1|2021-07-01	Mexico	AGU	AGU-InDRE_FB19718_S5093	EPI_ISL_3265588	P.1	2021-07-01
Mexico|JAL-LANGEBIO_IMSS_1629|EPI_ISL_2942732|P.1|2021-07-01	Mexico	JAL	JAL-LANGEBIO_IMSS_1629	EPI_ISL_2942732	P.1	2021-07-01
Mexico|MIC-InDRE_FB19326_S4770|EPI_ISL_3033592|P.1|2021-07-01	Mexico	MIC	MIC-InDRE_FB19326_S4770	EPI_ISL_3033592	P.1	2021-07-01
Mexico|NAY-InDRE_FB21008_S5114|EPI_ISL_3278289|P.1|2021-07-01	Mexico	NAY	NAY-InDRE_FB21008_S5114	EPI_ISL_3278289	P.1	2021-07-01
Mexico|SON-H-3336|EPI_ISL_2894606|P.1|2021-07-01	Mexico	SON	SON-H-3336	EPI_ISL_2894606	P.1	2021-07-01
Mexico|CMX-INMEGEN-17-18|EPI_ISL_3067926|P.1|2021-07-02	Mexico	CMX	CMX-INMEGEN-17-18	EPI_ISL_3067926	P.1	2021-07-02
Mexico|MEX-INMEGEN-17-90|EPI_ISL_3067677|P.1|2021-07-02	Mexico	MEX	MEX-INMEGEN-17-90	EPI_ISL_3067677	P.1	2021-07-02
Mexico|SO-ALSR-105303|EPI_ISL_3373979|P.1|2021-07-03	Mexico	SO-USA	SO-ALSR-105303	EPI_ISL_3373979	P.1	2021-07-03
Mexico|MEX-INMEGEN-17-83|EPI_ISL_3067661|P.1|2021-07-04	Mexico	MEX	MEX-INMEGEN-17-83	EPI_ISL_3067661	P.1	2021-07-04
Mexico|MEX-INMEGEN-17-39|EPI_ISL_3067849|P.1|2021-07-04	Mexico	MEX	MEX-INMEGEN-17-39	EPI_ISL_3067849	P.1	2021-07-04
Mexico|MEX-INMEGEN-16-247|EPI_ISL_2978563|P.1|2021-07-04	Mexico	MEX	MEX-INMEGEN-16-247	EPI_ISL_2978563	P.1	2021-07-04
Mexico|MEX-INMEGEN-16-233|EPI_ISL_2978552|P.1|2021-07-04	Mexico	MEX	MEX-INMEGEN-16-233	EPI_ISL_2978552	P.1	2021-07-04
Mexico|SO-ALSR-105379|EPI_ISL_3374036|P.1|2021-07-04	Mexico	SO-USA	SO-ALSR-105379	EPI_ISL_3374036	P.1	2021-07-04
Mexico|SIN-INMEGEN-19-83|EPI_ISL_3277614|P.1|2021-07-05	Mexico	SIN	SIN-INMEGEN-19-83	EPI_ISL_3277614	P.1	2021-07-05
Mexico|MEX-INER_IMSS_1601|EPI_ISL_3155611|P.1|2021-07-06	Mexico	MEX	MEX-INER_IMSS_1601	EPI_ISL_3155611	P.1	2021-07-06
Mexico|SIN-INMEGEN-20-1|EPI_ISL_3503562|P.1|2021-07-06	Mexico	SIN	SIN-INMEGEN-20-1	EPI_ISL_3503562	P.1	2021-07-06
Mexico|SO-ALSR-105359|EPI_ISL_3374016|P.1|2021-07-06	Mexico	SO-USA	SO-ALSR-105359	EPI_ISL_3374016	P.1	2021-07-06
Mexico|SO-ALSR-105373|EPI_ISL_3374030|P.1|2021-07-06	Mexico	SO-USA	SO-ALSR-105373	EPI_ISL_3374030	P.1	2021-07-06
Mexico|SO-ALSR-105366|EPI_ISL_3374023|P.1|2021-07-06	Mexico	SO-USA	SO-ALSR-105366	EPI_ISL_3374023	P.1	2021-07-06
Mexico|HID-INER_IMSS_1613|EPI_ISL_3155623|P.1|2021-07-07	Mexico	HID	HID-INER_IMSS_1613	EPI_ISL_3155623	P.1	2021-07-07
Mexico|JAL-INER_IMSS_1461|EPI_ISL_3155471|P.1|2021-07-07	Mexico	JAL	JAL-INER_IMSS_1461	EPI_ISL_3155471	P.1	2021-07-07
Mexico|JAL-InDRE_FB20708_S5331|EPI_ISL_3459947|P.1|2021-07-07	Mexico	JAL	JAL-InDRE_FB20708_S5331	EPI_ISL_3459947	P.1	2021-07-07
Mexico|NAY-CIAD-4733-0707|EPI_ISL_3149318|P.1|2021-07-07	Mexico	NAY	NAY-CIAD-4733-0707	EPI_ISL_3149318	P.1	2021-07-07
Mexico|JAL-INER_IMSS_1462|EPI_ISL_3155472|P.1|2021-07-08	Mexico	JAL	JAL-INER_IMSS_1462	EPI_ISL_3155472	P.1	2021-07-08
Mexico|SON-InDRE_FB21629_S5199|EPI_ISL_3459940|P.1|2021-07-08	Mexico	SON	SON-InDRE_FB21629_S5199	EPI_ISL_3459940	P.1	2021-07-08
Mexico|AGU-InDRE_FB20899_S5106|EPI_ISL_3265600|P.1|2021-07-09	Mexico	AGU	AGU-InDRE_FB20899_S5106	EPI_ISL_3265600	P.1	2021-07-09
Mexico|JAL-INER_IMSS_1484|EPI_ISL_3155494|P.1|2021-07-09	Mexico	JAL	JAL-INER_IMSS_1484	EPI_ISL_3155494	P.1	2021-07-09
Mexico|NAY-CIAD-4750-0709|EPI_ISL_3149321|P.1|2021-07-09	Mexico	NAY	NAY-CIAD-4750-0709	EPI_ISL_3149321	P.1	2021-07-09
Mexico|NAY-CIAD-4746-0709|EPI_ISL_3149320|P.1|2021-07-09	Mexico	NAY	NAY-CIAD-4746-0709	EPI_ISL_3149320	P.1	2021-07-09
USA|OR-CDC-ASC210113047|EPI_ISL_3218549|P.1|2021-07-10	USA	OR-USA	OR-CDC-ASC210113047	EPI_ISL_3218549	P.1	2021-07-10
Mexico|QUE-InDRE_FB21758_S5226|EPI_ISL_3459942|P.1|2021-07-12	Mexico	QUE	QUE-InDRE_FB21758_S5226	EPI_ISL_3459942	P.1	2021-07-12
Mexico|SO-ALSR-106684|EPI_ISL_3912477|P.1|2021-07-12	Mexico	SO-USA	SO-ALSR-106684	EPI_ISL_3912477	P.1	2021-07-12
Mexico|SON-InDRE_FB23119_S5317|EPI_ISL_3459945|P.1|2021-07-12	Mexico	SON	SON-InDRE_FB23119_S5317	EPI_ISL_3459945	P.1	2021-07-12
Mexico|SIN-ALSR-106725|EPI_ISL_3912496|P.1|2021-07-13	Mexico	SIN	SIN-ALSR-106725	EPI_ISL_3912496	P.1	2021-07-13
Mexico|SIN-ALSR-106753|EPI_ISL_3912518|P.1|2021-07-13	Mexico	SIN	SIN-ALSR-106753	EPI_ISL_3912518	P.1	2021-07-13
Mexico|COL-InDRE_FB23249_S5539|EPI_ISL_3459908|P.1|2021-07-14	Mexico	COL	COL-InDRE_FB23249_S5539	EPI_ISL_3459908	P.1	2021-07-14
Mexico|HID-INMEGEN-18-34|EPI_ISL_3160666|P.1|2021-07-15	Mexico	HID	HID-INMEGEN-18-34	EPI_ISL_3160666	P.1	2021-07-15
Mexico|MEX-INMEGEN-18-3|EPI_ISL_3160636|P.1|2021-07-15	Mexico	MEX	MEX-INMEGEN-18-3	EPI_ISL_3160636	P.1	2021-07-15
Mexico|NAY-CIAD-4808-0715|EPI_ISL_3149314|P.1|2021-07-15	Mexico	NAY	NAY-CIAD-4808-0715	EPI_ISL_3149314	P.1	2021-07-15
Mexico|SIN_IBT_IMSS_2240|EPI_ISL_3347554|P.1|2021-07-18	Mexico	SIN	SIN_IBT_IMSS_2240	EPI_ISL_3347554	P.1	2021-07-18
Mexico|SON_InDRE_FB28197_S6169|EPI_ISL_3923754|P.1|2021-07-26	Mexico	SON	SON_InDRE_FB28197_S6169	EPI_ISL_3923754	P.1	2021-07-26
Mexico|CMX_LANGEBIO_IMSS_2069|EPI_ISL_3805733|P.1|2021-08-03	Mexico	CMX	CMX_LANGEBIO_IMSS_2069	EPI_ISL_3805733	P.1	2021-08-03
Mexico|TAB_InDRE_FB28618_S5988|EPI_ISL_3923744|P.1|2021-08-04	Mexico	TAB	TAB_InDRE_FB28618_S5988	EPI_ISL_3923744	P.1	2021-08-04
Mexico|SO-SEARCH-109830|EPI_ISL_5237625|P.1|2021-08-18	Mexico	SO-USA	SO-SEARCH-109830	EPI_ISL_5237625	P.1	2021-08-18
Mexico|SON-CABANA-MX-UGA-IMSS_ITV_UBA_UCR_UdA_UPC-3603|EPI_ISL_7813204|P.1|2021-08-31	Mexico	SON	SON-CABANA-MX-UGA-IMSS_ITV_UBA_UCR_UdA_UPC-3603	EPI_ISL_7813204	P.1	2021-08-31
Mexico|SON_InDRE_FB45364_S8353|EPI_ISL_5686988|P.1|2021-10-01	Mexico	SON	SON_InDRE_FB45364_S8353	EPI_ISL_5686988	P.1	2021-10-01

## Sheet: C1_P1_17
Name	Country	State	ID	GSAID	Sublineage	Date
Mexico|YUC_IBT_IMSS_1348|EPI_ISL_2391578|P.1.17|2021-04-01	Mexico	YUC	YUC_IBT_IMSS_1348	EPI_ISL_2391578	P.1.17	2021-04-01
Mexico|CAM_LANGEBIO_IMSS_0645|EPI_ISL_2402062|P.1.17|2021-04-26	Mexico	CAM	CAM_LANGEBIO_IMSS_0645	EPI_ISL_2402062	P.1.17	2021-04-26
USA|WA-UW-21042814058|EPI_ISL_2233184|P.1.17|2021-04-28	USA	WA-USAU	WA-UW-21042814058	EPI_ISL_2233184	P.1.17	2021-04-28
USA|CA-CDC-QDX24476273|EPI_ISL_2187241|P.1.17|2021-04-30	USA	CA-USAC	CA-CDC-QDX24476273	EPI_ISL_2187241	P.1.17	2021-04-30
Mexico|NLE_INER_IMSS_1040|EPI_ISL_2490362|P.1.17|2021-05-06	Mexico	NLE	NLE_INER_IMSS_1040	EPI_ISL_2490362	P.1.17	2021-05-06
Mexico|ROO_INER_IMSS_1136|EPI_ISL_2490374|P.1.17|2021-05-06	Mexico	ROO	ROO_INER_IMSS_1136	EPI_ISL_2490374	P.1.17	2021-05-06
Mexico|ROO_INER_IMSS_1137|EPI_ISL_2490375|P.1.17|2021-05-06	Mexico	ROO	ROO_INER_IMSS_1137	EPI_ISL_2490375	P.1.17	2021-05-06
Mexico|CMX-INER-IBT-0219|EPI_ISL_2490587|P.1.17|2021-05-07	Mexico	CAM	CMX-INER-IBT-0219	EPI_ISL_2490587	P.1.17	2021-05-07
Belize|CML-86|EPI_ISL_4296390|P.1.17|2021-05-07	Belize	CML-USA	CML-86	EPI_ISL_4296390	P.1.17	2021-05-07
Mexico|ROO_INER_IMSS_1148|EPI_ISL_2490377|P.1.17|2021-05-08	Mexico	ROO	ROO_INER_IMSS_1148	EPI_ISL_2490377	P.1.17	2021-05-08
USA|WA-CDC-FG-034301|EPI_ISL_2269562|P.1.17|2021-05-08	USA	WA-USAC	WA-CDC-FG-034301	EPI_ISL_2269562	P.1.17	2021-05-08
Mexico|CMX-INMEGEN-05-02-69|EPI_ISL_2230826|P.1.17|2021-05-10	Mexico	CAM	CMX-INMEGEN-05-02-69	EPI_ISL_2230826	P.1.17	2021-05-10
USA|WA-S8552|EPI_ISL_2714967|P.1.17|2021-05-10	USA	WA-USAS	WA-S8552	EPI_ISL_2714967	P.1.17	2021-05-10
USA|WA-S8084|EPI_ISL_2536620|P.1.17|2021-05-10	USA	WA-USAS	WA-S8084	EPI_ISL_2536620	P.1.17	2021-05-10
USA|WA-S8034|EPI_ISL_2536572|P.1.17|2021-05-10	USA	WA-USAS	WA-S8034	EPI_ISL_2536572	P.1.17	2021-05-10
Mexico|CMX-INMEGEN-INDRE-05-03-216|EPI_ISL_2319335|P.1.17|2021-05-11	Mexico	CAM	CMX-INMEGEN-INDRE-05-03-216	EPI_ISL_2319335	P.1.17	2021-05-11
Mexico|MEX-INMEGEN-05-04-10|EPI_ISL_2349889|P.1.17|2021-05-11	Mexico	MEX	MEX-INMEGEN-05-04-10	EPI_ISL_2349889	P.1.17	2021-05-11
USA|WA-S8044|EPI_ISL_2536581|P.1.17|2021-05-11	USA	WA-USAS	WA-S8044	EPI_ISL_2536581	P.1.17	2021-05-11
USA|WA-S8364|EPI_ISL_2692396|P.1.17|2021-05-12	USA	WA-USAS	WA-S8364	EPI_ISL_2692396	P.1.17	2021-05-12
USA|WA-S8372|EPI_ISL_2692404|P.1.17|2021-05-12	USA	WA-USAS	WA-S8372	EPI_ISL_2692404	P.1.17	2021-05-12
Mexico|ROO-InDRE_FB18298_S4039|EPI_ISL_2859053|P.1.17|2021-05-13	Mexico	ROO	ROO-InDRE_FB18298_S4039	EPI_ISL_2859053	P.1.17	2021-05-13
USA|GA-CDC-ASC210063855|EPI_ISL_2280763|P.1.17|2021-05-14	USA	GA-USAC	GA-CDC-ASC210063855	EPI_ISL_2280763	P.1.17	2021-05-14
Mexico|CAM-LANGEBIO_IMSS_0897|EPI_ISL_2671495|P.1.17|2021-05-17	Mexico	CAM	CAM-LANGEBIO_IMSS_0897	EPI_ISL_2671495	P.1.17	2021-05-17
Mexico|CMX-InDRE_FD69038_S2548|EPI_ISL_2479882|P.1.17|2021-05-17	Mexico	CAM	CMX-InDRE_FD69038_S2548	EPI_ISL_2479882	P.1.17	2021-05-17
Mexico|ROO-InDRE_FB16363_S2611|EPI_ISL_2479914|P.1.17|2021-05-17	Mexico	ROO	ROO-InDRE_FB16363_S2611	EPI_ISL_2479914	P.1.17	2021-05-17
Mexico|ROO-LANGEBIO_IMSS_0902|EPI_ISL_2671656|P.1.17|2021-05-17	Mexico	ROO	ROO-LANGEBIO_IMSS_0902	EPI_ISL_2671656	P.1.17	2021-05-17
Mexico|ROO-LANGEBIO_IMSS_0905|EPI_ISL_2671658|P.1.17|2021-05-17	Mexico	ROO	ROO-LANGEBIO_IMSS_0905	EPI_ISL_2671658	P.1.17	2021-05-17
Mexico|ROO-LANGEBIO_IMSS_0891|EPI_ISL_2671654|P.1.17|2021-05-17	Mexico	ROO	ROO-LANGEBIO_IMSS_0891	EPI_ISL_2671654	P.1.17	2021-05-17
Mexico|ROO-LANGEBIO_IMSS_0904|EPI_ISL_2671657|P.1.17|2021-05-17	Mexico	ROO	ROO-LANGEBIO_IMSS_0904	EPI_ISL_2671657	P.1.17	2021-05-17
Mexico|YUC-InDRE_FB15983_S2560|EPI_ISL_2479887|P.1.17|2021-05-17	Mexico	YUC	YUC-InDRE_FB15983_S2560	EPI_ISL_2479887	P.1.17	2021-05-17
Mexico|YUC-InDRE_FB16580_S2837|EPI_ISL_2545739|P.1.17|2021-05-17	Mexico	YUC	YUC-InDRE_FB16580_S2837	EPI_ISL_2545739	P.1.17	2021-05-17
Mexico|CMX-INER-INMEGEN-00222|EPI_ISL_2646123|P.1.17|2021-05-18	Mexico	CAM	CMX-INER-INMEGEN-00222	EPI_ISL_2646123	P.1.17	2021-05-18
Mexico|CMX-LANGEBIO_IMSS_1072|EPI_ISL_2671533|P.1.17|2021-05-18	Mexico	CAM	CMX-LANGEBIO_IMSS_1072	EPI_ISL_2671533	P.1.17	2021-05-18
Mexico|ROO-LANGEBIO_IMSS_0921|EPI_ISL_2671669|P.1.17|2021-05-18	Mexico	ROO	ROO-LANGEBIO_IMSS_0921	EPI_ISL_2671669	P.1.17	2021-05-18
Mexico|ROO-LANGEBIO_IMSS_0914|EPI_ISL_2671663|P.1.17|2021-05-18	Mexico	ROO	ROO-LANGEBIO_IMSS_0914	EPI_ISL_2671663	P.1.17	2021-05-18
Mexico|ROO-LANGEBIO_IMSS_0920|EPI_ISL_2671668|P.1.17|2021-05-18	Mexico	ROO	ROO-LANGEBIO_IMSS_0920	EPI_ISL_2671668	P.1.17	2021-05-18
Mexico|ROO-LANGEBIO_IMSS_0912|EPI_ISL_2671661|P.1.17|2021-05-18	Mexico	ROO	ROO-LANGEBIO_IMSS_0912	EPI_ISL_2671661	P.1.17	2021-05-18
Mexico|VER-LANGEBIO_IMSS_1107|EPI_ISL_2671741|P.1.17|2021-05-18	Mexico	VER	VER-LANGEBIO_IMSS_1107	EPI_ISL_2671741	P.1.17	2021-05-18
Mexico|ROO-LANGEBIO_IMSS_1161|EPI_ISL_2671783|P.1.17|2021-05-19	Mexico	ROO	ROO-LANGEBIO_IMSS_1161	EPI_ISL_2671783	P.1.17	2021-05-19
Mexico|COA-InDRE_FB16338_S2820|EPI_ISL_2545728|P.1.17|2021-05-20	Mexico	COA	COA-InDRE_FB16338_S2820	EPI_ISL_2545728	P.1.17	2021-05-20
Mexico|ROO-LANGEBIO_IMSS_0933|EPI_ISL_2671677|P.1.17|2021-05-20	Mexico	ROO	ROO-LANGEBIO_IMSS_0933	EPI_ISL_2671677	P.1.17	2021-05-20
Mexico|ROO-LANGEBIO_IMSS_0932|EPI_ISL_2671676|P.1.17|2021-05-20	Mexico	ROO	ROO-LANGEBIO_IMSS_0932	EPI_ISL_2671676	P.1.17	2021-05-20
Mexico|ROO-InDRE_FB18297_S4038|EPI_ISL_2859052|P.1.17|2021-05-20	Mexico	ROO	ROO-InDRE_FB18297_S4038	EPI_ISL_2859052	P.1.17	2021-05-20
Mexico|YUC-InDRE_FB16620_S2858|EPI_ISL_2545760|P.1.17|2021-05-20	Mexico	YUC	YUC-InDRE_FB16620_S2858	EPI_ISL_2545760	P.1.17	2021-05-20
Mexico|YUC-InDRE_FB16619_S2857|EPI_ISL_2545759|P.1.17|2021-05-20	Mexico	YUC	YUC-InDRE_FB16619_S2857	EPI_ISL_2545759	P.1.17	2021-05-20
Mexico|CAM-InDRE_FB16261_S2819|EPI_ISL_2545727|P.1.17|2021-05-21	Mexico	CAM	CAM-InDRE_FB16261_S2819	EPI_ISL_2545727	P.1.17	2021-05-21
USA|NJ-CDC-ASC210066091|EPI_ISL_2370541|P.1.17|2021-05-21	USA	NJ-USAC	NJ-CDC-ASC210066091	EPI_ISL_2370541	P.1.17	2021-05-21
Mexico|ROO-LANGEBIO_IMSS_1160|EPI_ISL_2671782|P.1.17|2021-05-21	Mexico	ROO	ROO-LANGEBIO_IMSS_1160	EPI_ISL_2671782	P.1.17	2021-05-21
Mexico|ROO-LANGEBIO_IMSS_0938|EPI_ISL_2671681|P.1.17|2021-05-21	Mexico	ROO	ROO-LANGEBIO_IMSS_0938	EPI_ISL_2671681	P.1.17	2021-05-21
Mexico|ROO-LANGEBIO_IMSS_0943|EPI_ISL_2671683|P.1.17|2021-05-21	Mexico	ROO	ROO-LANGEBIO_IMSS_0943	EPI_ISL_2671683	P.1.17	2021-05-21
Mexico|ROO-LANGEBIO_IMSS_0931|EPI_ISL_2671675|P.1.17|2021-05-21	Mexico	ROO	ROO-LANGEBIO_IMSS_0931	EPI_ISL_2671675	P.1.17	2021-05-21
Mexico|YUC-InDRE_FB16644_S2874|EPI_ISL_2545776|P.1.17|2021-05-21	Mexico	YUC	YUC-InDRE_FB16644_S2874	EPI_ISL_2545776	P.1.17	2021-05-21
Mexico|YUC-InDRE_FB16645_S2875|EPI_ISL_2545777|P.1.17|2021-05-21	Mexico	YUC	YUC-InDRE_FB16645_S2875	EPI_ISL_2545777	P.1.17	2021-05-21
Mexico|ROO-LANGEBIO_IMSS_0951|EPI_ISL_2671684|P.1.17|2021-05-22	Mexico	ROO	ROO-LANGEBIO_IMSS_0951	EPI_ISL_2671684	P.1.17	2021-05-22
Mexico|ROO-LANGEBIO_IMSS_0963|EPI_ISL_2671693|P.1.17|2021-05-22	Mexico	ROO	ROO-LANGEBIO_IMSS_0963	EPI_ISL_2671693	P.1.17	2021-05-22
Mexico|TAB-LANGEBIO_IMSS_0945|EPI_ISL_2671710|P.1.17|2021-05-22	Mexico	TAB	TAB-LANGEBIO_IMSS_0945	EPI_ISL_2671710	P.1.17	2021-05-22
Mexico|YUC-InDRE_FB16641_S2872|EPI_ISL_2545774|P.1.17|2021-05-22	Mexico	YUC	YUC-InDRE_FB16641_S2872	EPI_ISL_2545774	P.1.17	2021-05-22
Mexico|ROO-LANGEBIO_IMSS_0953|EPI_ISL_2671686|P.1.17|2021-05-23	Mexico	ROO	ROO-LANGEBIO_IMSS_0953	EPI_ISL_2671686	P.1.17	2021-05-23
Mexico|YUC-InDRE_FB16664_S2887|EPI_ISL_2545789|P.1.17|2021-05-23	Mexico	YUC	YUC-InDRE_FB16664_S2887	EPI_ISL_2545789	P.1.17	2021-05-23
Mexico|CAM-LANGEBIO_IMSS_0955|EPI_ISL_2671502|P.1.17|2021-05-24	Mexico	CAM	CAM-LANGEBIO_IMSS_0955	EPI_ISL_2671502	P.1.17	2021-05-24
Mexico|CMX_IBT_IMSS_1539|EPI_ISL_2681154|P.1.17|2021-05-24	Mexico	CMX	CMX_IBT_IMSS_1539	EPI_ISL_2681154	P.1.17	2021-05-24
USA|MD-IGS-52114412882A|EPI_ISL_3012170|P.1.17|2021-05-24	USA	MD-USAI	MD-IGS-52114412882A	EPI_ISL_3012170	P.1.17	2021-05-24
Mexico|ROO_LANGEBIO_IMSS_09616-NC|EPI_ISL_2970029|P.1.17|2021-05-24	Mexico	ROO	ROO_LANGEBIO_IMSS_09616-NC	EPI_ISL_2970029	P.1.17	2021-05-24
Mexico|ROO-InDRE_FB16799_S2911|EPI_ISL_2545811|P.1.17|2021-05-24	Mexico	ROO	ROO-InDRE_FB16799_S2911	EPI_ISL_2545811	P.1.17	2021-05-24
Mexico|ROO-LANGEBIO_IMSS_0952|EPI_ISL_2671685|P.1.17|2021-05-24	Mexico	ROO	ROO-LANGEBIO_IMSS_0952	EPI_ISL_2671685	P.1.17	2021-05-24
Mexico|ROO-LANGEBIO_IMSS_1163|EPI_ISL_2671785|P.1.17|2021-05-24	Mexico	ROO	ROO-LANGEBIO_IMSS_1163	EPI_ISL_2671785	P.1.17	2021-05-24
Mexico|ROO-LANGEBIO_IMSS_0958|EPI_ISL_2671688|P.1.17|2021-05-24	Mexico	ROO	ROO-LANGEBIO_IMSS_0958	EPI_ISL_2671688	P.1.17	2021-05-24
USA|WA-CDC-UW21052427536|EPI_ISL_2497397|P.1.17|2021-05-24	USA	WA-USAC	WA-CDC-UW21052427536	EPI_ISL_2497397	P.1.17	2021-05-24
Mexico|YUC-InDRE_FB16656_S2883|EPI_ISL_2545785|P.1.17|2021-05-24	Mexico	YUC	YUC-InDRE_FB16656_S2883	EPI_ISL_2545785	P.1.17	2021-05-24
Mexico|YUC-LANGEBIO_IMSS_0944|EPI_ISL_2671751|P.1.17|2021-05-24	Mexico	YUC	YUC-LANGEBIO_IMSS_0944	EPI_ISL_2671751	P.1.17	2021-05-24
Mexico|CAM-LANGEBIO_IMSS_0970|EPI_ISL_2671504|P.1.17|2021-05-25	Mexico	CAM	CAM-LANGEBIO_IMSS_0970	EPI_ISL_2671504	P.1.17	2021-05-25
Mexico|CAM-LANGEBIO_IMSS_0969|EPI_ISL_2671503|P.1.17|2021-05-25	Mexico	CAM	CAM-LANGEBIO_IMSS_0969	EPI_ISL_2671503	P.1.17	2021-05-25
Mexico|ROO-LANGEBIO_IMSS_0966|EPI_ISL_2671694|P.1.17|2021-05-25	Mexico	ROO	ROO-LANGEBIO_IMSS_0966	EPI_ISL_2671694	P.1.17	2021-05-25
Mexico|ROO-LANGEBIO_IMSS_0962|EPI_ISL_2671692|P.1.17|2021-05-25	Mexico	ROO	ROO-LANGEBIO_IMSS_0962	EPI_ISL_2671692	P.1.17	2021-05-25
Mexico|ROO-InDRE_FB16794_S2910|EPI_ISL_2545810|P.1.17|2021-05-25	Mexico	ROO	ROO-InDRE_FB16794_S2910	EPI_ISL_2545810	P.1.17	2021-05-25
Mexico|ROO-LANGEBIO_IMSS_0957|EPI_ISL_2671687|P.1.17|2021-05-25	Mexico	ROO	ROO-LANGEBIO_IMSS_0957	EPI_ISL_2671687	P.1.17	2021-05-25
USA|WA-PHL-000887|EPI_ISL_2557055|P.1.17|2021-05-25	USA	WA-USAP	WA-PHL-000887	EPI_ISL_2557055	P.1.17	2021-05-25
Mexico|YUC-InDRE_FB16676_S2892|EPI_ISL_2545794|P.1.17|2021-05-25	Mexico	YUC	YUC-InDRE_FB16676_S2892	EPI_ISL_2545794	P.1.17	2021-05-25
Mexico|CMX_IBT_IMSS_1552|EPI_ISL_2681166|P.1.17|2021-05-26	Mexico	CMX	CMX_IBT_IMSS_1552	EPI_ISL_2681166	P.1.17	2021-05-26
Mexico|MEX-INMEGEN-06-02-313|EPI_ISL_2692803|P.1.17|2021-05-26	Mexico	MEX	MEX-INMEGEN-06-02-313	EPI_ISL_2692803	P.1.17	2021-05-26
Mexico|ROO-LANGEBIO_IMSS_0971|EPI_ISL_2671695|P.1.17|2021-05-26	Mexico	ROO	ROO-LANGEBIO_IMSS_0971	EPI_ISL_2671695	P.1.17	2021-05-26
Mexico|YUC-LANGEBIO_IMSS_0956|EPI_ISL_2671753|P.1.17|2021-05-26	Mexico	YUC	YUC-LANGEBIO_IMSS_0956	EPI_ISL_2671753	P.1.17	2021-05-26
USA|MD-IGS-52114609729A|EPI_ISL_3012175|P.1.17|2021-05-27	USA	MD-USAI	MD-IGS-52114609729A	EPI_ISL_3012175	P.1.17	2021-05-27
Mexico|MEX_IBT_IMSS_1611|EPI_ISL_2681245|P.1.17|2021-05-28	Mexico	MEX	MEX_IBT_IMSS_1611	EPI_ISL_2681245	P.1.17	2021-05-28
Mexico|MEX-INMEGEN-05-06-203|EPI_ISL_2603692|P.1.17|2021-05-28	Mexico	MEX	MEX-INMEGEN-05-06-203	EPI_ISL_2603692	P.1.17	2021-05-28
USA|NJ-CDC-LC0070406|EPI_ISL_2611459|P.1.17|2021-05-28	USA	NJ-USAC	NJ-CDC-LC0070406	EPI_ISL_2611459	P.1.17	2021-05-28
USA|NY-CDC-FG-037232|EPI_ISL_2686477|P.1.17|2021-05-28	USA	NY-USAC	NY-CDC-FG-037232	EPI_ISL_2686477	P.1.17	2021-05-28
Mexico|ROO_IBT_IMSS_1712|EPI_ISL_2681084|P.1.17|2021-05-28	Mexico	ROO	ROO_IBT_IMSS_1712	EPI_ISL_2681084	P.1.17	2021-05-28
Mexico|ROO_IBT_IMSS_1722|EPI_ISL_2681304|P.1.17|2021-05-28	Mexico	ROO	ROO_IBT_IMSS_1722	EPI_ISL_2681304	P.1.17	2021-05-28
USA|WA-UW-21052880329|EPI_ISL_2545082|P.1.17|2021-05-28	USA	WA-USAU	WA-UW-21052880329	EPI_ISL_2545082	P.1.17	2021-05-28
USA|WA-UW-21052812116|EPI_ISL_2545139|P.1.17|2021-05-28	USA	WA-USAU	WA-UW-21052812116	EPI_ISL_2545139	P.1.17	2021-05-28
Mexico|YUC_IBT_IMSS_1417|EPI_ISL_2681292|P.1.17|2021-05-28	Mexico	YUC	YUC_IBT_IMSS_1417	EPI_ISL_2681292	P.1.17	2021-05-28
Mexico|YUC-InDRE_FB16554_S3201|EPI_ISL_2674688|P.1.17|2021-05-28	Mexico	YUC	YUC-InDRE_FB16554_S3201	EPI_ISL_2674688	P.1.17	2021-05-28
Mexico|ROO_IBT_IMSS_1710|EPI_ISL_2681353|P.1.17|2021-05-29	Mexico	ROO	ROO_IBT_IMSS_1710	EPI_ISL_2681353	P.1.17	2021-05-29
USA|CO-CDC-MMB09005225|EPI_ISL_2875215|P.1.17|2021-05-30	USA	CO-USAC	CO-CDC-MMB09005225	EPI_ISL_2875215	P.1.17	2021-05-30
Mexico|MEX-INMEGEN-06-01-2|EPI_ISL_2616811|P.1.17|2021-05-30	Mexico	MEX	MEX-INMEGEN-06-01-2	EPI_ISL_2616811	P.1.17	2021-05-30
Mexico|ROO_IBT_IMSS_1619|EPI_ISL_2681083|P.1.17|2021-05-30	Mexico	ROO	ROO_IBT_IMSS_1619	EPI_ISL_2681083	P.1.17	2021-05-30
Mexico|SLP_IBT_IMSS_10564-NC|EPI_ISL_2681376|P.1.17|2021-05-30	Mexico	SLP	SLP_IBT_IMSS_10564-NC	EPI_ISL_2681376	P.1.17	2021-05-30
Mexico|ROO_IBT_IMSS_1725|EPI_ISL_2681100|P.1.17|2021-05-31	Mexico	ROO	ROO_IBT_IMSS_1725	EPI_ISL_2681100	P.1.17	2021-05-31
Mexico|ROO_IBT_IMSS_1630|EPI_ISL_2681261|P.1.17|2021-05-31	Mexico	ROO	ROO_IBT_IMSS_1630	EPI_ISL_2681261	P.1.17	2021-05-31
Mexico|ROO_IBT_IMSS_1717|EPI_ISL_2681116|P.1.17|2021-05-31	Mexico	ROO	ROO_IBT_IMSS_1717	EPI_ISL_2681116	P.1.17	2021-05-31
Mexico|ROO-INMEGEN-05-06-197|EPI_ISL_2603686|P.1.17|2021-05-31	Mexico	ROO	ROO-INMEGEN-05-06-197	EPI_ISL_2603686	P.1.17	2021-05-31
Mexico|ROO-INMEGEN-05-06-190|EPI_ISL_2603679|P.1.17|2021-05-31	Mexico	ROO	ROO-INMEGEN-05-06-190	EPI_ISL_2603679	P.1.17	2021-05-31
Mexico|ROO-InDRE_FB17194_S3168|EPI_ISL_2674655|P.1.17|2021-05-31	Mexico	ROO	ROO-InDRE_FB17194_S3168	EPI_ISL_2674655	P.1.17	2021-05-31
Mexico|YUC_IBT_IMSS_1467|EPI_ISL_2681082|P.1.17|2021-05-31	Mexico	YUC	YUC_IBT_IMSS_1467	EPI_ISL_2681082	P.1.17	2021-05-31
Mexico|YUC_IBT_IMSS_1438|EPI_ISL_2681333|P.1.17|2021-05-31	Mexico	YUC	YUC_IBT_IMSS_1438	EPI_ISL_2681333	P.1.17	2021-05-31
Mexico|YUC-InDRE_FB16552_S3199|EPI_ISL_2674686|P.1.17|2021-05-31	Mexico	YUC	YUC-InDRE_FB16552_S3199	EPI_ISL_2674686	P.1.17	2021-05-31
Mexico|CMX-INMEGEN-06-01-113|EPI_ISL_2616890|P.1.17|2021-06-01	Mexico	CAM	CMX-INMEGEN-06-01-113	EPI_ISL_2616890	P.1.17	2021-06-01
Mexico|CMX-INMEGEN-06-01-184|EPI_ISL_2616848|P.1.17|2021-06-01	Mexico	CAM	CMX-INMEGEN-06-01-184	EPI_ISL_2616848	P.1.17	2021-06-01
Mexico|MEX-INMEGEN-06-01-78|EPI_ISL_2616830|P.1.17|2021-06-01	Mexico	MEX	MEX-INMEGEN-06-01-78	EPI_ISL_2616830	P.1.17	2021-06-01
Mexico|ROO_IBT_IMSS_1726|EPI_ISL_2681101|P.1.17|2021-06-01	Mexico	ROO	ROO_IBT_IMSS_1726	EPI_ISL_2681101	P.1.17	2021-06-01
Mexico|ROO_IBT_IMSS_1743|EPI_ISL_2681080|P.1.17|2021-06-01	Mexico	ROO	ROO_IBT_IMSS_1743	EPI_ISL_2681080	P.1.17	2021-06-01
Mexico|ROO-INMEGEN-05-06-276|EPI_ISL_2603745|P.1.17|2021-06-01	Mexico	ROO	ROO-INMEGEN-05-06-276	EPI_ISL_2603745	P.1.17	2021-06-01
Mexico|ROO-INMEGEN-05-06-260|EPI_ISL_2603731|P.1.17|2021-06-01	Mexico	ROO	ROO-INMEGEN-05-06-260	EPI_ISL_2603731	P.1.17	2021-06-01
Mexico|ROO-INMEGEN-06-02-330|EPI_ISL_2692816|P.1.17|2021-06-01	Mexico	ROO	ROO-INMEGEN-06-02-330	EPI_ISL_2692816	P.1.17	2021-06-01
Mexico|ROO-INMEGEN-06-01-269|EPI_ISL_2616892|P.1.17|2021-06-01	Mexico	ROO	ROO-INMEGEN-06-01-269	EPI_ISL_2616892	P.1.17	2021-06-01
Mexico|ROO-INMEGEN-05-06-228|EPI_ISL_2603711|P.1.17|2021-06-01	Mexico	ROO	ROO-INMEGEN-05-06-228	EPI_ISL_2603711	P.1.17	2021-06-01
Mexico|ROO-INMEGEN-06-02-316|EPI_ISL_2692806|P.1.17|2021-06-01	Mexico	ROO	ROO-INMEGEN-06-02-316	EPI_ISL_2692806	P.1.17	2021-06-01
Mexico|ROO-INMEGEN-06-02-329|EPI_ISL_2692815|P.1.17|2021-06-01	Mexico	ROO	ROO-INMEGEN-06-02-329	EPI_ISL_2692815	P.1.17	2021-06-01
Mexico|ROO-INMEGEN-06-02-314|EPI_ISL_2692804|P.1.17|2021-06-01	Mexico	ROO	ROO-INMEGEN-06-02-314	EPI_ISL_2692804	P.1.17	2021-06-01
Mexico|ROO-INMEGEN-05-06-237|EPI_ISL_2603717|P.1.17|2021-06-01	Mexico	ROO	ROO-INMEGEN-05-06-237	EPI_ISL_2603717	P.1.17	2021-06-01
Mexico|TAB-INMEGEN-06-02-328|EPI_ISL_2692814|P.1.17|2021-06-01	Mexico	TAB	TAB-INMEGEN-06-02-328	EPI_ISL_2692814	P.1.17	2021-06-01
USA|WA-PHL-000890|EPI_ISL_2557058|P.1.17|2021-06-01	USA	WA-USAP	WA-PHL-000890	EPI_ISL_2557058	P.1.17	2021-06-01
USA|WA-S8977|EPI_ISL_2736147|P.1.17|2021-06-01	USA	WA-USAS	WA-S8977	EPI_ISL_2736147	P.1.17	2021-06-01
Mexico|YUC_IBT_IMSS_1608|EPI_ISL_2681211|P.1.17|2021-06-01	Mexico	YUC	YUC_IBT_IMSS_1608	EPI_ISL_2681211	P.1.17	2021-06-01
Mexico|YUC-INMEGEN-06-02-338|EPI_ISL_2692822|P.1.17|2021-06-01	Mexico	YUC	YUC-INMEGEN-06-02-338	EPI_ISL_2692822	P.1.17	2021-06-01
Mexico|CHH-InDRE_FB16980_S3212|EPI_ISL_2674699|P.1.17|2021-06-02	Mexico	CHH	CHH-InDRE_FB16980_S3212	EPI_ISL_2674699	P.1.17	2021-06-02
Mexico|ROO-INMEGEN-06-01-252|EPI_ISL_2616929|P.1.17|2021-06-02	Mexico	ROO	ROO-INMEGEN-06-01-252	EPI_ISL_2616929	P.1.17	2021-06-02
Mexico|ROO-INMEGEN-06-01-228|EPI_ISL_2616878|P.1.17|2021-06-02	Mexico	ROO	ROO-INMEGEN-06-01-228	EPI_ISL_2616878	P.1.17	2021-06-02
Mexico|ROO-INMEGEN-06-01-236|EPI_ISL_2616869|P.1.17|2021-06-02	Mexico	ROO	ROO-INMEGEN-06-01-236	EPI_ISL_2616869	P.1.17	2021-06-02
Mexico|ROO-IBT_IMSS_10415-NC|EPI_ISL_2801572|P.1.17|2021-06-02	Mexico	ROO	ROO-IBT_IMSS_10415-NC	EPI_ISL_2801572	P.1.17	2021-06-02
Mexico|ROO-INMEGEN-06-01-229|EPI_ISL_2616798|P.1.17|2021-06-02	Mexico	ROO	ROO-INMEGEN-06-01-229	EPI_ISL_2616798	P.1.17	2021-06-02
Mexico|ROO-INMEGEN-06-01-260|EPI_ISL_2616853|P.1.17|2021-06-02	Mexico	ROO	ROO-INMEGEN-06-01-260	EPI_ISL_2616853	P.1.17	2021-06-02
Mexico|ROO-IBT_IMSS_1783|EPI_ISL_2801574|P.1.17|2021-06-02	Mexico	ROO	ROO-IBT_IMSS_1783	EPI_ISL_2801574	P.1.17	2021-06-02
Mexico|ROO-IBT_IMSS_1794|EPI_ISL_2801575|P.1.17|2021-06-02	Mexico	ROO	ROO-IBT_IMSS_1794	EPI_ISL_2801575	P.1.17	2021-06-02
USA|CA-CDPH-3000049509|EPI_ISL_8750685|P.1.17|2021-06-03	USA	CA-USAC	CA-CDPH-3000049509	EPI_ISL_8750685	P.1.17	2021-06-03
USA|CA-CDPH-2000049257|EPI_ISL_3671274|P.1.17|2021-06-03	USA	CA-USAC	CA-CDPH-2000049257	EPI_ISL_3671274	P.1.17	2021-06-03
USA|CA-CDPH-2000049273|EPI_ISL_3671276|P.1.17|2021-06-03	USA	CA-USAC	CA-CDPH-2000049273	EPI_ISL_3671276	P.1.17	2021-06-03
Mexico|ROO-INMEGEN-06-01-202|EPI_ISL_2616843|P.1.17|2021-06-03	Mexico	ROO	ROO-INMEGEN-06-01-202	EPI_ISL_2616843	P.1.17	2021-06-03
Mexico|ROO-INMEGEN-06-01-373|EPI_ISL_2616950|P.1.17|2021-06-03	Mexico	ROO	ROO-INMEGEN-06-01-373	EPI_ISL_2616950	P.1.17	2021-06-03
Mexico|ROO-INMEGEN-06-01-194|EPI_ISL_2616812|P.1.17|2021-06-03	Mexico	ROO	ROO-INMEGEN-06-01-194	EPI_ISL_2616812	P.1.17	2021-06-03
Mexico|ROO-INMEGEN-06-01-281|EPI_ISL_2616831|P.1.17|2021-06-03	Mexico	ROO	ROO-INMEGEN-06-01-281	EPI_ISL_2616831	P.1.17	2021-06-03
Mexico|ROO-InDRE_FB17782_S4303|EPI_ISL_2937765|P.1.17|2021-06-03	Mexico	ROO	ROO-InDRE_FB17782_S4303	EPI_ISL_2937765	P.1.17	2021-06-03
Mexico|ROO-INMEGEN-06-01-249|EPI_ISL_2616872|P.1.17|2021-06-03	Mexico	ROO	ROO-INMEGEN-06-01-249	EPI_ISL_2616872	P.1.17	2021-06-03
Mexico|ROO-INMEGEN-06-01-333|EPI_ISL_2616936|P.1.17|2021-06-03	Mexico	ROO	ROO-INMEGEN-06-01-333	EPI_ISL_2616936	P.1.17	2021-06-03
Mexico|ROO-INMEGEN-06-01-226|EPI_ISL_2616920|P.1.17|2021-06-03	Mexico	ROO	ROO-INMEGEN-06-01-226	EPI_ISL_2616920	P.1.17	2021-06-03
Mexico|ROO-INMEGEN-06-01-272|EPI_ISL_2616818|P.1.17|2021-06-03	Mexico	ROO	ROO-INMEGEN-06-01-272	EPI_ISL_2616818	P.1.17	2021-06-03
Mexico|ROO-InDRE_FB17113_S3227|EPI_ISL_2674714|P.1.17|2021-06-03	Mexico	ROO	ROO-InDRE_FB17113_S3227	EPI_ISL_2674714	P.1.17	2021-06-03
Mexico|ROO-InDRE_FB18940_S4647|EPI_ISL_3033477|P.1.17|2021-06-03	Mexico	ROO	ROO-InDRE_FB18940_S4647	EPI_ISL_3033477	P.1.17	2021-06-03
Mexico|ROO-IBT_IMSS_10504-NC|EPI_ISL_2801590|P.1.17|2021-06-03	Mexico	ROO	ROO-IBT_IMSS_10504-NC	EPI_ISL_2801590	P.1.17	2021-06-03
Mexico|ROO-INMEGEN-06-01-257|EPI_ISL_2616804|P.1.17|2021-06-03	Mexico	ROO	ROO-INMEGEN-06-01-257	EPI_ISL_2616804	P.1.17	2021-06-03
USA|WA-CDC-UW21060319298|EPI_ISL_2549507|P.1.17|2021-06-03	USA	WA-USAC	WA-CDC-UW21060319298	EPI_ISL_2549507	P.1.17	2021-06-03
Mexico|CMX-INER-IBT-1344|EPI_ISL_7747276|P.1.17|2021-06-04	Mexico	CAM	CMX-INER-IBT-1344	EPI_ISL_7747276	P.1.17	2021-06-04
Mexico|ROO-INMEGEN-06-01-297|EPI_ISL_2616945|P.1.17|2021-06-04	Mexico	ROO	ROO-INMEGEN-06-01-297	EPI_ISL_2616945	P.1.17	2021-06-04
Mexico|ROO-IBT_IMSS_1936|EPI_ISL_2801591|P.1.17|2021-06-04	Mexico	ROO	ROO-IBT_IMSS_1936	EPI_ISL_2801591	P.1.17	2021-06-04
Mexico|ROO-INMEGEN-06-01-313|EPI_ISL_2617012|P.1.17|2021-06-04	Mexico	ROO	ROO-INMEGEN-06-01-313	EPI_ISL_2617012	P.1.17	2021-06-04
Mexico|TAB-InDRE_FB19084_S4727|EPI_ISL_3046105|P.1.17|2021-06-04	Mexico	TAB	TAB-InDRE_FB19084_S4727	EPI_ISL_3046105	P.1.17	2021-06-04
Mexico|TAB-IBT_IMSS_2055|EPI_ISL_2801608|P.1.17|2021-06-04	Mexico	TAB	TAB-IBT_IMSS_2055	EPI_ISL_2801608	P.1.17	2021-06-04
Mexico|TAB-IBT_IMSS_2062|EPI_ISL_2801614|P.1.17|2021-06-04	Mexico	TAB	TAB-IBT_IMSS_2062	EPI_ISL_2801614	P.1.17	2021-06-04
Mexico|TAB-IBT_IMSS_2061|EPI_ISL_2801613|P.1.17|2021-06-04	Mexico	TAB	TAB-IBT_IMSS_2061	EPI_ISL_2801613	P.1.17	2021-06-04
USA|WA-CDC-UW21060441885|EPI_ISL_2549450|P.1.17|2021-06-04	USA	WA-USA	WA-CDC-UW21060441885	EPI_ISL_2549450	P.1.17	2021-06-04
USA|WA-CDC-UW21060439741|EPI_ISL_2549440|P.1.17|2021-06-04	USA	WA-USAC	WA-CDC-UW21060439741	EPI_ISL_2549440	P.1.17	2021-06-04
Mexico|YUC-InDRE_FB17537_S3593|EPI_ISL_2779108|P.1.17|2021-06-04	Mexico	YUC	YUC-InDRE_FB17537_S3593	EPI_ISL_2779108	P.1.17	2021-06-04
Mexico|YUC-INMEGEN-06-01-304|EPI_ISL_2616942|P.1.17|2021-06-04	Mexico	YUC	YUC-INMEGEN-06-01-304	EPI_ISL_2616942	P.1.17	2021-06-04
Mexico|ROO-InDRE_FB17789_S3670|EPI_ISL_2779177|P.1.17|2021-06-05	Mexico	ROO	ROO-InDRE_FB17789_S3670	EPI_ISL_2779177	P.1.17	2021-06-05
Mexico|ROO-InDRE_FB17788_S3669|EPI_ISL_2779176|P.1.17|2021-06-05	Mexico	ROO	ROO-InDRE_FB17788_S3669	EPI_ISL_2779176	P.1.17	2021-06-05
Mexico|ROO-INMEGEN-06-02-68|EPI_ISL_2692600|P.1.17|2021-06-05	Mexico	ROO	ROO-INMEGEN-06-02-68	EPI_ISL_2692600	P.1.17	2021-06-05
Mexico|ROO-IBT_IMSS_2089|EPI_ISL_2801637|P.1.17|2021-06-05	Mexico	ROO	ROO-IBT_IMSS_2089	EPI_ISL_2801637	P.1.17	2021-06-05
Mexico|ROO-INMEGEN-06-01-369|EPI_ISL_2616956|P.1.17|2021-06-05	Mexico	ROO	ROO-INMEGEN-06-01-369	EPI_ISL_2616956	P.1.17	2021-06-05
USA|WA-PHL-000950|EPI_ISL_2651066|P.1.17|2021-06-05	USA	WA-USAP	WA-PHL-000950	EPI_ISL_2651066	P.1.17	2021-06-05
Mexico|YUC-IBT_IMSS_2016|EPI_ISL_2801599|P.1.17|2021-06-05	Mexico	YUC	YUC-IBT_IMSS_2016	EPI_ISL_2801599	P.1.17	2021-06-05
Mexico|YUC-InDRE_FB18944_S4649|EPI_ISL_3033478|P.1.17|2021-06-05	Mexico	YUC	YUC-InDRE_FB18944_S4649	EPI_ISL_3033478	P.1.17	2021-06-05
Mexico|ROO-INMEGEN-06-02-37|EPI_ISL_2692572|P.1.17|2021-06-06	Mexico	ROO	ROO-INMEGEN-06-02-37	EPI_ISL_2692572	P.1.17	2021-06-06
Mexico|ROO-INMEGEN-06-02-90|EPI_ISL_2692620|P.1.17|2021-06-06	Mexico	ROO	ROO-INMEGEN-06-02-90	EPI_ISL_2692620	P.1.17	2021-06-06
Mexico|ROO-IBT_IMSS_2081|EPI_ISL_2801631|P.1.17|2021-06-06	Mexico	ROO	ROO-IBT_IMSS_2081	EPI_ISL_2801631	P.1.17	2021-06-06
Mexico|ROO-INMEGEN-06-02-93|EPI_ISL_2692623|P.1.17|2021-06-06	Mexico	ROO	ROO-INMEGEN-06-02-93	EPI_ISL_2692623	P.1.17	2021-06-06
Mexico|ROO-INMEGEN-06-02-50|EPI_ISL_2692585|P.1.17|2021-06-06	Mexico	ROO	ROO-INMEGEN-06-02-50	EPI_ISL_2692585	P.1.17	2021-06-06
Mexico|ROO-IBT_IMSS_2095|EPI_ISL_2801643|P.1.17|2021-06-06	Mexico	ROO	ROO-IBT_IMSS_2095	EPI_ISL_2801643	P.1.17	2021-06-06
Mexico|YUC-INMEGEN-06-02-20|EPI_ISL_2692556|P.1.17|2021-06-06	Mexico	YUC	YUC-INMEGEN-06-02-20	EPI_ISL_2692556	P.1.17	2021-06-06
Mexico|ROO-INMEGEN-06-02-112|EPI_ISL_2692638|P.1.17|2021-06-07	Mexico	ROO	ROO-INMEGEN-06-02-112	EPI_ISL_2692638	P.1.17	2021-06-07
Mexico|ROO-INMEGEN-06-02-29|EPI_ISL_2692564|P.1.17|2021-06-07	Mexico	ROO	ROO-INMEGEN-06-02-29	EPI_ISL_2692564	P.1.17	2021-06-07
Mexico|ROO-INMEGEN-06-02-159|EPI_ISL_2692675|P.1.17|2021-06-07	Mexico	ROO	ROO-INMEGEN-06-02-159	EPI_ISL_2692675	P.1.17	2021-06-07
Mexico|ROO-InDRE_FB17790_S3671|EPI_ISL_2779178|P.1.17|2021-06-07	Mexico	ROO	ROO-InDRE_FB17790_S3671	EPI_ISL_2779178	P.1.17	2021-06-07
Mexico|ROO-InDRE_FB17792_S3673|EPI_ISL_2779180|P.1.17|2021-06-07	Mexico	ROO	ROO-InDRE_FB17792_S3673	EPI_ISL_2779180	P.1.17	2021-06-07
Mexico|ROO-INMEGEN-06-02-14|EPI_ISL_2692551|P.1.17|2021-06-07	Mexico	ROO	ROO-INMEGEN-06-02-14	EPI_ISL_2692551	P.1.17	2021-06-07
Mexico|ROO-IBT_IMSS_2092|EPI_ISL_2801640|P.1.17|2021-06-07	Mexico	ROO	ROO-IBT_IMSS_2092	EPI_ISL_2801640	P.1.17	2021-06-07
Mexico|ROO-IBT_IMSS_2091|EPI_ISL_2801639|P.1.17|2021-06-07	Mexico	ROO	ROO-IBT_IMSS_2091	EPI_ISL_2801639	P.1.17	2021-06-07
Mexico|ROO-INMEGEN-06-02-97|EPI_ISL_2692625|P.1.17|2021-06-07	Mexico	ROO	ROO-INMEGEN-06-02-97	EPI_ISL_2692625	P.1.17	2021-06-07
Mexico|ROO-INMEGEN-06-02-167|EPI_ISL_2692683|P.1.17|2021-06-07	Mexico	ROO	ROO-INMEGEN-06-02-167	EPI_ISL_2692683	P.1.17	2021-06-07
Mexico|ROO-INMEGEN-06-02-175|EPI_ISL_2692690|P.1.17|2021-06-07	Mexico	ROO	ROO-INMEGEN-06-02-175	EPI_ISL_2692690	P.1.17	2021-06-07
Mexico|ROO-INMEGEN-06-02-85|EPI_ISL_2692615|P.1.17|2021-06-07	Mexico	ROO	ROO-INMEGEN-06-02-85	EPI_ISL_2692615	P.1.17	2021-06-07
Mexico|TAB-InDRE_FB17033_S3150|EPI_ISL_2674637|P.1.17|2021-06-07	Mexico	TAB	TAB-InDRE_FB17033_S3150	EPI_ISL_2674637	P.1.17	2021-06-07
Mexico|TAB-INMEGEN-06-02-111|EPI_ISL_2692637|P.1.17|2021-06-07	Mexico	TAB	TAB-INMEGEN-06-02-111	EPI_ISL_2692637	P.1.17	2021-06-07
Mexico|TAB-INMEGEN-06-02-118|EPI_ISL_2692643|P.1.17|2021-06-07	Mexico	TAB	TAB-INMEGEN-06-02-118	EPI_ISL_2692643	P.1.17	2021-06-07
Mexico|YUC-InDRE_FB17563_S3615|EPI_ISL_2800918|P.1.17|2021-06-07	Mexico	YUC	YUC-InDRE_FB17563_S3615	EPI_ISL_2800918	P.1.17	2021-06-07
Mexico|YUC-InDRE_FB17109_S3225|EPI_ISL_2674712|P.1.17|2021-06-07	Mexico	YUC	YUC-InDRE_FB17109_S3225	EPI_ISL_2674712	P.1.17	2021-06-07
Mexico|YUC-IBT_IMSS_2072|EPI_ISL_2801622|P.1.17|2021-06-07	Mexico	YUC	YUC-IBT_IMSS_2072	EPI_ISL_2801622	P.1.17	2021-06-07
Mexico|YUC-InDRE_FB17549_S3601|EPI_ISL_2779115|P.1.17|2021-06-07	Mexico	YUC	YUC-InDRE_FB17549_S3601	EPI_ISL_2779115	P.1.17	2021-06-07
Mexico|YUC-InDRE_FB17105_S3222|EPI_ISL_2674709|P.1.17|2021-06-07	Mexico	YUC	YUC-InDRE_FB17105_S3222	EPI_ISL_2674709	P.1.17	2021-06-07
Mexico|YUC-InDRE_FB17104_S3221|EPI_ISL_2674708|P.1.17|2021-06-07	Mexico	YUC	YUC-InDRE_FB17104_S3221	EPI_ISL_2674708	P.1.17	2021-06-07
Mexico|ROO-INMEGEN-06-02-153|EPI_ISL_2692670|P.1.17|2021-06-08	Mexico	ROO	ROO-INMEGEN-06-02-153	EPI_ISL_2692670	P.1.17	2021-06-08
Mexico|ROO-INMEGEN-06-02-154|EPI_ISL_2692671|P.1.17|2021-06-08	Mexico	ROO	ROO-INMEGEN-06-02-154	EPI_ISL_2692671	P.1.17	2021-06-08
Mexico|ROO-INMEGEN-06-02-186|EPI_ISL_2692699|P.1.17|2021-06-08	Mexico	ROO	ROO-INMEGEN-06-02-186	EPI_ISL_2692699	P.1.17	2021-06-08
Mexico|ROO-INMEGEN-06-02-138|EPI_ISL_2692659|P.1.17|2021-06-08	Mexico	ROO	ROO-INMEGEN-06-02-138	EPI_ISL_2692659	P.1.17	2021-06-08
Mexico|ROO-INMEGEN-06-03-375|EPI_ISL_2810325|P.1.17.1|2021-06-08	Mexico	ROO	ROO-INMEGEN-06-03-375	EPI_ISL_2810325	P.1.17.1	2021-06-08
Mexico|ROO-INMEGEN-06-03-304|EPI_ISL_2810264|P.1.17|2021-06-08	Mexico	ROO	ROO-INMEGEN-06-03-304	EPI_ISL_2810264	P.1.17	2021-06-08
Mexico|ROO-INMEGEN-06-02-169|EPI_ISL_2692685|P.1.17|2021-06-08	Mexico	ROO	ROO-INMEGEN-06-02-169	EPI_ISL_2692685	P.1.17	2021-06-08
Mexico|ROO-INMEGEN-06-02-131|EPI_ISL_2692652|P.1.17|2021-06-08	Mexico	ROO	ROO-INMEGEN-06-02-131	EPI_ISL_2692652	P.1.17	2021-06-08
Mexico|ROO-IBT_IMSS_2096|EPI_ISL_2801644|P.1.17|2021-06-08	Mexico	ROO	ROO-IBT_IMSS_2096	EPI_ISL_2801644	P.1.17	2021-06-08
Mexico|ROO-INMEGEN-06-02-100|EPI_ISL_2692628|P.1.17|2021-06-08	Mexico	ROO	ROO-INMEGEN-06-02-100	EPI_ISL_2692628	P.1.17	2021-06-08
Mexico|TAB-INMEGEN-06-02-286|EPI_ISL_2692782|P.1.17|2021-06-08	Mexico	TAB	TAB-INMEGEN-06-02-286	EPI_ISL_2692782	P.1.17	2021-06-08
Mexico|TAB-INMEGEN-06-03-119|EPI_ISL_2810114|P.1.17|2021-06-08	Mexico	TAB	TAB-INMEGEN-06-03-119	EPI_ISL_2810114	P.1.17	2021-06-08
Mexico|TAB-INMEGEN-06-03-103|EPI_ISL_2810102|P.1.17|2021-06-08	Mexico	TAB	TAB-INMEGEN-06-03-103	EPI_ISL_2810102	P.1.17	2021-06-08
Mexico|YUC-INMEGEN-06-02-161|EPI_ISL_2692677|P.1.17|2021-06-08	Mexico	YUC	YUC-INMEGEN-06-02-161	EPI_ISL_2692677	P.1.17	2021-06-08
Mexico|YUC-INMEGEN-06-02-147|EPI_ISL_2692666|P.1.17|2021-06-08	Mexico	YUC	YUC-INMEGEN-06-02-147	EPI_ISL_2692666	P.1.17	2021-06-08
Mexico|YUC-INMEGEN-06-02-180|EPI_ISL_2692693|P.1.17|2021-06-08	Mexico	YUC	YUC-INMEGEN-06-02-180	EPI_ISL_2692693	P.1.17	2021-06-08
USA|CT-CDC-QDX25806491|EPI_ISL_2876139|P.1.17|2021-06-09	USA	CT-USAC	CT-CDC-QDX25806491	EPI_ISL_2876139	P.1.17	2021-06-09
Mexico|ROO-INMEGEN-06-03-359|EPI_ISL_2810311|P.1.17|2021-06-09	Mexico	ROO	ROO-INMEGEN-06-03-359	EPI_ISL_2810311	P.1.17	2021-06-09
Mexico|ROO-INMEGEN-06-04-93|EPI_ISL_2894234|P.1.17|2021-06-09	Mexico	ROO	ROO-INMEGEN-06-04-93	EPI_ISL_2894234	P.1.17	2021-06-09
Mexico|ROO-INMEGEN-06-04-61|EPI_ISL_2894205|P.1.17|2021-06-09	Mexico	ROO	ROO-INMEGEN-06-04-61	EPI_ISL_2894205	P.1.17	2021-06-09
Mexico|ROO-INMEGEN-06-04-69|EPI_ISL_2894213|P.1.17|2021-06-09	Mexico	ROO	ROO-INMEGEN-06-04-69	EPI_ISL_2894213	P.1.17	2021-06-09
Mexico|ROO-InDRE_FB17791_S3672|EPI_ISL_2779179|P.1.17|2021-06-09	Mexico	ROO	ROO-InDRE_FB17791_S3672	EPI_ISL_2779179	P.1.17	2021-06-09
Mexico|ROO-INMEGEN-06-04-37|EPI_ISL_2894182|P.1.17|2021-06-09	Mexico	ROO	ROO-INMEGEN-06-04-37	EPI_ISL_2894182	P.1.17	2021-06-09
Mexico|TAB-InDRE_FB17286_S3691|EPI_ISL_2779194|P.1.17|2021-06-09	Mexico	TAB	TAB-InDRE_FB17286_S3691	EPI_ISL_2779194	P.1.17	2021-06-09
Mexico|TAB-INMEGEN-06-03-321|EPI_ISL_6253799|P.1.17|2021-06-09	Mexico	TAB	TAB-INMEGEN-06-03-321	EPI_ISL_6253799	P.1.17	2021-06-09
Mexico|YUC-INMEGEN-06-04-11|EPI_ISL_2894161|P.1.17|2021-06-09	Mexico	YUC	YUC-INMEGEN-06-04-11	EPI_ISL_2894161	P.1.17	2021-06-09
Mexico|YUC-InDRE_FB17573_S3623|EPI_ISL_2779134|P.1.17|2021-06-09	Mexico	YUC	YUC-InDRE_FB17573_S3623	EPI_ISL_2779134	P.1.17	2021-06-09
USA|CA-CDC-FG-037406|EPI_ISL_2686436|P.1.17|2021-06-10	USA	CA-USAC	CA-CDC-FG-037406	EPI_ISL_2686436	P.1.17	2021-06-10
Mexico|CMX-INMEGEN-06-03-236|EPI_ISL_2842804|P.1.17|2021-06-10	Mexico	CAM	CMX-INMEGEN-06-03-236	EPI_ISL_2842804	P.1.17	2021-06-10
Mexico|ROO-INMEGEN-06-04-86|EPI_ISL_2894229|P.1.17|2021-06-10	Mexico	ROO	ROO-INMEGEN-06-04-86	EPI_ISL_2894229	P.1.17	2021-06-10
Mexico|ROO-INMEGEN-06-04-78|EPI_ISL_2894222|P.1.17|2021-06-10	Mexico	ROO	ROO-INMEGEN-06-04-78	EPI_ISL_2894222	P.1.17	2021-06-10
Mexico|ROO-INMEGEN-06-04-77|EPI_ISL_2894221|P.1.17|2021-06-10	Mexico	ROO	ROO-INMEGEN-06-04-77	EPI_ISL_2894221	P.1.17	2021-06-10
Mexico|ROO-INMEGEN-06-04-85|EPI_ISL_2894228|P.1.17|2021-06-10	Mexico	ROO	ROO-INMEGEN-06-04-85	EPI_ISL_2894228	P.1.17	2021-06-10
Mexico|ROO-INMEGEN-06-04-46|EPI_ISL_2894190|P.1.17|2021-06-10	Mexico	ROO	ROO-INMEGEN-06-04-46	EPI_ISL_2894190	P.1.17	2021-06-10
Mexico|ROO-InDRE_FB17773_S4297|EPI_ISL_2937759|P.1.17|2021-06-10	Mexico	ROO	ROO-InDRE_FB17773_S4297	EPI_ISL_2937759	P.1.17	2021-06-10
Mexico|JAL-InDRE_FB17403_S3980|EPI_ISL_2858994|P.1.17|2021-06-11	Mexico	JAL	JAL-InDRE_FB17403_S3980	EPI_ISL_2858994	P.1.17	2021-06-11
Mexico|NLE-IBT_IMSS_65959-NC|EPI_ISL_2801684|P.1.17|2021-06-11	Mexico	NLE	NLE-IBT_IMSS_65959-NC	EPI_ISL_2801684	P.1.17	2021-06-11
Mexico|ROO-InDRE_FB17780_S4301|EPI_ISL_2937763|P.1.17|2021-06-11	Mexico	ROO	ROO-InDRE_FB17780_S4301	EPI_ISL_2937763	P.1.17	2021-06-11
Mexico|ROO-INMEGEN-06-04-318|EPI_ISL_2894365|P.1.17|2021-06-11	Mexico	ROO	ROO-INMEGEN-06-04-318	EPI_ISL_2894365	P.1.17	2021-06-11
Mexico|ROO-INMEGEN-06-04-315|EPI_ISL_2894362|P.1.17|2021-06-11	Mexico	ROO	ROO-INMEGEN-06-04-315	EPI_ISL_2894362	P.1.17	2021-06-11
Mexico|TAB-InDRE_FB17655_S3655|EPI_ISL_2779162|P.1.17|2021-06-11	Mexico	TAB	TAB-InDRE_FB17655_S3655	EPI_ISL_2779162	P.1.17	2021-06-11
Mexico|TAB-InDRE_FB17653_S3654|EPI_ISL_2779161|P.1.17|2021-06-11	Mexico	TAB	TAB-InDRE_FB17653_S3654	EPI_ISL_2779161	P.1.17	2021-06-11
Mexico|TAB-InDRE_FB17661_S3657|EPI_ISL_2779164|P.1.17|2021-06-11	Mexico	TAB	TAB-InDRE_FB17661_S3657	EPI_ISL_2779164	P.1.17	2021-06-11
Mexico|TAB-InDRE_FB17670_S3660|EPI_ISL_2779167|P.1.17|2021-06-11	Mexico	TAB	TAB-InDRE_FB17670_S3660	EPI_ISL_2779167	P.1.17	2021-06-11
Mexico|CMX-INER-IBT-0272|EPI_ISL_2777227|P.1.17|2021-06-12	Mexico	CAM	CMX-INER-IBT-0272	EPI_ISL_2777227	P.1.17	2021-06-12
USA|NJ-CDC-LC0072713|EPI_ISL_4382531|P.1.17|2021-06-12	USA	NJ-USAC	NJ-CDC-LC0072713	EPI_ISL_4382531	P.1.17	2021-06-12
Mexico|ROO-INMEGEN-06-04-314|EPI_ISL_2894361|P.1.17|2021-06-12	Mexico	ROO	ROO-INMEGEN-06-04-314	EPI_ISL_2894361	P.1.17	2021-06-12
Mexico|ROO-InDRE_FB18301_S4337|EPI_ISL_2937799|P.1.17|2021-06-12	Mexico	ROO	ROO-InDRE_FB18301_S4337	EPI_ISL_2937799	P.1.17	2021-06-12
Mexico|ROO-INMEGEN-06-04-337|EPI_ISL_2894381|P.1.17|2021-06-12	Mexico	ROO	ROO-INMEGEN-06-04-337	EPI_ISL_2894381	P.1.17	2021-06-12
Mexico|TAB-INMEGEN-06-04-335|EPI_ISL_2894379|P.1.17|2021-06-12	Mexico	TAB	TAB-INMEGEN-06-04-335	EPI_ISL_2894379	P.1.17	2021-06-12
Mexico|TAB-InDRE_FB17672_S3661|EPI_ISL_2779168|P.1.17|2021-06-12	Mexico	TAB	TAB-InDRE_FB17672_S3661	EPI_ISL_2779168	P.1.17	2021-06-12
Mexico|YUC-INMEGEN-06-04-291|EPI_ISL_2894338|P.1.17|2021-06-12	Mexico	YUC	YUC-INMEGEN-06-04-291	EPI_ISL_2894338	P.1.17	2021-06-12
Mexico|MEX-INMEGEN-06-02-276|EPI_ISL_2692774|P.1.17|2021-06-13	Mexico	MEX	MEX-INMEGEN-06-02-276	EPI_ISL_2692774	P.1.17	2021-06-13
USA|NC-CDC-LC0072817|EPI_ISL_4382502|P.1.17|2021-06-13	USA	NC-USA	NC-CDC-LC0072817	EPI_ISL_4382502	P.1.17	2021-06-13
USA|NY-PRL-2021_0615_00B07|EPI_ISL_2634965|P.1.17|2021-06-13	USA	NY-USAP	NY-PRL-2021_0615_00B07	EPI_ISL_2634965	P.1.17	2021-06-13
Mexico|TAB-InDRE_FB17682_S3664|EPI_ISL_2779171|P.1.17|2021-06-13	Mexico	TAB	TAB-InDRE_FB17682_S3664	EPI_ISL_2779171	P.1.17	2021-06-13
Mexico|YUC-InDRE_FB17610_S3650|EPI_ISL_2779157|P.1.17|2021-06-13	Mexico	YUC	YUC-InDRE_FB17610_S3650	EPI_ISL_2779157	P.1.17	2021-06-13
Mexico|YUC-InDRE_FB17609_S3649|EPI_ISL_2779156|P.1.17|2021-06-13	Mexico	YUC	YUC-InDRE_FB17609_S3649	EPI_ISL_2779156	P.1.17	2021-06-13
USA|CA-CDC-ASC210109285|EPI_ISL_2832571|P.1.17|2021-06-14	USA	CA-USAC	CA-CDC-ASC210109285	EPI_ISL_2832571	P.1.17	2021-06-14
USA|GA-EHC-1532Z|EPI_ISL_2928442|P.1.17|2021-06-14	USA	GA-USAE	GA-EHC-1532Z	EPI_ISL_2928442	P.1.17	2021-06-14
USA|NV-NSPHL-368275|EPI_ISL_2690272|P.1.17|2021-06-14	USA	NV-USAN	NV-NSPHL-368275	EPI_ISL_2690272	P.1.17	2021-06-14
Mexico|ROO-INMEGEN-16-285|EPI_ISL_2978596|P.1.17|2021-06-14	Mexico	ROO	ROO-INMEGEN-16-285	EPI_ISL_2978596	P.1.17	2021-06-14
Mexico|YUC-INMEGEN-17-117|EPI_ISL_3067929|P.1.17|2021-06-14	Mexico	YUC	YUC-INMEGEN-17-117	EPI_ISL_3067929	P.1.17	2021-06-14
Mexico|YUC-InDRE_FB17458_S3993|EPI_ISL_2859007|P.1.17|2021-06-14	Mexico	YUC	YUC-InDRE_FB17458_S3993	EPI_ISL_2859007	P.1.17	2021-06-14
USA|CA-CDC-QDX25931033|EPI_ISL_4370427|P.1.17|2021-06-15	USA	CA-USAC	CA-CDC-QDX25931033	EPI_ISL_4370427	P.1.17	2021-06-15
USA|CA-CDC-QDX25931032|EPI_ISL_4366814|P.1.17|2021-06-15	USA	CA-USAC	CA-CDC-QDX25931032	EPI_ISL_4366814	P.1.17	2021-06-15
USA|CA-CDC-FG-037618|EPI_ISL_2686649|P.1.17|2021-06-15	USA	CA-USAC	CA-CDC-FG-037618	EPI_ISL_2686649	P.1.17	2021-06-15
USA|FL-BPHL-4956|EPI_ISL_2836780|P.1.17|2021-06-15	USA	FL-USAB	FL-BPHL-4956	EPI_ISL_2836780	P.1.17	2021-06-15
USA|NJ-CDC-QDX26115764|EPI_ISL_2876786|P.1.17|2021-06-15	USA	NJ-USAC	NJ-CDC-QDX26115764	EPI_ISL_2876786	P.1.17	2021-06-15
Mexico|ROO-InDRE_FB18303_S4338|EPI_ISL_2937800|P.1.17|2021-06-15	Mexico	ROO	ROO-InDRE_FB18303_S4338	EPI_ISL_2937800	P.1.17	2021-06-15
Mexico|ROO-InDRE_FB19238_S4753|EPI_ISL_3033576|P.1.17|2021-06-15	Mexico	ROO	ROO-InDRE_FB19238_S4753	EPI_ISL_3033576	P.1.17	2021-06-15
Mexico|TAB-InDRE_FB17808_S3675|EPI_ISL_2779182|P.1.17|2021-06-15	Mexico	TAB	TAB-InDRE_FB17808_S3675	EPI_ISL_2779182	P.1.17	2021-06-15
USA|CA-HLX-STM-0006095-G04|EPI_ISL_9547944|P.1.17|2021-06-16	USA	CA-USAH	CA-HLX-STM-0006095-G04	EPI_ISL_9547944	P.1.17	2021-06-16
Mexico|NLE-LANGEBIO_IMSS_1356|EPI_ISL_2942487|P.1.17|2021-06-16	Mexico	NLE	NLE-LANGEBIO_IMSS_1356	EPI_ISL_2942487	P.1.17	2021-06-16
Mexico|ROO-LANGEBIO_IMSS_1172|EPI_ISL_2942333|P.1.17|2021-06-16	Mexico	ROO	ROO-LANGEBIO_IMSS_1172	EPI_ISL_2942333	P.1.17	2021-06-16
Mexico|ROO-LANGEBIO_IMSS_1170|EPI_ISL_2942331|P.1.17|2021-06-16	Mexico	ROO	ROO-LANGEBIO_IMSS_1170	EPI_ISL_2942331	P.1.17	2021-06-16
Mexico|TAB-InDRE_FB17991_S4004|EPI_ISL_2859018|P.1.17|2021-06-16	Mexico	TAB	TAB-InDRE_FB17991_S4004	EPI_ISL_2859018	P.1.17	2021-06-16
Mexico|YUC-INMEGEN-16-365|EPI_ISL_2978668|P.1.17|2021-06-16	Mexico	YUC	YUC-INMEGEN-16-365	EPI_ISL_2978668	P.1.17	2021-06-16
Mexico|ROO-LANGEBIO_IMSS_1185|EPI_ISL_2942346|P.1.17|2021-06-17	Mexico	ROO	ROO-LANGEBIO_IMSS_1185	EPI_ISL_2942346	P.1.17	2021-06-17
Mexico|ROO-LANGEBIO_IMSS_1167|EPI_ISL_2942329|P.1.17|2021-06-17	Mexico	ROO	ROO-LANGEBIO_IMSS_1167	EPI_ISL_2942329	P.1.17	2021-06-17
Mexico|ROO-InDRE_FB18984_S4680|EPI_ISL_3033508|P.1.17|2021-06-17	Mexico	ROO	ROO-InDRE_FB18984_S4680	EPI_ISL_3033508	P.1.17	2021-06-17
Mexico|ROO-LANGEBIO_IMSS_1183|EPI_ISL_2942344|P.1.17|2021-06-17	Mexico	ROO	ROO-LANGEBIO_IMSS_1183	EPI_ISL_2942344	P.1.17	2021-06-17
Mexico|TAB-InDRE_FB18496_S4355|EPI_ISL_2937817|P.1.17|2021-06-17	Mexico	TAB	TAB-InDRE_FB18496_S4355	EPI_ISL_2937817	P.1.17	2021-06-17
Mexico|TAB-InDRE_FB18495_S4354|EPI_ISL_2937816|P.1.17|2021-06-17	Mexico	TAB	TAB-InDRE_FB18495_S4354	EPI_ISL_2937816	P.1.17	2021-06-17
Mexico|TAB-InDRE_FB18497_S4356|EPI_ISL_2937818|P.1.17|2021-06-17	Mexico	TAB	TAB-InDRE_FB18497_S4356	EPI_ISL_2937818	P.1.17	2021-06-17
Mexico|YUC-InDRE_FB18971_S4669|EPI_ISL_3033497|P.1.17|2021-06-17	Mexico	YUC	YUC-InDRE_FB18971_S4669	EPI_ISL_3033497	P.1.17	2021-06-17
Mexico|DUR-LANGEBIO_IMSS_1370|EPI_ISL_2942500|P.1.17|2021-06-18	Mexico	DUR	DUR-LANGEBIO_IMSS_1370	EPI_ISL_2942500	P.1.17	2021-06-18
Mexico|ROO-LANGEBIO_IMSS_1192|EPI_ISL_2942353|P.1.17|2021-06-18	Mexico	ROO	ROO-LANGEBIO_IMSS_1192	EPI_ISL_2942353	P.1.17	2021-06-18
Mexico|ROO-LANGEBIO_IMSS_1182|EPI_ISL_2942343|P.1.17|2021-06-18	Mexico	ROO	ROO-LANGEBIO_IMSS_1182	EPI_ISL_2942343	P.1.17	2021-06-18
Mexico|SLP-LANGEBIO_IMSS_1329|EPI_ISL_2942473|P.1.17|2021-06-18	Mexico	SLP	SLP-LANGEBIO_IMSS_1329	EPI_ISL_2942473	P.1.17	2021-06-18
Mexico|YUC-InDRE_FB18983_S4679|EPI_ISL_3033507|P.1.17|2021-06-18	Mexico	YUC	YUC-InDRE_FB18983_S4679	EPI_ISL_3033507	P.1.17	2021-06-18
Mexico|CHP-LANGEBIO_IMSS_1420|EPI_ISL_2942544|P.1.17|2021-06-19	Mexico	CAM	CHP-LANGEBIO_IMSS_1420	EPI_ISL_2942544	P.1.17	2021-06-19
Mexico|ROO-LANGEBIO_IMSS_1194|EPI_ISL_2942355|P.1.17|2021-06-19	Mexico	ROO	ROO-LANGEBIO_IMSS_1194	EPI_ISL_2942355	P.1.17	2021-06-19
USA|WA-CDC-UW21061963751|EPI_ISL_2693183|P.1.17|2021-06-19	USA	WA-USAC	WA-CDC-UW21061963751	EPI_ISL_2693183	P.1.17	2021-06-19
Mexico|YUC-InDRE_FB18987_S4683|EPI_ISL_3033511|P.1.17|2021-06-19	Mexico	YUC	YUC-InDRE_FB18987_S4683	EPI_ISL_3033511	P.1.17	2021-06-19
Mexico|YUC-InDRE_FB18992_S4687|EPI_ISL_3033515|P.1.17|2021-06-19	Mexico	YUC	YUC-InDRE_FB18992_S4687	EPI_ISL_3033515	P.1.17	2021-06-19
Mexico|YUC-LANGEBIO_IMSS_1188|EPI_ISL_2942349|P.1.17|2021-06-19	Mexico	YUC	YUC-LANGEBIO_IMSS_1188	EPI_ISL_2942349	P.1.17	2021-06-19
Mexico|YUC-InDRE_FB18990_S4685|EPI_ISL_3033513|P.1.17|2021-06-19	Mexico	YUC	YUC-InDRE_FB18990_S4685	EPI_ISL_3033513	P.1.17	2021-06-19
Mexico|YUC-InDRE_FB18993_S4688|EPI_ISL_3033516|P.1.17|2021-06-19	Mexico	YUC	YUC-InDRE_FB18993_S4688	EPI_ISL_3033516	P.1.17	2021-06-19
Mexico|ROO-LANGEBIO_IMSS_1209|EPI_ISL_2942370|P.1.17|2021-06-20	Mexico	ROO	ROO-LANGEBIO_IMSS_1209	EPI_ISL_2942370	P.1.17	2021-06-20
USA|AZ-CDC-LC0085029|EPI_ISL_2927314|P.1.17|2021-06-21	USA	AZ-USAC	AZ-CDC-LC0085029	EPI_ISL_2927314	P.1.17	2021-06-21
USA|CA-CDC-QDX26177623|EPI_ISL_2876863|P.1.17|2021-06-21	USA	CA-USAC	CA-CDC-QDX26177623	EPI_ISL_2876863	P.1.17	2021-06-21
USA|NJ-CDC-ASC210110646|EPI_ISL_3305316|P.1.17|2021-06-21	USA	NJ-USAC	NJ-CDC-ASC210110646	EPI_ISL_3305316	P.1.17	2021-06-21
Mexico|ROO-LANGEBIO_IMSS_1210|EPI_ISL_2942371|P.1.17|2021-06-21	Mexico	ROO	ROO-LANGEBIO_IMSS_1210	EPI_ISL_2942371	P.1.17	2021-06-21
Mexico|ROO-LANGEBIO_IMSS_1234|EPI_ISL_2942395|P.1.17|2021-06-21	Mexico	ROO	ROO-LANGEBIO_IMSS_1234	EPI_ISL_2942395	P.1.17	2021-06-21
Mexico|TAB-InDRE_FB18189_S4028|EPI_ISL_2859042|P.1.17|2021-06-21	Mexico	TAB	TAB-InDRE_FB18189_S4028	EPI_ISL_2859042	P.1.17	2021-06-21
Mexico|TAB-InDRE_FB18195_S4031|EPI_ISL_2859045|P.1.17|2021-06-21	Mexico	TAB	TAB-InDRE_FB18195_S4031	EPI_ISL_2859045	P.1.17	2021-06-21
Mexico|TAB-InDRE_FB18206_S4034|EPI_ISL_2859048|P.1.17|2021-06-21	Mexico	TAB	TAB-InDRE_FB18206_S4034	EPI_ISL_2859048	P.1.17	2021-06-21
Mexico|TAB-InDRE_FB18185_S4026|EPI_ISL_2859040|P.1.17|2021-06-21	Mexico	TAB	TAB-InDRE_FB18185_S4026	EPI_ISL_2859040	P.1.17	2021-06-21
Mexico|TAB-InDRE_FB18188_S4027|EPI_ISL_2859041|P.1.17|2021-06-21	Mexico	TAB	TAB-InDRE_FB18188_S4027	EPI_ISL_2859041	P.1.17	2021-06-21
Mexico|TAB-InDRE_FB18203_S4033|EPI_ISL_2859047|P.1.17|2021-06-21	Mexico	TAB	TAB-InDRE_FB18203_S4033	EPI_ISL_2859047	P.1.17	2021-06-21
USA|WA-PHL-001026|EPI_ISL_2716472|P.1.17|2021-06-21	USA	WA-USAP	WA-PHL-001026	EPI_ISL_2716472	P.1.17	2021-06-21
Mexico|YUC_LANGEBIO_IMSS_12057-NC|EPI_ISL_2970081|P.1.17|2021-06-21	Mexico	YUC	YUC_LANGEBIO_IMSS_12057-NC	EPI_ISL_2970081	P.1.17	2021-06-21
Mexico|YUC_LANGEBIO_IMSS_12001-NC|EPI_ISL_2970080|P.1.17|2021-06-21	Mexico	YUC	YUC_LANGEBIO_IMSS_12001-NC	EPI_ISL_2970080	P.1.17	2021-06-21
Mexico|YUC-InDRE_FB18996_S4691|EPI_ISL_3033518|P.1.17|2021-06-21	Mexico	YUC	YUC-InDRE_FB18996_S4691	EPI_ISL_3033518	P.1.17	2021-06-21
USA|CA-CDC-FG-038318|EPI_ISL_2785779|P.1.17|2021-06-22	USA	CA-USAC	CA-CDC-FG-038318	EPI_ISL_2785779	P.1.17	2021-06-22
Mexico|CMX-INMEGEN-06-03-200|EPI_ISL_2810179|P.1.17|2021-06-22	Mexico	CAM	CMX-INMEGEN-06-03-200	EPI_ISL_2810179	P.1.17	2021-06-22
USA|NE-TESTNE_A1KU9TM|EPI_ISL_2774536|P.1.17|2021-06-22	USA	NE-USAT	NE-TESTNE_A1KU9TM	EPI_ISL_2774536	P.1.17	2021-06-22
Mexico|ROO-LANGEBIO_IMSS_1238|EPI_ISL_2942399|P.1.17|2021-06-22	Mexico	ROO	ROO-LANGEBIO_IMSS_1238	EPI_ISL_2942399	P.1.17	2021-06-22
Mexico|ROO-LANGEBIO_IMSS_1244|EPI_ISL_2942405|P.1.17|2021-06-22	Mexico	ROO	ROO-LANGEBIO_IMSS_1244	EPI_ISL_2942405	P.1.17	2021-06-22
Mexico|ROO-INMEGEN-16-327|EPI_ISL_2978633|P.1.17|2021-06-22	Mexico	ROO	ROO-INMEGEN-16-327	EPI_ISL_2978633	P.1.17	2021-06-22
Mexico|TAB-InDRE_FB18499_S4357|EPI_ISL_2937819|P.1.17|2021-06-22	Mexico	TAB	TAB-InDRE_FB18499_S4357	EPI_ISL_2937819	P.1.17	2021-06-22
Mexico|TAB-InDRE_FB18334_S4043|EPI_ISL_2859057|P.1.17|2021-06-22	Mexico	TAB	TAB-InDRE_FB18334_S4043	EPI_ISL_2859057	P.1.17	2021-06-22
Mexico|TAB-InDRE_FB18403_S4348|EPI_ISL_2937810|P.1.17|2021-06-22	Mexico	TAB	TAB-InDRE_FB18403_S4348	EPI_ISL_2937810	P.1.17	2021-06-22
Mexico|YUC-InDRE_FB19009_S4701|EPI_ISL_3033526|P.1.17|2021-06-22	Mexico	YUC	YUC-InDRE_FB19009_S4701	EPI_ISL_3033526	P.1.17	2021-06-22
Mexico|YUC-Biomedicos-6220032|EPI_ISL_2928299|P.1.17|2021-06-22	Mexico	YUC	YUC-Biomedicos-6220032	EPI_ISL_2928299	P.1.17	2021-06-22
Mexico|YUC-InDRE_FB19000_S4694|EPI_ISL_3033520|P.1.17|2021-06-22	Mexico	YUC	YUC-InDRE_FB19000_S4694	EPI_ISL_3033520	P.1.17	2021-06-22
Mexico|YUC-LANGEBIO_IMSS_1202|EPI_ISL_2942363|P.1.17|2021-06-22	Mexico	YUC	YUC-LANGEBIO_IMSS_1202	EPI_ISL_2942363	P.1.17	2021-06-22
USA|CA-CDC-QDX26215575|EPI_ISL_2876903|P.1.17|2021-06-23	USA	CA-USAC	CA-CDC-QDX26215575	EPI_ISL_2876903	P.1.17	2021-06-23
Mexico|CAM-LANGEBIO_IMSS_1525|EPI_ISL_2942636|P.1.17|2021-06-23	Mexico	CAM	CAM-LANGEBIO_IMSS_1525	EPI_ISL_2942636	P.1.17	2021-06-23
Mexico|CAM-LANGEBIO_IMSS_1517|EPI_ISL_2942630|P.1.17|2021-06-23	Mexico	CAM	CAM-LANGEBIO_IMSS_1517	EPI_ISL_2942630	P.1.17	2021-06-23
Mexico|CMX-InDRE_FD77810_S4047|EPI_ISL_2859061|P.1.17|2021-06-23	Mexico	CAM	CMX-InDRE_FD77810_S4047	EPI_ISL_2859061	P.1.17	2021-06-23
USA|FL-CDC-QDX26177893|EPI_ISL_2876835|P.1.17|2021-06-23	USA	FL-USAC	FL-CDC-QDX26177893	EPI_ISL_2876835	P.1.17	2021-06-23
Mexico|MEX-INMEGEN-06-03-338|EPI_ISL_2810294|P.1.17|2021-06-23	Mexico	MEX	MEX-INMEGEN-06-03-338	EPI_ISL_2810294	P.1.17	2021-06-23
Mexico|ROO-INMEGEN-16-328|EPI_ISL_2978634|P.1.17|2021-06-23	Mexico	ROO	ROO-INMEGEN-16-328	EPI_ISL_2978634	P.1.17	2021-06-23
Mexico|ROO-INMEGEN-16-289|EPI_ISL_2978600|P.1.17|2021-06-23	Mexico	ROO	ROO-INMEGEN-16-289	EPI_ISL_2978600	P.1.17	2021-06-23
Mexico|ROO-InDRE_FB19166_S4750|EPI_ISL_3033573|P.1.17|2021-06-23	Mexico	ROO	ROO-InDRE_FB19166_S4750	EPI_ISL_3033573	P.1.17	2021-06-23
Mexico|ROO-LANGEBIO_IMSS_1526|EPI_ISL_2942637|P.1.17|2021-06-23	Mexico	ROO	ROO-LANGEBIO_IMSS_1526	EPI_ISL_2942637	P.1.17	2021-06-23
Mexico|ROO-INMEGEN-16-304|EPI_ISL_2978614|P.1.17|2021-06-23	Mexico	ROO	ROO-INMEGEN-16-304	EPI_ISL_2978614	P.1.17	2021-06-23
Mexico|ROO-INMEGEN-16-375|EPI_ISL_2978678|P.1.17|2021-06-23	Mexico	ROO	ROO-INMEGEN-16-375	EPI_ISL_2978678	P.1.17	2021-06-23
Mexico|ROO-LANGEBIO_IMSS_1531|EPI_ISL_2942642|P.1.17|2021-06-23	Mexico	ROO	ROO-LANGEBIO_IMSS_1531	EPI_ISL_2942642	P.1.17	2021-06-23
Mexico|ROO-INMEGEN-16-367|EPI_ISL_2978671|P.1.17|2021-06-23	Mexico	ROO	ROO-INMEGEN-16-367	EPI_ISL_2978671	P.1.17	2021-06-23
Mexico|ROO-INMEGEN-16-335|EPI_ISL_2978640|P.1.17|2021-06-23	Mexico	ROO	ROO-INMEGEN-16-335	EPI_ISL_2978640	P.1.17	2021-06-23
Mexico|TAB-InDRE_FB18386_S4344|EPI_ISL_2937806|P.1.17|2021-06-23	Mexico	TAB	TAB-InDRE_FB18386_S4344	EPI_ISL_2937806	P.1.17	2021-06-23
Mexico|TAB-InDRE_FB18396_S4346|EPI_ISL_2937808|P.1.17|2021-06-23	Mexico	TAB	TAB-InDRE_FB18396_S4346	EPI_ISL_2937808	P.1.17	2021-06-23
Mexico|TAM-INMEGEN-17-143|EPI_ISL_3067934|P.1.17|2021-06-23	Mexico	TAB	TAM-INMEGEN-17-143	EPI_ISL_3067934	P.1.17	2021-06-23
Mexico|VER-INMEGEN-16-311|EPI_ISL_2978620|P.1.17|2021-06-23	Mexico	VER	VER-INMEGEN-16-311	EPI_ISL_2978620	P.1.17	2021-06-23
Mexico|YUC-InDRE_FB19022_S4708|EPI_ISL_3033533|P.1.17|2021-06-23	Mexico	YUC	YUC-InDRE_FB19022_S4708	EPI_ISL_3033533	P.1.17	2021-06-23
Mexico|YUC-InDRE_FB19025_S4711|EPI_ISL_3033536|P.1.17|2021-06-23	Mexico	YUC	YUC-InDRE_FB19025_S4711	EPI_ISL_3033536	P.1.17	2021-06-23
Mexico|YUC-LANGEBIO_IMSS_1222|EPI_ISL_2942383|P.1.17|2021-06-23	Mexico	YUC	YUC-LANGEBIO_IMSS_1222	EPI_ISL_2942383	P.1.17	2021-06-23
Mexico|YUC-InDRE_FB18972_S4670|EPI_ISL_3033498|P.1.17|2021-06-23	Mexico	YUC	YUC-InDRE_FB18972_S4670	EPI_ISL_3033498	P.1.17	2021-06-23
Mexico|YUC-InDRE_FB19015_S4704|EPI_ISL_3033529|P.1.17|2021-06-23	Mexico	YUC	YUC-InDRE_FB19015_S4704	EPI_ISL_3033529	P.1.17	2021-06-23
Mexico|YUC-INMEGEN-16-297|EPI_ISL_2978608|P.1.17|2021-06-23	Mexico	YUC	YUC-INMEGEN-16-297	EPI_ISL_2978608	P.1.17	2021-06-23
USA|CA-CDPH-3000127891|EPI_ISL_4508811|P.1.17|2021-06-24	USA	CA-USAC	CA-CDPH-3000127891	EPI_ISL_4508811	P.1.17	2021-06-24
USA|CA-HLX-STM-0006305-G05|EPI_ISL_9540350|P.1.17|2021-06-24	USA	CA-USAH	CA-HLX-STM-0006305-G05	EPI_ISL_9540350	P.1.17	2021-06-24
Mexico|CAM-LANGEBIO_IMSS_1540|EPI_ISL_2942651|P.1.17|2021-06-24	Mexico	CAM	CAM-LANGEBIO_IMSS_1540	EPI_ISL_2942651	P.1.17	2021-06-24
Mexico|ROO-LANGEBIO_IMSS_1542|EPI_ISL_2942653|P.1.17|2021-06-24	Mexico	ROO	ROO-LANGEBIO_IMSS_1542	EPI_ISL_2942653	P.1.17	2021-06-24
Mexico|YUC-InDRE_FB19032_S4716|EPI_ISL_3033541|P.1.17|2021-06-24	Mexico	YUC	YUC-InDRE_FB19032_S4716	EPI_ISL_3033541	P.1.17	2021-06-24
Mexico|YUC-InDRE_FB19035_S4717|EPI_ISL_3033542|P.1.17|2021-06-24	Mexico	YUC	YUC-InDRE_FB19035_S4717	EPI_ISL_3033542	P.1.17	2021-06-24
USA|CA-CDC-FG-038818|EPI_ISL_2873443|P.1.17|2021-06-25	USA	CA-USAC	CA-CDC-FG-038818	EPI_ISL_2873443	P.1.17	2021-06-25
USA|CA-CDC-QDX26215653|EPI_ISL_2876913|P.1.17|2021-06-25	USA	CA-USAC	CA-CDC-QDX26215653	EPI_ISL_2876913	P.1.17	2021-06-25
USA|CA-HLX-STM-0006115-A08|EPI_ISL_9548006|P.1.17|2021-06-25	USA	CA-USAH	CA-HLX-STM-0006115-A08	EPI_ISL_9548006	P.1.17	2021-06-25
Belize|CML-123|EPI_ISL_4296427|P.1.17|2021-06-25	Belize	CML-USA	CML-123	EPI_ISL_4296427	P.1.17	2021-06-25
Mexico|GUA-InDRE_FB18483_S4767|EPI_ISL_3033589|P.1.17|2021-06-25	Mexico	GUA	GUA-InDRE_FB18483_S4767	EPI_ISL_3033589	P.1.17	2021-06-25
USA|KY-KSPHL-100914|EPI_ISL_4417734|P.1.17|2021-06-25	USA	KY-USAK	KY-KSPHL-100914	EPI_ISL_4417734	P.1.17	2021-06-25
Mexico|ROO-LANGEBIO_IMSS_1541|EPI_ISL_2942652|P.1.17|2021-06-25	Mexico	ROO	ROO-LANGEBIO_IMSS_1541	EPI_ISL_2942652	P.1.17	2021-06-25
Mexico|ROO-LANGEBIO_IMSS_1558|EPI_ISL_2942669|P.1.17|2021-06-25	Mexico	ROO	ROO-LANGEBIO_IMSS_1558	EPI_ISL_2942669	P.1.17	2021-06-25
Mexico|TAB-InDRE_FB19093_S4731|EPI_ISL_3033554|P.1.17|2021-06-25	Mexico	TAB	TAB-InDRE_FB19093_S4731	EPI_ISL_3033554	P.1.17	2021-06-25
Mexico|TAB-InDRE_FB19091_S4730|EPI_ISL_3033553|P.1.17|2021-06-25	Mexico	TAB	TAB-InDRE_FB19091_S4730	EPI_ISL_3033553	P.1.17	2021-06-25
Mexico|TAB-InDRE_FB19087_S4728|EPI_ISL_3033551|P.1.17|2021-06-25	Mexico	TAB	TAB-InDRE_FB19087_S4728	EPI_ISL_3033551	P.1.17	2021-06-25
Mexico|CAM-LANGEBIO_IMSS_1570|EPI_ISL_2942681|P.1.17|2021-06-26	Mexico	CAM	CAM-LANGEBIO_IMSS_1570	EPI_ISL_2942681	P.1.17	2021-06-26
Mexico|ROO-LANGEBIO_IMSS_1559|EPI_ISL_2942670|P.1.17|2021-06-26	Mexico	ROO	ROO-LANGEBIO_IMSS_1559	EPI_ISL_2942670	P.1.17	2021-06-26
Mexico|TAB-LANGEBIO_IMSS_1598|EPI_ISL_2942707|P.1.17|2021-06-26	Mexico	TAB	TAB-LANGEBIO_IMSS_1598	EPI_ISL_2942707	P.1.17	2021-06-26
Belize|CML-118|EPI_ISL_4296422|P.1.17|2021-06-27	Belize	CML-USA	CML-118	EPI_ISL_4296422	P.1.17	2021-06-27
Mexico|ROO-LANGEBIO_IMSS_1574|EPI_ISL_2942685|P.1.17|2021-06-27	Mexico	ROO	ROO-LANGEBIO_IMSS_1574	EPI_ISL_2942685	P.1.17	2021-06-27
Mexico|TAB-InDRE_FB19089_S4729|EPI_ISL_3033552|P.1.17|2021-06-27	Mexico	TAB	TAB-InDRE_FB19089_S4729	EPI_ISL_3033552	P.1.17	2021-06-27
USA|CA-CDC-FG-039027|EPI_ISL_2873587|P.1.17|2021-06-28	USA	CA-USAC	CA-CDC-FG-039027	EPI_ISL_2873587	P.1.17	2021-06-28
Mexico|CMX-INER-IBT-0373|EPI_ISL_3268375|P.1.17|2021-06-28	Mexico	CMX	CMX-INER-IBT-0373	EPI_ISL_3268375	P.1.17	2021-06-28
Mexico|ROO-LANGEBIO_IMSS_1575|EPI_ISL_2942686|P.1.17|2021-06-28	Mexico	ROO	ROO-LANGEBIO_IMSS_1575	EPI_ISL_2942686	P.1.17	2021-06-28
Mexico|ROO-LANGEBIO_IMSS_1592|EPI_ISL_2942702|P.1.17|2021-06-28	Mexico	ROO	ROO-LANGEBIO_IMSS_1592	EPI_ISL_2942702	P.1.17	2021-06-28
Mexico|TAB-InDRE_FB19060_S4721|EPI_ISL_3033546|P.1.17|2021-06-28	Mexico	TAB	TAB-InDRE_FB19060_S4721	EPI_ISL_3033546	P.1.17	2021-06-28
Mexico|TAB-InDRE_FB19066_S4723|EPI_ISL_3033548|P.1.17|2021-06-28	Mexico	TAB	TAB-InDRE_FB19066_S4723	EPI_ISL_3033548	P.1.17	2021-06-28
Mexico|TAB-InDRE_FB19073_S4725|EPI_ISL_3046104|P.1.17|2021-06-28	Mexico	TAB	TAB-InDRE_FB19073_S4725	EPI_ISL_3046104	P.1.17	2021-06-28
Mexico|TAB-InDRE_FB19301_S4758|EPI_ISL_3033581|P.1.17|2021-06-28	Mexico	TAB	TAB-InDRE_FB19301_S4758	EPI_ISL_3033581	P.1.17	2021-06-28
Mexico|TAB-InDRE_FB19052_S4720|EPI_ISL_3033545|P.1.17|2021-06-28	Mexico	TAB	TAB-InDRE_FB19052_S4720	EPI_ISL_3033545	P.1.17	2021-06-28
Mexico|TAB-LANGEBIO_IMSS_1597|EPI_ISL_2942706|P.1.17|2021-06-28	Mexico	TAB	TAB-LANGEBIO_IMSS_1597	EPI_ISL_2942706	P.1.17	2021-06-28
Belize|CML-100|EPI_ISL_4296404|P.1.17|2021-06-29	Belize	CML-USA	CML-100	EPI_ISL_4296404	P.1.17	2021-06-29
Mexico|PUE-LANGEBIO_IMSS_1854|EPI_ISL_2942921|P.1.17|2021-06-29	Mexico	PUE	PUE-LANGEBIO_IMSS_1854	EPI_ISL_2942921	P.1.17	2021-06-29
Mexico|TAB-InDRE_FB19316_S4765|EPI_ISL_3033587|P.1.17|2021-06-29	Mexico	TAB	TAB-InDRE_FB19316_S4765	EPI_ISL_3033587	P.1.17	2021-06-29
Mexico|TAB-InDRE_FB19302_S4759|EPI_ISL_3033582|P.1.17|2021-06-29	Mexico	TAB	TAB-InDRE_FB19302_S4759	EPI_ISL_3033582	P.1.17	2021-06-29
Mexico|TAB-InDRE_FB19310_S4763|EPI_ISL_3046106|P.1.17|2021-06-29	Mexico	TAB	TAB-InDRE_FB19310_S4763	EPI_ISL_3046106	P.1.17	2021-06-29
Mexico|TAB-InDRE_FB19307_S4761|EPI_ISL_3033584|P.1.17|2021-06-29	Mexico	TAB	TAB-InDRE_FB19307_S4761	EPI_ISL_3033584	P.1.17	2021-06-29
Mexico|TAB-InDRE_FB19321_S4766|EPI_ISL_3033588|P.1.17|2021-06-29	Mexico	TAB	TAB-InDRE_FB19321_S4766	EPI_ISL_3033588	P.1.17	2021-06-29
Mexico|YUC-LANGEBIO_IMSS_1569|EPI_ISL_2942680|P.1.17|2021-06-29	Mexico	YUC	YUC-LANGEBIO_IMSS_1569	EPI_ISL_2942680	P.1.17	2021-06-29
Mexico|YUC-LANGEBIO_IMSS_1567|EPI_ISL_2942678|P.1.17|2021-06-29	Mexico	YUC	YUC-LANGEBIO_IMSS_1567	EPI_ISL_2942678	P.1.17	2021-06-29
Belize|CML-107|EPI_ISL_4296411|P.1.17|2021-06-30	Belize	CML-USA	CML-107	EPI_ISL_4296411	P.1.17	2021-06-30
Belize|CML-106|EPI_ISL_4296410|P.1.17|2021-06-30	Belize	CML-USA	CML-106	EPI_ISL_4296410	P.1.17	2021-06-30
Mexico|PUE-LANGEBIO_IMSS_1856|EPI_ISL_2942923|P.1.17|2021-06-30	Mexico	PUE	PUE-LANGEBIO_IMSS_1856	EPI_ISL_2942923	P.1.17	2021-06-30
Mexico|YUC-LANGEBIO_IMSS_1605|EPI_ISL_2942714|P.1.17|2021-06-30	Mexico	YUC	YUC-LANGEBIO_IMSS_1605	EPI_ISL_2942714	P.1.17	2021-06-30
Mexico|ROO-InDRE_FB20121_S5100|EPI_ISL_3265595|P.1.17|2021-07-01	Mexico	ROO	ROO-InDRE_FB20121_S5100	EPI_ISL_3265595	P.1.17	2021-07-01
Mexico|ROO-InDRE_FB20122_S5101|EPI_ISL_3265596|P.1.17|2021-07-01	Mexico	ROO	ROO-InDRE_FB20122_S5101	EPI_ISL_3265596	P.1.17	2021-07-01
Mexico|TAB-InDRE_FB19642_S4777|EPI_ISL_3033599|P.1.17|2021-07-01	Mexico	TAB	TAB-InDRE_FB19642_S4777	EPI_ISL_3033599	P.1.17	2021-07-01
USA|CA-SDCPHL-80921010|EPI_ISL_3388861|P.1.17|2021-07-02	USA	CA-USAS	CA-SDCPHL-80921010	EPI_ISL_3388861	P.1.17	2021-07-02
USA|FL-CDC-ASC210155831|EPI_ISL_3220917|P.1.17|2021-07-02	USA	FL-USAC	FL-CDC-ASC210155831	EPI_ISL_3220917	P.1.17	2021-07-02
USA|MA-CDCBI-CRSP_YJCTZIXEKPGEIJE5|EPI_ISL_3007453|P.1.17|2021-07-02	USA	MA-USAC	MA-CDCBI-CRSP_YJCTZIXEKPGEIJE5	EPI_ISL_3007453	P.1.17	2021-07-02
Mexico|ROO-INER_IMSS_1344|EPI_ISL_3155355|P.1.17|2021-07-02	Mexico	ROO	ROO-INER_IMSS_1344	EPI_ISL_3155355	P.1.17	2021-07-02
Mexico|ROO-INER_IMSS_1351|EPI_ISL_3155362|P.1.17|2021-07-02	Mexico	ROO	ROO-INER_IMSS_1351	EPI_ISL_3155362	P.1.17	2021-07-02
Mexico|ROO-INER_IMSS_1353|EPI_ISL_3155364|P.1.17|2021-07-02	Mexico	ROO	ROO-INER_IMSS_1353	EPI_ISL_3155364	P.1.17	2021-07-02
Mexico|TAB-InDRE_FB19664_S4778|EPI_ISL_3033600|P.1.17|2021-07-02	Mexico	TAB	TAB-InDRE_FB19664_S4778	EPI_ISL_3033600	P.1.17	2021-07-02
USA|CA-CDC-QDX26532192|EPI_ISL_3303863|P.1.17|2021-07-03	USA	CA-USAC	CA-CDC-QDX26532192	EPI_ISL_3303863	P.1.17	2021-07-03
Mexico|MOR-INER_IMSS_1565|EPI_ISL_3155575|P.1.17|2021-07-04	Mexico	MOR	MOR-INER_IMSS_1565	EPI_ISL_3155575	P.1.17	2021-07-04
Mexico|TAB-INER_IMSS_1348|EPI_ISL_3155359|P.1.17|2021-07-04	Mexico	TAB	TAB-INER_IMSS_1348	EPI_ISL_3155359	P.1.17	2021-07-04
USA|TX-CDC-LC0104263|EPI_ISL_3330636|P.1.17|2021-07-04	USA	TX-USAC	TX-CDC-LC0104263	EPI_ISL_3330636	P.1.17	2021-07-04
USA|VA-DCLS-5812|EPI_ISL_3021034|P.1.17|2021-07-04	USA	VA-USAD	VA-DCLS-5812	EPI_ISL_3021034	P.1.17	2021-07-04
Mexico|CAM-INER_IMSS_1363|EPI_ISL_3155373|P.1.17|2021-07-05	Mexico	CAM	CAM-INER_IMSS_1363	EPI_ISL_3155373	P.1.17	2021-07-05
Mexico|CAM-INER_IMSS_1361|EPI_ISL_3155371|P.1.17|2021-07-05	Mexico	CAM	CAM-INER_IMSS_1361	EPI_ISL_3155371	P.1.17	2021-07-05
USA|FL-CDC-ASC210111467|EPI_ISL_3217643|P.1.17|2021-07-05	USA	FL-USAC	FL-CDC-ASC210111467	EPI_ISL_3217643	P.1.17	2021-07-05
USA|NJ-NYGC-V225-XMLY446|EPI_ISL_3696378|P.1.17|2021-07-05	USA	NJ-USAN	NJ-NYGC-V225-XMLY446	EPI_ISL_3696378	P.1.17	2021-07-05
USA|TX-CDC-QDX26573756|EPI_ISL_3303889|P.1.17|2021-07-05	USA	TX-USA	TX-CDC-QDX26573756	EPI_ISL_3303889	P.1.17	2021-07-05
Mexico|VER-INER_IMSS_1570|EPI_ISL_3155580|P.1.17|2021-07-05	Mexico	VER	VER-INER_IMSS_1570	EPI_ISL_3155580	P.1.17	2021-07-05
Mexico|CAM-InDRE_FB21564_S5122|EPI_ISL_3265612|P.1.17|2021-07-06	Mexico	CAM	CAM-InDRE_FB21564_S5122	EPI_ISL_3265612	P.1.17	2021-07-06
Mexico|SON-InDRE_FB21624_S5125|EPI_ISL_3265615|P.1.17|2021-07-06	Mexico	SON	SON-InDRE_FB21624_S5125	EPI_ISL_3265615	P.1.17	2021-07-06
Mexico|ROO-InDRE_FB21543_S5118|EPI_ISL_3265608|P.1.17|2021-07-07	Mexico	ROO	ROO-InDRE_FB21543_S5118	EPI_ISL_3265608	P.1.17	2021-07-07
Mexico|ROO-INMEGEN-22-8|EPI_ISL_3721852|P.1.17|2021-07-07	Mexico	ROO	ROO-INMEGEN-22-8	EPI_ISL_3721852	P.1.17	2021-07-07
USA|TX-CDC-QDX26633041|EPI_ISL_3303892|P.1.17|2021-07-07	USA	TX-USAC	TX-CDC-QDX26633041	EPI_ISL_3303892	P.1.17	2021-07-07
USA|WA-CDC-UW21070766014|EPI_ISL_3063726|P.1.17|2021-07-07	USA	WA-USAC	WA-CDC-UW21070766014	EPI_ISL_3063726	P.1.17	2021-07-07
USA|CA-OC-206|EPI_ISL_3063059|P.1.17|2021-07-08	USA	CA-USAO	CA-OC-206	EPI_ISL_3063059	P.1.17	2021-07-08
Mexico|ROO-INMEGEN-22-20|EPI_ISL_3721879|P.1.17|2021-07-08	Mexico	ROO	ROO-INMEGEN-22-20	EPI_ISL_3721879	P.1.17	2021-07-08
Mexico|ROO-INMEGEN-23-138|EPI_ISL_3905941|P.1.17|2021-07-08	Mexico	ROO	ROO-INMEGEN-23-138	EPI_ISL_3905941	P.1.17	2021-07-08
Mexico|ROO-INMEGEN-22-9|EPI_ISL_3721960|P.1.17|2021-07-08	Mexico	ROO	ROO-INMEGEN-22-9	EPI_ISL_3721960	P.1.17	2021-07-08
Mexico|ROO-INMEGEN-23-135|EPI_ISL_3905850|P.1.17|2021-07-08	Mexico	ROO	ROO-INMEGEN-23-135	EPI_ISL_3905850	P.1.17	2021-07-08
Mexico|ROO-INMEGEN-23-137|EPI_ISL_3905940|P.1.17|2021-07-08	Mexico	ROO	ROO-INMEGEN-23-137	EPI_ISL_3905940	P.1.17	2021-07-08
Mexico|ROO-INMEGEN-22-7|EPI_ISL_3721929|P.1.17|2021-07-08	Mexico	ROO	ROO-INMEGEN-22-7	EPI_ISL_3721929	P.1.17	2021-07-08
USA|FL-CDC-ASC210155959|EPI_ISL_3218139|P.1.17|2021-07-09	USA	FL-USAC	FL-CDC-ASC210155959	EPI_ISL_3218139	P.1.17	2021-07-09
Mexico|JAL-InDRE_FB21648_S5361|EPI_ISL_3459957|P.1.17|2021-07-09	Mexico	JAL	JAL-InDRE_FB21648_S5361	EPI_ISL_3459957	P.1.17	2021-07-09
Mexico|ROO_IBT_IMSS_2141|EPI_ISL_3347534|P.1.17|2021-07-09	Mexico	ROO	ROO_IBT_IMSS_2141	EPI_ISL_3347534	P.1.17	2021-07-09
Mexico|TAB-INMEGEN-23-160|EPI_ISL_3905846|P.1.17|2021-07-09	Mexico	TAB	TAB-INMEGEN-23-160	EPI_ISL_3905846	P.1.17	2021-07-09
USA|TX-CDC-ASC210112845|EPI_ISL_3219936|P.1.17|2021-07-09	USA	TX-USAC	TX-CDC-ASC210112845	EPI_ISL_3219936	P.1.17	2021-07-09
Mexico|VER-INMEGEN-22-31|EPI_ISL_3721810|P.1.17|2021-07-09	Mexico	VER	VER-INMEGEN-22-31	EPI_ISL_3721810	P.1.17	2021-07-09
Mexico|VER-INMEGEN-22-37|EPI_ISL_3721904|P.1.17|2021-07-09	Mexico	VER	VER-INMEGEN-22-37	EPI_ISL_3721904	P.1.17	2021-07-09
Mexico|TAB-INMEGEN-23-165|EPI_ISL_3905866|P.1.17|2021-07-10	Mexico	TAB	TAB-INMEGEN-23-165	EPI_ISL_3905866	P.1.17	2021-07-10
USA|NM-CDC-LC0102364|EPI_ISL_3326664|P.1.17|2021-07-11	USA	NM-USA	NM-CDC-LC0102364	EPI_ISL_3326664	P.1.17	2021-07-11
Mexico|ROO-INMEGEN-24-101|EPI_ISL_3943515|P.1.17|2021-07-11	Mexico	ROO	ROO-INMEGEN-24-101	EPI_ISL_3943515	P.1.17	2021-07-11
Mexico|TAB-InDRE_FB20845_S5339|EPI_ISL_3459949|P.1.17|2021-07-11	Mexico	TAB	TAB-InDRE_FB20845_S5339	EPI_ISL_3459949	P.1.17	2021-07-11
Mexico|YUC-INMEGEN-24-95|EPI_ISL_3943559|P.1.17|2021-07-11	Mexico	YUC	YUC-INMEGEN-24-95	EPI_ISL_3943559	P.1.17	2021-07-11
Mexico|CAM-InDRE_FB22649_S5507|EPI_ISL_3459960|P.1.17|2021-07-12	Mexico	CAM	CAM-InDRE_FB22649_S5507	EPI_ISL_3459960	P.1.17	2021-07-12
USA|NJ-CDC-LC0110765|EPI_ISL_3327535|P.1.17|2021-07-12	USA	NJ-USAC	NJ-CDC-LC0110765	EPI_ISL_3327535	P.1.17	2021-07-12
Mexico|ROO-INMEGEN-18-358|EPI_ISL_3160966|P.1.17|2021-07-12	Mexico	ROO	ROO-INMEGEN-18-358	EPI_ISL_3160966	P.1.17	2021-07-12
Mexico|TAB-InDRE_FB21330_S5343|EPI_ISL_3459952|P.1.17|2021-07-12	Mexico	TAB	TAB-InDRE_FB21330_S5343	EPI_ISL_3459952	P.1.17	2021-07-12
USA|TX-CDC-LC0126819|EPI_ISL_4159204|P.1.17|2021-07-12	USA	TX-USAC	TX-CDC-LC0126819	EPI_ISL_4159204	P.1.17	2021-07-12
Mexico|YUC_IBT_IMSS_2143|EPI_ISL_3347535|P.1.17|2021-07-12	Mexico	YUC	YUC_IBT_IMSS_2143	EPI_ISL_3347535	P.1.17	2021-07-12
Mexico|ROO-INMEGEN-18-71|EPI_ISL_3160701|P.1.17|2021-07-13	Mexico	ROO	ROO-INMEGEN-18-71	EPI_ISL_3160701	P.1.17	2021-07-13
USA|TX-CDC-LC0126151|EPI_ISL_4158960|P.1.17|2021-07-13	USA	TX-USA	TX-CDC-LC0126151	EPI_ISL_4158960	P.1.17	2021-07-13
USA|TX-CDC-ASC210114310|EPI_ISL_3323134|P.1.17|2021-07-13	USA	TX-USAC	TX-CDC-ASC210114310	EPI_ISL_3323134	P.1.17	2021-07-13
USA|CA-HLX-STM-0006222-B03|EPI_ISL_9544130|P.1.17|2021-07-14	USA	CA-USAH	CA-HLX-STM-0006222-B03	EPI_ISL_9544130	P.1.17	2021-07-14
Mexico|TAB_IBT_IMSS_2151|EPI_ISL_3347556|P.1.17|2021-07-14	Mexico	TAB	TAB_IBT_IMSS_2151	EPI_ISL_3347556	P.1.17	2021-07-14
Mexico|TAB-INMEGEN-18-86|EPI_ISL_3160716|P.1.17|2021-07-14	Mexico	TAB	TAB-INMEGEN-18-86	EPI_ISL_3160716	P.1.17	2021-07-14
USA|TX-CDC-LC0127655|EPI_ISL_4159844|P.1.17|2021-07-14	USA	TX-USA	TX-CDC-LC0127655	EPI_ISL_4159844	P.1.17	2021-07-14
USA|TX-HMH-MCoV-50152|EPI_ISL_5339542|P.1.17|2021-07-14	USA	TX-USAH	TX-HMH-MCoV-50152	EPI_ISL_5339542	P.1.17	2021-07-14
Mexico|YUC-INMEGEN-18-189|EPI_ISL_3160813|P.1.17|2021-07-14	Mexico	YUC	YUC-INMEGEN-18-189	EPI_ISL_3160813	P.1.17	2021-07-14
USA|FL-CDC-LC0099581|EPI_ISL_3329418|P.1.17|2021-07-15	USA	FL-USAC	FL-CDC-LC0099581	EPI_ISL_3329418	P.1.17	2021-07-15
USA|MO-CDC-LC0144244|EPI_ISL_3517530|P.1.17|2021-07-15	USA	MO-USAC	MO-CDC-LC0144244	EPI_ISL_3517530	P.1.17	2021-07-15
Mexico|ROO-INMEGEN-18-327|EPI_ISL_3160937|P.1.17|2021-07-15	Mexico	ROO	ROO-INMEGEN-18-327	EPI_ISL_3160937	P.1.17	2021-07-15
USA|KY-KSPHL-101129|EPI_ISL_5071361|P.1.17|2021-07-16	USA	KY-USAK	KY-KSPHL-101129	EPI_ISL_5071361	P.1.17	2021-07-16
USA|NY-PRL-2021_0719_00A19|EPI_ISL_3071881|P.1.17|2021-07-16	USA	NY-USA	NY-PRL-2021_0719_00A19	EPI_ISL_3071881	P.1.17	2021-07-16
Mexico|ROO-InDRE_FB23039_S5308|EPI_ISL_3459944|P.1.17|2021-07-16	Mexico	ROO	ROO-InDRE_FB23039_S5308	EPI_ISL_3459944	P.1.17	2021-07-16
Mexico|TAB_IBT_IMSS_2160|EPI_ISL_3347540|P.1.17|2021-07-16	Mexico	TAB	TAB_IBT_IMSS_2160	EPI_ISL_3347540	P.1.17	2021-07-16
Mexico|TAB-INMEGEN-18-194|EPI_ISL_3160818|P.1.17|2021-07-16	Mexico	TAB	TAB-INMEGEN-18-194	EPI_ISL_3160818	P.1.17	2021-07-16
Mexico|ROO_IBT_IMSS_2165|EPI_ISL_3347543|P.1.17|2021-07-17	Mexico	ROO	ROO_IBT_IMSS_2165	EPI_ISL_3347543	P.1.17	2021-07-17
USA|FL-CDC-STM-000709172|EPI_ISL_6479303|P.1.17|2021-07-18	USA	FL-USAC	FL-CDC-STM-000709172	EPI_ISL_6479303	P.1.17	2021-07-18
Mexico|TAB_IBT_IMSS_2167|EPI_ISL_3347544|P.1.17|2021-07-18	Mexico	TAB	TAB_IBT_IMSS_2167	EPI_ISL_3347544	P.1.17	2021-07-18
USA|CA-CDC-FG-044577|EPI_ISL_3210805|P.1.17|2021-07-19	USA	CA-USAC	CA-CDC-FG-044577	EPI_ISL_3210805	P.1.17	2021-07-19
Mexico|CAM-InDRE_FB25160_S5589|EPI_ISL_3769127|P.1.17|2021-07-19	Mexico	CAM	CAM-InDRE_FB25160_S5589	EPI_ISL_3769127	P.1.17	2021-07-19
Mexico|CAM-InDRE_FB25161_S5590|EPI_ISL_3769128|P.1.17|2021-07-19	Mexico	CAM	CAM-InDRE_FB25161_S5590	EPI_ISL_3769128	P.1.17	2021-07-19
Mexico|MOR_IBT_SSMor_4|EPI_ISL_3342656|P.1.17|2021-07-19	Mexico	MOR	MOR_IBT_SSMor_4	EPI_ISL_3342656	P.1.17	2021-07-19
Mexico|ROO-INMEGEN-19-122|EPI_ISL_3277650|P.1.17|2021-07-19	Mexico	ROO	ROO-INMEGEN-19-122	EPI_ISL_3277650	P.1.17	2021-07-19
Mexico|ROO-INMEGEN-19-130|EPI_ISL_3277658|P.1.17|2021-07-19	Mexico	ROO	ROO-INMEGEN-19-130	EPI_ISL_3277658	P.1.17	2021-07-19
Mexico|TAB-INMEGEN-19-126|EPI_ISL_3277654|P.1.17|2021-07-19	Mexico	TAB	TAB-INMEGEN-19-126	EPI_ISL_3277654	P.1.17	2021-07-19
Mexico|TAB-INMEGEN-19-166|EPI_ISL_3277689|P.1.17|2021-07-19	Mexico	TAB	TAB-INMEGEN-19-166	EPI_ISL_3277689	P.1.17	2021-07-19
USA|TX-CDC-ASC210161512|EPI_ISL_3813302|P.1.17|2021-07-19	USA	TX-USAC	TX-CDC-ASC210161512	EPI_ISL_3813302	P.1.17	2021-07-19
Mexico|YUC-InDRE_FB25237_S5599|EPI_ISL_3769132|P.1.17|2021-07-19	Mexico	YUC	YUC-InDRE_FB25237_S5599	EPI_ISL_3769132	P.1.17	2021-07-19
USA|CA-HLX-STM-0006191-F10|EPI_ISL_9543606|P.1.17|2021-07-20	USA	CA-USAH	CA-HLX-STM-0006191-F10	EPI_ISL_9543606	P.1.17	2021-07-20
Mexico|CAM-InDRE_FB25165_S5594|EPI_ISL_3769186|P.1.17|2021-07-20	Mexico	CAM	CAM-InDRE_FB25165_S5594	EPI_ISL_3769186	P.1.17	2021-07-20
Mexico|YUC-INMEGEN-19-179|EPI_ISL_3277700|P.1.17|2021-07-20	Mexico	YUC	YUC-INMEGEN-19-179	EPI_ISL_3277700	P.1.17	2021-07-20
Belize|8415105|EPI_ISL_5457210|P.1.17|2021-07-21	Belize	8415	8415105	EPI_ISL_5457210	P.1.17	2021-07-21
Belize|8415097|EPI_ISL_5457188|P.1.17|2021-07-21	Belize	8415	8415097	EPI_ISL_5457188	P.1.17	2021-07-21
Belize|8415096|EPI_ISL_5457170|P.1.17|2021-07-21	Belize	8415	8415096	EPI_ISL_5457170	P.1.17	2021-07-21
USA|HI-CDC-LC0169622|EPI_ISL_3686556|P.1.17|2021-07-21	USA	HI-USAC	HI-CDC-LC0169622	EPI_ISL_3686556	P.1.17	2021-07-21
Mexico|ROO-INMEGEN-19-167|EPI_ISL_3277690|P.1.17|2021-07-21	Mexico	ROO	ROO-INMEGEN-19-167	EPI_ISL_3277690	P.1.17	2021-07-21
Mexico|TAB-InDRE_FB23456_S5560|EPI_ISL_3769142|P.1.17|2021-07-21	Mexico	TAB	TAB-InDRE_FB23456_S5560	EPI_ISL_3769142	P.1.17	2021-07-21
Mexico|TAB-InDRE_FB23451_S5557|EPI_ISL_3769140|P.1.17|2021-07-21	Mexico	TAB	TAB-InDRE_FB23451_S5557	EPI_ISL_3769140	P.1.17	2021-07-21
Mexico|YUC_IBT_IMSS_2178|EPI_ISL_3347521|P.1.17|2021-07-21	Mexico	YUC	YUC_IBT_IMSS_2178	EPI_ISL_3347521	P.1.17	2021-07-21
Belize|8415447|EPI_ISL_5457254|P.1.17|2021-07-22	Belize	8415	8415447	EPI_ISL_5457254	P.1.17	2021-07-22
Belize|8415441|EPI_ISL_5457248|P.1.17|2021-07-22	Belize	8415	8415441	EPI_ISL_5457248	P.1.17	2021-07-22
USA|CA-CDPH-3000124112|EPI_ISL_4509106|P.1.17|2021-07-22	USA	CA-USA	CA-CDPH-3000124112	EPI_ISL_4509106	P.1.17	2021-07-22
Mexico|TAB-InDRE_FB23472_S5563|EPI_ISL_3769126|P.1.17|2021-07-22	Mexico	TAB	TAB-InDRE_FB23472_S5563	EPI_ISL_3769126	P.1.17	2021-07-22
Mexico|YUC-InDRE_FB25256_S5613|EPI_ISL_3769143|P.1.17|2021-07-22	Mexico	YUC	YUC-InDRE_FB25256_S5613	EPI_ISL_3769143	P.1.17	2021-07-22
Mexico|YUC-InDRE_FB25264_S5619|EPI_ISL_3769147|P.1.17|2021-07-22	Mexico	YUC	YUC-InDRE_FB25264_S5619	EPI_ISL_3769147	P.1.17	2021-07-22
Belize|8415626|EPI_ISL_5457349|P.1.17|2021-07-23	Belize	8415	8415626	EPI_ISL_5457349	P.1.17	2021-07-23
Belize|8415631|EPI_ISL_5457353|P.1.17|2021-07-23	Belize	8415	8415631	EPI_ISL_5457353	P.1.17	2021-07-23
Belize|8415623|EPI_ISL_5457340|P.1.17|2021-07-23	Belize	8415	8415623	EPI_ISL_5457340	P.1.17	2021-07-23
Mexico|CAM-CABANA-MX-UGA-IMSS_ITV_UBA_UCR_UdA_UPC-3427|EPI_ISL_7812870|P.1.17|2021-07-23	Mexico	CAM	CAM-CABANA-MX-UGA-IMSS_ITV_UBA_UCR_UdA_UPC-3427	EPI_ISL_7812870	P.1.17	2021-07-23
Mexico|VER-INMEGEN-19-133|EPI_ISL_3277660|P.1.17|2021-07-23	Mexico	VER	VER-INMEGEN-19-133	EPI_ISL_3277660	P.1.17	2021-07-23
USA|OR-OHSU-212280116|EPI_ISL_4102475|P.1.17|2021-07-24	USA	OR-USAO	OR-OHSU-212280116	EPI_ISL_4102475	P.1.17	2021-07-24
Mexico|ROO_INER_IMSS_1706|EPI_ISL_3556977|P.1.17|2021-07-24	Mexico	ROO	ROO_INER_IMSS_1706	EPI_ISL_3556977	P.1.17	2021-07-24
Mexico|TAB_INER_IMSS_1700|EPI_ISL_3556971|P.1.17|2021-07-24	Mexico	TAB	TAB_INER_IMSS_1700	EPI_ISL_3556971	P.1.17	2021-07-24
Mexico|TAB_INER_IMSS_1699|EPI_ISL_3556970|P.1.17|2021-07-24	Mexico	TAB	TAB_INER_IMSS_1699	EPI_ISL_3556970	P.1.17	2021-07-24
Mexico|TAB_INER_IMSS_1701|EPI_ISL_3556972|P.1.17|2021-07-24	Mexico	TAB	TAB_INER_IMSS_1701	EPI_ISL_3556972	P.1.17	2021-07-24
Mexico|VER_INER_IMSS_1787|EPI_ISL_3557058|P.1.17|2021-07-24	Mexico	VER	VER_INER_IMSS_1787	EPI_ISL_3557058	P.1.17	2021-07-24
USA|CA-CDC-ASC210245560|EPI_ISL_3816231|P.1.17|2021-07-25	USA	CA-USAC	CA-CDC-ASC210245560	EPI_ISL_3816231	P.1.17	2021-07-25
USA|CA-SC-254538|EPI_ISL_3547643|P.1.17|2021-07-25	USA	CA-USAS	CA-SC-254538	EPI_ISL_3547643	P.1.17	2021-07-25
Mexico|ROO-CABANA-MX-UGA-IMSS_ITV_UBA_UCR_UdA_UPC-3447|EPI_ISL_7813122|P.1.17|2021-07-25	Mexico	ROO	ROO-CABANA-MX-UGA-IMSS_ITV_UBA_UCR_UdA_UPC-3447	EPI_ISL_7813122	P.1.17	2021-07-25
Mexico|VER-INMEGEN-19-254|EPI_ISL_3277770|P.1.17|2021-07-25	Mexico	VER	VER-INMEGEN-19-254	EPI_ISL_3277770	P.1.17	2021-07-25
Mexico|YUC-InDRE_FB25296_S5644|EPI_ISL_3769157|P.1.17|2021-07-25	Mexico	YUC	YUC-InDRE_FB25296_S5644	EPI_ISL_3769157	P.1.17	2021-07-25
Belize|8416634|EPI_ISL_5457499|P.1.17|2021-07-26	Belize	8416	8416634	EPI_ISL_5457499	P.1.17	2021-07-26
USA|CA-CDC-FG-050525|EPI_ISL_3301977|P.1.17|2021-07-26	USA	CA-USAC	CA-CDC-FG-050525	EPI_ISL_3301977	P.1.17	2021-07-26
USA|IN-CDC-QDX27272320|EPI_ISL_3396560|P.1.17|2021-07-26	USA	IN-USA	IN-CDC-QDX27272320	EPI_ISL_3396560	P.1.17	2021-07-26
USA|KY-GD-080321-21072633796|EPI_ISL_3341309|P.1.17|2021-07-26	USA	KY-USAG	KY-GD-080321-21072633796	EPI_ISL_3341309	P.1.17	2021-07-26
Mexico|ROO_InDRE_FB28032_S6075|EPI_ISL_3923747|P.1.17|2021-07-26	Mexico	ROO	ROO_InDRE_FB28032_S6075	EPI_ISL_3923747	P.1.17	2021-07-26
Mexico|ROO_InDRE_FB28034_S6077|EPI_ISL_3923715|P.1.17|2021-07-26	Mexico	ROO	ROO_InDRE_FB28034_S6077	EPI_ISL_3923715	P.1.17	2021-07-26
Mexico|YUC-CABANA-MX-UGA-IMSS_ITV_UBA_UCR_UdA_UPC-3445|EPI_ISL_7813271|P.1.17|2021-07-27	Mexico	YUC	YUC-CABANA-MX-UGA-IMSS_ITV_UBA_UCR_UdA_UPC-3445	EPI_ISL_7813271	P.1.17	2021-07-27
USA|CA-CDPH-3000131316|EPI_ISL_8397024|P.1.17|2021-07-28	USA	CA-USAC	CA-CDPH-3000131316	EPI_ISL_8397024	P.1.17	2021-07-28
USA|FL-CDC-STM-000714211|EPI_ISL_6488209|P.1.17|2021-07-28	USA	FL-USAC	FL-CDC-STM-000714211	EPI_ISL_6488209	P.1.17	2021-07-28
USA|MO-CDC-ASC210231661|EPI_ISL_3843955|P.1.17|2021-07-28	USA	MO-USAC	MO-CDC-ASC210231661	EPI_ISL_3843955	P.1.17	2021-07-28
USA|MO-CDC-ASC210231664|EPI_ISL_3843961|P.1.17|2021-07-28	USA	MO-USAC	MO-CDC-ASC210231664	EPI_ISL_3843961	P.1.17	2021-07-28
Mexico|ROO_InDRE_FB28042_S6084|EPI_ISL_3923748|P.1.17|2021-07-28	Mexico	ROO	ROO_InDRE_FB28042_S6084	EPI_ISL_3923748	P.1.17	2021-07-28
Mexico|TAB-InDRE_FB26472_S5744|EPI_ISL_3769189|P.1.17|2021-07-28	Mexico	TAB	TAB-InDRE_FB26472_S5744	EPI_ISL_3769189	P.1.17	2021-07-28
USA|WA-UW-21072821122|EPI_ISL_4302568|P.1.17|2021-07-28	USA	WA-USAU	WA-UW-21072821122	EPI_ISL_4302568	P.1.17	2021-07-28
USA|CA-CDC-ASC210237006|EPI_ISL_3851111|P.1.17|2021-07-29	USA	CA-USAC	CA-CDC-ASC210237006	EPI_ISL_3851111	P.1.17	2021-07-29
USA|OR-OHSU-212360106|EPI_ISL_4636879|P.1.17|2021-07-29	USA	OR-USAO	OR-OHSU-212360106	EPI_ISL_4636879	P.1.17	2021-07-29
Mexico|VER-INMEGEN-20-312|EPI_ISL_3503632|P.1.17|2021-07-29	Mexico	VER	VER-INMEGEN-20-312	EPI_ISL_3503632	P.1.17	2021-07-29
Mexico|VER-INMEGEN-20-375|EPI_ISL_3503390|P.1.17|2021-07-29	Mexico	VER	VER-INMEGEN-20-375	EPI_ISL_3503390	P.1.17	2021-07-29
USA|FL-CDC-ASC210203296|EPI_ISL_3849429|P.1.17|2021-07-30	USA	FL-USAC	FL-CDC-ASC210203296	EPI_ISL_3849429	P.1.17	2021-07-30
Mexico|TAB_LANGEBIO_IMSS_1961|EPI_ISL_3805742|P.1.17|2021-07-30	Mexico	TAB	TAB_LANGEBIO_IMSS_1961	EPI_ISL_3805742	P.1.17	2021-07-30
Mexico|TAB-INMEGEN-20-250|EPI_ISL_3503421|P.1.17|2021-07-30	Mexico	TAB	TAB-INMEGEN-20-250	EPI_ISL_3503421	P.1.17	2021-07-30
Mexico|TAB-InDRE_FB26931_S5785|EPI_ISL_3769165|P.1.17|2021-07-30	Mexico	TAB	TAB-InDRE_FB26931_S5785	EPI_ISL_3769165	P.1.17	2021-07-30
USA|GA-CDC-MMB09535429|EPI_ISL_3603508|P.1.17|2021-07-31	USA	GA-USAC	GA-CDC-MMB09535429	EPI_ISL_3603508	P.1.17	2021-07-31
USA|MD-CDC-ASC210210623|EPI_ISL_3819755|P.1.17|2021-07-31	USA	MD-USAC	MD-CDC-ASC210210623	EPI_ISL_3819755	P.1.17	2021-07-31
Mexico|ROO_InDRE_FB30857_S6394|EPI_ISL_4199504|P.1.17|2021-07-31	Mexico	ROO	ROO_InDRE_FB30857_S6394	EPI_ISL_4199504	P.1.17	2021-07-31
Mexico|TAB_LANGEBIO_IMSS_1966|EPI_ISL_3805738|P.1.17|2021-07-31	Mexico	TAB	TAB_LANGEBIO_IMSS_1966	EPI_ISL_3805738	P.1.17	2021-07-31
Mexico|TAM-INMEGEN-20-272|EPI_ISL_3503388|P.1.17|2021-07-31	Mexico	TAB	TAM-INMEGEN-20-272	EPI_ISL_3503388	P.1.17	2021-07-31
USA|TX-DSHS-9051|EPI_ISL_4500737|P.1.17|2021-07-31	USA	TX-USAD	TX-DSHS-9051	EPI_ISL_4500737	P.1.17	2021-07-31
USA|TX-HMH-MCoV-52273|EPI_ISL_5341232|P.1.17|2021-07-31	USA	TX-USAH	TX-HMH-MCoV-52273	EPI_ISL_5341232	P.1.17	2021-07-31
Mexico|VER-INMEGEN-20-269|EPI_ISL_3503391|P.1.17|2021-07-31	Mexico	VER	VER-INMEGEN-20-269	EPI_ISL_3503391	P.1.17	2021-07-31
Mexico|ROO_LANGEBIO_IMSS_1984|EPI_ISL_3805741|P.1.17|2021-08-01	Mexico	ROO	ROO_LANGEBIO_IMSS_1984	EPI_ISL_3805741	P.1.17	2021-08-01
USA|CA-CDPH-3000137000|EPI_ISL_5013498|P.1.17|2021-08-02	USA	CA-USAC	CA-CDPH-3000137000	EPI_ISL_5013498	P.1.17	2021-08-02
USA|IL-NM-8794|EPI_ISL_4026199|P.1.17|2021-08-02	USA	IL-USAN	IL-NM-8794	EPI_ISL_4026199	P.1.17	2021-08-02
USA|MA-CDCBI-CRSP_EUH5CR4C6SL2A2MN|EPI_ISL_3407758|P.1.17|2021-08-02	USA	MA-USAC	MA-CDCBI-CRSP_EUH5CR4C6SL2A2MN	EPI_ISL_3407758	P.1.17	2021-08-02
Mexico|ROO_LANGEBIO_IMSS_1992|EPI_ISL_3805740|P.1.17|2021-08-02	Mexico	ROO	ROO_LANGEBIO_IMSS_1992	EPI_ISL_3805740	P.1.17	2021-08-02
Mexico|YUC-Biomedicos-8020096|EPI_ISL_3980440|P.1|2021-08-02	Mexico	YUC	YUC-Biomedicos-8020096	EPI_ISL_3980440	P.1	2021-08-02
Mexico|YUC-CABANA-MX-UGA-IMSS_ITV_UBA_UCR_UdA_UPC-3454|EPI_ISL_7813274|P.1.17|2021-08-02	Mexico	YUC	YUC-CABANA-MX-UGA-IMSS_ITV_UBA_UCR_UdA_UPC-3454	EPI_ISL_7813274	P.1.17	2021-08-02
USA|UT-UPHL-210820514188|EPI_ISL_3833464|P.1.17|2021-08-03	USA	UT-USAU	UT-UPHL-210820514188	EPI_ISL_3833464	P.1.17	2021-08-03
Mexico|YUC-INMEGEN-21-230|EPI_ISL_3548232|P.1.17|2021-08-03	Mexico	YUC	YUC-INMEGEN-21-230	EPI_ISL_3548232	P.1.17	2021-08-03
USA|CA-CDPH-3000139779|EPI_ISL_5013685|P.1.17|2021-08-04	USA	CA-USAC	CA-CDPH-3000139779	EPI_ISL_5013685	P.1.17	2021-08-04
Belize|CML-141|EPI_ISL_5887229|P.1.17|2021-08-04	Belize	CML-USA	CML-141	EPI_ISL_5887229	P.1.17	2021-08-04
USA|IL-NM-8844|EPI_ISL_4026102|P.1.17|2021-08-04	USA	IL-USAN	IL-NM-8844	EPI_ISL_4026102	P.1.17	2021-08-04
Mexico|ROO-INMEGEN-21-244|EPI_ISL_3548246|P.1.17|2021-08-04	Mexico	ROO	ROO-INMEGEN-21-244	EPI_ISL_3548246	P.1.17	2021-08-04
Mexico|TAB_InDRE_FB28620_S5990|EPI_ISL_3923745|P.1.17|2021-08-04	Mexico	TAB	TAB_InDRE_FB28620_S5990	EPI_ISL_3923745	P.1.17	2021-08-04
Belize|CML-158|EPI_ISL_5887245|P.1.17|2021-08-05	Belize	CML-USA	CML-158	EPI_ISL_5887245	P.1.17	2021-08-05
USA|CA-CDPH-3000150015|EPI_ISL_5153543|P.1.17|2021-08-07	USA	CA-USAC	CA-CDPH-3000150015	EPI_ISL_5153543	P.1.17	2021-08-07
Mexico|TAB-INMEGEN-22-364|EPI_ISL_3721738|P.1.17|2021-08-07	Mexico	TAB	TAB-INMEGEN-22-364	EPI_ISL_3721738	P.1.17	2021-08-07
USA|CA-CDPH-3000149660|EPI_ISL_5150007|P.1.17|2021-08-09	USA	CA-USAC	CA-CDPH-3000149660	EPI_ISL_5150007	P.1.17	2021-08-09
Mexico|CAM_IBT_IMSS_2627|EPI_ISL_4006347|P.1.17|2021-08-09	Mexico	CAM	CAM_IBT_IMSS_2627	EPI_ISL_4006347	P.1.17	2021-08-09
Belize|CML-176|EPI_ISL_5887263|P.1.17|2021-08-09	Belize	CML-USA	CML-176	EPI_ISL_5887263	P.1.17	2021-08-09
Mexico|YUC-INMEGEN-22-304|EPI_ISL_3721841|P.1|2021-08-09	Mexico	YUC	YUC-INMEGEN-22-304	EPI_ISL_3721841	P.1	2021-08-09
USA|CA-CDPH-3000148325|EPI_ISL_5153544|P.1.17|2021-08-10	USA	CA-USAC	CA-CDPH-3000148325	EPI_ISL_5153544	P.1.17	2021-08-10
USA|OR-OSPHL02562|EPI_ISL_3941448|P.1.17|2021-08-10	USA	OR-USAO	OR-OSPHL02562	EPI_ISL_3941448	P.1.17	2021-08-10
Mexico|ROO-INMEGEN-22-320|EPI_ISL_3721735|P.1.17|2021-08-10	Mexico	ROO	ROO-INMEGEN-22-320	EPI_ISL_3721735	P.1.17	2021-08-10
USA|DE-B1115736|EPI_ISL_4556916|P.1.17|2021-08-11	USA	DE-USAB	DE-B1115736	EPI_ISL_4556916	P.1.17	2021-08-11
Mexico|TAB_INER_IMSS_2003|EPI_ISL_4299426|P.1.17|2021-08-11	Mexico	TAB	TAB_INER_IMSS_2003	EPI_ISL_4299426	P.1.17	2021-08-11
Mexico|TAB_IBT_IMSS_2618|EPI_ISL_4006338|P.1.17|2021-08-12	Mexico	TAB	TAB_IBT_IMSS_2618	EPI_ISL_4006338	P.1.17	2021-08-12
Mexico|YUC_IBT_IMSS_2611|EPI_ISL_4006331|P.1|2021-08-12	Mexico	YUC	YUC_IBT_IMSS_2611	EPI_ISL_4006331	P.1	2021-08-12
Mexico|BCS-INMEGEN-22-104|EPI_ISL_3721840|P.1.17|2021-08-17	Mexico	BCS	BCS-INMEGEN-22-104	EPI_ISL_3721840	P.1.17	2021-08-17
Mexico|CAM-InDRE-FB34226-S6811|EPI_ISL_4298909|P.1.17|2021-08-17	Mexico	CAM	CAM-InDRE-FB34226-S6811	EPI_ISL_4298909	P.1.17	2021-08-17
Mexico|ROO-InDRE-FB34617-S6931|EPI_ISL_4299029|P.1.17|2021-08-17	Mexico	ROO	ROO-InDRE-FB34617-S6931	EPI_ISL_4299029	P.1.17	2021-08-17
Mexico|TAB_InDRE_FB32805_S6950|EPI_ISL_4602908|P.1.17|2021-08-17	Mexico	TAB	TAB_InDRE_FB32805_S6950	EPI_ISL_4602908	P.1.17	2021-08-17
Mexico|ROO-InDRE-FB34620-S6934|EPI_ISL_4299032|P.1.17|2021-08-21	Mexico	ROO	ROO-InDRE-FB34620-S6934	EPI_ISL_4299032	P.1.17	2021-08-21
USA|FL-BPHL-8059|EPI_ISL_4847522|P.1.17|2021-08-23	USA	FL-USAB	FL-BPHL-8059	EPI_ISL_4847522	P.1.17	2021-08-23
USA|OR-OHSU-212880466|EPI_ISL_5714702|P.1.17|2021-08-23	USA	OR-USAO	OR-OHSU-212880466	EPI_ISL_5714702	P.1.17	2021-08-23
USA|FL-BPHL-8804|EPI_ISL_5176380|P.1.17|2021-08-24	USA	FL-USAB	FL-BPHL-8804	EPI_ISL_5176380	P.1.17	2021-08-24
Mexico|VER-INMEGEN-25-187|EPI_ISL_4025246|P.1.17|2021-08-27	Mexico	VER	VER-INMEGEN-25-187	EPI_ISL_4025246	P.1.17	2021-08-27
Mexico|CAM_LANGEBIO_IMSS_2315|EPI_ISL_4549857|P.1.17|2021-08-30	Mexico	CAM	CAM_LANGEBIO_IMSS_2315	EPI_ISL_4549857	P.1.17	2021-08-30
USA|FL-CDC-ASC210125604|EPI_ISL_4381132|P.1.17|2021-08-31	USA	FL-USAC	FL-CDC-ASC210125604	EPI_ISL_4381132	P.1.17	2021-08-31
Mexico|CMX-INMEGEN-27-229|EPI_ISL_4232554|P.1.17|2021-09-06	Mexico	CAM	CMX-INMEGEN-27-229	EPI_ISL_4232554	P.1.17	2021-09-06
USA|FL-CDC-ASC210140452|EPI_ISL_5002273|P.1.17|2021-09-09	USA	FL-USAC	FL-CDC-ASC210140452	EPI_ISL_5002273	P.1.17	2021-09-09
USA|FL-CDC-ASC210140451|EPI_ISL_5002275|P.1.17|2021-09-09	USA	FL-USAC	FL-CDC-ASC210140451	EPI_ISL_5002275	P.1.17	2021-09-09
Mexico|CMX-INMEGEN-28-320|EPI_ISL_4512932|P.1.17|2021-09-15	Mexico	CAM	CMX-INMEGEN-28-320	EPI_ISL_4512932	P.1.17	2021-09-15
USA|CA-CDPH1919|EPI_ISL_4474680|P.1.17|2021-09-17	USA	CA-USAC	CA-CDPH1919	EPI_ISL_4474680	P.1.17	2021-09-17

## Sheet: B_1_617_2_C1d
Name	Location	State	ID	GISAID	Sublineage	Date
Mexico|ROO|ROO-InDRE_FB16368_S2369|EPI_ISL_2443049|AY.26|Delta_sub|2021-05-17	Mexico	ROO	ROO-InDRE_FB16368_S2369	EPI_ISL_2443049	AY.26	2021-05-17
Mexico|ROO|ROO-InDRE_FB16797_S2731|EPI_ISL_2533820|AY.26|Delta_sub|2021-05-23	Mexico	ROO	ROO-InDRE_FB16797_S2731	EPI_ISL_2533820	AY.26	2021-05-23
Mexico|BCS|BCS_IBT_IMSS_1573|EPI_ISL_2681214|AY.26|Delta_sub|2021-05-25	Mexico	BCS	BCS_IBT_IMSS_1573	EPI_ISL_2681214	AY.26	2021-05-25
Mexico|BCS|BCS_IBT_IMSS_1583|EPI_ISL_2681188|AY.26|Delta_sub|2021-05-27	Mexico	BCS	BCS_IBT_IMSS_1583	EPI_ISL_2681188	AY.26	2021-05-27
Mexico|CMX|CMX-INMEGEN-05-06-225|EPI_ISL_2603708|AY.26|Delta_sub|2021-05-28	Mexico	CMX	CMX-INMEGEN-05-06-225	EPI_ISL_2603708	AY.26	2021-05-28
Mexico|BCS|BCS-IBT_IMSS_1967|EPI_ISL_2801826|AY.26|Delta_sub|2021-06-02	Mexico	BCS	BCS-IBT_IMSS_1967	EPI_ISL_2801826	AY.26	2021-06-02
Mexico|BCS|BCS-IBT_IMSS_1960|EPI_ISL_2801819|AY.26|Delta_sub|2021-06-02	Mexico	BCS	BCS-IBT_IMSS_1960	EPI_ISL_2801819	AY.26	2021-06-02
Mexico|BCS|BCS-LANGEBIO_IMSS_1460|EPI_ISL_2942579|AY.26|Delta_sub|2021-06-04	Mexico	BCS	BCS-LANGEBIO_IMSS_1460	EPI_ISL_2942579	AY.26	2021-06-04
Mexico|SIN|SIN-InDRE_FB17476_S3410|EPI_ISL_2736781|AY.26|Delta_sub|2021-06-07	Mexico	SIN	SIN-InDRE_FB17476_S3410	EPI_ISL_2736781	AY.26	2021-06-07
Mexico|VER|VER-InDRE_FB17435_S3782|EPI_ISL_2835007|AY.26|Delta_sub|2021-06-08	Mexico	VER	VER-InDRE_FB17435_S3782	EPI_ISL_2835007	AY.26	2021-06-08
Mexico|YUC|YUC-INMEGEN-06-02-117|EPI_ISL_2692642|AY.26|Delta_sub|2021-06-08	Mexico	YUC	YUC-INMEGEN-06-02-117	EPI_ISL_2692642	AY.26	2021-06-08
Mexico|BCS|BCS-LANGEBIO_IMSS_1502|EPI_ISL_2942614|AY.26|Delta_sub|2021-06-09	Mexico	BCS	BCS-LANGEBIO_IMSS_1502	EPI_ISL_2942614	AY.26	2021-06-09
Mexico|BCS|BCS-InDRE_FB17733_S4370|EPI_ISL_2937836|AY.26|Delta_sub|2021-06-10	Mexico	BCS	BCS-InDRE_FB17733_S4370	EPI_ISL_2937836	AY.26	2021-06-10
Mexico|CAM|CAM-InDRE_FB18287_S3799|EPI_ISL_2835024|AY.26|Delta_sub|2021-06-14	Mexico	CAM	CAM-InDRE_FB18287_S3799	EPI_ISL_2835024	AY.26	2021-06-14
Mexico|QUE|QUE-InDRE_FB17978_S3789|EPI_ISL_2835014|AY.26|Delta_sub|2021-06-16	Mexico	QUE	QUE-InDRE_FB17978_S3789	EPI_ISL_2835014	AY.26	2021-06-16
Mexico|BCN|BCN-InDRE_FB18285_S3798|EPI_ISL_2835023|AY.26|Delta_sub|2021-06-17	Mexico	BCN	BCN-InDRE_FB18285_S3798	EPI_ISL_2835023	AY.26	2021-06-17
Mexico|BCS|BCS-LANGEBIO_IMSS_1725|EPI_ISL_2942809|AY.26|Delta_sub|2021-06-17	Mexico	BCS	BCS-LANGEBIO_IMSS_1725	EPI_ISL_2942809	AY.26	2021-06-17
Mexico|BCS|BCS-InDRE_FB18234_S4381|EPI_ISL_2937847|AY.26|Delta_sub|2021-06-19	Mexico	BCS	BCS-InDRE_FB18234_S4381	EPI_ISL_2937847	AY.26	2021-06-19
Mexico|ROO|ROO-LANGEBIO_IMSS_1235|EPI_ISL_2942396|AY.26|Delta_sub|2021-06-21	Mexico	ROO	ROO-LANGEBIO_IMSS_1235	EPI_ISL_2942396	AY.26	2021-06-21
Mexico|SIN|SIN-LANGEBIO_IMSS_1301|EPI_ISL_2942452|AY.26|Delta_sub|2021-06-22	Mexico	SIN	SIN-LANGEBIO_IMSS_1301	EPI_ISL_2942452	AY.26	2021-06-22
Mexico|AGU|AGU-InDRE_FB18229_S3797|EPI_ISL_2835022|AY.26|Delta_sub|2021-06-23	Mexico	AGU	AGU-InDRE_FB18229_S3797	EPI_ISL_2835022	AY.26	2021-06-23
Mexico|CMX|CMX-InDRE_FD77663_S3803|EPI_ISL_2861158|AY.26|Delta_sub|2021-06-23	Mexico	CMX	CMX-InDRE_FD77663_S3803	EPI_ISL_2861158	AY.26	2021-06-23
Mexico|CMX|CMX-INMEGEN-06-03-286|EPI_ISL_2810248|AY.26|Delta_sub|2021-06-23	Mexico	CMX	CMX-INMEGEN-06-03-286	EPI_ISL_2810248	AY.26	2021-06-23
Mexico|MEX|MEX-INMEGEN-06-03-287|EPI_ISL_2810249|AY.26|Delta_sub|2021-06-23	Mexico	MEX	MEX-INMEGEN-06-03-287	EPI_ISL_2810249	AY.26	2021-06-23
Mexico|SON|SON-LANGEBIO_IMSS_1308|EPI_ISL_2942456|AY.26|Delta_sub|2021-06-23	Mexico	SON	SON-LANGEBIO_IMSS_1308	EPI_ISL_2942456	AY.26	2021-06-23
Mexico|VER|VER-INMEGEN-17-152|EPI_ISL_3067952|AY.26|Delta_sub|2021-06-23	Mexico	VER	VER-INMEGEN-17-152	EPI_ISL_3067952	AY.26	2021-06-23
Mexico|CMX|CMX-INMEGEN-06-03-84|EPI_ISL_2810090|AY.26|Delta_sub|2021-06-24	Mexico	CMX	CMX-INMEGEN-06-03-84	EPI_ISL_2810090	AY.26	2021-06-24
Mexico|SIN|SIN-INMEGEN-18-213|EPI_ISL_3160836|AY.26|Delta_sub|2021-06-29	Mexico	SIN	SIN-INMEGEN-18-213	EPI_ISL_3160836	AY.26	2021-06-29
Mexico|SIN|SIN-INMEGEN-18-227|EPI_ISL_3160850|AY.26|Delta_sub|2021-06-29	Mexico	SIN	SIN-INMEGEN-18-227	EPI_ISL_3160850	AY.26	2021-06-29
Mexico|SIN|SIN-InDRE_FB19763_S4917|EPI_ISL_3265413|AY.26|Delta_sub|2021-07-02	Mexico	SIN	SIN-InDRE_FB19763_S4917	EPI_ISL_3265413	AY.26	2021-07-02
Mexico|JAL|JAL-LANGEBIO_IMSS_1642|EPI_ISL_2942743|AY.26|Delta_sub|2021-07-04	Mexico	JAL	JAL-LANGEBIO_IMSS_1642	EPI_ISL_2942743	AY.26	2021-07-04
Mexico|VER|VER-InDRE_FB20958_S4993|EPI_ISL_3265489|AY.26|Delta_sub|2021-07-05	Mexico	VER	VER-InDRE_FB20958_S4993	EPI_ISL_3265489	AY.26	2021-07-05
Mexico|AGU|AGU-InDRE_FB20858_S4984|EPI_ISL_3265480|AY.26|Delta_sub|2021-07-06	Mexico	AGU	AGU-InDRE_FB20858_S4984	EPI_ISL_3265480	AY.26	2021-07-06
Mexico|VER|VER-InDRE_FB20961_S4995|EPI_ISL_3265491|AY.26|Delta_sub|2021-07-06	Mexico	VER	VER-InDRE_FB20961_S4995	EPI_ISL_3265491	AY.26	2021-07-06
Mexico|GRO|GRO-INER_IMSS_1618|EPI_ISL_3155628|AY.26|Delta_sub|2021-07-07	Mexico	GRO	GRO-INER_IMSS_1618	EPI_ISL_3155628	AY.26	2021-07-07
Mexico|SIN|SIN-InDRE_FB20692_S4983|EPI_ISL_3265479|AY.26|Delta_sub|2021-07-07	Mexico	SIN	SIN-InDRE_FB20692_S4983	EPI_ISL_3265479	AY.26	2021-07-07
Mexico|ROO|ROO-INMEGEN-23-131|EPI_ISL_3905977|AY.26|Delta_sub|2021-07-08	Mexico	ROO	ROO-INMEGEN-23-131	EPI_ISL_3905977	AY.26	2021-07-08
Mexico|BCS|BCS-InDRE_FB21423_S5026|EPI_ISL_3265522|AY.26|Delta_sub|2021-07-09	Mexico	BCS	BCS-InDRE_FB21423_S5026	EPI_ISL_3265522	AY.26	2021-07-09
Mexico|VER|VER-InDRE_FB20991_S5004|EPI_ISL_3265500|AY.26|Delta_sub|2021-07-09	Mexico	VER	VER-InDRE_FB20991_S5004	EPI_ISL_3265500	AY.26	2021-07-09
Mexico|VER|VER-InDRE_FB20969_S4997|EPI_ISL_3265493|AY.26|Delta_sub|2021-07-09	Mexico	VER	VER-InDRE_FB20969_S4997	EPI_ISL_3265493	AY.26	2021-07-09
Mexico|AGU|AGU-InDRE_FB20905_S4988|EPI_ISL_3265484|AY.26|Delta_sub|2021-07-11	Mexico	AGU	AGU-InDRE_FB20905_S4988	EPI_ISL_3265484	AY.26	2021-07-11
Mexico|COL|COL-InDRE_FB21469_S5038|EPI_ISL_3265534|AY.26|Delta_sub|2021-07-11	Mexico	COL	COL-InDRE_FB21469_S5038	EPI_ISL_3265534	AY.26	2021-07-11
Mexico|JAL|JAL-InDRE_FB21654_S5204|EPI_ISL_3460029|AY.26|Delta_sub|2021-07-11	Mexico	JAL	JAL-InDRE_FB21654_S5204	EPI_ISL_3460029	AY.26	2021-07-11
Mexico|BCS|BCS-InDRE_FB23106_S5531|EPI_ISL_3460231|AY.26|Delta_sub|2021-07-12	Mexico	BCS	BCS-InDRE_FB23106_S5531	EPI_ISL_3460231	AY.26	2021-07-12
Mexico|JAL|JAL-InDRE_FB20715_S5334|EPI_ISL_3460118|AY.26|Delta_sub|2021-07-12	Mexico	JAL	JAL-InDRE_FB20715_S5334	EPI_ISL_3460118	AY.26	2021-07-12
Mexico|QUE|QUE-InDRE_FB21741_S5215|EPI_ISL_3460038|AY.26|Delta_sub|2021-07-12	Mexico	QUE	QUE-InDRE_FB21741_S5215	EPI_ISL_3460038	AY.26	2021-07-12
Mexico|SON|SON_IBT_IMSS_2287|EPI_ISL_3347892|AY.26|Delta_sub|2021-07-12	Mexico	SON	SON_IBT_IMSS_2287	EPI_ISL_3347892	AY.26	2021-07-12
Mexico|ROO|ROO-InDRE_FB23044_S5311|EPI_ISL_3460105|AY.26|Delta_sub|2021-07-13	Mexico	ROO	ROO-InDRE_FB23044_S5311	EPI_ISL_3460105	AY.26	2021-07-13
Mexico|JAL|JAL_IBT_IMSS_2204|EPI_ISL_3347607|AY.26|Delta_sub|2021-07-15	Mexico	JAL	JAL_IBT_IMSS_2204	EPI_ISL_3347607	AY.26	2021-07-15
Mexico|ROO|ROO_IBT_IMSS_2159|EPI_ISL_3347681|AY.26|Delta_sub|2021-07-15	Mexico	ROO	ROO_IBT_IMSS_2159	EPI_ISL_3347681	AY.26	2021-07-15
Mexico|CMX|CMX-INMEGEN-18-250|EPI_ISL_3160873|AY.26|Delta_sub|2021-07-17	Mexico	CMX	CMX-INMEGEN-18-250	EPI_ISL_3160873	AY.26	2021-07-17
Mexico|CMX|CMX-HIMFG-5795|EPI_ISL_5649190|AY.26|Delta_sub|2021-07-17	Mexico	CMX	CMX-HIMFG-5795	EPI_ISL_5649190	AY.26	2021-07-17
Mexico|SIN|SIN_IBT_IMSS_2238|EPI_ISL_3347854|AY.26|Delta_sub|2021-07-18	Mexico	SIN	SIN_IBT_IMSS_2238	EPI_ISL_3347854	AY.26	2021-07-18
Mexico|CMX|CMX-InDRE_FB23401_S5367|EPI_ISL_3460125|AY.26|Delta_sub|2021-07-19	Mexico	CMX	CMX-InDRE_FB23401_S5367	EPI_ISL_3460125	AY.26	2021-07-19
Mexico|ROO|ROO-INMEGEN-19-185|EPI_ISL_3277705|AY.26|Delta_sub|2021-07-19	Mexico	ROO	ROO-INMEGEN-19-185	EPI_ISL_3277705	AY.26	2021-07-19
Mexico|ROO|ROO-INMEGEN-19-109|EPI_ISL_3277637|AY.26|Delta_sub|2021-07-19	Mexico	ROO	ROO-INMEGEN-19-109	EPI_ISL_3277637	AY.26	2021-07-19
Mexico|JAL|JAL-InDRE_FB23227_S5422|EPI_ISL_3459970|AY.26|Delta_sub|2021-07-20	Mexico	JAL	JAL-InDRE_FB23227_S5422	EPI_ISL_3459970	AY.26	2021-07-20
Mexico|VER|VER-INMEGEN-19-116|EPI_ISL_3277644|AY.26|Delta_sub|2021-07-20	Mexico	VER	VER-INMEGEN-19-116	EPI_ISL_3277644	AY.26	2021-07-20
Mexico|BCS|BCS_IBT_IMSS_2946|EPI_ISL_4006465|AY.26|Delta_sub|2021-07-22	Mexico	BCS	BCS_IBT_IMSS_2946	EPI_ISL_4006465	AY.26	2021-07-22
Mexico|ROO|ROO_InDRE_FB28036_S6079|EPI_ISL_3923935|AY.26|Delta_sub|2021-07-22	Mexico	ROO	ROO_InDRE_FB28036_S6079	EPI_ISL_3923935	AY.26	2021-07-22
Mexico|QUE|QUE-InDRE_FB23906_S5435|EPI_ISL_3460161|AY.26|Delta_sub|2021-07-23	Mexico	QUE	QUE-InDRE_FB23906_S5435	EPI_ISL_3460161	AY.26	2021-07-23
Mexico|VER|VER-INMEGEN-19-277|EPI_ISL_3277793|AY.26|Delta_sub|2021-07-23	Mexico	VER	VER-INMEGEN-19-277	EPI_ISL_3277793	AY.26	2021-07-23
Mexico|VER|VER-INMEGEN-19-255|EPI_ISL_3277771|AY.26|Delta_sub|2021-07-25	Mexico	VER	VER-INMEGEN-19-255	EPI_ISL_3277771	AY.26	2021-07-25
Mexico|ZAC|ZAC_INER_IMSS_1972|EPI_ISL_3557244|AY.26|Delta_sub|2021-07-25	Mexico	ZAC	ZAC_INER_IMSS_1972	EPI_ISL_3557244	AY.26	2021-07-25
Mexico|VER|VER_InDRE_FB28153_S6135|EPI_ISL_3923982|AY.26|Delta_sub|2021-07-26	Mexico	VER	VER_InDRE_FB28153_S6135	EPI_ISL_3923982	AY.26	2021-07-26
Mexico|YUC|YUC-INMEGEN-20-283|EPI_ISL_3503701|AY.26|Delta_sub|2021-07-26	Mexico	YUC	YUC-INMEGEN-20-283	EPI_ISL_3503701	AY.26	2021-07-26
Mexico|BCS|BCS_InDRE_FB27951_S6074|EPI_ISL_3923932|AY.26|Delta_sub|2021-07-27	Mexico	BCS	BCS_InDRE_FB27951_S6074	EPI_ISL_3923932	AY.26	2021-07-27
Mexico|TAB|TAB_InDRE_FB25863_S6386|EPI_ISL_4199437|AY.26|Delta_sub|2021-07-27	Mexico	TAB	TAB_InDRE_FB25863_S6386	EPI_ISL_4199437	AY.26	2021-07-27
Mexico|BCS|BCS_InDRE_FB27933_S6057|EPI_ISL_3923915|AY.26|Delta_sub|2021-07-28	Mexico	BCS	BCS_InDRE_FB27933_S6057	EPI_ISL_3923915	AY.26	2021-07-28
Mexico|BCS|BCS_InDRE_FB27941_S6064|EPI_ISL_3923922|AY.26|Delta_sub|2021-07-28	Mexico	BCS	BCS_InDRE_FB27941_S6064	EPI_ISL_3923922	AY.26	2021-07-28
Mexico|JAL|JAL-InDRE_FB27340_S5816|EPI_ISL_3769114|AY.26|Delta_sub|2021-07-28	Mexico	JAL	JAL-InDRE_FB27340_S5816	EPI_ISL_3769114	AY.26	2021-07-28
Mexico|JAL|JAL-InDRE_FB27305_S5807|EPI_ISL_3769111|AY.26|Delta_sub|2021-07-28	Mexico	JAL	JAL-InDRE_FB27305_S5807	EPI_ISL_3769111	AY.26	2021-07-28
Mexico|ROO|ROO_InDRE_FB28038_S6081|EPI_ISL_3923937|AY.26|Delta_sub|2021-07-28	Mexico	ROO	ROO_InDRE_FB28038_S6081	EPI_ISL_3923937	AY.26	2021-07-28
Mexico|ROO|ROO-INMEGEN-20-348|EPI_ISL_3503716|AY.26|Delta_sub|2021-07-28	Mexico	ROO	ROO-INMEGEN-20-348	EPI_ISL_3503716	AY.26	2021-07-28
Mexico|TAB|TAB-InDRE_FB26453_S5739|EPI_ISL_3769022|AY.26|Delta_sub|2021-07-28	Mexico	TAB	TAB-InDRE_FB26453_S5739	EPI_ISL_3769022	AY.26	2021-07-28
Mexico|COL|COL_LANGEBIO_IMSS_2262|EPI_ISL_3805308|AY.26|Delta_sub|2021-07-29	Mexico	COL	COL_LANGEBIO_IMSS_2262	EPI_ISL_3805308	AY.26	2021-07-29
Mexico|GUA|GUA-InDRE_FB26530_S5761|EPI_ISL_3769036|AY.26|Delta_sub|2021-07-29	Mexico	GUA	GUA-InDRE_FB26530_S5761	EPI_ISL_3769036	AY.26	2021-07-29
Mexico|JAL|JAL-InDRE_FB27329_S5813|EPI_ISL_3769076|AY.26|Delta_sub|2021-07-29	Mexico	JAL	JAL-InDRE_FB27329_S5813	EPI_ISL_3769076	AY.26	2021-07-29
Mexico|TAB|TAB-INMEGEN-20-335|EPI_ISL_3503715|AY.26|Delta_sub|2021-07-29	Mexico	TAB	TAB-INMEGEN-20-335	EPI_ISL_3503715	AY.26	2021-07-29
Mexico|TAB|TAB-InDRE_FB26486_S5748|EPI_ISL_3769028|AY.26|Delta_sub|2021-07-29	Mexico	TAB	TAB-InDRE_FB26486_S5748	EPI_ISL_3769028	AY.26	2021-07-29
Mexico|AGU|AGU_InDRE_FB29436_S6228|EPI_ISL_4199301|AY.26|Delta_sub|2021-07-30	Mexico	AGU	AGU_InDRE_FB29436_S6228	EPI_ISL_4199301	AY.26	2021-07-30
Mexico|BCS|BCS_InDRE_FB27940_S6063|EPI_ISL_3923921|AY.26|Delta_sub|2021-07-30	Mexico	BCS	BCS_InDRE_FB27940_S6063	EPI_ISL_3923921	AY.26	2021-07-30
Mexico|QUE|QUE-InDRE_FB26410_S5730|EPI_ISL_3769017|AY.26|Delta_sub|2021-07-30	Mexico	QUE	QUE-InDRE_FB26410_S5730	EPI_ISL_3769017	AY.26	2021-07-30
Mexico|ROO|ROO_LANGEBIO_IMSS_1956|EPI_ISL_3805684|AY.26|Delta_sub|2021-07-30	Mexico	ROO	ROO_LANGEBIO_IMSS_1956	EPI_ISL_3805684	AY.26	2021-07-30
Mexico|ROO|ROO_LANGEBIO_IMSS_1955|EPI_ISL_3805757|AY.26|Delta_sub|2021-07-30	Mexico	ROO	ROO_LANGEBIO_IMSS_1955	EPI_ISL_3805757	AY.26	2021-07-30
Mexico|TAB|TAB-InDRE_FB26912_S5782|EPI_ISL_3769054|AY.26|Delta_sub|2021-07-30	Mexico	TAB	TAB-InDRE_FB26912_S5782	EPI_ISL_3769054	AY.26	2021-07-30
Mexico|SON|SON_LANGEBIO_IMSS_2281|EPI_ISL_3805349|AY.26|Delta_sub|2021-07-31	Mexico	SON	SON_LANGEBIO_IMSS_2281	EPI_ISL_3805349	AY.26	2021-07-31
Mexico|BCS|BCS_InDRE_FB30554_S6362|EPI_ISL_4199338|AY.26|Delta_sub|2021-08-02	Mexico	BCS	BCS_InDRE_FB30554_S6362	EPI_ISL_4199338	AY.26	2021-08-02
Mexico|CMX|CMX-INMEGEN-20-88|EPI_ISL_3503672|AY.26|Delta_sub|2021-08-02	Mexico	CMX	CMX-INMEGEN-20-88	EPI_ISL_3503672	AY.26	2021-08-02
Mexico|DUR|DUR_LANGEBIO_IMSS_1920|EPI_ISL_3805471|AY.26|Delta_sub|2021-08-02	Mexico	DUR	DUR_LANGEBIO_IMSS_1920	EPI_ISL_3805471	AY.26	2021-08-02
Mexico|NLE|NLE_LANGEBIO_IMSS_1877|EPI_ISL_3805455|AY.26|Delta_sub|2021-08-02	Mexico	NLE	NLE_LANGEBIO_IMSS_1877	EPI_ISL_3805455	AY.26	2021-08-02
Mexico|QUE|QUE_InDRE_FB28437_S5917|EPI_ISL_3923766|AY.26|Delta_sub|2021-08-02	Mexico	QUE	QUE_InDRE_FB28437_S5917	EPI_ISL_3923766	AY.26	2021-08-02
Mexico|AGU|AGU_InDRE_FB29479_S6256|EPI_ISL_4199261|AY.26|Delta_sub|2021-08-03	Mexico	AGU	AGU_InDRE_FB29479_S6256	EPI_ISL_4199261	AY.26	2021-08-03
Mexico|AGU|AGU_InDRE_FB29469_S6248|EPI_ISL_4199237|AY.26|Delta_sub|2021-08-03	Mexico	AGU	AGU_InDRE_FB29469_S6248	EPI_ISL_4199237	AY.26	2021-08-03
Mexico|BCS|BCS_InDRE_FB30571_S6375|EPI_ISL_4199325|AY.26|Delta_sub|2021-08-03	Mexico	BCS	BCS_InDRE_FB30571_S6375	EPI_ISL_4199325	AY.26	2021-08-03
Mexico|JAL|JAL_InDRE_FB28294_S5900|EPI_ISL_3923805|AY.26|Delta_sub|2021-08-03	Mexico	JAL	JAL_InDRE_FB28294_S5900	EPI_ISL_3923805	AY.26	2021-08-03
Mexico|MEX|MEX-INMEGEN-20-75|EPI_ISL_3503660|AY.26|Delta_sub|2021-08-03	Mexico	MEX	MEX-INMEGEN-20-75	EPI_ISL_3503660	AY.26	2021-08-03
Mexico|ROO|ROO_InDRE_FB30859_S6396|EPI_ISL_4199418|AY.26|Delta_sub|2021-08-03	Mexico	ROO	ROO_InDRE_FB30859_S6396	EPI_ISL_4199418	AY.26	2021-08-03
Mexico|AGU|AGU_InDRE_FB29513_S6278|EPI_ISL_4199298|AY.26|Delta_sub|2021-08-04	Mexico	AGU	AGU_InDRE_FB29513_S6278	EPI_ISL_4199298	AY.26	2021-08-04
Mexico|BCS|BCS_InDRE_FB30565_S6372|EPI_ISL_4199321|AY.26|Delta_sub|2021-08-04	Mexico	BCS	BCS_InDRE_FB30565_S6372	EPI_ISL_4199321	AY.26	2021-08-04
Mexico|TAM|TAM_InDRE_FB32027_S7329|EPI_ISL_4917902|AY.26|Delta_sub|2021-08-04	Mexico	TAM	TAM_InDRE_FB32027_S7329	EPI_ISL_4917902	AY.26	2021-08-04
Mexico|BCN|BCN_LANGEBIO_IMSS_2158|EPI_ISL_3805530|AY.26|Delta_sub|2021-08-05	Mexico	BCN	BCN_LANGEBIO_IMSS_2158	EPI_ISL_3805530	AY.26	2021-08-05
Mexico|CMX|CMX_LANGEBIO_IMSS_2092|EPI_ISL_3805618|AY.26|Delta_sub|2021-08-05	Mexico	CMX	CMX_LANGEBIO_IMSS_2092	EPI_ISL_3805618	AY.26	2021-08-05
Mexico|COL|COL_LANGEBIO_IMSS_2305|EPI_ISL_3805371|AY.26|Delta_sub|2021-08-05	Mexico	COL	COL_LANGEBIO_IMSS_2305	EPI_ISL_3805371	AY.26	2021-08-05
Mexico|CMX|CMX-INMEGEN-26-245|EPI_ISL_4070125|AY.26|Delta_sub|2021-08-06	Mexico	CMX	CMX-INMEGEN-26-245	EPI_ISL_4070125	AY.26	2021-08-06
Mexico|DUR|DUR_IBT_IMSS_2784|EPI_ISL_4006234|AY.26|Delta_sub|2021-08-07	Mexico	DUR	DUR_IBT_IMSS_2784	EPI_ISL_4006234	AY.26	2021-08-07
Mexico|CMX|CMX-INMEGEN-21-10|EPI_ISL_3548029|AY.26|Delta_sub|2021-08-09	Mexico	CMX	CMX-INMEGEN-21-10	EPI_ISL_3548029	AY.26	2021-08-09
Mexico|SIN|SIN_IBT_IMSS_2685|EPI_ISL_4006584|AY.26|Delta_sub|2021-08-09	Mexico	SIN	SIN_IBT_IMSS_2685	EPI_ISL_4006584	AY.26	2021-08-09
Mexico|SON|SON_InDRE_FB32770_S6947|EPI_ISL_4602905|AY.26|Delta_sub|2021-08-09	Mexico	SON	SON_InDRE_FB32770_S6947	EPI_ISL_4602905	AY.26	2021-08-09
Mexico|YUC|YUC-INMEGEN-22-359|EPI_ISL_3721719|AY.26|Delta_sub|2021-08-09	Mexico	YUC	YUC-INMEGEN-22-359	EPI_ISL_3721719	AY.26	2021-08-09
Mexico|NAY|NAY_IBT_IMSS_2673|EPI_ISL_4006572|AY.26|Delta_sub|2021-08-10	Mexico	NAY	NAY_IBT_IMSS_2673	EPI_ISL_4006572	AY.26	2021-08-10
Mexico|SON|SON_IBT_IMSS_2683|EPI_ISL_4006582|AY.26|Delta_sub|2021-08-10	Mexico	SON	SON_IBT_IMSS_2683	EPI_ISL_4006582	AY.26	2021-08-10
Mexico|JAL|JAL_IBT_IMSS_2672|EPI_ISL_4006571|AY.26|Delta_sub|2021-08-11	Mexico	JAL	JAL_IBT_IMSS_2672	EPI_ISL_4006571	AY.26	2021-08-11
Mexico|JAL|JAL_IBT_IMSS_2659|EPI_ISL_4006558|AY.26|Delta_sub|2021-08-11	Mexico	JAL	JAL_IBT_IMSS_2659	EPI_ISL_4006558	AY.26	2021-08-11
Mexico|JAL|JAL_IBT_IMSS_2665|EPI_ISL_4006564|AY.26|Delta_sub|2021-08-11	Mexico	JAL	JAL_IBT_IMSS_2665	EPI_ISL_4006564	AY.26	2021-08-11
Mexico|MEX|MEX-INMEGEN-22-262|EPI_ISL_3721711|AY.26|Delta_sub|2021-08-12	Mexico	MEX	MEX-INMEGEN-22-262	EPI_ISL_3721711	AY.26	2021-08-12
Mexico|SIN|SIN_IBT_IMSS_2701|EPI_ISL_4006600|AY.26|Delta_sub|2021-08-12	Mexico	SIN	SIN_IBT_IMSS_2701	EPI_ISL_4006600	AY.26	2021-08-12
Mexico|SLP|SLP-InDRE-FB33350-S6592|EPI_ISL_4298690|AY.26|Delta_sub|2021-08-12	Mexico	SLP	SLP-InDRE-FB33350-S6592	EPI_ISL_4298690	AY.26	2021-08-12
Mexico|BCN|BCN_IBT_IMSS_2928|EPI_ISL_4006447|AY.26|Delta_sub|2021-08-13	Mexico	BCN	BCN_IBT_IMSS_2928	EPI_ISL_4006447	AY.26	2021-08-13
Mexico|DUR|DUR_IBT_IMSS_2845|EPI_ISL_4006296|AY.26|Delta_sub|2021-08-13	Mexico	DUR	DUR_IBT_IMSS_2845	EPI_ISL_4006296	AY.26	2021-08-13
Mexico|SIN|SIN_IBT_IMSS_2758|EPI_ISL_4006657|AY.26|Delta_sub|2021-08-13	Mexico	SIN	SIN_IBT_IMSS_2758	EPI_ISL_4006657	AY.26	2021-08-13
Mexico|TAM|TAM-InDRE-FB34157-S6799|EPI_ISL_4298897|AY.26|Delta_sub|2021-08-13	Mexico	TAM	TAM-InDRE-FB34157-S6799	EPI_ISL_4298897	AY.26	2021-08-13
Mexico|ROO|ROO-INMEGEN-23-92|EPI_ISL_3905970|AY.26|Delta_sub|2021-08-14	Mexico	ROO	ROO-INMEGEN-23-92	EPI_ISL_3905970	AY.26	2021-08-14
Mexico|YUC|YUC-Biomedicos-8140321|EPI_ISL_3981838|AY.26|Delta_sub|2021-08-14	Mexico	YUC	YUC-Biomedicos-8140321	EPI_ISL_3981838	AY.26	2021-08-14
Mexico|ROO|ROO_IBT_IMSS_2638|EPI_ISL_4006358|AY.26|Delta_sub|2021-08-15	Mexico	ROO	ROO_IBT_IMSS_2638	EPI_ISL_4006358	AY.26	2021-08-15
Mexico|BCS|BCS-InDRE-FB34431-S6861|EPI_ISL_4298959|AY.26|Delta_sub|2021-08-16	Mexico	BCS	BCS-InDRE-FB34431-S6861	EPI_ISL_4298959	AY.26	2021-08-16
Mexico|CMX|CMX-INMEGEN-22-172|EPI_ISL_3721650|AY.26|Delta_sub|2021-08-16	Mexico	CMX	CMX-INMEGEN-22-172	EPI_ISL_3721650	AY.26	2021-08-16
Mexico|GUA|GUA-InDRE-FB33553-S6607|EPI_ISL_4298705|AY.26|Delta_sub|2021-08-16	Mexico	GUA	GUA-InDRE-FB33553-S6607	EPI_ISL_4298705	AY.26	2021-08-16
Mexico|MOR|MOR-InDRE-FB32885-S6705|EPI_ISL_4298803|AY.26|Delta_sub|2021-08-16	Mexico	MOR	MOR-InDRE-FB32885-S6705	EPI_ISL_4298803	AY.26	2021-08-16
Mexico|QUE|QUE-InDRE-FB32963-S6717|EPI_ISL_4298815|AY.26|Delta_sub|2021-08-16	Mexico	QUE	QUE-InDRE-FB32963-S6717	EPI_ISL_4298815	AY.26	2021-08-16
Mexico|SIN|SIN_CIAD-CLN_D2429|EPI_ISL_4956293|AY.26|Delta_sub|2021-08-16	Mexico	SIN	SIN_CIAD-CLN_D2429	EPI_ISL_4956293	AY.26	2021-08-16
Mexico|YUC|YUC-INMEGEN-23-23|EPI_ISL_3905950|AY.26|Delta_sub|2021-08-16	Mexico	YUC	YUC-INMEGEN-23-23	EPI_ISL_3905950	AY.26	2021-08-16
Mexico|YUC|YUC-INMEGEN-23-86|EPI_ISL_5778128|AY.26|Delta_sub|2021-08-16	Mexico	YUC	YUC-INMEGEN-23-86	EPI_ISL_5778128	AY.26	2021-08-16
Mexico|NLE|NLE-InDRE-FB33852-S6643|EPI_ISL_4298741|AY.26|Delta_sub|2021-08-17	Mexico	NLE	NLE-InDRE-FB33852-S6643	EPI_ISL_4298741	AY.26	2021-08-17
Mexico|QUE|QUE-InDRE-FB33001-S6721|EPI_ISL_4298819|AY.26|Delta_sub|2021-08-17	Mexico	QUE	QUE-InDRE-FB33001-S6721	EPI_ISL_4298819	AY.26	2021-08-17
Mexico|BCS|BCS-InDRE-FB34439-S6866|EPI_ISL_4298964|AY.26|Delta_sub|2021-08-18	Mexico	BCS	BCS-InDRE-FB34439-S6866	EPI_ISL_4298964	AY.26	2021-08-18
Mexico|BCS|BCS-InDRE-FB34446-S6870|EPI_ISL_4298968|AY.26|Delta_sub|2021-08-18	Mexico	BCS	BCS-InDRE-FB34446-S6870	EPI_ISL_4298968	AY.26	2021-08-18
Mexico|CAM|CAM-InDRE-FB34210-S6807|EPI_ISL_4298905|AY.26|Delta_sub|2021-08-18	Mexico	CAM	CAM-InDRE-FB34210-S6807	EPI_ISL_4298905	AY.26	2021-08-18
Mexico|CMX|CMX-InDRE-FB34417-S6857|EPI_ISL_4298955|AY.26|Delta_sub|2021-08-18	Mexico	CMX	CMX-InDRE-FB34417-S6857	EPI_ISL_4298955	AY.26	2021-08-18
Mexico|NAY|NAY-InDRE-FB34362-S6833|EPI_ISL_4298931|AY.26|Delta_sub|2021-08-18	Mexico	NAY	NAY-InDRE-FB34362-S6833	EPI_ISL_4298931	AY.26	2021-08-18
Mexico|ROO|ROO-INMEGEN-24-28|EPI_ISL_3943316|AY.26|Delta_sub|2021-08-18	Mexico	ROO	ROO-INMEGEN-24-28	EPI_ISL_3943316	AY.26	2021-08-18
Mexico|CAM|CAM-InDRE-FB34293-S6820|EPI_ISL_4298918|AY.26|Delta_sub|2021-08-19	Mexico	CAM	CAM-InDRE-FB34293-S6820	EPI_ISL_4298918	AY.26	2021-08-19
Mexico|NAY|NAY-InDRE-FB34304-S6825|EPI_ISL_4298923|AY.26|Delta_sub|2021-08-19	Mexico	NAY	NAY-InDRE-FB34304-S6825	EPI_ISL_4298923	AY.26	2021-08-19
Mexico|SIN|SIN-InDRE-FB33107-S6733|EPI_ISL_4298831|AY.26|Delta_sub|2021-08-19	Mexico	SIN	SIN-InDRE-FB33107-S6733	EPI_ISL_4298831	AY.26	2021-08-19
Mexico|SIN|SIN_CIAD-CLN_D2686|EPI_ISL_4956345|AY.26|Delta_sub|2021-08-19	Mexico	SIN	SIN_CIAD-CLN_D2686	EPI_ISL_4956345	AY.26	2021-08-19
Mexico|JAL|JAL-InDRE-FB33195-S6745|EPI_ISL_4298843|AY.26|Delta_sub|2021-08-20	Mexico	JAL	JAL-InDRE-FB33195-S6745	EPI_ISL_4298843	AY.26	2021-08-20
Mexico|ZAC|ZAC_IBT_IMSS_2586|EPI_ISL_4006713|AY.26|Delta_sub|2021-08-22	Mexico	ZAC	ZAC_IBT_IMSS_2586	EPI_ISL_4006713	AY.26	2021-08-22
Mexico|TAB|TAB-InDRE-FB34353-S6827|EPI_ISL_4298925|AY.26|Delta_sub|2021-08-23	Mexico	TAB	TAB-InDRE-FB34353-S6827	EPI_ISL_4298925	AY.26	2021-08-23
Mexico|ROO|ROO-INMEGEN-25-144|EPI_ISL_4024732|AY.26|Delta_sub|2021-08-25	Mexico	ROO	ROO-INMEGEN-25-144	EPI_ISL_4024732	AY.26	2021-08-25
Mexico|YUC|YUC-INMEGEN-25-98|EPI_ISL_4025050|AY.26|Delta_sub|2021-08-25	Mexico	YUC	YUC-INMEGEN-25-98	EPI_ISL_4025050	AY.26	2021-08-25
Mexico|JAL|JAL_INER_IMSS_2288|EPI_ISL_4299711|AY.26|Delta_sub|2021-08-26	Mexico	JAL	JAL_INER_IMSS_2288	EPI_ISL_4299711	AY.26	2021-08-26
Mexico|VER|VER-INMEGEN-25-161|EPI_ISL_4024760|AY.26|Delta_sub|2021-08-26	Mexico	VER	VER-INMEGEN-25-161	EPI_ISL_4024760	AY.26	2021-08-26
Mexico|YUC|YUC-INMEGEN-25-186|EPI_ISL_4024784|AY.26|Delta_sub|2021-08-26	Mexico	YUC	YUC-INMEGEN-25-186	EPI_ISL_4024784	AY.26	2021-08-26
Mexico|ROO|ROO_LANGEBIO_IMSS_2302|EPI_ISL_4550152|AY.26|Delta_sub|2021-08-28	Mexico	ROO	ROO_LANGEBIO_IMSS_2302	EPI_ISL_4550152	AY.26	2021-08-28
Mexico|VER|VER-INMEGEN-25-109|EPI_ISL_4024695|AY.26|Delta_sub|2021-08-28	Mexico	VER	VER-INMEGEN-25-109	EPI_ISL_4024695	AY.26	2021-08-28
Mexico|GUA|GUA_LANGEBIO_IMSS_2545|EPI_ISL_4549967|AY.26|Delta_sub|2021-08-29	Mexico	GUA	GUA_LANGEBIO_IMSS_2545	EPI_ISL_4549967	AY.26	2021-08-29
Mexico|MEX|MEX-INMEGEN-25-46|EPI_ISL_4024660|AY.26|Delta_sub|2021-08-29	Mexico	MEX	MEX-INMEGEN-25-46	EPI_ISL_4024660	AY.26	2021-08-29
Mexico|JAL|JAL_LANGEBIO_IMSS_2515|EPI_ISL_4550009|AY.26|Delta_sub|2021-08-30	Mexico	JAL	JAL_LANGEBIO_IMSS_2515	EPI_ISL_4550009	AY.26	2021-08-30
Mexico|MEX|MEX-INMEGEN-25-21|EPI_ISL_4024654|AY.26|Delta_sub|2021-08-30	Mexico	MEX	MEX-INMEGEN-25-21	EPI_ISL_4024654	AY.26	2021-08-30
Mexico|NAY|NAY_InDRE_FB39123_S7190|EPI_ISL_4603152|AY.26|Delta_sub|2021-08-31	Mexico	NAY	NAY_InDRE_FB39123_S7190	EPI_ISL_4603152	AY.26	2021-08-31
Mexico|YUC|YUC_LANGEBIO_IMSS_2293|EPI_ISL_4550252|AY.26|Delta_sub|2021-08-31	Mexico	YUC	YUC_LANGEBIO_IMSS_2293	EPI_ISL_4550252	AY.26	2021-08-31
Mexico|AGU|AGU_InDRE_FB38934_S7146|EPI_ISL_4603108|AY.26|Delta_sub|2021-09-01	Mexico	AGU	AGU_InDRE_FB38934_S7146	EPI_ISL_4603108	AY.26	2021-09-01
Mexico|AGU|AGU_InDRE_FB38942_S7151|EPI_ISL_4603113|AY.26|Delta_sub|2021-09-01	Mexico	AGU	AGU_InDRE_FB38942_S7151	EPI_ISL_4603113	AY.26	2021-09-01
Mexico|COA|COA_LANGEBIO_IMSS_2260|EPI_ISL_4549936|AY.26|Delta_sub|2021-09-01	Mexico	COA	COA_LANGEBIO_IMSS_2260	EPI_ISL_4549936	AY.26	2021-09-01
Mexico|MIC|MIC_InDRE_FB38101_S7040|EPI_ISL_4602998|AY.26|Delta_sub|2021-09-01	Mexico	MIC	MIC_InDRE_FB38101_S7040	EPI_ISL_4602998	AY.26	2021-09-01
Mexico|SIN|SIN_InDRE_FB39012_S7177|EPI_ISL_4603139|AY.26|Delta_sub|2021-09-02	Mexico	SIN	SIN_InDRE_FB39012_S7177	EPI_ISL_4603139	AY.26	2021-09-02
Mexico|ZAC|ZAC_InDRE_FB39222_S7206|EPI_ISL_4603168|AY.26|Delta_sub|2021-09-02	Mexico	ZAC	ZAC_InDRE_FB39222_S7206	EPI_ISL_4603168	AY.26	2021-09-02
Mexico|QUE|QUE_InDRE_FB38889_S7130|EPI_ISL_4603090|AY.26|Delta_sub|2021-09-04	Mexico	QUE	QUE_InDRE_FB38889_S7130	EPI_ISL_4603090	AY.26	2021-09-04
Mexico|YUC|YUC-INMEGEN-27-110|EPI_ISL_4232382|AY.26|Delta_sub|2021-09-04	Mexico	YUC	YUC-INMEGEN-27-110	EPI_ISL_4232382	AY.26	2021-09-04
Mexico|ZAC|ZAC_InDRE_FB39233_S7217|EPI_ISL_4603181|AY.26|Delta_sub|2021-09-04	Mexico	ZAC	ZAC_InDRE_FB39233_S7217	EPI_ISL_4603181	AY.26	2021-09-04
Mexico|YUC|YUC-INMEGEN-27-142|EPI_ISL_4232380|AY.26|Delta_sub|2021-09-05	Mexico	YUC	YUC-INMEGEN-27-142	EPI_ISL_4232380	AY.26	2021-09-05
Mexico|CMX|CMX-INMEGEN-27-288|EPI_ISL_4232346|AY.26|Delta_sub|2021-09-06	Mexico	CMX	CMX-INMEGEN-27-288	EPI_ISL_4232346	AY.26	2021-09-06
Mexico|GRO|GRO_InDRE_FB40837_S7454|EPI_ISL_4918317|AY.26|Delta_sub|2021-09-06	Mexico	GRO	GRO_InDRE_FB40837_S7454	EPI_ISL_4918317	AY.26	2021-09-06
Mexico|JAL|JAL_InDRE_FB37967_S7031|EPI_ISL_4602989|AY.26|Delta_sub|2021-09-06	Mexico	JAL	JAL_InDRE_FB37967_S7031	EPI_ISL_4602989	AY.26	2021-09-06
Mexico|SIN|SIN_IBT_IMSS_3234|EPI_ISL_4878893|AY.26|Delta_sub|2021-09-06	Mexico	SIN	SIN_IBT_IMSS_3234	EPI_ISL_4878893	AY.26	2021-09-06
Mexico|BCN|BCN_InDRE_FB41351_S7497|EPI_ISL_4918734|AY.26|Delta_sub|2021-09-07	Mexico	BCN	BCN_InDRE_FB41351_S7497	EPI_ISL_4918734	AY.26	2021-09-07
Mexico|COL|COL_IBT_IMSS_3239|EPI_ISL_4878897|AY.26|Delta_sub|2021-09-07	Mexico	COL	COL_IBT_IMSS_3239	EPI_ISL_4878897	AY.26	2021-09-07
Mexico|COL|COL_IBT_IMSS_3214|EPI_ISL_4878874|AY.26|Delta_sub|2021-09-07	Mexico	COL	COL_IBT_IMSS_3214	EPI_ISL_4878874	AY.26	2021-09-07
Mexico|GUA|GUA_IBT_IMSS_3200|EPI_ISL_4878860|AY.26|Delta_sub|2021-09-07	Mexico	GUA	GUA_IBT_IMSS_3200	EPI_ISL_4878860	AY.26	2021-09-07
Mexico|SIN|SIN_IBT_IMSS_3251|EPI_ISL_4878912|AY.26|Delta_sub|2021-09-07	Mexico	SIN	SIN_IBT_IMSS_3251	EPI_ISL_4878912	AY.26	2021-09-07
Mexico|YUC|YUC_IBT_IMSS_3087|EPI_ISL_4878646|AY.26|Delta_sub|2021-09-07	Mexico	YUC	YUC_IBT_IMSS_3087	EPI_ISL_4878646	AY.26	2021-09-07
Mexico|AGU|AGU_InDRE_FB40065_S7402|EPI_ISL_4918780|AY.26|Delta_sub|2021-09-08	Mexico	AGU	AGU_InDRE_FB40065_S7402	EPI_ISL_4918780	AY.26	2021-09-08
Mexico|QUE|QUE_InDRE_FB39792_S7368|EPI_ISL_4917964|AY.26|Delta_sub|2021-09-08	Mexico	QUE	QUE_InDRE_FB39792_S7368	EPI_ISL_4917964	AY.26	2021-09-08
Mexico|SON|SON_IBT_IMSS_3260|EPI_ISL_4878920|AY.26|Delta_sub|2021-09-08	Mexico	SON	SON_IBT_IMSS_3260	EPI_ISL_4878920	AY.26	2021-09-08
Mexico|YUC|YUC-INMEGEN-28-228|EPI_ISL_4512843|AY.26|Delta_sub|2021-09-08	Mexico	YUC	YUC-INMEGEN-28-228	EPI_ISL_4512843	AY.26	2021-09-08
Mexico|HID|HID_IBT_IMSS_3424|EPI_ISL_4878751|AY.26|Delta_sub|2021-09-09	Mexico	HID	HID_IBT_IMSS_3424	EPI_ISL_4878751	AY.26	2021-09-09
Mexico|JAL|JAL_InDRE_FB40699_S7433|EPI_ISL_4918120|AY.26|Delta_sub|2021-09-09	Mexico	JAL	JAL_InDRE_FB40699_S7433	EPI_ISL_4918120	AY.26	2021-09-09
Mexico|JAL|JAL_IBT_IMSS_3266|EPI_ISL_4878926|AY.26|Delta_sub|2021-09-10	Mexico	JAL	JAL_IBT_IMSS_3266	EPI_ISL_4878926	AY.26	2021-09-10
Mexico|TAB|TAB_InDRE_FB40673_S7425|EPI_ISL_4917923|AY.26|Delta_sub|2021-09-10	Mexico	TAB	TAB_InDRE_FB40673_S7425	EPI_ISL_4917923	AY.26	2021-09-10
Mexico|TAM|TAM-INMEGEN-28-194|EPI_ISL_4512810|AY.26|Delta_sub|2021-09-10	Mexico	TAM	TAM-INMEGEN-28-194	EPI_ISL_4512810	AY.26	2021-09-10
Mexico|YUC|YUC_InDRE_FB41184_S7479|EPI_ISL_4917884|AY.26|Delta_sub|2021-09-10	Mexico	YUC	YUC_InDRE_FB41184_S7479	EPI_ISL_4917884	AY.26	2021-09-10
Mexico|CHH|CHH_IBT_IMSS_3362|EPI_ISL_4878638|AY.26|Delta_sub|2021-09-12	Mexico	CHH	CHH_IBT_IMSS_3362	EPI_ISL_4878638	AY.26	2021-09-12
Mexico|CAM|CAM_InDRE_FB42419_S7712|EPI_ISL_5428104|AY.26|Delta_sub|2021-09-13	Mexico	CAM	CAM_InDRE_FB42419_S7712	EPI_ISL_5428104	AY.26	2021-09-13
Mexico|ROO|ROO_InDRE_FB43061_S7871|EPI_ISL_5428244|AY.26|Delta_sub|2021-09-14	Mexico	ROO	ROO_InDRE_FB43061_S7871	EPI_ISL_5428244	AY.26	2021-09-14
Mexico|ZAC|ZAC_IBT_IMSS_3069|EPI_ISL_4878974|AY.26|Delta_sub|2021-09-14	Mexico	ZAC	ZAC_IBT_IMSS_3069	EPI_ISL_4878974	AY.26	2021-09-14
Mexico|HID|HID-INMEGEN-29-256|EPI_ISL_4745976|AY.26|Delta_sub|2021-09-15	Mexico	HID	HID-INMEGEN-29-256	EPI_ISL_4745976	AY.26	2021-09-15
Mexico|MIC|MIC_InDRE_FB42602_S7826|EPI_ISL_5428203|AY.26|Delta_sub|2021-09-15	Mexico	MIC	MIC_InDRE_FB42602_S7826	EPI_ISL_5428203	AY.26	2021-09-15
Mexico|SON|SON_InDRE_FB43166_S7891|EPI_ISL_5428262|AY.26|Delta_sub|2021-09-17	Mexico	SON	SON_InDRE_FB43166_S7891	EPI_ISL_5428262	AY.26	2021-09-17
Mexico|MEX|MEX-INMEGEN-29-198|EPI_ISL_4745754|AY.26|Delta_sub|2021-09-18	Mexico	MEX	MEX-INMEGEN-29-198	EPI_ISL_4745754	AY.26	2021-09-18
Mexico|YUC|YUC_InDRE_FB44408_S8095|EPI_ISL_5686945|AY.26|Delta_sub|2021-09-23	Mexico	YUC	YUC_InDRE_FB44408_S8095	EPI_ISL_5686945	AY.26	2021-09-23
Mexico|CAM|CAM_InDRE_FB44454_S8108|EPI_ISL_5686692|AY.26|Delta_sub|2021-09-24	Mexico	CAM	CAM_InDRE_FB44454_S8108	EPI_ISL_5686692	AY.26	2021-09-24
Mexico|MIC|MIC_LANGEBIO_IMSS_2989|EPI_ISL_5851017|AY.26|Delta_sub|2021-09-25	Mexico	MIC	MIC_LANGEBIO_IMSS_2989	EPI_ISL_5851017	AY.26	2021-09-25
Mexico|SIN|SIN_LANGEBIO_IMSS_3031|EPI_ISL_5851058|AY.26|Delta_sub|2021-09-25	Mexico	SIN	SIN_LANGEBIO_IMSS_3031	EPI_ISL_5851058	AY.26	2021-09-25
Mexico|BCS|BCS_LANGEBIO_IMSS_2841|EPI_ISL_5850865|AY.26|Delta_sub|2021-09-26	Mexico	BCS	BCS_LANGEBIO_IMSS_2841	EPI_ISL_5850865	AY.26	2021-09-26
Mexico|TAB|TAB-INMEGEN-30-82|EPI_ISL_5030941|AY.26|Delta_sub|2021-09-27	Mexico	TAB	TAB-INMEGEN-30-82	EPI_ISL_5030941	AY.26	2021-09-27
Mexico|YUC|YUC-INMEGEN-30-89|EPI_ISL_5030977|AY.26|Delta_sub|2021-09-27	Mexico	YUC	YUC-INMEGEN-30-89	EPI_ISL_5030977	AY.26	2021-09-27
Mexico|SIN|SIN_LANGEBIO_IMSS_3064|EPI_ISL_5851097|AY.26|Delta_sub|2021-09-28	Mexico	SIN	SIN_LANGEBIO_IMSS_3064	EPI_ISL_5851097	AY.26	2021-09-28
Mexico|SIN|SIN_InDRE_FB46093_S8512|EPI_ISL_6097681|AY.26|Delta_sub|2021-09-29	Mexico	SIN	SIN_InDRE_FB46093_S8512	EPI_ISL_6097681	AY.26	2021-09-29
Mexico|SLP|SLP_INER_IMSS_3133|EPI_ISL_6227522|AY.26|Delta_sub|2021-09-30	Mexico	SLP	SLP_INER_IMSS_3133	EPI_ISL_6227522	AY.26	2021-09-30
Mexico|BCS|BCS_InDRE_FB45904_S8472|EPI_ISL_6097892|AY.26|Delta_sub|2021-10-02	Mexico	BCS	BCS_InDRE_FB45904_S8472	EPI_ISL_6097892	AY.26	2021-10-02
Mexico|BCN|BCN_InDRE_FB46064_S8505|EPI_ISL_6097901|AY.26|Delta_sub|2021-10-04	Mexico	BCN	BCN_InDRE_FB46064_S8505	EPI_ISL_6097901	AY.26	2021-10-04
Mexico|QUE|QUE_InDRE_FB47019_S8653|EPI_ISL_6097690|AY.26|Delta_sub|2021-10-04	Mexico	QUE	QUE_InDRE_FB47019_S8653	EPI_ISL_6097690	AY.26	2021-10-04
Mexico|BCS|BCS_IBT_IMSS_3875|EPI_ISL_5937002|AY.26|Delta_sub|2021-10-05	Mexico	BCS	BCS_IBT_IMSS_3875	EPI_ISL_5937002	AY.26	2021-10-05
Mexico|SIN|SIN_IBT_IMSS_3731|EPI_ISL_5936785|AY.26|Delta_sub|2021-10-07	Mexico	SIN	SIN_IBT_IMSS_3731	EPI_ISL_5936785	AY.26	2021-10-07
Mexico|ROO|ROO_IBT_IMSS_3643|EPI_ISL_5936823|AY.26|Delta_sub|2021-10-10	Mexico	ROO	ROO_IBT_IMSS_3643	EPI_ISL_5936823	AY.26	2021-10-10
Mexico|CMX|CMX-INMEGEN-33-27|EPI_ISL_5846010|AY.26|Delta_sub|2021-10-15	Mexico	CMX	CMX-INMEGEN-33-27	EPI_ISL_5846010	AY.26	2021-10-15
Mexico|CMX|CMX-INMEGEN-35-37|EPI_ISL_6181631|AY.26|Delta_sub|2021-10-25	Mexico	CMX	CMX-INMEGEN-35-37	EPI_ISL_6181631	AY.26	2021-10-25
Mexico|YUC|YUC_LANGEBIO_IMSS_3199|EPI_ISL_6775357|AY.26|Delta_sub|2021-10-25	Mexico	YUC	YUC_LANGEBIO_IMSS_3199	EPI_ISL_6775357	AY.26	2021-10-25
Mexico|JAL|JAL_LANGEBIO_IMSS_3386|EPI_ISL_6775597|AY.26|Delta_sub|2021-10-28	Mexico	JAL	JAL_LANGEBIO_IMSS_3386	EPI_ISL_6775597	AY.26	2021-10-28
Mexico|SIN|SIN_IBT_IMSS_4094|EPI_ISL_6863722|AY.26|Delta_sub|2021-10-28	Mexico	SIN	SIN_IBT_IMSS_4094	EPI_ISL_6863722	AY.26	2021-10-28
Mexico|YUC|YUC-INMEGEN-35-129|EPI_ISL_6181661|AY.26|Delta_sub|2021-11-01	Mexico	YUC	YUC-INMEGEN-35-129	EPI_ISL_6181661	AY.26	2021-11-01
Mexico|YUC|YUC-INMEGEN-36-172|EPI_ISL_6507713|AY.26|Delta_sub|2021-11-02	Mexico	YUC	YUC-INMEGEN-36-172	EPI_ISL_6507713	AY.26	2021-11-02
Mexico|GUA|GUA_IBT_IMSS_4115|EPI_ISL_6863743|AY.26|Delta_sub|2021-11-03	Mexico	GUA	GUA_IBT_IMSS_4115	EPI_ISL_6863743	AY.26	2021-11-03
Mexico|JAL|JAL_IBT_IMSS_4113|EPI_ISL_6863741|AY.26|Delta_sub|2021-11-05	Mexico	JAL	JAL_IBT_IMSS_4113	EPI_ISL_6863741	AY.26	2021-11-05
Mexico|CMX|CMX-INMEGEN-37-123|EPI_ISL_6811955|AY.26|Delta_sub|2021-11-09	Mexico	CMX	CMX-INMEGEN-37-123	EPI_ISL_6811955	AY.26	2021-11-09
Mexico|SIN|SIN_IBT_IMSS_4148|EPI_ISL_6863778|AY.26|Delta_sub|2021-11-09	Mexico	SIN	SIN_IBT_IMSS_4148	EPI_ISL_6863778	AY.26	2021-11-09
Mexico|SIN|SIN_IBT_IMSS_4147|EPI_ISL_6863777|AY.26|Delta_sub|2021-11-09	Mexico	SIN	SIN_IBT_IMSS_4147	EPI_ISL_6863777	AY.26	2021-11-09
Mexico|CMX|CMX-INMEGEN-37-154|EPI_ISL_6812093|AY.26|Delta_sub|2021-11-12	Mexico	CMX	CMX-INMEGEN-37-154	EPI_ISL_6812093	AY.26	2021-11-12

[truncated: 5 more sheets: B_1_617_2_C2d, B_1_617_2_C3d, B_1_617_2_C4d, B_1_617_2_C5d, B_1_617_2_C6d]
