# Supplementary material for: Comparing the evolutionary dynamics of predominant SARS-CoV-2 virus lineages co-circulating in Mexico
Source: eLife. 2023 Jul 27;12:e82069. doi: 10.7554/eLife.82069 (PMC10431917; doi:10.7554/eLife.82069)
Supplement: Supplementary file 3. [file elife-82069-supp3.xls]

## Sheet: Ranked_Connectivity_South
Ranking connectivity between the southern region of the country *,†
Rank/Date	2020-01	2020-02	2020-03	2020-04	2020-05	2020-06	2020-07	2020-08	2020-09	2020-10	2020-11	2020-12	2021-01	2021-02	2021-03	2021-04	2021-05	2021-06	2021-07	2021-08	2021-09	2021-10	2021-11	2021-12
1	Tabasco	Tabasco	Tabasco	Tabasco	Tabasco	Tabasco	Tabasco	Tabasco	Tabasco	Tabasco	Tabasco	Tabasco	Tabasco	Ciudad de Mexico	Ciudad de Mexico	Ciudad de Mexico	Tabasco	Tabasco	Tabasco	Ciudad de Mexico	Ciudad de Mexico	Ciudad de Mexico	Ciudad de Mexico	Ciudad de Mexico
2	Ciudad de Mexico	Ciudad de Mexico	Ciudad de Mexico	Ciudad de Mexico	Ciudad de Mexico	Ciudad de Mexico	Ciudad de Mexico	Ciudad de Mexico	Ciudad de Mexico	Ciudad de Mexico	Ciudad de Mexico	Ciudad de Mexico	Ciudad de Mexico	Tabasco	Tabasco	Tabasco	Ciudad de Mexico	Ciudad de Mexico	Ciudad de Mexico	Tabasco	Tabasco	Tabasco	Tabasco	Tabasco
3	Veracruz	Puebla	Veracruz	Veracruz	Veracruz	Veracruz	Veracruz	Veracruz	Veracruz	Veracruz	Veracruz	Veracruz	Veracruz	Mexico	Veracruz	Veracruz	Veracruz	Mexico	Veracruz	Veracruz	Veracruz	Veracruz	Veracruz	Mexico
4	Oaxaca	Veracruz	Nuevo Leon	Mexico	Oaxaca	Coahuila	Oaxaca	Coahuila	Coahuila	Nuevo Leon	Tamaulipas	Nuevo Leon	Puebla	Veracruz	Puebla	Puebla	Puebla	Veracruz	Puebla	Puebla	Mexico	Mexico	Mexico	Veracruz
5	Puebla	Guanajuato	Puebla	Nuevo Leon	Puebla	Oaxaca	Nuevo Leon	Nuevo Leon	Nuevo Leon	Tamaulipas	Nuevo Leon	Tamaulipas	Nuevo Leon	Puebla	Mexico	Oaxaca	Nuevo Leon	Puebla	Guanajuato	Mexico	Puebla	Puebla	Puebla	Puebla
6	Nuevo Leon	Nuevo Leon	Mexico	Puebla	Nuevo Leon	Nuevo Leon	Coahuila	Oaxaca	Puebla	Puebla	Puebla	Puebla	Mexico	Oaxaca	Oaxaca	Mexico	Mexico	Nuevo Leon	Mexico	Morelos	Tamaulipas	Tamaulipas	Oaxaca	Jalisco
7	Tamaulipas	Morelos	Oaxaca	Guanajuato	Tamaulipas	Puebla	Puebla	Puebla	Oaxaca	Chihuahua	Jalisco	Chihuahua	Tamaulipas	Nuevo Leon	Nuevo Leon	Nuevo Leon	Jalisco	Jalisco	Morelos	Nuevo Leon	Jalisco	Jalisco	Jalisco	Oaxaca
8	Coahuila	Jalisco	Jalisco	Jalisco	Morelos	Morelos	Morelos	Chihuahua	Tamaulipas	Morelos	Morelos	Jalisco	Guanajuato	Hidalgo	Jalisco	Chihuahua	Guanajuato	Guanajuato	Nuevo Leon	Oaxaca	Morelos	Baja California	Nuevo Leon	Morelos
9	Jalisco	Tamaulipas	Tamaulipas	Chihuahua	Guerrero	Jalisco	Chihuahua	Morelos	Chihuahua	Oaxaca	Oaxaca	Oaxaca	Jalisco	Morelos	Hidalgo	Jalisco	Morelos	Michoacan	Oaxaca	Baja California	Oaxaca	Morelos	Morelos	Nuevo Leon
10	Morelos	Oaxaca	Chihuahua	Oaxaca	Coahuila	Chihuahua	Tamaulipas	Tamaulipas	Morelos	Coahuila	Chihuahua	Morelos	Chihuahua	Jalisco	Morelos	Morelos	Chihuahua	Morelos	Jalisco	Jalisco	Sinaloa	Oaxaca	Tamaulipas	Guanajuato
11	Guerrero	Coahuila	Guanajuato	Morelos	Mexico	Tamaulipas	Guerrero	Guerrero	Guerrero	Jalisco	Sinaloa	Baja California	Morelos	Chihuahua	Guanajuato	Guanajuato	Tamaulipas	Oaxaca	Coahuila	Hidalgo	Baja California	Nuevo Leon	Baja California	Hidalgo
12	Baja California	Chihuahua	Morelos	Tamaulipas	Jalisco	Guerrero	Baja California	Jalisco	Hidalgo	Baja California	Coahuila	Guanajuato	Oaxaca	Guanajuato	Michoacan	Michoacan	Baja California	Hidalgo	San Luis Potosi	Tamaulipas	Nuevo Leon	Hidalgo	Michoacan	Michoacan
13	Chihuahua	Mexico	Queretaro	Hidalgo	Baja California	Baja California	Mexico	Baja California	Mexico	Hidalgo	Sonora	Coahuila	Hidalgo	Michoacan	Tamaulipas	Hidalgo	Oaxaca	Chihuahua	Nayarit	Chihuahua	Hidalgo	Chihuahua	Hidalgo	Coahuila
14	Sinaloa	Queretaro	Baja California	Coahuila	Chihuahua	Mexico	Jalisco	Hidalgo	Jalisco	Guerrero	Baja California	Hidalgo	Baja California	Tamaulipas	Chihuahua	Baja California	Hidalgo	Queretaro	Tamaulipas	Guanajuato	Sonora	Guanajuato	Guanajuato	Tamaulipas
15	Mexico	San Luis Potosi	Coahuila	Baja California	Hidalgo	Queretaro	Hidalgo	Mexico	Baja California	Mexico	Mexico	Sinaloa	Michoacan	Baja California	Baja California	Tlaxcala	Michoacan	Tamaulipas	Chihuahua	Michoacan	Chihuahua	Coahuila	Queretaro	Chihuahua
16	Baja California Sur	Hidalgo	Hidalgo	Queretaro	Queretaro	San Luis Potosi	Guanajuato	San Luis Potosi	Guanajuato	Sinaloa	Guanajuato	Sonora	Queretaro	Zacatecas	Tlaxcala	Tamaulipas	Queretaro	Baja California	Michoacan	Coahuila	Baja California Sur	Sinaloa	Coahuila	Tlaxcala
17	Sonora	Sonora	San Luis Potosi	Guerrero	Guanajuato	Sonora	San Luis Potosi	Queretaro	San Luis Potosi	Sonora	Baja California Sur	Mexico	Guerrero	Coahuila	Zacatecas	Zacatecas	Zacatecas	San Luis Potosi	Queretaro	Zacatecas	Coahuila	Queretaro	Chihuahua	Queretaro
18	Hidalgo	Baja California	Michoacan	Michoacan	Sinaloa	Hidalgo	Queretaro	Guanajuato	Queretaro	Guanajuato	Hidalgo	Queretaro	Coahuila	Tlaxcala	Coahuila	Coahuila	Coahuila	Zacatecas	Hidalgo	Queretaro	Guanajuato	Tlaxcala	San Luis Potosi	Baja California
19	Guanajuato	Guerrero	Sonora	Sonora	San Luis Potosi	Guanajuato	Michoacan	Tlaxcala	Tlaxcala	San Luis Potosi	Guerrero	Guerrero	San Luis Potosi	Queretaro	Guerrero	Guerrero	San Luis Potosi	Coahuila	Baja California	Guerrero	Tlaxcala	Michoacan	Zacatecas	Zacatecas
20	Queretaro	Michoacan	Guerrero	San Luis Potosi	Sonora	Michoacan	Tlaxcala	Michoacan	Sonora	Queretaro	San Luis Potosi	San Luis Potosi	Durango	Guerrero	Queretaro	Queretaro	Guerrero	Sonora	Aguascalientes	San Luis Potosi	Queretaro	Sonora	Guerrero	San Luis Potosi
21	San Luis Potosi	Aguascalientes	Aguascalientes	Tlaxcala	Michoacan	Sinaloa	Sonora	Sonora	Michoacan	Tlaxcala	Queretaro	Michoacan	Tlaxcala	San Luis Potosi	Sonora	Sonora	Sonora	Guerrero	Zacatecas	Tlaxcala	Zacatecas	Zacatecas	Tlaxcala	Durango
22	Michoacan	Zacatecas	Zacatecas	Zacatecas	Baja California Sur	Tlaxcala	Zacatecas	Aguascalientes	Sinaloa	Baja California Sur	Tlaxcala	Zacatecas	Aguascalientes	Sonora	San Luis Potosi	San Luis Potosi	Durango	Tlaxcala	Guerrero	Sonora	Michoacan	San Luis Potosi	Aguascalientes	Sinaloa
23	Tlaxcala	Tlaxcala	Tlaxcala	Aguascalientes	Zacatecas	Durango	Aguascalientes	Sinaloa	Aguascalientes	Michoacan	Zacatecas	Baja California Sur	Sinaloa	Durango	Durango	Sinaloa	Tlaxcala	Durango	Tlaxcala	Sinaloa	Guerrero	Guerrero	Nayarit	Aguascalientes
24	Aguascalientes	Sinaloa	Sinaloa	Durango	Tlaxcala	Zacatecas	Sinaloa	Zacatecas	Zacatecas	Zacatecas	Michoacan	Tlaxcala	Zacatecas	Aguascalientes	Sinaloa	Durango	Sinaloa	Aguascalientes	Colima	Durango	San Luis Potosi	Baja California Sur	Durango	Guerrero
25	Zacatecas	Nayarit	Durango	Sinaloa	Aguascalientes	Aguascalientes	Durango	Durango	Baja California Sur	Aguascalientes	Aguascalientes	Aguascalientes	Sonora	Sinaloa	Nayarit	Nayarit	Aguascalientes	Sinaloa	Durango	Aguascalientes	Durango	Durango	Sonora	Sonora
26	Durango	Durango	Baja California Sur	Baja California Sur	Durango	Baja California Sur	Baja California Sur	Baja California Sur	Durango	Durango	Durango	Durango	Nayarit	Colima	Aguascalientes	Aguascalientes	Colima	Baja California Sur	Sonora	Baja California Sur	Aguascalientes	Aguascalientes	Sinaloa	Nayarit
27	Nayarit	Colima	Nayarit	Colima	Nayarit	Nayarit	Nayarit	Colima	Colima	Colima	Colima	Nayarit	Baja California Sur	Nayarit	Baja California Sur	Baja California Sur	Baja California Sur	Nayarit	Sinaloa	Nayarit	Nayarit	Nayarit	Colima	Colima
28	Colima	Baja California Sur	Colima	Nayarit	Colima	Colima	Colima	Nayarit	Nayarit	Nayarit	Nayarit	Colima	Colima	Baja California Sur	Colima	Colima	Nayarit	Colima	Baja California Sur	Colima	Colima	Colima	Baja California Sur	Baja California Sur
* The south is represented by the states Yucatán, Quintana Roo, Chiapas and Campeche
† The connectivity measure was defined as the sum of the weights for edges that go from each node (the remaining 28 states) into the group of four nodes representing the ‘south’, reflecting the number of trips in any direction.

## Sheet: Pairwise_Distances_States
AGU	BCN	BCS	CAM	COA	COL	CHP	CHH	CMX	DUR	GUA	GRO	HID	JAL	MEX	MIC	MOR	NAY	NLE	OAX	PUE	QUE	ROO	SLP	SIN	SON	TAB	TAM	TLA	VER	YUC	ZAC
0	1576.83	1069.91	1295	583.003	365.204	1202.71	854.685	449.91	412.482	184.663	542.491	396.532	203.915	405.971	312.752	496.42	257.154	461.164	834.181	569.616	288.837	1499.61	209.94	616.7	1193.59	1113.09	454.266	519.559	683.89	1392.89	144.095
1576.83	0	592.914	2799.03	1319.81	1673.04	2767.55	856.443	2026.5	1177.23	1761.43	2089.13	1962.82	1588.23	1980.86	1822.92	2070.74	1402.52	1580.37	2410.83	2145.12	1858.75	2958.26	1699.55	965.516	424.832	2659.84	1760.87	2093.55	2243.61	2823	1466.7
1069.91	592.914	0	2351.23	1003.15	1102.2	2271.91	636.048	1507.94	721.988	1249.04	1542.82	1466.38	1039.27	1458.23	1274.97	1545.33	857.443	1205.93	1887.91	1634.9	1358.75	2537.82	1230.34	466.077	434.876	2181.79	1356.16	1587.08	1753.6	2415.7	987.815
1295	2799.03	2351.23	0	1511.04	1444.77	343.631	1965.67	922.765	1638.61	1134.58	1017.29	909.258	1397.86	976.105	1210.16	916.59	1541.84	1232.96	675.009	792.549	1014.69	249.755	1120.89	1886.18	2382.26	255.463	1043.12	821.723	635.442	259.355	1363.42
583.003	1319.81	1003.15	1511.04	0	923.068	1545.29	464.744	931.198	387.036	711.23	1082.93	815.734	756.491	907.788	891.019	989.549	667.77	280.314	1276.47	1006.09	743.046	1648.89	543.829	598.555	895.092	1412.64	474.52	951.704	1044.26	1509.03	445.748
365.204	1673.04	1102.2	1444.77	923.068	0	1267.78	1092.3	522.204	642.685	377.784	471.743	565.762	167.433	469.279	234.644	531.546	303.677	826.338	847.926	652.631	483.831	1675.93	540.33	733.176	1344.38	1221.45	799.505	624.278	810.45	1593.71	481.248
1202.71	2767.55	2271.91	343.631	1545.29	1267.78	0	1972.06	770.604	1590.36	1023.09	803.711	807.656	1258.42	823.168	1040.94	743.74	1425.18	1267.05	425.686	639.358	914.363	575.097	1069.17	1817.96	2365.46	161.786	1073.28	685.197	523.949	602.147	1301.48
854.685	856.443	636.048	1965.67	464.744	1092.3	1972.06	0	1285.31	455.394	1028.96	1397.15	1193.41	951.222	1249.15	1155.4	1338.47	788.985	734.197	1659.49	1385.33	1100.28	2111.57	914.331	432.44	431.699	1849.52	922.602	1330.89	1454.77	1972.98	716.913
449.91	2026.5	1507.94	922.765	931.198	522.204	770.604	1285.31	0	858.952	265.259	195.766	135.197	488.671	53.847	287.567	59.45	655.416	698.355	384.332	133.416	189.021	1154.3	387.652	1064.05	1641.97	705.284	553.999	103.096	288.368	1076.91	572.407
412.482	1177.23	721.988	1638.61	387.036	642.685	1590.36	455.394	858.952	0	594.905	951.506	786.407	496.317	817.304	702.378	907.764	343.659	500.667	1241.68	971.687	683.883	1818.05	523.935	259.588	783.222	1485.3	635.475	919.074	1066.42	1694.14	290.05
184.663	1761.43	1249.04	1134.58	711.23	377.784	1023.09	1028.96	265.259	594.905	0	375.307	225.519	272.391	222.43	207.998	312.867	408.541	524.524	649.519	386.536	120.92	1349.46	195.211	800.133	1377.36	940.453	444.126	338.045	510.14	1252.24	312.198
542.491	2089.13	1542.82	1017.29	1082.93	471.743	803.711	1397.15	195.766	951.506	375.307	0	328.665	503.944	188.575	267.933	148.347	688.378	870.944	379.214	258.877	351.856	1260.54	544.804	1124.55	1724.06	776.676	741.224	267.957	417.134	1201.67	682.043
396.532	1962.82	1466.38	909.258	815.734	565.762	807.656	1193.41	135.197	786.407	225.519	328.665	0	491.381	147.121	342.614	192.675	633.838	571.307	466.924	192.751	107.905	1126.59	280.173	1010.34	1567.38	717.199	419.776	137.985	287.404	1034.03	496.39
203.915	1588.23	1039.27	1397.86	756.491	167.433	1258.42	951.222	488.671	496.317	272.391	503.944	491.381	0	435.508	236.039	516.186	185.721	663.541	855.349	621.675	392.171	1617.95	397.581	627.552	1235.72	1191.68	652.668	582.055	765.166	1523.64	313.816
405.971	1980.86	1458.23	976.105	907.788	469.279	823.168	1249.15	53.847	817.304	222.43	188.575	147.121	435.508	0	234.795	90.4823	604.102	685.318	430.995	187.189	166.695	1206.76	364.652	1017.12	1599.47	759.116	552.719	155.026	341.199	1127.63	533.512
312.752	1822.92	1274.97	1210.16	891.019	234.644	1040.94	1155.4	287.567	702.378	207.998	267.933	342.614	236.039	234.795	0	299.222	420.932	727.791	627.76	418.309	279.274	1441.56	402.34	859.759	1463.79	988.536	651.162	389.82	575.865	1361.19	456.707
496.42	2070.74	1545.33	916.59	989.549	531.546	743.74	1338.47	59.45	907.764	312.867	148.347	192.675	516.186	90.4823	299.222	0	689.441	757.805	342.646	126.708	246.65	1153.13	445.769	1106.56	1689.95	689.913	612.324	121.673	290.596	1082.89	623.493
257.154	1402.52	857.443	1541.84	667.77	303.677	1425.18	788.985	655.416	343.659	408.541	688.378	633.838	185.721	604.102	420.932	689.441	0	646.239	1031.5	785.822	527.289	1752.03	463.9	442.787	1052.72	1348.33	689.559	741.484	918.238	1648.16	277.243
461.164	1580.37	1205.93	1232.96	280.314	826.338	1267.05	734.197	698.355	500.667	524.524	870.944	571.307	663.541	685.318	727.791	757.805	646.239	0	1017.16	753.888	519.295	1378.73	331.575	756.78	1157.93	1132.71	194.407	701.055	774.035	1242.64	370.397
834.181	2410.83	1887.91	675.009	1276.47	847.926	425.686	1659.49	384.332	1241.68	649.519	379.214	466.924	855.349	430.995	627.76	342.646	1031.5	1017.16	0	274.311	560.443	924.459	747.094	1447.93	2024.9	421.605	839.705	328.975	267.349	893.093	953.257
569.616	2145.12	1634.9	792.549	1006.09	652.631	639.358	1385.33	133.416	971.687	386.536	258.877	192.751	621.675	187.189	418.309	126.708	785.822	753.888	274.311	0	288.06	1027.33	472.895	1186.23	1754.45	571.98	586.945	54.7885	163.938	956.192	682.127
288.837	1858.75	1358.75	1014.69	743.046	483.831	914.363	1100.28	189.021	683.883	120.92	351.856	107.905	392.171	166.695	279.274	246.65	527.289	519.295	560.443	288.06	0	1228.57	199.219	903.744	1466.42	825.09	397.212	235.193	395.275	1131.65	394.121
1499.61	2958.26	2537.82	249.755	1648.89	1675.93	575.097	2111.57	1154.3	1818.05	1349.46	1260.54	1126.59	1617.95	1206.76	1441.56	1153.13	1752.03	1378.73	924.459	1027.33	1228.57	0	1313.04	2071.77	2536.59	505.104	1198.36	1051.74	866.005	153.378	1554.09
209.94	1699.55	1230.34	1120.89	543.829	540.33	1069.17	914.331	387.652	523.935	195.211	544.804	280.173	397.581	364.652	402.34	445.769	463.9	331.575	747.094	472.895	199.219	1313.04	0	765.594	1296.57	961.371	259.345	418.151	545.944	1199.29	242.545
616.7	965.516	466.077	1886.18	598.555	733.176	1817.96	432.44	1064.05	259.588	800.133	1124.55	1010.34	627.552	1017.12	859.759	1106.56	442.787	756.78	1447.93	1186.23	903.744	2071.77	765.594	0	611.534	1721.81	894.857	1136.22	1296.19	1950.24	523.455
1193.59	424.832	434.876	2382.26	895.092	1344.38	2365.46	431.699	1641.97	783.222	1377.36	1724.06	1567.38	1235.72	1599.47	1463.79	1689.95	1052.72	1157.93	2024.9	1754.45	1466.42	2536.59	1296.57	611.534	0	2251.73	1341.06	1701.47	1842.51	2400.1	1072.32
1113.09	2659.84	2181.79	255.463	1412.64	1221.45	161.786	1849.52	705.284	1485.3	940.453	776.676	717.199	1191.68	759.116	988.536	689.913	1348.33	1132.71	421.605	571.98	825.09	505.104	961.371	1721.81	2251.73	0	938.305	609.664	430.334	494.159	1199.92
454.266	1760.87	1356.16	1043.12	474.52	799.505	1073.28	922.602	553.999	635.475	444.126	741.224	419.776	652.668	552.719	651.162	612.324	689.559	194.407	839.705	586.945	397.212	1198.36	259.345	894.857	1341.06	938.305	0	537.097	587.922	1067.09	422.267
519.559	2093.55	1587.08	821.723	951.704	624.278	685.197	1330.89	103.096	919.074	338.045	267.957	137.985	582.055	155.026	389.82	121.673	741.484	701.055	328.975	54.7885	235.193	1051.74	418.151	1136.22	1701.47	609.664	537.097	0	186.382	973.836	629.248
683.89	2243.61	1753.6	635.442	1044.26	810.45	523.949	1454.77	288.368	1066.42	510.14	417.134	287.404	765.166	341.199	575.865	290.596	918.238	774.035	267.349	163.938	395.275	866.005	545.944	1296.19	1842.51	430.334	587.922	186.382	0	792.326	777.736
1392.89	2823	2415.7	259.355	1509.03	1593.71	602.147	1972.98	1076.91	1694.14	1252.24	1201.67	1034.03	1523.64	1127.63	1361.19	1082.89	1648.16	1242.64	893.093	956.192	1131.65	153.378	1199.29	1950.24	2400.1	494.159	1067.09	973.836	792.326	0	1437.7
144.095	1466.7	987.815	1363.42	445.748	481.248	1301.48	716.913	572.407	290.05	312.198	682.043	496.39	313.816	533.512	456.707	623.493	277.243	370.397	953.257	682.127	394.121	1554.09	242.545	523.455	1072.32	1199.92	422.267	629.248	777.736	1437.7	0

## Sheet: Mean_Intrastate_Connectivity
AGU	BCN	BCS	CAM	COA	COL	CHP	CHH	CMX	DUR	GUA	GRO	HID	JAL	MEX	MIC	MOR	NAY	NLE	OAX	PUE	QUE	ROO	SLP	SIN	SON	TAB	TAM	TLA	VER	YUC	ZAC
0	191.475	8.93354	23.4886	2813.91	538.92	128.846	208.23	8358.57	358.428	2523.57	44.8877	616.208	10139.9	792.561	1101.84	194.003	952.727	8630.15	26.3516	193.975	2259.49	73.3516	3152.07	196.513	150.762	56.5763	720.549	30.0734	547.435	62.2091	6316.43
187.09	0	6030.47	89.7071	636.966	84.2672	284.472	1840.48	12332.2	153.681	524.728	223.882	272.951	2362.38	755.599	362.843	1111.55	147.995	956.374	219.201	1231.99	265.648	463.313	207.689	3293.57	8270.02	270.025	320.244	103.132	618.243	527.273	459.37
9.35651	6147.38	0	40.894	49.4746	11.5488	15.3495	71.2154	3290.03	20.9	35.3076	22.1075	18.5385	221.716	225.677	25.6805	22.5606	9.21258	84.3818	11.8131	46.7766	25.0884	73.6684	12.0439	253.46	294.429	9.65896	17.8365	5.76038	37.5089	142.361	43.2274
23.8336	98.0909	39.9313	0	29.8281	3.74528	2317.71	72.7891	3168.32	24.3283	36.1027	62.7911	33.9645	75.0623	74.4727	28.7357	186.291	4.89261	138.858	146.613	194.339	31.1477	2056.23	39.4214	39.0367	140.766	6007.69	162.775	18.7082	779.278	4922.67	46.9997
2818.24	641.151	50.6405	32.6296	0	1573.12	382.995	7953.55	18871.7	4472.38	5200.68	76.9967	461.924	12963.5	1590.39	3116.43	205.993	2480.13	35134.2	86.4346	574.645	4509.22	177.699	5631.84	1032.72	692.613	110.133	17999.6	65.3866	1317.97	214.853	1181.87
526.402	87.9825	11.2093	3.02012	1542.46	0	68.0912	78.6434	3172.23	202.165	1449.64	34.1987	44.0314	20361.7	433.166	2505.49	200.23	894.096	1386.05	15.0188	95.2522	1262.15	18.5617	745.977	93.8915	43.3017	14.0709	485.194	10.1559	85.9151	24.9001	150.532
119.997	302.429	16.6606	2300.59	425.325	57.1867	0	366.633	23323	138.664	753.333	78.3856	1051.12	1042.2	3400.55	671.475	1311.1	196.235	504.832	1048.87	3921.21	241.538	3967.38	182.034	81.8333	123.915	15123.4	481.259	371.699	3770.8	7174.34	249.113
213.344	1848.12	74.1013	76.3403	7921.17	77.6065	374.363	0	22955.1	5585.04	750.918	163.327	476.571	2071.26	1775.96	215.101	430.566	103.099	17250.3	163.347	744.34	358.769	291.408	1616.13	2635.05	1910.85	284.162	5776.04	152.715	985.183	383.286	838.183
8469.89	12308.7	3246.48	3136.28	18990.7	3144.64	23185.2	22391.4	0	4643.87	31372	11385.4	53978.5	54442	156374	10412.2	45911.5	6248.36	48693.3	7064.01	97704	19123	12600.2	12456.2	5181	3786.39	19206.7	19593.6	9474.66	72163.4	12133.5	9278.1
355.858	158.129	20.7612	21.2691	4455.99	213.263	129.796	5622.48	4773.44	0	1235.9	40.5181	69.9741	2624.34	401.613	988.353	47.7056	439.263	6779.22	43.8785	186.979	742.625	58.2635	1094.76	1662.54	217.189	45.3129	2836.09	14.801	196.174	47.4963	1385.25
2457.28	521.726	36.6092	36.5482	5250.29	1470.15	708.633	741.07	31838.8	1244.3	0	269.326	1421.95	61556.7	3283.37	9443.57	1343.8	1774	11609.1	108.252	2247.79	18475.7	246.392	4452.23	1949.69	438.712	388.478	1907.18	207.231	1940.24	273.393	1841.42
41.2685	238.963	22.7367	65.0242	81.1579	31.3567	79.0356	167.035	11667.4	37.3993	266.759	0	183.646	748.551	1255.8	3396.52	10287.6	35.347	325.599	3611.04	12290.7	264.88	157.424	141.739	64.8235	34.6096	96.5538	117.558	990.599	3610.22	94.3379	145.44
630.133	275.17	17.7574	36.8344	451.864	44.7014	1065.34	470.215	54718.2	62.5283	1489.14	185.915	0	1197.24	5940.94	289.92	1740.59	77.3532	4325.11	170.319	12854	2595.81	287.492	2501.82	82.7928	77.4187	963.623	821.248	1819.53	7310.76	143.073	595.869
9911.44	2475.92	217.801	76.047	13183.1	20407.3	1082.98	2110.83	55183.7	2568.21	61273	757.635	1184.52	0	6141.87	43271	863.558	12857.9	25931.1	299.586	3018.15	18789.3	668.28	7620.87	5617.64	1852.62	360.041	4885.95	202.1	2765.73	662.204	10307.2
807.057	733.191	224.82	82.9739	1768.56	471.107	3472.34	1864.51	158052	378.493	3280.12	1210.35	5916.97	6130.53	0	1991.64	3703.22	1095.34	2191.05	199.302	9784.82	3030.77	765.348	1251.66	327.028	224.272	1960.5	1862.45	937.077	8521.69	1203.15	638.254
1093.93	385.528	24.7236	29.3452	3113.66	2479.42	651.101	224.895	10854.3	1019.96	9626.18	3427.71	293.383	43572.2	2087.39	0	383.634	2401.44	2968.43	105.328	789.91	3653.46	135.408	1551.23	936.277	171.363	129.037	911.972	74.7385	719.372	102.502	626.05
189.864	1104.33	23.2713	175.338	216.514	212.823	1261.72	438	46796.3	45.5068	1464.53	10013.8	1718.95	832.029	3687.3	413.13	0	60.958	710.209	1790.47	6181.91	414.177	378.781	357.297	75.9875	95.6003	1079.43	568.518	445.378	5759.67	417.311	360.451
1016.06	155.579	9.28532	5.23552	2664.42	920.527	191.044	104.115	5962.01	443.654	1858.29	36.1966	77.9821	13202.2	1042.65	2469.75	59.8725	0	1475.52	15.7233	149.083	1683.96	19.8468	1182.78	521.411	106.006	21.1534	609.952	18.4306	143.911	43.0218	209.848
8462.96	977.873	76.8789	134.317	34842.3	1416.32	510.503	16994.1	48952.3	6706.68	11586	317.945	4328.6	25882.9	2248.78	2920.6	684.465	1471.81	0	401.306	1509.53	5184.97	823.942	30398.9	981.92	602.957	491.284	34919.5	215.806	5662.72	644.802	1701.78
27.8393	224.254	13.3977	145.616	88.348	14.9388	1037.76	158.052	7191.67	44.4084	110.046	3660.93	173.376	300.426	201.602	112.066	1780	17.8318	420.279	0	16539.7	131.124	363.537	106.322	70.2284	44.5366	414.597	98.0489	1274.63	11256.2	1087.28	133.457
196.08	1251.45	45.5314	195.735	608.881	91.2636	4060.7	753.874	98623.7	182.101	2286.3	11987.7	12873.9	2975.44	9617.58	793.568	6061.59	163.234	1484.97	16202.1	0	810.347	963.328	901.312	256.078	193.551	3419.44	1497.22	17548.7	45459	488.322	700.614
2288.83	260.073	24.3576	29.5936	4596.37	1223.5	225.029	360.692	19068.4	711.921	18609.6	259.025	2499.18	18918.7	2967.72	3733.31	411.579	1788.07	5096.56	126.636	808.251	0	245.596	4491.58	392.216	1144.67	279.312	1280.53	88.0454	663.909	128.536	1368.51
71.5418	533.449	69.189	1972.58	179.599	17.96	3729.87	300.895	12602.3	52.8087	253.663	157.89	260.497	684.183	799.045	129.417	378.085	22.5291	882.078	354.866	844.969	247.859	0	188.594	267.273	117.37	4907.38	1126.65	108.088	1325.93	10796	154.484
3263.83	209.88	12.0966	37.1535	5679.15	721.719	165.471	1595.39	12611.9	1075.83	4467.8	144.884	2487.19	7753.63	1177.5	1568.05	360.736	1168.01	30452.9	109.095	917.019	4464.76	178.762	0	444.779	176.75	88.1922	3382.97	57.6254	1491.94	99.6283	2314.29
194.177	3223.58	260.1	40.3597	1006.07	95.9246	75.5943	2625.41	5292.76	1674.48	2024.83	69.4747	92.174	5737.88	326.717	922.423	82.9375	511.21	1013.9	65.8838	250.865	411.501	276.327	420.768	0	25964.5	38.7406	159.192	21.1636	309.501	178.051	566.241
156.568	8529.93	310.227	146.651	710.748	46.0576	131.059	1920.71	3949.05	223.525	486.888	34.2571	73.4732	1906.87	230.845	179.853	99.7714	107.038	644.426	47.236	205.257	1095.49	126.851	181.05	26723.6	0	40.2737	120.201	19.8014	280.993	121.898	219.085
51.6213	281.69	9.92331	5995.84	111.042	15.184	15099	248.476	19505.4	44.6959	374.717	94.7511	910.074	352.74	1983.33	126.979	1058.49	20.9805	501.541	413.319	3436.71	283.098	4934.28	90.3654	36.4443	41.7659	0	465.01	309.558	4220.52	6943.3	180.709
691.151	344.963	16.9853	157.862	18285.5	517.239	464.546	5797.98	19730.8	2880.85	1870.49	110.023	825.427	4912.3	1830.34	914	582.617	553.577	35433.6	96.7103	1463.61	1279.84	1096.18	3374.15	158.603	118.566	427.231	0	160.319	2283.49	472.425	484.098
30.4306	106.373	4.92114	16.7804	63.0374	9.75016	399.019	148.222	9449.01	13.8549	175.963	958.567	1826.52	212.563	950.779	63.7019	391.789	17.0342	212.108	1236.17	17475	87.0936	111.877	53.1024	20.9102	19.3946	333.116	162.292	0	2925.99	41.0178	113.09
538.545	632.983	37.8596	805.427	1278.94	81.9064	3738.78	918.349	72999.1	191.218	1687.96	3664.54	7269.51	2637.24	8387.26	648.89	5802.14	150.935	5467.6	11064.5	46321.4	673.483	1429.87	1534.59	308.617	270.515	4218.93	2303.29	2937.31	0	4009.01	536.668
55.5113	593.021	135.316	4948.67	240.76	29.0083	7272	400.652	12455.9	57.9592	273.848	104.467	149.26	682.404	1274.72	118.397	429.853	39.7187	667.485	1049.93	503.65	136.18	10850.4	109.26	171.711	117.482	7041.28	480.484	43.3055	4123.95	0	132.046
6261.27	457	40.2607	47.8207	1200.46	143.785	250.524	834.545	9368.55	1403.94	1869.7	148.875	582.208	10447.7	625.121	636.65	352.151	211.847	1720.29	134.703	695.359	1395.83	156.326	2261.26	569.302	211.962	184.422	481.27	116.269	542.821	129.484	0
