# Supplementary figures and images for: Comparing the evolutionary dynamics of predominant SARS-CoV-2 virus lineages co-circulating in Mexico
Source: eLife journal article supplement (doi:10.7554/elife.82069), 2023-07-27

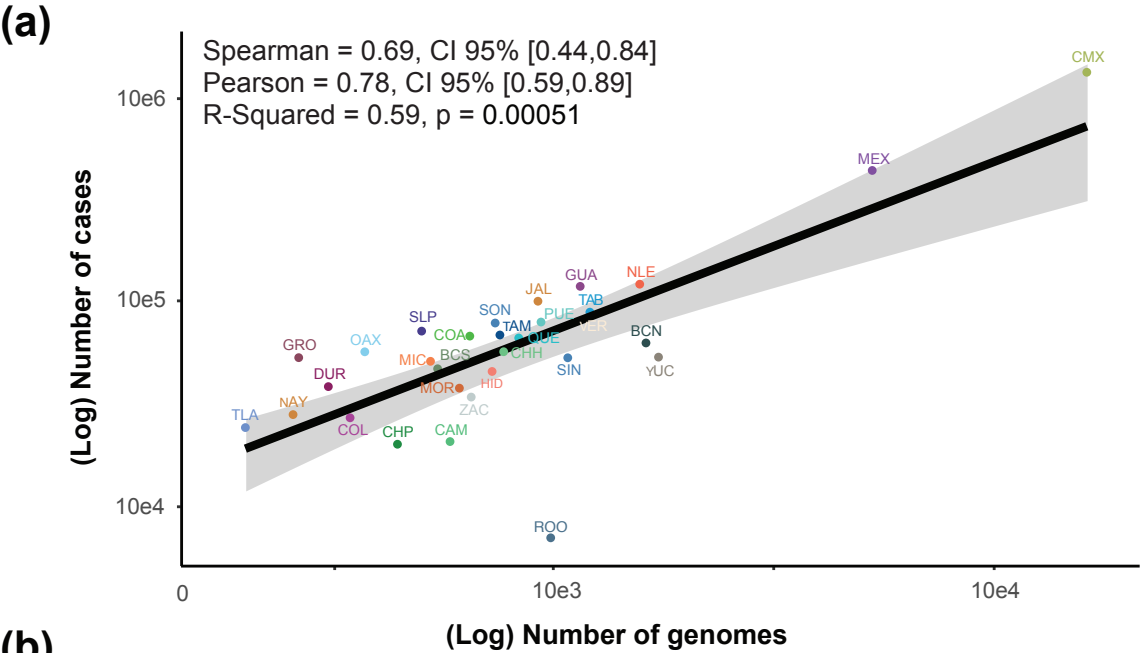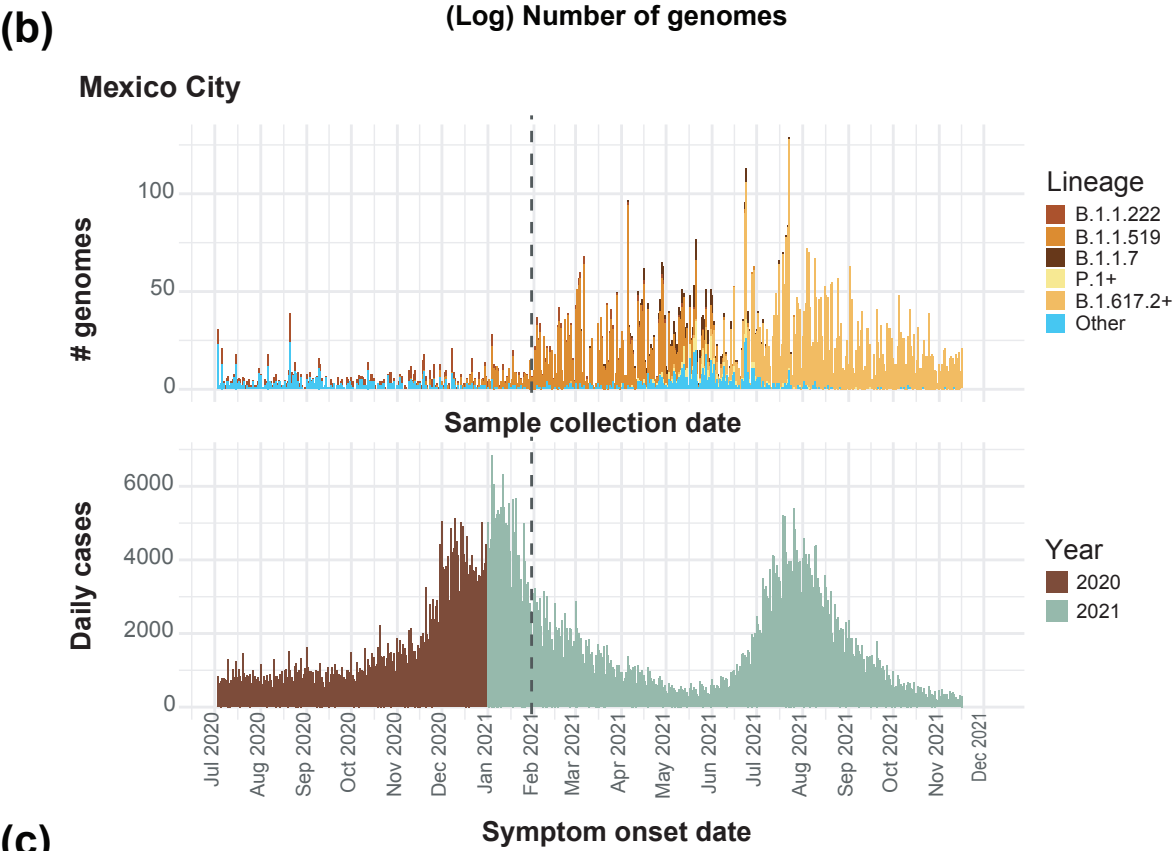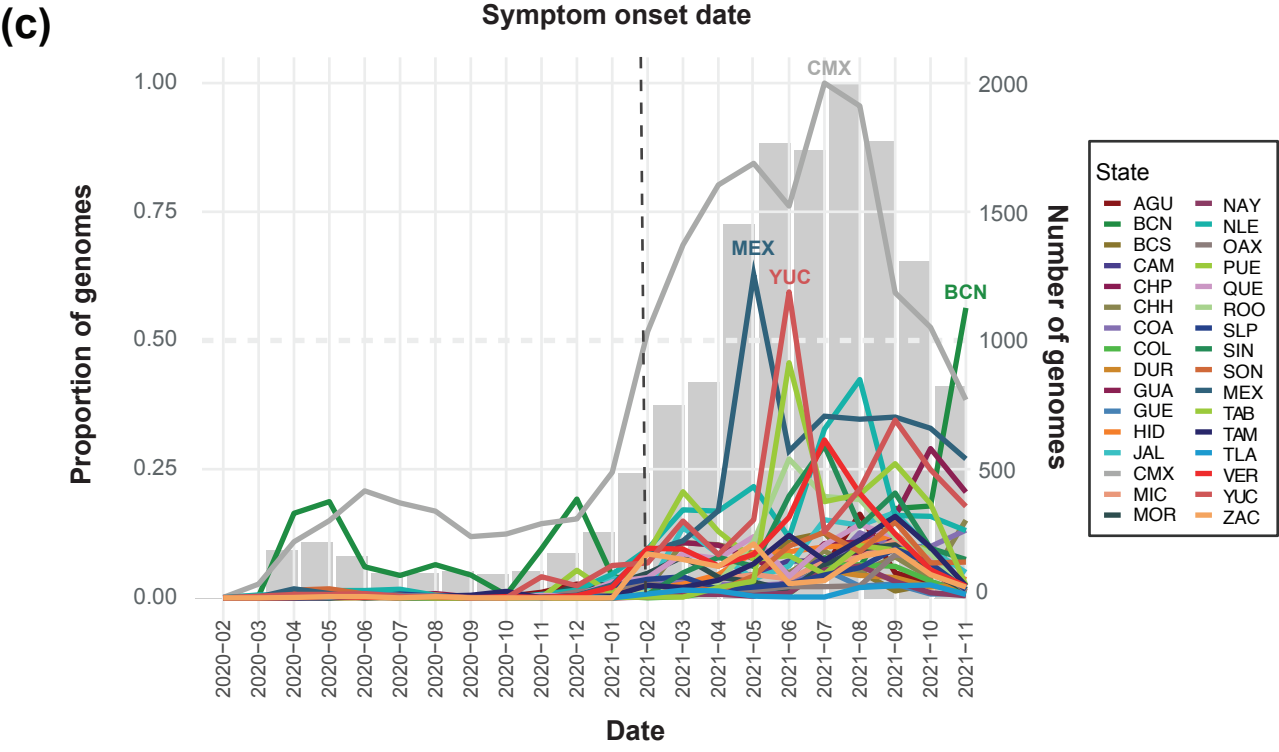

Supplement: supp [file elife_poa_e82069_Figure_1_figure_supplement_1.pdf › elife_poa_e82069_Figure_1_figure_supplement_1.pdf]

(a)

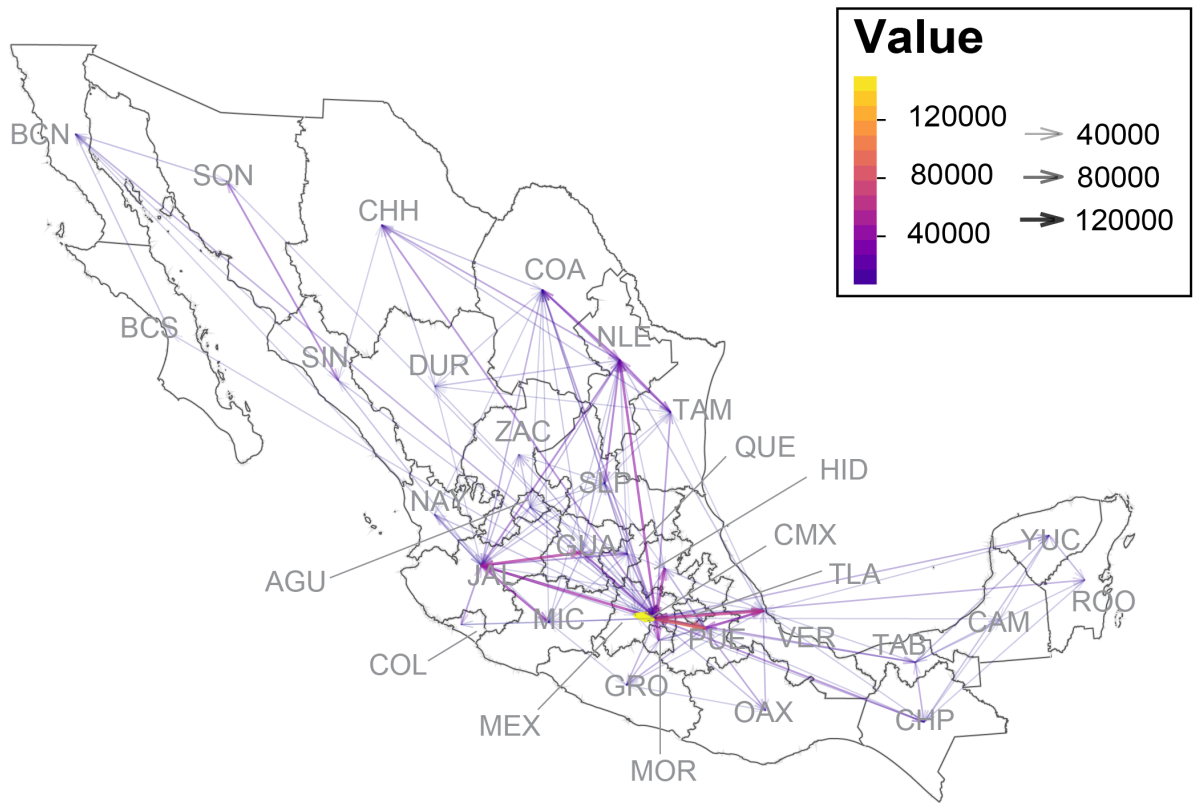

(b)

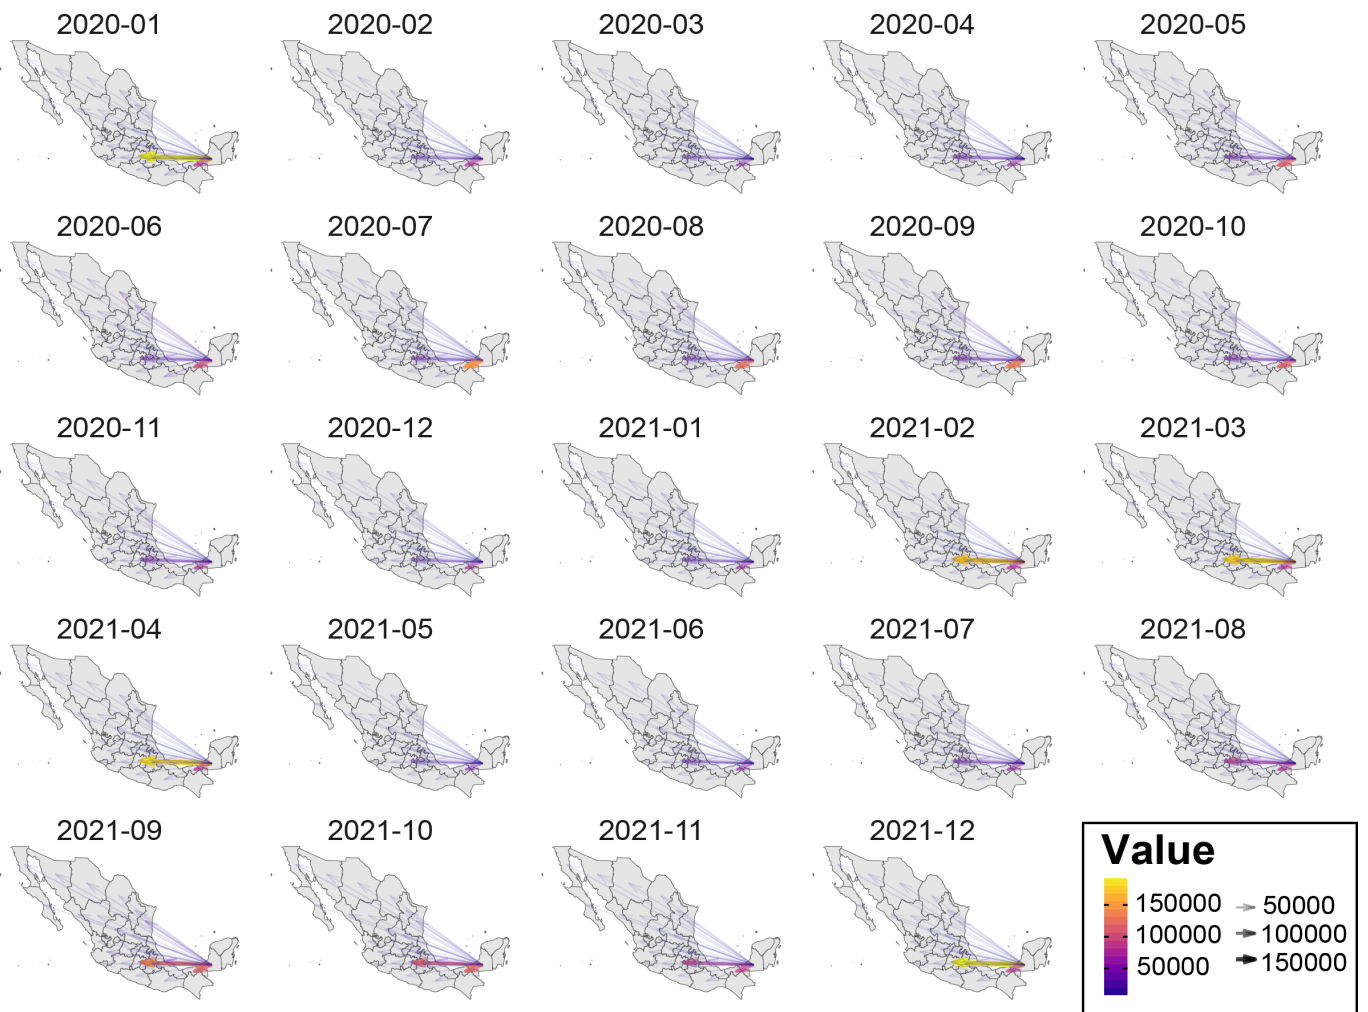

Supplement: supp [file elife_poa_e82069_Figure_1_figure_supplement_2.pdf › elife_poa_e82069_Figure_1_figure_supplement_2.pdf]

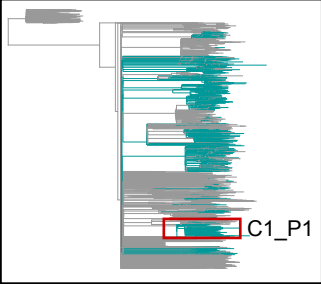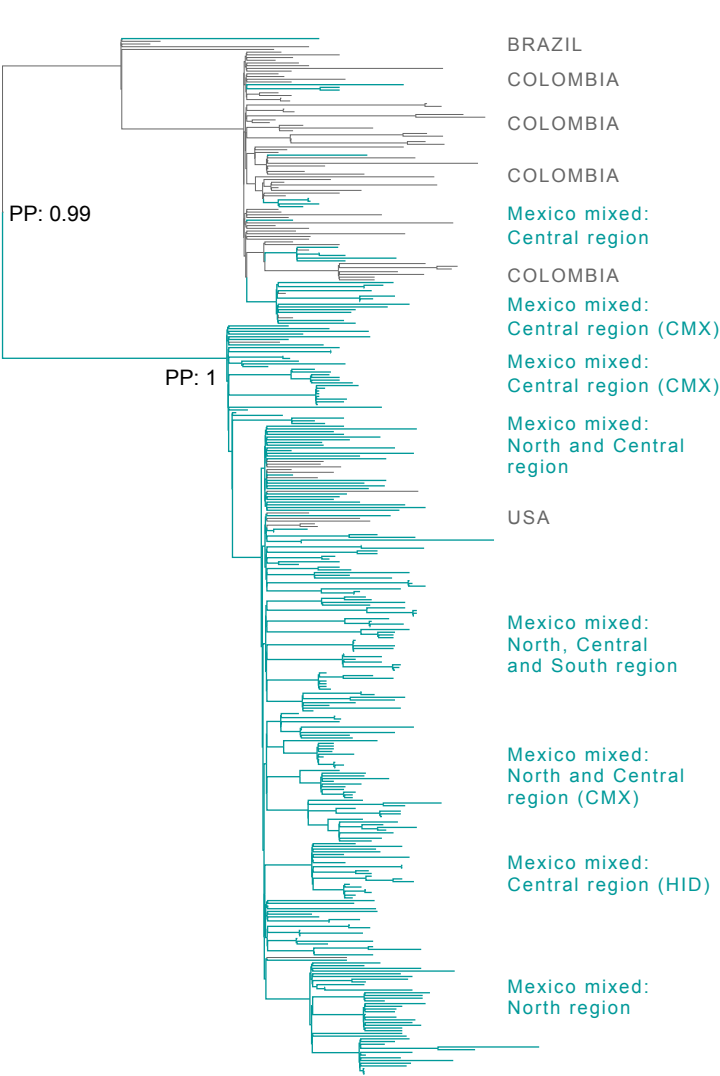

Mexico  
other

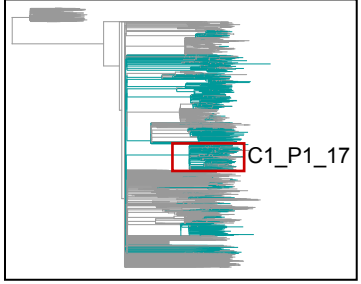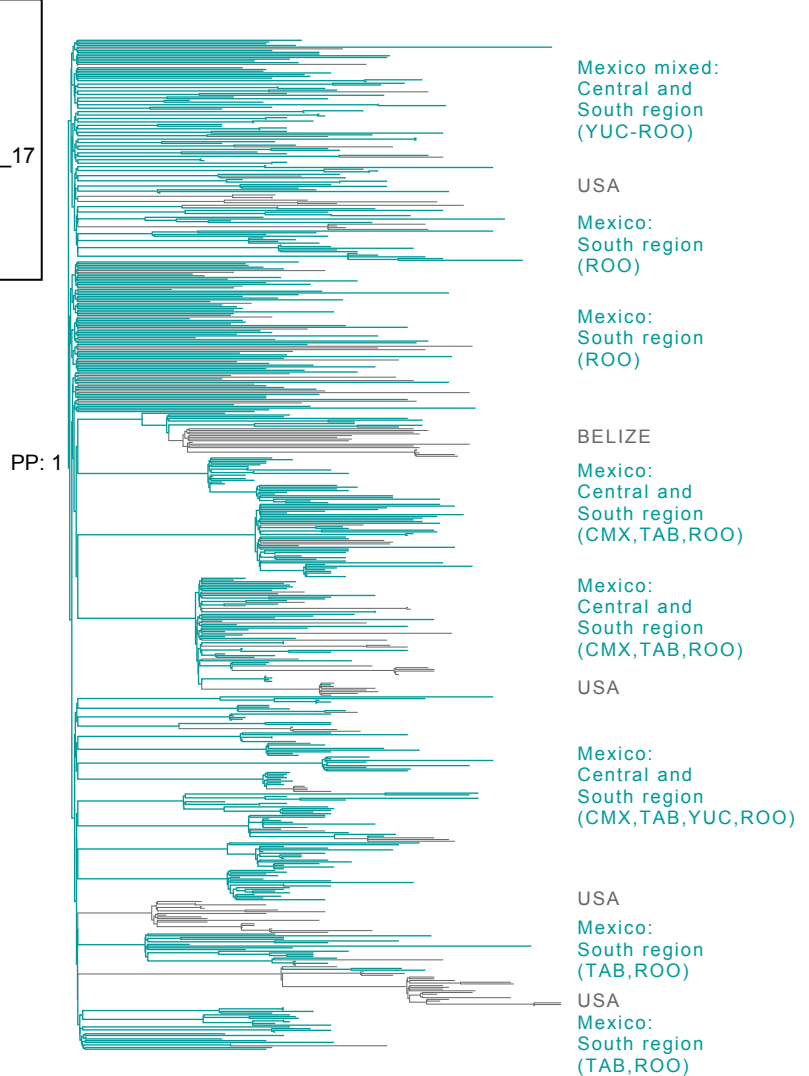

Supplement: supp [file elife_poa_e82069_Figure_3_figure_supplement_3.pdf › elife_poa_e82069_Figure_3_figure_supplement_3.pdf]
